# Supplementary material for: Structural and functional properties of a magnesium transporter of the SLC11/NRAMP family
Source: eLife journal article supplement (doi:10.7554/elife.74589), 2022-01-10
Supplement: supp [file Figure1.xlsx]

## Sheet: Fig1B
Identifier	Sequence
XP_011858053.1	MRKKQLKTEAAPHCELKSYSKNSATQVSTMVLGLEQKMSDDSVSGDHGESACLGTVNPVSSNPSLPRSPGDSEEYFATYFNEKISIPEEEYSCFSFRKLWAFTGPGFLMSIAYLDPGNIESDLQSGAVAGFKLLWILLLATLVGLLLQRLAARLGVVTGLHLAEVCHRQYPKVPRIILWLMVELAIIGSDMQEVIGSAIAINLLSVGRIPLWGGVLITIADTFVFLFLDKYGLRKLEAFFGFLITIMALTFGYEYVTVKPSQSQVLKGMFVPSCSGCRTPQIEQAVGIVGAVIMPHNMYLHSALVKSRQVNRNNKQEVREANKYFFIESCIALFVSFIINVFVVSVFAEAFFGKTNEQVVEVCTNTSSPHAGLFPKDNSTLAVDIYKGGVVLGCYFGPA…
XP_017801358.2	MRKKQLQTEAAPHCELKSYSKNSATQVSTMVLGLEQKMSDDSVSGDHGESACLGTVNPVSSNPSLPRSPGDSEEYFATYFNEKISIPEEEYSCFSFRKLWAFTGPGFLMSIAYLDPGNIESDLQSGAVAGFKLLWILLLATLVGLLLQRLAARLGVVTGLHLAEVCHRQYPKVPRIILWLMVELAIIGSDMQEVIGSAIAINLLSVGRIPLWGGVLITIADTFVFLFLDKYGLRKLEAFFGFLITIMALTFGYEYVTVKPSQSQVLKGMFVPSCSGCRTPQIEQAVGIVGAVIMPHNMYLHSALVKSRQVNRNNKQEVREANKYFFIESCIALFVSFIINVFVVSVFAEAFFGKTNEQVVEVCTNTSSPHAGLFPKDNSTLAVDIYKGGVVLGCYFGPA…
XP_011727264.1	MRKKQLKTEAAPHCELKSYSKNSATQVSTMVLSLEQKMSDDSVSGDHGESACLGTVNPVSSNPSLPRSPGDSEEYFATYFNEKISIPEEEYSCFSFRKLWAFTGPGFLMSIAYLDPGNIESDLQSGAVAGFKLLWILLLATLVGLLLQRLAARLGVVTGLHLAEVCHRQYPKVPRIILWLMVELAIIGSDMQEVIGSAIAINLLSVGRIPLWGGVLITIADTFVFLFLDKYGLRKLEAFFGFLITIMALTFGYEYVTVKPSQSQVLKGMFVPSCSGCRTPQIEQAVGIVGAVIMPHNMYLHSALVKSRQVNRNNKQEVREANKYFFIESCIALFVSFIINVFVVSVFAEAFFGKTNEQVVEVCTNTSSPHAGLFPKDNSTLAVDIYKGGVVLGCYFGPA…
XP_010383634.1	MRKKQLKTEAAPHCELKSYSKNSATQVSTMVLGLEQKMSDDSVSGDHGESACLGTVNHVYSNPSLPQSPGDSEEYFATYFNEKIAIPEEEYSCFSFRKLWAFTGPGFLMSIAYLDPGNIESDLQSGAVAGFKLLWILLLATLVGLLLQRLAARLGVVTGLHLAEVCHRQYPKVPRIILWLMVELAIIGSDMQEVIGSAIAINLLSVGRVPLWGGVLITIADTFVFLFLDKYGLRKLEAFFGFLITIMALTFGYEYVTVKPSQSQVLKGMFVPSCSGCRTSQIEQAVGIVGAVIMPHNMYLHSALVKSRQVNRNNKQEVREANKYFFIESCIALFVSFIINVFVVSVFAEAFFGKTNEQVVEVCTNTSSPHADLFPKDNSTLAVDIYKGGVVLGCYFGPA…
XP_011786054.1	MRKKQLKTEAAPHCELKSYSKNSATQVSTMVLGLEQKMSDDSVSGDHGESACLGTVNSVYSNPSLPQSPGDSEEYFATYFNEKISIPEEEYSCFSFRKLWAFTGPGFLMSIAYLDPGNIESDLQSGAVAGFKLLWILLLATLVGLLLQRLAARLGVVTGLHLAEVCHRQYPKVPRITLWLMVELAIIGSDMQEVIGSAIAINLLSVGRIPLWGGVLITIADTFVFLFLDKYGLRKLEAFFGFLITIMALTFGYEYVTVKPSQSQVLKGMFVPSCSGCRTSQIEQAVGIVGAVIMPHNMYLHSALVKSRQVNRNNKQEVREANKYFFIESCIALFVSFIINVFVVSVFAEAFFGKTNEQVVEVCTNTSSPHADLFPKDNSTLAVDIYKGGVVLGCYFGPA…
XP_008949491.1	MRKKQLKTEAAPHCELKSYSKNSATQVSTMVLGPEQKMSDDSVSGDHGESASLGNINPAYSNPSLPQSPGDSEEYFATYFNEKISIPEEEYSCFSFRKLWAFTGPGFLMSIAYLDPGNIESDLQSGAVAGFKLLWILLLATLVGLLLQRLAARLGVVTGLHLAEVCHRQYPKVPRVILWLMVELAIIGSDMQEVIGSAIAINLLSVGRIPLWGGVLITIADTFVFLFLDKYGLRKLEAFFGFLITIMALTFGYEYVTVKPSQSQVLKGMFVPSCSGCRTPQIEQAVGIVGAVIMPHNMYLHSALVKSRQVNRNNKQEVREANKYFFIESCIALFVSFIINVFVVSVFAEAFFGKTNEQVVEVCTNTSSPHAGLFPKDNSTLAVDIYKGGVVLGCYFGPA…
XP_016778892.2	MRKKQLETEAAPHCELKSYSKNSATQVSTMVLGPEQKMSDDSVSGDHGESASLGNINPAYSNPSLPQSPGDSEEYFATYFNEKISIPEEEYSCFSFRKLWAFTGPGFLMSIAYLDPGNIESDLQSGAVAGFKLLWILLLATLVGLLLQRLAARLGVVTGLHLAEVCHRQYPKVPRVILWLMVELAIIGSDMQEVIGSAIAINLLSVGRIPLWGGVLITIADTFVFLFLDKYGLRKLEAFFGFLITIMALTFGYEYVTVKPSQSQVLKGMFVPSCSGCRTPQIEQAVGIVGAVIMPHNMYLHSALVKSRQVNRNNKQEVREANKYFFIESCIALFVSFIINVFVVSVFAEAFFGKTNEQVVEVCTNTSSPHAGLFPKDNSTLAVDIYKGGVVLGCYFGPA…
XP_005268968.1	MRKKQLKTEAAPHCELKSYSKNSATQVSTMVLGPEQKMSDDSVSGDHGESASLGNINPAYSNPSLSQSPGDSEEYFATYFNEKISIPEEEYSCFSFRKLWAFTGPGFLMSIAYLDPGNIESDLQSGAVAGFKLLWILLLATLVGLLLQRLAARLGVVTGLHLAEVCHRQYPKVPRVILWLMVELAIIGSDMQEVIGSAIAINLLSVGRIPLWGGVLITIADTFVFLFLDKYGLRKLEAFFGFLITIMALTFGYEYVTVKPSQSQVLKGMFVPSCSGCRTPQIEQAVGIVGAVIMPHNMYLHSALVKSRQVNRNNKQEVREANKYFFIESCIALFVSFIINVFVVSVFAEAFFGKTNEQVVEVCTNTSSPHAGLFPKDNSTLAVDIYKGGVVLGCYFGPA…
XP_018894129.1	MRKKQLKTEAAPHCELKSYSKNSATQVSTMVLGPEQKMSDDSVSGDHGESASLGNINPAYSNPSLPQSPGDSEEYFATYFNEKISIPEEEYSCFSFRKLWAFTGPGFLMSIAYLDPGNIESDLQSGAVAGFKLLWILLLATLVGLLLQRLAARLGVVTGLHLAEVCHRQYPKVPRVILWLMVELAIIGSDMQEVIGSAIAINLLSVGRIPLWGGVLITIADTFVFLFLDKYGLRKLEAFFGFLITIMALTFGYEYVTVKPSQSQVLKGMFVPSCSGCRTPQIEQAVGIVGAVIMPHNMYLHSALVKSRQINRNNKQEVREANKYFFIESCIALFVSFIINVFVVSVFAEAFFGKTNEQVVEVCTNTSSPHAGLFPKDNSTLAVDIYKGGVVLGCYFGPA…
NP_001167596.1	MRKKQLKTEAAPHCELKSYSKNSATQVSTMVLGPEQKMSDDSVSGDHGESASLGNINPAYSNPSLSQSPGDSEEYFATYFNEKISIPEEEYSCFSFRKLWAFTGPGFLMSIAYLDPGNIESDLQSGAVAGFKLLWILLLATLVGLLLQRLAARLGVVTGLHLAEVCHRQYPKVPRVILWLMVELAIIGSDMQEVIGSAIAINLLSVGRIPLWGGVLITIADTFVFLFLDKYGLRKLEAFFGFLITIMALTFGYEYVTVKPSQSQVLKGMFVPSCSGCRTPQIEQAVGIVGAVIMPHNMYLHSALVKSRQVNRNNKQEVREANKYFFIESCIALFVSFIINVFVVSVFAEAFFGKTNEQVVEVCTNTSSPHAGLFPKDNSTLAVDIYKGGVVLGCYFGPA…
XP_016778893.2	MRKKQLETEAAPHCELKSYSKNSATQVSTMVLGPEQKMSDDSVSGDHGESASLGNINPAYSNPSLPQSPGDSEEYFATYFNEKISIPEEEYSCFSFRKLWAFTGPGFLMSIAYLDPGNIESDLQSGAVAGFKLLWILLLATLVGLLLQRLAARLGVVTGLHLAEVCHRQYPKVPRVILWLMVELAIIGSDMQEVIGSAIAINLLSVGRIPLWGGVLITIADTFVFLFLDKYGLRKLEAFFGFLITIMALTFGYEYVTVKPSQSQVLKGMFVPSCSGCRTPQIEQAVGIVGAVIMPHNMYLHSALVKSRQVNRNNKQEVREANKYFFIESCIALFVSFIINVFVVSVFAEAFFGKTNEQVVEVCTNTSSPHAGLFPKDNSTLAVDIYKGGVVLGCYFGPA…
CAD38517.1	MRKKQLKTEAAPHCELKSYSKNSATQVSTMVLGPEQKMSDDSVSGDHGESASLGNINPAYSNPSLSQSPGDSEEYFATYFNEKISIPEEEYSCFSFRKLWAFTGPGFLMSIAYLDPGNIESDLQSGAVAGFKLLWILLLATLVGLLLQRLAARLGVVTGLHLAEVCHRQYPKVPRVILWLMVELAIIGSDMQEVIGSAIAINLLSVGRIPLWGGVLITIADTFVFLFLDKYGLRKLEAFFGFLITIMALTFGYEYVTVKPSQSQVLKGMFVPSCSGCRTPQIEQAVGIVGAVIMPHNMYLHSALVKSRQVNRNNKQEVREANKYFFIESCIALFVSFIINVFVVSVFAEAFFGKTNEQVVEVCTNTSSPHAGLFPKDNSTLAVDIYKGGVVLGCYFGPA…
PNJ25630.1	MRKKQLKTEAAPHCELKSYSKNSATQVSTMVLGPEQKMSDDSVSGDHGESASLGTINPAYSNPSLPQSPGDSEEYFATYFNEKISIPEEEYSCFSFRKLWAFTGPGFLMSIAYLDPGNIESDLQSGAVAGFKLLWILLLATLVGLLLQRLAARLGVVTGLHLAEVCHRQYPKVPRVILWLMVELAIIGSDMQEVIGSAIAINLLSVGRVPLWGGVLITIADTFVFLFLDKYGLRKLEAFFGFLITIMALTFGYEYVTVKPSQSQVLKGMFVPSCSGCRTPQIEQAVGIVGAVIMPHNMYLHSALVKSRQVNRNNKQEVREANKYFFIESCIALFVSFIINVFVVSVFAEAFFGKTNEQVVEVCTNTSSPHAGLFPKDNSTLAVDIYKGGVVLGCYFGPA…
EHH20731.1	MRKKQLKTEAAPHCELKSYSKNSATQVSTMVLGLEQKMSDDSVSGDHGESACLGTVNPVSSNPSLPRSPGDSEEYFATYFNEKISIPEEEYSCFSFRKLWAFTGPGFLMSIAYLDPGNIESDLQSGAVAGFKLLWILLLATLVGLLLQRLAARLGVVTGLHLAEVCHRQYPKVPRIILWLMVELAIIGSDMQEVIGSAIAINLLSVGRIPLWGGVLITIADTFVFLFLDKYGLRKLEAFFGFLITIMALTFGYEYVTVKPSQSQVLKGMFVPSCSGCRTPQIEQAVGIVGAVIMPHNMYLHSALVKSRQVNRNNKQEVREANKYFFIESCIALFVSFIINVFVVSVFAEAFFGKTNEQVVEVCTNTSSPHAGLFPKDNSTLAVDIYKGGVVLGCYFGPA…
NP_001167597.1	MVLGPEQKMSDDSVSGDHGESASLGNINPAYSNPSLSQSPGDSEEYFATYFNEKISIPEEEYSCFSFRKLWAFTGPGFLMSIAYLDPGNIESDLQSGAVAGFKLLWILLLATLVGLLLQRLAARLGVVTGLHLAEVCHRQYPKVPRVILWLMVELAIIGSDMQEVIGSAIAINLLSVGRIPLWGGVLITIADTFVFLFLDKYGLRKLEAFFGFLITIMALTFGYEYVTVKPSQSQVLKGMFVPSCSGCRTPQIEQAVGIVGAVIMPHNMYLHSALVKSRQVNRNNKQEVREANKYFFIESCIALFVSFIINVFVVSVFAEAFFGKTNEQVVEVCTNTSSPHAGLFPKDNSTLAVDIYKGGVVLGCYFGPAALYIWAVGILAAGQSSTMTGTYSGQFVME…
XP_003825920.1	MVLGPEQKMSDDSVSGDHGESASLGNINPAYSNPSLPQSPGDSEEYFATYFNEKISIPEEEYSCFSFRKLWAFTGPGFLMSIAYLDPGNIESDLQSGAVAGFKLLWILLLATLVGLLLQRLAARLGVVTGLHLAEVCHRQYPKVPRVILWLMVELAIIGSDMQEVIGSAIAINLLSVGRIPLWGGVLITIADTFVFLFLDKYGLRKLEAFFGFLITIMALTFGYEYVTVKPSQSQVLKGMFVPSCSGCRTPQIEQAVGIVGAVIMPHNMYLHSALVKSRQVNRNNKQEVREANKYFFIESCIALFVSFIINVFVVSVFAEAFFGKTNEQVVEVCTNTSSPHAGLFPKDNSTLAVDIYKGGVVLGCYFGPAALYIWAVGILAAGQSSTMTGTYSGQFVME…
XP_004053169.1	MVLGPEQKMSDDSVSGDHGESASLGNINPAYSNPSLPQSPGDSEEYFATYFNEKISIPEEEYSCFSFRKLWAFTGPGFLMSIAYLDPGNIESDLQSGAVAGFKLLWILLLATLVGLLLQRLAARLGVVTGLHLAEVCHRQYPKVPRVILWLMVELAIIGSDMQEVIGSAIAINLLSVGRIPLWGGVLITIADTFVFLFLDKYGLRKLEAFFGFLITIMALTFGYEYVTVKPSQSQVLKGMFVPSCSGCRTPQIEQAVGIVGAVIMPHNMYLHSALVKSRQINRNNKQEVREANKYFFIESCIALFVSFIINVFVVSVFAEAFFGKTNEQVVEVCTNTSSPHAGLFPKDNSTLAVDIYKGGVVLGCYFGPAALYIWAVGILAAGQSSTMTGTYSGQFVME…
NP_001253618.1	MVLGLEQKMSDDSVSGDHGESACLGTVNPVSSNPSLPRSPGDSEEYFATYFNEKISIPEEEYSCFSFRKLWAFTGPGFLMSIAYLDPGNIESDLQSGAVAGFKLLWILLLATLVGLLLQRLAARLGVVTGLHLAEVCHRQYPKVPRIILWLMVELAIIGSDMQEVIGSAIAINLLSVGRIPLWGGVLITIADTFVFLFLDKYGLRKLEAFFGFLITIMALTFGYEYVTVKPSQSQVLKGMFVPSCSGCRTPQIEQAVGIVGAVIMPHNMYLHSALVKSRQVNRNNKQEVREANKYFFIESCIALFVSFIINVFVVSVFAEAFFGKTNEQVVEVCTNTSSPHAGLFPKDNSTLAVDIYKGGVVLGCYFGPAALYIWAVGILAAGQSSTMTGTYSGQFVME…
XP_025257034.1	MVLGLEQKMSDDSVSGDHGESACLGTVNPVSSNPSLPRSPGDSEEYFATYFNEKISIPEEEYSCFSFRKLWAFTGPGFLMSIAYLDPGNIESDLQSGAVAGFKLLWILLLATLVGLLLQRLAARLGVVTGLHLAEVCHRQYPKVPRIILWLMVELAIIGSDMQEVIGSAIAINLLSVGRIPLWGGVLITIADTFVFLFLDKYGLRKLEAFFGFLITIMALTFGYEYVTVKPSQSQVLKGMFVPSCSGCRTPQIEQAVGIVGAVIMPHNMYLHSALVKSRQVNRNNKQEVREANKYFFIESCIALFVSFIINVFVVSVFAEAFFGKTNEQVVEVCTNTSSPHAGLFPKDNSTLAVDIYKGGVVLGCYFGPAALYIWAVGILAAGQSSTMTGTYSGQFVME…
XP_011727266.1	MVLSLEQKMSDDSVSGDHGESACLGTVNPVSSNPSLPRSPGDSEEYFATYFNEKISIPEEEYSCFSFRKLWAFTGPGFLMSIAYLDPGNIESDLQSGAVAGFKLLWILLLATLVGLLLQRLAARLGVVTGLHLAEVCHRQYPKVPRIILWLMVELAIIGSDMQEVIGSAIAINLLSVGRIPLWGGVLITIADTFVFLFLDKYGLRKLEAFFGFLITIMALTFGYEYVTVKPSQSQVLKGMFVPSCSGCRTPQIEQAVGIVGAVIMPHNMYLHSALVKSRQVNRNNKQEVREANKYFFIESCIALFVSFIINVFVVSVFAEAFFGKTNEQVVEVCTNTSSPHAGLFPKDNSTLAVDIYKGGVVLGCYFGPAALYIWAVGILAAGQSSTMTGTYSGQFVME…
XP_010383635.1	MVLGLEQKMSDDSVSGDHGESACLGTVNHVYSNPSLPQSPGDSEEYFATYFNEKIAIPEEEYSCFSFRKLWAFTGPGFLMSIAYLDPGNIESDLQSGAVAGFKLLWILLLATLVGLLLQRLAARLGVVTGLHLAEVCHRQYPKVPRIILWLMVELAIIGSDMQEVIGSAIAINLLSVGRVPLWGGVLITIADTFVFLFLDKYGLRKLEAFFGFLITIMALTFGYEYVTVKPSQSQVLKGMFVPSCSGCRTSQIEQAVGIVGAVIMPHNMYLHSALVKSRQVNRNNKQEVREANKYFFIESCIALFVSFIINVFVVSVFAEAFFGKTNEQVVEVCTNTSSPHADLFPKDNSTLAVDIYKGGVVLGCYFGPAALYIWAVGILAAGQSSTMTGTYSGQFVME…
XP_011786055.1	MVLGLEQKMSDDSVSGDHGESACLGTVNSVYSNPSLPQSPGDSEEYFATYFNEKISIPEEEYSCFSFRKLWAFTGPGFLMSIAYLDPGNIESDLQSGAVAGFKLLWILLLATLVGLLLQRLAARLGVVTGLHLAEVCHRQYPKVPRITLWLMVELAIIGSDMQEVIGSAIAINLLSVGRIPLWGGVLITIADTFVFLFLDKYGLRKLEAFFGFLITIMALTFGYEYVTVKPSQSQVLKGMFVPSCSGCRTSQIEQAVGIVGAVIMPHNMYLHSALVKSRQVNRNNKQEVREANKYFFIESCIALFVSFIINVFVVSVFAEAFFGKTNEQVVEVCTNTSSPHADLFPKDNSTLAVDIYKGGVVLGCYFGPAALYIWAVGILAAGQSSTMTGTYSGQFVME…
EAW58165.1	MVLGPEQKMSDDSVSGDHGESASLGNINPAYSNPSLSQSPGDSEEYFATYFNEKISIPEEEYSCFSFRKLWAFTGPGFLMSIAYLDPGNIESDLQSGAVAGFKLLWILLLATLVGLLLQRLAARLGVVTGLHLAEVCHRQYPKVPRVILWLMVELAIIGSDMQEVIGSAIAINLLSVGRIPLWGGVLITIADTFVFLFLDKYGLRKLEAFFGFLITIMALTFGYEASVKPSQSQVLKGMFVPSCSGCRTPQIEQAVGIVGAVIMPHNMYLHSALVKSRQVNRNNKQEVREANKYFFIESCIALFVSFIINVFVVSVFAEAFFGKTNEQVVEVCTNTSSPHAGLFPKDNSTLAVDIYKGGVVLGCYFGPAALYIWAVGILAAGQSSTMTGTYSGQFVMEG…
XP_024112857.1	MVLGPEQKMSDDSVSGDHGESASLGTINPAYSNPSLPQSPGDSEEYFATYFNEKISIPEEEYSCFSFRKLWAFTGPGFLMSIAYLDPGNIESDLQSGAVAGFKLLWILLLATLVGLLLQRLAARLGVVTGLHLAEVCHRQYPKVPRVILWLMVELAIIGSDMQEVIGSAIAINLLSVGRVPLWGGVLITIADTFVFLFLDKYGLRKLEAFFGFLITIMALTFGYEYVTVKPSQSQVLKGMFVPSCSGCRTPQIEQAVGIVGAVIMPHNMYLHSALVKSRQVNRNNKQEVREANKYFFIESCIALFVSFIINVFVVSVFAEAFFGKTNEQVVEVCTNTSSPHAGLFPKDNSTLAVDIYKGGVVLGCYFGPAALYIWAVGILAAGQSSTMTGTYSGQFVME…
NP_000608.1	MVLGPEQKMSDDSVSGDHGESASLGNINPAYSNPSLSQSPGDSEEYFATYFNEKISIPEEEYSCFSFRKLWAFTGPGFLMSIAYLDPGNIESDLQSGAVAGFKLLWILLLATLVGLLLQRLAARLGVVTGLHLAEVCHRQYPKVPRVILWLMVELAIIGSDMQEVIGSAIAINLLSVGRIPLWGGVLITIADTFVFLFLDKYGLRKLEAFFGFLITIMALTFGYEYVTVKPSQSQVLKGMFVPSCSGCRTPQIEQAVGIVGAVIMPHNMYLHSALVKSRQVNRNNKQEVREANKYFFIESCIALFVSFIINVFVVSVFAEAFFGKTNEQVVEVCTNTSSPHAGLFPKDNSTLAVDIYKGGVVLGCYFGPAALYIWAVGILAAGQSSTMTGTYSGQFVME…
XP_008949496.1	MVLGPEQKMSDDSVSGDHGESASLGNINPAYSNPSLPQSPGDSEEYFATYFNEKISIPEEEYSCFSFRKLWAFTGPGFLMSIAYLDPGNIESDLQSGAVAGFKLLWILLLATLVGLLLQRLAARLGVVTGLHLAEVCHRQYPKVPRVILWLMVELAIIGSDMQEVIGSAIAINLLSVGRIPLWGGVLITIADTFVFLFLDKYGLRKLEAFFGFLITIMALTFGYEYVTVKPSQSQVLKGMFVPSCSGCRTPQIEQAVGIVGAVIMPHNMYLHSALVKSRQVNRNNKQEVREANKYFFIESCIALFVSFIINVFVVSVFAEAFFGKTNEQVVEVCTNTSSPHAGLFPKDNSTLAVDIYKGGVVLGCYFGPAALYIWAVGILAAGQSSTMTGTYSGQFVME…
XP_024112860.1	MVLGPEQKMSDDSVSGDHGESASLGTINPAYSNPSLPQSPGDSEEYFATYFNEKISIPEEEYSCFSFRKLWAFTGPGFLMSIAYLDPGNIESDLQSGAVAGFKLLWILLLATLVGLLLQRLAARLGVVTGLHLAEVCHRQYPKVPRVILWLMVELAIIGSDMQEVIGSAIAINLLSVGRVPLWGGVLITIADTFVFLFLDKYGLRKLEAFFGFLITIMALTFGYEYVTVKPSQSQVLKGMFVPSCSGCRTPQIEQAVGIVGAVIMPHNMYLHSALVKSRQVNRNNKQEVREANKYFFIESCIALFVSFIINVFVVSVFAEAFFGKTNEQVVEVCTNTSSPHAGLFPKDNSTLAVDIYKGGVVLGCYFGPAALYIWAVGILAAGQSSTMTGTYSGQFVME…
XP_011903674.1	MVLGLEQKMSDDSVSGDHGESACLGTVNPVSSNPSLPRSPGDSEEYFATYFNEKISIPEEEYSCFSFRKLWAFTGPGFLMSIAYLDPGNIESDLQSGAVAGFKLLWILLLATLVGLLLQRLAARLGVVTGLHLAEVCHRQYPKVPRIILWLMVELAIIGSDMQEVIGSAIAINLLSVGRIPLWGGVLITIADTFVFLFLDKYGLRKLEAFFGFLITIMALTFGYEYVTVKPSQSQVLKGMFVPSCSGCRTPQIEQAVGIVGAVIMPHNMYLHSALVKSRQVNRNNKQEVREANKYFFIESCIALFVSFIINVFVVSVFAEAFFGKTNEQVVEVCTNTSSPHAGLFPKDNSTLAVDIYKGGVVLGCYFGPAALYIWAVGILAAGQSSTMTGTYSGQFVME…
XP_008001432.1	MRKKQLKTEAAPHCELKSYSKNSATQVSTMVLGLEQKMSDDSVSGDHGESACLGTVNPVSSNPSLPRSPGDSEEYFATYFNEKISIPEEEYSCFSFRKLWAFTGPGFLMSIAYLDPGNIESDLQSGAVAGFKLLWILLLATLVGLLLQRLAARLGVVTGLHLAEVCHRQYPKVSNVLSCLSLTHAVEISVSGSILFFNVSFFSVSLTSISHLXPRVPLWGGVLITIADTFVFLFLDKYGLRKLEAFFGFLITIMALTFGYEYVTVKPSQSQVLKGMFVPSCSGCRTPQIEQAVGIVGAVIMPHNMYLHSALVKSRQVNRNNKQEVREANKYFFIESCIALFVSFIINVFVVSVFAEAFFGKTNEQVVEVCTNTSSPHAGLFPKDNSTLAVDIYKGGVVL…
AAI00015.1	MVLGPEQKMSDDSVSGDHGESASLGNINPAYSNPSLSQSPGDSEEYFATYFNEKISIPEEEYSCFSFRKLWAFTGPGFLMSIAYLDPGNIESDLQSGAVAGFKLLWILLLATLVGLLLKRLAARLGVVTGLHLAEVCHRQYPKVPRVILWLMVELAIIGSDMQEVIGSAIAINLLSVGRIPLWGGVLITIADTFVFLFLDKYGLRKLEAFFGFLITIMALTFGYEYVTVKPSQSQVLKGMFVPSCSGCRTPQIEQAVGIVGAVIMPHNMYLHSALVKSRQVNRNNKQEVREANKYFFIESCIALFVSFIINVFVVSVFAEAFFGKTNEQVVEVCTNTSSPHAGLFPKDNSTLAVDIYKGGVVLGCYFGPAALYIWAVGILAAGQSSTMTGTYSGQFVME…
EAW58162.1	MVLGPEQKMSDDSVSGDHGESASLGNINPAYSNPSLSQSPGDSEEYFATYFNEKISIPEEEYSCFSFRKLWAFTGPGFLMSIAYLDPGNIESDLQSGAVAGFKLLWILLLATLVGLLLQRLAARLGVVTGLHLAEVCHRQYPKVPRVILWLMVELAIIGSDMQEVIGSAIAINLLSVGRIPLWGGVLITIADTFVFLFLDKYGLRKLEAFFGFLITIMALTFGYEASVKPSQSQVLKGMFVPSCSGCRTPQIEQAVGIVGAVIMPHNMYLHSALVKSRQVNRNNKQEVREANKYFFIESCIALFVSFIINVFVVSVFAEAFFGKTNEQVVEVCTNTSSPHAGLFPKDNSTLAVDIYKGGVVLGCYFGPAALYIWAVGILAAGQSSTMTGTYSGQFVMEG…
XP_005268969.1	MSTVDYLNSVSGDHGESASLGNINPAYSNPSLSQSPGDSEEYFATYFNEKISIPEEEYSCFSFRKLWAFTGPGFLMSIAYLDPGNIESDLQSGAVAGFKLLWILLLATLVGLLLQRLAARLGVVTGLHLAEVCHRQYPKVPRVILWLMVELAIIGSDMQEVIGSAIAINLLSVGRIPLWGGVLITIADTFVFLFLDKYGLRKLEAFFGFLITIMALTFGYEYVTVKPSQSQVLKGMFVPSCSGCRTPQIEQAVGIVGAVIMPHNMYLHSALVKSRQVNRNNKQEVREANKYFFIESCIALFVSFIINVFVVSVFAEAFFGKTNEQVVEVCTNTSSPHAGLFPKDNSTLAVDIYKGGVVLGCYFGPAALYIWAVGILAAGQSSTMTGTYSGQFVMEGFLN…
XP_008949495.1	MSTVDSLNSVSGDHGESASLGNINPAYSNPSLPQSPGDSEEYFATYFNEKISIPEEEYSCFSFRKLWAFTGPGFLMSIAYLDPGNIESDLQSGAVAGFKLLWILLLATLVGLLLQRLAARLGVVTGLHLAEVCHRQYPKVPRVILWLMVELAIIGSDMQEVIGSAIAINLLSVGRIPLWGGVLITIADTFVFLFLDKYGLRKLEAFFGFLITIMALTFGYEYVTVKPSQSQVLKGMFVPSCSGCRTPQIEQAVGIVGAVIMPHNMYLHSALVKSRQVNRNNKQEVREANKYFFIESCIALFVSFIINVFVVSVFAEAFFGKTNEQVVEVCTNTSSPHAGLFPKDNSTLAVDIYKGGVVLGCYFGPAALYIWAVGILAAGQSSTMTGTYSGQFVMEGFLN…
XP_011727271.1	MSKDNSLNSVSGDHGESACLGTVNPVSSNPSLPRSPGDSEEYFATYFNEKISIPEEEYSCFSFRKLWAFTGPGFLMSIAYLDPGNIESDLQSGAVAGFKLLWILLLATLVGLLLQRLAARLGVVTGLHLAEVCHRQYPKVPRIILWLMVELAIIGSDMQEVIGSAIAINLLSVGRIPLWGGVLITIADTFVFLFLDKYGLRKLEAFFGFLITIMALTFGYEYVTVKPSQSQVLKGMFVPSCSGCRTPQIEQAVGIVGAVIMPHNMYLHSALVKSRQVNRNNKQEVREANKYFFIESCIALFVSFIINVFVVSVFAEAFFGKTNEQVVEVCTNTSSPHAGLFPKDNSTLAVDIYKGGVVLGCYFGPAALYIWAVGILAAGQSSTMTGTYSGQFVMEGFLN…
XP_017717026.1	MSKDNSLNSVSGDHGESACLGTVNHVYSNPSLPQSPGDSEEYFATYFNEKIAIPEEEYSCFSFRKLWAFTGPGFLMSIAYLDPGNIESDLQSGAVAGFKLLWILLLATLVGLLLQRLAARLGVVTGLHLAEVCHRQYPKVPRIILWLMVELAIIGSDMQEVIGSAIAINLLSVGRVPLWGGVLITIADTFVFLFLDKYGLRKLEAFFGFLITIMALTFGYEYVTVKPSQSQVLKGMFVPSCSGCRTSQIEQAVGIVGAVIMPHNMYLHSALVKSRQVNRNNKQEVREANKYFFIESCIALFVSFIINVFVVSVFAEAFFGKTNEQVVEVCTNTSSPHADLFPKDNSTLAVDIYKGGVVLGCYFGPAALYIWAVGILAAGQSSTMTGTYSGQFVMEGFLN…
XP_023066901.1	MVLGLEQKMSDDSVSGDHGESACLGTVNSVYGNPSLPQSPGDSEEYFATYFNEKISIPEEEYSCFSFRKLWAFTGPGFLMSIAYLDPGNIESDLQSGAVAGFKLLWILLLSTLVGLLLQRLAARLGVVTGLHLAEVCHRQYPKVPRIILWLMVELAIIGSDMQEVIGSAIAINLLSVGRIPLWGGVLITIADTFVFLFLDKYGLRKLEAFFGFLITIMALTFGYEYVTVKPSQSQVLKGMFVPSCSGCRTSQIEQAVGIVGAVIMPHNMYLHSALVKSRQVNRNNKQEVREANKYFFIESCIALFVSFIINVFVVSVFAEAFFGKTNEQVVEVCTNTSSPHADLFPKDNSTLAVDIYKGGVVLGCYFGPAALYIWAVGILAAGQSSTMTGTYSGQFVME…
NP_001271745.1	MVLGLEQKMSDDSVSGDHGESACLGTVNPVSSNPSLPRSPGDSEEYFATYFNEKISIPEEEHSCFSFRKLWAFTGPGFLMSIAYLDPGNIESDLQSGAVAGFKLLWILLLATLVGLLLQRLAARLGVVTGLHLAEVCHRQYPKVPRIILWLMVELAIIGSDMQEVIGSAIAINLLSVGRIPLWGGVLITIADTFVFLFLDKYGLRKLEAFFGFLITIMALTFGYEYVTVRPSQSQVLKGMFVPSCSGCRTPQIEQAVGIVGAVIMPHNMYLHSALVKSRQVNRNNKQEVREANKYFFIESCIALFVSFIINVFVVSVFAEAFFGKTNEQVVEVCTNTSSPHAGLFPKDNSTLAVDIYKGGVVLGCYFGPAALYIWAVGILAAGQSSTMTGTYSGQFVME…
XP_003252193.1	MVLGPEQKMSDDSVSGDHGESASLGTINPAYSNPSLPQSPGDSEEYFATYFNEKISIPEEEHSCFSFRKLWAFTGPGFLMSIAYLDPGNIESDLQSGAVAGFKLLWILLLATLVGLLLQRLAARLGVVTGLHLAEVCHRQYPKVPRIILWLMVELAIIGSDMQEVIGSAIAINLLSVGRIPLWGGVLITIADTFVFLFLDKYGLRKLEAFFGFLITIMALTFGYEYVTVKPSQSQVLKGMFVPSCSGCRTPQIEQAVGIVGAVIMPHNMYLHSALVKSRQVNRNNKQEVREANKYFFIESCIALFVSFIINVFVVSVFAEAFFGKTNEQVVEVCTNTSSPHAGLFPKDNSTLAVDIYKGGVVLGCYFGPAALYIWAVGILAAGQSSTMTGTYSGQFVME…
PNI33217.1	MVLGPEQKMSDDSVSGDHGESASLGNINPAYSNPSLPQSPGDSEEYFATYFNEKISIPEEEYSCFSFRKLWAFTGPGFLMSIAYLDPGNIESDLQSGAVAGFKLLWILLLATLVGLLLQRLAARLGVVTGLHLAEVCHRQYPKVPRVILWLMVELAIIGSDMQEVIGSAIAINLLSVGRIPLWGGVLITIADTFVFLFLDKYGLRKLEAFFGFLITIMALTFGYEYVTVKPSQSQVLKGMFVPSCSGCRTPQIEQAVGIVGAVIMPHNMYLHSALVKSRQVNRNNKQEVREANKYFFIESCIALFVSFIINVFVVSVFAEAFFGKTNEQVVEVCTNTSSPHAGLFPKDNSTLAVDIYKGGVVLGCYFGPAALYIWAVGILAAGQSSTMTGTYSGQFVME…
PNJ25645.1	MVLGPEQKMSDDSVSGDHGESASLGTINPAYSNPSLPQSPGDSEEYFATYFNEKISIPEEEYSCFSFRKLWAFTGPGFLMSIAYLDPGNIESDLQSGAVAGFKLLWILLLATLVGLLLQRLAARLGVVTGLHLAEVCHRQYPKVPRVILWLMVELAIIGSDMQEVIGSAIAINLLSVGRVPLWGGVLITIADTFVFLFLDKYGLRKLEAFFGFLITIMALTFGYEYVTVKPSQSQVLKGMFVPSCSGCRTPQIEQAVGIVGAVIMPHNMYLHSALVKSRQVNRNNKQEVREANKYFFIESCIALFVSFIINVFVVSVFAEAFFGKTNEQVVEVCTNTSSPHAGLFPKDNSTLAVDIYKGGVVLGCYFGPAALYIWAVGILAAGQSSTMTGTYSGQFVME…
BAG59096.1	MSTVDSLNSVSGDHGESASLGNINPAYSNPSLSQSPGDSEEYFATYFNEKISIPEEEYSCFSFRKLWAFTGPGFLMSIAYLDPGNIESDLQSGAVAGFKLLWILLLATLVGLLLQRLAARLGVVTGLHLAEVCHRQYPKVPRVILWLMVELAIIGSDMQEVIGSAIAINLLSVGRIPLWGGVLITIADTFVFLFLDKYGLRKLEAFFGFLITIMALTFGYEYVTVKPSQSQVLKGMFVPSCSGCRTPQIEQAVGIVGAVIMPHNMYLHSALVKSRQVNRNNKQEVREANKYFFIESCIALFVSFIINVFVVSVFAEAFFGKTNEQVVEVCTNTSSPHAGLFPKDNSTLAVDIYKGGVVLGCYFGPAALYIWAVGILAAGQSSTMTGTYSGQFVMEGFLN…
NP_001167601.1	MSTVDYLNSVSGDHGESASLGNINPAYSNPSLSQSPGDSEEYFATYFNEKISIPEEEYSCFSFRKLWAFTGPGFLMSIAYLDPGNIESDLQSGAVAGFKLLWILLLATLVGLLLQRLAARLGVVTGLHLAEVCHRQYPKVPRVILWLMVELAIIGSDMQEVIGSAIAINLLSVGRIPLWGGVLITIADTFVFLFLDKYGLRKLEAFFGFLITIMALTFGYEYVTVKPSQSQVLKGMFVPSCSGCRTPQIEQAVGIVGAVIMPHNMYLHSALVKSRQVNRNNKQEVREANKYFFIESCIALFVSFIINVFVVSVFAEAFFGKTNEQVVEVCTNTSSPHAGLFPKDNSTLAVDIYKGGVVLGCYFGPAALYIWAVGILAAGQSSTMTGTYSGQFVMEGFLN…
PNI33218.1	MSTVDSLNSVSGDHGESASLGNINPAYSNPSLPQSPGDSEEYFATYFNEKISIPEEEYSCFSFRKLWAFTGPGFLMSIAYLDPGNIESDLQSGAVAGFKLLWILLLATLVGLLLQRLAARLGVVTGLHLAEVCHRQYPKVPRVILWLMVELAIIGSDMQEVIGSAIAINLLSVGRIPLWGGVLITIADTFVFLFLDKYGLRKLEAFFGFLITIMALTFGYEYVTVKPSQSQVLKGMFVPSCSGCRTPQIEQAVGIVGAVIMPHNMYLHSALVKSRQVNRNNKQEVREANKYFFIESCIALFVSFIINVFVVSVFAEAFFGKTNEQVVEVCTNTSSPHAGLFPKDNSTLAVDIYKGGVVLGCYFGPAALYIWAVGILAAGQSSTMTGTYSGQFVMEGFLN…
PNJ25646.1	MSKVDSLNSVSGDHGESASLGTINPAYSNPSLPQSPGDSEEYFATYFNEKISIPEEEYSCFSFRKLWAFTGPGFLMSIAYLDPGNIESDLQSGAVAGFKLLWILLLATLVGLLLQRLAARLGVVTGLHLAEVCHRQYPKVPRVILWLMVELAIIGSDMQEVIGSAIAINLLSVGRVPLWGGVLITIADTFVFLFLDKYGLRKLEAFFGFLITIMALTFGYEYVTVKPSQSQVLKGMFVPSCSGCRTPQIEQAVGIVGAVIMPHNMYLHSALVKSRQVNRNNKQEVREANKYFFIESCIALFVSFIINVFVVSVFAEAFFGKTNEQVVEVCTNTSSPHAGLFPKDNSTLAVDIYKGGVVLGCYFGPAALYIWAVGILAAGQSSTMTGTYSGQFVMEGFLN…
XP_030672418.1	MVLGPEQKMSDDSVSGDHGESASLGTINPAYSNPSLPQSPGDSEEYFATYFNEKISIPEEEHSCFSFRKLWAFTGPGFLMSIAYLDPGNIESDLQSGAVAGFKLLWILLLATLVGLLLQRLAARLGVVTGLHLAEVCHRQYPKVPRIILWLMVELAIIGSDMQEVIGSAIAINLLSVGRIPLWGGVLITIADTFVFLFLDKYGLRKLEAFFGFLITIMALTFGYEYVTVKPSQSQVLKGMFVPSCSGCRTPQIEQAVGIVGAVIMPHNMYLHSALVKSRQVNRNNKQEVREANKYFFIESCIALFVSFIINVFVVSVFAEAFFGKTNEQVVEVCTNTSSPHAGLFPKDNSTLAVDIYKGGVVLGCYFGPAALYIWAVGILAAGQSSTMTGTYSGQFVME…
XP_011903675.1	MRKKQLKTEAAPHCELKSYSKNSATQVSTMVLGLEQKMSDDSVSGDHGESACLGTVNPVSSNPSLPRSPGDSEEYFATYFNEKISIPEEEYSCFSFRKLWAFTGPGFLMSIAYLDPGNIESDLQSGAVAGFKLLWILLLATLVGLLLQRLAARLGVVTGLHLAEVCHRQYPKVPRIILWLMVELAIIGSDMQEVIGSAIAINLLSVGRIPLWGGVLITIADTFVFLFLDKYGLRKLEAFFGFLITIMALTFGYEYVTVKPSQSQVLKGMFVPSCSGCRTPQIEQAVGIVGAVIMPHNMYLHSALVKVEVCTNTSSPHAGLFPKDNSTLAVDIYKGGVVLGCYFGPAALYIWAVGILAAGQSSTMTGTYSGQFVMEGFLNLKWSRFARVILTRSIAIIPT…
XP_008988699.2	MRKKQLKMEAAPHCELTSYSKNSGTQLSTMVLGPEQKMSDGSVSGEHDESASLGTFNPACSNPSLPQSSGNSEDEFTTYFNEKISIPEEEYSCFSFRKLWAFTGPGFLMSIAYLDPGNIESDLQSGAVAGFKLLWILLLATLVGLLLQRLAARLGVVTGLHLAEVCHRQYPKVPRIILWLMVELAIIGSDMQEVIGSAIAINLLSVGRIPLWGGVLITIADTFVFLFLDKYGLRKLEAFFGFLITIMALTFGYEYVTVKPSQSQVLKGMFVPSCSGCSTPQIEQAVGIVGAVIMPHNMYLHSALVKSRQINRSNKQEIREANKYFFIESCIALFVSFIINVFVVSVFAEAFFGKTNEQVVEVCTNSSSPHAGLFPNDNSTLAVDIYKGGVVLGCYFGPA…
XP_017824507.1	MRKKQLKMEAAPHCELTSYSKNSGTQLSTMVLGPEQKMSDGSVSGEHDESASLGTFNPACSNPSLPQSSGNSEDEFTTYFNEKISIPEEEYSCFSFRKLWAFTGPGFLMSIAYLDPGNIESDLQSGAVAGFKLLWILLLATLVGLLLQRLAARLGVVTGLHLAEVCHRQYPKVPRIILWLMVELAIIGSDMQEVIGSAIAINLLSVGRIPLWGGVLITIADTFVFLFLDKYGLRKLEAFFGFLITIMALTFGYEYVTVKPSQSQVLKGMFVPSCSGCSTPQIEQAVGIVGAVIMPHNMYLHSALVKSRQINRSNKQEIREANKYFFIESCIALFVSFIINVFVVSVFAEAFFGKTNEQVVEVCTNSSSPHAGLFPNDNSTLAVDIYKGGVVLGCYFGPA…
XP_017831547.1	MRKKQLKMEAAPHCELTSYSKNSGTQLSTMVLGPEQKMSDGSVSGEHDESASLGTFNPACSNPSLPQSSGNSEDEFTTYFNEKISIPEEEYSCFSFRKLWAFTGPGFLMSIAYLDPGNIESDLQSGAVAGFKLLWILLLATLVGLLLQRLAARLGVVTGLHLAEVCHRQYPKVPRIILWLMVELALIGSDMQEVIGSAIAINLLSVERIPLWGGVLITIAGLRKLEAFFGFLITIMALTFGYEYVTVKPSQSQVLKGMFVPSCSGCSTPQIEQAVGIVGAVMTPHNMYLHSALVKSRQINRSNKQEIREANKYFFIESCIAVFVSFIINVFVVSVFAEAFFGKTNEQVVEVCTNSSSPHAGLFPNGNSTLAVDIYKGGVVLGCYFGPAALYIWAVGILA…
XP_012296801.1	MVLGPEQKMSDDSVSGEHGESASLGTFNPAYSNPSLPQPSGNSEDEFTTYFNEKISIPEEEYSCFSFRKLWAFTGPGFLMSIAYLDPGNIESDLQSGAVAGFKLLWILLLATLVGLLLQRLAARLGVVTGLHLAEVCHHQYPKVPRIILWLMVELAIIGSDMQEVIGSAIAINLLSVGRIPLWGGVLITIADTFVFLFLDKYGLRKLEAFFGFLITIMALTFGYEYVTVKPSQSQVLKGMFVPSCSGCRTPQIEQAVGIVGAVIMPHNMYLHSALVKSRQINRSNKQEIREANKYFFIESCIALFVSFIINVFVVSVFAEAFFGKTNEQVVEVCTNSSSPHAGLFPNDNSTLAVDIYKGGVVLGCYFGPAALYIWAVGILAAGQSSTMTGTYSGQFVME…
XP_012296799.1	MCGCCPVGQSRGGEGVGQLALAPGTWSLRRGDCVSGGCRAASYSKNSGTQLSTMVLGPEQKMSDDSVSGEHGESASLGTFNPAYSNPSLPQPSGNSEDEFTTYFNEKISIPEEEYSCFSFRKLWAFTGPGFLMSIAYLDPGNIESDLQSGAVAGFKLLWILLLATLVGLLLQRLAARLGVVTGLHLAEVCHHQYPKVPRIILWLMVELAIIGSDMQEVIGSAIAINLLSVGRIPLWGGVLITIADTFVFLFLDKYGLRKLEAFFGFLITIMALTFGYEYVTVKPSQSQVLKGMFVPSCSGCRTPQIEQAVGIVGAVIMPHNMYLHSALVKSRQINRSNKQEIREANKYFFIESCIALFVSFIINVFVVSVFAEAFFGKTNEQVVEVCTNSSSPHAGLFP…
XP_017824508.1	MRKKQLKMEAAPHCELTSYSKNSGTQLSTMVLGPEQKMSDGSVSGEHDESASLGTFNPACSNPSLPQSSGNSEDEFTTYFNEKISIPEEEYSCFSFRKLWAFTGPGFLMSIAYLDPGNIESDLQSGAVAGFKLLWILLLATLVGLLLQRLAARLGVVTGLHLAEVCHRQYPKVPRIILWLMVELAIIGSDMQEVIGSAIAINLLSVGRIPLWGGVLITIADTFVFLFLDKYGLRKLEAFFGFLITIMALTFGYEYVTVKPSQSQVLKGMFVPSCSGCSTPQIEQAVGIVGAVIMPHNMYLHSALVKVEVCTNSSSPHAGLFPNDNSTLAVDIYKGGVVLGCYFGPAALYIWAVGILAAGQSSTMTGTYSGQFVMEGFLNLKWSRFARVVLTRSIAIIPT…
XP_021562685.1	MGKKQVKTEAAPHCELKSYSKNSGTQVSTMVLGPEQKMSDDSASGDHGETASLGTLNPAFSNSSLPQSSGHSEEHFATYFNEKISIPEEEHSCFSFRKLWAFTGPGFLMSIAYLDPGNIESDLQSGAVAGFKLLWVLLLATIVGLLLQRLAARLGVVTGLHLAEVCHRQYPKVPRIILWLMVELAIIGSDMQEVIGSAIAINLLSVGRVPLWGGVLITIADTFVFLFLDKYGLRKLEAFFGFLITIMALTFGYEYVTVRPSQSQVLRGMFVPSCSGCRTPQIEQAVGIVGAVIMPHNMYLHSALVKSRQVNRANKHEVREANKYFFIESCIALFVSFIINVFVVSVFGEAFFGKTNKQVVEVCTNSSSPHAGLFPNDNSTLAVDIYKGGVVLGCYFGPA…
XP_008072287.1	MGKKQVKTEAAPHCELKSYSKNSGTQVSTMVLGPEQKMSDDSASGDHGETASLGTLNPAFSNSSLPQSSGHSEEHFATYFNEKISIPEEEHSCFSFRKLWAFTGPGFLMSIAYLDPGNIESDLQSGAVAGFKLLWVLLLATIVGLLLQRLAARLGVVTGLHLAEVCHRQYPKVPRIILWLMVELAIIGSDMQEVIGSAIAINLLSVGRVPLWGGVLITIADTFVFLFLDKYGLRKLEAFFGFLITIMALTFGYEYVTVRPSQSQVLRGMFVPSCSGCRTPQIEQAVGIVGAVIMPHNMYLHSALVKSRQVNRANKHEVREANKYFFIESCIALFVSFIINVFVVSVFGEAFFGKTNKQVVEVCTNSSSPHAGLFPNDNSTLAVDIYKGGVVLGCYFGPA…
XP_008072289.1	MVLGPEQKMSDDSASGDHGETASLGTLNPAFSNSSLPQSSGHSEEHFATYFNEKISIPEEEHSCFSFRKLWAFTGPGFLMSIAYLDPGNIESDLQSGAVAGFKLLWVLLLATIVGLLLQRLAARLGVVTGLHLAEVCHRQYPKVPRIILWLMVELAIIGSDMQEVIGSAIAINLLSVGRVPLWGGVLITIADTFVFLFLDKYGLRKLEAFFGFLITIMALTFGYEYVTVRPSQSQVLRGMFVPSCSGCRTPQIEQAVGIVGAVIMPHNMYLHSALVKSRQVNRANKHEVREANKYFFIESCIALFVSFIINVFVVSVFGEAFFGKTNKQVVEVCTNSSSPHAGLFPNDNSTLAVDIYKGGVVLGCYFGPAALYIWAVGILAAGQSSTMTGTYSGQFVME…
XP_030794948.1	MSPGDSEEYFATYFNEKIAIPEEEYSCFSFRKLWAFTGPGFLMSIAYLDPGNIESDLQSGAVAGFKLLWILLLATLVGLLLQRLAARLGVVTGLHLAEVCHRQYPKVPRIILWLMVELAIIGSDMQEVIGSAIAINLLSVGRVPLWGGVLITIADTFVFLFLDKYGLRKLEAFFGFLITIMALTFGYEYVTVKPSQSQVLKGMFVPSCSGCRTSQIEQAVGIVGAVIMPHNMYLHSALVKSRQVNRNNKQEVREANKYFFIESCIALFVSFIINVFVVSVFAEAFFGKTNEQVVEVCTNTSSPHADLFPKDNSTLAVDIYKGGVVLGCYFGPAALYIWAVGILAAGQSSTMTGTYSGQFVMEGFLNLKWSRFARVILTRSIAIIPTLLVAVFQDVEHLT…
XP_023066902.1	MVLGLEQKMSDDSVSGDHGESACLGTVNSVYGNPSLPQSPGDSEEYFATYFNEKISIPEEEYSCFSFRKLWAFTGPGFLMSIAYLDPGNIESDLQSGAVAGFKLLWILLLSTLVGLLLQRLAARLGVVTGLHLAEVCHRQYPKVPRIILWLMVELAIIGSDMQEVIGSAIAINLLSVGRIPLWGGVLITIADTFVFLFLDKYGLRKLEAFFGFLITIMALTFGYEYVTVKPSQSQVLKGMFVPSCSGCRTSQIEQAVGIVGAVIMPHNMYLHSALVKSRQVNRNNKQEVREANKYFFIESCIALFVSFIINVFVVSVFAEAFFGKTNEQVVEVCTNTSSPHADLFPKDNSTLAVDIYKGGFLNLKWSRFARVILTRSIAIIPTLLVAVFQDVEHLTGMN…
BAA34374.1	MVLGPEQKMSDDSVSGDHGESASLGNINPAYSNPSLSQSPGDSEEYFATYFNEKISIPEEEYSCFSFRKLWAFTGPGFLMSIAYLDPGNIESDLQSGAVAGFKLLWILLLATLVGLLLQRLAARLGVVTGLHLAEVCHRQYPKVPRVILWLMVELAIIGSDMQEVIGSAIAINLLSVGRIPLWGGVLITIADTFVFLFLDKYGLRKLEAFFGFLITIMALTFGYEYVTVKPSQSQVLKGMFVPSCSGCRTPQIEQAVGIVGAVIMPHNMYLHSALVKSRQVNRNNKQEVREANKYFFIESCIALFVSFIINVFVVSVFAEAFFGKTNEQVVEVCTNTSSPHAGLFPKDNSTLAVDIYKGGVVLGCYFGPAALYIWAVGILAAGQSSTMTGTYSGQFVME…
EAW58163.1	MVLGPEQKMSDDSVSGDHGESASLGNINPAYSNPSLSQSPGDSEEYFATYFNEKISIPEEEYSCFSFRKLWAFTGPGFLMSIAYLDPGNIESDLQSGAVAGFKLLWILLLATLVGLLLQRLAARLGVVTGLHLAEVCHRQYPKVPRVILWLMVELAIIGSDMQEVIGSAIAINLLSVGRIPLWGGVLITIADTFVFLFLDKYGLRKLEAFFGFLITIMALTFGYEASVKPSQSQVLKGMFVPSCSGCRTPQIEQAVGIVGAVIMPHNMYLHSALVKSRQVNRNNKQEVREANKYFFIESCIALFVSFIINVFVVSVFAEAFFGKTNEQVVEVCTNTSSPHAGLFPKDNSTLAVDIYKGGVVLGCYFGPAALYIWAVGILAAGQSSTMTGTYSGQFVMEG…
XP_012509005.1	MVLGPEQKMSDENASGDHGDTASLGAFNPAYSNSSLPQSTEHSEEPFATYFDEKVAIPEEEYSCFSFRKLWAFTGPGFLMSIAYLDPGNIEADLQSGAVAGFQLLWVLLLATIVGLLLQRLAVRLGVVTGLHLAEVCHHRYPKVPRIILWLMVELAIIGSDMQEVIGSAIAINLLSLGRIPLWGGVLITIADTFVFLFLDKYGLRKLEAFFGFLITVMALTFGYEYVTVKPSQSQVLKGMFVPSCSGCHTPQIEQAVGIVGAVIMPHNMYLHSALVKSRQVNRNNKQEVREANKYFFIESCIALFVSFIINVFVVSVFAEAFFEKTNEQVVEVCQNSSSPHAGLFPNDNSTLAVDIYKGGIVLGCYFGPATLYIWAVGILAAGQSSTMTGTYSGQFVME…
XP_012508989.1	MVLGPEQKMSDENASGDHGDTASLGAFNPAYSNSSLPQSTEHSEEPFATYFDEKVAIPEEEYSCFSFRKLWAFTGPGFLMSIAYLDPGNIEADLQSGAVAGFQLLWVLLLATIVGLLLQRLAVRLGVVTGLHLAEVCHHRYPKVPRIILWLMVELAIIGSDMQEVIGSAIAINLLSLGRIPLWGGVLITIADTFVFLFLDKYGLRKLEAFFGFLITVMALTFGYEYVTVKPSQSQVLKGMFVPSCSGCHTPQIEQAVGIVGAVIMPHNMYLHSALVKSRQVNRNNKQEVREANKYFFIESCIALFVSFIINVFVVSVFAEAFFEKTNEQVVEVCQNSSSPHAGLFPNDNSTLAVDIYKGGIVLGCYFGPATLYIWAVGILAAGQSSTMTGTYSGQFVME…
XP_012617802.2	MPPYQWSESYSKNSGTQVSTMVLGPEQKMSDENASGDHGDTASLGALNPAYSNSSLPQSTEHSEEPFATYFNEKITIPEEEYSCFSFRKLWAFTGPGFLMSIAYLDPGNIESDLQSGAVAGFKLLWVLLLATVVGLLLQRLAARLGVVTGLHLAEVCHRQYPKVPRIILWLMVELAIIGSDMQEVIGSAIAINLLSLGRVPLWGGVLITIADTFVFLFLDKYGLRKLEAFFGFLITVMALTFGYEYVTVKPSQSQVLKGMFVPSCSGCRTPQIEQAVGIVGAVIMPHNVYLHSALVKSRQVNRNNKQEVREANKYFFIESCIALFVSFVINVFVVSVFAEAFFEKTNEQVVEVCQNSSSPHAGLFPNDNSTLAVDIYKGGIVLGCYFGPAALYIWAVGI…
XP_020143041.1	MVLGPEQKMSDENASGDHGDTASLGALNPAYSNSSLPQSTEHSEEPFATYFNEKITIPEEEYSCFSFRKLWAFTGPGFLMSIAYLDPGNIESDLQSGAVAGFKLLWVLLLATVVGLLLQRLAARLGVVTGLHLAEVCHRQYPKVPRIILWLMVELAIIGSDMQEVIGSAIAINLLSLGRVPLWGGVLITIADTFVFLFLDKYGLRKLEAFFGFLITVMALTFGYEYVTVKPSQSQVLKGMFVPSCSGCRTPQIEQAVGIVGAVIMPHNVYLHSALVKSRQVNRNNKQEVREANKYFFIESCIALFVSFVINVFVVSVFAEAFFEKTNEQVVEVCQNSSSPHAGLFPNDNSTLAVDIYKGGIVLGCYFGPAALYIWAVGILAAGQSSTMTGTYSGQFVME…
XP_023369364.1	MRKKEAKMDAAPQCELKSYSKNSGTQVSTMVLGREQKMSDDNASGDHASLGALNPAYSNSSLPQSNEHSEEPFATYFNEKISVPEEEYSCFSFRKLWAFTGPGFLMSIAYLDPGNIESDLQSGAVAGFKLLWVLLLATIVGLLLQRLAARLGVVTGLHLAEVCHRQYPKVPRIILWLMVELAIIGSDMQEVIGSAIAINLLSMGRVPLWGGVLITIADTFVFLFLDKYGLRKLEAFFGFLITVMALTFGYEYVTVKPNQSQVLQGMFVPSCSGCQTSQVQQAVGIVGAVIMPHNMYLHSALVKSRQVNRSNKREVREANKYFFIESCIALFVSFIINVFVVSVFAEAFFEKTNEQVVEVCKNSSSPHAGLFPNDNSTLAVDIYKGGVVLGCYFGPAALY…
XP_023369365.1	MDLQKSYSKNSGTQVSTMVLGREQKMSDDNASGDHASLGALNPAYSNSSLPQSNEHSEEPFATYFNEKISVPEEEYSCFSFRKLWAFTGPGFLMSIAYLDPGNIESDLQSGAVAGFKLLWVLLLATIVGLLLQRLAARLGVVTGLHLAEVCHRQYPKVPRIILWLMVELAIIGSDMQEVIGSAIAINLLSMGRVPLWGGVLITIADTFVFLFLDKYGLRKLEAFFGFLITVMALTFGYEYVTVKPNQSQVLQGMFVPSCSGCQTSQVQQAVGIVGAVIMPHNMYLHSALVKSRQVNRSNKREVREANKYFFIESCIALFVSFIINVFVVSVFAEAFFEKTNEQVVEVCKNSSSPHAGLFPNDNSTLAVDIYKGGVVLGCYFGPAALYIWAVGILAAGQS…
XP_012661097.1	MVLGREQKMSDDNASGDHASLGALNPAYSNSSLPQSNEHSEEPFATYFNEKISVPEEEYSCFSFRKLWAFTGPGFLMSIAYLDPGNIESDLQSGAVAGFKLLWVLLLATIVGLLLQRLAARLGVVTGLHLAEVCHRQYPKVPRIILWLMVELAIIGSDMQEVIGSAIAINLLSMGRVPLWGGVLITIADTFVFLFLDKYGLRKLEAFFGFLITVMALTFGYEYVTVKPNQSQVLQGMFVPSCSGCQTSQVQQAVGIVGAVIMPHNMYLHSALVKSRQVNRSNKREVREANKYFFIESCIALFVSFIINVFVVSVFAEAFFEKTNEQVVEVCKNSSSPHAGLFPNDNSTLAVDIYKGGVVLGCYFGPAALYIWAVGILAAGQSSTMTGTYSGQFVMEGFL…
XP_019816126.1	MKKQLKEDAPQCELKSFSKNSGTQVSTMVLGPEQKIPDEDASGDHGDSASLGAINPAYSNSSIPQSPGAGSEDPFTTYFDEKIAIPEEEYSCFSFRKLWAFTGPGFLMSIAYLDPGNIESDLQSGAVAGFKLLWVLLLATIVGLLLQRLAARLGVVTGLHLAEVCHRQYPRVPRIILWLMVELAIIGSDMQEVIGSAIAINLLSVGRIPLWGGVLITIADTFVFLFLDKYGLRKLEAFFGFLITIMALTFGYEYVTVKPSQTQVLKGMFLPSCSGCRTPQIEQAVGIVGAVIMPHNMYLHSALVKSRQVDRANKQEVREANKYFFIESCIALFVSFIINVFVVSVFAEAFFGKTNEQVVAVCTNSSSPHTHLFPDDNSTLAVDIYKGGVVLGCYFGPAA…
XP_027398664.1	MKKQLKEDAPQCELKSFSKNSGTQVSTMVLGPEQKIPDEDASGDHGDSASLGAINPAYSNSSIPQSPGAGSEDPFTTYFDEKIAIPEEEYSCFSFRKLWAFTGPGFLMSIAYLDPGNIESDLQSGAVAGFKLLWVLLLATIVGLLLQRLAARLGVVTGLHLAEVCHRQYPRVPRIILWLMVELAIIGSDMQEVIGSAIAINLLSVGRIPLWGGVLITIADTFVFLFLDKYGLRKLEAFFGFLITIMALTFGYEYVTVKPSQTQVLKGMFLPSCSGCRTPQIEQAVGIVGAVIMPHNMYLHSALVKSRQVDRANKQEVREANKYFFIESCIALFVSFIINVFVVSVFAEAFFGKTNEQVVAACTNSSSPHTHLFPDDNSTLAVDIYKGGVVLGCYFGPAA…
XP_019816127.1	MKKQLKEDAPQCELKSFSKNSGTQVSTMVLGPEQKIPDDASGDHGDSASLGAINPAYSNSSIPQSPGAGSEDPFTTYFDEKIAIPEEEYSCFSFRKLWAFTGPGFLMSIAYLDPGNIESDLQSGAVAGFKLLWVLLLATIVGLLLQRLAARLGVVTGLHLAEVCHRQYPRVPRIILWLMVELAIIGSDMQEVIGSAIAINLLSVGRIPLWGGVLITIADTFVFLFLDKYGLRKLEAFFGFLITIMALTFGYEYVTVKPSQTQVLKGMFLPSCSGCRTPQIEQAVGIVGAVIMPHNMYLHSALVKSRQVDRANKQEVREANKYFFIESCIALFVSFIINVFVVSVFAEAFFGKTNEQVVAVCTNSSSPHTHLFPDDNSTLAVDIYKGGVVLGCYFGPAAL…
XP_027398667.1	MKKQLKEDAPQCELKSFSKNSGTQVSTMVLGPEQKIPDDASGDHGDSASLGAINPAYSNSSIPQSPGAGSEDPFTTYFDEKIAIPEEEYSCFSFRKLWAFTGPGFLMSIAYLDPGNIESDLQSGAVAGFKLLWVLLLATIVGLLLQRLAARLGVVTGLHLAEVCHRQYPRVPRIILWLMVELAIIGSDMQEVIGSAIAINLLSVGRIPLWGGVLITIADTFVFLFLDKYGLRKLEAFFGFLITIMALTFGYEYVTVKPSQTQVLKGMFLPSCSGCRTPQIEQAVGIVGAVIMPHNMYLHSALVKSRQVDRANKQEVREANKYFFIESCIALFVSFIINVFVVSVFAEAFFGKTNEQVVAACTNSSSPHTHLFPDDNSTLAVDIYKGGVVLGCYFGPAAL…
XP_005680019.1	MKKQLKEEAAPQCELKSFSKNSGTQVSTMVLGPEQKIPDEDASGDHGDSASLGAINPAYSNSSIPQSPGAGSEDPFTTYFNEKIAIPEEEYSCFSFRKLWAFTGPGFLMSIAYLDPGNIESDLQSGAVAGFKLLWVLLLATIVGLLLQRLAARLGVVTGLHLAEVCHRQYPRVPRIILWLMVELAIIGSDMQEVIGSAIAINLLSVGRIPLWGGVLITIADTFVFLFLDKYGLRKLEAFFGFLITIMALTFGYEYVTVKPSQTQVLKGMFLPSCSGCRTPQIEQAVGIVGAVIMPHNMYLHSALVKSRQVDRASKQEVREANKYFFIESCIALFVSFIINVFVVSVFAEAFFGKTNEQVVAVCKNSSSPHTHLFPEDNSTLAVDIYKGGVVLGCYFGPA…
XP_017903253.1	MKKQLKEEAAPQCELKSFSKNSGTQVSTMVLGPEQKIPDDASGDHGDSASLGAINPAYSNSSIPQSPGAGSEDPFTTYFNEKIAIPEEEYSCFSFRKLWAFTGPGFLMSIAYLDPGNIESDLQSGAVAGFKLLWVLLLATIVGLLLQRLAARLGVVTGLHLAEVCHRQYPRVPRIILWLMVELAIIGSDMQEVIGSAIAINLLSVGRIPLWGGVLITIADTFVFLFLDKYGLRKLEAFFGFLITIMALTFGYEYVTVKPSQTQVLKGMFLPSCSGCRTPQIEQAVGIVGAVIMPHNMYLHSALVKSRQVDRASKQEVREANKYFFIESCIALFVSFIINVFVVSVFAEAFFGKTNEQVVAVCKNSSSPHTHLFPEDNSTLAVDIYKGGVVLGCYFGPAA…
XP_027823124.1	MKKQLKEEAAPQCELKSFSKNSGTQVSTMVLGPEQKIPDEDASGDHGDSASLGAINPAYSNSSIPQSPGAGSEDPFTTYFNEKIAIPEEEYSCFSFRKLWAFTGPGFLMSIAYLDPGNIESDLQSGAVAGFKLLWVLLLATIVGLLLQRLAARLGVVTGLHLAEVCHRQYPRVPRIILWLMVELAIIGSDMQEVIGSAIAINLLSVGRIPLWGGVLITIADTFVFLFLDKYGLRKLEAFFGFLITIMALTFGYEYVTVKPSQTQVLKGMFLPSCSGCRTPQIEQAVGIVGAVIMPHNMYLHSALVKSRQVDRASKQEVREANKYFFIESCIALFVSFIINVFVVSVFAEAFFGKTNEQVVAVCKNSSSPHTHLFPEDNSTLAVDIYKGGVVLGCYFGPA…
XP_027823125.1	MKKQLKEEAAPQCELKSFSKNSGTQVSTMVLGPEQKIPDDASGDHGDSASLGAINPAYSNSSIPQSPGAGSEDPFTTYFNEKIAIPEEEYSCFSFRKLWAFTGPGFLMSIAYLDPGNIESDLQSGAVAGFKLLWVLLLATIVGLLLQRLAARLGVVTGLHLAEVCHRQYPRVPRIILWLMVELAIIGSDMQEVIGSAIAINLLSVGRIPLWGGVLITIADTFVFLFLDKYGLRKLEAFFGFLITIMALTFGYEYVTVKPSQTQVLKGMFLPSCSGCRTPQIEQAVGIVGAVIMPHNMYLHSALVKSRQVDRASKQEVREANKYFFIESCIALFVSFIINVFVVSVFAEAFFGKTNEQVVAVCKNSSSPHTHLFPEDNSTLAVDIYKGGVVLGCYFGPAA…
XP_019816128.1	MVLGPEQKIPDEDASGDHGDSASLGAINPAYSNSSIPQSPGAGSEDPFTTYFDEKIAIPEEEYSCFSFRKLWAFTGPGFLMSIAYLDPGNIESDLQSGAVAGFKLLWVLLLATIVGLLLQRLAARLGVVTGLHLAEVCHRQYPRVPRIILWLMVELAIIGSDMQEVIGSAIAINLLSVGRIPLWGGVLITIADTFVFLFLDKYGLRKLEAFFGFLITIMALTFGYEYVTVKPSQTQVLKGMFLPSCSGCRTPQIEQAVGIVGAVIMPHNMYLHSALVKSRQVDRANKQEVREANKYFFIESCIALFVSFIINVFVVSVFAEAFFGKTNEQVVAVCTNSSSPHTHLFPDDNSTLAVDIYKGGVVLGCYFGPAALYIWAVGILAAGQSSTMTGTYSGQFVM…
XP_024847550.1	MKKQLKEDAPQCELKSFSKNSGTQVSTMVLGPEQKIPDEDASGDHGDSASLGAINPAYSNSSIPQSPGAGSEDPFTTYFDEKIAIPEEEYSCFSFRKLWAFTGPGFLMSIAYLDPGNIESDLQSGAVAGFKLLWVLLLATIVGLLLQRLAARLGVVTGLHLAEVCHRQYPRVPRIILWLMVELAIIGSDMQEVIGSAIAINLLSVGRIPLWGGVLITIADTFVFLFLDKYGLRKLEAFFGFLITIMALTFGYEYVTVKPSQTQVLKGMFLPSCSGCRTPQIEQAVGIVGAVIMPHNMYLHSALVKSRQVDRANKQEVREANKYFFIESCIALFVSFIINVFVVSVFAEAFFGKTNEQVVAVCTNSSSPHTHLFPDDNSTLAVDIYKGGVVLGCYFGPAA…
ELR46907.1	MKKQLKEDAPQCELKSFSKNSGTQVSTMVLGPEQKIPDEDASGDHGDSASLGAINPAYSSSSIPQSPGAGSEDPFTTYFDEKIAIPEEEYSCFSFRKLWAFTGPGFLMSIAYLDPGNIESDLQSGAVAGFKLLWVLLLATIVGLLLQRLAARLGVVTGLHLAEVCHRQYPRVPRIILWLMVELAIIGSDMQEVIGSAIAINLLSVGRIPLWGGVLITIADTFVFLFLDKYGLRKLEAFFGFLITIMALTFGYEAMKPSQTQVLKGMFLPSCSGCRTPQTEQAVGIVGAVIMPHNMYLHSALVKSRQVDRANKQEVREANKYFFIESCIALFVSFIINVFVVSVFAEAFFGKTNEQVVAVCTNSSSPHTHLFPDDNSTLAVDIYKGGVVLGCYFGPAALY…
XP_017903255.1	MVLGPEQKIPDEDASGDHGDSASLGAINPAYSNSSIPQSPGAGSEDPFTTYFNEKIAIPEEEYSCFSFRKLWAFTGPGFLMSIAYLDPGNIESDLQSGAVAGFKLLWVLLLATIVGLLLQRLAARLGVVTGLHLAEVCHRQYPRVPRIILWLMVELAIIGSDMQEVIGSAIAINLLSVGRIPLWGGVLITIADTFVFLFLDKYGLRKLEAFFGFLITIMALTFGYEYVTVKPSQTQVLKGMFLPSCSGCRTPQIEQAVGIVGAVIMPHNMYLHSALVKSRQVDRASKQEVREANKYFFIESCIALFVSFIINVFVVSVFAEAFFGKTNEQVVAVCKNSSSPHTHLFPEDNSTLAVDIYKGGVVLGCYFGPAALYIWAVGILAAGQSSTMTGTYSGQFVM…
XP_020748667.1	MKKQSKKEAAPQCELKSFSKNSGTQVSTMVLGPEQKIPDEDASGDHGDSASLGAINPAYSNASIPQSPGAGSADPFTTYFDEKIAIPEEEYSCFSFRKLWAFTGPGFLMSIAYLDPGNIESDLQSGAVAGFKLLWVLLLATIVGLLLQRLAARLGVVTGLHLAEVCHRQYPRVPRIILWLMVELAIIGSDMQEVIGSAIAINLLSLGRVPLWGGVLITIADTFVFLFLDKYGLRKLEAFFGFLITIMALTFGYEYVTVKPSQTQVLKGMFLPSCSGCRTPQIEQAVGIVGAVIMPHNMYLHSALVKSRQVDRASKQEVREANKYFFIESCIALFVSFIINVFVVSVFAEAFFGKTNEQVVAVCKNSSSPHTHLFPEDNSTLAVDIYKGGVVLGCYFGPA…
XP_020748668.1	MKKQSKKEAAPQCELKSFSKNSGTQVSTMVLGPEQKIPDDASGDHGDSASLGAINPAYSNASIPQSPGAGSADPFTTYFDEKIAIPEEEYSCFSFRKLWAFTGPGFLMSIAYLDPGNIESDLQSGAVAGFKLLWVLLLATIVGLLLQRLAARLGVVTGLHLAEVCHRQYPRVPRIILWLMVELAIIGSDMQEVIGSAIAINLLSLGRVPLWGGVLITIADTFVFLFLDKYGLRKLEAFFGFLITIMALTFGYEYVTVKPSQTQVLKGMFLPSCSGCRTPQIEQAVGIVGAVIMPHNMYLHSALVKSRQVDRASKQEVREANKYFFIESCIALFVSFIINVFVVSVFAEAFFGKTNEQVVAVCKNSSSPHTHLFPEDNSTLAVDIYKGGVVLGCYFGPAA…
XP_027398666.1	MVLGPEQKIPDEDASGDHGDSASLGAINPAYSNSSIPQSPGAGSEDPFTTYFDEKIAIPEEEYSCFSFRKLWAFTGPGFLMSIAYLDPGNIESDLQSGAVAGFKLLWVLLLATIVGLLLQRLAARLGVVTGLHLAEVCHRQYPRVPRIILWLMVELAIIGSDMQEVIGSAIAINLLSVGRIPLWGGVLITIADTFVFLFLDKYGLRKLEAFFGFLITIMALTFGYEYVTVKPSQTQVLKGMFLPSCSGCRTPQIEQAVGIVGAVIMPHNMYLHSALVKSRQVDRANKQEVREANKYFFIESCIALFVSFIINVFVVSVFAEAFFGKTNEQVVAACTNSSSPHTHLFPDDNSTLAVDIYKGGVVLGCYFGPAALYIWAVGILAAGQSSTMTGTYSGQFVM…
XP_019816131.1	MVLGPEQKIPDDASGDHGDSASLGAINPAYSNSSIPQSPGAGSEDPFTTYFDEKIAIPEEEYSCFSFRKLWAFTGPGFLMSIAYLDPGNIESDLQSGAVAGFKLLWVLLLATIVGLLLQRLAARLGVVTGLHLAEVCHRQYPRVPRIILWLMVELAIIGSDMQEVIGSAIAINLLSVGRIPLWGGVLITIADTFVFLFLDKYGLRKLEAFFGFLITIMALTFGYEYVTVKPSQTQVLKGMFLPSCSGCRTPQIEQAVGIVGAVIMPHNMYLHSALVKSRQVDRANKQEVREANKYFFIESCIALFVSFIINVFVVSVFAEAFFGKTNEQVVAVCTNSSSPHTHLFPDDNSTLAVDIYKGGVVLGCYFGPAALYIWAVGILAAGQSSTMTGTYSGQFVME…
XP_027823126.1	MVLGPEQKIPDEDASGDHGDSASLGAINPAYSNSSIPQSPGAGSEDPFTTYFNEKIAIPEEEYSCFSFRKLWAFTGPGFLMSIAYLDPGNIESDLQSGAVAGFKLLWVLLLATIVGLLLQRLAARLGVVTGLHLAEVCHRQYPRVPRIILWLMVELAIIGSDMQEVIGSAIAINLLSVGRIPLWGGVLITIADTFVFLFLDKYGLRKLEAFFGFLITIMALTFGYEYVTVKPSQTQVLKGMFLPSCSGCRTPQIEQAVGIVGAVIMPHNMYLHSALVKSRQVDRASKQEVREANKYFFIESCIALFVSFIINVFVVSVFAEAFFGKTNEQVVAVCKNSSSPHTHLFPEDNSTLAVDIYKGGVVLGCYFGPAALYIWAVGILAAGQSSTMTGTYSGQFVM…
XP_017903257.1	MVLGPEQKIPDDASGDHGDSASLGAINPAYSNSSIPQSPGAGSEDPFTTYFNEKIAIPEEEYSCFSFRKLWAFTGPGFLMSIAYLDPGNIESDLQSGAVAGFKLLWVLLLATIVGLLLQRLAARLGVVTGLHLAEVCHRQYPRVPRIILWLMVELAIIGSDMQEVIGSAIAINLLSVGRIPLWGGVLITIADTFVFLFLDKYGLRKLEAFFGFLITIMALTFGYEYVTVKPSQTQVLKGMFLPSCSGCRTPQIEQAVGIVGAVIMPHNMYLHSALVKSRQVDRASKQEVREANKYFFIESCIALFVSFIINVFVVSVFAEAFFGKTNEQVVAVCKNSSSPHTHLFPEDNSTLAVDIYKGGVVLGCYFGPAALYIWAVGILAAGQSSTMTGTYSGQFVME…
XP_027398672.1	MVLGPEQKIPDDASGDHGDSASLGAINPAYSNSSIPQSPGAGSEDPFTTYFDEKIAIPEEEYSCFSFRKLWAFTGPGFLMSIAYLDPGNIESDLQSGAVAGFKLLWVLLLATIVGLLLQRLAARLGVVTGLHLAEVCHRQYPRVPRIILWLMVELAIIGSDMQEVIGSAIAINLLSVGRIPLWGGVLITIADTFVFLFLDKYGLRKLEAFFGFLITIMALTFGYEYVTVKPSQTQVLKGMFLPSCSGCRTPQIEQAVGIVGAVIMPHNMYLHSALVKSRQVDRANKQEVREANKYFFIESCIALFVSFIINVFVVSVFAEAFFGKTNEQVVAACTNSSSPHTHLFPDDNSTLAVDIYKGGVVLGCYFGPAALYIWAVGILAAGQSSTMTGTYSGQFVME…
XP_027823128.1	MVLGPEQKIPDDASGDHGDSASLGAINPAYSNSSIPQSPGAGSEDPFTTYFNEKIAIPEEEYSCFSFRKLWAFTGPGFLMSIAYLDPGNIESDLQSGAVAGFKLLWVLLLATIVGLLLQRLAARLGVVTGLHLAEVCHRQYPRVPRIILWLMVELAIIGSDMQEVIGSAIAINLLSVGRIPLWGGVLITIADTFVFLFLDKYGLRKLEAFFGFLITIMALTFGYEYVTVKPSQTQVLKGMFLPSCSGCRTPQIEQAVGIVGAVIMPHNMYLHSALVKSRQVDRASKQEVREANKYFFIESCIALFVSFIINVFVVSVFAEAFFGKTNEQVVAVCKNSSSPHTHLFPEDNSTLAVDIYKGGVVLGCYFGPAALYIWAVGILAAGQSSTMTGTYSGQFVME…
XP_020748670.1	MVLGPEQKIPDEDASGDHGDSASLGAINPAYSNASIPQSPGAGSADPFTTYFDEKIAIPEEEYSCFSFRKLWAFTGPGFLMSIAYLDPGNIESDLQSGAVAGFKLLWVLLLATIVGLLLQRLAARLGVVTGLHLAEVCHRQYPRVPRIILWLMVELAIIGSDMQEVIGSAIAINLLSLGRVPLWGGVLITIADTFVFLFLDKYGLRKLEAFFGFLITIMALTFGYEYVTVKPSQTQVLKGMFLPSCSGCRTPQIEQAVGIVGAVIMPHNMYLHSALVKSRQVDRASKQEVREANKYFFIESCIALFVSFIINVFVVSVFAEAFFGKTNEQVVAVCKNSSSPHTHLFPEDNSTLAVDIYKGGVVLGCYFGPAALYIWAVGILAAGQSSTMTGTYSGQFVM…
XP_020748672.1	MVLGPEQKIPDDASGDHGDSASLGAINPAYSNASIPQSPGAGSADPFTTYFDEKIAIPEEEYSCFSFRKLWAFTGPGFLMSIAYLDPGNIESDLQSGAVAGFKLLWVLLLATIVGLLLQRLAARLGVVTGLHLAEVCHRQYPRVPRIILWLMVELAIIGSDMQEVIGSAIAINLLSLGRVPLWGGVLITIADTFVFLFLDKYGLRKLEAFFGFLITIMALTFGYEYVTVKPSQTQVLKGMFLPSCSGCRTPQIEQAVGIVGAVIMPHNMYLHSALVKSRQVDRASKQEVREANKYFFIESCIALFVSFIINVFVVSVFAEAFFGKTNEQVVAVCKNSSSPHTHLFPEDNSTLAVDIYKGGVVLGCYFGPAALYIWAVGILAAGQSSTMTGTYSGQFVME…
XP_005908743.1	MVLGPEQKIPDEDASGDHGDSASLGAINPAYSSSSIPQSPGAGSEDPFTTYFDEKIAIPEEEYSCFSFRKLWAFTGPGFLMSIAYLDPGNIESDLQSGAVAGFKLLWVLLLATIVGLLLQRLAARLGVVTGLHLAEVCHRQYPRVPRIILWLMVELAIIGSDMQEVIGSAIAINLLSVGRIPLWGGVLITIADTFVFLFLDKYGLRKLEAFFGFLITIMALTFGYEYVTVKPSQTQVLKGMFLPSCSGCRTPQTEQAVGIVGAVIMPHNMYLHSALVKSRQVDRANKQEVREANKYFFIESCIALFVSFIINVFVVSVFAEAFFGKTNEQVVAVCTNSSSPHTHLFPDDNSTLAVDIYKGGVVLGCYFGPAALYIWAVGILAAGQSSTMTGTYSGQFVM…
XP_010856129.1	MVLGPEQKIPDDASGDHGDSASLGAINPAYSSSSIPQSPGAGSEDPFTTYFDEKIAIPEEEYSCFSFRKLWAFTGPGFLMSIAYLDPGNIESDLQSGAVAGFKLLWVLLLATIVGLLLQRLAARLGVVTGLHLAEVCHRQYPRVPRIILWLMVELAIIGSDMQEVIGSAIAINLLSVGRIPLWGGVLITIADTFVFLFLDKYGLRKLEAFFGFLITIMALTFGYEYVTVKPSQTQVLKGMFLPSCSGCRTPQTEQAVGIVGAVIMPHNMYLHSALVKSRQVDRANKQEVREANKYFFIESCIALFVSFIINVFVVSVFAEAFFGKTNEQVVAVCTNSSSPHTHLFPDDNSTLAVDIYKGGVVLGCYFGPAALYIWAVGILAAGQSSTMTGTYSGQFVME…
KAA0734894.1	MVLGPEQKIPDEDASGDHGDSASLGAINPAYSSSSIPQSPGAGSEDPFTTYFDEKIAIPEEEYSCFSFRKLWAFTGPGFLMSIAYLDPGNIESDLQSGAVAGFKLLWVLLLATIVGLLLQRLAARLGVVTGLHLAEVCHRQYPRVPRIILWLMVELAIIGSDMQEVIGSAIAINLLSVGRIPLWGGVLITIADTFVFLFLDKYGLRKLEAFFGFLITIMALTFGYEAMKPSQTQVLKGMFLPSCSGCRTPQTEQAVGIVGAVIMPHNMYLHSALVKSRQVDRANKQEVREANKYFFIESCIALFVSFIINVFVVSVFAEAFFGKTNEQVVAVCTNSSSPHTHLFPDDNSTLAVDIYKGGVVLGCYFGPAALYIWAVGILAAGQSSTMTGTYSGQFVMEG…
NP_001094573.1	MVLGPEQKIPDEDASGDHGDSASLGAINPAYSNSSIPQSPGAGSEDPFTTYFDEKIAIPEEEYSCFSFRKLWAFTGPGFLMSIAYLDPGNIESDLQSGAVAGFKLLWVLLLATIVGLLLQRLAARLGVVTGLHLAEVCHRQYPRVPRIILWLMVELAIIGSDMQEVIGSAIAINLLSVGRIPLWGGVLITIADTFVFLFLDKYGLRKLEAFFGFLITIMALTFGYEYVTVKPSQTQVLKGMFLPSCSGCRTPQIEQAVGIVGAVIMPHNMYLHSALVKSRQVDRANKQEVREANKYFFIESCIALFVSFIINVFVVSVFAEAFFGKTNEQVVAVCTNSSSPHTHLFPDDNSTLAVDIYKGGVVLGCYFGPAALYIWAVGILAAGQSSTMTGTYSGQFVM…
XP_005908745.1	MVLGPEQKIPDEDASGDHGDSASLGAINPAYSSSSIPQSPGAGSEDPFTTYFDEKIAIPEEEYSCFSFRKLWAFTGPGFLMSIAYLDPGNIESDLQSGAVAGFKLLWVLLLATIVGLLLQRLAARLGVVTGLHLAEVCHRQYPRVPRIILWLMVELAIIGSDMQEVIGSAIAINLLSVGRIPLWGGVLITIADTFVFLFLDKYGLRKLEAFFGFLITIMALTFGYEYVTVKPSQTQVLKGMFLPSCSGCRTPQTEQAVGIVGAVIMPHNMYLHSALVKSRQVDRANKQEVREANKYFFIESCIALFVSFIINVFVVSVFAEAFFGKTNEQVVAVCTNSSSPHTHLFPDDNSTLAVDIYKGGVVLGCYFGPAALYIWAVGILAAGQSSTMTGTYSGQFVM…
XP_006058587.2	MVLGPEQKIPDEDASGDHGDSASLGAINPAYSNSSIPQSPGAGSEDPFTTYFDEKIAIPEEEYSCFSFRKLWAFTGPGFLMSIAYLDPGNIESDLQSGAVAGFKLLWILLLATTVGLLLQRLAARLGVVTGLHLAEVCHRQYPRVPRIILWLMVELAIIGSDMQEVIGSAIAINLLSVGRIPLWGGVLITIADTFVFLFLDKYGLRKLEAFFGFLITIMALTFGYEYVTVKPSQTQVLKGMFLPSCSGCRTPQIEQAVGIVGAVIMPHNMYLHSALVKSRQVDRANKQEVREANKYFFIESCIALFVSFIINVFVVSVFAEAFFGKTNEQVVAVCKNSSSPHAHLFPDDNSTLAVDIYKGGVVLGCYFGPAALYIWAVGILAAGQSSTMTGTYSGQFVM…
XP_006058588.2	MVLGPEQKIPDDASGDHGDSASLGAINPAYSNSSIPQSPGAGSEDPFTTYFDEKIAIPEEEYSCFSFRKLWAFTGPGFLMSIAYLDPGNIESDLQSGAVAGFKLLWILLLATTVGLLLQRLAARLGVVTGLHLAEVCHRQYPRVPRIILWLMVELAIIGSDMQEVIGSAIAINLLSVGRIPLWGGVLITIADTFVFLFLDKYGLRKLEAFFGFLITIMALTFGYEYVTVKPSQTQVLKGMFLPSCSGCRTPQIEQAVGIVGAVIMPHNMYLHSALVKSRQVDRANKQEVREANKYFFIESCIALFVSFIINVFVVSVFAEAFFGKTNEQVVAVCKNSSSPHAHLFPDDNSTLAVDIYKGGVVLGCYFGPAALYIWAVGILAAGQSSTMTGTYSGQFVME…
NP_001277828.1	MVLGPEQKIPDEDASGDHGDSASLGAINPAYSNSSIPQSPGAGSEDPFTTYFDEKIAIPEEEYSCFSFRKLWAFTGPGFLMSIAYLDPGNIESDLQSGAVAGFKLLWILLLATTVGLLLQRLAARLGVVTGLHLAEVCHRQYPRVPRIILWLMVELAIIGSDMQEVIGSAIAINLLSVGRIPLWGGVLITIADTFVFLFLDKYGLRKLEAFFGFLITIMALTFGYEYVTVKPSQTQVLKGMFLPSCSGCRTPQIEQAVGIVGAVIMPHNMYLHSALVKSRQVDRANKQEVREANKYFFIESCIALFVSFIINVFVVSVFAEAFFGKTNEQVVAVCKNSSSPHAHLFPDDNSTLAVDIYKGGVVLGCYFGPAALYIWAVGILAAGQSSTMTGTYSGQFVM…
XP_022427876.1	MVLGPEQKTPDEDASGDHGDSASLGAINPAYSNSSLPQSPGGHSEDPFTTYFDEKIAIPEEEYSCFSFRKLWAFTGPGFLMSIAYLDPGNIESDLQSGAVAGFKLLWVLLMATIVGLLLQRLAARLGVVTGLHLAEMCHRQYPRVPRIILWLMVELAIVGSDMQEVIGSAIAINLLSAGRVPLWGGVLITIADTFVFLFLDKYGLRKLEAFFGFLITIMALTFGYEYVTVKPSQTQVLKGMFLPSCSGCHTPQIEQAVGIVGAVIMPHNMYLHSALVKSRQVDRANKEEVREANKYFFIESCIALFVSFIINVFVVSVFAEAFFEKTNEQVVEVCRNISSPHTHLFPDDNSTLAVDIYKGGVVLGCYFGPAALYIWAVGILAAGQSSTMTGTYSGQFVM…
XP_029061038.1	MVLGPEQKTPDDASGDHGDSASLGAINPAYSNSSLPQSPGGHSEDPFTTYFDEKIAIPEEEYSCFSFRKLWAFTGPGFLMSIAYLDPGNIESDLQSGAVAGFKLLWVLLMATIVGLLLQRLAARLGVVTGLHLAEMCHRQYPRVPRIILWLMVELAIVGSDMQEVIGSAIAINLLSAGRVPLWGGVLITIADTFVFLFLDKYGLRKLEAFFGFLITIMALTFGYEYVTVKPSQTQVLKGMFLPSCSGCHTPQIEQAVGIVGAVIMPHNMYLHSALVKSRQVDRANKEEVREANKYFFIESCIALFVSFIINVFVVSVFAEAFFEKTNEQVVEVCRNISSPHTHLFPDDNSTLAVDIYKGGVVLGCYFGPAALYIWAVGILAAGQSSTMTGTYSGQFVME…
XP_007452366.1	MVLGPEQKKPDEDASGDHGDSASLGAINPAYSNSSLSQSPGGHSEEPFTTYFDEKIAIPEEEYSCFSFRKLWAFTGPGFLMSIAYLDPGNIESDLQSGAVAGFKLLWVLLMATIVGLLLQRLAARLGVVTGLHLAEVCHRQYPRVPRIILWLMVELAIVGSDMQEVIGSAIAINLLSVGRVPLWGGVLITIADTFVFLFLDKYGLRKLEAFFGFLITIMALTFGYEYVTVKPSQTQVLKGMFLPSCSGCHTPQIEQAVGIVGAVIMPHNMYLHSALVKSRQVDRANKEEVREANKYFFIESCIALFVSFIINVFVVSVFAEAFFEKTNEQVVEVCRNSSSPHTHLFPDDNSTLAVDIYKGGVVLGCYFGPAALYIWAVGILAAGQSSTMTGTYSGQFVM…
XP_007113910.1	MVLGPEQKRPDEDASGDHGDSASLAAINPAYSNSSLPQSPGGHSEEPFTTYFDEKIAIPEEEYSCFSFRKLWAFTGPGFLMSIAYLDPGNIESDLQSGAVAGFKLLWVLLMATIVGLLLQRLAARLGVVTGLHLAEVCHRQYPRVPRIILWLMVELAIVGSDMQEVIGSAIAINLLSVGRVPLWGGVLITIADTFVFLFLDKYGLRKLEAFFGFLITVMALTFGYEYVTVKPSQTQVLKGMFLPSCSGCQTSQIEQAVGIVGAVIMPHNMYLHSALVKSRQVDRANKEEVREANKYFFIESCIALFVSFIINVFVVSVFAEAFFEKTNEQVVEVCRNSSSPHTHLFPDDNSTLAVDIYKGGVVLGCYFGPAALYIWAVGILAAGQSSTMTGTYSGQFVM…
XP_028021629.1	MVLDPEQKTPDEDASGDHGDPASLGAINPAYSNSSLPQSSGGHSEEPFTTYFDEKIAIPEEEYSCFSFRKLWAFTGPGFLMSIAYLDPGNIESDLQSGAVAGFKLLWVLLMATIVGLLLQRLAARLGVVTGLHLAEMCHRQYPRVPRIILWLMVELAIVGSDMQEVIGSAIAINLLSVGRVPLWGGVLITIADTFVFLFLDKYGLRKLEAFFGFLITIMALTFGYEYVTVKPSQTQVLKGMFLPSCSGCHTSQIEQAVGIVGAVIMPHNMYLHSALVKSRQVDRANKEEVREANKYFFIESCIALFVSFIINVFVVSVFAEAFFEKTNKQVVEVCRNISSPHTHLFPDDNSTLTVDIYKGGVVLGCYFGPAALYIWAVGILAAGQSSTMTGTYSGQFVM…
XP_007179419.1	MVLDPEQKTPDDASGDHGDPASLGAINPAYSNSSLPQSSGGHSEEPFTTYFDEKIAIPEEEYSCFSFRKLWAFTGPGFLMSIAYLDPGNIESDLQSGAVAGFKLLWVLLMATIVGLLLQRLAARLGVVTGLHLAEMCHRQYPRVPRIILWLMVELAIVGSDMQEVIGSAIAINLLSVGRVPLWGGVLITIADTFVFLFLDKYGLRKLEAFFGFLITIMALTFGYEYVTVKPSQTQVLKGMFLPSCSGCHTSQIEQAVGIVGAVIMPHNMYLHSALVKSRQVDRANKEEVREANKYFFIESCIALFVSFIINVFVVSVFAEAFFEKTNKQVVEVCRNISSPHTHLFPDDNSTLTVDIYKGGVVLGCYFGPAALYIWAVGILAAGQSSTMTGTYSGQFVME…
XP_007179420.1	MVLDPEQKTPDEDASGDHGDPASLGAINPAYSNSSLPQSSGGHSEEPFTTYFDEKIAIPEEEYSCFSFRKLWAFTGPGFLMSIAYLDPGNIESDLQSGAVAGFKLLWVLLMATIVGLLLQRLAARLGVVTGLHLAEMCHRQYPRVPRIILWLMVELAIVGSDMQEVIGSAIAINLLSVGRVPLWGGVLITIADTFVFLFLDKYGLRKLEAFFGFLITIMALTFGYEYVTVKPSQTQVLKGMFLPSCSGCHTSQIEQAVGIVGAVIMPHNMYLHSALVKSRQVDRANKEEVREANKYFFIESCIALFVSFIINVFVVSVFAEAFFEKTNKQVVEVCRNISSPHTHLFPDDNSTLTVDIYKGGVVLGCYFGPAALYIWAVGILAAGQSSTMTGTYSGQFVM…
XP_019802790.1	MCKSHLESYSKNSDTQVSTMVLGPEQKMPDEDASGDHGDSASLGAINPAYSNSSLPQSPGGHSEDAFTTYFDEKIAIPQEEYSCFSFRKLWAFTGPGFLMSIAYLDPGNIESDLQSGAVAGFKLLWVLLMATIVGLLLQRLAARLGVVTGLHLAEMCHRQYPRVPRIILWLMVELAIVGSDMQEVIGSAIAINLLSAGRVPLWGGVLITIADTFVFLFLDKYGLRKLEAFFGFLITIMALTFGYEYVTVKPSQIQVLKGMFLPSCSGCRTPQIEQAVGIVGAVIMPHNMYLHSALVKSRQVDRANKEEVREANKYFFIESCIALFVSFIINVFVVSVFAEAFFEKTNEQVVEACRSISSPHTHLFPDDNSTLAVDIYKGGVVLGCYFGPAALYIWAVGI…
XP_004274373.1	MVLGPEQKMPDEDASGDHGDSASLGAINPAYSNSSLPQSPGGHSEDAFTTYFDEKIAIPQEEYSCFSFRKLWAFTGPGFLMSIAYLDPGNIESDLQSGAVAGFKLLWVLLMATIVGLLLQRLAARLGVVTGLHLAEMCHRQYPRVPRIILWLMVELAIVGSDMQEVIGSAIAINLLSAGRVPLWGGVLITIADTFVFLFLDKYGLRKLEAFFGFLITIMALTFGYEYVTVKPSQIQVLKGMFLPSCSGCRTPQIEQAVGIVGAVIMPHNMYLHSALVKSRQVDRANKEEVREANKYFFIESCIALFVSFIINVFVVSVFAEAFFEKTNEQVVEACRSISSPHTHLFPDDNSTLAVDIYKGGVVLGCYFGPAALYIWAVGILAAGQSSTMTGTYSGQFVM…
XP_030690925.1	MVLGPEQKTPDEDASGDHGDSASLGAINPAYSNSSLPQSPGGHSEDAFTTYFDEKIAIPQEEYSCFSFRKLWAFTGPGFLMSIAYLDPGNIESDLQSGAVAGFKLLWVLLMATIVGLLLQRLAARLGVVTGLHLAEMCHRQYPRVPRIILWLMVELAIVGSDMQEVIGAAIAINLLSAGRVPLWGGVLITIADTFVFLFLDKYGLRKLEAFFGFLITVMALTFGYEYVTVKPSQIQVLKGMFLPSCSGCRTPQIEQAVGTVGAVIMPHNMYLHSALVKSRQVDRANKEEVREANKYFFIESCIALFVSFIINVFVVSVFAEAFFEKTNEQVVEACRSISSPHTHLFPDDNSTLAVDIYKGGVVLGCYFGPAALYIWAVGILAAGQSSTMTGTYSGQFVM…
XP_019802793.1	MCKSHLESYSKNSDTQVSTMVLGPEQKMPDEDASGDHGDSASLGAINPAYSNSSLPQSPGGHSEDAFTTYFDEKIAIPQEEYSCFSFRKLWAFTGPGFLMSIAYLDPGNIESDLQSGAVAGFKVPRIILWLMVELAIVGSDMQEVIGSAIAINLLSAGRVPLWGGVLITIADTFVFLFLDKYGLRKLEAFFGFLITIMALTFGYEYVTVKPSQIQVLKGMFLPSCSGCRTPQIEQAVGIVGAVIMPHNMYLHSALVKSRQVDRANKEEVREANKYFFIESCIALFVSFIINVFVVSVFAEAFFEKTNEQVVEACRSISSPHTHLFPDDNSTLAVDIYKGGVVLGCYFGPAALYIWAVGILAAGQSSTMTGTYSGQFVMEGFLNLKWSRFARVILTRSIA…
XP_028347144.1	MVLGPEQKRPDEDASGDHGDSASLAAINPAYSNSSLPQSPGGHSEEPFTTYFDEKIAIPEEEYSCFSFRKLWAFTGPGFLMSIAYLDPGNIESDLQSGAVAGFKLLWVLLMATIVGLLLQRLAARLGVVTGLHLAEVCHRQYPRVPRIILWLMVELAIVGSDMQEVIGSAIAINLLSVGRVPLWGGVLITIADTFVFLFLDKYGLRKLEAFFGFLITVMALTFGYELRRAGATLHCGCQTSQIEQAVGIVGAVIMPHNMYLHSALVKSRQVDRANKEEVREANKYFFIESCIALFVSFIINVFVVSVFAEAFFEKTNEQVVEVCRNSSSPHTHLFPDDNSTLAVDIYKGGVVLGCYFGPAALYIWAVGILAAGQSSTMTGTYSGQFVMEGFLNLKWSRF…
XP_007452364.1	MKKQLKKEAAPHIELKSYSKNSDTQVSTMVLGPEQKKPDEDASGDHGDSASLGAINPAYSNSSLSQSPGGHSEEPFTTYFDEKIAIPEEEYSCFSFRKLWAFTGPGFLMSIAYLDPGNIESDLQSGAVAGFKLLWVLLMATIVGLLLQRLAARLGVVTGLHLAEVCHRQYPRVPRIILWLMVELAIVGSDMQEVIGSAIAINLLSVGRVPLWGGVLITIADTFVFLFLDKYGLRKLEAFFGFLITIMALTFGYEYVTVKPSQTQVLKGMFLPSCSGCHTPQIEQAVGIVGAVIMPHNMYLHSALVKSRQVDRANKEEVREANKYFFIESCIALFVSFIINVFVVSVFAEAFFEKTNEQVVEVCRNSSSPHTHLFPDDNSTLAVDIYKGGVVLGCYFGPA…
XP_007452367.1	MVLGPEQKKPDEDASGDHGDSASLGAINPAYSNSSLSQSPGGHSEEPFTTYFDEKIAIPEEEYSCFSFRKLWAFTGPGFLMSIAYLDPGNIESDLQSGAVAGFKLLWVLLMATIVGLLLQRLAARLGVVTGLHLAEVCHRQYPRVPRIILWLMVELAIVGSDMQEVIGSAIAINLLSVGRVPLWGGVLITIADTFVFLFLDKYGLRKLEAFFGFLITIMALTFGYEYVTVKPSQTQVLKGMFLPSCSGCHTPQIEQAVGIVGAVIMPHNMYLHSALVKSRQVDRANKEEVREANKYFFIESCIALFVSFIINVFVVSVFAEAFFEKTNEQVVEVCRNSSSPHTHLFPDDNSTLAVDIYKGGVVLGCYFGPAALYIWAVGILAAGQSSTMTGTYSGQFVM…
XP_007452365.1	MWQEFAIYTFLEKPEGGIMAKDDSLKDASGDHGDSASLGAINPAYSNSSLSQSPGGHSEEPFTTYFDEKIAIPEEEYSCFSFRKLWAFTGPGFLMSIAYLDPGNIESDLQSGAVAGFKLLWVLLMATIVGLLLQRLAARLGVVTGLHLAEVCHRQYPRVPRIILWLMVELAIVGSDMQEVIGSAIAINLLSVGRVPLWGGVLITIADTFVFLFLDKYGLRKLEAFFGFLITIMALTFGYEYVTVKPSQTQVLKGMFLPSCSGCHTPQIEQAVGIVGAVIMPHNMYLHSALVKSRQVDRANKEEVREANKYFFIESCIALFVSFIINVFVVSVFAEAFFEKTNEQVVEVCRNSSSPHTHLFPDDNSTLAVDIYKGGVVLGCYFGPAALYIWAVGILAAGQ…
XP_022427873.1	MVLGPEQKTPDEDASGDHGDSASLGAINPAYSNSSLPQSPGGHSEDPFTTYFDEKIAIPEEEYSCFSFRKLWAFTGPGFLMSIAYLDPGNIESDLQSGAVAGFKLLWVLLMATIVGLLLQRLAARLGVVTGLHLAEMCHRQYPRVPRIILWLMVELAIVGSDMQEVIGSAIAINLLSAGRVPLWGGVLITIADTFVFLFLDKYGLRKLEAFFGFLITIMALTFGYEYVTVKPSQTQVLKGMFLPSCSGCHTPQIEQAVGIVGAVIMPHNMYLHSALVKSRQVDRANKEEVREANKYFFIESCIALFVSFIINVFVVSVFAEAFFEKTNEQVVEVCRNISSPHTHLFPDDNSTLAVDIYKGGVVLGCYFGPAALYIWAVGILAAGQSSTMTGTYSGQFVM…
XP_022427874.1	MVLGPEQKTPDDASGDHGDSASLGAINPAYSNSSLPQSPGGHSEDPFTTYFDEKIAIPEEEYSCFSFRKLWAFTGPGFLMSIAYLDPGNIESDLQSGAVAGFKLLWVLLMATIVGLLLQRLAARLGVVTGLHLAEMCHRQYPRVPRIILWLMVELAIVGSDMQEVIGSAIAINLLSAGRVPLWGGVLITIADTFVFLFLDKYGLRKLEAFFGFLITIMALTFGYEYVTVKPSQTQVLKGMFLPSCSGCHTPQIEQAVGIVGAVIMPHNMYLHSALVKSRQVDRANKEEVREANKYFFIESCIALFVSFIINVFVVSVFAEAFFEKTNEQVVEVCRNISSPHTHLFPDDNSTLAVDIYKGGVVLGCYFGPAALYIWAVGILAAGQSSTMTGTYSGQFVME…
XP_029061039.1	MVLGPEQKTPDEDASGDHGDSASLGAINPAYSNSSLPQSPGGHSEDPFTTYFDEKIAIPEEEYSCFSFRKLWAFTGPGFLMSIAYLDPGNIESDLQSGAVAGFKLLWVLLMATIVGLLLQRLAARLGVVTGLHLAEMCHRQYPRVPRIILWLMVELAIVGSDMQEVIGSAIAINLLSAGRVPLWGGVLITIADTFVFLFLDKYGLRKLEAFFGFLITIMALTFGYEYVTVKPSQTQVLKGMFLPSCSGCHTPQIEQAVGIVGAVIMPHNMYLHSALVKSRQVDRANKEEVREANKYFFIESCIALFVSFIINVFVVSVFAEAFFEKTNEQVVEVCRNISSPHTHLFPDDNSTLAVDIYKGGVVLGCYFGPAALYIWAVGILAAGQSSTMTGTYSGQFVM…
XP_004274372.1	MWQEFAIYTFLEKPDGGIMAKDDSLKDASGDHGDSASLGAINPAYSNSSLPQSPGGHSEDAFTTYFDEKIAIPQEEYSCFSFRKLWAFTGPGFLMSIAYLDPGNIESDLQSGAVAGFKLLWVLLMATIVGLLLQRLAARLGVVTGLHLAEMCHRQYPRVPRIILWLMVELAIVGSDMQEVIGSAIAINLLSAGRVPLWGGVLITIADTFVFLFLDKYGLRKLEAFFGFLITIMALTFGYEYVTVKPSQIQVLKGMFLPSCSGCRTPQIEQAVGIVGAVIMPHNMYLHSALVKSRQVDRANKEEVREANKYFFIESCIALFVSFIINVFVVSVFAEAFFEKTNEQVVEACRSISSPHTHLFPDDNSTLAVDIYKGGVVLGCYFGPAALYIWAVGILAAGQ…
TEA35791.1	MWQEFAIYTFLEKPDGGIMAKDDSLKDASGDHGDSASLGAINPAYSNSSLPQSPGGHSEDAFTTYFDEKIAIPQEEYSCFSFRKLWAFTGPGFLMSIAYLDPGNIESDLQSGAVAGFKLLWVLLMATIVGLLLQRLAARLGVVTGLHLAEMCHRQYPRVPRIILWLMVELAIVGSDMQEVIGSAIAINLLSAGRVPLWGGVLITIADTFVFLFLDKYGLRKLEAFFGFLITIMALTFGYEASYVTVKPSQIQVLKGMFLPSCSGCHTPQIEQAVGIVGAVIMPHNMYLHSALVKSRQVDRANKEEVREANKYFFIESCIALFVSFIINVFVVSVFAEAFFEKTNEQVVEACRSISSPHTHLFPDDNSTLAVDIYKGGVVLGCYFGPAALYIWAVGILAA…
XP_010999274.1	MVLGPEQKMPDEDASGDHGDSASLSAINPAYSNSSLPQSPGGHSEEPFTTYFDEKIAIPEEEYSCFSFRKLWAFTGPGFLMSIAYLDPGNIESDLQSGAVAGFKLLWILLLATIVGLLLQRLAARLGVVTGLHLAEVCHRQYPKVPRIILWLMVELAIIGSDMQEVIGSAIAINLLSVGRIPLWGGVLITIADTFVFLFLDKYGLRKLEAFFGFLITVMALTFGYEYVTVKPSQSQVLKGMFLPSCSGCRTPQIEQAVGIVGAVIMPHNMYLHSALVKSRQVNRANKQEVREANKYFFIESCIALFVSFIINVFVVSVFAEAFFEKTNEQVVEVCRNSSSPHTHLFPDDNSTLAVDIYKGGVVLGCYFGPAALYIWAVGILAAGQSSTMTGTYSGQFVM…
XP_006203038.1	MVLGPEQKMPDEDASGDHGDSASLSAINPAYSNSSLPRSPGGHSEEPFTTYFDEKIAIPEEEYSCFSFRKLWAFTGPGFLMSIAYLDPGNIESDLQSGAVAGFKLLWILLLATIVGLLLQRLAARLGVVTGLHLAEVCHRQYPKVPRIILWLMVELAIIGSDMQEVIGSAIAINLLSVGRIPLWGGVLITIADTFVFLFLDKYGLRKLEAFFGFLITVMALTFGYEYVTVKPSQSQVLKGMFLPSCSGCRTPQIEQAVGIVGAVIMPHNMYLHSALVKSRQVNRANKQEVREANKYFFIESCIALFVSFIINVFVVSVFAEAFFEKTNEQVVEVCRNSSSPHTHLFPDDNSTLAVDIYKGGVVLGCYFGPAALYIWAVGILAAGQSSTMTGTYSGQFVM…
XP_010999275.1	MVLGPEQKMPDDASGDHGDSASLSAINPAYSNSSLPQSPGGHSEEPFTTYFDEKIAIPEEEYSCFSFRKLWAFTGPGFLMSIAYLDPGNIESDLQSGAVAGFKLLWILLLATIVGLLLQRLAARLGVVTGLHLAEVCHRQYPKVPRIILWLMVELAIIGSDMQEVIGSAIAINLLSVGRIPLWGGVLITIADTFVFLFLDKYGLRKLEAFFGFLITVMALTFGYEYVTVKPSQSQVLKGMFLPSCSGCRTPQIEQAVGIVGAVIMPHNMYLHSALVKSRQVNRANKQEVREANKYFFIESCIALFVSFIINVFVVSVFAEAFFEKTNEQVVEVCRNSSSPHTHLFPDDNSTLAVDIYKGGVVLGCYFGPAALYIWAVGILAAGQSSTMTGTYSGQFVME…
XP_006192481.1	MVLGPEQKMPDEDASGDHGDSAGLSAINPAYSNSSLPQSPGGHSEEPFTTYFDEKIAIPEEEYSCFSFRKLWAFTGPGFLMSIAYLDPGNIESDLQSGAVAGFKLLWILLLATIVGLLLQRLAARLGVVTGLHLAEVCHRQYPKVPRIILWLMVELAIIGSDMQEVIGSAIAINLLSVGRIPLWGGVLITIADTFVFLFLDKYGLRKLEAFFGFLITVMALTFGYEYVTVKPSQSQVLKGMFLPSCSGCRTPQIEQAVGIVGAVIMPHNMYLHSALVKSRQVNRANKQEVREANKYFFIESCIALFVSFIINVFVVSVFAEAFFEKTNEQVVEVCRNSSSPHTHLFPDDNSTLAVDIYKGGVVLGCYFGPAALYIWAVGILAAGQSSTMTGTYSGQFVM…
KAB1269726.1	MVLGPEQKMPDEDASGDHGDSASLSAINPAYSNSSLPQSPGGHSEEPFTTYFDEKIAIPEEEYSCFSFRKLWAFTGPGFLMSIAYLDPGNIESDLQSGAVAGFKLLWILLLATIVGLLLQRLAARLGVVTGLHLAEVCHRQYPKVPRIILWLMVELAIIGSDMQEVIGSAIAINLLSVGRIPLWGGVLITIADTFVFLFLDKYGLRKLEAFFGFLITVMALTFGYEASYVTVKPSQSQVLKGMFLPSCSGCRTPQIEQAVGIVGAVIMPHNMYLHSALVKSRQVNRANKQEVREANKYFFIESCIALFVSFIINVFVVSVFAEAFFEKTNEQVVEVCRNSSSPHTHLFPDDNSTLAVDIYKGGVVLGCYFGPAALYIWAVGILAAGQSSTMTGTYSGQF…
XP_015093599.1	MVLGPEQKMPDDASGDHGDSASLSAINPAYSNSSLPRSPGGHSEEPFTTYFDEKIAIPEEEYSCFSFRKLWAFTGPGFLMSIAYLDPGNIESDLQSGAVAGFKLLWILLLATIVGLLLQRLAARLGVVTGLHLAEVCHRQYPKVPRIILWLMVELAIIGSDMQEVIGSAIAINLLSVGRIPLWGGVLITIADTFVFLFLDKYGLRKLEAFFGFLITVMALTFGYEYVTVKPSQSQVLKGMFLPSCSGCRTPQIEQAVGIVGAVIMPHNMYLHSALVKSRQVNRANKQEVREANKYFFIESCIALFVSFIINVFVVSVFAEAFFEKTNEQVVEVCRNSSSPHTHLFPDDNSTLAVDIYKGGVVLGCYFGPAALYIWAVGILAAGQSSTMTGTYSGQFVME…
XP_014421279.1	MVLGPEQKMPDDASGDHGDSAGLSAINPAYSNSSLPQSPGGHSEEPFTTYFDEKIAIPEEEYSCFSFRKLWAFTGPGFLMSIAYLDPGNIESDLQSGAVAGFKLLWILLLATIVGLLLQRLAARLGVVTGLHLAEVCHRQYPKVPRIILWLMVELAIIGSDMQEVIGSAIAINLLSVGRIPLWGGVLITIADTFVFLFLDKYGLRKLEAFFGFLITVMALTFGYEYVTVKPSQSQVLKGMFLPSCSGCRTPQIEQAVGIVGAVIMPHNMYLHSALVKSRQVNRANKQEVREANKYFFIESCIALFVSFIINVFVVSVFAEAFFEKTNEQVVEVCRNSSSPHTHLFPDDNSTLAVDIYKGGVVLGCYFGPAALYIWAVGILAAGQSSTMTGTYSGQFVME…
XP_020937366.1	MESYSKNSGTQVSAMVLGPEQKTPSEDASGEHGDTASLGAINPAYSHSSLPQSPGGLSEEPFTTYFDEKIAIPEEEHSCFSFRKLWAFTGPGFLMSIAYLDPGNIESDLQSGAVAGFKLLWILLLATIVGLLLQRLAARLGVVTGLHLAEVCHRQYPKVPRIILWLMVELAIIGSDMQEVIGSAIAINLLSVGRIPLWGGVLITIADTFVFLFLDKYGLRKLEAFFGFLITVMALTFGYEYVTVKPSQSQVLKGMFLPSCSGCRTPQIEQAVGIVGAVIMPHNMYLHSALVKSRQVNRANKEEVREANKYFFIESCIALFVSFIINVFVVSVFAEAFFEKTNQQVVDVCRNSSSPHSDLFPEDNSTLAVDIYKGGVVLGCYFGPAALYIWAVGILAAGQ…
XP_020937365.1	MKKGKKEAAPCCELKSYSKNSGTQVSAMVLGPEQKTPSEDASGEHGDTASLGAINPAYSHSSLPQSPGGLSEEPFTTYFDEKIAIPEEEHSCFSFRKLWAFTGPGFLMSIAYLDPGNIESDLQSGAVAGFKLLWILLLATIVGLLLQRLAARLGVVTGLHLAEVCHRQYPKVPRIILWLMVELAIIGSDMQEVIGSAIAINLLSVGRIPLWGGVLITIADTFVFLFLDKYGLRKLEAFFGFLITVMALTFGYEYVTVKPSQSQVLKGMFLPSCSGCRTPQIEQAVGIVGAVIMPHNMYLHSALVKSRQVNRANKEEVREANKYFFIESCIALFVSFIINVFVVSVFAEAFFEKTNQQVVDVCRNSSSPHSDLFPEDNSTLAVDIYKGGVVLGCYFGPAA…
XP_020937367.1	MVLGPEQKTPSEDASGEHGDTASLGAINPAYSHSSLPQSPGGLSEEPFTTYFDEKIAIPEEEHSCFSFRKLWAFTGPGFLMSIAYLDPGNIESDLQSGAVAGFKLLWILLLATIVGLLLQRLAARLGVVTGLHLAEVCHRQYPKVPRIILWLMVELAIIGSDMQEVIGSAIAINLLSVGRIPLWGGVLITIADTFVFLFLDKYGLRKLEAFFGFLITVMALTFGYEYVTVKPSQSQVLKGMFLPSCSGCRTPQIEQAVGIVGAVIMPHNMYLHSALVKSRQVNRANKEEVREANKYFFIESCIALFVSFIINVFVVSVFAEAFFEKTNQQVVDVCRNSSSPHSDLFPEDNSTLAVDIYKGGVVLGCYFGPAALYIWAVGILAAGQSSTMTGTYSGQFVM…
NP_001121912.1	MVLGPEQKTPSEDASGEHGDTASLGAINPAYSHSSLPQSPGGLSEEPFTTYFDEKIAIPEEEHSCFSFRKLWAFTGPGFLMSIAYLDPGNIESDLQSGAVAGFKLLWILLLATIVGLLLQRLAARLGVVTGLHLAEVCHRQYPKVPRIILWLMVELAIIGSDMQEVIGSAIAINLLSVGRIPLWGGVLITIADTFVFLFLDKYGLRKLEAFFGFLITVMALTFGYEYVTVKPSQSQVLKGMFLPSCSGCRTPQIEQAVGIVGAVIMPHNMYLHSALVKSRQVNRANKEEVREANKYFFIESCIALFVSFIINVFVVSVFAEAFFEKTNQQVVDVCRNSSSPHSDLFPEDNSTLAVDIYKGGVVLGCYFGPAALYIWAVGILAAGQSSTMTGTYSGQFVM…
KAB0389063.1	PEMWQEFAIYTFLEEPDGGIMSKDDSLKDASGDHGDPASLGAINPAYSNSSLPQSSGGHSEEPFTTYFDEKIAIPEEEYSCFSFRKLWAFTGPGFLMSIAYLDPGNIESDLQSGAVAGFKLLWVLLMATIVGLLLQRLAARLGVVTGLHLAEMCHRQYPKVPRIILWLMVELAIVGSDMQEVIGSAIAINLLSVGRVPLWGGVLITIADTFVFLFLDKYVKPSQTQVLKGMFLPSCSGCHTSQIEQAVGIVGAVIMPHNMYLHSALVKVDRANKEEVREANKYFFIESCIALFVSFIINVFVVSVFAEAFFEKTNKQVVEVCRNISSPHTHLFPDDNSTLTVDIYKGGVVLGCYFGPAALYIWAVGILAAGQSSTMTGTYSGQFVMEGFLNLKWSRFAR…
TKC52648.1	MVLGPEQKTPDANNIIMETCSIQSSLSLKPEMWQEFAIYTFLEKPDGGIMAKDDSLKDASGDHGDSASLGAINPAYSNSSLPQSPGGHSEDPFTTYFDEKIAIPEEEYSCFSFRKLWAFTGPGFLMSIAYLDPGNIESDLQSGAVAGFKLLWVLLMATIVGLLLQRLAARLGVVTGLHLAEMCHRQYPRVPRIILWLMVELAIVGSDMQEVIGSAIAINLLSAGRVPLWGGVLITIADTFVFLFLDKYVKPSQTQVLKGMFLPSCSGCHTPQIEQAVGIVGAVIMPHNMYLHSALVKVDRANKEEVREANKYFFIESCIALFVSFIINVFVVSVFAEAFFEKTNEQVGVVLGCYFGPAALYIWAVGILAAGQSSTMTGTYSGQFVMEGFLNLKWSRFAR…
XP_026962078.1	MVLGPEQKMPDEDASGDHGDSASLGAINPAYSNSSLPQSPGGHSEDAFTTYFDEKIAIPQEEYSCFSFRKLWAFTGPGFLMSIAYLDPGNIESDLQSGAVAGFKVPRIILWLMVELAIVGSDMQEVIGSAIAINLLSAGRVPLWGGVLITIADTFVFLFLDKYGLRKLEAFFGFLITIMALTFGYEYVTVKPSQIQVLKGMFLPSCSGCRTPQIEQAVGIVGAVIMPHNMYLHSALVKSRQVDRANKEEVREANKYFFIESCIALFVSFIINVFVVSVFAEAFFEKTNEQVVEACRSISSPHTHLFPDDNSTLAVDIYKGGVVLGCYFGPAALYIWAVGILAAGQSSTMTGTYSGQFVMEGFLNLKWSRFARVILTRSIAIIPTLLVAVFQDVEHLTGM…
XP_025738754.1	MGMCNCRPVGQSRGVWGLARLALAPGIWSCQREGILSGGCGAESYSKYLDTQASTMVLGPEQKMPDDDVSGDHGDSPSLGTLNPAYSTSSLPRSTEHSQEPFTTYFDEKITIPEEEYSCFSFRKLWAFTGPGFLMSIAYLDPGNIESDLQSGAVAGFKLLWVLLLATVVGLLLQRLAARLGVVTGLHLAEVCHRQYPKVPRIILWLMVELAIIGSDMQEVIGSAIAINLLSVGRVPLWGGVLITIADTFVFLFLDKYGLRKLEAFFGFLITIMALTFGYEYITVKPSQSQVLKGMFLPSCSGCHTPQVEQAVGIVGAVIMPHNMYLHSALVKSRQVNRANKQEVREANKYFFIESCIALFVSFIINVFVVSVFAEAFFEKTNDQVIAVCRNNSSPHTHL…
XP_027981359.1	MGMCNCRPVGQSRGVWGLARLALAPGIWSSQREGILSGGCGAESYSKYLDTQASTMVLGPEQKVPDDDVSGDHGDSPSLGTLNPAYSTSSLPRSTEHSQEPFTTYFDEKITIPEEEYSCFSFRKLWAFTGPGFLMSIAYLDPGNIESDLQSGAVAGFKLLWVLLLATVVGLLLQRLAARLGVVTGLHLAEVCHRQYPKVPRIILWLMVELAIIGSDMQEVIGSAIAINLLSVGRVPLWGGVLITIADTFVFLFLDKYGLRKLEAFFGFLITIMALTFGYEYITVKPSQSQVLKGMFLPSCSGCHTPQVEQAVGIVGAVIMPHNMYLHSALVKSRQVNRANKQEVREANKYFFIESCIALFVSFIINVFVVSVFAEAFFEKTNDQVIAVCRNNSSPHTHL…
XP_025738755.1	MGMCNCRPVGQSRGVWGLARLALAPGIWSCQREGILSGGCGADDVSGDHGDSPSLGTLNPAYSTSSLPRSTEHSQEPFTTYFDEKITIPEEEYSCFSFRKLWAFTGPGFLMSIAYLDPGNIESDLQSGAVAGFKLLWVLLLATVVGLLLQRLAARLGVVTGLHLAEVCHRQYPKVPRIILWLMVELAIIGSDMQEVIGSAIAINLLSVGRVPLWGGVLITIADTFVFLFLDKYGLRKLEAFFGFLITIMALTFGYEYITVKPSQSQVLKGMFLPSCSGCHTPQVEQAVGIVGAVIMPHNMYLHSALVKSRQVNRANKQEVREANKYFFIESCIALFVSFIINVFVVSVFAEAFFEKTNDQVIAVCRNNSSPHTHLFPDDNSTLTVDIYKGGVVLGCYFG…
XP_027451170.1	MGMCNCRPVGQSRGVWGLARLALAPGIWSCQREGILSGGCGAESYSKYLDTQASTMVLGPEQKMPDDDVSGDHGDSPSLGTLNPAYSTSSLPRSTEHSQEPFTTYFDEKITIPEEEYSCFSFRKLWAFTGPGFLMSIAYLDPGNIESDLQSGAVAGFKLLWVLLLATVVGLLLQRLAARLGVVTGLHLAEVCHRQYPKVPRIILWLMVELAIIGSDMQEVIGSAIAINLLSVGRVPLWGGVLITIADTFVFLFLDKYGLRKLEAFFGFLITIMALTFGYEYITVKPSQSQVLKGMFLPSCSGCHTPQVEQAVGIVGAVIMPHNMYLHSALVKSRQVNRANKQEVREANKYFFIESCIALFVSFIINVFVVSVFAEAFFEKTNDQVIAVCRNNSSPHTHL…
XP_027981360.1	MGMCNCRPVGQSRGVWGLARLALAPGIWSSQREGILSGGCGADDVSGDHGDSPSLGTLNPAYSTSSLPRSTEHSQEPFTTYFDEKITIPEEEYSCFSFRKLWAFTGPGFLMSIAYLDPGNIESDLQSGAVAGFKLLWVLLLATVVGLLLQRLAARLGVVTGLHLAEVCHRQYPKVPRIILWLMVELAIIGSDMQEVIGSAIAINLLSVGRVPLWGGVLITIADTFVFLFLDKYGLRKLEAFFGFLITIMALTFGYEYITVKPSQSQVLKGMFLPSCSGCHTPQVEQAVGIVGAVIMPHNMYLHSALVKSRQVNRANKQEVREANKYFFIESCIALFVSFIINVFVVSVFAEAFFEKTNDQVIAVCRNNSSPHTHLFPDDNSTLTVDIYKGGVVLGCYFG…
XP_027451171.1	MKKQRKMEEAPHCELKSYSKYLDTQASTMVLGPEQKMPDDDVSGDHGDSPSLGTLNPAYSTSSLPRSTEHSQEPFTTYFDEKITIPEEEYSCFSFRKLWAFTGPGFLMSIAYLDPGNIESDLQSGAVAGFKLLWVLLLATVVGLLLQRLAARLGVVTGLHLAEVCHRQYPKVPRIILWLMVELAIIGSDMQEVIGSAIAINLLSVGRVPLWGGVLITIADTFVFLFLDKYGLRKLEAFFGFLITIMALTFGYEYITVKPSQSQVLKGMFLPSCSGCHTPQVEQAVGIVGAVIMPHNMYLHSALVKSRQVNRANKQEVREANKYFFIESCIALFVSFIINVFVVSVFAEAFFEKTNDQVIAVCRNNSSPHTHLFPDDNSTLTVDIYKGGVVLGCYFGPAA…
XP_021560588.1	MKKRPKMEEAPHCELKSYSKDLDTQASTMVLGPEQKMPDDDVSGDHGDSPSLGTLNPAYSTSSLPQSTEHSQEPFTTYFDEKITIPEEEYSCFSFRKLWAFTGPGFLMSIAYLDPGNIESDLQSGAVAGFKLLWVLLLATLVGLLLQRLAARLGVVTGLHLAEVCHRQYPKVPRIILWLMVELAIIGSDMQEVIGSAIAINLLSVGRVPLWGGVLITIADTFVFLFLDKYGLRKLEAFFGFLITIMALTFGYEYVTVKPSQSQVLKGMFLPSCSGCHTPQVEQAVGIVGAVIMPHNMYLHSALVKSRQVNRANKQEVREANKYFFIESCIALFVSFIINVFVVSVFAEAFFEKTNDQVIAVCRNNSSPHTHLFPDDNSTLTVDIYKGGVVLGCYFGPAA…
XP_026357656.1	MKKQPKTEEAPHCELKSYSKNLDTQASTMVLGPEQKMPDDDASGDHGDSPSLGTLNPAYSSSSLPQSAEDSQEPFTTYFDEKIAIPEEEHSCFSFRKLWAFTGPGFLMSIAYLDPGNIESDLQSGAVAGFKLLWVLLLATIVGLLLQRLAARLGVVTGLHLAEVCHRQYPKVPRIILWLMVELAIIGSDMQEVIGSAIAINLLSVGRVPLWGGVLITIADTFVFLFLDKYGLRKLEAFFGFLITIMALTFGYEYVTVKPSQSQVLKGMFLPSCSGCHTPQVEQAVGIVGAVIMPHNMYLHSALVKSRQVNRANKQEVREANKYFFIESCIALFVSFIINVFVVSVFAEAFFEKTNDQVIAVCRNNSSPHTHLFPDDNSTLAVDIYKGGVVLGCYFGPAA…
XP_019657661.1	MKKQPKTEEAPHCELKSYSKNLDTQASTMVLGPEQKMPDDDASGDHGDSPSLGTLNPAYSSSSLPQSAEHSQEPFTTYFDEKIAIPEEEHSCFSFRKLWAFTGPGFLMSIAYLDPGNIESDLQSGAVAGFKLLWVLLLATIVGLLLQRLAARLGVVTGLHLAEVCHRQYPKVPRIILWLMVELAIIGSDMQEVIGSAIAINLLSVGRVPLWGGVLITIADTFVFLFLDKYGLRKLEAFFGFLITIMALTFGYEYVTVKPSQSQVLKGMFLPSCSGCHTPQIEQAVGIVGAVIMPHNMYLHSALVKSRQVNRANKQEVREANKYFFIESCIALFVSFIINVFVVSVFAEAFFEKTNNQVIAVCRNNSSPHTHLFPDDNSTLAVDIYKGGVVLGCYFGPAA…
XP_026357655.1	MAEPPAGPATAPEPVTEESYSKNLDTQASTMVLGPEQKMPDDDASGDHGDSPSLGTLNPAYSSSSLPQSAEDSQEPFTTYFDEKIAIPEEEHSCFSFRKLWAFTGPGFLMSIAYLDPGNIESDLQSGAVAGFKLLWVLLLATIVGLLLQRLAARLGVVTGLHLAEVCHRQYPKVPRIILWLMVELAIIGSDMQEVIGSAIAINLLSVGRVPLWGGVLITIADTFVFLFLDKYGLRKLEAFFGFLITIMALTFGYEYVTVKPSQSQVLKGMFLPSCSGCHTPQVEQAVGIVGAVIMPHNMYLHSALVKSRQVNRANKQEVREANKYFFIESCIALFVSFIINVFVVSVFAEAFFEKTNDQVIAVCRNNSSPHTHLFPDDNSTLAVDIYKGGVVLGCYFGP…
XP_019657664.1	MVEESYSKNLDTQASTMVLGPEQKMPDDDASGDHGDSPSLGTLNPAYSSSSLPQSAEHSQEPFTTYFDEKIAIPEEEHSCFSFRKLWAFTGPGFLMSIAYLDPGNIESDLQSGAVAGFKLLWVLLLATIVGLLLQRLAARLGVVTGLHLAEVCHRQYPKVPRIILWLMVELAIIGSDMQEVIGSAIAINLLSVGRVPLWGGVLITIADTFVFLFLDKYGLRKLEAFFGFLITIMALTFGYEYVTVKPSQSQVLKGMFLPSCSGCHTPQIEQAVGIVGAVIMPHNMYLHSALVKSRQVNRANKQEVREANKYFFIESCIALFVSFIINVFVVSVFAEAFFEKTNNQVIAVCRNNSSPHTHLFPDDNSTLAVDIYKGGVVLGCYFGPAALYIWAVGILAAG…
XP_008702800.1	MVLGPEQKMPDDDASGDHGDSPSLGTLNPAYSSSSLPQSAEDSQEPFTTYFDEKIAIPEEEHSCFSFRKLWAFTGPGFLMSIAYLDPGNIESDLQSGAVAGFKLLWVLLLATIVGLLLQRLAARLGVVTGLHLAEVCHRQYPKVPRIILWLMVELAIIGSDMQEVIGSAIAINLLSVGRVPLWGGVLITIADTFVFLFLDKYGLRKLEAFFGFLITIMALTFGYEYVTVKPSQSQVLKGMFLPSCSGCHTPQIEQAVGIVGAVIMPHNMYLHSALVKSRQVNRANKQEVREANKYFFIESCIALFVSFIINVFVVSVFAEAFFEKTNDQVIAVCRNNSSPHTHLFPDDNSTLAVDIYKGGVVLGCYFGPAALYIWAVGILAAGQSSTMTGTYSGQFVME…
XP_026357657.1	MVLGPEQKMPDDDASGDHGDSPSLGTLNPAYSSSSLPQSAEDSQEPFTTYFDEKIAIPEEEHSCFSFRKLWAFTGPGFLMSIAYLDPGNIESDLQSGAVAGFKLLWVLLLATIVGLLLQRLAARLGVVTGLHLAEVCHRQYPKVPRIILWLMVELAIIGSDMQEVIGSAIAINLLSVGRVPLWGGVLITIADTFVFLFLDKYGLRKLEAFFGFLITIMALTFGYEYVTVKPSQSQVLKGMFLPSCSGCHTPQVEQAVGIVGAVIMPHNMYLHSALVKSRQVNRANKQEVREANKYFFIESCIALFVSFIINVFVVSVFAEAFFEKTNDQVIAVCRNNSSPHTHLFPDDNSTLAVDIYKGGVVLGCYFGPAALYIWAVGILAAGQSSTMTGTYSGQFVME…
XP_025738756.1	MVLGPEQKMPDDDVSGDHGDSPSLGTLNPAYSTSSLPRSTEHSQEPFTTYFDEKITIPEEEYSCFSFRKLWAFTGPGFLMSIAYLDPGNIESDLQSGAVAGFKLLWVLLLATVVGLLLQRLAARLGVVTGLHLAEVCHRQYPKVPRIILWLMVELAIIGSDMQEVIGSAIAINLLSVGRVPLWGGVLITIADTFVFLFLDKYGLRKLEAFFGFLITIMALTFGYEYITVKPSQSQVLKGMFLPSCSGCHTPQVEQAVGIVGAVIMPHNMYLHSALVKSRQVNRANKQEVREANKYFFIESCIALFVSFIINVFVVSVFAEAFFEKTNDQVIAVCRNNSSPHTHLFPDDNSTLTVDIYKGGVVLGCYFGPAALYIWAVGILAAGQSSTMTGTYSGQFVME…
XP_004782128.1	MKRQPKVEEAPHCELKSYSKNSDTQASTMVLGPEQKMPDDDISGDHGDSPSLGALNPAYSTSSLPQSEEHSQEPFTTYFDEKITIPEEEYSCFSFRKLWAFTGPGFLMSIAYLDPGNIESDLQSGAVAGFKLLWVLLLATVVGLLLQRLAARLGVVTGLHLAEVCHRQYPKVPRIILWLMVELAIIGSDMQEVIGSAIAINLLSVGRVPLWGGVLITIADTFVFLFLDKYGLRKLEAFFGFLITIMALTFGYEYVTVKPSQSQVLKGMFLPSCSGCHTPQIEQAVGIVGAVIMPHNMYLHSALVKSRQVNRANKQEVREANKYFFIESCIALFVSFIINVFVVSVFAEAFFEKTNDQVIAVCRNNSSPHTHLFPDDNSTLAVDIYKGGVVLGCYFGPAA…
XP_022375199.1	MKKQPKMEEAPHCELKSYSKRLDTQASTMVLGPEQKMPDDDVSGDHGNSPSLGALNPAYSTSSLPQSEEHSQEPFTTYFDEKITIPEEEYSCFSYRKLWAFTGPGFLMSIAYLDPGNIESDLQSGAVAGFKLLWVLLLATVVGLLLQRLAARLGVVTGLHLAEVCHRQYPKVPRIILWLMVELAIIGSDMQEVIGSAIAINLLSVGRVPLWGGVLITIADTFVFLFLDKYGLRKLEAFFGFLITIMALTFGYEYVTVKPSQSQVLKGMFLPSCSGCHTPQIEQAVGIVGAVIMPHNMYLHSALVKSRQVNRANKQEVREANKYFFIESCIALFVSFIINVFVVSVFAEAFFEKTNNQVIAVCRNNSSPHTHLFPDDNSTLAVDIYKGGVVLGCYFGPAA…
XP_002921615.1	MVLGPEQKMPDDDASGDHGDSPSLGTLNPAYSSSSLPQSAEHSQEPFTTYFDEKIAIPEEEHSCFSFRKLWAFTGPGFLMSIAYLDPGNIESDLQSGAVAGFKLLWVLLLATIVGLLLQRLAARLGVVTGLHLAEVCHRQYPKVPRIILWLMVELAIIGSDMQEVIGSAIAINLLSVGRVPLWGGVLITIADTFVFLFLDKYGLRKLEAFFGFLITIMALTFGYEYVTVKPSQSQVLKGMFLPSCSGCHTPQIEQAVGIVGAVIMPHNMYLHSALVKSRQVNRANKQEVREANKYFFIESCIALFVSFIINVFVVSVFAEAFFEKTNNQVIAVCRNNSSPHTHLFPDDNSTLAVDIYKGGVVLGCYFGPAALYIWAVGILAAGQSSTMTGTYSGQFVME…
XP_022375200.1	MVLGPEQKMPDDDVSGDHGNSPSLGALNPAYSTSSLPQSEEHSQEPFTTYFDEKITIPEEEYSCFSYRKLWAFTGPGFLMSIAYLDPGNIESDLQSGAVAGFKLLWVLLLATVVGLLLQRLAARLGVVTGLHLAEVCHRQYPKVPRIILWLMVELAIIGSDMQEVIGSAIAINLLSVGRVPLWGGVLITIADTFVFLFLDKYGLRKLEAFFGFLITIMALTFGYEYVTVKPSQSQVLKGMFLPSCSGCHTPQIEQAVGIVGAVIMPHNMYLHSALVKSRQVNRANKQEVREANKYFFIESCIALFVSFIINVFVVSVFAEAFFEKTNNQVIAVCRNNSSPHTHLFPDDNSTLAVDIYKGGVVLGCYFGPAALYIWAVGILAAGQSSTMTGTYSGQFVME…
XP_027981361.1	MVLGPEQKVPDDDVSGDHGDSPSLGTLNPAYSTSSLPRSTEHSQEPFTTYFDEKITIPEEEYSCFSFRKLWAFTGPGFLMSIAYLDPGNIESDLQSGAVAGFKLLWVLLLATVVGLLLQRLAARLGVVTGLHLAEVCHRQYPKVPRIILWLMVELAIIGSDMQEVIGSAIAINLLSVGRVPLWGGVLITIADTFVFLFLDKYGLRKLEAFFGFLITIMALTFGYEYITVKPSQSQVLKGMFLPSCSGCHTPQVEQAVGIVGAVIMPHNMYLHSALVKSRQVNRANKQEVREANKYFFIESCIALFVSFIINVFVVSVFAEAFFEKTNDQVIAVCRNNSSPHTHLFPDDNSTLTVDIYKGGVVLGCYFGPAALYIWAVGILAAGQSSTMTGTYSGQFVME…
XP_006735211.1	MVLGPEQKMPDDDVSGDHGDSPSLGTLNPAYSTSSLPQSTEHSQEPFTTYFDEKITIPEEEYSCFSFRKLWAFTGPGFLMSIAYLDPGNIESDLQSGAVAGFKLLWVLLLATVVGLLLQRLAARLGVVTGLHLAEVCHRQYPKVPRIILWLMVELAIIGSDMQEVIGSAIAINLLSVGRVPLWGGVLITIADTFVFLFLDKYGLRKLEAFFGFLITIMALTFGYEYVTVKPSQSQVLKGMFLPSCSGCHTPQVEQAVGIVGAVIMPHNMYLHSALVKSRQVNRANKQEVREANKYFFIESCIALFVSFIINVFVVSVFAEAFFEKTNDQVIAVCRNNSSPHTHLFPDDNSTLTVDIYKGGVVLGCYFGPAALYIWAVGILAAGQSSTMTGTYSGQFVME…
XP_004400880.1	MKKQPKMEEAPHCELKSYSKYLDTQASTMVLGPEQKMPDDDVSADHGDSPSLGTLNPAYSTSSLPRSTEHSQEPFTTYFDEKITIPEEEYSCFSFRKLWAFTGPGFLMSIAYLDPGNIESDLQSGAVAGFKLLWVLLLATVVGLLLQRLAARLGVVTGLHLAEVCHRQYPKVPRIILWLMVELAIIGSDMQEVIGSAIAINLLSVGRVPLWGGVLITIADTFVFLFLDKYGLRKLEAFFGFLITIMALTFGYEYITVKPSQSQVLKGMFLPSCSGCHTPQVEQAVGIVGAVIMPHNMYLHSALVKSRQVNRANKQEVREANKYFFIESCIALFVSFIINVFVVSVFAEAFFEKTNDQVIAVCRNNSSPHTHLFPDDNSTLAVDIYKGGVVLGCYFGPAA…
XP_025333418.1	MKKQPKKDEASHCELKTYSKKSDTQASTMVLGPEQKMADDDASGDHGDSPSLGTLNPAYSNSSLPQSTEHSQEPFTTYFDEKIAIPEEEYSCFSFRKLWAFTGPGFLMSIAYLDPGNIESDLQSGAVAGFKLLWVLLLATIVGLLLQRLAARLGVVTGLHLAEVCHRQYPKVPRIILWLMVELAIIGSDMQEVIGSAIAINLLSVGRVPLWGGVLITIADTFVFLFLDKYGLRKLEAFFGFLITIMALTFGYEYVTVKPSQSQVLKGMFLPSCSGCHTPQIEQAVGIVGAVIMPHNMYLHSALVKSRQINRANKQEVREANKYFFIESCIALFVSFIINVFVVSVFAEAFFEKTNDQVVAVCRNSSSPHSHLFPDDNSTLAVDIYKGGVVLGCYFGPAA…
XP_543669.4	MKKQPKKDEAPHCELKTYSKKSDTQASTMVLGPEQKMADDDASGDHGDSPSLGTLNPAYSNSSLPQSTEHSQEPFTTYFDEKIAIPEEEYSCFSFRKLWAFTGPGFLMSIAYLDPGNIESDLQSGAVAGFKLLWVLLLATIVGLLLQRLAARLGVVTGLHLAEVCHRQYPKVPRIILWLMVELAIIGSDMQEVIGSAIAINLLSVGRVPLWGGVLITIADTFVFLFLDKYGLRKLEAFFGFLITIMALTFGYEYVTVKPSQSQVLKGMFLPSCSGCHTPQIEQAVGIVGAVIMPHNMYLHSALVKSRQINRANKQEVREANKYFFIESCIALFVSFIINVFVVSVFAEAFFEKTNDQVVAVCRNSSSPHSHLFPDDNSTLAVDIYKGGVVLGCYFGPAA…
XP_005636886.1	MVLGPEQKMADDDASGDHGDSPSLGTLNPAYSNSSLPQSTEHSQEPFTTYFDEKIAIPEEEYSCFSFRKLWAFTGPGFLMSIAYLDPGNIESDLQSGAVAGFKLLWVLLLATIVGLLLQRLAARLGVVTGLHLAEVCHRQYPKVPRIILWLMVELAIIGSDMQEVIGSAIAINLLSVGRVPLWGGVLITIADTFVFLFLDKYGLRKLEAFFGFLITIMALTFGYEYVTVKPSQSQVLKGMFLPSCSGCHTPQIEQAVGIVGAVIMPHNMYLHSALVKSRQINRANKQEVREANKYFFIESCIALFVSFIINVFVVSVFAEAFFEKTNDQVVAVCRNSSSPHSHLFPDDNSTLAVDIYKGGVVLGCYFGPAALYIWAVGILAAGQSSTMTGTYSGQFVME…
XP_025856112.1	MVLGPEQKMADDDASGDHGDSPSLGTLNPAYSNSSLPQSTEHSQEPFTTYFDEKIAIPEEEYSCFSFRKLWAFTGPGFLMSIAYLDPGNIESDLQSGAVAGFKLLWVLLLATIVGLLLQRLAARLGVVTGLHLAEVCHRQYPKVPRIILWLMVELAIIGSDMQEVIGSAIAINLLSVGRVPLWGGVLITIADTFVFLFLDKYGLRKLEAFFGFLITIMALTFGYEYVTVKPSQSQVLKGMFLPSCSGCHTPQIEQAVGIVGAVIMPHNMYLHSALVKSRQINRANKQEVREANKYFFIESCIALFVSFIINVFVVSVFAEAFFEKTNDQVVAVCRNSSSPHSHLFPDDNSTLAVDIYKGGVVLGCYFGPAALYIWAVGILAAGQSSTMTGTYSGQFVME…
XP_019274901.1	MKFDYALKGVVCLLKFPAVSLPTWCCPEQPKCPYLTKGGALVCIYTGRSRRLEKSNPACTMKKQLKKDEAPHCELKSYSKNLDTQSSTMVLGPEQKMPDDDASGDHGDSASLGTLNPAYSNSSLSQSTGHSQEPFTTYFDEKIAIPEEEYSCFSFRKLWAFTGPGFLMSIAYLDPGNIESDLQSGAVAGFKLLWVLLLATMVGLLLQRLAARLGVVTGLHLAEVCHRQYPRVPRIILWLMVELAIIGSDMQEVIGSAIAINLLSVGRVPLWGGVLITIADTFVFLFLDKYGLRKLEAFFGFLITIMALTFGYEYVTVKPSQSQVLKGMFLPSCPGCHTPQIEQAVGIVGAVIMPHNMYLHSALVKSRQVNRANKQEVREANKYFFIESCIALFVSFIIN…
XP_015397833.1	MKFDYALKGVVCLLKFPAVSLPTWCCPEQPKCPYLTKGGALVCIYTGRSRRSEKSNPACTMKKQPKKDEAPHCELKSYSKNLDTQSSTMVLGPEQKMPDDDASGDHGDPASLGTLNPAYSNSSLSQSTGHSQEPFTTYFDEKIAIPEEEYSCFSFRKLWAFTGPGFLMSIAYLDPGNIESDLQSGAVAGFKLLWVLLLATMVGLLLQRLAARLGVVTGLHLAEVCHRQYPRVPRIILWLMVELAIIGSDMQEVIGSAIAINLLSVGRVPLWGGVLITIADTFVFLFLDKYGLRKLEAFFGFLITIMALTFGYEYVTVKPSQSQVLKGMFLPSCPGCHTPQIEQAVGIVGAVIMPHNMYLHSALVKSRQVNRANKQEVREANKYFFIESCIALFVSFIIN…
XP_023112817.1	MKFDYALKGVVCLLKFPAVSLPTWCCPEPPKCPYLTKGGALVCIYTGRSRHSEKSNPACTMKKQPKKDEAPHCELKSYSKNLDTQSSTMVLGPEQKMPDDDASGDHGDPASLGTLNPAYSNSSLSQSTGHSQEPFTTYFDEKIAIPEEEYSCFSFRKLWAFTGPGFLMSIAYLDPGNIESDLQSGAVAGFKLLWVLLLATMVGLLLQRLAARLGVVTGLHLAEVCHRQYPRVPRIILWLMVELAIIGSDMQEVIGSAIAINLLSVGRVPLWGGVLITIADTFVFLFLDKYGLRKLEAFFGFLITIMALTFGYEYVTVKPSQSQVLKGMFLPSCPGCHTPQIEQAVGIVGAVIMPHNMYLHSALVKSRQVNRANKQEVREANKYFFIESCIALFVSFIIN…
XP_019274906.1	MKFDYALKGVVCLLKFPAVSLPTWCCPEQPKCPYLTKGGALVCIYTGRSRRLEKSNPACTMKKQLKKDEAPHCELKSYSKNLDTQSSTMVLGPEQKMPDDDASGDHGDSASLGTLNPAYSNSSLSQSTGHSQEPFTTYFDEKIAIPEEEYSCFSFRKLWAFTGPGFLMSIAYLDPGNIESDLQSGAVAGFKLLWVLLLATMVGLLLQRLAARLGVVTGLHLAEVCHRQYPRVPRIILWLMVELAIIGSDMQEVIGSAIAINLLSVGRVPLWGGVLITIADTFVFLFLDKYGLRKLEAFFGFLITIMALTFGYEYVTVKPSQSQVLKGMFLPSCPGCHTPQIEQAVGIVGAVIMPHNMYLHSALVKSRQVNRANKQEVREANKYFFIESCIALFVSFIIN…
XP_030178458.1	MKKQPKKDEAPHCELKSYSKNLDTQSSTMVLGPEQKMPDDDASGDHGDPASLGTLNPAYSNSSLSQSTGHSQEPFTTYFDEKIAIPEEEYSCFSFRKLWAFTGPGFLMSIAYLDPGNIESDLQSGAVAGFKLLWVLLLATMVGLLLQRLAARLGVVTGLHLAEVCHRQYPRVPRIILWLMVELAIIGSDMQEVIGSAIAINLLSVGRVPLWGGVLITIADTFVFLFLDKYGLRKLEAFFGFLITIMALTFGYEYVTVKPSQSQVLKGMFLPSCPGCHTPQIEQAVGIVGAVIMPHNMYLHSALVKSRQVNRANKQEVREANKYFFIESCIALFVSFIINVFVVSVFAEAFFEKTNDQVVAVCRNASSPHTSLFPDDNSTLAVDIYKGGVVLGCYFGPAA…
XP_026891936.1	MKKQPKKDEAPHCELKSYSKNLDTQSSTMVLGPEQKMPDDDASGDHGDPASLGTLNPAYSNSSLSQSPGHSQEPFTTYFDEKIAIPEEEYSCFSFRKLWAFTGPGFLMSIAYLDPGNIESDLQSGAVAGFKLLWVLLLATMVGLLLQRLAARLGVVTGLHLAEVCHRQYPRVPRIILWLMVELAIIGSDMQEVIGSAIAINLLSVGRVPLWGGVLITIADTFVFLFLDKYGLRKLEAFFGFLITIMALTFGYEYVTVKPSQSQVLKGMFLPSCPGCHTPQIEQAVGIVGAVIMPHNMYLHSALVKSRQVNRANKQEVREANKYFFIESCIALFVSFIINVFVVSVFAEAFFEKTNDQVVAVCRNASSPHTSLFPDDNSTLAVDIYKGGVVLGCYFGPAA…
VFV44684.1	MKKQPKKDEAPHCELKSYSKNLDTQSSTMVLGPEQKMPDDDASGDHGDPASLGTLNPAYSNSSLSQSTGHSQEPFTTYFDEKIAIPEEEYSCFSFRKLWAFTGPGFLMSIAYLDPGNIESDLQSGAVAGFKLLWVLLLATMVGLLLQRLAARLGVVTGLHLAEVCHRQYPRVPRIILWLMVELAIIGSDMQEVIGSAIAINLLSVGRVPLWGGVLITIADTFVFLFLDKYGLRKLEAFFGFLITIMALTFGYEYVTVKPSQSQVLKGMFLPSCPGCHTPQIEQAVGIVGAVIMPHNMYLHSALVKSRQVNRANKQEVREANKYFFIESCIALFVSFIINVFVVSVFAEAFFEKTNDQVVAVCRNASSPHTSLFPDDNSTLAVDIYKGGVVLGCYFGPAA…
XP_026891943.1	MVLGPEQKMPDDDASGDHGDPASLGTLNPAYSNSSLSQSPGHSQEPFTTYFDEKIAIPEEEYSCFSFRKLWAFTGPGFLMSIAYLDPGNIESDLQSGAVAGFKLLWVLLLATMVGLLLQRLAARLGVVTGLHLAEVCHRQYPRVPRIILWLMVELAIIGSDMQEVIGSAIAINLLSVGRVPLWGGVLITIADTFVFLFLDKYGLRKLEAFFGFLITIMALTFGYEYVTVKPSQSQVLKGMFLPSCPGCHTPQIEQAVGIVGAVIMPHNMYLHSALVKSRQVNRANKQEVREANKYFFIESCIALFVSFIINVFVVSVFAEAFFEKTNDQVVAVCRNASSPHTSLFPDDNSTLAVDIYKGGVVLGCYFGPAALYIWAVGILAAGQSSTMTGTYSGQFVME…
XP_019274907.1	MVLGPEQKMPDDDASGDHGDSASLGTLNPAYSNSSLSQSTGHSQEPFTTYFDEKIAIPEEEYSCFSFRKLWAFTGPGFLMSIAYLDPGNIESDLQSGAVAGFKLLWVLLLATMVGLLLQRLAARLGVVTGLHLAEVCHRQYPRVPRIILWLMVELAIIGSDMQEVIGSAIAINLLSVGRVPLWGGVLITIADTFVFLFLDKYGLRKLEAFFGFLITIMALTFGYEYVTVKPSQSQVLKGMFLPSCPGCHTPQIEQAVGIVGAVIMPHNMYLHSALVKSRQVNRANKQEVREANKYFFIESCIALFVSFIINVFVVSVFAEAFFEKTNDQVVAVCRNASSPHTSLFPDDNSTLAVDIYKGGVVLGCYFGPAALYIWAVGILAAGQSSTMTGTYSGQFVME…
XP_029810141.1	MAEPPAGPAAAPEPVIQESYSKNLDTQASTMVLGPERKTPDDDASGDHGDSGSLGTLNPAYSNSSLSQATGHSQEPFTTYFDEKIAIPEEEYSCFSFRKLWAFTGPGFLMSIAYLDPGNIESDLQSGAVAGFKLLWVLLLATLVGLLLQRLAARLGVVTGLHLAEVCHRQYPRVPRIILWLMVELAIIGSDMQEVIGSAIAINLLSVGRVPLWGGVLITIADTFVFLFLDKYGLRKLEAFFGFLITIMALTFGYEYVTVKPSQSQVLKGMFLPSCPGCHTPQIEQAVGIVGAVIMPHNMYLHSALVKSRQVNRANKQEIREANKYFFIESCIALFVSFIINVFVVSVFAEAFFEKTNDQVVAVCRNASSPHAGLFPDDNSTLAVDIYKGGVVLGCYFGP…
XP_029810140.1	MKKQPKKDEAPHCELKSYSKNLDTQASTMVLGPERKTPDDDASGDHGDSGSLGTLNPAYSNSSLSQATGHSQEPFTTYFDEKIAIPEEEYSCFSFRKLWAFTGPGFLMSIAYLDPGNIESDLQSGAVAGFKLLWVLLLATLVGLLLQRLAARLGVVTGLHLAEVCHRQYPRVPRIILWLMVELAIIGSDMQEVIGSAIAINLLSVGRVPLWGGVLITIADTFVFLFLDKYGLRKLEAFFGFLITIMALTFGYEYVTVKPSQSQVLKGMFLPSCPGCHTPQIEQAVGIVGAVIMPHNMYLHSALVKSRQVNRANKQEIREANKYFFIESCIALFVSFIINVFVVSVFAEAFFEKTNDQVVAVCRNASSPHAGLFPDDNSTLAVDIYKGGVVLGCYFGPAA…
XP_007073084.1	MVLGPEQKMPDDDASGDHGDPASLGTLNPAYSNSSLSQSTGHSQEPFTTYFDEKIAIPEEEYSCFSFRKLWAFTGPGFLMSIAYLDPGNIESDLQSGAVAGFKLLWVLLLATMVGLLLQRLAARLGVVTGLHLAEVCHRQYPRVPRIILWLMVELAIIGSDMQEVIGSAIAINLLSVGRVPLWGGVLITIADTFVFLFLDKYGLRKLEAFFGFLITIMALTFGYEYVTVKPSQSQVLKGMFLPSCPGCHTPQIEQAVGIVGAVIMPHNMYLHSALVKSRQVNRANKQEVREANKYFFIESCIALFVSFIINVFVVSVFAEAFFEKTNDQVVAVCRNASSPHTSLFPDDNSTLAVDIYKGGVVLGCYFGPAALYIWAVGILAAGQSSTMTGTYSGQFVME…
XP_029810142.1	MVLGPERKTPDDDASGDHGDSGSLGTLNPAYSNSSLSQATGHSQEPFTTYFDEKIAIPEEEYSCFSFRKLWAFTGPGFLMSIAYLDPGNIESDLQSGAVAGFKLLWVLLLATLVGLLLQRLAARLGVVTGLHLAEVCHRQYPRVPRIILWLMVELAIIGSDMQEVIGSAIAINLLSVGRVPLWGGVLITIADTFVFLFLDKYGLRKLEAFFGFLITIMALTFGYEYVTVKPSQSQVLKGMFLPSCPGCHTPQIEQAVGIVGAVIMPHNMYLHSALVKSRQVNRANKQEIREANKYFFIESCIALFVSFIINVFVVSVFAEAFFEKTNDQVVAVCRNASSPHAGLFPDDNSTLAVDIYKGGVVLGCYFGPAALYIWAVGILAAGQSSTMTGTYSGQFVME…
XP_023112825.1	MKFDYALKGVVCLLKFPAVSLPTWCCPEPPKCPYLTKGGALVCIYTGRSRHSEKSNPACTMKKQPKKDEAPHCELKSYSKNLDTQSSTMVLGPEQKMPDDDASGDHGDPASLGTLNPAYSNSSLSQSTGHSQEPFTTYFDEKIAIPEEEYSCFSFRKLWAFTGPGFLMSIAYLDPGNIESDLQSGAVAGFKLLWVLLLATMVGLLLQRLAARLGVVTGLHLAEVCHRQYPRVPRIILWLMVELAIIGSDMQEVIGSAIAINLLSVGRVPLWGGVLITIADTFVFLFLDKYGLRKLEAFFGFLITIMALTFGYEYVTVKPSQSQVLKGMFLPSCPGCHTPQIEQAVGIVGAVIMPHNMYLHSALVKSRQVNRANKQEVREANKYFFIESCIALFVSFIIN…
XP_023112826.1	MSKNDSLNDASGDHGDPASLGTLNPAYSNSSLSQSTGHSQEPFTTYFDEKIAIPEEEYSCFSFRKLWAFTGPGFLMSIAYLDPGNIESDLQSGAVAGFKLLWVLLLATMVGLLLQRLAARLGVVTGLHLAEVCHRQYPRVPRIILWLMVELAIIGSDMQEVIGSAIAINLLSVGRVPLWGGVLITIADTFVFLFLDKYGLRKLEAFFGFLITIMALTFGYEYVTVKPSQSQVLKGMFLPSCPGCHTPQIEQAVGIVGAVIMPHNMYLHSALVKSRQVNRANKQEVREANKYFFIESCIALFVSFIINVFVVSVFAEAFFEKTNDQVVAVCRNASSPHTSLFPDDNSTLAVDIYKGGVVLGCYFGPAALYIWAVGILAAGQSSTMTGTYSGQFVMEGFLN…
VCX10139.1	MVLGPEQKMPDDDVSGDHGDSPRLGALNPAYSTSSLPPSEEHSQEPFTTYFDEKITIPEEEYSCFSFRKLWAFTGPGFLMSIAYLDPGNIESDLQSGAVAGFKLLWVLLLATVVGLLLQRLAARLGVVTGLHLAEVCHRQYPKVPRIILWLMVELAIIGSDMQEVIGSAIAINLLSVGRVPLWGGVLITIADTFVFLFLDKYGLRKLEAFFGFLITIMALTFGYEYVTVKPSQSQVLKGMFLPSCSGCHTPQIEQAVGIVGAVIMPHNMYLHSALVKSRQVNRANKQEVREANKYFFIESCIALFVSFIINVFVVSVFAEAFFEKTNDQVIAVCRNNSSPHTHLFPDDNSTLAVDIYKGGVVLGCYFGPAALYIWAVGILAAGQSSTMTGTYSGQFVME…
XP_004400881.1	MVLGPEQKMPDDDVSADHGDSPSLGTLNPAYSTSSLPRSTEHSQEPFTTYFDEKITIPEEEYSCFSFRKLWAFTGPGFLMSIAYLDPGNIESDLQSGAVAGFKLLWVLLLATVVGLLLQRLAARLGVVTGLHLAEVCHRQYPKVPRIILWLMVELAIIGSDMQEVIGSAIAINLLSVGRVPLWGGVLITIADTFVFLFLDKYGLRKLEAFFGFLITIMALTFGYEYITVKPSQSQVLKGMFLPSCSGCHTPQVEQAVGIVGAVIMPHNMYLHSALVKSRQVNRANKQEVREANKYFFIESCIALFVSFIINVFVVSVFAEAFFEKTNDQVIAVCRNNSSPHTHLFPDDNSTLAVDIYKGGVVLGCYFGPAALYIWAVGILAAGQSSTMTGTYSGQFVME…
XP_027451176.1	MGMCNCRPVGQSRGVWGLARLALAPGIWSCQREGILSGGCGAESYSKYLDTQASTMVLGPEQKMPDDDVSGDHGDSPSLGTLNPAYSTSSLPRSTEHSQEPFTTYFDEKITIPEEEYSCFSFRKLWAFTGPGFLMSIAYLDPGNIESDLQSGAVAGFKLLWVLLLATVVGLLLQRLAARLGVVTGLHLAEVCHRQYPKVPRIILWLMVELAIIGSDMQEVIGSAIAINLLSVGRVPLWGGVLITIADTFVFLFLDKYGLRKLEAFFGFLITIMALTFGYEYITVKPSQSQVLKGMFLPSCSGCHTPQVEQAVGIVGAVIMPHNMYLHSALVKSRQVNRANKQEVREANKYFFIESCIALFVSFIINVFVVSVFAEAFFEKTNDQVIAVCRNNSSPHTHL…
XP_025856111.1	MVLGPEQKMADDDASGDHGDSPSLGTLNPAYSNSSLPQSTEHSQEPFTTYFDEKIAIPEEEYSCFSFRKLWAFTGPGFLMSIAYLDPGNIESDLQSGAVAGFKLLWVLLLATIVGLLLQRLAARLGVVTGLHLAEVCHRQYPKVPRIILWLMVELAIIGSDMQEVIGSAIAINLLSVGRVPLWGGVLITIADTFVFLFLDKYGLRKLEAFFGFLITIMALTFGYEYVTVKPSQSQVLKGMFLPSCSGCHTPQIEQAVGIVGAVIMPHNMYLHSALVKSRQINRANKQEVREANKYFFIESCIALFVSFIINVFVVSVFAEAFFEKTNDQVVAVCRNSSSPHSHLFPDDNSTLAVDIYKGGVVLGCYFGPAALYIWAVGILAAGQSSTMTGTYSGQFVME…
XP_012378827.2	MKKKQLKTEAAPHCELKSYSKNSGIQVSTMVLGPEQKMPDDDASGEHGDTASLGAINPAYSNSSLHQSTGPSEEPFTTYFDEKIAIPEEEEYSCFSFRKLWAFTGPGFLMSIAYLDPGNIESDLQSGAVAGFKLLWVLLLATIVGLLLQRLAARLGVVTGLHLAEVCHRQYPKVPRIILWLMVELAIIGSDMQEVIGSAIAINLLSVGRVPLWGGVLITIADTFVFLFLDKYGLRKLEAFFGFLITIMALTFGYEYVTVKPDQSQVLKGMFVPSCSGCHTPQVEQAVGIVGAVIMPHNMYLHSALVKSRQVNRANKQEVREANKYFFIESCIALFVSFIINVFVVSVFAEAFFERRNEQVVAVCRNGSSPHADLFPDDNSTLTVDIYKGGVVLGCYFGP…
XP_004453731.1	MVLGPEQKMPDDDASGEHGDTASLGAINPAYSNSSLHQSTGPSEEPFTTYFDEKIAIPEEEEYSCFSFRKLWAFTGPGFLMSIAYLDPGNIESDLQSGAVAGFKLLWVLLLATIVGLLLQRLAARLGVVTGLHLAEVCHRQYPKVPRIILWLMVELAIIGSDMQEVIGSAIAINLLSVGRVPLWGGVLITIADTFVFLFLDKYGLRKLEAFFGFLITIMALTFGYEYVTVKPDQSQVLKGMFVPSCSGCHTPQVEQAVGIVGAVIMPHNMYLHSALVKSRQVNRANKQEVREANKYFFIESCIALFVSFIINVFVVSVFAEAFFERRNEQVVAVCRNGSSPHADLFPDDNSTLTVDIYKGGVVLGCYFGPAALYIWAVGILAAGQSSTMTGTYSGQFVM…
XP_030690926.1	MVLGPEQKTPDEDASGDHGDSASLGAINPAYSNSSLPQSPGGHSEDAFTTYFDEKIAIPQEEYSCFSFRKLWAFTGPGFLMSIAYLDPGNIESDLQSGAVAGFKVPRIILWLMVELAIVGSDMQEVIGAAIAINLLSAGRVPLWGGVLITIADTFVFLFLDKYGLRKLEAFFGFLITVMALTFGYEYVTVKPSQIQVLKGMFLPSCSGCRTPQIEQAVGTVGAVIMPHNMYLHSALVKSRQVDRANKEEVREANKYFFIESCIALFVSFIINVFVVSVFAEAFFEKTNEQVVEACRSISSPHTHLFPDDNSTLAVDIYKGGVVLGCYFGPAALYIWAVGILAAGQSSTMTGTYSGQFVMEGFLNLKWSRFARVILTRSIAIIPTLLVAVFQDVEHLTGM…
XP_030690928.1	MVLGPEQKTPDEDASGDHGDSASLGAINPAYSNSSLPQSPGGHSEDAFTTYFDEKIAIPQEEYSCFSFRKLWAFTGPGFLMSIAYLDPGNIESDLQSGAVAGFKLLWVLLMATIVGLLLQRLAARLGVVTGLHLAEMCHRQYPRVPRIILWLMVELAIVGSDMQEVIGAAIAINLLSAGRVPLWGGVLITIADTFVFLFLDKYGLRKLEAFFGFLITVMALTFGYEYVTVKPSQIQVLKGMFLPSCSGCRTPQIEQAVGTVGAVIMPHNMYLHSALVKSRQVDRANKEEVREANKYFFIESCIALFVSFIINVFVVSVFAEAFFEKTNEQVVEACRSISSPHTHLFPDDNSTLAVDIYKGGVVLGCYFGPAALYIWAVGILAAGQSSTMTGTYSGQFVM…
KAB0378598.1	DASGDHGDSASLGAINPAYSNSSIPQSPGAGSADPFTTYFDEKIAIPEEEYSCFSFRKLWAFTGPGFLMSIAYLDPGNIESDLQSGAVAGFKLLWVLLLATIVGLLLQRLAARLGVVTGLHLAEVCHRQYPRVPRIILWLMVELAIIGSDMQEVIGSAIAINLLSLGRVPLWGGVLITIADTFVFLFLDKYGLRKLEAFFGFLITIMALTFGYEYVTVKPSQTQVLKGMFLPSCSGCRTPQIEQAVGIVGAVIMPHNMYLHSALVKSRQVDRANKQEVREANKYFFIESCIALFVSFIINVFVVSVFAEAFFGKTNEQVVAVCKNSSSPHTHLFPEDNSTLAVDIYKGGVVLGCYFGPAALYIWAVGILAAGQSSTMTGTYSGQFVMEGFLNLKWSRFA…
KAB0361075.1	DASGDHGDSASLGAINPAYSNSSIPQSPGAGSADPFTTYFDEKIAIPEEEYSCFSFRKLWAFTGPGFLMSIAYLDPGNIESDLQSGAVAGFKLLWVLLLATIVGLLLQRLAARLGVVTGLHLAEVCHRQYPRVPRIILWLMVELAIIGSDMQEVIGSAIAINLLSLGRVPLWGGVLITIADTFVFLFLDKYGLRKLEAFFGFLITIMALTFGYEYVTVKPSQTQVLKGMFLPSCSGCRTPQIEQAVGIVGAVIMPHNMYLHSALVKSRQVDRANKQEVREANKYFFIESCIALFVSFIINVFVVSVFAEAFFGKTNEQVVAVCKNSSSPHTHLFPEDNSTLAVDIYKGGVVLGCYFGPAALYIWAVGILAAGQSSTMTGTYSGQFVMEGFLNLKWSRFA…
EFB24324.1	DDASGDHGDSPSLGTLNPAYSSSSLPQSAEHSQEPFTTYFDEKIAIPEEEHSCFSFRKLWAFTGPGFLMSIAYLDPGNIESDLQSGAVAGFKLLWVLLLATIVGLLLQRLAARLGVVTGLHLAEVCHRQYPKVPRIILWLMVELAIIGSDMQEVIGSAIAINLLSVGRVPLWGGVLITIADTFVFLFLDKYGLRKLEAFFGFLITIMALTFGYEAMKPSQSQVLKGMFLPSCSGCHTPQIEQAVGIVGAVIMPHNMYLHSALVKSRQVNRANKQEVREANKYFFIESCIALFVSFIINVFVVSVFAEAFFEKTNNQVIAVCRNNSSPHTHLFPDDNSTLAVDIYKGGVVLGCYFGPAALYIWAVGILAAGQSSTMTGTYSGQFVMEGFLNLKWSRFARV…
XP_017523047.1	MKKERQTEAAPHCELKSYSKNSGTQVSTMVLGPEQKLPDDDTSGDGGDSASLGAVNPAYSDSSLPQSSGRAEEPFTTYFDEKITIPEEHSCFSFRKLWAFTGPGFLMSIAYLDPGNIESDLQSGAVAGFKLLWVLLLATIVGLLLQRLAARLGVVTGLHLAEVCHRQYPKVPRIILWLMVELAIIGSDMQEVIGSAIAINLLSVGRIPLWGGVLITIADTFVFLFLDKYGLRKLEAFFGFLITVMALTFGYEYVTVKPSQSQVLKGMFVPSCSGCRTPQIEQAVGIVGAVIMPHNMYLHSALVKSRQVNRASKQEVQEANKYFFIESCIALFVSFIINVFVVSVFGEAFFEKTNNQVVEVCRNSSSSHTSLFPDDNSTLAVDIYKGGVVLGCYFGPAAL…
XP_017523038.1	MKKERQTEAAPHCELKSYSKNSGTQVSTMVLGPEQKLPDDDTSGDGGDSASLGAVNPAYSDSSLPQSSGRAEEPFTTYFDEKITIPEEHSCFSFRKLWAFTGPGFLMSIAYLDPGNIESDLQSGAVAGFKLLWVLLLATIVGLLLQRLAARLGVVTGLHLAEVCHRQYPKVPRIILWLMVELAIIGSDMQEVIGSAIAINLLSVGRIPLWGGVLITIADTFVFLFLDKYGLRKLEAFFGFLITVMALTFGYEYVTVKPSQSQVLKGMFVPSCSGCRTPQIEQAVGIVGAVIMPHNMYLHSALVKSRQVNRASKQEVQEANKYFFIESCIALFVSFIINVFVVSVFGEAFFEKTNNQVVEVCRNSSSSHTSLFPDDNSTLAVDIYKGGVVLGCYFGPAAL…
XP_017523056.1	MVLGPEQKLPDDDTSGDGGDSASLGAVNPAYSDSSLPQSSGRAEEPFTTYFDEKITIPEEHSCFSFRKLWAFTGPGFLMSIAYLDPGNIESDLQSGAVAGFKLLWVLLLATIVGLLLQRLAARLGVVTGLHLAEVCHRQYPKVPRIILWLMVELAIIGSDMQEVIGSAIAINLLSVGRIPLWGGVLITIADTFVFLFLDKYGLRKLEAFFGFLITVMALTFGYEYVTVKPSQSQVLKGMFVPSCSGCRTPQIEQAVGIVGAVIMPHNMYLHSALVKSRQVNRASKQEVQEANKYFFIESCIALFVSFIINVFVVSVFGEAFFEKTNNQVVEVCRNSSSSHTSLFPDDNSTLAVDIYKGGVVLGCYFGPAALYIWAVGILAAGQSSTMTGTYSGQFVMEG…
XP_003939214.1	MSKDNSLNSVSGEHGESASLGTFNPAYSNPSLPQSSGNSEDEFTTYFNEKISIPEEEYSCFSFRKLWAFTGPGFLMSIAYLDPGNIESDLQSGAVAGFKLLWILLLATLVGLLLQRLAARLGVVTGLHLAEVCHRQYPKVPRIILWLMVELAIIGSDMQEVIGSAIAINLLSVGRIPLWGGVLITIADTFVFLFLDKYGLRKLEAFFGFLITIMALTFGYEYVTVKPSQSQVLKGMFVPSCSGCRTPQIEQAVGIVGAVIMPHNMYLHSALVKSRQINRSNKQEIREANKYFFIESCIALFVSFIINVFVVSVFAEAFFGKTNEQVVEVCTNSSSPHAGLFPNDNSTLAVDIYKGGVVLGCYFGPAALYIWAVGILAAGQSSTMTGTYSGQFVMEGFLN…
XP_006168211.1	MVLSPEQKMPEDNASGDHEDSASFGAINFAYSNSSLPQSTGQPEEPFATYFDEKITIPEEEYSCFSFRKLWAFTGPGFLMSIAYLDPGNIESDLQSGAVAGFKLLWVLLLATIVGLLLQRLAARLGVVTGLHLAEVCHRQYPKVPRIILWLMVELAIIGSDMQEVIGSAIAINLLSVGRVPLWGGVLITIADTFVFLFLDKYGLRKLEAFFGFLITIMALTFGYEYVTVKPSQSQVLRGMFVPSCSGCRTPQIEQAVGIVGAVIMPHNMYLHSALVKSRQVNRANKQEVREANKYFFIESCIALFVSFIINVFVVSVFAEAFFGKTNDQVVEVCRNSSSPHAGLFPNDNSTLAVDIYKGGVVLGCYFGPAALYIWAVGILAAGQSSTMTGTYSGQFVME…
XP_027623936.1	MVLSPEQKMPEDNASGDHEDSASFGAINFAYSNSSLPQSTGQPEEPFATYFDEKITIPEEEYSCFSFRKLWAFTGPGFLMSIAYLDPGNIESDLQSGAVAGFKLLWVLLLATIVGLLLQRLAARLGVVTGLHLAEVCHRQYPKVPRIILWLMVELAIIGSDMQEVIGSAIAINLLSVGRVPLWGGVLITIADTFVFLFLDKYGLRKLEAFFGFLITIMALTFGYEYVTVKPSQSQVLRGMFVPSCSGCRTPQIEQAVGIVGAVIMPHNMYLHSALVKSRQVNRANKQEVREANKYFFIESCIALFVSFIINVFVVSVFAEAFFGKTNDQVVEVCRNSSSPHAGLFPNDNSTLAVDIYKGGVVLGCYFGPAALYIWAVGILAAGQSSTMTGTYSGQFVME…
XP_008567204.1	MVLGPEQKMSDDNASGDHGDSASLGAINPAYSNSSLSQSTGHSDEPFATYFDEKITIPKEEYSCFSFRKLWAFTGPGFLMSIAYLDPGNIESDLQSGAVAGFKLLWILLLSTIVGLLLQRLAARLGVVTGLHLAEVCHRQYPKVPRIILWLMVELAIIGSDMQEVIGSAIAINLLSVGRVPLWGGVLITIADTFVFLFLDKYGLRKLEAFFGFLITVMALTFGYEYVTVKPSQSQVLKGMFVPSCSGCRTPQIEQAVGIVGAVIMPHNMYLHSALVKSRQVNRANKQEVQEANKYFFIESCIALFVSFIINVFVVSVFAEAFFEKTNEQVVEVCKNSSSPHAGLFPNDNSTLAVDIYKGGVVLGCYFGPAALYIWAVGILAAGQSSTMTGTYSGQFVME…
XP_007452368.1	MSPGGHSEEPFTTYFDEKIAIPEEEYSCFSFRKLWAFTGPGFLMSIAYLDPGNIESDLQSGAVAGFKLLWVLLMATIVGLLLQRLAARLGVVTGLHLAEVCHRQYPRVPRIILWLMVELAIVGSDMQEVIGSAIAINLLSVGRVPLWGGVLITIADTFVFLFLDKYGLRKLEAFFGFLITIMALTFGYEYVTVKPSQTQVLKGMFLPSCSGCHTPQIEQAVGIVGAVIMPHNMYLHSALVKSRQVDRANKEEVREANKYFFIESCIALFVSFIINVFVVSVFAEAFFEKTNEQVVEVCRNSSSPHTHLFPDDNSTLAVDIYKGGVVLGCYFGPAALYIWAVGILAAGQSSTMTGTYSGQFVMEGFLNLKWSRFARVILTRSIAIIPTLLVAVFQDVEHL…
XP_004274374.1	MSPGGHSEDAFTTYFDEKIAIPQEEYSCFSFRKLWAFTGPGFLMSIAYLDPGNIESDLQSGAVAGFKLLWVLLMATIVGLLLQRLAARLGVVTGLHLAEMCHRQYPRVPRIILWLMVELAIVGSDMQEVIGSAIAINLLSAGRVPLWGGVLITIADTFVFLFLDKYGLRKLEAFFGFLITIMALTFGYEYVTVKPSQIQVLKGMFLPSCSGCRTPQIEQAVGIVGAVIMPHNMYLHSALVKSRQVDRANKEEVREANKYFFIESCIALFVSFIINVFVVSVFAEAFFEKTNEQVVEACRSISSPHTHLFPDDNSTLAVDIYKGGVVLGCYFGPAALYIWAVGILAAGQSSTMTGTYSGQFVMEGFLNLKWSRFARVILTRSIAIIPTLLVAVFQDVEHL…
BAH14358.1	MSPGDSEEYFATYFNEKISIPEEEYSCFSFRKLWAFTGPGFLMSIAYLDPGNIESDLQSGAVAGFKLLWILLLATLVGLLLQRLAARLGVVTGLHLAEVCHRQYPKVPRVILWLMVELAIIGSDVQEVIGSAIAINLLSVGRIPLWGGVLITIADTFVFLFLDKYGLRKLEAFFGFLITIMALTFGYEYVTVKPSQSQVLKGMFVPSCSGCRTPQIEQAVGIVGAVIMPHNMYLHSALVKSRQVNRNNKQEVREANKYFFIESCIALFVSFIINVFVVSVFAEAFFGKTNEQVVEVCTNTSSPHAGLFPKDNSTLAVDIYKGGVVLGCYFGPAALYIWAVGILAAGQSSTMTGTYSGQFVMEGFLNLKWSRFARVVLTRSIAIIPTLLVAVFQDVEHLT…
XP_027805798.1	MVLGPEQTMPDDSASGDHGDSASLGAINAAYSNSSLPQSTGQSEEPFTTYFDEKIAIPEEEYSCFSFRKLWAFTGPGFLMSIAYLDPGNIESDLQSGAVAGFKLLWVLLLATIVGLLLQRLAARLGVVTGLHLAEVCHRQYPKVPRIILWLMVELAIIGSDMQEVIGSAIAINLLSVGRVPLWGGVLITIADTFVFLFLDKYGLRKLEAFFGFLITVMALTFGYEYITVKPSQSQVLKGMFVPSCSGCKTPQIEQAVGIVGAVIMPHNMYLHSALVKSRQVNRANKQEVREANKYFFIESCIALFVSFIINVFVVSVFAEAFFGKTNEQVVDVCKNSSSPHAGLFPEDNSTLAVDIYKGGVVLGCYFGPAALYIWAVGILAAGQSSTMTGTYSGQFVME…
XP_015348841.1	MVLGPEQTMPDDSASGDHGDSASLGAINAAYSNSSLPQSTGQSEEPFTTYFDEKIAIPEEEYSCFSFRKLWAFTGPGFLMSIAYLDPGNIESDLQSGAVAGFKLLWVLLLATIVGLLLQRLAARLGVVTGLHLAEVCHRQYPKVPRIILWLMVELAIIGSDMQEVIGSAIAINLLSVGRVPLWGGVLITIADTFVFLFLDKYGLRKLEAFFGFLITVMALTFGYEYITVKPSQSQVLKGMFVPSCSGCKTPQIEQAVGIVGAVIMPHNMYLHSALVKSRQVNRANKQEVREANKYFFVESCIALFVSFIINVFVVSVFAEAFFGKTNEQVVDVCKNSSSPHAGLFPEDNSTLAVDIYKGGVVLGCYFGPAALYIWAVGILAAGQSSTMTGTYSGQFVME…
XP_005325007.1	MVLGPEQTMPDDSASGDHGDSASLGAINAAYSNSSLPQSTGQSEEPFTTYFDEKIAIPEEEYSCFSFRKLWAFTGPGFLMSIAYLDPGNIESDLQSGAVAGFKLLWVLLLATIVGLLLQRLAARLGVVTGLHLAEVCHRQYPKVPRIILWLMVELAIIGSDMQEVIGSAIAINLLSVGRVPLWGGVLITIADTFVFLFLDKYGLRKLEAFFGFLITVMALTFGYEYITVKPSQSQVLKGMFVPSCSGCKTPQIEQAVGIVGAVIMPHNMYLHSALVKSRQVNRANKQEVREANKYFFIESCIALFVSFIINVFVVSVFAEAFFGKTNEQVVDVCKNSSSPYAGLFPEDNSTLAVDIYKGGVVLGCYFGPAALYIWAVGILAAGQSSTMTGTYSGQFVME…
XP_026254586.1	MVLGPEQTMPDDSASGDHGDSASLGAINAAYSNSSLPQSTGQSEEPFTTYFDEKIAIPEEEYSCFSFRKLWAFTGPGFLMSIAYLDPGNIESDLQSGAVAGFKLLWVLLLATIVGLLLQRLAARLGVVTGLHLAEVCHRQYPKVPRIILWLMVELAIIGSDMQEVIGSAIAINLLSVGRVPLWGGVLITIADTFVFLFLDKYGLRKLEAFFGFLITVMALTFGYEYITVKPSQSEVLKGMFVPSCSGCKTPQIEQAVGIVGAVIMPHNMYLHSALVKSRQVNRANKQEVREANKYFFIESCIALFVSFIINVFVVSVFAEAFFGKTNEQVVDVCKNSSSPYAGLFPEDNSTLAVDIYKGGVVLGCYFGPAALYIWAVGILAAGQSSTMTGTYSGQFVME…
VTJ53563.1	MGICSCSPIGQSQEGRGLAFLAVAPGIWSRRCWGGVSGGGRTESYSKNTGTQVSTMVLGPEQTMPDDSASGDHGDSASLGAINAAYSNSSLPQSTGQSEEPFTTYFDEKIAIPEEEYSCFSFRKLWAFTGPGFLMSIAYLDPGNIESDLQSGAVAGFKLLWVLLLATIVGLLLQRLAARLGVVTGLHLAEVCHRQYPKVPRIILWLMVELAIIGSDMQEVIGSAIAINLLSVGRVPLWGGVLITIADTFVFLFLDKYGLRKLEAFFGFLITVMALTFGYEYITVKPSQSQVLKGMFVPSCSGCKTPQIEQAVGIVGAVIMPHNMYLHSALVKSRQVNRANKQEVREANKYFFIESCIALFVSFIINVFVVSVFAEAFFGKTNEQVVDVCKNSSSPHAGL…
XP_020035490.1	MKSRWSQGQVFLSTSKQTEKLNSESFSRNTGTQVSTMVLGPEQKMPDDDASGDHGDSASIGAINPAYSSSSLSQSLENSEEPFATYFDEKIAIPEEEYSCFSFRKLWAFTGPGFLMSIAYLDPGNIESDLQSGAVAGFKLLWVLLLATIVGLLLQRLAARLGVVTGLHLAEVCHRQYPKIPRIILWLMVELAIIGSDMQEVIGSAIAINLLSAGRVPLWGGVLITIADTFVFLFLDKYGLRKLEAFFGFLITIMALTFGYEYITVKPSQSQVLRGMFVPSCSNCSTRQIEQAVGIVGAVIMPHNMYLHSALVKSRQVNRANKQEVREANKYFFIESCIALFVSFIINVFVVSVFAEAFFGRTNEQVVSVCKNSSSPHADLFPEDNSTLAVDIYKGGVVL…
XP_020035491.1	MVLGPEQKMPDDDASGDHGDSASIGAINPAYSSSSLSQSLENSEEPFATYFDEKIAIPEEEYSCFSFRKLWAFTGPGFLMSIAYLDPGNIESDLQSGAVAGFKLLWVLLLATIVGLLLQRLAARLGVVTGLHLAEVCHRQYPKIPRIILWLMVELAIIGSDMQEVIGSAIAINLLSAGRVPLWGGVLITIADTFVFLFLDKYGLRKLEAFFGFLITIMALTFGYEYITVKPSQSQVLRGMFVPSCSNCSTRQIEQAVGIVGAVIMPHNMYLHSALVKSRQVNRANKQEVREANKYFFIESCIALFVSFIINVFVVSVFAEAFFGRTNEQVVSVCKNSSSPHADLFPEDNSTLAVDIYKGGVVLGCYFGPAALYIWAVGILAAGQSSTMTGTYSGQFVME…
AOW69648.1	MVLGPEQKMPDDDASGDHGDSASIGAINPAYSSSSLSQSLENSEEPFATYFDEKIAIPEEEYSCFSFRKLWAFTGPGFLMSIAYLDPGNIESDLQSGAVAGFKLLWVLLLATIVGLLLQRLAARLGVVTGLHLAEVCHRQYPKIPRIILWLMVELAIIGSDMQEVIGSAIAINLLSAGRVPLWGGVLITIADTFVFLFLDKYGLRKLEAFFGFLITIMALTFGYEYITVKPSQSQVLRGMFVPSCSNCSTRQIEQAVGIVGAVIMPHNMYLHSALVKSRQVNRANKQEVREANKYFFIESCIALFVSFIINVFVVSVFAEAFFGRTNEQVVSVCKNSSSPHADLFPEDNSTLAVDIYKGGVVLGCYFGPAALYIWAVGILAAGQSSTMTGTYSGQFVME…
XP_014702874.1	MKKQLKTEAAPHCELKSYSKNSGTQVSTMVLGPEQKMPDDDASGDHGDSASLGAINSAYSNSSLPQSTGHSEEPFTTYFDEKIAIPEEEYSCFSFRKLWAFTGPGFLMSIAYLDPGNIESDLQSGAVAGFKLLWILLLATIVGLLLQRLAARLGVVTGLHLAEVCHRQYPRVPRIILWLMVELAIIGSDMQEVIGSAIAINLLSMGRVPLWGGVLITIADTFVFLFLDKYGLRKLEAFFGFLITVMALTFGYEYITVRPSQSQVLKGMFVPGCSGCRTPQIEQAVGIVGAVIMPHNMYLHSALVKSRQINRANKREIREANKYFFIESCIALFVSFIINVFVVSVFAEAFFEKTNEQVVEVCRNSSSPHTHLFPNDNTTLAVDIYKGGVVLGCYFGPAT…
XP_005611233.2	MKKQLKTEAAPHCELKSYSKNSGTQVSTMVLGPEQKMPDDDASGDHGDSASLGAINSAYSNSSLPQSTGHSEEPFTTYFDEKIAIPEEEYSCFSFRKLWAFTGPGFLMSIAYLDPGNIESDLQSGAVAGFKLLWILLLATIVGLLLQRLAARLGVVTGLHLAEVCHRQYPRVPRIILWLMVELAIIGSDMQEVIGSAIAINLLSMGRVPLWGGVLITIADTFVFLFLDKYGLRKLEAFFGFLITVMALTFGYEYITVRPSQSQVLKGMFVPGCSGCRTPQIEQAVGIVGAVIMPHNMYLHSALVKSRQINRANKREIREANKYFFIESCIALFVSFIINVFVVSVFAEAFFEKTNEQVVEVCRNSSSPHTHLFPNDNTTLAVDIYKGGVVLGCYFGPAT…
XP_014702873.1	MGRLLVKGRAGGRVLACGLVLGFFVQLAGPGHVGRALMAHESYSKNSGTQVSTMVLGPEQKMPDDDASGDHGDSASLGAINSAYSNSSLPQSTGHSEEPFTTYFDEKIAIPEEEYSCFSFRKLWAFTGPGFLMSIAYLDPGNIESDLQSGAVAGFKLLWILLLATIVGLLLQRLAARLGVVTGLHLAEVCHRQYPRVPRIILWLMVELAIIGSDMQEVIGSAIAINLLSMGRVPLWGGVLITIADTFVFLFLDKYGLRKLEAFFGFLITVMALTFGYEYITVRPSQSQVLKGMFVPGCSGCRTPQIEQAVGIVGAVIMPHNMYLHSALVKSRQINRANKREIREANKYFFIESCIALFVSFIINVFVVSVFAEAFFEKTNEQVVEVCRNSSSPHTHLFP…
XP_014702875.1	MNPYDLPFLKESYSKNSGTQVSTMVLGPEQKMPDDDASGDHGDSASLGAINSAYSNSSLPQSTGHSEEPFTTYFDEKIAIPEEEYSCFSFRKLWAFTGPGFLMSIAYLDPGNIESDLQSGAVAGFKLLWILLLATIVGLLLQRLAARLGVVTGLHLAEVCHRQYPRVPRIILWLMVELAIIGSDMQEVIGSAIAINLLSMGRVPLWGGVLITIADTFVFLFLDKYGLRKLEAFFGFLITVMALTFGYEYITVRPSQSQVLKGMFVPGCSGCRTPQIEQAVGIVGAVIMPHNMYLHSALVKSRQINRANKREIREANKYFFIESCIALFVSFIINVFVVSVFAEAFFEKTNEQVVEVCRNSSSPHTHLFPNDNTTLAVDIYKGGVVLGCYFGPATLYIWA…
XP_005611235.2	MNPYDLPFLKESYSKNSGTQVSTMVLGPEQKMPDDDASGDHGDSASLGAINSAYSNSSLPQSTGHSEEPFTTYFDEKIAIPEEEYSCFSFRKLWAFTGPGFLMSIAYLDPGNIESDLQSGAVAGFKLLWILLLATIVGLLLQRLAARLGVVTGLHLAEVCHRQYPRVPRIILWLMVELAIIGSDMQEVIGSAIAINLLSMGRVPLWGGVLITIADTFVFLFLDKYGLRKLEAFFGFLITVMALTFGYEYITVRPSQSQVLKGMFVPGCSGCRTPQIEQAVGIVGAVIMPHNMYLHSALVKSRQINRANKREIREANKYFFIESCIALFVSFIINVFVVSVFAEAFFEKTNEQVVEVCRNSSSPHTHLFPNDNTTLAVDIYKGGVVLGCYFGPATLYIWA…
XP_005611236.2	MAHESYSKNSGTQVSTMVLGPEQKMPDDDASGDHGDSASLGAINSAYSNSSLPQSTGHSEEPFTTYFDEKIAIPEEEYSCFSFRKLWAFTGPGFLMSIAYLDPGNIESDLQSGAVAGFKLLWILLLATIVGLLLQRLAARLGVVTGLHLAEVCHRQYPRVPRIILWLMVELAIIGSDMQEVIGSAIAINLLSMGRVPLWGGVLITIADTFVFLFLDKYGLRKLEAFFGFLITVMALTFGYEYITVRPSQSQVLKGMFVPGCSGCRTPQIEQAVGIVGAVIMPHNMYLHSALVKSRQINRANKREIREANKYFFIESCIALFVSFIINVFVVSVFAEAFFEKTNEQVVEVCRNSSSPHTHLFPNDNTTLAVDIYKGGVVLGCYFGPATLYIWAVGILAAG…
XP_014702877.1	MVLGPEQKMPDDDASGDHGDSASLGAINSAYSNSSLPQSTGHSEEPFTTYFDEKIAIPEEEYSCFSFRKLWAFTGPGFLMSIAYLDPGNIESDLQSGAVAGFKLLWILLLATIVGLLLQRLAARLGVVTGLHLAEVCHRQYPRVPRIILWLMVELAIIGSDMQEVIGSAIAINLLSMGRVPLWGGVLITIADTFVFLFLDKYGLRKLEAFFGFLITVMALTFGYEYITVRPSQSQVLKGMFVPGCSGCRTPQIEQAVGIVGAVIMPHNMYLHSALVKSRQINRANKREIREANKYFFIESCIALFVSFIINVFVVSVFAEAFFEKTNEQVVEVCRNSSSPHTHLFPNDNTTLAVDIYKGGVVLGCYFGPATLYIWAVGILAAGQSSTMTGTYSGQFVME…
XP_005611232.2	MVLGPEQKMPDDDASGDHGDSASLGAINSAYSNSSLPQSTGHSEEPFTTYFDEKIAIPEEEYSCFSFRKLWAFTGPGFLMSIAYLDPGNIESDLQSGAVAGFKLLWILLLATIVGLLLQRLAARLGVVTGLHLAEVCHRQYPRVPRIILWLMVELAIIGSDMQEVIGSAIAINLLSMGRVPLWGGVLITIADTFVFLFLDKYGLRKLEAFFGFLITVMALTFGYEYITVRPSQSQVLKGMFVPGCSGCRTPQIEQAVGIVGAVIMPHNMYLHSALVKSRQINRANKREIREANKYFFIESCIALFVSFIINVFVVSVFAEAFFEKTNEQVVEVCRNSSSPHTHLFPNDNTTLAVDIYKGGVVLGCYFGPATLYIWAVGILAAGQSSTMTGTYSGQFVME…
XP_023499320.1	MSKDNSLNDASGDHGDSASLGAINSAYSNSSLPQSTGHSEEPFTTYFDEKIAIPEEEYSCFSFRKLWAFTGPGFLMSIAYLDPGNIESDLQSGAVAGFKLLWILLLATIVGLLLQRLAARLGVVTGLHLAEVCHRQYPRVPRIILWLMVELAIIGSDMQEVIGSAIAINLLSMGRVPLWGGVLITIADTFVFLFLDKYGLRKLEAFFGFLITVMALTFGYEYITVRPSQSQVLKGMFVPGCSGCRTPQIEQAVGIVGAVIMPHNMYLHSALVKSRQINRANKREIREANKYFFIESCIALFVSFIINVFVVSVFAEAFFEKTNEQVVEVCRNSSSPHTHLFPNDNTTLAVDIYKGGVVLGCYFGPATLYIWAVGILAAGQSSTMTGTYSGQFVMEGFLN…
XP_008510603.1	MGRLLVKGRAGGRVLACGLVLRFFVQLAGPGHVGRAVMAHESYSKNSGTQVSTMVLGPEQKMPDDDASGDHGDSASLGAINSAYSNSSLPQSTGHSEEPFTTYFDEKIAIPEEEYSCFSFRKLWAFTGPGFLMSIAYLDPGNIESDLQSGAVAGFKLLWILLLATIVGLLLQRLAARLGVVTGLHLAEVCHRQYPRVPRIILWLMVELAIIGSDMQEVIGSAIAINLLSMGRVPLWGGVLITIADTFVFLFLDKYGLRKLEAFFGFLITVMALTFGYEYITVRPSQSQVLKGMFVPGCSGCRTPQIEQAVGIVGAVIMPHNMYLHSALVKSRQINRANKREIREANKYFFIESCIALFVSFIINVFVVSVFAEAFFEKTNEQVVEVCRNSSSPHTHLFP…
XP_014702876.1	MGRLLVKGRAGGRVLACGLVLGFFVQLAGPGHVGRALMAHESYSKNSGTQVSTMVLGPEQKMPDDDASGDHGDSASLGAINSAYSNSSLPQSTGHSEEPFTTYFDEKIAIPEEEYSCFSFRKLWAFTGPGFLMSIAYLDPGNIESDLQSGAVAGFKLLWILLLATIVGLLLQRLAARLGVVTGLHLAEVCHRQYPRVPRIILWLMVELAIIGSDMQEVIGSAIAINLLSMGRVPLWGGVLITIADTFVFLFLDKYGLRKLEAFFGFLITVMALTFGYEYITVRPSQSQVLKGMFVPGCSGCRTPQIEQAVGIVGAVIMPHNMYLHSALVKSRQINRANKREIREANKYFFIESCIALFVSFIINVFVVSVFAEAFFEKTNEQVVEVCRNSSSPHTHLFP…
XP_023499318.1	MAHESYSKNSGTQVSTMVLGPEQKMPDDDASGDHGDSASLGAINSAYSNSSLPQSTGHSEEPFTTYFDEKIAIPEEEYSCFSFRKLWAFTGPGFLMSIAYLDPGNIESDLQSGAVAGFKLLWILLLATIVGLLLQRLAARLGVVTGLHLAEVCHRQYPRVPRIILWLMVELAIIGSDMQEVIGSAIAINLLSMGRVPLWGGVLITIADTFVFLFLDKYGLRKLEAFFGFLITVMALTFGYEYITVRPSQSQVLKGMFVPGCSGCRTPQIEQAVGIVGAVIMPHNMYLHSALVKSRQINRANKREIREANKYFFIESCIALFVSFIINVFVVSVFAEAFFEKTNEQVVEVCRNSSSPHTHLFPNDNTTLAVDIYKGGVVLGCYFGPATLYIWAVGILAAG…
XP_008510606.1	MKKQLKTEAAPHCELKSYSKNSGTQVSTMVLGPEQKMPDDDASGDHGDSASLGAINSAYSNSSLPQSTGHSEEPFTTYFDEKIAIPEEEYSCFSFRKLWAFTGPGFLMSIAYLDPGNIESDLQSGAVAGFKLLWILLLATIVGLLLQRLAARLGVVTGLHLAEVCHRQYPRVPRIILWLMVELAIIGSDMQEVIGSAIAINLLSMGRVPLWGGVLITIADTFVFLFLDKYGLRKLEAFFGFLITVMALTFGYEYITVRPSQSQVLKGMFVPGCSGCRTPQIEQAVGIVGAVIMPHNMYLHSALVKSRQINRANKREIREANKYFFIESCIALFVSFIINVFVVSVFAEAFFEKTNEQVVEVCRNSSSPHTHLFPNDNTTLAVDIYKGGVVLGCYFGPAT…
XP_008510611.1	MNPYDLPFLKESYSKNSGTQVSTMVLGPEQKMPDDDASGDHGDSASLGAINSAYSNSSLPQSTGHSEEPFTTYFDEKIAIPEEEYSCFSFRKLWAFTGPGFLMSIAYLDPGNIESDLQSGAVAGFKLLWILLLATIVGLLLQRLAARLGVVTGLHLAEVCHRQYPRVPRIILWLMVELAIIGSDMQEVIGSAIAINLLSMGRVPLWGGVLITIADTFVFLFLDKYGLRKLEAFFGFLITVMALTFGYEYITVRPSQSQVLKGMFVPGCSGCRTPQIEQAVGIVGAVIMPHNMYLHSALVKSRQINRANKREIREANKYFFIESCIALFVSFIINVFVVSVFAEAFFEKTNEQVVEVCRNSSSPHTHLFPNDNTTLAVDIYKGGVVLGCYFGPATLYIWA…
XP_008510624.1	MVLGPEQKMPDDDASGDHGDSASLGAINSAYSNSSLPQSTGHSEEPFTTYFDEKIAIPEEEYSCFSFRKLWAFTGPGFLMSIAYLDPGNIESDLQSGAVAGFKLLWILLLATIVGLLLQRLAARLGVVTGLHLAEVCHRQYPRVPRIILWLMVELAIIGSDMQEVIGSAIAINLLSMGRVPLWGGVLITIADTFVFLFLDKYGLRKLEAFFGFLITVMALTFGYEYITVRPSQSQVLKGMFVPGCSGCRTPQIEQAVGIVGAVIMPHNMYLHSALVKSRQINRANKREIREANKYFFIESCIALFVSFIINVFVVSVFAEAFFEKTNEQVVEVCRNSSSPHTHLFPNDNTTLAVDIYKGGVVLGCYFGPATLYIWAVGILAAGQSSTMTGTYSGQFVME…
XP_004429079.2	MKKQVKTEAAPQCELKSSSEHSGTQVSTMVLGPEQKMPDDDASGDHGDFASLGAINSAYSNSSLPQSTGQSEEPFTTYFDEKIAIPEEEHSCFSFRKLWAFTGPGFLMSIAYLDPGNIESDLQSGAVAGFKLLWVLLLATIVGLLLQRLAARLGVVTGLHLAEVCHRQYPRVPRIILWLMVELAIIGSDMQEVIGSSIAINLLSMGRIPLWGGVLITIADTFVFLFLDKYGLRKLEAFFGFLITIMALTFGYEYITVQPSQSQVLRGMFVPGCSGCRTPQVEQAVGIVGAVIMPHNMYLHSALVKSRQVNRASKREVREANKYFFIESCIALFVSFVINVFVVSVFAEAFFEKTNEQVLQVCSNSSSPHAHLFPDNNATLAVDIYKGGIVLGCYFGPAT…
XP_004429080.1	MVLGPEQKMPDDDASGDHGDFASLGAINSAYSNSSLPQSTGQSEEPFTTYFDEKIAIPEEEHSCFSFRKLWAFTGPGFLMSIAYLDPGNIESDLQSGAVAGFKLLWVLLLATIVGLLLQRLAARLGVVTGLHLAEVCHRQYPRVPRIILWLMVELAIIGSDMQEVIGSSIAINLLSMGRIPLWGGVLITIADTFVFLFLDKYGLRKLEAFFGFLITIMALTFGYEYITVQPSQSQVLRGMFVPGCSGCRTPQVEQAVGIVGAVIMPHNMYLHSALVKSRQVNRASKREVREANKYFFIESCIALFVSFVINVFVVSVFAEAFFEKTNEQVLQVCSNSSSPHAHLFPDNNATLAVDIYKGGIVLGCYFGPATLYIWAVGILAAGQSSTMTGTYSGQFVME…
XP_014641944.1	MVLGPEQKMPDDDASGDHGDFASLGAINSAYSNSSLPQSTGQSEEPFTTYFDEKIAIPEEEHSCFSFRKLWAFTGPGFLMSIAYLDPGNIESDLQSGAVAGFKLLWVLLLATIVGLLLQRLAARLGVVTGLHLAEVCHRQYPRVPRIILWLMVELAIIGSDMQEVIGSSIAINLLSMGRIPLWGGVLITIADTFVFLFLDKYGLRKLEAFFGFLITIMALTFGYEYITVQPSQSQVLRGMFVPGCSGCRTPQVEQAVGIVGAVIMPHNMYLHSALVKSRQVNRASKREVREANKYFFIESCIALFVSFVINVFVVSVFAEAFFEKTNEQVLQVCSNSSSPHAHLFPDNNATLAVDIYKGGIVLGCYFGPATLYIWAVGILAAGQSSTMTGTYSGQFVME…
XP_002711152.2	MRKKQSKAEAAPGCELKSYSKNSGTQLSTMVLGPEQNMPDDNASGDHGDAASLGVINSAYSHSSLPQSTGHAGEPFATYFDEKIPIPEEQHSCFSFRKLWAFTGPGFLMSIAYLDPGNIESDLQSGAVAGFPLLWVLLLATIVGLLLQRLAARLGVVTGLHLAEVCHRHYPKVPRIILWLMVELAIIGSDMQEVIGSAIAINLLSIGRVPLWGGVLITIADTFVFLFLDKYGLRKLEAFFGFLITLMALTFGYEYVTVRPSQSQVLRGMFVPSCSGCRTPQIEQAVGIVGAVIMPHNMYLHSALVKSRQVNRANKQEVREANKYFFVESCIALFVSFIINVFVVSVFAEAFFEKTNQQVVDVCRNSSSPYTGLFPEDNSTLAVDIYKGGVVLGCYFGPA…
XP_006242371.1	MGKKQPRAAASAAPNCELKSYSKSTDPQVSTMVLDPEEKIPDDGASGDHGDSASLGAINPAYSNSSLPHSTGDSEEPFTTYFDEKIPIPEEEYSCFSFRKLWAFTGPGFLMSIAYLDPGNIESDLQSGAVAGFKLLWVLLLATIVGLLLQRLAARLGVVTGLHLAEVCHRQYPKVPRIILWLMVELAIIGSDMQEVIGSAIAINLLSAGRVPLYGGVLITIADTFVFLFLDKYGLRKLEAFFGFLITIMALTFGYEYVTVKPSQSQVLRGMFVPSCSGCHTPQVEQAVGIVGAVIMPHNMYLHSALVKSRQVNRANKQEVREANKYFFIESCIALFVSFIINVFVVSVFAEAFFEKTNEQVVEVCRNSSSPHADLFPNDNSTLAVDIYKGGVVLGCYFG…
NP_037305.2	MGKKQPRAAASAAPNCELKSYSKSTDPQVSTMVLDPEEKIPDDGASGDHGDSASLGAINPAYSNSSLPHSTGDSEEPFTTYFDEKIPIPEEEYSCFSFRKLWAFTGPGFLMSIAYLDPGNIESDLQSGAVAGFKLLWVLLLATIVGLLLQRLAARLGVVTGLHLAEVCHRQYPKVPRIILWLMVELAIIGSDMQEVIGSAIAINLLSAGRVPLYGGVLITIADTFVFLFLDKYGLRKLEAFFGFLITIMALTFGYEYVTVKPSQSQVLRGMFVPSCSGCHTPQVEQAVGIVGAVIMPHNMYLHSALVKSRQVNRANKQEVREANKYFFIESCIALFVSFIINVFVVSVFAEAFFEKTNEQVVEVCRNSSSPHADLFPNDNSTLAVDIYKGGVVLGCYFG…
XP_011243789.1	MGKKQPRAAAAAPNCELKSYSKSTDPQVSTMVLDPKEKMPDDGASGDHGDSASLGAINPAYSNSSLPHSTGDSEEPFTTYFDEKIPIPEEEYSCFSFRKLWAFTGPGFLMSIAYLDPGNIESDLQSGAVAGFKLLWVLLLATIVGLLLQRLAARLGVVTGLHLAEVCHRQYPKVPRIILWLMVELAIIGSDMQEVIGSAIAINLLSAGRVPLWGGVLITIADTFVFLFLDKYGLRKLEAFFGFLITIMALTFGYEYITVKPSQSQVLRGMFVPSCPGCRTPQVEQAVGIVGAVIMPHNMYLHSALVKSRQVNRANKQEVREANKYFFIESCIALFVSFIINVFVVSVFAEAFFEKTNKQVVEVCKNNSSPHADLFPSDNSTLAVDIYKGGVVLGCYFGP…
NP_032758.2	MVLDPKEKMPDDGASGDHGDSASLGAINPAYSNSSLPHSTGDSEEPFTTYFDEKIPIPEEEYSCFSFRKLWAFTGPGFLMSIAYLDPGNIESDLQSGAVAGFKLLWVLLLATIVGLLLQRLAARLGVVTGLHLAEVCHRQYPKVPRIILWLMVELAIIGSDMQEVIGSAIAINLLSAGRVPLWGGVLITIADTFVFLFLDKYGLRKLEAFFGFLITIMALTFGYEYITVKPSQSQVLRGMFVPSCPGCRTPQVEQAVGIVGAVIMPHNMYLHSALVKSRQVNRANKQEVREANKYFFIESCIALFVSFIINVFVVSVFAEAFFEKTNKQVVEVCKNNSSPHADLFPSDNSTLAVDIYKGGVVLGCYFGPAALYIWAVGILAAGQSSTMTGTYSGQFVME…
XP_006242373.1	MVLDPEEKIPDDGASGDHGDSASLGAINPAYSNSSLPHSTGDSEEPFTTYFDEKIPIPEEEYSCFSFRKLWAFTGPGFLMSIAYLDPGNIESDLQSGAVAGFKLLWVLLLATIVGLLLQRLAARLGVVTGLHLAEVCHRQYPKVPRIILWLMVELAIIGSDMQEVIGSAIAINLLSAGRVPLYGGVLITIADTFVFLFLDKYGLRKLEAFFGFLITIMALTFGYEYVTVKPSQSQVLRGMFVPSCSGCHTPQVEQAVGIVGAVIMPHNMYLHSALVKSRQVNRANKQEVREANKYFFIESCIALFVSFIINVFVVSVFAEAFFEKTNEQVVEVCRNSSSPHADLFPNDNSTLAVDIYKGGVVLGCYFGPAALYIWAVGILAAGQSSTMTGTYSGQFVME…
XP_029325635.1	MGKKQPRAAAAAPDCELKSYSKSTDPQVSTMVLDPEEKMPDDGASGDHGDSASLGAINPAYSSSSLPHSTGDSEEPFTTYFDEKIPIPEEEYSCFSFRKLWAFTGPGFLMSIAYLDPGNIESDLQSGAVAGFKLLWVLLLATIVGLLLQRLAARLGVVTGLHLAEVCHRQYPKVPRIILWLMVELAIIGSDMQEVIGSAIAINLLSAGRVPLWGGVLITIADTFVFLFLDKYGLRKLEAFFGFLITIMALTFGYEYITVKPSQSQVLRGMFVPSCPGCRTPQVEQAVGIVGAVIMPHNMYLHSALVKSRQVNRANKQEVREANKYFFIESCIALFVSFIINVFVVSVFAEAFFEKTNEQVVEVCKNNSSPHADLFPSDNSTLAVDIYKGGVVLGCYFGP…
AAC42051.1	MVLDPKEKMPDDGASGDHGDSASLGAINPAYSNSSLPHSTGDSEEPFTTYFDEKIPIPEEEYSCFSFRKLWAFTGPGFLMSIAYLDPGNIESDLQSGAVAGFKLLWVLLLATIVGLLLQRLAARLGVVTGLHLAEVCHRQYPKVPRIILWLMVELAIIGSDMQEVIGSAIAINLLSAGRVPVWGGVLITIADTFVFLFLDKYGLRKLEAFFGFLITIMALTFGYEYITVKPSQSQVLRGMFVPSCPGCRTPQVEQAVGIVGAVIMPHNMYLHSALVKSRQVNRANKQEVREANKYFFIESCIALFVSFIINVFVVSVFAEAFFEKTNKQVVEVCKNNSSPHADLFPSDNSTLAVDIYKGGVVLGCYFGPAALYIWAVGILAAGQSSTMTGTYSGQFVME…
O54902.1	MVLDPEEKIPDDGASGDHGDSASLGAINPAYSNSSLPHSTGDSEEPFTTYFDEKIPIPEEEYSCFSFRKLWAFTGPGFLMSIAYLDPGNIESDLQSGAVAGFKLLWVLLLATIVGLLLQRLAARLGVVTGLHLAEVCHRQYPKVPRIILWLMVELAIIGSDMQEVIGSAIAINLLSAGRVPLYGGVLITIADTFVFLFLDKYGLRKLEAFFGFLITIMALTFGYEYVTVKPSQSQVLRGMFVPSCSGCHTPQVEQAVGIVGAVIMPHNMYLHSALVKSRQVNRANKQEVREANKYFFIESCIALFVSFIINVFVVSVFAEAFFEKTNEQVVEVCRNSSSPHADLFPNDNSTLAVDIYKGGVVLGCYFGPAALYIWAVGILAAGQSSTMTGTYSGQFVME…
EDL04089.1	WSRRRGVCGGGGAESYSKSTDPQVSTMVLDPKEKMPDDGASGDHGDSASLGAINPAYSNSSLPHSTGDSEEPFTTYFDEKIPIPEEEYSCFSFRKLWAFTGPGFLMSIAYLDPGNIESDLQSGAVAGFKLLWVLLLATIVGLLLQRLAARLGVVTGLHLAEVCHRQYPKVPRIILWLMVELAIIGSDMQEVIGSAIAINLLSAGRVPLWGGVLITIADTFVFLFLDKYGLRKLEAFFGFLITIMALTFGYEYITVKPSQSQVLRGMFVPSCPGCRTPQVEQAVGIVGAVIMPHNMYLHSALVKSRQVNRANKQEVREANKYFFIESCIALFVSFIINVFVVSVFAEAFFEKTNKQVVEVCKNNSSPHADLFPSDNSTLAVDIYKGGVVLGCYFGPAALY…
NP_001139633.1	MVLDPKEKMPDDGASGDHGDSASLGAINPAYSNSSLPHSTGDSEEPFTTYFDEKIPIPEEEYSCFSFRKLWAFTGPGFLMSIAYLDPGNIESDLQSGAVAGFKLLWVLLLATIVGLLLQRLAARLGVVTGLHLAEVCHRQYPKVPRIILWLMVELAIIGSDMQEVIGSAIAINLLSAGRVPLWGGVLITIADTFVFLFLDKYGLRKLEAFFGFLITIMALTFGYEYITVKPSQSQVLRGMFVPSCPGCRTPQVEQAVGIVGAVIMPHNMYLHSALVKSRQVNRANKQEVREANKYFFIESCIALFVSFIINVFVVSVFAEAFFEKTNKQVVEVCKNNSSPHADLFPSDNSTLAVDIYKGGVVLGCYFGPAALYIWAVGILAAGQSSTMTGTYSGQFVME…
XP_027240926.1	MGKRQPRAAAAAPNCELKSYSKNTDTQVSTMVLDPEEKMPDDGASGDHGDSASLSTINPAYSISSLPQSTGDSEEPFTTYFDEKIPIPEEEYSCFSFRKLWAFTGPGFLMSIAYLDPGNIESDLQSGAVAGFKLLWVLLLATIVGLLLQRLAARLGVVTGLHLAEVCHRQYPKVPRIILWLMVELAIIGSDMQEVIGSAIAINLLSAGRVPLWGGVLITIADTFVFLFLDKYGLRKLEAFFGFLITIMALTFGYEYVTVKPSQSQVLRGMFVPSCSGCSTPQVEQAVGIVGAVIMPHNMYLHSALVKSRQVNRANKQEVREANKYFFIESCIALFVSFIINVFVVSVFAEAFFGKTNEQVVNVCRNSSSPHTDLFPNDNSTLAVDIYKGGVVLGCYFGP…
ERE82848.1	MGKRQPRAAAAAPNCELKSYSKNTDTQVSTMVLDPEEKMPDDGASGDHGDSASLSTINPAYSISSLPQSTGDSEEPFTTYFDEKIPIPEEEYSCFSFRKLWAFTGPGFLMSIAYLDPGNIESDLQSGAVAGFKLLWVLLLATIVGLLLQRLAARLGVVTGLHLAEVCHRQYPKVPRIILWLMVELAIIGSDMQEVIGSAIAINLLSAGRVPLWGGVLITIADTFVFLFLDKYGLRKLEAFFGFLITIMALTFGYEASYVTVKPSQSQVLRGMFVPSCSGCSTPQVEQAVGIVGAVIMPHNMYLHSALVKSRQVNRANKQEVREANKYFFIESCIALFVSFIINVFVVSVFAEAFFGKTNEQVVNVCRNSSSPHTDLFPNDNSTLAVDIYKGGVVLGCYF…
ERE82849.1	MGKRQPRAAAAAPNCELKSYSKNTDTQVSTMVLDPEEKMPDDGASGDHGDSASLSTINPAYSISSLPQSTGDSEEPFTTYFDEKIPIPEEEYSCFSFRKLWAFTGPGFLMSIAYLDPGNIESDLQSGAVAGFKLLWVLLLATIVGLLLQRLAARLGVVTGLHLAEVCHRQYPKVPRIILWLMVELAIIGSDMQEVIGSAIAINLLSAGRVPLWGGVLITIADTFVFLFLDKYGLRKLEAFFGFLITIMALTFGYEASYVTVKPSQSQVLRGMFVPSCSGCSTPQVEQAVGIVGAVIMPHNMYLHSALVKSRQVNRANKQEVREANKYFFIESCIALFVSFIINVFVVSVFAEAFFGKTNEQVVNVCRNSSSPHTDLFPNDNSTLAVDIYKGGVVLGCYF…
XP_003513591.1	MVLDPEEKMPDDGASGDHGDSASLSTINPAYSISSLPQSTGDSEEPFTTYFDEKIPIPEEEYSCFSFRKLWAFTGPGFLMSIAYLDPGNIESDLQSGAVAGFKLLWVLLLATIVGLLLQRLAARLGVVTGLHLAEVCHRQYPKVPRIILWLMVELAIIGSDMQEVIGSAIAINLLSAGRVPLWGGVLITIADTFVFLFLDKYGLRKLEAFFGFLITIMALTFGYEYVTVKPSQSQVLRGMFVPSCSGCSTPQVEQAVGIVGAVIMPHNMYLHSALVKSRQVNRANKQEVREANKYFFIESCIALFVSFIINVFVVSVFAEAFFGKTNEQVVNVCRNSSSPHTDLFPNDNSTLAVDIYKGGVVLGCYFGPATLYIWAVGILAAGQSSTMTGTYSGQFVME…
XP_021038594.1	MVLDPEEKMPDDGASGDHGDSASLGAINPAYSSSSLPHSTGDSEEPFTTYFDEKIPIPEEEYSCFSFRKLWAFTGPGFLMSIAYLDPGNIESDLQSGAVAGFKLLWVLLLATIVGLLLQRLAARLGVVTGLHLAEVCHRQYPKVPRIILWLMVELAIIGSDMQEVIGSAIAINLLSAGRVPLWGGVLITIADTFVFLFLDKYGLRKLEAFFGFLITIMALTFGYEYITVKPSQSQVLRGMFVPSCPGCRTPQVEQAVGIVGAVIMPHNMYLHSALVKSRQVNRANKQEVREANKYFFIESCIALFVSFIINVFVVSVFAEAFFEKTNEQVVEVCKNNSSPHADLFPSDNSTLAVDIYKGGVVLGCYFGPAALYIWAVGILAAGQSSTMTGTYSGQFVME…
AAC53319.1	MVLDPEEKIPDDGASGDHGDSASLGAINPAYSNSSLPHSTGDSEEPFTTYFDEKIPIPEEEYSCFSFRKLWAFTGPGFLMSIAYLDPGNIESDLQSGAVAGFKLLWVLLLATIVGLLLQRLAARLGVVTGLHLAEVCHRQYPKVPRIILWLMVELAIIGSDMQEVIGSAIAINLLSAGRVPLYGGVLITIADTFVFLFLDKYGLRKLEAFFGFLITIMALTFGYEYVTVKPSQSQVLRGMFVPSCSGCHTPQVEQAVGIVGAVIMPHNMYLHSALVKSRQVNRANKQEVREANKYFFIESCIALFVSFIINVFVVSVFAEAFFEKTNEQVVEVCRNSSSPHADLFPNDNSTLAVDIYKGGVVLGCYFGPAALYIWAVGILAAGQSSTMTGTYSGQFVME…
BAE28454.1	MVLDPEEKMPDDGASGDHGDSASLGAINPAYSNSSLPHSTGDSEEPFTTYFDEKIPIPEEEYSCFSFRKLWAFTGPGFLMSIAYLDPGNIESDLQSGAVAGFKLLWVLLLATIVGLLLQRLAARLGVVTGLHLAEVCHRQYPKVPRIILWLMVELAIIGSDMQEVIGSAIAINLLSAGRVPLWGGVLITIADTFVFLFLDKYGLRKLEAFFGFLITIMALTFGYEYITVKPSQSQVLRGMFVPSCPGCRTPQVEQAVGIVGAVIMPHNMYLHSALVKSRQVNRANKQEVREANKYFFIESCIALFVSFIINVFVVSVFAEAFFEKTNKQVVEVCKNNSSPHADLFPSDNSTLAVDIYKGGVVLGCYFGPAALYIWAVGILAAGQSSTMTGTYSGQFVME…
AAC24496.1	MVLDPKEKMPDDGASGDHGDSASLGAINPAYSNSSLPHSTGDSEEPFTTYFDEKIPIPEEEYSCFSFSKLWAFTGPGFLMSIAYLDPGNIESDLQSGAVAGFKLLWVLLLATIVGLLLQRLAARLGVVTGLHLAEVCHRQYPKVPRIILWLMVELAIIGSDMQEVIGSAIAINLLSAGRVPLWGGVLITIADTFVFLFLDKYGLRKLEAFFGFLITIMALTFGYEYITVKPSQSQVLRGMFVPSCPGCRTPQVEQAVGIVGAVIMPHNMYLHSALVKSRQVNRANKQEVREANKYFFIESCIALFVSFIINVFVVSVFAEAFFEKTNKQVVEVCKNNSSPHADLFPSDNSTLAVDIYKGGVVLGCYFGPAALYIWAVGILAAGQSSTMTGTYSGQFVME…
BAC38930.1	MVLDPKEKMPDDGASGDHGDSASLGAINPAYSNSSLPHSTGDSEEPFTTYFDEKIPIPEEEYSCFSFRKLWAFTGPGFLMSIAYLDPGNIESDLQSGAVAGFKLLWVLLLATIVGLLLQRLAARLGVVTGLHLAEVCHRQYRKVPRIILWLMVELAIIGSDMQEVIGSAIAINLLSAGRVPLWGGVLITIADTFVFLFLDKYGLRKLEAFFGFLITIMALTFGYEYITVKPSQSQVLRGMFVPSCPGCRTPQVEQAVGIVGAVIMPHNMYLHSALVKSRQVNRANKQEVREANKYFFIESCIALFVSFIINVFVVSVFAEAFFEKTNKQVVEVCKNNSSPHADLFPSDNSTLAVDIYKGGVVLGCYFGPAALYIWAVGILAAGQSSTMTGTYSGQFVME…
XP_005067299.2	MVLDPEEKMPDDGASGDHRDSASLSTINPAYSNSSLPQSTGDSEEPFTTYFDEKIPIPEEEYSCFSFRKLWAFTGPGFLMSIAYLDPGNIESDLQSGAVAGFKLLWVLLLATIVGLLLQRLAARLGVVTGLHLAEVCHRQYPKVPRIILWLMVELAIIGSDMQEVIGSAIAINLLSAGRVPLWGGVLITIADTFVFLFLDKYGLRKLEAFFGFLITIMALTFGYEYVTVKPSQSQVLRGMFVPSCSGCSTPQIEQAVGIVGAVIMPHNMYLHSALVKSRQVNRANKQEVREANKYFFIESCIALFVSFIINVFVVSVFAEAFFGKTNEQVVNVCRNSSSPHTDLFPNDNSTLAVDIYKGGVVLGCYFGPATLYIWAVGILAAGQSSTMTGTYSGQFVME…
XP_021071896.1	MVLDPEEKMPDDGASGDHGDSASLGAINPAYSNSSLPHSTGDSEEPFATYFDEKIPIPEEEYSCFSFRKLWAFTGPGFLMSIAYLDPGNIESDLQSGAVAGFKLLWVLLLATIVGLLLQRLAARLGVVTGLHLAEVCHRQYPKVPRIILWLMVELAIIGSDMQEVIGSAIAINLLSAGRVPLWGGVLITIADTFVFLFLDKYGLRKLEAFFGFLITIMALTFGYEYITVKPSQSQVLRGMFVPSCPGCRTPQVEQAVGIVGAVIMPHNMYLHSALVKSRQVNRANKQEVREANKYFFIESCIALFVSFIINVFVVSVFAEAFFEKTNQQVVEVCKNNSSPHSDLFPNDNSTLAVDIYKGGVVLGCYFGPAALYIWAVGILAAGQSSTMTGTYSGQFVME…
EDL04088.1	MVLDPKEKMPDDGASGDHGDSASLGAINPAYSNSSLPHSTGDSEEPFTTYFDEKIPIPEEEYSCFSFRKLWAFTGPGFLMSIAYLDPGNIESDLQSGAVAGFKLLWVLLLATIVGLLLQRLAARLGVVTGLHLAEVCHRQYPKVPRIILWLMVELAIIGSDMQEVIGSAIAINLLSAGRVPLWGGVLITIADTFVFLFLDKYGLRKLEAFFGFLITIMALTFGYEAMKPSQSQVLRGMFVPSCPGCRTPQVEQAVGIVGAVIMPHNMYLHSALVKSRQVNRANKQEVREANKYFFIESCIALFVSFIINVFVVSVFAEAFFEKTNKQVVEVCKNNSSPHADLFPSDNSTLAVDIYKGGVVLGCYFGPAALYIWAVGILAAGQSSTMTGTYSGQFVMEGF…
XP_006981974.1	MGKRQPSAAAPAPNCELKSYSKNTDTQVSTMVLDPEEKTPDDGASGDHGDSASLSTINPAYSNSSLPQSTGDSEDPFTTYFDEKIPIPEEEYSCFSFRKLWAFTGPGFLMSIAYLDPGNIESDLQSGAVAGFKLLWVLLLATIVGLLLQRLAARLGVVTGLHLAEVCHRQYPKVPRIILWLMVELAIIGSDMQEVIGSAIAINLLSVGRVPLWGGVLITIADTFVFLFLDKYGLRKLEAFFGFLITIMALTFGYEYVTVKPSQSQVLRGMFVPSCSGCSTPQIEQAVGIVGAVIMPHNMYLHSALVKSRQVNRANKREVREANKYFFIESCIALFVSFIINVFVVSVFAEAFFGKTNEQVVNVCRNSSSPHTDLFPEDNSTLAVDIYKGGVVLGCYFGP…
XP_015855950.1	MGKRQPSAAAPAPNCELKSYSKNTDTQVSTMVLDPEEKTPDDGASGDHGDSASLSTINPAYSNSSLPQSTGDSEDPFTTYFDEKIPIPEEEYSCFSFRKLWAFTGPGFLMSIAYLDPGNIESDLQSGAVAGFKLLWVLLLATIVGLLLQRLAARLGVVTGLHLAEVCHRQYPKVPRIILWLMVELAIIGSDMQEVIGSAIAINLLSVGRVPLWGGVLITIADTFVFLFLDKYGLRKLEAFFGFLITIMALTFGYEYVTVKPSQSQVLRGMFVPSCSGCSTPQIEQAVGIVGAVIMPHNMYLHSALVKSRQVNRANKREVREANKYFFIESCIALFVSFIINVFVVSVFAEAFFGKTNEQVVNVCRNSSSPHTDLFPEDNSTLAVDIYKGGVVLGCYFGP…
XP_006981975.1	MVLDPEEKTPDDGASGDHGDSASLSTINPAYSNSSLPQSTGDSEDPFTTYFDEKIPIPEEEYSCFSFRKLWAFTGPGFLMSIAYLDPGNIESDLQSGAVAGFKLLWVLLLATIVGLLLQRLAARLGVVTGLHLAEVCHRQYPKVPRIILWLMVELAIIGSDMQEVIGSAIAINLLSVGRVPLWGGVLITIADTFVFLFLDKYGLRKLEAFFGFLITIMALTFGYEYVTVKPSQSQVLRGMFVPSCSGCSTPQIEQAVGIVGAVIMPHNMYLHSALVKSRQVNRANKREVREANKYFFIESCIALFVSFIINVFVVSVFAEAFFGKTNEQVVNVCRNSSSPHTDLFPEDNSTLAVDIYKGGVVLGCYFGPAALYIWAVGILAAGQSSTMTGTYSGQFVME…
XP_028730406.1	MVLDPEEKTPDDGASGDHGDSASLSTINPAYSNSSLPQSTGDSEDPFTTYFDEKIPIPEEEYSCFSFRKLWAFTGPGFLMSIAYLDPGNIESDLQSGAVAGFKLLWVLLLATIVGLLLQRLAARLGVVTGLHLAEVCHRQYPKVPRIILWLMVELAIIGSDMQEVIGSAIAINLLSAGRVPLWGGVLITIADTFVFLFLDKYGLRKLEAFFGFLITIMALTFGYEYVTVKPSQSQVLRGMFVPSCSGCSTPQIEQAVGIVGAVIMPHNMYLHSALVKSRQVNRANKREVREANKYFFIESCIALFVSFIINVFVVSVFAEAFFGKTNEQVVNVCRNSSSPHTDLFPEDNSTLAVDIYKGGVVLGCYFGPAALYIWAVGILAAGQSSTMTGTYSGQFVME…
XP_028638068.1	METLLFLVSQRCGLRQQKQTYGRRAESYSKSTDPQVSTMVLDPEEKMPDDGASGDHGDSASLGAINPAYSNSSLPHSTGDSDEPFTTYFDEKIPIPEEEYSCFSFRKLWAFTGPGFLMSIAYLDPGNIESDLQSGAVAGFKLLWVLLLATIVGLLLQRLAARLGVVTGLHLAEVCHRQYPKVPRIILWLMVELAIIGSDMQEVIGSAIAINLLSAGRVPLWGGVLITIADTFVFLFLDKYGLRKLEAFFGFLITIMALTFGYEYITVRPSQSQVLRGMFVPSCSGCSTPQVEQAVGIVGAVIMPHNMYLHSALVKSRQVNRANKQEVREANKYFFIESCIALFVSFIINVFVVSVFAEAFFEKTNEQVVDVCRNNSSPHAGLFPNDNSTLAVDIYKGGV…
XP_028638069.1	MVLDPEEKMPDDGASGDHGDSASLGAINPAYSNSSLPHSTGDSDEPFTTYFDEKIPIPEEEYSCFSFRKLWAFTGPGFLMSIAYLDPGNIESDLQSGAVAGFKLLWVLLLATIVGLLLQRLAARLGVVTGLHLAEVCHRQYPKVPRIILWLMVELAIIGSDMQEVIGSAIAINLLSAGRVPLWGGVLITIADTFVFLFLDKYGLRKLEAFFGFLITIMALTFGYEYITVRPSQSQVLRGMFVPSCSGCSTPQVEQAVGIVGAVIMPHNMYLHSALVKSRQVNRANKQEVREANKYFFIESCIALFVSFIINVFVVSVFAEAFFEKTNEQVVDVCRNNSSPHAGLFPNDNSTLAVDIYKGGVVLGCYFGPAALYIWAVGILAAGQSSTMTGTYSGQFVME…
XP_021513682.1	MGKKQPRPAAAPNCELKSYSKNTDTRVSAMVLDPEEKTPDDGASGDHADSGSLGAINPAYSNSSLPLSTGDSEEPFTTYFDEKIPIPEEEYSCFSFRKLWAFTGPGFLMSIAYLDPGNIESDLQSGAVAGFKLLWVLLLATVVGLLLQRLAARLGVVTGLHLAEVCHRQYPKVPRIILWLMVELAIIGSDMQEVIGSAIAINLLSAGRVPLWGGVLITIADTFVFLFLDKYGLRKLEAFFGFLITIMALTFGYEYVTVKPSQSQVLRGMFVPSCSGCHTPQVEQAVGIVGAVIMPHNMYLHSALVKSRQVNRANKREVREANKYFFIESCIALFVSFIINVFVVSVFAEAFFGKTNDQVVDVCRNSSSPHTNLFPDDNSTLAVDIYKGGVVLGCYFGPA…
XP_021513683.1	MVLDPEEKTPDDGASGDHADSGSLGAINPAYSNSSLPLSTGDSEEPFTTYFDEKIPIPEEEYSCFSFRKLWAFTGPGFLMSIAYLDPGNIESDLQSGAVAGFKLLWVLLLATVVGLLLQRLAARLGVVTGLHLAEVCHRQYPKVPRIILWLMVELAIIGSDMQEVIGSAIAINLLSAGRVPLWGGVLITIADTFVFLFLDKYGLRKLEAFFGFLITIMALTFGYEYVTVKPSQSQVLRGMFVPSCSGCHTPQVEQAVGIVGAVIMPHNMYLHSALVKSRQVNRANKREVREANKYFFIESCIALFVSFIINVFVVSVFAEAFFGKTNDQVVDVCRNSSSPHTNLFPDDNSTLAVDIYKGGVVLGCYFGPAALYIWAVGILAAGQSSTMTGTYSGQFVME…
OBS79502.1	MGKRQPKAAAAAPNCELKSYSKNTDTQVSTMVLDPEEKTPDDGASGDHGDSASLSTINPAYSNSSLPQSTGDSEEPFTTYFDEKIPIPEEEYSCFSFRKLWAFTGPGFLMSIAYLDPGNIESDLQSGAVAGFKLLWVLLLATIVGLLLQRLAARLGVVTGLHLAEVCHRQYPKVPRIILWLMVELAIIGSDMQEVIGSAIAINLLSAGRVPLWGGVLITIADTFVFLFLDKYGLRKLEAFFGFLITIMAFTFGYEASYVTVKPSQSQVLRGMFVPSCSGCSTPQIEQAVGIVGAVIMPHNMYLHSALVKSRQVNRANKREIREANKYFFIESCIALFVSFIINVFVVSVFAEAFFDKTNEQVVNVCTNSSSPHTNLFPNDNSTLAVDIYKGGVVLGCYF…
XP_013204166.1	MVLDPEKKMPDDGASGDHGDSASLSAINPAYSNSSLPQSTGDSEEPFTTYFDEKIPIPEEEYSCFSFRKLWAFTGPGFLMSIAYLDPGNIESDLQSGAVAGFKLLWVLLLATIVGLLLQRLAARLGVVTGLHLAEVCHRQYPKVPRVILWLMVELAIIGSDMQEVIGSAIAINLLSAGRVPLWGGVLITIADTFVFLFLDKYGLRKLEAFFGFLITIMALTFGYEYITVKPSQSQVLRGMFVPSCSGCSTPQIEQAVGIVGAVIMPHNMYLHSALVKSRQVNRANKREVREANKYFFIESCIALFVSFIINVFVVSVFAEAFFGKTNMQVVDVCRNSSSPHTGLFPNDNSTLAVDIYKGGVVLGCYFGPAALYIWAVGILAAGQSSTMTGTYSGQFVME…
XP_008827120.1	MEALARHVSWRRESYSEKADTPVSAMVLGPEEKMPDDGASGDHRDSASLGAINPAYSNSSLPQSTGNSEEPFTTYFDEKIPIPDEEYSCFSFRKLWAFTGPGFLMSIAYLDPGNIESDLQSGAVAGFKLLWVLLLATIVGLLLQRLAARLGVVTGLHLAEVCHRQYPKVPRIILWLMVEVAIIGSDMQEVIGSAIAINLLSAGRVPLWGGVLITIADTFVFLFLDKYGLRKLEAFFGFLITIMALTFGYEYVTVKPNQSQVLKGMFVPSCSGCRTPQVEQAVGIVGAVIMPHNMYLHSALVKSRQVNRASKQEVREANKYFFIESCIALFVSFIINVFVVSVFAEAFFGKTNEQVIEVCRNSSSPHTGLFPNDNSTLAVDIYKGGVVLGCYFGPAALYI…
XP_008827121.1	MSAGGEVESYSEKADTPVSAMVLGPEEKMPDDGASGDHRDSASLGAINPAYSNSSLPQSTGNSEEPFTTYFDEKIPIPDEEYSCFSFRKLWAFTGPGFLMSIAYLDPGNIESDLQSGAVAGFKLLWVLLLATIVGLLLQRLAARLGVVTGLHLAEVCHRQYPKVPRIILWLMVEVAIIGSDMQEVIGSAIAINLLSAGRVPLWGGVLITIADTFVFLFLDKYGLRKLEAFFGFLITIMALTFGYEYVTVKPNQSQVLKGMFVPSCSGCRTPQVEQAVGIVGAVIMPHNMYLHSALVKSRQVNRASKQEVREANKYFFIESCIALFVSFIINVFVVSVFAEAFFGKTNEQVIEVCRNSSSPHTGLFPNDNSTLAVDIYKGGVVLGCYFGPAALYIWAVGI…
XP_029417373.1	MEALARHVSWRRESYSEKADTPVSAMVLGPEEKMPDDGASGDHRDSASLGAINPAYSNSSLPQSTGNSEEPFTTYFDEKIPIPDEEYSCFSFRKLWAFTGPGFLMSIAYLDPGNIESDLQSGAVAGFKLLWVLLLATIVGLLLQRLAARLGVVTGLHLAEVCHRQYPKVPRIILWLMVEVAIIGSDMQEVIGSAIAINLLSAGRVPLWGGVLITIADTFVFLFLDKYGLRKLEAFFGFLITIMALTFGYEYVTVKPNQSQVLKGMFVPSCSGCRTPQVEQAVGIVGAVIMPHNMYLHSALVKSRQVNRASKQEVREANKYFFIESCIALFVSFIINVFVVSVFAEAFFGKTNEQVIEVCRNSSSPHTGLFPNDNSTLAVDIYKGGVVLGCYFGPAALYI…
XP_023578543.1	MSAVKDSQKSYSKNVGPQISTMVLGPGQKMSDENVSEDHGDSASLDTISPACSNSSLPQSTGHSEEPFATYFDEKIAIPEEEYSCFSFRKLWAFTGPGFLMSIAYLDPGNIESDLQSGAVAGFKLLWVLLLATVVGLLLQRLAARLGVVTGLHLAEVCHRQYPKVPRIILWLMVELAIIGSDMQEVIGSAIAINLLSIGRVPLWGGVLITIADTFVFLFLDKYGLRKLEAFFGFLITVMALTFGYEYVTVKPNQSQVLRGMFVPSCSGCRTPQVEQAVGIVGAVIMPHNMYLHSALVKSRQVNRANKQEVREANKYFFIESCIALFVSFIINVFVVSVFAEAFFEKTNQQVVDVCKNSSSPYVGLFPENNSTLAVDIYKGGVVLGCYFGPAALYIWAVG…
XP_004637871.1	MKKKQHNTEAAPHCELKSYSKNVGPQISTMVLGPGQKMSDENVSEDHGDSASLDTISPACSNSSLPQSTGHSEEPFATYFDEKIAIPEEEYSCFSFRKLWAFTGPGFLMSIAYLDPGNIESDLQSGAVAGFKLLWVLLLATVVGLLLQRLAARLGVVTGLHLAEVCHRQYPKVPRIILWLMVELAIIGSDMQEVIGSAIAINLLSIGRVPLWGGVLITIADTFVFLFLDKYGLRKLEAFFGFLITVMALTFGYEYVTVKPNQSQVLRGMFVPSCSGCRTPQVEQAVGIVGAVIMPHNMYLHSALVKSRQVNRANKQEVREANKYFFIESCIALFVSFIINVFVVSVFAEAFFEKTNQQVVDVCKNSSSPYVGLFPENNSTLAVDIYKGGVVLGCYFGPA…
XP_023578544.1	MVLGPGQKMSDENVSEDHGDSASLDTISPACSNSSLPQSTGHSEEPFATYFDEKIAIPEEEYSCFSFRKLWAFTGPGFLMSIAYLDPGNIESDLQSGAVAGFKLLWVLLLATVVGLLLQRLAARLGVVTGLHLAEVCHRQYPKVPRIILWLMVELAIIGSDMQEVIGSAIAINLLSIGRVPLWGGVLITIADTFVFLFLDKYGLRKLEAFFGFLITVMALTFGYEYVTVKPNQSQVLRGMFVPSCSGCRTPQVEQAVGIVGAVIMPHNMYLHSALVKSRQVNRANKQEVREANKYFFIESCIALFVSFIINVFVVSVFAEAFFEKTNQQVVDVCKNSSSPYVGLFPENNSTLAVDIYKGGVVLGCYFGPAALYIWAVGILAAGQSSTMTGTYSGQFVME…
XP_013014635.1	MKKKQSNTEAAPHCELKSYSKKEGPPVSTMVLGPEQKMSNENSSGDHGDSASLDAISSTCSNSSFPQSTGQAEEPFATYFDEKIAIPEEEYSCFSFRKLWAFTGPGFLMSIAYLDPGNIESDLQSGAVAGFKLLWVLLLATIAGLLLQRLAARLGVVTGLHLAEVCHRQYPKVPRIILWLMVELAIIGSDMQEVIGSAIAINLLSVGRVPLWGGVLITVADTFVFLFLDKYGLRKLEAFFGFLITVMAITFGYEYITVQPNQSQVLRGLFVPSCPGCHTPQIEQAVGIVGAVIMPHNMYLHSALVKSRQVNRANKQEVREANKYFFIESCIALFVSFIINVFVVSVFAEAFFEKTNQQVVDVCTNSSSPYAGLFPADNSTLAVDIYKGGVVLGCYFGPA…
XP_003475828.1	MVLGPEQKMSNENSSGDHGDSASLDAISSTCSNSSFPQSTGQAEEPFATYFDEKIAIPEEEYSCFSFRKLWAFTGPGFLMSIAYLDPGNIESDLQSGAVAGFKLLWVLLLATIAGLLLQRLAARLGVVTGLHLAEVCHRQYPKVPRIILWLMVELAIIGSDMQEVIGSAIAINLLSVGRVPLWGGVLITVADTFVFLFLDKYGLRKLEAFFGFLITVMAITFGYEYITVQPNQSQVLRGLFVPSCPGCHTPQIEQAVGIVGAVIMPHNMYLHSALVKSRQVNRANKQEVREANKYFFIESCIALFVSFIINVFVVSVFAEAFFEKTNQQVVDVCTNSSSPYAGLFPADNSTLAVDIYKGGVVLGCYFGPATLYIWAVGILAAGQSSTMTGTYSGQFVME…
XP_004863029.1	MVLGPEQKMSNENASGDHGDSASLDDISSACSNSSLPQSTGHAEEPFATYFDDKIAIPEEEYSCFSFRKLWAFTGPGFLMSIAYLDPGNIESDLQSGAVAGFKLLWVLLLATIVGLLLQRLAARLGVVTGLHLAEVCHRQYPKVPRIILWLMVELAIIGSDMQEVIGSAIAIHLLSVGRVPLWGGVLITIADTFVFLFLDKYGLRKLEAFFGFLITIMALTFGYEYITVKPNQSQVLKGMFVPSCSGCHTPQIEQAVGIVGAVIMPHNMYLHSALVKSRQVNRANNQEVREANKYFFIESCIALFVSFIINVFVVSVFAEAFFKKTNQQVVDVCKNSSSPYAGLFPEDNSTLAVDIYKGGVVLGCYFGPAALYIWAVGILAAGQSSTMTGTYSGQFVME…
XP_004863028.3	MAQPELDLSGLFVEGAQKRSDAAAGDKVSRHVFLGRTREPDPFSCRPLHQNARGRPSRPPRAPFREGPGQDSVCSSQGPSAYQASGEGYLCRDTLPKIQSYSKDVGPQVSTMVLGPEQKMSNENASGDHGDSASLDDISSACSNSSLPQSTGHAEEPFATYFDDKIAIPEEEYSCFSFRKLWAFTGPGFLMSIAYLDPGNIESDLQSGAVAGFKLLWVLLLATIVGLLLQRLAARLGVVTGLHLAEVCHRQYPKVPRIILWLMVELAIIGSDMQEVIGSAIAIHLLSVGRVPLWGGVLITIADTFVFLFLDKYGLRKLEAFFGFLITIMALTFGYEYITVKPNQSQVLKGMFVPSCSGCHTPQIEQAVGIVGAVIMPHNMYLHSALVKSRQVNRANNQE…
EHB00507.1	MYGPRPVGQSLAGRGLARGAGPGALLWSPRPQDCVSGDSGVESYSKDVGPQVSTMVLGPEQKMSNENASGDHGDSASLDDISSACSNSSLPQSTGHAEEPFATYFDDKIAIPEEEYSCFSFRKLWAFTGPGFLMSIAYLDPGNIESDLQSGAVAGFKLLWVLLLATIVGLLLQRLAARLGVVTGLHLAEVCHRQYPKVPRIILWLMVELAIIGSDMQEVIGSAIAIHLLSVGRVPLWGGVLITIADTFVFLFLDKYGLRKLEAFFGFLITIMALTFGYEASYITVKPNQSQVLKGMFVPSCSGCHTPQIEQAVGIVGAVIMPHNMYLHSALVKSRQVNRANNQEVREANKYFFIESCIALFVSFIINVFVVSVFAEAFFKKTNQQVVDVCKNSSSPYAG…
XP_013363911.1	MKKKQRNTEAAPHCELKSYSKNVDPQVSTMVLGPEQKMSDENASGDHGDCASLDAISSACSNSSLPQSTGHAEEPFTTYFDEKIAIPEEEYSCFSFRKLWAFTGPGFLMSIAYLDPGNIESDLQSGAVAGFKLLWVLLLATIVGLLLQRLAARLGVVTGLHLAEVCHRQYPKVPRIILWLMVELAIIGSDMQEVIGSAIAIHLLSVRRVPLWGGVLITIADTFVFLFLDKYGLRKLEAFFGFLITIMALTFGYEYVTVKPSQSQVLRGMFVPSCPGCRTPQIEQAVGIVGAVIMPHNMYLHSALVKSRQVNRANKQEVREANKYFFVESCIALFVSFIINVFVVSVFAEAFFEKTNQQVVDVCKNNSSPYAGLFPEDNSTLAVDIYKGGVVLGCYFGPA…
XP_017401180.1	MSKDNSLNSVSGEHGESASLGTFNPAYSNPSLPQPSGNSEDEFTTYFNEKISIPEVEYSCFSFRKLWAFTGPGFLMSIAYLDPGNIESDLQSGAVAGFKLLWILLLATLVGLLLQRLAARLGVVTGLHLAEVCHRQYPKVPRIILWLMVELAIIGSDMQEVIGSAIAINLLSVGRIPLWGGVLITIADTFVFLFLDKYGLRKLEAFFGFLITIMALTFGYEYVTVKPSQSQVLKGMFVPSCSGCRTPQIEQAVGIVGAVIMPHNMYLHSALVKSRQINRSNKQEIQEANKYFFIESCIALFVSFIINVFVVSVFAEAFFGKTNEQVVSKPGLWVVVNMRVKLSQGVVLGCYFGPAALYIWAVGILAAGQSSTMTGTYSGQFVMEGFLNLKWSRFARVVL…
XP_008567206.1	MVLGPEQKMSDDNASGDHGDSASLGAINPAYSNSSLSQSTGHSDEPFATYFDEKITIPKEEYSCFSFRKLWAFTGPGFLMSIAYLDPGNIESDLQSGAVAGFKLLWILLLSTIVGLLLQRLAARLGVVTGLHLAEVCHRQYPKVPRIILWLMVELAIIGSDMQEVIGSAIAINLLSVGRVPLWGGVLITIADTFVFLFLDKYGLRKLEAFFGFLITVMALTFGYEYVTVKPSQSQVLKGMFVPSCSGCRTPQIEQAVGIVGAVIMPHNMYLHSALVKVEVCKNSSSPHAGLFPNDNSTLAVDIYKGGVVLGCYFGPAALYIWAVGILAAGQSSTMTGTYSGQFVMEGFLNLKWSRFARVILTRSIAIIPTLLVAVFQDVEHLTGMNDFLNVLQSLQLPF…
ELV10851.1	ESYSKNSGTQVSTMVLSPEQKMPEDNASGDHEDSASFGAINFAYSNSSLPQSTGQPEEPFATYFDEKITIPEEEYSCFSFRKLWAFTGPGFLMSIAYLDPGNIESDLQSGAVAGFKLLWVLLLATIVGLLLQRLAARLGVVTGLHLAEVCHRQYPKVPRIILWLMVELAIIGSDMQEVIGSAIAINLLSVGRVPLWGGVLITIADTFVFLFLDKYGCRTPQIEQAVGIVGAVIMPHNMYLHSALVKSRQVNRANKQEVREANKYFFIESCIALFVSFIINVFVVSVFAEAFFGKTNDQVVEVCRNSSSPHAGLFPNDNSTLAVDIYKGGVVLGCYFGPAALYIWAVGILAAGQSSTMTGTYSGQFVMEGFLNLKWSRFARVILTRSIAIIPTLLVAVFQ…
XP_007537765.2	MVLGPEQKMSDDDTSGDHGDSASLGAINPAYSNASLPLSSAQSEEPFSTYFDEKIAIPEEEYSCFSFRKLWAFTGPGFLMSIAYLDPGNIESDLQSGAVAGFKLLWVLLMATIVGLLLQRLAARLGVVTGLHLAEVCNRQYPKVPRIILWLMVELAIIGSDMQEVIGSAIAINLLSVGRIPLWGGVLITIADTFVFLFLDKYGLRKLEAFFGFLITIMALTFGYEYVTVRPNQREVLRGLFVPSCSGCGTQQIEQAVGIVGAVIMPHNMYLHSALVKSRQVNRANKKEVQEANKYFFIESCIALFVSFIINVFVVSVFAEAFFGKTNEQVVEVCTNSSSPHAGLFPNDNSTLAVDIYKGGVVLGCYFGPAALYIWAVGILAAGQSSTMTGTYSGQFVME…
XP_007537764.2	MKKKQVEMEDVPHCELKSYSKNSDTKVSNMVLGPEQKMSDDDTSGDHGDSASLGAINPAYSNASLPLSSAQSEEPFSTYFDEKIAIPEEEYSCFSFRKLWAFTGPGFLMSIAYLDPGNIESDLQSGAVAGFKLLWVLLMATIVGLLLQRLAARLGVVTGLHLAEVCNRQYPKVPRIILWLMVELAIIGSDMQEVIGSAIAINLLSVGRIPLWGGVLITIADTFVFLFLDKYGLRKLEAFFGFLITIMALTFGYEYVTVRPNQREVLRGLFVPSCSGCGTQQIEQAVGIVGAVIMPHNMYLHSALVKSRQVNRANKKEVQEANKYFFIESCIALFVSFIINVFVVSVFAEAFFGKTNEQVVEVCTNSSSPHAGLFPNDNSTLAVDIYKGGVVLGCYFGPA…
XP_015443792.2	MKKQLKTEAAPHCELKSYSKKTMVLGPEQKMSDDDASEDHGDFADLGAINPAYSNSSLPQSTGHSEEPFSTYFDEKIAVPEEEYSCFSFRKLWAFTGPGFLMSIAYLDPGNIESDLQSGAVAGFKLLWVLLLATIVGLLLQRLAARLGVVTGMHLAEVCHRQYPKIPRIILWLMVELAIIGSDMQEVIGSAIAINLLSKGRVPLWGGVLITIADTFVFLFLDKYGLRKLEAFFGFLITVMALTFGYEYVTVKPSQSEVLKGMFLPSCSGCGTPQIQQAVGIVGAVIMPHNMYLHSALVKSRQVNRAKKQEVQEANKYFFIESCIALFVSFIINVFVVSVFAEAFYQKTNQQVIEVCRNSSSPHTGLIPNDNSTLAVDIYKGGVVLGCYFGPAALYIWAV…
XP_006904652.1	MVLGPEQKMSDDDASEDHGDFADLGAINPAYSNSSLPQSTGHSEEPFSTYFDEKIAVPEEEYSCFSFRKLWAFTGPGFLMSIAYLDPGNIESDLQSGAVAGFKLLWVLLLATIVGLLLQRLAARLGVVTGMHLAEVCHRQYPKIPRIILWLMVELAIIGSDMQEVIGSAIAINLLSKGRVPLWGGVLITIADTFVFLFLDKYGLRKLEAFFGFLITVMALTFGYEYVTVKPSQSEVLKGMFLPSCSGCGTPQIQQAVGIVGAVIMPHNMYLHSALVKSRQVNRAKKQEVQEANKYFFIESCIALFVSFIINVFVVSVFAEAFYQKTNQQVIEVCRNSSSPHTGLIPNDNSTLAVDIYKGGVVLGCYFGPAALYIWAVGILAAGQSSTMTGTYSGQFVME…
XP_011366632.1	MVLGPEQKMSDDDASEDHGDFADLGAINPAYSNSSLPQSTGHSEEPFSTYFDEKIAIPEEEYSCFSFRKLWAFTGPGFLMSIAYLDPGNIESDLQSGAVAGFKLLWVLLLATIVGLLLQRLAARLGVVTGMHLAEVCHRQYPKIPRIILWLMVELAIIGSDMQEVIGSAIAINLLSKGRVPLWGGVLITIADTFVFLFLDKYGLRKLEAFFGFLITVMALTFGYEYVTVKPSQSEVLKGMFLPSCSGCGTPQIQQAVGIVGAVIMPHNMYLHSALVKSRQVNRAKKQEVQEANKYFFIESCIALFVSFIINVFVVSVFAEAFYQKTNQQVIEVCRNSSSPHTGLIPNDNSTLAVDIYKGGVVLGCYFGPAALYIWAVGILAAGQSSTMTGTYSGQFVME…
XP_015998086.1	MVLGPEQKMSDDDASEDHGDFADLGAINPAYSNSSLPQSTGHSEEPFSTYFDEKIAIPEEEYSCFSFRKLWAFTGPGFLMSIAYLDPGNIESDLQSGAVAGFKLLWVLLLATIVGLLLQRLAARLGVVTGMHLAEVCHRQYPKIPRIILWLMVELAIIGSDMQEVIGSAIAINLLSIGRVPLWGGVLITIADTFVFLFLDKYGLRKLEAFFGFLITVMALTFGYEYVTVKPSQSEVLKGMFLPSCSGCGTPQIQQAVGIVGAVIMPHNMYLHSALVKSRQVNRAKKQEVQEANKYFFIESCIALFVSFIINVFVVSVFAEAFYQKTNQQVIEVCRNSSSPHTGLIPNDNSTLAVDIYKGGVVLGCYFGPAALYIWAVGILAAGQSSTMTGTYSGQFVME…
XP_015998089.1	MCKDDSSNDASEDHGDFADLGAINPAYSNSSLPQSTGHSEEPFSTYFDEKIAIPEEEYSCFSFRKLWAFTGPGFLMSIAYLDPGNIESDLQSGAVAGFKLLWVLLLATIVGLLLQRLAARLGVVTGMHLAEVCHRQYPKIPRIILWLMVELAIIGSDMQEVIGSAIAINLLSIGRVPLWGGVLITIADTFVFLFLDKYGLRKLEAFFGFLITVMALTFGYEYVTVKPSQSEVLKGMFLPSCSGCGTPQIQQAVGIVGAVIMPHNMYLHSALVKSRQVNRAKKQEVQEANKYFFIESCIALFVSFIINVFVVSVFAEAFYQKTNQQVIEVCRNSSSPHTGLIPNDNSTLAVDIYKGGVVLGCYFGPAALYIWAVGILAAGQSSTMTGTYSGQFVMEGFLN…
XP_011366633.1	MSKDDSSNDASEDHGDFADLGAINPAYSNSSLPQSTGHSEEPFSTYFDEKIAIPEEEYSCFSFRKLWAFTGPGFLMSIAYLDPGNIESDLQSGAVAGFKLLWVLLLATIVGLLLQRLAARLGVVTGMHLAEVCHRQYPKIPRIILWLMVELAIIGSDMQEVIGSAIAINLLSKGRVPLWGGVLITIADTFVFLFLDKYGLRKLEAFFGFLITVMALTFGYEYVTVKPSQSEVLKGMFLPSCSGCGTPQIQQAVGIVGAVIMPHNMYLHSALVKSRQVNRAKKQEVQEANKYFFIESCIALFVSFIINVFVVSVFAEAFYQKTNQQVIEVCRNSSSPHTGLIPNDNSTLAVDIYKGGVVLGCYFGPAALYIWAVGILAAGQSSTMTGTYSGQFVMEGFLN…
XP_015443798.1	MSKDDSSNDASEDHGDFADLGAINPAYSNSSLPQSTGHSEEPFSTYFDEKIAVPEEEYSCFSFRKLWAFTGPGFLMSIAYLDPGNIESDLQSGAVAGFKLLWVLLLATIVGLLLQRLAARLGVVTGMHLAEVCHRQYPKIPRIILWLMVELAIIGSDMQEVIGSAIAINLLSKGRVPLWGGVLITIADTFVFLFLDKYGLRKLEAFFGFLITVMALTFGYEYVTVKPSQSEVLKGMFLPSCSGCGTPQIQQAVGIVGAVIMPHNMYLHSALVKSRQVNRAKKQEVQEANKYFFIESCIALFVSFIINVFVVSVFAEAFYQKTNQQVIEVCRNSSSPHTGLIPNDNSTLAVDIYKGGVVLGCYFGPAALYIWAVGILAAGQSSTMTGTYSGQFVMEGFLN…
ELK19033.1	MLDIQEHSFPPYRLLVAESREMMASYRPCLVLLPQLFTRAQDGRAVVIKSYSKKTMVLGPEQKMSDDDASEDHGDFADLGAINPAYSNSSLPQSTGHSEEPFSTYFDEKIAVPEEEYSCFSFRKLWAFTGPGFLMSIAYLDPGNIESDLQSGAVAGFKLLWVLLLATIVGLLLQRLAARLGVVTGMHLAEVCHRQYPKIPRIILWLMVELAIIGSDMQEVIGSAIAINLLSKGRVPLWGGVLITIADTFVFLFLDKYGLRKLEAFFGFLITVMALTFGYEASYVTVKPSQSEVLKGMFLPSCSGCGTPQIQQAVGIVGAVIMPHNMYLHSALVKSRQVNRAKKQEVQEANKYFFIESCIALFVSFIINVFVVSVFAEAFYQKTNQQVIEVCRNSSSPHT…
XP_015443799.1	MSKDDSSNDASEDHGDFADLGAINPAYSNSSLPQSTGHSEEPFSTYFDEKIAVPEEEYSCFSFRKLWAFTGPGFLMSIAYLDPGNIESDLQSGAVAGFKLLWVLLLATIVGLLLQRLAARLGVVTGMHLAEVCHRQYPKIPRIILWLMVELAIIGSDMQEVIGSAIAINLLSKGRVPLWGGVLITIADTFVFLFLDKYGLRKLEAFFGFLITVMALTFGYEYVTVKPSQSEVLKGMFLPSCSGCGTPQIQQAVGIVGAVIMPHNMYLHSALVKSRQVNRAKKQEVQEANKYFFIESCIALFVSFIINVFVVSVFAEAFYQKTNQQVIEVCRNSSSPHTGLIPNDNSTLAVDIYKGGVVLGCYFGPAALYIWAVGILAAGQSSTMTGTYSGQFVMEGFLN…
XP_023391183.1	MVLGPEQKMSDDDASEDHGDFADLGAINPAYSNSSLPQSTGHSEEPFSTYFDEKIAIPEEEYSCFSFRKLWAFTGPGFLMSIAYLDPGNIESDLQSGAVAGFKLLWVLLLATIVGLLLQRLAARLGVVTGMHLAEVCHRQYPKIPRIILWLMVELAIIGSDMQEVIGSAIAINLLSKGRVPLWGGVLITIADTFVFLFLDKYGLRKLEAFFGFLITVMALTFGYEYVTVKPSQSEVLKGMFLPSCSGCGTPQIQQAVGIVGAVIMPHNMYLHSALVKSRQVNRAKKQEVQEANKYFFIESCIALFVSFIINVFVVSVFAEAFYQKTNQQVIEVCRNSSSPHTGLIPNDNSTLAVDIYKGGVVLGCYFGPAALYIWAVGILAAGQSSTMTGTYSGQFVME…
XP_015443791.1	MVLGPEQKMSDDDASEDHGDFADLGAINPAYSNSSLPQSTGHSEEPFSTYFDEKIAVPEEEYSCFSFRKLWAFTGPGFLMSIAYLDPGNIESDLQSGAVAGFKLLWVLLLATIVGLLLQRLAARLGVVTGMHLAEVCHRQYPKIPRIILWLMVELAIIGSDMQEVIGSAIAINLLSKGRVPLWGGVLITIADTFVFLFLDKYGLRKLEAFFGFLITVMALTFGYEYVTVKPSQSEVLKGMFLPSCSGCGTPQIQQAVGIVGAVIMPHNMYLHSALVKSRQVNRAKKQEVQEANKYFFIESCIALFVSFIINVFVVSVFAEAFYQKTNQQVIEVCRNSSSPHTGLIPNDNSTLAVDIYKGGVVLGCYFGPAALYIWAVGILAAGQSSTMTGTYSGQFVME…
XP_016056770.1	MVLGPEQKMPDDDVSEDHGDSASLGAINPAYSNSSLPQSTGTSEDPFTTYFDEKVPIPEEEYSCFSFRKLWAFTGPGFLMSIAYLDPGNIESDLQSGAVAGFKLLWVLLLATIVGLLLQRLAARLGVVTGLHLAEVCHRQYPKVPRIILWLMVELAIIGSDMQEVIGSAIAINLLSVGRVPLWGGVLITIADTFVFLFLDKYGLRKLEAFFGFLITVMALTFGYEYVTVRPSQSEVLKGMFLPSCSGCGTPQIQQAVGIVGAVIMPHNMYLHSALVKSRQVNRAKKQEVREANKYFFIESCIALFVSFIINVFVVSVFAEAFFDKTNQQVIEVCRNSSSPHAGLFPADNSTLAVDIYKGGVVLGCYFGPAALYIWAVGILAAGQSSTMTGTYSGQFVME…
XP_016056768.1	MVLGPEQKMPDDDVSEDHGDSASLGAINPAYSNSSLPQSTGTSEDPFTTYFDEKVPIPEEEYSCFSFRKLWAFTGPGFLMSIAYLDPGNIESDLQSGAVAGFKLLWVLLLATIVGLLLQRLAARLGVVTGLHLAEVCHRQYPKVPRIILWLMVELAIIGSDMQEVIGSAIAINLLSVGRVPLWGGVLITIADTFVFLFLDKYGLRKLEAFFGFLITVMALTFGYEYVTVRPSQSEVLKGMFLPSCSGCGTPQIQQAVGIVGAVIMPHNMYLHSALVKSRQVNRAKKQEVREANKYFFIESCIALFVSFIINVFVVSVFAEAFFDKTNQQVIEVCRNSSSPHAGLFPADNSTLAVDIYKGGVVLGCYFGPAALYIWAVGILAAGQSSTMTGTYSGQFVME…
XP_005869321.1	MKKQRKTEAAPQCELKSYSKNTMVLGPEQKMPDGAASEDYGDSASLGAINPAYSSSSLPQSTGTSEEPFTTYFDEKIPIPEEEHSCFSFRKLWAFTGPGFLMSIAYLDPGNIESDLQSGAVAGFKLLWVLLLATIVGLLLQRLAARLGVVTGLHLAEVCYRQYPKVPRIILWLMVELAIIGSDMQEVIGSAIAINLLSVGRVPLWGGVLITIADTFVFLFLDKYGLRKLEAFFGFLITVMALTFGYEYITVRPNQSEVLKGMFLPSCSGCGTPQIQQAVGIVGAVIMPHNMYLHSALVKSRQINRAKKQEVREANKYFFIESCIALFVSFIINVFVVSVFAEAFFEKTNQQVIEVCKNSSSPHTGLIPDDNSTLAVDIFKGGIVLGCYFGPAALYIWAV…
EPQ09606.1	MKKQRKTEAAPQCELKSYSKNTMVLGPEQKMPDGAASEDYGDSASLGAINPAYSSSSLPQSTGTSEEPFTTYFDEKIPIPEEEHSCFSFRKLWAFTGPGFLMSIAYLDPGNIESDLQSGAVAGFKLLWVLLLATIVGLLLQRLAARLGVVTGLHLAEVCYRQYPKVPRIILWLMVELAIIGSDMQEVIGSAIAINLLSVGRVPLWGGVLITIADTFVFLFLDKYGLRKLEAFFGFLITVMALTFGYEAMRPNQSEVLKGMFLPSCSGCGTPQIQQAVGIVGAVIMPHNMYLHSALVKSRQINRAKKQEVREANKYFFIESCIALFVSFIINVFVVSVFAEAFFEKTNQQVIEVCKNSSSPHTGLIPDDNSTLAVDIFKGGIVLGCYFGPAALYIWAVGI…
XP_006091626.1	MKKQRKTEAAPQCELKSYSKNTMVLGPEQKMPDGAASEDYGDSASLGAINPAYSSSSLPQSPGTSGEPFTTYFDEKIPIPEEEHSCFSFRKLWAFTGPGFLMSIAYLDPGNIESDLQSGAVAGFKLLWVLLLATIVGLLLQRLAARLGVVTGLHLAEVCYRQYPKVPRIILWLMVELAIIGSDMQEVIGSAIAINLLSVGRVPLWGGVLITIADTFVFLFLDKYGLRKLEAFFGFLITVMALTFGYEYITVRPNQSEVLKGMFLPSCSGCGTPQIQQAVGIVGAVIMPHNMYLHSALVKSRQVNRAKKQEVREANKYFFIESCIALFVSFIINVFVVSVFAEAFFEKTNQQVIEVCKNSSSPHTGLIPDDNSTLAVDIFKGGIVLGCYFGPAALYIWAV…
XP_015415118.1	MKKQRKTEAAPQCELKSYSKNTMVLGPEQKMPDGAAAEDYGDSASLGAINPAYSSSSLPQSPRTSEEPFTTYFDEKIPIPEEEHSCFSFRKLWAFTGPGFLMSIAYLDPGNIESDLQSGAVAGFKLLWVLLLATIVGLLLQRLAARLGVVTGLHLAEVCYRQYPKVPRIILWLMVELAIIGSDMQEVIGSAIAINLLSVGRVPLWGGVLITIADTFVFLFLDKYGLRKLEAFFGFLITVMALTFGYEYITVRPNQSKVLKGMFLPSCSGCGTPQIQQAVGIVGAVIMPHNMYLHSALVKSRQVNRAKKQEVREANKYFFIESCIALFVSFIINVFVVSVFAEAFFEKTHQQVIEVCKNSSSPHTGLIPDDNSTLAVDIFKGGIVLGCYFGPAALYIWAV…
XP_023612133.1	MVLGPEQKMPDGAASEDYGDSASLGAINPAYSSSSLPQSPGTSGEPFTTYFDEKIPIPEEEHSCFSFRKLWAFTGPGFLMSIAYLDPGNIESDLQSGAVAGFKLLWVLLLATIVGLLLQRLAARLGVVTGLHLAEVCYRQYPKVPRIILWLMVELAIIGSDMQEVIGSAIAINLLSVGRVPLWGGVLITIADTFVFLFLDKYGLRKLEAFFGFLITVMALTFGYEYITVRPNQSEVLKGMFLPSCSGCGTPQIQQAVGIVGAVIMPHNMYLHSALVKSRQVNRAKKQEVREANKYFFIESCIALFVSFIINVFVVSVFAEAFFEKTNQQVIEVCKNSSSPHTGLIPDDNSTLAVDIFKGGIVLGCYFGPAALYIWAVGILAAGQSSTMTGTYSGQFVME…
XP_005869322.1	MVLGPEQKMPDGAASEDYGDSASLGAINPAYSSSSLPQSTGTSEEPFTTYFDEKIPIPEEEHSCFSFRKLWAFTGPGFLMSIAYLDPGNIESDLQSGAVAGFKLLWVLLLATIVGLLLQRLAARLGVVTGLHLAEVCYRQYPKVPRIILWLMVELAIIGSDMQEVIGSAIAINLLSVGRVPLWGGVLITIADTFVFLFLDKYGLRKLEAFFGFLITVMALTFGYEYITVRPNQSEVLKGMFLPSCSGCGTPQIQQAVGIVGAVIMPHNMYLHSALVKSRQINRAKKQEVREANKYFFIESCIALFVSFIINVFVVSVFAEAFFEKTNQQVIEVCKNSSSPHTGLIPDDNSTLAVDIFKGGIVLGCYFGPAALYIWAVGILAAGQSSTMTGTYSGQFVME…
XP_006757146.1	MVLGPEQKMPDGAAAEDYGDSASLGAINPAYSSSSLPQSPRTSEEPFTTYFDEKIPIPEEEHSCFSFRKLWAFTGPGFLMSIAYLDPGNIESDLQSGAVAGFKLLWVLLLATIVGLLLQRLAARLGVVTGLHLAEVCYRQYPKVPRIILWLMVELAIIGSDMQEVIGSAIAINLLSVGRVPLWGGVLITIADTFVFLFLDKYGLRKLEAFFGFLITVMALTFGYEYITVRPNQSKVLKGMFLPSCSGCGTPQIQQAVGIVGAVIMPHNMYLHSALVKSRQVNRAKKQEVREANKYFFIESCIALFVSFIINVFVVSVFAEAFFEKTHQQVIEVCKNSSSPHTGLIPDDNSTLAVDIFKGGIVLGCYFGPAALYIWAVGILAAGQSSTMTGTYSGQFVME…
XP_005869323.1	MSKEVSLSAASEDYGDSASLGAINPAYSSSSLPQSTGTSEEPFTTYFDEKIPIPEEEHSCFSFRKLWAFTGPGFLMSIAYLDPGNIESDLQSGAVAGFKLLWVLLLATIVGLLLQRLAARLGVVTGLHLAEVCYRQYPKVPRIILWLMVELAIIGSDMQEVIGSAIAINLLSVGRVPLWGGVLITIADTFVFLFLDKYGLRKLEAFFGFLITVMALTFGYEYITVRPNQSEVLKGMFLPSCSGCGTPQIQQAVGIVGAVIMPHNMYLHSALVKSRQINRAKKQEVREANKYFFIESCIALFVSFIINVFVVSVFAEAFFEKTNQQVIEVCKNSSSPHTGLIPDDNSTLAVDIFKGGIVLGCYFGPAALYIWAVGILAAGQSSTMTGTYSGQFVMEGFLN…
XP_006757147.1	MSKEVSLSAAAEDYGDSASLGAINPAYSSSSLPQSPRTSEEPFTTYFDEKIPIPEEEHSCFSFRKLWAFTGPGFLMSIAYLDPGNIESDLQSGAVAGFKLLWVLLLATIVGLLLQRLAARLGVVTGLHLAEVCYRQYPKVPRIILWLMVELAIIGSDMQEVIGSAIAINLLSVGRVPLWGGVLITIADTFVFLFLDKYGLRKLEAFFGFLITVMALTFGYEYITVRPNQSKVLKGMFLPSCSGCGTPQIQQAVGIVGAVIMPHNMYLHSALVKSRQVNRAKKQEVREANKYFFIESCIALFVSFIINVFVVSVFAEAFFEKTHQQVIEVCKNSSSPHTGLIPDDNSTLAVDIFKGGIVLGCYFGPAALYIWAVGILAAGQSSTMTGTYSGQFVMEGFLN…
ELK35362.1	MKLGVVALHYGCAESYSKNTMVLGPEQKMPDGAAAEDYGDSASLGAINPAYSSSSLPQSPRTSEEPFTTYFDEKIPIPEEEHSCFSFRKLWAFTGPGFLMSIAYLDPGNIESDLQSGAVAGFKLLWVLLLATIVGLLLQRLAARLGVVTGLHLAEVCYRQYPKVPRIILWLMVELAIIGSDMQEVIGSAIAINLLSVGRVPLWGGVLITIADTFVFLFLDKYGLRKLEAFFGFLITVMALTFGYEASYITVRPNQSKVLKGMFLPSCSGCGTPQIQQAVGIVGAVIMPHNMYLHSALVKSRQVNRAKKQEVREANKYFFIESCIALFVSFIINVFVVSVFAEAFFEKTHQQVIEVCKNSSSPHTGLIPDDNSTLAVDIFKGGIVLGCYFGPAALYIWAV…
XP_028000381.1	MKKPRKTEAAPHCELKSYSKNTMVLGPEQKMPDGAASEDYGDSASLGAINPAYSSSSLPQTTGTSEEPFTTYFDEKIPIPEEEVSDRSLEEKVVMLLWVLLLATIVGLLLQRLAARLGVVTGLHLAEVCYRQYPKVPRIVLWLMVELAIIGSDMQEVIGSAIAINLLSVGRVPLWGGVLITIADTFVFLFLDKYGLRKLEAFFGFLITVMALTFGYEYITVRPNQSEVLKGMFLPSCSGCGTPQIQQAVGIVGAVIMPHNMYLHSALVKSRQVNRAKKQEVREANKYFFIESCIALFVSFIINVFVVSVFAEAFFEKTNQQVIEVCKNSSSPHTGLIPDDNSTLAVDIFKGGIVLGCYFGPAALYIWAVGILAAGQSSTMTGTYSGQFVMEGFLNLRWS…
XP_012588002.1	MVLDPEQKMPDDGASGDNEDSASLGAINPAYSNSSLPQSTRHSEEPFTTYFDEKISIPEEEYSCFSFRKLWAFTGPGFLMSIAYLDPGNIESDLQSGAVAGFKLLWVLLLATIVGLLLQRLAARLGVVTGLHLAEVCHRQYPRVPRIILWLMVELAIIGSDMQEVIGSAIAINLLSVGRIPLWGGVLITIADTFVFLFLDKYGLRKLEAFFGFLITIMALTFGYEYVTVKPNQSEVLKGMFLPSCSGCRTPQVEQAVGIVGAVIMPHNMYLHSALVKSRQVNRAKKEEVREANKYFFIESCIALFVSFIINVFVVSVFAEAFFGKTNEQVVEVCRNSSSPHTDLFPDNNSTLTVDIYKGGVVLGCYFGPAALYIWAVGILAAGQSSTMTGTYSGQFVME…
XP_012588000.1	MVLDPEQKMPDDGASGDNEDSASLGAINPAYSNSSLPQSTRHSEEPFTTYFDEKISIPEEEYSCFSFRKLWAFTGPGFLMSIAYLDPGNIESDLQSGAVAGFKLLWVLLLATIVGLLLQRLAARLGVVTGLHLAEVCHRQYPRVPRIILWLMVELAIIGSDMQEVIGSAIAINLLSVGRIPLWGGVLITIADTFVFLFLDKYGLRKLEAFFGFLITIMALTFGYEYVTVKPNQSEVLKGMFLPSCSGCRTPQVEQAVGIVGAVIMPHNMYLHSALVKSRQVNRAKKEEVREANKYFFIESCIALFVSFIINVFVVSVFAEAFFGKTNEQVVEVCRNSSSPHTDLFPDNNSTLTVDIYKGGVVLGCYFGPAALYIWAVGILAAGQSSTMTGTYSGQFVME…
XP_011903676.1	MYSCFSFRKLWAFTGPGFLMSIAYLDPGNIESDLQSGAVAGFKLLWILLLATLVGLLLQRLAARLGVVTGLHLAEVCHRQYPKVPRIILWLMVELAIIGSDMQEVIGSAIAINLLSVGRIPLWGGVLITIADTFVFLFLDKYGLRKLEAFFGFLITIMALTFGYEYVTVKPSQSQVLKGMFVPSCSGCRTPQIEQAVGIVGAVIMPHNMYLHSALVKSRQVNRNNKQEVREANKYFFIESCIALFVSFIINVFVVSVFAEAFFGKTNEQVVEVCTNTSSPHAGLFPKDNSTLAVDIYKGGVVLGCYFGPAALYIWAVGILAAGQSSTMTGTYSGQFVMEGFLNLKWSRFARVILTRSIAIIPTLLVAVFQDVEHLTGMNDFLNVLQSLQLPFALIPILT…
XP_012874273.1	MVLGPEQKMPDGDASGDHGDTVSVGAINPAYSNSSLTQSTEPSEEPFATYFDEKIAIPEEEYSCFSFRKLWAFTGPGFLMSIAYLDPGNIESDLQSGAVAGFKLLWVLLLATIVGLLLQRLAARLGVVTGLHLAEVCHRQYPKVPRIILWLMVELAIIGSDMQEVIGSAIAINLLSVGRVPLWGGVLITIADTFVFLFLDKYGLRKLEAFFGFLITIMALTFGYEYVTVKPNQSQVLKGMFVPSCSGCHTPQIEQAVGIVGAVIMPHNMYLHSALVKSRQVNRANKQEVREANKYFFIESCIALFVSFIINVFVVSVFAEAFFGKTNDQVVGVCKNSSSPHSGLFPEDNSTLAVDIYKGGVVLGCYFGPAALYIWAVGILAAGQSSTMTGTYSGQFVME…
XP_012296807.1	MYSCFSFRKLWAFTGPGFLMSIAYLDPGNIESDLQSGAVAGFKLLWILLLATLVGLLLQRLAARLGVVTGLHLAEVCHHQYPKVPRIILWLMVELAIIGSDMQEVIGSAIAINLLSVGRIPLWGGVLITIADTFVFLFLDKYGLRKLEAFFGFLITIMALTFGYEYVTVKPSQSQVLKGMFVPSCSGCRTPQIEQAVGIVGAVIMPHNMYLHSALVKSRQINRSNKQEIREANKYFFIESCIALFVSFIINVFVVSVFAEAFFGKTNEQVVEVCTNSSSPHAGLFPNDNSTLAVDIYKGGVVLGCYFGPAALYIWAVGILAAGQSSTMTGTYSGQFVMEGFLNLKWSRFARVVLTRSIAIIPTLLVSVFQDVESLTGMNDFLNVLQSLQLPFALIPILT…
VFV44682.1	MKLHTVSSNPILRTWTLSHPPWYWVLNRRCQMMMLLETMGTLPVLVPSTLPIVTHLFPSPLGTHRSPSPPTLMRRLPFLKRSFRKLWAFTGPGFLMSIAYLDPGNIESDLQSGAVAGFKLLWVLLLATMVGLLLQRLAARLGVVTGLHLAEVCHRQYPRVPRIILWLMVELAIIGSDMQEVIGSAIAINLLSVGRVPLWGGVLITIADTFVFLFLDKYGLRKLEAFFGFLITIMALTFGYEYVTVKPSQSQVLKGMFLPSCPGCHTPQIEQAVGIVGAVIMPHNMYLHSALVKSRQVNRANKQEVREANKYFFIESCIALFVSFIINVFVVSVFAEAFFEKTNDQVVAVCRNASSPHTSLFPDDNSTLAVDIYKGGVVLGCYFGPAALYIWAVGILAAG…
XP_028388620.1	MKKQHKMEAAPHCELKSYSKNTMVLGPEQKTPDDDASEDHGDLAHLGAINPAYSDSSLPQSTGSSNEPFTTYFDEKIAVPEEEYSCFSFRKLWAFTGPGFLMSIAYLDPGNIESDLQSGAVAGFKLLWVLLLATIVGLLLQRLAARLGVVTGMHLAEVCHRQYPKVPRIILWLMVELAIIGSDMQEVIGSAIAINLLSIGRVPLWGGVLITIADTFVFLFLDKYGLRKLEAFFGFLITVMALTFGYEYITVRPNQSDVLKGMFVPSCSDCGTPQVQQAVGIVGAVIMPHNMYLHSALVKSRQVNRAKKEEVREANKYFFIESCIALFVSFIINVFVVSVFAEAFYWKTNQQVIEVCRNSSSPHTHLFPDDNSTLAVDIYKGGVVLGCFFGPAALYIWAV…
XP_028388623.1	MVLGPEQKTPDDDASEDHGDLAHLGAINPAYSDSSLPQSTGSSNEPFTTYFDEKIAVPEEEYSCFSFRKLWAFTGPGFLMSIAYLDPGNIESDLQSGAVAGFKLLWVLLLATIVGLLLQRLAARLGVVTGMHLAEVCHRQYPKVPRIILWLMVELAIIGSDMQEVIGSAIAINLLSIGRVPLWGGVLITIADTFVFLFLDKYGLRKLEAFFGFLITVMALTFGYEYITVRPNQSDVLKGMFVPSCSDCGTPQVQQAVGIVGAVIMPHNMYLHSALVKSRQVNRAKKEEVREANKYFFIESCIALFVSFIINVFVVSVFAEAFYWKTNQQVIEVCRNSSSPHTHLFPDDNSTLAVDIYKGGVVLGCFFGPAALYIWAVGILAAGQSSTMTGTYSGQFVME…
XP_028388621.1	MQQSFATATFFEEPKGSVMPRDVSLHDASEDHGDLAHLGAINPAYSDSSLPQSTGSSNEPFTTYFDEKIAVPEEEYSCFSFRKLWAFTGPGFLMSIAYLDPGNIESDLQSGAVAGFKLLWVLLLATIVGLLLQRLAARLGVVTGMHLAEVCHRQYPKVPRIILWLMVELAIIGSDMQEVIGSAIAINLLSIGRVPLWGGVLITIADTFVFLFLDKYGLRKLEAFFGFLITVMALTFGYEYITVRPNQSDVLKGMFVPSCSDCGTPQVQQAVGIVGAVIMPHNMYLHSALVKSRQVNRAKKEEVREANKYFFIESCIALFVSFIINVFVVSVFAEAFYWKTNQQVIEVCRNSSSPHTHLFPDDNSTLAVDIYKGGVVLGCFFGPAALYIWAVGILAAGQS…
XP_028388622.1	MVLGPEQKTPDDDASEDHGDLAHLGAINPAYSDSSLPQSTGSSNEPFTTYFDEKIAVPEEEYSCFSFRKLWAFTGPGFLMSIAYLDPGNIESDLQSGAVAGFKLLWVLLLATIVGLLLQRLAARLGVVTGMHLAEVCHRQYPKVPRIILWLMVELAIIGSDMQEVIGSAIAINLLSIGRVPLWGGVLITIADTFVFLFLDKYGLRKLEAFFGFLITVMALTFGYEYITVRPNQSDVLKGMFVPSCSDCGTPQVQQAVGIVGAVIMPHNMYLHSALVKSRQVNRAKKEEVREANKYFFIESCIALFVSFIINVFVVSVFAEAFYWKTNQQVIEVCRNSSSPHTHLFPDDNSTLAVDIYKGGVVLGCFFGPAALYIWAVGILAAGQSSTMTGTYSGQFVME…
XP_024431154.1	MVLGRGQKIPNDDASEDHGDSAHLGAINPAYSNSSLPQSTGSSDEPFTTYFDEKIAIPEGEYSCFSFRKLWAFTGPGFLMSIAYLDPGNIESDLQSGAVAGFKLLWVLLLATIVGLLLQRLAARLGVVTGMHLAEVCHRQYPKVPRIILWLMVELAIIGSDMQEVIGSAIAINLLSVGRVPLWGGVLITIADTFVFLFLDKYGLRKLEAFFGFLITVMAFTFGYEYITVRPNQSDVLKGMFVPSCSGCGTPQVQQAVGIVGAVIMPHNMYLHSALVKSRQINRAKKEEVREANKYFFIESCIALFVSFIINVFVVSVFAEAFFWKTNQQVIEVCRNSSSPHTDLFPDDNSTLAVDIYKGGVVLGCFFGPAALYIWAVGILAAGQSSTMTGTYSGQFVME…
XP_011903677.1	MRKKQLKTEAAPHCELKSYSKNSATQVSTMVLGLEQKMSDDSVSGDHGESACLGTVNPVSSNPSLPRSPGDSEEYFATYFNEKISIPEEEYSCFSFRKLWAFTGPGFLMSIAYLDPGNIESDLQSGAVAGFKLLWILLLATLVGLLLQRLAARLGVVTGLHLAEVCHRQYPKVPRIILWLMVELAIIGSDMQEVIGSAIAINLLSVGRIPLWGGVLITIADTFVFLFLDKYGLRKLEAFFGFLITIMALTFGYEYVTVKPSQSQVLKGMFVPSCSGCRTPQIEQAVGIVGAVIMPHNMYLHSALVKSRQVNRNNKQEVREANKYFFIESCIALFVSFIINVFVVSVFAEAFFGKTNEQVVEVCTNTSSPHAGLFPKDNSTLAVDIYKGGVVLGCYFGPA…
XP_026891945.1	MKKQPKKDEAPHCELKSYSKNLDTQSSTMVLGPEQKMPDDDASGDHGDPASLGTLNPAYSNSSLSQSPGHSQEPFTTYFDEKIAIPEEEYSCFSFRKLWAFTGPGFLMSIAYLDPGNIESDLQSGAVAGFKLLWVLLLATMVGLLLQRLAARLGVVTGLHLAEVCHRQYPRVPRIILWLMVELAIIGSDMQEVIGSAIAINLLSVGRVPLWGGVLITIADTFVFLFLDKYGLRKLEAFFGFLITIMALTFGYEYVTVKPSQSQVLKGMFLPSCPGCHTPQIEQAVGIVGAVIMPHNMYLHSALVKSRQVNRANKQEVREANKYFFIESCIALFVSFIINVFVVSVFAEAFFEKTNDQVVAVCRNASSPHTSLFPDDNSTLAVDIYKGGVVLGCYFGPAA…
PNI33210.1	MTVFLEIMGSLPVLYSCFSFRKLWAFTGPGFLMSIAYLDPGNIESDLQSGAVAGFKLLWILLLATLVGLLLQRLAARLGVVTGLHLAEVCHRQYPKVPRVILWLMVELAIIGSDMQEVIGSAIAINLLSVGRIPLWGGVLITIADTFVFLFLDKYGLRKLEAFFGFLITIMALTFGYEYVTVKPSQSQVLKGMFVPSCSGCRTPQIEQAVGIVGAVIMPHNMYLHSALVKSRQVNRNNKQEVREANKYFFIESCIALFVSFIINVFVVSVFAEAFFGKTNEQVVEVCTNTSSPHAGLFPKDNSTLAVDIYKGGVVLGCYFGPAALYIWAVGILAAGQSSTMTGTYSGQFVMEGFLNLKWSRFARVVLTRSIAIIPTLLVAVFQDVEHLTGMNDFLNVLQ…
XP_003405826.1	MVLGADQKMPDDNGSGDHGDTASLGAINPAYSNSSLPESTGHSAEPFTTYFDEKITIPEEEYSCFSFRKLWAFTGPGFLMSIAYLDPGNIESDLQSGAVAGFKLLWVLLLATIVGLLLQRLAARLGVVTGLHLAEVCHQQYPKVPRIILWLMVELAIIGSDMQEVIGSAIAINLLSVGRVPLWGGVLITIADTFVFLFLDKYGLRKLEAFFGFLITVMAITFGYEYVTVKPDQRQVLRGMFVPSCSGCTTPQVEQAVGIVGAVIMPHNMYLHSALVKSRQVNRAKKHEVQEANKYFFIESCIALFVSFVINVFVVSVFAEAFFEKTNEQVVQVCKNTSIPWTGLFPDDNSTLTVDIYKGGVVLGCYFGPAALYIWAVGILAAGQSSTMTGTYSGQFVME…
XP_023412060.1	MTKDNSFNNGSGDHGDTASLGAINPAYSNSSLPESTGHSAEPFTTYFDEKITIPEEEYSCFSFRKLWAFTGPGFLMSIAYLDPGNIESDLQSGAVAGFKLLWVLLLATIVGLLLQRLAARLGVVTGLHLAEVCHQQYPKVPRIILWLMVELAIIGSDMQEVIGSAIAINLLSVGRVPLWGGVLITIADTFVFLFLDKYGLRKLEAFFGFLITVMAITFGYEYVTVKPDQRQVLRGMFVPSCSGCTTPQVEQAVGIVGAVIMPHNMYLHSALVKSRQVNRAKKHEVQEANKYFFIESCIALFVSFVINVFVVSVFAEAFFEKTNEQVVQVCKNTSIPWTGLFPDDNSTLTVDIYKGGVVLGCYFGPAALYIWAVGILAAGQSSTMTGTYSGQFVMEGFLN…
XP_010594926.1	MVLGADQKMPDDNGSGDHGDTASLGAINPAYSNSSLPESTGHSAEPFTTYFDEKITIPEEEYSCFSFRKLWAFTGPGFLMSIAYLDPGNIESDLQSGAVAGFKLLWVLLLATIVGLLLQRLAARLGVVTGLHLAEVCHQQYPKVPRIILWLMVELAIIGSDMQEVIGSAIAINLLSVGRVPLWGGVLITIADTFVFLFLDKYGLRKLEAFFGFLITVMAITFGYEYVTVKPDQRQVLRGMFVPSCSGCTTPQVEQAVGIVGAVIMPHNMYLHSALVKSRQVNRAKKHEVQEANKYFFIESCIALFVSFVINVFVVSVFAEAFFEKTNEQVVQVCKNTSIPWTGLFPDDNSTLTVDIYKGGVVLGCYFGPAALYIWAVGILAAGQSSTMTGTYSGQFVME…
XP_023412065.1	MTKDNSFNNGSGDHGDTASLGAINPAYSNSSLPESTGHSAEPFTTYFDEKITIPEEEYSCFSFRKLWAFTGPGFLMSIAYLDPGNIESDLQSGAVAGFKLLWVLLLATIVGLLLQRLAARLGVVTGLHLAEVCHQQYPKVPRIILWLMVELAIIGSDMQEVIGSAIAINLLSVGRVPLWGGVLITIADTFVFLFLDKYGLRKLEAFFGFLITVMAITFGYEYVTVKPDQRQVLRGMFVPSCSGCTTPQVEQAVGIVGAVIMPHNMYLHSALVKSRQVNRAKKHEVQEANKYFFIESCIALFVSFVINVFVVSVFAEAFFEKTNEQVVQVCKNTSIPWTGLFPDDNSTLTVDIYKGGVVLGCYFGPAALYIWAVGILAAGQSSTMTGTYSGQFVMEGFLN…
XP_023412076.1	MVLGADQKMPDDNGSGDHGDTASLGAINPAYSNSSLPESTGHSAEPFTTYFDEKITIPEEEYSCFSFRKLWAFTGPGFLMSIAYLDPGNIESDLQSGAVAGFKVPRIILWLMVELAIIGSDMQEVIGSAIAINLLSVGRVPLWGGVLITIADTFVFLFLDKYGLRKLEAFFGFLITVMAITFGYEYVTVKPDQRQVLRGMFVPSCSGCTTPQVEQAVGIVGAVIMPHNMYLHSALVKSRQVNRAKKHEVQEANKYFFIESCIALFVSFVINVFVVSVFAEAFFEKTNEQVVQVCKNTSIPWTGLFPDDNSTLTVDIYKGGVVLGCYFGPAALYIWAVGILAAGQSSTMTGTYSGQFVMEGFLNLKWSRFARVILTRSIAIIPTLLVSVFQDVEHLTGMN…
XP_023412083.1	MVLGADQKMPDDNGSGDHGDTASLGAINPAYSNSSLPESTGHSAEPFTTYFDEKITIPEEELLWVLLLATIVGLLLQRLAARLGVVTGLHLAEVCHQQYPKVPRIILWLMVELAIIGSDMQEVIGSAIAINLLSVGRVPLWGGVLITIADTFVFLFLDKYGLRKLEAFFGFLITVMAITFGYEYVTVKPDQRQVLRGMFVPSCSGCTTPQVEQAVGIVGAVIMPHNMYLHSALVKSRQVNRAKKHEVQEANKYFFIESCIALFVSFVINVFVVSVFAEAFFEKTNEQVVQVCKNTSIPWTGLFPDDNSTLTVDIYKGGVVLGCYFGPAALYIWAVGILAAGQSSTMTGTYSGQFVMEGFLNLKWSRFARVILTRSIAIIPTLLVSVFQDVEHLTGMNDF…
XP_004601524.1	MKKQAKADAAPQCELKSYSKTVNNQVSNMVLGPEQKIPDDDASGDHGDSASLGAINPAYSTSSIPPSNGHAEEPFSTYFDEKIPIPEEEYSCFSFRKLWAFTGPGFLMSIAYLDPGNIESDLQSGAVAGFKLLWVLLLATIVGLLLQRLAARLGVVTGLHLAEVCHRQYPKVPRIVLWLMVETAIIGSDMQEVIGSAIAINLLSAGKIPLWGGVLITIADTFVFLFLDKYGLRKLEAFFGFLITIMALTFGYEYVTVKPNQAQVLRGLFVPSCSGCSTPQVEQAVGIVGAVIMPHNMYLHSALVKSRQVNRANKKEVREANKYFFIESCIALFVSFIINVFVVSVFAEAFFGKSNKQVGEVCRNSSSNYTHLFPDDNSTLTVDIYKGGIVLGCYFGPAA…
XP_012789853.1	MKKQAKADAAPQCELKSYSKTVNNQVSNMVLGPEQKIPDDDASGDHGDSASLGAINPAYSTSSIPPSNGHAEEPFSTYFDEKIPIPEEEYSCFSFRKLWAFTGPGFLMSIAYLDPGNIESDLQSGAVAGFKLLWVLLLATIVGLLLQRLAARLGVVTGLHLAEVCHRQYPKVPRIVLWLMVETAIIGSDMQEVIGSAIAINLLSAGKIPLWGGVLITIADTFVFLFLDKYGLRKLEAFFGFLITIMALTFGYEYVTVKPNQAQVLRGLFVPSCSGCSTPQVEQAVGIVGAVIMPHNMYLHSALVKSRQVNRANKKEVREANKYFFIESCIALFVSFIINVFVVSVFAEAFFGKSNKQVGEVCRNSSSNYTHLFPDDNSTLTVDIYKGGIVLGCYFGPAA…
XP_004601525.1	MVLGPEQKIPDDDASGDHGDSASLGAINPAYSTSSIPPSNGHAEEPFSTYFDEKIPIPEEEYSCFSFRKLWAFTGPGFLMSIAYLDPGNIESDLQSGAVAGFKLLWVLLLATIVGLLLQRLAARLGVVTGLHLAEVCHRQYPKVPRIVLWLMVETAIIGSDMQEVIGSAIAINLLSAGKIPLWGGVLITIADTFVFLFLDKYGLRKLEAFFGFLITIMALTFGYEYVTVKPNQAQVLRGLFVPSCSGCSTPQVEQAVGIVGAVIMPHNMYLHSALVKSRQVNRANKKEVREANKYFFIESCIALFVSFIINVFVVSVFAEAFFGKSNKQVGEVCRNSSSNYTHLFPDDNSTLTVDIYKGGIVLGCYFGPAALYIWAVGILAAGQSSTMTGTYSGQFVME…
AAA79219.1	GMEEYSCFSFRKLWAFTGPGFLMTIAYLDPGNIESDLQSGAVAGFKLLWILLLATLVGLLLQRLAAKLGVVTGLHLAEVCHRQYPKVPRVILWLMVELAIIGSDMQEVIGSAIAINLLSVGRIPLWGGVLITIADTFVFLFLDKYGLRKLEAFFGFLITIMALTFGYEYVTVKPSQSQVLKGMFVPSCSGCRTPQIEQAVGIVGAVIMPHNMYLHSALVKSRQVNRNNKQEVREANKYFFIESCIALFVSFIINVFVVSVFAEAFFGKTNEQVVEVCTNTSSPHAGLFPKDNSTLAVDIYKGGVVLGCYFGPAALYIWAVGILAAGQSSTMTGTYSGQFVMEGFLNLKWSRFARVVLTRSIAIIPTLLVAVFQDVEHLTGMNDFLNVLQSLQLPFALIP…
XP_023612134.1	MKKQRKTEAAPQCELKSYSKNTMVLGPEQKMPDGAASEDYGDSASLGAINPAYSSSSLPQSPGTSGEPFTTYFDEKIPIPEEEHSCFSFRKLWAFTGPGFLMSIAYLDPGNIESDLQSGAVAGFKLLWVLLLATIVGLLLQRLAARLGVVTGLHLAEVCYRQYPKVPRIILWLMVELAIIGSDMQEVIGSAIAINLLSVGRVPLWGGVLITIADTFVFLFLDKYGLRKLEAFFGFLITVMALTFGYEYITVRPNQSEVLKGMFLPSCSGCGTPQIQQAVGIVGAVIMPHNMYLHSALVKSRQVNRAKKQEVREANKYFFIESCIALFVSFIINVFVVSVFAEAFFEKTNQQVIEVCKNSSSPHTGLIPDDNSTLAVDIFKGGIVLGCYFGPAALYIWAV…
AAH97338.1	MVLDPEEKIPDDGASGDHGDSASLGAINPAYSNSSLPHSTGDSEEPFTTYFDEKIPIPEEEYSCFSFRKLWAFTGPGFLMSIAYLDPGNIESDLQSGAVAGFKLLWVLLLATIVGLLLQRLAARLGVVTGLHLAEVCHRQYPKVPRIILWLMVELAIIGSDMQEVIGSAIAINLLSAGRVPLYGGVLITIADTFVFLFLDKYGLRKLEAFFGFLITIMALTFGYEYVTVKPSQSQVLRGMFVPSCSGCHTPQVEQAVGIVGAVIMPHNMYLHSALVKSRQVNRANKQEVREANKYFFIESCIALFVSFIINVFVVSVFAEAFFEKTNEQVVEVCRNSSSPHADLFPNDNSTLAVDIYKGGVVLGCYFGPAALYIWAVGILAAGQSSTMTGTYSGQFVME…
XP_008949497.1	MSIAYLDPGNIESDLQSGAVAGFKLLWILLLATLVGLLLQRLAARLGVVTGLHLAEVCHRQYPKVPRVILWLMVELAIIGSDMQEVIGSAIAINLLSVGRIPLWGGVLITIADTFVFLFLDKYGLRKLEAFFGFLITIMALTFGYEYVTVKPSQSQVLKGMFVPSCSGCRTPQIEQAVGIVGAVIMPHNMYLHSALVKSRQVNRNNKQEVREANKYFFIESCIALFVSFIINVFVVSVFAEAFFGKTNEQVVEVCTNTSSPHAGLFPKDNSTLAVDIYKGGVVLGCYFGPAALYIWAVGILAAGQSSTMTGTYSGQFVMEGFLNLKWSRFARVVLTRSIAIIPTLLVAVFQDVEHLTGMNDFLNVLQSLQLPFALIPILTFTSLRPVMSDFANGLGWRI…
XP_023412091.1	MSIAYLDPGNIESDLQSGAVAGFKLLWVLLLATIVGLLLQRLAARLGVVTGLHLAEVCHQQYPKVPRIILWLMVELAIIGSDMQEVIGSAIAINLLSVGRVPLWGGVLITIADTFVFLFLDKYGLRKLEAFFGFLITVMAITFGYEYVTVKPDQRQVLRGMFVPSCSGCTTPQVEQAVGIVGAVIMPHNMYLHSALVKSRQVNRAKKHEVQEANKYFFIESCIALFVSFVINVFVVSVFAEAFFEKTNEQVVQVCKNTSIPWTGLFPDDNSTLTVDIYKGGVVLGCYFGPAALYIWAVGILAAGQSSTMTGTYSGQFVMEGFLNLKWSRFARVILTRSIAIIPTLLVSVFQDVEHLTGMNDFLNVLQSLQLPFALIPILTFTSLRPVMSDFANGIGWRI…
XP_004453733.1	MSIAYLDPGNIESDLQSGAVAGFKLLWVLLLATIVGLLLQRLAARLGVVTGLHLAEVCHRQYPKVPRIILWLMVELAIIGSDMQEVIGSAIAINLLSVGRVPLWGGVLITIADTFVFLFLDKYGLRKLEAFFGFLITIMALTFGYEYVTVKPDQSQVLKGMFVPSCSGCHTPQVEQAVGIVGAVIMPHNMYLHSALVKSRQVNRANKQEVREANKYFFIESCIALFVSFIINVFVVSVFAEAFFERRNEQVVAVCRNGSSPHADLFPDDNSTLTVDIYKGGVVLGCYFGPAALYIWAVGILAAGQSSTMTGTYSGQFVMEGFLNLKWSRFARVILTRSIAIIPTLLVAVFQDVEHLTGMNDFLNVLQSLQLPFALIPILTFTSLRPVMSDFANGIGWRI…
XP_029403954.1	MSIAYLDPGNIESDLQSGAVAGFKLLWVLLLATIVGLLLQRLAARLGVVTGLHLAEVCHRQYPKVPRIILWLMVELAIIGSDMQEVIGSAIAINLLSAGRVPLWGGVLITIADTFVFLFLDKYGLRKLEAFFGFLITIMALTFGYEYITVKPSQSQVLRGMFVPSCPGCRTPQVEQAVGIVGAVIMPHNMYLHSALVKSRQVNRANKQEVREANKYFFIESCIALFVSFIINVFVVSVFAEAFFEKTNQQVVEVCKNNSSPHSDLFPNDNSTLAVDIYKGGVVLGCYFGPAALYIWAVGILAAGQSSTMTGTYSGQFVMEGFLNLKWSRFARVILTRSIAIIPTLLVAVFQDVEHLTGMNDFLNVLQSLQLPFALIPILTFTSLRPVMSEFSNGIGWRI…
XP_006520642.1	MSIAYLDPGNIESDLQSGAVAGFKLLWVLLLATIVGLLLQRLAARLGVVTGLHLAEVCHRQYPKVPRIILWLMVELAIIGSDMQEVIGSAIAINLLSAGRVPLWGGVLITIADTFVFLFLDKYGLRKLEAFFGFLITIMALTFGYEYITVKPSQSQVLRGMFVPSCPGCRTPQVEQAVGIVGAVIMPHNMYLHSALVKSRQVNRANKQEVREANKYFFIESCIALFVSFIINVFVVSVFAEAFFEKTNKQVVEVCKNNSSPHADLFPSDNSTLAVDIYKGGVVLGCYFGPAALYIWAVGILAAGQSSTMTGTYSGQFVMEGFLNLKWSRFARVILTRSIAIIPTLLVAVFQDVEHLTGMNDFLNVLQSLQLPFALIPILTFTSLRPVMSEFSNGIGWRI…
XP_004388383.2	MRGCGSVGQSRECRELADLALAPGKWSCRRGGSLLGGCGAESYSKDTGTPVSIMVLGAEQKMPDDNASGDHGDTASLGAINPAYSNSSLTQSTGHSEEPFTTYFDEKIAIPEVEYSCFSFRKLWAFTGPGFLMSIAYLDPGNIESDLQSGAVAGFKLLWVLLLATIVGLLLQRLAARLGVVTGLHLAEVCHRQYPKVPRIILWLMVELAIIGSDMQEVIGSAIAINLLSVGRVPLWGGVLITIADTFVFLFLDKYGLRKLEAFFGFLITIMALTFGYEYVTVKPSQSQVLKGMFVPTCSGCDTQQIEQAVGIVGAVIMPHNMYLHSALVKSRQINRANKREVQEANKYFFIESCIALFVSFIINVFVVSVFAEAFFGKTNEQVVQVCKNTSIAWTGLFP…
XP_004388384.1	MSKDDSLNNASGDHGDTASLGAINPAYSNSSLTQSTGHSEEPFTTYFDEKIAIPEVEYSCFSFRKLWAFTGPGFLMSIAYLDPGNIESDLQSGAVAGFKLLWVLLLATIVGLLLQRLAARLGVVTGLHLAEVCHRQYPKVPRIILWLMVELAIIGSDMQEVIGSAIAINLLSVGRVPLWGGVLITIADTFVFLFLDKYGLRKLEAFFGFLITIMALTFGYEYVTVKPSQSQVLKGMFVPTCSGCDTQQIEQAVGIVGAVIMPHNMYLHSALVKSRQINRANKREVQEANKYFFIESCIALFVSFIINVFVVSVFAEAFFGKTNEQVVQVCKNTSIAWTGLFPDNNSTLTVDIYKGGIVLGCYFGPAALYIWAVGILAAGQSSTMTGTYSGQFVMEGFLN…
XP_023598176.1	MRGCGSVGQSRECRELADLALAPGKWSCRRGGSLLGGCGAESYSKDTGTPVSIMVLGAEQKMPDDNASGDHGDTASLGAINPAYSNSSLTQSTGHSEEPFTTYFDEKIAIPEVEYSCFSFRKLWAFTGPGFLMSIAYLDPGNIESDLQSGAVAGFKLLWVLLLATIVGLLLQRLAARLGVVTGLHLAEVCHRQYPKVPRIILWLMVELAIIGSDMQEVIGSAIAINLLSVGRVPLWGGVLITIADTFVFLFLDKYGLRKLEAFFGFLITIMALTFGYEYVTVKPSQSQVLKGMFVPTCSGCDTQQIEQAVGIVGAVIMPHNMYLHSALVKSRQINRANKREVQEANKYFFIESCIALFVSFIINVFVVSVFAEAFFGKTNEQVVQVCKNTSIAWTGLFP…
XP_012505599.1	PQSTKHSEEPFATYFDEKVSIPEEEYSCFSFRKLWAFTGPGFLMSIGFLDPGNIEADLQSGAVAGFQLLWVLLLATIVGLLLQRLAVRLGVVTGLHLAEVCHHRYPKVPRIILWLMVELAIIGSDMQEVIGSAIAINLLSLGRIPLWGGVLITIADTFVFLFLDKYGLRKLEAFFGFLITVMALTFGYEYVTVKPSQSQVLKGMFVPSCSGCHTPQIEQAVGIVGAVIMPHNVYLHSALVKSRQVNRNNKQEVREANKYFFIESCIAVFVSLIINVFVMSVFAEAFFEKTNKQVVEVCKNSSSPHAGLFPNDNFTLAVDIYKGGIVLGCYFGPAALYIWAVGILAAGQSSTMTGTYSGQFVMETLILLYIFVQGFLNLKWSRFARVILTRSIAIIPTLL…
XP_006870107.1	MVLGTDQKLPDDDASGEHGDTASLGAINPAYSHSSLPRSTEQSQDPFTTYFDEKIAIPDEEYSCFSFRKLWAFTGPGFLMSIAYLDPGNIESDLQSGAVAGFKLLWVLLLATIVGLLLQRLAARLGVVTGLHLAEVCHKQYPKVPRIILWLMVELAIIGSDMQEVIGSAIAINLLSVGRVPLWAGVLITIADTFVFLFLDKYGLRKLEAFFGFLITIMALTFGYEYITVKPSQSQVLKGLFVPSCSGCNISQVMQAVGIVGAVIMPHNMYLHSALVKSRQVNRANKQEVREANKYFFIESCIALFVSFIINVFVVSVFAEAFFERTNDQVVQVCKNSSFPMSNDLFPDDNSTLLVDIYKGGVVLGCYFGPAALYIWAVGILAAGQSSTMTGTYSGQFVM…
PNI33204.1	MSIAYLDPGNIESDLQSGAVAGFKLLWILLLATLVGLLLQRLAARLGVVTGLHLAEVCHRQYPKVPRVILWLMVELAIIGSDMQEVIGSAIAINLLSVGRIPLWGGVLITIADTFVFLFLDKYGLRKLEAFFGFLITIMALTFGYEYVTVKPSQSQVLKGMFVPSCSGCRTPQIEQAVGIVGAVIMPHNMYLHSALVKSRQVNRNNKQEVREANKYFFIESCIALFVSFIINVFVVSVFAEAFFGKTNEQVVEVCTNTSSPHAGLFPKDNSTLAVDIYKGGVVLGCYFGPAALYIWAVGILAAGQSSTMTGTYSGQFVMEGFLNLKWSRFARVVLTRSIAIIPTLLVAVFQDVEHLTGMNDFLNVLQSLQLPFALIPILTFTSLRPVMSDFANGLGWRI…
PNJ25632.1	MSIAYLDPGNIESDLQSGAVAGFKLLWILLLATLVGLLLQRLAARLGVVTGLHLAEVCHRQYPKVPRVILWLMVELAIIGSDMQEVIGSAIAINLLSVGRVPLWGGVLITIADTFVFLFLDKYGLRKLEAFFGFLITIMALTFGYEYVTVKPSQSQVLKGMFVPSCSGCRTPQIEQAVGIVGAVIMPHNMYLHSALVKSRQVNRNNKQEVREANKYFFIESCIALFVSFIINVFVVSVFAEAFFGKTNEQVVEVCTNTSSPHAGLFPKDNSTLAVDIYKGGVVLGCYFGPAALYIWAVGILAAGQSSTMTGTYSGQFVMEGFLNLKWSRFARVVLTRSIAIIPTLLVAVFQDVEHLTGMNDFLNVLQSLQLPFALIPILTFTSLRPVMSDFANGLGWRI…
XP_007452369.1	MSIAYLDPGNIESDLQSGAVAGFKLLWVLLMATIVGLLLQRLAARLGVVTGLHLAEVCHRQYPRVPRIILWLMVELAIVGSDMQEVIGSAIAINLLSVGRVPLWGGVLITIADTFVFLFLDKYGLRKLEAFFGFLITIMALTFGYEYVTVKPSQTQVLKGMFLPSCSGCHTPQIEQAVGIVGAVIMPHNMYLHSALVKSRQVDRANKEEVREANKYFFIESCIALFVSFIINVFVVSVFAEAFFEKTNEQVVEVCRNSSSPHTHLFPDDNSTLAVDIYKGGVVLGCYFGPAALYIWAVGILAAGQSSTMTGTYSGQFVMEGFLNLKWSRFARVILTRSIAIIPTLLVAVFQDVEHLTGMNDFLNVLQSLQLPFALIPILTFTSLRPVMSEFANGIGWRI…
XP_030104241.1	MSIAYLDPGNIESDLQSGAVAGFKLLWVLLLATIVGLLLQRLAARLGVVTGLHLAEVCHRQYPKVPRIILWLMVELAIIGSDMQEVIGSAIAINLLSAGRVPLWGGVLITIADTFVFLFLDKYGLRKLEAFFGFLITIMALTFGYEYITVKPSQSQVLRGMFVPSCPGCRTPQVEQAVGIVGAVIMPHNMYLHSALVKSRQVNRANKQEVREANKYFFIESCIALFVSFIINVFVVSVFAEAFFEKTNKQVVEVCKNNSSPHADLFPSDNSTLAVDIYKGGVVLGCYFGPAALYIWAVGILAAGQSSTMTGTYSGQFVMEGFLNLKWSRFARVILTRSIAIIPTLLVAVFQDVEHLTGMNDFLNVLQSLQLPFALIPILTFTSLRPVMSEFSNGIGWRI…
XP_012417966.1	MSIAYLDPGNIESDLQSGAVAGFKLLWVLLLATVVGLLLQRLAARLGVVTGLHLAEVCHRQYPKVPRIILWLMVELAIIGSDMQEVIGSAIAINLLSVGRVPLWGGVLITIADTFVFLFLDKYGLRKLEAFFGFLITIMALTFGYEYITVKPSQSQVLKGMFLPSCSGCHTPQVEQAVGIVGAVIMPHNMYLHSALVKSRQVNRANKQEVREANKYFFIESCIALFVSFIINVFVVSVFAEAFFEKTNDQVIAVCRNNSSPHTHLFPDDNSTLAVDIYKGGVVLGCYFGPAALYIWAVGILAAGQSSTMTGTYSGQFVMEGFLNLKWSRFARVILTRSIAIIPTLLVAVFQDVEHLTGMNDFLNVLQSLQLPFALIPILTFTSLRPVMNDFANGIGWRI…
XP_004711436.1	MGPEPKILKDDVSGDHGDTASLDAISPTYSNSPLSQSTGNSADPFTTYFDEKIAIPEEEYSCFSFRKLWAFTGPGFLMSIAYLDPGNIESDLQSGAVAGFKLLWVLLLATLVGLLLQRLAARLGVVTGLHLAEVCHRQYPKVPRIILWLMVELAIIGSDMQEVIGSAIAINLLSVGRVPLWGGVLITIADTFVFLFLDKYGLRKLEAFFGFLITIMALTFGYEYVTVKPNQTQVLKGMFVPSCSGCHIPQVEQAVGIVGAVIMPHNMYLHSALVKSRQINRASKQEVREANKYFFIESCIALFVSFVINVFVVSVFAEAFFGKTNEQVVQVCKNTTIPMPENLFPDDNSTLAVDIYKGGVVLGCYFGHAALYIWAVGILAAGQSSTMTGTYSGQFVMEG…
XP_004711438.1	MSIAYLDPGNIESDLQSGAVAGFKLLWVLLLATLVGLLLQRLAARLGVVTGLHLAEVCHRQYPKVPRIILWLMVELAIIGSDMQEVIGSAIAINLLSVGRVPLWGGVLITIADTFVFLFLDKYGLRKLEAFFGFLITIMALTFGYEYVTVKPNQTQVLKGMFVPSCSGCHIPQVEQAVGIVGAVIMPHNMYLHSALVKSRQINRASKQEVREANKYFFIESCIALFVSFVINVFVVSVFAEAFFGKTNEQVVQVCKNTTIPMPENLFPDDNSTLAVDIYKGGVVLGCYFGHAALYIWAVGILAAGQSSTMTGTYSGQFVMEGFLNLKWSRFARVILTRSIAIIPTLLVAVFQDVEHLTGMNDFLNVLQSLQLPFALIPVLTFTSLRPVMHDFANGLGWR…
XP_024848121.1	MKNQLKEEAVPHCELKSYSVNSGTQVSTTVLGPEQKMPDESASGDHGVSVSLGAINPARSNSSIPQSPEVYTEEPFTTYFDEKIAVPEEKHSCFSFRKLWAFTGPGFLMSIVDPGNIECDLQSGALAGFKLLWVVLFSTIMGLLLQSLAARLGVVTGLHLAEVCHRQYPRVPRILLWLMVELAIIGVDMQEVIGSAIAINLLSVGRIPLWGGVLITIADTLIFLFLDKYGLRKLEAFFGFLITIMALTFGYEYVTVKPSQTQVLQGMFLPSCSGCRTPQIIQAVAIVGAVITPHNIYLHSALVKSRQVDRANKQEVREANKYFFIDSCIALFVSFIINIFVISVFAEAFFEKTNKQVVAVCKNSSSAHAHLFPDDNSTLTVDIYKGGVVLGCYFGPAAL…
XP_019815354.1	MKNQLKEEAVPHCELKSYSVNSGTQVSTTVLGPEQKMPDESASGDHGVSVSLGAINPARSNSSIPQSPEVYTEEPFTTYFDEKIAVPEEKHSCFSFRKLWAFTGPGFLMSIVDPGNIECDLQSGALAGFKLLWVVLFSTIMGLLLQSLAARLGVVTGLHLAEVCHRQYPRVPRILLWLMVELAIIGVDMQEVIGSAIAINLLSVGRIPLWGGVLITIADTLIFLFLDKXGLRKLEAFFGFLITIMALTFGYEYVTVKPSQTQVLQGMFLPSCSGCRTPQIIQAVAIVGAVITPHNIYLHSALVKSRQVDRANKQEVXEANKYFFIDSCIALFVSFIINIFVISVFAEAFFEKTNKQVVAVCKNSSSAHAHLFPDDNSTLTVDIYKGGVVLGCYFGPAAL…
XP_027398650.1	MKNQLKEEAVPHCELKSYSVNSGTQVSTTVLGPEQKMPDESASGDHGVSVSLGAINPARSNSSIPQSPEVYTEEPFTTYFDEKIAVPEEKHSCFSFRKLWAFTGPGFLMSIVDPGNIECDLQSGALAGFKLLWVVLFSTIMGLLLQSLAARLGVVTGLHLAEVCHRQYPRVPRILLWLMVELAIIGVDMQEVIGSAIAINLLSVGRIPLWGGVLITIADTLIFLFLDKYGLRKLEAFFGFLITIMALTFGYEYVTVKPSQTQVLQGMFLPSCSGCRTPQIIQAVAIVGAVITPHNIYLHSALVKSRQVDRANKQEVQEANKYFFIDSCIALFVSFIINIFVISVFAEAFFEKTNKQVVAVCKNSSSAHAHLFPDDNSTLTVDIYKGGVVLGCYFGPAAL…
ELR59049.1	MKNQLKEEAVPHCELKSYSVNSGTQVSTTVLGPEQKMPDENASGDHGVSVSLGAINPARSNSSIPQSPEVYTEEPFTTYFDEKIAVPEEKHSCFSFRKLWAFTGPGFLMSIVDPGNIECDLQSGALAGFKLLWVVLFSTIMGLLLQSLAARLGVVTGLHLAEVCHRQYPRVPRILLWLMVELAIIGVDMQEVIGSAIAINLLSVGRIPLWGGVLITIADTLIFLFLDKYGLRKLEAFFGFLITIMALTFGYEAMKPSQTQVLQGMFLPSCSGCRTPQIIQAVAIVGAVITPHNIYLHSALVKSRQVDRANKQEVQEANKYFFIDSCIALFVSFIINIFVISVFAEAFFEKTNKQVVAVCKNSSSAHAHLFPDDNSTLTVDIYKGGVVLGCYFGPAALYI…
DAA29960.1	MKNQLKEEAVPHCELKSYSVNSGTQVSTTVLGPEQKMPDESASGDHGVSVSLGAINPARSNSSIPQSPEVYTEEPFTTYFDEKIAVPEEKHSCFSFRKLWAFTGPGFLMSIVDPGNIECDLQSGALAGFKLLWVVLFSTIMGMLLQSLAARLGVVTGLHLAEVCHRQYPRVPRILLWLMVELAIIGVDMQEVIGSAIAINLLSVGRIPLWGGVLITIADTLIFLFLDKYGLRKLEAFFGFLITIMALTFGYEYVTVKPSQTQVLQGMFLPSCSGCRTPQIIQAVAIVGAVITPHNIYLHSALVKSRQVDRANKQEVREANKYFFIDSCIALFVSFIINIFVISVFAEAFFEKTNKQVVAVCKNSSSAHAHLFPDDNSTLTVDIYKGGVVLGCYFGPAAL…
KAA0734891.1	MLSGQMCKSHLESYSVNSGTQVSTTVLGPEQKMPDENASGDHGVSVSLGAINPARSNSSIPQSPEVYTEEPFTTYFDEKIAVPEEKHSCFSFRKLWAFTGPGFLMSIVDPGNIECDLQSGALAGFKLLWVVLFSTIMGLLLQSLAARLGVVTGLHLAEVCHRQYPRVPRILLWLMVELAIIGVDMQEVIGSAIAINLLSVGRIPLWGGVLITIADTLIFLFLDKYGLRKLEAFFGFLITIMALTFGYEAMKPSQTQVLQGMFLPSCSGCRTPQIIQAVAIVGAVITPHNIYLHSALVKSRQVDRANKQEVQEANKYFFIDSCIALFVSFIINIFVISVFAEAFFEKTNKQVVAVCKNSSSAHAHLFPDDNSTLTVDIYKGGVVLGCYFGPAALYIWAVG…
XP_010856127.1	MPDENTSGDHGVSVSLGAINPARSNSSIPQSPEVYTEEPFTTYFDEKIAVPEEKHSCFSFRKLWAFTGPGFLMSIVDPGNIECDLQSGALAGFKLLWVVLFSTIMGLLLQSLAARLGVVTGLHLAEVCHHQYPRVPRILLWLMVELAIIGVDMQEVIGSAIAINLLSVGRIPLWGGVLITIADTLIFLFLDKYGLRKLEAFFGFLITIMALTFGYEYVTVKPSQTQVLQGMFLPSCSGCRTPQIIQAVAIVGAVITPHNIYLHSALVKSRQVDRANKQEVQEANKYFFIDSCIALFVSFIINIFVISVFAEAFFEKTNKQVVAVCKNSSSAHAHLFPDDNSTLTVDIYKGGVVLGCYFGPAALYIWAVGILAAGHSSTMTGTYSGQFVMEGFLNLKWSR…
XP_014332562.1	MPDENASGDHGVSVSLGAINPARSNSSIPQSPEVYTEEPFTTYFDEKIAVPEEKHSCFSFRKLWAFTGPGFLMSIVDPGNIECDLQSGALAGFKLLWVVLFSTIMGLLLQSLAARLGVVTGLHLAEVCHRQYPRVPRILLWLMVELAIIGVDMQEVIGSAIAINLLSVGRIPLWGGVLITIADTLIFLFLDKYGLRKLEAFFGFLITIMALTFGYEYVTVKPSQTQVLQGMFLPSCSGCRTPQIIQAVAIVGAVITPHNIYLHSALVKSRQVDRANKQEVQEANKYFFIDSCIALFVSFIINIFVISVFAEAFFEKTNKQVVAVCKNSSSAHAHLFPDDNSTLTVDIYKGGVVLGCYFGPAALYIWAVGILAAGHSSTMTGTYSGQFVMEGFLNLKWSR…
XP_020725740.1	MKKQLKEEAASHCELKSYSMNSGTQVSTTVLGPEQKMPDENASGDHGVSVSLGAINPACSNSSIRQSPGAHTEEPFTTYFDEKIAIPEEKPSCFSFRKLWAFTGPGFLMSIVDPGNIECDLQSGALAGFKLLWVVLFSTIMGLLLQSLAARLGVVTGLHLAEVCHRQYPRVPRILLWLMVELAIIGVDMQEVIGSAIAINLLSVGRIPLWGGVLITIADTLLFLFLDKYGLRKLEAFFGFLITIMALTFGYEYVTVKPSQTQVLQGMFLPSCSGCRTPQIIQAVAIMGAVITPHNIYLHSALVKSRQVDRADKQKVQEANKYFFIDSCIALFVSLIINIFVISVFAEAFFEKTNQQVVAVCKNSSSAHTHLFPEDNSTLTVDIYKGGVVLGCYFGPAAL…
XP_027821738.1	MEAGQSPNAVAEARHVNRQGGEGNSGASGERKYREHPCEAGVRLSSESYSVNSGTQVSTTVLGPEQKMPDENASGDHGVSVSLGAIKPACSNSSIPQSFRVHTEEPFTTYFDEKIAVPEEKHSCLSFRKLWAFTGPGFLMSIVDPGNIECDLQSGAVAGFKLLWVVLFSTIVGLLLQSLAARLGVVTGLHLAEVCHRQYPKVPRILLWLMVELAIIGVDMQEVIGSAIAINLLSAGRIPLWGGVLITIADTLIFLFLDKYGLRKLEAFFGFLITIMALTFGYEYVTVKPSQTQVLQGMFLPSCSGCRTPQIMQAVAIVGAVITPHNIYLHSALVKSRQVDRASKQEVREANKYFFIDSCIALFVSFIINIFVISVFAEAFFEKTNQQVVAVCKNSSSAH…
KAB0379148.1	MDCIVHGIAKSQTRLSDFHKNASGDHGVSVSLGAINPACSNSSIPQSPGAHTEKPFTTYFDEKIAIPEEKPSCFSFRKLWAFTGPGFLMSIVDPGNIECDLQSGALAGFKLLWVVLFSTIMGLLLQSLAARLGVVTGLHLAEVCHRQYPRVPRILLWLMVELAIIGVDMQEVIGSAIAINLLSVGRIPLWGGVLITIADTLLFLFLDKYGLRKLEAFFGFLITIMALTFGYEYVTVKPSQTQVLQGMFLPSCSGCRTPQIIQAVAIMGAVITPHNIYLHSALVKSRQVDRANKQEVQEANKYFFIDSCIALFVSLIINIFVISVFAEAFFEKTNQQVVAVCKNSSSAHTHLFPDDNSTLTVDIYKGGVVLGCYFGPAALYIWAVGILAAGQSSTMTGTY…
KAB0361076.1	MDCIVHGIAKSQTRLSDFHKNASGGHGVSVSLGAINPACSNSSIPQSPGAHTEKPFTTYFDEKIAIPEEKPSCFSFRKLWAFTGPGFLMSIVDPGNIECDLQSGALAGFKLLWVVLFSTIMGLLLQSLAARLGVVTGLHLAEVCHRQYPRVPRILLWLMVELAIIGVDMQEVIGSAIAINLLSVGRIPLWGGVLITIADTLLFLFLDKYGLRKLEAFFGFLITIMALTFGYEYVTVKPSQTQVLQGMFLPSCSGCRTPQIIQAVAIMGAVITPHNIYLHSALVKSRQVDRANKQEVQEANKYFFIDSCIALFVSLIINIFVISVFAEAFFEKTNQQVVAVCKNSSSAHTHLFPDDNSTLTVDIYKGGVVLGCYFGPAALYIWAVGILAAGQSSTMTGTY…
XP_025138194.1	MVLGPEQKIPDEDASGDHGDSASLGAINPAYSNSSIPQSPGAGSEDPFTTYFDEKIAIPEEEYSCFSFRKLWAFTGPGFLMSIAYLDPGNIESDLQSGAVAGFKLLWILLLATTVGLLLQRLAARLGVVTGLHLAEVCHRQYPRVPRIILWLMVELAIIGSDMQEVIGSAIAINLLSVGRIPLWGGVLITIADTFVFLFLDKYGLRKLEAFFGFLITIMALTFGYEYVTVKPSQTQVLKGMFLPSCSGCRTPQIEQAVGIVGAVIMPHNMYLHSALVKSRQVDRANKQEVREANKYFFIESCIALFVSFIINVFVVSVFAEAFFGKTNEQVVAVCKNSSSPHAHLFPDDNSTLAVDIYKGGVVLGCYFGPAALYIWAVGILAAGQSSTMTGTYSGQFVM…
EGW10510.1	MVLDPEEKMPDDGASGDHGDSASLSTINPAYSISSLPQSTGDSEEPFTTYFDEKIPIPEEEYSCFSFRKLWAFTGPGFLMSIAYLDPGNIESDLQSGAVAGFKLLWVLLLATIVGLLLQRLAARLGVVTGLHLAEVCHRQYPKVPRIILWLMVELAIIGSDMQEVIGSAIAINLLSAGRVPLWGGVLITIADTFVFLFLDKYGLRKLEAFFGFLITIMALTFGYEYVTVKPSQSQVLRGMFVPSCSGCSTPQVEQAVGIVGAVIMPHNMYLHSALVKSRQVNRANKQEVREANKYFFIESCIALFVSFIINVFVVSVFAEAFFGKTNEQVVNVCRNSSSPHTDLFPNDNSTLAVDIYKGGVVLGCYFGPATLYIWAVGILAAGQSSTMTGTYSGQFVME…
XP_012781767.1	MKEKQRNAEAAPACELKSYSKNSDTQVPTMVLGPEQNMPDDNASGDHGDSASLGVINAAYSHSSLPQSTAEAGEPFSTYFDEKIPIPEEQPSCFSFRKLWAFTGPGFLMSIAYLDPGNIESDLQSGAVAGFKLLWVLLLATIAGLLLQRLAARLGVVTGLHLAEVCHRHYPKVPRIILWLMVELAIIGSDMQEVIGSAIAINLLSIGRVPLWGGVLITIADTFVFLFLDKYGLRKLEAFFGFLITLMALTFGYEYVTVRPNQSQVLRGMFIPSCSGCRTPQIEQAVGIVGAVIMPHNMYLHSALVKSRQVNRASKQEVREANKYFFIESCVALFVSFIINVFVVSVFAEAFFEKTNEQVVDVCRNSSSPYSGLFPEDNSTLAVDIYKGGVVLGCYFGPA…
OWK16662.1	MVLGPEQKIPDEDASGDHGDSASLGAINPAYSNSSIPQSPGAGSADPFTTYFDEKIAIPEEELLWVLLLATIVGLLLQRLAARLGVVTGLHLAEVCHRQYPRVPRIILWLMVELAIIGSDMQEVIGSAIAINLLSLGRVPLWGGVLITIADTFVFLFLDKYVKPSQTQVLKGMFLPSCSGCRTPQIEQAVGIVGAVIMPHNMYLHSALVKVDRANKQEVREANKYFFIESCIALFVSFIINVFVVSVFAEAFFGKTNEQVVAVCKNSSSPHTHLFPEDNSTLAVDIYKGGVVLGCYFGPAALYIWAVGILAAGQSSTMTGTYSGQFVMEGFLNLKWSRFARVILTRSIAIIPTLLVAVFQDVEHLTGMNDFLNVLQSLQLPFALIPILTFTSLRPVMSE…
XP_023612135.1	MKKQRKTEAAPQCELKSYSKNTMVLGPEQKMPDGAASEDYGDSASLGAINPAYSSSSLPQSPGTSGEPFTTYFDEKIPIPEEEHSCFSFRKLWAFTGPGFLMSIAYLDPGNIESDLQSGAVAGFKLLWVLLLATIVGLLLQRLAARLGVVTGLHLAEVCYRQYPKVPRIILWLMVELAIIGSDMQEVIGSAIAINLLSVGRVPLWGGVLITIADTFVFLFLDKYGLRKLEAFFGFLITVMALTFGYEYITVRPNQSEVLKGMFLPSCSGCGTPQIQQAVGIVGAVIMPHNMYLHSALVKSRQVNRAKKQEVREANKYFFIESCIALFVSFIINVFVVSVFAEAFFEKTNQQVIEVCKNSSSPHTGLIPDDNSTLAVDIFKGGIVLGCYFGPAALYIWAV…
XP_004711437.1	MSIAYLDPGNIESDLQSGAVAGFKLLWVLLLATLVGLLLQRLAARLGVVTGLHLAEVCHRQYPKVPRIILWLMVELAIIGSDMQEVIGSAIAINLLSVGRVPLWGGVLITIADTFVFLFLDKYGLRKLEAFFGFLITIMALTFGYEYVTVKPNQTQVLKGMFVPSCSGCHIPQVEQAVGIVGAVIMPHNMYLHSALVKSRQINRASKQEVREANKYFFIESCIALFVSFVINVFVVSVFAEAFFGKTNEQVVQVCKNTTIPMPENLFPDDNSTLAVDIYKGGVVLGCYFGHAALYIWAVGILAAGQSSTMTGTYSGQFVMEGFLNLKWSRFARVILTRSIAIIPTLLVAVFQDVEHLTGMNDFLNVLQSLQLPFALIPVLTFTSLRPVMHDFANGLGWR…
XP_012803701.1	MYVNNSKKTLGVPRDCAVIGIQYSCFSFRKLWAFTGPGFLMSIAYLDPGNIESDLQSGAVAGFKLLWILLFATIVGLLLQRLAARLGVVTGLHLAEVCHRQYPKVPRIILWLMVELAIIGSDMQEVIGSAIAINLLSVGRVPLWGGVLITIADTFVFLFLDKYGLRKLEAFFGFLITIMALTFGYEYVTVKPDQSQVLRGMFVPSCSGCGTPQIEQAVGIVGAVIMPHNMYLHSALVKSRQVNRANKQEVREANKYFFIESCIALFVSFIINVFVVSVFAEAFYGKTNEQVVSKLGSHSSPRSNLFPPDTVYLSVPCLPXGVVLGCYFGPAALYIWAVGILAAGQSSTMTGTYSGQFVMEGFLNLKWSRFARVILTRSIAIIPTLLVAVFQDVEHLTGM…
XP_010803269.1	MKKQSKKEAAPHCELKSCSKNSDTQVSSIVLGPASSVQIPVPDEDAFGDHGDSASLGALNPAYSNSSIPQSSGGLSEEHFTTYLDENNAVLEEKHSCFSFRKLWVFTGPGLLMSVVDPGNIECDLQSGALAGFKLLWVLLLATIVGVLLQTLAARLGVVTGLHLAEVCYRQYPRVPRILLWLMVELAIIGVDMQEVIGSAIAINLLSAGRIPLWGGVLITIADTFAFLFLDNYGLRKLEAFFGFIFTVMALTFGYEYVTVKPSQTQVLKGMFLPSCSGCRTPQIMQAVAIVGAIIMPHNIYLHSALVKSRHIDRAKRQEVREANKYFFIDCCIALFVSFIINTCVISVFAEAFFEKTNEQVVAVCKNSSSPHTHLFPDDNSTLAVDIYKGGVVLGCYFG…
XP_010803268.1	MKKQSKKEAAPHCELKSCSKNSDTQVSSIVLGPASSVQIPVPDEDAFGDHGDSASLGALNPAYSNSSIPQSSGGLSEEHFTTYLDENNAVLEEKHSCFSFRKLWVFTGPGLLMSVVDPGNIECDLQSGALAGFKLLWVLLLATIVGVLLQTLAARLGVVTGLHLAEVCYRQYPRVPRILLWLMVELAIIGVDMQEVIGSAIAINLLSAGRIPLWGGVLITIADTFAFLFLDNYGLRKLEAFFGFIFTVMALTFGYEYVTVKPSQTQVLKGMFLPSCSGCRTPQIMQAVAIVGAIIMPHNIYLHSALVKSRHIDRAKRQEVREANKYFFIDCCIALFVSFIINTCVISVFAEAFFEKTNEQVVAVCKNSSSPHTHLFPDDNSTLAVDIYKGGVVLGCYFG…
XP_019816132.1	MKKQSKKEAAPHCELKSCSKNSDTQVSSIVLGPASSVQIPVPDEDAFGDHGDSASLGALNPAYSNSSIPQSSGGLSEEHFTTYLDENNAVLEEKHSCFSFRKLWVFTGPGLLMSVVDPGNIECDLQSGALAGFKLLWVLLLATIVGVLLQTLAARLGVVTGLHLAEVCYRQYPRVPRILLWLMVELAIIGVDMQEVIGSAIAINLLSAGRIPLWGGVLITIADTFAFLFLDNYGLRKLEAFFGFIFTVMALTFGYEYVTVKPSQTQVLQGMFLPSCSGCRTPQIMQAVAIVGAIIMPHNIYXHSALVKSRHIDRAKRQEVREANKYFFIDCCIALFVSFIINTCVISVFAEAFFEKTNEQVVAVCKNSSSPHTHLFPDDNSTLAVDIYKGGVVLGCYFG…
XP_014332555.1	MCGSDPVESCSMNSDIQVSSIVLGPASSVQIPVPDEDAFGDHGDSASLGALNPAYSNSSIPQSSGGLSEEHFTTYLDENNAVLEEKHSCFSFRKLWVFTGPGLLMSVVDPGNIECDLQSGALAGFKLLWVLLLATIVGVLLQTLAARLGVVTGLHLAEVCYRQYPRVPRILLWLMVELAIIGVDMQEVIGSAIAINLLSAGRIPLWGGVLITIADTFAFLFLDNYGLRKLEAFFGFIFTVMALTFGYEYVTVKPSQTQVLKGMFLPSCSGCRTPQIMQAVAIVGAIIMPHNIYLHSALVKSRHIDRAKRQEVREANKYFFIDCCIALFVSFIINTCVISVFAEAFFEKTNEQVVAVCKNSSSPHTHLFPDDNSTLAVDIYKGGVVLGCYFGPAALYIWA…
KAA0734893.1	MKKQSKKEAAPHCELKSCSMNSDIQVSSIVLGPASSVQIPVPDEDAFGDHGDSASLGALNPAYSNSSIPQSSGGLSEEHFTTYLDENNAVLEEKHSCFSFRKLWVFTGPGLLMSVVDPGNIECDLQSGALAGFKLLWVLLLATIVGVLLQTLAARLGVVTGLHLAEVCYRQYPRVPRILLWLMVELAIIGVDMQEVIGSAIAINLLSAGRIPLWGGVLITIADTFAFLFLDNYGLRKLEAFFGFIFTVMALTFGYEYVTVKPSQTQVLKGMFLPSCSGCRTPQIMQAVAIVGAIIMPHNIYLHSALVKSRHIDRAKRQEVREANKYFFIDCCIALFVSFIINTCVISVFAEAFFEKTNEQVVAVCKNSSSPHTHLFPDDNSTLAVDIYKGGVVLGCYFG…
XP_010856130.1	MNSDIQVSSIVLGPASSVQIPVSDEDAFGDHGDSASFGALNPAYSNSSIPQSSGGLSEEHFTTYLDENNAVLEEKRSCFSFRKLWVFTGPGLLMSVVDPGNIECDLQSGALAGFKLLWVLLLATIVGVLLQTLAARLGVVTGLHLAEVCYRQYPRVPRILLWLMVELAIIGVDMQEVIGSAIAINLLSAGRIPLWGGVLITIADTFAFLFLDNYGLRKLEAFFGFIFTVMALTFGYEYVTVKPSQTQVLKGMFLPSCSGCRTPQIMQAVAIVGAIIMPHNIYLHSALVKSRHIDRAKRQEVREANKYFFIDCCIALFVSFIINTCVISVFAEAFFEKTNEQVVAVCKNSSSPHTHLFPDDNSTLAVDIYKGGVVLGCYFGPAALYIWAVGILAAGQSST…
XP_025139944.1	MKKQSKKVAAPHCELKSCSMNSDTQVSSIVLGPASSVQISVPDEDAFGDHGDSASLGAINPAYSNSSIPQSSRGLSEEQFTTYLDENHAVLEEKHSCFSFRKLWVFTGPGLLMSVVDPGNIECDLQSGALAGFKLLWVLLLATIVGVLLQTLAARLGVVTGLHLAEVCYRQYPRVPRILLWLMVELAIIGVDMQEVIGSAIAINLLSAGRIPLWGGVLITIADTFAFLFLDNYGLRKLETFFGFMFTVMALTFGYEYVTVNPSQTQILRGMFLPSCSDCHTPQIMQAVAIVGAIIMPHNIYLHSALVKSRHIDRAKRQEVREANKYFFIDCCIALFVSFIINTCVISVFAEAFFEKTNEQVVAVCKNSSSPHTHLFPDDNSTLAVDIYKGGVVLGCYFG…
XP_025139943.1	MKKQSKKVAAPHCELKSCSMNSDTQVSSIVLGPASSVQISVPDEDAFGDHGDSASLGAINPAYSNSSIPQSSRGLSEEQFTTYLDENHAVLEEKHSCFSFRKLWVFTGPGLLMSVVDPGNIECDLQSGALAGFKLLWVLLLATIVGVLLQTLAARLGVVTGLHLAEVCYRQYPRVPRILLWLMVELAIIGVDMQEVIGSAIAINLLSAGRIPLWGGVLITIADTFAFLFLDNYGLRKLETFFGFMFTVMALTFGYEYVTVNPSQTQILRGMFLPSCSDCHTPQIMQAVAIVGAIIMPHNIYLHSALVKSRHIDRAKRQEVREANKYFFIDCCIALFVSFIINTCVISVFAEAFFEKTNEQVVAVCKNSSSPHTHLFPDDNSTLAVDIYKGGVVLGCYFG…
ELR59051.1	QTVNSEDAFGDHGDSASLGALNPAYSNSSIPQSSGGLSEEHFTTYLDENNAVLEEKHSCFSFRKLWVFTGPGLLMSVVDPGNIECDLQSGALAGFKLLWVLLLATIVGVLLQTLAARLGVVTGLHLAEVCYRQYPRVPRILLWLMVELAIIGVDMQEVIGSAIAINLLSAGRIPLWGGVLITIADTFAFLFLDNYGLRKLEAFFGFIFTVMALTFGYEYVTVKPSQTQVLKGMFLPSCSGCRTPQIMQAVAIVGAIIMPHNIYLHSALVKSRHIDRAKRQEVREANKYFFIDCCIALFVSFIINTCVISVFAEAFFEKTNEQVVAVCKNSSSPHTHLFPDDNSTLAVDIYKGGVVLGCYFGPAALYIWAVGILAAGQSSTVTGTYSGQFVMEGFLNLKW…
XP_025139946.1	MKKQSKKVAAPHCELKSCSMNSDTQVSSIVLGPASSVQISVPDEDAFGDHGDSASLGAINPAYSNSSIPQSSRGLSEEQFTTYLDENHAVLEEKHSCFSFRKLWVFTGPGLLMSVVDPGNIECDLQSGALAGFKVPRILLWLMVELAIIGVDMQEVIGSAIAINLLSAGRIPLWGGVLITIADTFAFLFLDNYGLRKLETFFGFMFTVMALTFGYEYVTVNPSQTQILRGMFLPSCSDCHTPQIMQAVAIVGAIIMPHNIYLHSALVKSRHIDRAKRQEVREANKYFFIDCCIALFVSFIINTCVISVFAEAFFEKTNEQVVAVCKNSSSPHTHLFPDDNSTLAVDIYKGGVVLGCYFGPAALYIWAVGILAAGQSSTMTGTYSGQFVMEGFLNLKWSR…
NP_001039586.1	MKKQSKKEAAPHCELKSCSKNSDTQVSSIVLGPASSVQIPVPDEDAFGDHGDSASLGALNPAYSNSSIPQSSGGLSEEHFTTYLDENNAVLEEKHSCFSFRKLWVFTGPGLLMSVVDPGNIECDLQSGALAGFKVPRILLWLMVELAIIGVDMQEVIGSAIAINLLSAGRIPLWGGVLITIADTFAFLFLDNYGLRKLEAFFGFIFTVMALTFGYEYVTVKPSQTQVLKGMFLPSCSGCRTPQIMQAVAIVGAIIMPHNIYLHSALVKSRHIDRAKRQEVREANKYFFIDCCIALFVSFIINTCVISVFAEAFFEKTNEQVVAVCKNSSSPHTHLFPDDNSTLAVDIYKGGVVLGCYFGPAALYIWAVGILAAGQSSTVTGTYSGQFVMEGFLNLKWSR…
XP_010856133.1	MNSDIQVSSIVLGPASSVQIPVSDEDAFGDHGDSASFGALNPAYSNSSIPQSSGGLSEEHFTTYLDENNAVLEEKRSCFSFRKLWVFTGPGLLMSVVDPGNIECDLQSGALAGFKLLWVLLLATIVGVLLQTLAARLGVVTGLHLAEVCYRQYPRVPRILLWLMVELAIIGVDMQEVIGSAIAINLLSAGRIPLWGGVLITIADTFAFLFLDNYGLRKLEAFFGFIFTVMALTFGYEYVTVKPSQTQVLKGMFLPSCSGCRTPQIMQAVAIVGAIIMPHNIYLHSALVKSRHIDRAKRQEVREANKYFFIDCCIALFVSFIINTCVISVFAEAFFEKTNEQVGVVLGCYFGPAALYIWAVGILAAGQSSTVTGTYSGQFVMEGFLNLKWSRFARVSLTR…
XP_005892092.1	MKKQSKKEAAPHCELKSCSMNSDIQVSSIVLGPASSVQIPVPDEDAFGDHGDSASLGALNPAYSNSSIPQSSGGLSEEHFTTYLDENNAVLEEKHSCFSFRKLWVFTGPGLLMSVVDPGNIECDLQSGALAGFKVPRILLWLMVELAIIGVDMQEVIGSAIAINLLSAGRIPLWGGVLITIADTFAFLFLDNYGLRKLEAFFGFIFTVMALTFGYEYVTVKPSQTQVLKGMFLPSCSGCRTPQIMQAVAIVGAIIMPHNIYLHSALVKSRHIDRAKRQEVREANKYFFIDCCIALFVSFIINTCVISVFAEAFFEKTNEQVVAVCKNSSSPHTHLFPDDNSTLAVDIYKGGVVLGCYFGPAALYIWAVGILAAGQSSTVTGTYSGQFVMEGFLNLKWSR…
XP_017903260.1	MNSDTQVSSIVLGPAPSVQIPVADEDAFGDHGDSASLGAINPDYSNSSVPQSSGGVSEEPFTTYLDENHAVPEEKYSCFSFRKLWVFTGPGLLMSVVDPGNIECDLQSGALAGFKLLWVLLLATIVGVLLQTLAARLGVVTGLHLAEVCYRQYPRVPRILLWLMVELAIIGVDMQEVIGSAIAINLLSAGRIPLWGGVLITIADTLAFLFLDSYGLRKLEAFFGFIFTVMALTFGYEYVTVKPSQTQVLKGMFLPSCSDCHTPQIMQAVAIVGAIVMPHNIYLHSALVKSRHIDRAKRQEVREANKYFFIDSCIALFVSFIINTCVISVFAEAFFEKTNEQVVAVCKNSSSPHTHLFPDDNSTLAVDIYKGGVVLGCYFGPAALYIWAVGILAAGQSST…
XP_017903261.1	MNSDTQVSSIVLGPAPSVQIPVADEDAFGDHGDSASLGAINPDYSNSSVPQSSGGVSEEPFTTYLDENHAVPEEKYSCFSFRKLWVFTGPGLLMSVVDPGNIECDLQSGALAGFKLLWVLLLATIVGVLLQTLAARLGVVTGLHLAEVCYRQYPRVPRILLWLMVELAIIGVDMQEVIGSAIAINLLSAGRIPLWGGVLITIADTLAFLFLDSYGLRKLEAFFGFIFTVMALTFGYEYVTVKPSQTQVLKGMFLPSCSDCHTPQIMQAVAIVGAIVMPHNIYLHSALVKSRHIDRAKRQEVREANKYFFIDSCIALFVSFIINTCVISVFAEAFFEKTNEQVVAVCKNSSSPHTHLFPDDNSTLAVDIYKGGVVLGCYFGPAALYIWAVGILAAGQSST…
XP_027823129.1	MNSDTQVSSIVLGPAPSVQIPVADEDAFVGHGDSASLGAINPAYSNSSVPQSSGGLSEEPFTTYLDENHAVPEEKYSCFSFRKLWVFTGPGLLMSVVDPGNIECDLQSGALAGFKLLWVLLLATIVGVLLQTLAARLGVVTGLHLAEVCYRQYPRVPRILLWLMVELAIIGVDMQEVIGSAIAINLLSAGRIPLWGGVLITIADTLAFLFLDNYGLRKLEAFFGFIFTVMALTFGYEYVTVKPSQTQVLQGMFLPSCSDCRTPQIMQAVAIVGAIVMPHNIYLHSALVKSRHIDRAKRQEVREANKYFFIDSCIALFVSFIINTCVISVFAEAFFEKTNEQVVAVCKNSSSPHTHLFPDDNSTLAVDIYKGGVVLGCYFGPAALYIWAVGILAAGQSST…
XP_017903264.1	MNSDTQVSSIVLGPAPSVQIPVADEDAFGDHGDSASLGAINPDYSNSSVPQSSGGVSEEPFTTYLDENHAVPEEKYSCFSFRKLWVFTGPGLLMSVVDPGNIECDLQSGALAGFKVPRILLWLMVELAIIGVDMQEVIGSAIAINLLSAGRIPLWGGVLITIADTLAFLFLDSYGLRKLEAFFGFIFTVMALTFGYEYVTVKPSQTQVLKGMFLPSCSDCHTPQIMQAVAIVGAIVMPHNIYLHSALVKSRHIDRAKRQEVREANKYFFIDSCIALFVSFIINTCVISVFAEAFFEKTNEQVVAVCKNSSSPHTHLFPDDNSTLAVDIYKGGVVLGCYFGPAALYIWAVGILAAGQSSTMTGTYSGQFVMEGFLNLKWSRFARVILTRSIAIIPALLVA…
XP_017903265.1	MNSDTQVSSIVLGPAPSVQIPVADEDAFGDHGDSASLGAINPDYSNSSVPQSSGGVSEEPFTTYLDENHAVPEEKYSCFSFRKLWVFTGPGLLMSVVDPGNIECDLQSGALAGFKVPRILLWLMVELAIIGVDMQEVIGSAIAINLLSAGRIPLWGGVLITIADTLAFLFLDSYGLRKLEAFFGFIFTVMALTFGYEYVTVKPSQTQVLKGMFLPSCSDCHTPQIMQAVAIVGAIVMPHNIYLHSALVKSRHIDRAKRQEVREANKYFFIDSCIALFVSFIINTCVISVFAEAFFEKTNEQVVAVCKNSSSPHTHLFPDDNSTLAVDIYKGGVVLGCYFGPAALYIWAVGILAAGQSSTMTGTYSGQFVMEGFLNLKWSRFARVILTRSIAIIPALLVA…
XP_010803267.1	MKKQSKKEAAPHCELKSCSKNSDTQVSSIVLGPASSVQIPVPDEDAFGDHGDSASLGALNPAYSNSSIPQSSGGLSEEHFTTYLDENNAVLEEKHSCFSFRKLWVFTGPGLLMSVVDPGNIECDLQSGALAGFKLLWVLLLATIVGVLLQTLAARLGVVTGLHLAEVCYRQYPRVPRILLWLMVELAIIGVDMQEVIGSAIAINLLSAGRIPLWGGVLITIADTFAFLFLDNYGLRKLEAFFGFIFTVMALTFGYEYVTVKPSQTQVLKGMFLPSCSGCRTPQIMQAVAIVGAIIMPHNIYLHSALVKSRHIDRAKRQEVREANKYFFIDCCIALFVSFIINTCVISVFAEAFFEKTNEQVVAVCKNSSSPHTHLFPDDNSTLAVDIYKGGVVLGCYFG…
XP_024847402.1	MKKQSKKEAAPHCELKSCSKNSDTQVSSIVLGPASSVQIPVPDEDAFGDHGDSASLGALNPAYSNSSIPQSSGGLSEEHFTTYLDENNAVLEEKHSCFSFRKLWVFTGPGLLMSVVDPGNIECDLQSGALAGFKLLWVLLLATIVGVLLQTLAARLGVVTGLHLAEVCYRQYPRVPRILLWLMVELAIIGVDMQEVIGSAIAINLLSAGRIPLWGGVLITIADTFAFLFLDNYGLRKLEAFFGFIFTVMALTFGYEYVTVKPSQTQVLKGMFLPSCSGCRTPQIMQAVAIVGAIIMPHNIYLHSALVKSRHIDRAKRQEVREANKYFFIDCCIALFVSFIINTCVISVFAEAFFEKTNEQVGVVLGCYFGPAALYIWAVGILAAGQSSTVTGTYSGQFV…
XP_024847403.1	MKKQSKKEAAPHCELKSCSKNSDTQVSSIVLGPASSVQIPVPDEDAFGDHGDSASLGALNPAYSNSSIPQSSGGLSEEHFTTYLDENNAVLEEKHSCFSFRKLWVFTGPGLLMSVVDPGNIECDLQSGALAGFKVPRILLWLMVELAIIGVDMQEVIGSAIAINLLSAGRIPLWGGVLITIADTFAFLFLDNYGLRKLEAFFGFIFTVMALTFGYEYVTVKPSQTQVLKGMFLPSCSGCRTPQIMQAVAIVGAIIMPHNIYLHSALVKSRHIDRAKRQEVREANKYFFIDCCIALFVSFIINTCVISVFAEAFFEKTNEQVVAVCKNSSSPHTHLFPDDNSTLAVDIYKGGVVLGCYFGPAALYIWAVGILAAGQSSTVTGTYSGQFVMEGFLNLKWSR…
XP_025139942.1	MKKQSKKVAAPHCELKSCSMNSDTQVSSIVLGPASSVQISVPDEDAFGDHGDSASLGAINPAYSNSSIPQSSRGLSEEQFTTYLDENHAVLEEKHSCFSFRKLWVFTGPGLLMSVVDPGNIECDLQSGALAGFKLLWVLLLATIVGVLLQTLAARLGVVTGLHLAEVCYRQYPRVPRILLWLMVELAIIGVDMQEVIGSAIAINLLSAGRIPLWGGVLITIADTFAFLFLDNYGLRKLETFFGFMFTVMALTFGYEYVTVNPSQTQILRGMFLPSCSDCHTPQIMQAVAIVGAIIMPHNIYLHSALVKSRHIDRAKRQEVREANKYFFIDCCIALFVSFIINTCVISVFAEAFFEKTNEQVVAVCKNSSSPHTHLFPDDNSTLAVDIYKGGVVLGCYFG…
XP_025139945.1	MKKQSKKVAAPHCELKSCSMNSDTQVSSIVLGPASSVQISVPDEDAFGDHGDSASLGAINPAYSNSSIPQSSRGLSEEQFTTYLDENHAVLEEKHSCFSFRKLWVFTGPGLLMSVVDPGNIECDLQSGALAGFKVPRILLWLMVELAIIGVDMQEVIGSAIAINLLSAGRIPLWGGVLITIADTFAFLFLDNYGLRKLETFFGFMFTVMALTFGYEYVTVNPSQTQILRGMFLPSCSDCHTPQIMQAVAIVGAIIMPHNIYLHSALVKSRHIDRAKRQEVREANKYFFIDCCIALFVSFIINTCVISVFAEAFFEKTNEQVVAVCKNSSSPHTHLFPDDNSTLAVDIYKGGVVLGCYFGPAALYIWAVGILAAGQSSTMTGTYSGQFVMEGFLNLKWSR…
XP_010803277.1	MKKQSKKEAAPHCELKSCSKNSDTQVSSIVLGPASSVQIPVPDEDAFGDHGDSASLGALNPAYSNSSIPQSSGGLSEEHFTTYLDENNAVLEEKHSCFSFRKLWVFTGPGLLMSVVDPGNIECDLQSGALAGFKLLWVLLLATIVGVLLQTLAARLGVVTGLHLAEVCYRQYPRVPRILLWLMVELAIIGVDMQEVIGSAIAINLLSAGRIPLWGGVLITIADTFAFLFLDNYGLRKLEAFFGFIFTVMALTFGYEYVTVKPSQTQVLKGMFLPSCSGCRTPQIMQAVAIVGAIIMPHNIYLHSALVKSRHIDRAKRQEVREANKYFFIDCCIALFVSFIINTCVISVFAEAFFEKTNEQVVAVCKNSSSPHTHLFPDDNSTLAVDIYKGGVVLGCYFG…
XP_025139947.1	MKKQSKKVAAPHCELKSCSMNSDTQVSSIVLGPASSVQISVPDEDAFGDHGDSASLGAINPAYSNSSIPQSSRGLSEEQFTTYLDENHAVLEEKHSCFSFRKLWVFTGPGLLMSVVDPGNIECDLQSGALAGFKLLWVLLLATIVGVLLQTLAARLGVVTGLHLAEVCYRQYPRVPRILLWLMVELAIIGVDMQEVIGSAIAINLLSAGRIPLWGGVLITIADTFAFLFLDNYGLRKLETFFGFMFTVMALTFGYEYVTVNPSQTQILRGMFLPSCSDCHTPQIMQAVAIVGAIIMPHNIYLHSALVKSRHIDRAKRQEVREANKYFFIDCCIALFVSFIINTCVISVFAEAFFEKTNEQVVAVCKNSSSPHTHLFPDDNSTLAVDIYKGGVVLGCYFG…
XP_024847404.1	MKKQSKKEAAPHCELKSCSKNSDTQVSSIVLGPASSVQIPVPDEDAFGDHGDSASLGALNPAYSNSSIPQSSGGLSEEHFTTYLDENNAVLEEKHSCFSFRKLWVFTGPGLLMSVVDPGNIECDLQSGALAGFKLLWVLLLATIVGVLLQTLAARLGVVTGLHLAEVCYRQYPRVPRILLWLMVELAIIGVDMQEVIGSAIAINLLSAGRIPLWGGVLITIADTFAFLFLDNYGLRKLEAFFGFIFTVMALTFGYEYVTVKPSQTQVLKGMFLPSCSGCRTPQIMQAVAIVGAIIMPHNIYLHSALVKSRHIDRAKRQEVREANKYFFIDCCIALFVSFIINTCVISVFAEAFFEKTNEQVVAVCKNSSSPHTHLFPDDNSTLAVDIYKGGVVLGCYFG…
XP_025139948.1	MKKQSKKVAAPHCELKSCSMNSDTQVSSIVLGPASSVQISVPDEDAFGDHGDSASLGAINPAYSNSSIPQSSRGLSEEQFTTYLDENHAVLEEKHSCFSFRKLWVFTGPGLLMSVVDPGNIECDLQSGALAGFKLLWVLLLATIVGVLLQTLAARLGVVTGLHLAEVCYRQYPRVPRILLWLMVELAIIGVDMQEVIGSAIAINLLSAGRIPLWGGVLITIADTFAFLFLDNYGLRKLETFFGFMFTVMALTFGYEYVTVNPSQTQILRGMFLPSCSDCHTPQIMQAVAIVGAIIMPHNIYLHSALVKSRHIDRAKRQEVREANKYFFIDCCIALFVSFIINTCVISVFAEAFFEKTNEQVVAVCKNSSSPHTHLFPDDNSTLAVDIYKGGVVLGCYFG…
XP_017903259.1	MNSDTQVSSIVLGPAPSVQIPVADEDAFGDHGDSASLGAINPDYSNSSVPQSSGGVSEEPFTTYLDENHAVPEEKYSCFSFRKLWVFTGPGLLMSVVDPGNIECDLQSGALAGFKLLWVLLLATIVGVLLQTLAARLGVVTGLHLAEVCYRQYPRVPRILLWLMVELAIIGVDMQEVIGSAIAINLLSAGRIPLWGGVLITIADTLAFLFLDSYGLRKLEAFFGFIFTVMALTFGYEYVTVKPSQTQVLKGMFLPSCSDCHTPQIMQAVAIVGAIVMPHNIYLHSALVKSRHIDRAKRQEVREANKYFFIDSCIALFVSFIINTCVISVFAEAFFEKTNEQVVAVCKNSSSPHTHLFPDDNSTLAVDIYKGGVVLGCYFGPAALYIWAVGILAAGQSST…
XP_017903262.1	MNSDTQVSSIVLGPAPSVQIPVADEDAFGDHGDSASLGAINPDYSNSSVPQSSGGVSEEPFTTYLDENHAVPEEKYSCFSFRKLWVFTGPGLLMSVVDPGNIECDLQSGALAGFKVPRILLWLMVELAIIGVDMQEVIGSAIAINLLSAGRIPLWGGVLITIADTLAFLFLDSYGLRKLEAFFGFIFTVMALTFGYEYVTVKPSQTQVLKGMFLPSCSDCHTPQIMQAVAIVGAIVMPHNIYLHSALVKSRHIDRAKRQEVREANKYFFIDSCIALFVSFIINTCVISVFAEAFFEKTNEQVVAVCKNSSSPHTHLFPDDNSTLAVDIYKGGVVLGCYFGPAALYIWAVGILAAGQSSTMTGTYSGQFVMEGFLNLKWSRFARVILTRSIAIIPALLVA…
XP_017903266.1	MNSDTQVSSIVLGPAPSVQIPVADEDAFGDHGDSASLGAINPDYSNSSVPQSSGGVSEEPFTTYLDENHAVPEEKYSCFSFRKLWVFTGPGLLMSVVDPGNIECDLQSGALAGFKLLWVLLLATIVGVLLQTLAARLGVVTGLHLAEVCYRQYPRVPRILLWLMVELAIIGVDMQEVIGSAIAINLLSAGRIPLWGGVLITIADTLAFLFLDSYGLRKLEAFFGFIFTVMALTFGYEYVTVKPSQTQVLKGMFLPSCSDCHTPQIMQAVAIVGAIVMPHNIYLHSALVKSRHIDRAKRQEVREANKYFFIDSCIALFVSFIINTCVISVFAEAFFEKTNEQVVAVCKNSSSPHTHLFPDDNSTLAVDIYKGGVVLGCYFGPAALYIWAVGILAAGQSST…
XP_025139949.1	MKKQSKKVAAPHCELKSCSMNSDTQVSSIVLGPASSVQISVPDEDAFGDHGDSASLGAINPAYSNSSIPQSSRGLSEEQFTTYLDENHAVLEEKHSCFSFRKLWVFTGPGLLMSVVDPGNIECDLQSGALAGFKLLWVLLLATIVGVLLQTLAARLGVVTGLHLAEVCYRQYPRVPRILLWLMVELAIIGVDMQEVIGSAIAINLLSAGRIPLWGGVLITIADTFAFLFLDNYGLRKLETFFGFMFTVMALTFGYEYVTVNPSQTQILRGMFLPSCSDCHTPQIMQAVAIVGAIIMPHNIYLHSALVKSRHIDRAKRQEVREANKYFFIDCCIALFVSFIINTCVISVFAEAFFEKTNEQVVAVCKNSSSPHTHLFPDDNSTLAVDIYKGGVVLGCYFG…
XP_020763799.1	MNSDTQVSSIVLGPTSSVQIPVPDEDAFGDHGDSASLGAVNPAYSNSSIPQSSGGLSEEPFTTYLDENHDVPEEYSCFSFRKLWVFTGPGLLMSIVDPGNIECDLQSGALAGFKLLWVLLLATIIGVLFQTLAARLGVVTGLHLAEVCYRQYPRFPRILLWLMVELAIIGVDMQDVIGSAIAINLLSAGRIPLWGGVLITIADTFAFLFLDNYGLRKLEAFFGFIITVMALTFGYECVTVKPSQTQILKGMFLPSCSDCHTPQIMQAVAIVGAIITPHNIYLHSALVKSRHIDRAKRQEVREANKYFFTDCCVALFVSFIINTCVISVFAEAFFEKTNEQVVAVCKTSSSPHTHLFPEDNSTLAVDIYKGGVVLGCYFGPAALYIWAVGILAAGQSSTM…
XP_020763798.1	MLVLNFFLFVLANSTPSCLSFPESYSMNSDTQVSSIVLGPTSSVQIPVPDEDAFGDHGDSASLGAVNPAYSNSSIPQSSGGLSEEPFTTYLDENHDVPEEYSCFSFRKLWVFTGPGLLMSIVDPGNIECDLQSGALAGFKLLWVLLLATIIGVLFQTLAARLGVVTGLHLAEVCYRQYPRFPRILLWLMVELAIIGVDMQDVIGSAIAINLLSAGRIPLWGGVLITIADTFAFLFLDNYGLRKLEAFFGFIITVMALTFGYECVTVKPSQTQILKGMFLPSCSDCHTPQIMQAVAIVGAIITPHNIYLHSALVKSRHIDRAKRQEVREANKYFFTDCCVALFVSFIINTCVISVFAEAFFEKTNEQVVAVCKTSSSPHTHLFPEDNSTLAVDIYKGGVV…
XP_020763800.1	MLVLNFFLFVLANSTPSCLSFPESYSMNSDTQVSSIVLGPTSSVQIPVPDEDAFGDHGDSASLGAVNPAYSNSSIPQSSGGLSEEPFTTYLDENHDVPEEYSCFSFRKLWVFTGPGLLMSIVDPGNIECDLQSGALAGFKLLWVLLLATIIGVLFQTLAARLGVVTGLHLAEVCYRQYPRFPRILLWLMVELAIIGVDMQDVIGSAIAINLLSAGRIPLWGGVLITIADTFAFLFLDNYGLRKLEAFFGFIITVMALTFGYECVTVKPSQTQILKGMFLPSCSDCHTPQIMQAVAIVGAIITPHNIYLHSALVKSRHIDRAKRQEVREANKYFFTDCCVALFVSFIINTCVISVFAEAFFEKTNEQVGVVLGCYFGPAALYIWAVGILAAGQSSTMTGT…
XP_020763802.1	MLVLNFFLFVLANSTPSCLSFPESYSMNSDTQVSSIVLGPTSSVQIPVPDEDAFGDHGDSASLGAVNPAYSNSSIPQSSGGLSEEPFTTYLDENHDVPEEYSCFSFRKLWVFTGPGLLMSIVDPGNIECDLQSGALAGFKLLWVLLLATIIGVLFQTLAARLGVVTGLHLAEVCYRQYPRFPRILLWLMVELAIIGVDMQDVIGSAIAINLLSAGRIPLWGGVLITIADTFAFLFLDNYGLRKLEAFFGFIITVMALTFGYECVTVKPSQTQILKGMFLPSCSDCHTPQIMQAVAIVGAIITPHNIYLHSALVKSRHIDRAKRQEVREANKYFFTDCCVALFVSFIINTCVISVFAEAFFEKTNEQVVAVCKTSSSPHTHLFPEDNSTLAVDIYKGGVV…
XP_020763801.1	MLVLNFFLFVLANSTPSCLSFPESYSMNSDTQVSSIVLGPTSSVQIPVPDEDAFGDHGDSASLGAVNPAYSNSSIPQSSGGLSEEPFTTYLDENHDVPEEYSCFSFRKLWVFTGPGLLMSIVDPGNIECDLQSGALAGFKLLWVLLLATIIGVLFQTLAARLGVVTGLHLAEVCYRQYPRFPRILLWLMVELAIIGVDMQDVIGSAIAINLLSAGRIPLWGGVLITIADTFAFLFLDNYGLRKLEAFFGFIITVMALTFGYECVTVKPSQTQILKGMFLPSCSDCHTPQIMQAVAIVGAIITPHNIYLHSALVKSRHIDRAKRQEVREANKYFFTDCCVALFVSFIINTCVISVFAEAFFEKTNEQVVAVCKTSSSPHTHLFPEDNSTLAVDIYKGGVV…
XP_027398656.1	MKKQSKKEAAPHCELKSCSKNSDTQVSSIVLGPASSVQIPVPDEDAFGDHGDSASLGALNPAYSNSSIPQSSGGLSEEHFTTYLDENNAVLEEKHSCFSFRKLWVFTGPGLLMSVVDPGNIECDLQSGALAGFKLLWVLLLATIVGVLLQTLAARLGVVTGLHLAEVCYRQYPRVPRILLWLMVELAIIGVDMQEVIGSAIAINLLSAGRIPLWGGVLITIADTFAFLFLDNYGLRKLEAFFGFIFTVMALTFGYEYVTVKPSQTQVLKGMFLPSCSGCRTPQIMQAVAIVGAIIMPHNIYLHSALVKSRHIDRAKRQEVREANKYFFIDCCIALFVSFIINTCVISVFAEAFFEKTNEQVVAVCKNSSSPHTHLFPDDNSTLAVDIYKGGVVLGCYFG…
XP_010803272.1	MKKQSKKEAAPHCELKSCSKNSDTQVSSIVLGPASSVQIPVPDEDAFGDHGDSASLGALNPAYSNSSIPQSSGGLSEEHFTTYLDENNAVLEEKHSCFSFRKLWVFTGPGLLMSVVDPGNIECDLQSGALAGFKLLWVLLLATIVGVLLQTLAARLGVVTGLHLAEVCYRQYPRVPRILLWLMVELAIIGVDMQEVIGSAIAINLLSAGRIPLWGGVLITIADTFAFLFLDNYGLRKLEAFFGFIFTVMALTFGYEYVTVKPSQTQVLKGMFLPSCSGCRTPQIMQAVAIVGAIIMPHNIYLHSALVKSRHIDRAKRQEVREANKYFFIDCCIALFVSFIINTCVISVFAEAFFEKTNEQVVAVCKNSSSPHTHLFPDDNSTLAVDIYKGGVVLGCYFG…
XP_010803271.1	MKKQSKKEAAPHCELKSCSKNSDTQVSSIVLGPASSVQIPVPDEDAFGDHGDSASLGALNPAYSNSSIPQSSGGLSEEHFTTYLDENNAVLEEKHSCFSFRKLWVFTGPGLLMSVVDPGNIECDLQSGALAGFKLLWVLLLATIVGVLLQTLAARLGVVTGLHLAEVCYRQYPRVPRILLWLMVELAIIGVDMQEVIGSAIAINLLSAGRIPLWGGVLITIADTFAFLFLDNYGLRKLEAFFGFIFTVMALTFGYEYVTVKPSQTQVLKGMFLPSCSGCRTPQIMQAVAIVGAIIMPHNIYLHSALVKSRHIDRAKRQEVREANKYFFIDCCIALFVSFIINTCVISVFAEAFFEKTNEQVVAVCKNSSSPHTHLFPDDNSTLAVDIYKGGVVLGCYFG…
XP_010803274.1	MKKQSKKEAAPHCELKSCSKNSDTQVSSIVLGPASSVQIPVPDEDAFGDHGDSASLGALNPAYSNSSIPQSSGGLSEEHFTTYLDENNAVLEEKHSCFSFRKLWVFTGPGLLMSVVDPGNIECDLQSGALAGFKLLWVLLLATIVGVLLQTLAARLGVVTGLHLAEVCYRQYPRVPRILLWLMVELAIIGVDMQEVIGSAIAINLLSAGRIPLWGGVLITIADTFAFLFLDNYGLRKLEAFFGFIFTVMALTFGYEYVTVKPSQTQVLKGMFLPSCSGCRTPQIMQAVAIVGAIIMPHNIYLHSALVKSRHIDRAKRQEVREANKYFFIDCCIALFVSFIINTCVISVFAEAFFEKTNEQVVAVCKNSSSPHTHLFPDDNSTLAVDIYKGGVVLGCYFG…
XP_020763804.1	MSIVDPGNIECDLQSGALAGFKLLWVLLLATIIGVLFQTLAARLGVVTGLHLAEVCYRQYPRFPRILLWLMVELAIIGVDMQDVIGSAIAINLLSAGRIPLWGGVLITIADTFAFLFLDNYGLRKLEAFFGFIITVMALTFGYECVTVKPSQTQILKGMFLPSCSDCHTPQIMQAVAIVGAIITPHNIYLHSALVKSRHIDRAKRQEVREANKYFFTDCCVALFVSFIINTCVISVFAEAFFEKTNEQVVAVCKTSSSPHTHLFPEDNSTLAVDIYKGGVVLGCYFGPAALYIWAVGILAAGQSSTMTGTYSGQFVMEGFLNLKWSRFARVILTRSIAIIPTLLVAVFQDVEHLTGLNDILNVLQSLQLPFALIPILTYTSFRPVMSEFANGLGLRIVG…
XP_010803279.1	MKKQSKKEAAPHCELKSCSKNSDTQVSSIVLGPASSVQIPVPDEDAFGDHGDSASLGALNPAYSNSSIPQSSGGLSEEHFTTYLDENNAVLEEKHSCFSFRKLWVFTGPGLLMSVVDPGNIECDLQSGALAGFKLLWVLLLATIVGVLLQTLAARLGVVTGLHLAEVCYRQYPRVPRILLWLMVELAIIGVDMQEVIGSAIAINLLSAGRIPLWGGVLITIADTFAFLFLDNYGLRKLEAFFGFIFTVMALTFGYEYVTVKPSQTQVLKGMFLPSCSGCRTPQIMQAVAIVGAIIMPHNIYLHSALVKSRHIDRAKRQEVREANKYFFIDCCIALFVSFIINTCVISVFAEAFFEKTNEQVGVVLGCYFGPAALYIWAVGILAAGQSSTVTGTYSGQFV…
XP_010856134.1	MNSDIQVSSIVLGPASSVQIPVSDEDAFGDHGDSASFGALNPAYSNSSIPQSSGGLSEEHFTTYLDENNAVLEEKRSCFSFRKLWVFTGPGLLMSVVDPGNIECDLQSGALAGFKLLWVLLLATIVGVLLQTLAARLGVVTGLHLAEVCYRQYPRVPRILLWLMVELAIIGVDMQEVIGSAIAINLLSAGRIPLWGGVLITIADTFAFLFLDNYGLRKLEAFFGFIFTVMALTFGYEYVTVKPSQTQVLKGMFLPSCSGCRTPQIMQAVAIVGAIIMPHNIYLHSALVKSRHIDRAKRQEVREANKYFFIDCCIALFVSFIINTCVISVFAEAFFEKTNEQVVAVCKNSSSPHTHLFPDDNSTLAVDIYKGGVVLGCYFGPAALYIWAVGILAAGQSST…
XP_027823130.1	MNSDTQVSSIVLGPAPSVQIPVADEDAFVGHGDSASLGAINPAYSNSSVPQSSGGLSEEPFTTYLDENHAVPEEKYSCFSFRKLWVFTGPGLLMSVVDPGNIECDLQSGALAGFKLLWVLLLATIVGVLLQTLAARLGVVTGLHLAEVCYRQYPRVPRILLWLMVELAIIGVDMQEVIGSAIAINLLSAGRIPLWGGVLITIADTLAFLFLDNYGLRKLEAFFGFIFTVMALTFGYEYVTVKPSQTQVLQGMFLPSCSDCRTPQIMQAVAIVGAIVMPHNIYLHSALVKSRHIDRAKRQEVREANKYFFIDSCIALFVSFIINTCVISVFAEAFFEKTNEQVVAVCKNSSSPHTHLFPDDNSTLAVDIYKGGVVLGCYFGPAALYIWAVGILAAGQSST…
XP_017903267.1	MNSDTQVSSIVLGPAPSVQIPVADEDAFGDHGDSASLGAINPDYSNSSVPQSSGGVSEEPFTTYLDENHAVPEEKYSCFSFRKLWVFTGPGLLMSVVDPGNIECDLQSGALAGFKLLWVLLLATIVGVLLQTLAARLGVVTGLHLAEVCYRQYPRVPRILLWLMVELAIIGVDMQEVIGSAIAINLLSAGRIPLWGGVLITIADTLAFLFLDSYGLRKLEAFFGFIFTVMALTFGYEYVTVKPSQTQVLKGMFLPSCSDCHTPQIMQAVAIVGAIVMPHNIYLHSALVKSRHIDRAKRQEVREANKYFFIDSCIALFVSFIINTCVISVFAEAFFEKTNEQVVAVCKNSSSPHTHLFPDDNSTLAVDIYKGGVVLGCYFGPAALYIWAVGILAAGQSST…
XP_025139951.1	MKKQSKKVAAPHCELKSCSMNSDTQVSSIVLGPASSVQISVPDEDAFGDHGDSASLGAINPAYSNSSIPQSSRGLSEEQFTTYLDENHAVLEEKHSCFSFRKLWVFTGPGLLMSVVDPGNIECDLQSGALAGFKLLWVLLLATIVGVLLQTLAARLGVVTGLHLAEVCYRQYPRVPRILLWLMVELAIIGVDMQEVIGSAIAINLLSAGRIPLWGGVLITIADTFAFLFLDNYGLRKLETFFGFMFTVMALTFGYEYVTVNPSQTQILRGMFLPSCSDCHTPQIMQAVAIVGAIIMPHNIYLHSALVKSRHIDRAKRQEVREANKYFFIDCCIALFVSFIINTCVISVFAEAFFEKTNEQVVAVCKNSSSPHTHLFPDDNSTLAVDIYKGGVVLGCYFG…
XP_025139950.1	MKKQSKKVAAPHCELKSCSMNSDTQVSSIVLGPASSVQISVPDEDAFGDHGDSASLGAINPAYSNSSIPQSSRGLSEEQFTTYLDENHAVLEEKHSCFSFRKLWVFTGPGLLMSVVDPGNIECDLQSGALAGFKLLWVLLLATIVGVLLQTLAARLGVVTGLHLAEVCYRQYPRVPRILLWLMVELAIIGVDMQEVIGSAIAINLLSAGRIPLWGGVLITIADTFAFLFLDNYGLRKLETFFGFMFTVMALTFGYEYVTVNPSQTQILRGMFLPSCSDCHTPQIMQAVAIVGAIIMPHNIYLHSALVKSRHIDRAKRQEVREANKYFFIDCCIALFVSFIINTCVISVFAEAFFEKTNEQVVAVCKNSSSPHTHLFPDDNSTLAVDIYKGGVVLGCYFG…
XP_024847407.1	MKKQSKKEAAPHCELKSCSKNSDTQVSSIVLGPASSVQIPVPDEDAFGDHGDSASLGALNPAYSNSSIPQSSGGLSEEHFTTYLDENNAVLEEKHSCFSFRKLWVFTGPGLLMSVVDPGNIECDLQSGALAGFKLLWVLLLATIVGVLLQTLAARLGVVTGLHLAEVCYRQYPRVPRILLWLMVELAIIGVDMQEVIGSAIAINLLSAGRIPLWGGVLITIADTFAFLFLDNYGLRKLEAFFGFIFTVMALTFGYEYVTVKPSQTQVLKGMFLPSCSGCRTPQIMQAVAIVGAIIMPHNIYLHSALVKSRHIDRAKRQEVREANKYFFIDCCIALFVSFIINTCVISVFAEAFFEKTNEQVVAVCKNSSSPHTHLFPDDNSTLAVDIYKGGVVLGCYFG…
XP_024847406.1	MKKQSKKEAAPHCELKSCSKNSDTQVSSIVLGPASSVQIPVPDEDAFGDHGDSASLGALNPAYSNSSIPQSSGGLSEEHFTTYLDENNAVLEEKHSCFSFRKLWVFTGPGLLMSVVDPGNIECDLQSGALAGFKLLWVLLLATIVGVLLQTLAARLGVVTGLHLAEVCYRQYPRVPRILLWLMVELAIIGVDMQEVIGSAIAINLLSAGRIPLWGGVLITIADTFAFLFLDNYGLRKLEAFFGFIFTVMALTFGYEYVTVKPSQTQVLKGMFLPSCSGCRTPQIMQAVAIVGAIIMPHNIYLHSALVKSRHIDRAKRQEVREANKYFFIDCCIALFVSFIINTCVISVFAEAFFEKTNEQVVAVCKNSSSPHTHLFPDDNSTLAVDIYKGGVVLGCYFG…
XP_010856135.1	MNSDIQVSSIVLGPASSVQIPVSDEDAFGDHGDSASFGALNPAYSNSSIPQSSGGLSEEHFTTYLDENNAVLEEKRSCFSFRKLWVFTGPGLLMSVVDPGNIECDLQSGALAGFKLLWVLLLATIVGVLLQTLAARLGVVTGLHLAEVCYRQYPRVPRILLWLMVELAIIGVDMQEVIGSAIAINLLSAGRIPLWGGVLITIADTFAFLFLDNYGLRKLEAFFGFIFTVMALTFGYEYVTVKPSQTQVLKGMFLPSCSGCRTPQIMQAVAIVGAIIMPHNIYLHSALVKSRHIDRAKRQEVREANKYFFIDCCIALFVSFIINTCVISVFAEAFFEKTNEQVGVVLGCYFGPAALYIWAVGILAAGQSSTVTGTYSGQFVMEGFLNLKWSRFARVSLTR…
XP_024847408.1	MSVVDPGNIECDLQSGALAGFKLLWVLLLATIVGVLLQTLAARLGVVTGLHLAEVCYRQYPRVPRILLWLMVELAIIGVDMQEVIGSAIAINLLSAGRIPLWGGVLITIADTFAFLFLDNYGLRKLEAFFGFIFTVMALTFGYEYVTVKPSQTQVLKGMFLPSCSGCRTPQIMQAVAIVGAIIMPHNIYLHSALVKSRHIDRAKRQEVREANKYFFIDCCIALFVSFIINTCVISVFAEAFFEKTNEQVVAVCKNSSSPHTHLFPDDNSTLAVDIYKGGVVLGCYFGPAALYIWAVGILAAGQSSTVTGTYSGQFVMEGFLNLKWSRFARVSLTRSIAIIPALLVAVFQDMEHLTGLNDILNVLQSLQLPFALIPILTYTSLRPVMSEFANGLVGSVSL…
XP_017903269.1	MSVVDPGNIECDLQSGALAGFKLLWVLLLATIVGVLLQTLAARLGVVTGLHLAEVCYRQYPRVPRILLWLMVELAIIGVDMQEVIGSAIAINLLSAGRIPLWGGVLITIADTLAFLFLDSYGLRKLEAFFGFIFTVMALTFGYEYVTVKPSQTQVLKGMFLPSCSDCHTPQIMQAVAIVGAIVMPHNIYLHSALVKSRHIDRAKRQEVREANKYFFIDSCIALFVSFIINTCVISVFAEAFFEKTNEQVVAVCKNSSSPHTHLFPDDNSTLAVDIYKGGVVLGCYFGPAALYIWAVGILAAGQSSTMTGTYSGQFVMEGFLNLKWSRFARVILTRSIAIIPALLVAVFQDVEHLTGLNDILNVLQSLQLPFALIPILTYTSLQPVMSEFANGLVGNVSL…
XP_017903268.1	MNSDTQVSSIVLGPAPSVQIPVADEDAFGDHGDSASLGAINPDYSNSSVPQSSGGVSEEPFTTYLDENHAVPEEKYSCFSFRKLWVFTGPGLLMSVVDPGNIECDLQSGALAGFKLLWVLLLATIVGVLLQTLAARLGVVTGLHLAEVCYRQYPRVPRILLWLMVELAIIGVDMQEVIGSAIAINLLSAGRIPLWGGVLITIADTLAFLFLDSYGLRKLEAFFGFIFTVMALTFGYEYVTVKPSQTQVLKGMFLPSCSDCHTPQIMQAVAIVGAIVMPHNIYLHSALVKSRHIDRAKRQEVREANKYFFIDSCIALFVSFIINTCVISVFAEAFFEKTNEQVVAVCKNSSSPHTHLFPDDNSTLAVDIYKGGVVLGCYFGPAALYIWAVGILAAGQSST…
XP_027823131.1	MNSDTQVSSIVLGPAPSVQIPVADEDAFVGHGDSASLGAINPAYSNSSVPQSSGGLSEEPFTTYLDENHAVPEEKYSCFSFRKLWVFTGPGLLMSVVDPGNIECDLQSGALAGFKLLWVLLLATIVGVLLQTLAARLGVVTGLHLAEVCYRQYPRVPRILLWLMVELAIIGVDMQEVIGSAIAINLLSAGRIPLWGGVLITIADTLAFLFLDNYGLRKLEAFFGFIFTVMALTFGYEYVTVKPSQTQVLQGMFLPSCSDCRTPQIMQAVAIVGAIVMPHNIYLHSALVKSRHIDRAKRQEVREANKYFFIDSCIALFVSFIINTCVISVFAEAFFEKTNEQVVAVCKNSSSPHTHLFPDDNSTLAVDIYKGGVVLGCYFGPAALYIWAVGILAAGQSST…
XP_027700095.1	MGKKQAKSEAAPNCELKSYSKSSDVPASTMTLSSDQKMPAEDGSGDHGDTASLGAVNTIYSSNSPSEASASQEEPFTTYFDEKVSIPEEEYSCFSFRKLWAFTGPGFLMSIAYLDPGNIESDLQSGAVAQFKLLWVLLLATIVGLLLQRLAARLGVVTGLHLAEVCHRQYPKVPRIILWLMVETAIIGSDMQEVIGSAIAINLLSSGKVPLWGGVLITIADTFMFLFLDKYGLRKLEAFFGFLITIMALTFGYEYITVKPNQAEVLKGMFVPSCSGCSTPQVEQAVGIVGAVIMPHNMYLHSALVKSRQVNRASKREVREANKYFFIESCIALFVSFIINVFVVSVFAEAFYNETNKQVHDICVNNSSPHSDLFPLNDTMLTVDLYKGGVVLGCYFGPA…
XP_027700099.1	MTLESYSKSSDVPASTMTLSSDQKMPAEDGSGDHGDTASLGAVNTIYSSNSPSEASASQEEPFTTYFDEKVSIPEEEYSCFSFRKLWAFTGPGFLMSIAYLDPGNIESDLQSGAVAQFKLLWVLLLATIVGLLLQRLAARLGVVTGLHLAEVCHRQYPKVPRIILWLMVETAIIGSDMQEVIGSAIAINLLSSGKVPLWGGVLITIADTFMFLFLDKYGLRKLEAFFGFLITIMALTFGYEYITVKPNQAEVLKGMFVPSCSGCSTPQVEQAVGIVGAVIMPHNMYLHSALVKSRQVNRASKREVREANKYFFIESCIALFVSFIINVFVVSVFAEAFYNETNKQVHDICVNNSSPHSDLFPLNDTMLTVDLYKGGVVLGCYFGPAALYIWAVGILAAG…
XP_027700093.1	MIVSSSLKVFKWRLEGGEGRDSDFLEEVPAKESYSKSSDVPASTMTLSSDQKMPAEDGSGDHGDTASLGAVNTIYSSNSPSEASASQEEPFTTYFDEKVSIPEEEYSCFSFRKLWAFTGPGFLMSIAYLDPGNIESDLQSGAVAQFKLLWVLLLATIVGLLLQRLAARLGVVTGLHLAEVCHRQYPKVPRIILWLMVETAIIGSDMQEVIGSAIAINLLSSGKVPLWGGVLITIADTFMFLFLDKYGLRKLEAFFGFLITIMALTFGYEYITVKPNQAEVLKGMFVPSCSGCSTPQVEQAVGIVGAVIMPHNMYLHSALVKSRQVNRASKREVREANKYFFIESCIALFVSFIINVFVVSVFAEAFYNETNKQVHDICVNNSSPHSDLFPLNDTMLTVD…
XP_027700097.1	MSMGSTTPESYSKSSDVPASTMTLSSDQKMPAEDGSGDHGDTASLGAVNTIYSSNSPSEASASQEEPFTTYFDEKVSIPEEEYSCFSFRKLWAFTGPGFLMSIAYLDPGNIESDLQSGAVAQFKLLWVLLLATIVGLLLQRLAARLGVVTGLHLAEVCHRQYPKVPRIILWLMVETAIIGSDMQEVIGSAIAINLLSSGKVPLWGGVLITIADTFMFLFLDKYGLRKLEAFFGFLITIMALTFGYEYITVKPNQAEVLKGMFVPSCSGCSTPQVEQAVGIVGAVIMPHNMYLHSALVKSRQVNRASKREVREANKYFFIESCIALFVSFIINVFVVSVFAEAFYNETNKQVHDICVNNSSPHSDLFPLNDTMLTVDLYKGGVVLGCYFGPAALYIWAVG…
XP_027700100.1	MTLSSDQKMPAEDGSGDHGDTASLGAVNTIYSSNSPSEASASQEEPFTTYFDEKVSIPEEEYSCFSFRKLWAFTGPGFLMSIAYLDPGNIESDLQSGAVAQFKLLWVLLLATIVGLLLQRLAARLGVVTGLHLAEVCHRQYPKVPRIILWLMVETAIIGSDMQEVIGSAIAINLLSSGKVPLWGGVLITIADTFMFLFLDKYGLRKLEAFFGFLITIMALTFGYEYITVKPNQAEVLKGMFVPSCSGCSTPQVEQAVGIVGAVIMPHNMYLHSALVKSRQVNRASKREVREANKYFFIESCIALFVSFIINVFVVSVFAEAFYNETNKQVHDICVNNSSPHSDLFPLNDTMLTVDLYKGGVVLGCYFGPAALYIWAVGILAAGQSSTMTGTYSGQFVME…
XP_027700094.1	MIVSSSLKVFKWRLEGGEGRDSDFLEEVPAKESYSKSSDVPASTMTLSSDQKMPAEDGSGDHGDTASLGAVNTIYSSNSPSEASASQEEPFTTYFDEKVSIPEEEYSCFSFRKLWAFTGPGFLMSIAYLDPGNIESDLQSGAVAQFKLLWVLLLATIVGLLLQRLAARLGVVTGLHLAEVCHRQYPKVPRIILWLMVETAIIGSDMQEVIGSAIAINLLSSGKVPLWGGVLITIADTFMFLFLDKYGLRKLEAFFGFLITIMALTFGYEYITVKPNQAEVLKGMFVPSCSGCSTPQVEQAVGIVGAVIMPHNMYLHSALVKSRQVNRASKREVREANKYFFIESCIALFVSFIINVFVVSVFAEAFYNETNKQVHDICVNNSSPHSDLFPLNDTMLTVD…
XP_020821784.1	MGKKQAKSEAAPNCELKSYSKSSGAPASAMTLSSNQKMPAEDGSGDHGDTASLDAVNTIYSSHSPSRASASQEEPFTTYFDEKVSIPEEEYSCFSFRKLWAFTGPGFLMSIAYLDPGNIESDLQXGAVAQFKLLWVLLLATIVGLLLQRLAARLGVVTGLHLAEVCHRQYPKVPRIILWLMVETAIIGSDMQEVIGSAIAINLLSSGKVPLWGGVLITIADTFVFLFLDKYGLRKLEAFFGFLITVMALTFGYEYITVKPNQAEVLKGMFIPSCSGCRTPQIEQAVGVVGAVIMPHNMYLHSALVKSRQVNRASKREVREANKYFFIESTIALFVSFIINVFVVSVFAEAFYNETNEQVHEICVNSSSPNSDLFPLNDTALTVDLYKGGVVLGCYFGPA…
XP_023361244.1	MTLSSKEKMPAEDGSGDHGDTASLSAVNTIYSNHSPSEASAFQDAPFTTYFDEKIFIPEEEHSCFSFRKLWAFTGPGFLMSIAYLDPGNIESDLQSGAVGQFKLLWVLLLATLVGLLLQRLAARLGVVTGLHLAEVCHRQYPKVPRIILWLMVETAIIGSDMQEVIGSAIAINLLSVGRVPLWGGVLITIADTFVFLFLDKYGLRKLEAFFGLLITIMALTFGYEYVTVKPNQVEVLKGMFIPSCSGCGTRQIEQAVGIVGAVIMPHNMYLHSALVKSRQVNRANKREIREANKYFFIESCIALFVSFIINVFVVSVFAEAFFNQTNMQVREICLNSSSPHSNLFPESNTTLTVDLYKGGVVLGCYFGPAALYIWAVGILAAGQSSTMTGTYSGQFVME…
XP_007502973.1	MGKKQANKETAPSCELKSYSKSSEGPMSTMTLNSNQKMPAEDGSGDHGDTASLGAVNTIYSSRSPSQAGEEPFDTYFGEKISVPDEEYSCFSFRKLWAFTGPGFLMSIAYLDPGNIESDLQSGAVAGFKLLWVLLMATLVGLLLQRLAARLGVVTGLHLAEVCHRQYPKVPRIILWLMVETAIIGSDMQEVIGSAIAINLLSAGRVPLWGGVLITIADTFVFLFLDKYGLRKLEAFFGLLITIMALTFGYEYITVRPSQSEVLKGMFVPSCSGCSTSQVEQAVGIVGAVIMPHNMYLHSALVKSRQVNRSKKQEIREANKYFFIESCIALFVSFIINVFVVSVFAEAFYGQSNMEVHEICVNKSSPHSDLFPQDNSTLTVDLYKGGVVLGCYFGPVALY…
XP_007502977.1	MDCFPRKQSYSKSSEGPMSTMTLNSNQKMPAEDGSGDHGDTASLGAVNTIYSSRSPSQAGEEPFDTYFGEKISVPDEEYSCFSFRKLWAFTGPGFLMSIAYLDPGNIESDLQSGAVAGFKLLWVLLMATLVGLLLQRLAARLGVVTGLHLAEVCHRQYPKVPRIILWLMVETAIIGSDMQEVIGSAIAINLLSAGRVPLWGGVLITIADTFVFLFLDKYGLRKLEAFFGLLITIMALTFGYEYITVRPSQSEVLKGMFVPSCSGCSTSQVEQAVGIVGAVIMPHNMYLHSALVKSRQVNRSKKQEIREANKYFFIESCIALFVSFIINVFVVSVFAEAFYGQSNMEVHEICVNKSSPHSDLFPQDNSTLTVDLYKGGVVLGCYFGPVALYIWAVGILAA…
XP_007502976.1	MSTMTLNSNQKMPAEDGSGDHGDTASLGAVNTIYSSRSPSQAGEEPFDTYFGEKISVPDEEYSCFSFRKLWAFTGPGFLMSIAYLDPGNIESDLQSGAVAGFKLLWVLLMATLVGLLLQRLAARLGVVTGLHLAEVCHRQYPKVPRIILWLMVETAIIGSDMQEVIGSAIAINLLSAGRVPLWGGVLITIADTFVFLFLDKYGLRKLEAFFGLLITIMALTFGYEYITVRPSQSEVLKGMFVPSCSGCSTSQVEQAVGIVGAVIMPHNMYLHSALVKSRQVNRSKKQEIREANKYFFIESCIALFVSFIINVFVVSVFAEAFYGQSNMEVHEICVNKSSPHSDLFPQDNSTLTVDLYKGGVVLGCYFGPVALYIWAVGILAAGQSSTMTGTYSGQFVME…
XP_007502974.1	MGKKQANKETAPSCELKSYSKSSEGPMSTMTLNSNQKMPAEDGSGDHGDTASLGAVNTIYSSRSPSQAGEEPFDTYFGEKISVPDEEYSCFSFRKLWAFTGPGFLMSIAYLDPGNIESDLQSGAVAGFKLLWVLLMATLVGLLLQRLAARLGVVTGLHLAEVCHRQYPKVPRIILWLMVETAIIGSDMQEVIGSAIAINLLSAGRVPLWGGVLITIADTFVFLFLDKYGLRKLEAFFGLLITIMALTFGYEYITVRPSQSEVLKGMFVPSCSGCSTSQVEQAVGIVGAVIMPHNMYLHSALVKSRQVNRSKKQEIREANKYFFIESCIALFVSFIINVFVVSVFAEAFYGQSNMEVHEICVNKSSPHSDLFPQDNSTLTVDLYKGGVVLGCYFGPVALY…
XP_007502975.1	MGKKQANKETAPSCELKSYSKSSEGPMSTMTLNSNQKMPAEDGSGDHGDTASLGAVNTIYSSRSPSQAGEEPFDTYFGEKISVPDEEYSCFSFRKLWAFTGPGFLMSIAYLDPGNIESDLQSGAVAGFKLLWVLLMATLVGLLLQRLAARLGVVTGLHLAEVCHRQYPKVPRIILWLMVETAIIGSDMQEVIGSAIAINLLSAGRVPLWGGVLITIADTFVFLFLDKYGLRKLEAFFGLLITIMALTFGYEYITVRPSQSEVLKGMFVPSCSGCSTSQVEQAVGIVGAVIMPHNMYLHSALVKSRQVNRSKKQEIREANKYFFIESCIALFVSFIINVFVVSVFAEAFYGQSNMEVHEICVNKSSPHSDLFPQDNSTLTVDLYKGGVVLGCYFGPVALY…
XP_028929086.1	MARRQAKKPPASLCELKSYSVKDPSCQPPTMAPGTERQPPGDGSGDARDAVSTIYSNPAASHPADPPGEPFATYFDEKIPIPEDRKSSCFSFRKLWAFTGPGFLMSIAYLDPGNIESDLQSGAVAGFKLLWILLLATIVGLLLQRLAARLGVVTGLHLAEVCHRQYPKVPRIILWLMVETAIIGSDMQEVIGSAIALNLLSVGRIPLWGGVLITIADTFVFLFLDKYGLRKLEAFFGFLITVMAVTFGYEYVTVRPDQSQVLRGLFVPSCQGCKTRQLEQAVGIVGAVIMPHNLYLHSALVKSRQVNRADKKEVREANKYFFIESCIALFVSFIINVFVVSVFAEAFYNQTNQEVHDVCVNSSSPQAGLFPQNNSTLTVDIYKGGVVLGCYFGPAALYI…
XP_028929087.1	MAPGTERQPPGDGSGDARDAVSTIYSNPAASHPADPPGEPFATYFDEKIPIPEDRKSSCFSFRKLWAFTGPGFLMSIAYLDPGNIESDLQSGAVAGFKLLWILLLATIVGLLLQRLAARLGVVTGLHLAEVCHRQYPKVPRIILWLMVETAIIGSDMQEVIGSAIALNLLSVGRIPLWGGVLITIADTFVFLFLDKYGLRKLEAFFGFLITVMAVTFGYEYVTVRPDQSQVLRGLFVPSCQGCKTRQLEQAVGIVGAVIMPHNLYLHSALVKSRQVNRADKKEVREANKYFFIESCIALFVSFIINVFVVSVFAEAFYNQTNQEVHDVCVNSSSPQAGLFPQNNSTLTVDIYKGGVVLGCYFGPAALYIWAVGILAAGQSSTMTGTYSGQFVMEGFLNL…
XP_030672420.1	MNVTDFVLLSCSGSFCWPPLWGSCSSGLQLDWEWSLGCILLKYVTVSIPSFPSPLGLHCPLQLPSGHFGPFLPLPKVPRIILWLMVELAIIGSDMQEVIGSAIAINLLSVGRIPLWGGVLITIADTFVFLFLDKYGLRKLEAFFGFLITIMALTFGYEYVTVKPSQSQVLKGMFVPSCSGCRTPQIEQAVGIVGAVIMPHNMYLHSALVKSRQVNRNNKQEVREANKYFFIESCIALFVSFIINVFVVSVFAEAFFGKTNEQVVEVCTNTSSPHAGLFPKDNSTLAVDIYKGGVVLGCYFGPAALYIWAVGILAAGQSSTMTGTYSGQFVMEGFLNLKWSRFARVVLTRSIAIIPTLLVAVFQDVEHLTGMNDFLNVLQSLQLPFALIPILTFTSLRPV…
XP_030672421.1	MEITFSSSRKEKEESKMNYCLDLRSQALPRGSTLFLLQVPRIILWLMVELAIIGSDMQEVIGSAIAINLLSVGRIPLWGGVLITIADTFVFLFLDKYGLRKLEAFFGFLITIMALTFGYEYVTVKPSQSQVLKGMFVPSCSGCRTPQIEQAVGIVGAVIMPHNMYLHSALVKSRQVNRNNKQEVREANKYFFIESCIALFVSFIINVFVVSVFAEAFFGKTNEQVVEVCTNTSSPHAGLFPKDNSTLAVDIYKGGVVLGCYFGPAALYIWAVGILAAGQSSTMTGTYSGQFVMEGFLNLKWSRFARVVLTRSIAIIPTLLVAVFQDVEHLTGMNDFLNVLQSLQLPFALIPILTFTSLRPVMSDFANGLGWRIAGGILVLVICSINMYFVMVYVRDLGH…
XP_006900293.1	MVLGPKQKMPDDTTSGDHGDTASLGAVSPTYSTTPLSQSEYNEDDFTTYFNEKVPVPQGEYSCFSFRKLWAFTGPGFLMSIAYLDPGNIESDLQSGAVAGFKLLWVLMLATIVGLLLQRLAARLGVVTGLHLAEVCYRQYPKVPRIILWLMVECAIIGSDMQEVIGSAIAINLLSMGRVPLWGGVLITIADTFLFLFLDKYGLRKLEAFFGFLITIMGLTFGYEYITVKPSQTQVLRGLFVPSCSGCNISQIQQAVGIVGAIIMPHNMYLHSALVKSRQVNRANKQEVREANKYFFVESCIALFVSFIINIFVVSVFAEAFFGKTNGQVAQTCENSSISWINTIFPHDNSTLTVDIYKGGVVLGCYFGPAALYIWAVGILAAGQSSTMTGTYSGQFVME…
XP_011598602.1	MPKKYTLKQSSPSCELANVANLNHWKDSTMGNSDTDRKASYEDASGEHGEVVSTISSSRNPLQPPDTSSEEPFTTYFDNKIPIPEDETHSCFSFRKLWAFTGPGFLMSIAYLDPGNIESDLQSGAVAGFKLLWVLMLATIIGLLLQRLAARLGVVTGLHLAEVCNRQYQKVPRIILWLMVELAIIGSDMQEVIGSAIAINLLSVGKIPLWGGVLITIADTFVFLFLDKYGLRKLEAFFGFLITIMALTFGYEYITVKPSQEKLLKGLFIPYCQNCGTTQLEQAVGIVGAVIMPHNMYLHSALVKSRQVNRANKREVREANKYFFIESCIALFVSFIINIFVVTVFAEAFFEKTNADVNGVCMNASSPHSSLFPNNNETLEVDIYKGGVVLGCYFGPAAL…
XP_029892904.1	MLLPAEPPLLTLAGPPSPPRSPPAAPGSGSAWCRSRTPVSLPSCLKLPRERERSGNNMPKKYTLKQSSPSCELANVANLNHWKDSTMGNSDTDRKASYEDASGEHGEVVSTISSSRNPLQPPDTSSEEPFTTYFDNKIPIPEDETHSCFSFRKLWAFTGPGFLMSIAYLDPGNIESDLQSGAVAGFKLLWVLMLATIIGLLLQRLAARLGVVTGLHLAEVCNRQYQKVPRIILWLMVELAIIGSDMQEVIGSAIAINLLSVGKIPLWGGVLITIADTFVFLFLDKYGLRKLEAFFGFLITIMALTFGYEYITVKPSQEKLLKGLFIPYCQNCGTTQLEQAVGIVGAVIMPHNMYLHSALVKSRQVNRANKREVREANKYFFIESCIALFVSFIINIFVV…
XP_010566823.1	MPKKYTLKQSSPSCELANVANLNHWKDSTMGNSDTDRKASYEDASGEHGEVISTISSSRNPLQPPDTSSEEPFTTYFDNKIPIPEDETHSCFSFRKLWAFTGPGFLMSIAYLDPGNIESDLQSGAVAGFKLLWVLMLATIIGLLLQRLAARLGVVTGLHLAEVCNRQYQKVPRIILWLMVELAIIGSDMQEVIGSAIAINLLSVGKIPLWGGVLITIADTFVFLFLDKYGLRKLEAFFGFLITIMALTFGYEYITVKPSQEKLLKGLFIPYCQNCGTTQLEQAVGIVGAVIMPHNMYLHSALVKSRQVNRANKREVQEANKYFFIESCIALFVSFIINIFVVTVFAEAFFEKTNADVNGVCMNASSPHSSLFPNNNETLEVDIYKGGVVLGCYFGPAAL…
XP_011598601.1	MKARSLAAPPSSVNPWGCFCQPSPLSSLWLDPRAPPVPSSSPRKRECVVPVTHARVFALLPANVANLNHWKDSTMGNSDTDRKASYEDASGEHGEVVSTISSSRNPLQPPDTSSEEPFTTYFDNKIPIPEDETHSCFSFRKLWAFTGPGFLMSIAYLDPGNIESDLQSGAVAGFKLLWVLMLATIIGLLLQRLAARLGVVTGLHLAEVCNRQYQKVPRIILWLMVELAIIGSDMQEVIGSAIAINLLSVGKIPLWGGVLITIADTFVFLFLDKYGLRKLEAFFGFLITIMALTFGYEYITVKPSQEKLLKGLFIPYCQNCGTTQLEQAVGIVGAVIMPHNMYLHSALVKSRQVNRANKREVREANKYFFIESCIALFVSFIINIFVVTVFAEAFFEKTN…
XP_010566824.1	MPKKYTLKQSSPSCELANVANLNHWKDSTMGNSDTDRKASYEDASGEHGEVISTISSSRNPLQPPDTSSEEPFTTYFDNKIPIPEDETHSCFSFRKLWAFTGPGFLMSIAYLDPGNIESDLQSGAVAGFKLLWVLMLATIIGLLLQRLAARLGVVTGLHLAEVCNRQYQKVPRIILWLMVELAIIGSDMQEVIGSAIAINLLSVGKIPLWGGVLITIADTFVFLFLDKYGLRKLEAFFGFLITIMALTFGYEYITVKPSQEKLLKGLFIPYCQNCGTTQLEQAVGIVGAVIMPHNMYLHSALVKSRQVNRANKREVQEANKYFFIESCIALFVSFIINIFVVTVFAEAFFEKTNADVNGVCMNASSPHSSLFPNNNETLEVDIYKGGVVLGCYFGPAAL…
XP_011598603.1	MGNSDTDRKASYEDASGEHGEVVSTISSSRNPLQPPDTSSEEPFTTYFDNKIPIPEDETHSCFSFRKLWAFTGPGFLMSIAYLDPGNIESDLQSGAVAGFKLLWVLMLATIIGLLLQRLAARLGVVTGLHLAEVCNRQYQKVPRIILWLMVELAIIGSDMQEVIGSAIAINLLSVGKIPLWGGVLITIADTFVFLFLDKYGLRKLEAFFGFLITIMALTFGYEYITVKPSQEKLLKGLFIPYCQNCGTTQLEQAVGIVGAVIMPHNMYLHSALVKSRQVNRANKREVREANKYFFIESCIALFVSFIINIFVVTVFAEAFFEKTNADVNGVCMNASSPHSSLFPNNNETLEVDIYKGGVVLGCYFGPAALYIWAIGILAAGQSSTMTGTYSGQFVMEGF…
XP_010566825.1	MGNSDTDRKASYEDASGEHGEVISTISSSRNPLQPPDTSSEEPFTTYFDNKIPIPEDETHSCFSFRKLWAFTGPGFLMSIAYLDPGNIESDLQSGAVAGFKLLWVLMLATIIGLLLQRLAARLGVVTGLHLAEVCNRQYQKVPRIILWLMVELAIIGSDMQEVIGSAIAINLLSVGKIPLWGGVLITIADTFVFLFLDKYGLRKLEAFFGFLITIMALTFGYEYITVKPSQEKLLKGLFIPYCQNCGTTQLEQAVGIVGAVIMPHNMYLHSALVKSRQVNRANKREVQEANKYFFIESCIALFVSFIINIFVVTVFAEAFFEKTNADVNGVCMNASSPHSSLFPNNNETLEVDIYKGGVVLGCYFGPAALYIWAIGILAAGQSSTMTGTYSGQFVMEGF…
XP_009924493.1	MGNSDTDRKASYEDASGEHGEVISTISSSRNPLQPPDTSSEEPFTTYFDNKIPIPEDETHSCFSFRKLWAFTGPGFLMSIAYLDPGNIESDLQSGAVAGFKLLWVLMLATIIGLLRQRLAARLGVVTGLHLAEVCNRQYQKVPRIILWLMVELAIIGSDMQEVIGSAIAINLLSVGKIPLWGGVLITIADTFVFLFLDKYGLRKLEAFFGFLITIMALTFGYEYITVKPSQEKLLKGLFIPYCQNCGTTQLEQAVGIVGAVIMPHNMYLHSALVKSRQVNRANKREVQEANKYFFIESCIALFVSFIINIFVVTVFAEAFFEKTNADVNGVCMNASSPHSSLFPNNNETLEVDIYKGGVVLGCYFGPAALYIWAIGILAAGQSSTMTGTYSGQFVMEGF…
XP_009924513.1	MGNSDTDRKASYEDASGEHGEVISTISSSRNPLQPPDTSSEEPFTTYFDNKIPIPEDETHSCFSFRKLWAFTGPGFLMSIAYLDPGNIESDLQSGAVAGFKLLWVLMLATIIGLLRQRLAARLGVVTGLHLAEVCNRQYQKVPRIILWLMVELAIIGSDMQEVIGSAIAINLLSVGKIPLWGGVLITIADTFVFLFLDKYGLRKLEAFFGFLITIMALTFGYEYITVKPSQEKLLKGLFIPYCQNCGTTQLEQAVGIVGAVIMPHNMYLHSALVKSRQVNRANKREVQEANKYFFIESCIALFVSFIINIFVVTVFAEAFFEKTNADVNGVCMNASSPHSSLFPNNNETLEVDIYKGGVVLGCYFGPAALYIWAIGILAAGQSSTMTGTYSGQFVMEGF…
XP_011598605.1	MPRRESKKDASGEHGEVVSTISSSRNPLQPPDTSSEEPFTTYFDNKIPIPEDETHSCFSFRKLWAFTGPGFLMSIAYLDPGNIESDLQSGAVAGFKLLWVLMLATIIGLLLQRLAARLGVVTGLHLAEVCNRQYQKVPRIILWLMVELAIIGSDMQEVIGSAIAINLLSVGKIPLWGGVLITIADTFVFLFLDKYGLRKLEAFFGFLITIMALTFGYEYITVKPSQEKLLKGLFIPYCQNCGTTQLEQAVGIVGAVIMPHNMYLHSALVKSRQVNRANKREVREANKYFFIESCIALFVSFIINIFVVTVFAEAFFEKTNADVNGVCMNASSPHSSLFPNNNETLEVDIYKGGVVLGCYFGPAALYIWAIGILAAGQSSTMTGTYSGQFVMEGFLNLRW…
XP_009282521.1	MPKKYTLKPSSPGCELADVANLNQFPGHWKGSTMGNSDTDQKASYEDASGEHGEAVSTISSSMNPLQPPDASSSEPFTTYFDSKIPIPEDETHSCFSFRKLWAFTGPGFLMSIAYLDPGNIESDLQSGAVAGFKLLWVLMLATIIGLLLQRLAARLGVVTGLHLAEVCHRQYQKVPRIILWLMVELAIIGSDMQEVIGSAIAINLLSVGKIPLWGGVLITIADTFVFLFLDKYGLRKLEAFFGFLITIMALTFGYEYITVKPDQEKLLKGLFIPYCQNCGTPQLEQAVGIVGAVIMPHNMYLHSALVKSRQVNRANKREVREANKYFFIESCIALFVSFIINIFVVTVFAEAFFEKTNADVSDVCVNASSPHSSLFPNNNQTLEVDIYKGGVVLGCYFG…
XP_009880724.1	MPKKYTLKQSSPSCELAKVANLNQFPGHRKGSTMGNSDTDQKASYEDASGDHGDIVSTISSSMNPLQPPDASSEEPFTTYFDSKIPIPEDETHSCFSFRKLWAFTGPGFLMSIAYLDPGNIESDLQSGAVAGFKLLWVLMLSTIIGLLLQRLAARLGVVTGLHLAEVCNRQYQKVPRIILWLMVELAIIGSDMQEVIGSAIAINLLSVGKIPLWGGVLITIADTFVFLFLDKYGLRKLEAFFGLLITIMALTFGYEYITVKPDQEKLLQGLFIPYCQNCGTAQLEQAVGIVGAVIMPHNMYLHSALVKSRQVNRANKREVQEANKYFFIESCIALFVSFIINIFVVTVFAEAFFAKTNADVNAVCVNASSPHSSLFPNNNQTLEVDIYKGGAVLGCYFG…
XP_009319204.1	MGNSDTDQKASYEDASGEHGEVVSTISSSMNPLQPPDDASSEEPFTTYFDSKIPIPEDETHSCFSFRKLWAFTGPGFLMSIAYLDPGNIESDLQSGAVAGFKLLWVLMLATIIGLLLQRLAARLGVVTGLHLAEVCNRQYQKVPRIILWLMVELAIIGSDMQEVIGSAIAINLLSVGKIPLWGGVLITIADTFVFLFLDKYGLRKLEAFFGFLITIMALTFGYEYITVKPDQEKLLKGLFIPYCQNCGTPQLEQAVGIVGAVIMPHNMYLHSALVKSRQVNRANKREVREANKYFFIESCIALFVSFIINIFVVTVFAEAFFEKTNADVSDVCVNASSPHSSLFPNNNQTLEVDIYKGGVVLGCYFGPAALYIWAIGILAAGQSSTMTGTYSGQFVMEG…
XP_009470688.1	MPKKYTLKQSSPSCELTNVANLNQFPGHGKGSTMGNSDVDQKASYEDGSGENGEVVSTISSSMNPLQPPDASSEEPFTTYFDSKIPIPDDETHSCFSFRKLWAFTGPGFLMSIAYLDPGNIESDLQSGAVAGFKLLWVLMLATIIGLLLQRLAARLGVVTGLHLAEVCNRQYQKVPRIILWLMVELAIIGSDMQEVIGSAIAINLLSVGKIPLWGGVLITIADTFMFLFLDKYGLRKLEAFFGFLITIMALTFGYEYITVKPNQEKLLKGLFIPYCQNCGTPQLEQAVGIVGAVIMPHNMYLHSALVKSRQVNRANKKEVREANKYFFIESCIALFVSFIINIFVVTVFAEAFFEKTNADVNNVCMNSSSPHSSLFPNNNQTLEVDIYKGGVVLGCYFG…
XP_014811197.1	MLFQDEVPLLPLARPQNPPDSSPGSWSAWCHSRTLVSLPSCLKPPWESNGDTMAKKDSLKESSGGCELTKVASLTQFPSHQKGSTMGNSDTEQKAPYEDASGDHGEMVNTISSSMNPLQPPDASSEEPFTTYFDSKIPIPEDETHSCFSFRKLWAFTGPGFLMSIAYLDPGNIESDLQSGAVAGFKLLWVLMLATIIGLLLQRLAARLGVVTGLHLAEVCNRQYQKVPRIILWLMVELAIIGSDMQEVIGSAIAINLLSMGKIPLWGGVLITIADTFVFLFLDKYGLRKLEAFFGFLITIMALTFGYEYITVRPDQGKLLQGLFIPYCKDCGTPQLEQAVGIVGAVIMPHNMYLHSALVKSRQVNRANKREVREANKYFFIESCIALFVSFIINIFVVT…
XP_014811198.1	MLFQDEVPLLPLARPQNPPDSSPGSWSAWCHSRTLVSLPSCLKPPWESNGDTMAKKDSLKESSGGCELTKVASLTQFPSHQKGSTMGNSDTEQKAPYDASGDHGEMVNTISSSMNPLQPPDASSEEPFTTYFDSKIPIPEDETHSCFSFRKLWAFTGPGFLMSIAYLDPGNIESDLQSGAVAGFKLLWVLMLATIIGLLLQRLAARLGVVTGLHLAEVCNRQYQKVPRIILWLMVELAIIGSDMQEVIGSAIAINLLSMGKIPLWGGVLITIADTFVFLFLDKYGLRKLEAFFGFLITIMALTFGYEYITVRPDQGKLLQGLFIPYCKDCGTPQLEQAVGIVGAVIMPHNMYLHSALVKSRQVNRANKREVREANKYFFIESCIALFVSFIINIFVVTV…
XP_014811199.1	MGNSDTEQKAPYEDASGDHGEMVNTISSSMNPLQPPDASSEEPFTTYFDSKIPIPEDETHSCFSFRKLWAFTGPGFLMSIAYLDPGNIESDLQSGAVAGFKLLWVLMLATIIGLLLQRLAARLGVVTGLHLAEVCNRQYQKVPRIILWLMVELAIIGSDMQEVIGSAIAINLLSMGKIPLWGGVLITIADTFVFLFLDKYGLRKLEAFFGFLITIMALTFGYEYITVRPDQGKLLQGLFIPYCKDCGTPQLEQAVGIVGAVIMPHNMYLHSALVKSRQVNRANKREVREANKYFFIESCIALFVSFIINIFVVTVFAEAFFNQTNADVHSICVNASSPHSSLFPNDNKTLEVDIYKGGAVLGCYFGPAALYIWAIGILAAGQSSTMTGTYSGQFVMEGF…
XP_014811200.1	MGNSDTEQKAPYDASGDHGEMVNTISSSMNPLQPPDASSEEPFTTYFDSKIPIPEDETHSCFSFRKLWAFTGPGFLMSIAYLDPGNIESDLQSGAVAGFKLLWVLMLATIIGLLLQRLAARLGVVTGLHLAEVCNRQYQKVPRIILWLMVELAIIGSDMQEVIGSAIAINLLSMGKIPLWGGVLITIADTFVFLFLDKYGLRKLEAFFGFLITIMALTFGYEYITVRPDQGKLLQGLFIPYCKDCGTPQLEQAVGIVGAVIMPHNMYLHSALVKSRQVNRANKREVREANKYFFIESCIALFVSFIINIFVVTVFAEAFFNQTNADVHSICVNASSPHSSLFPNDNKTLEVDIYKGGAVLGCYFGPAALYIWAIGILAAGQSSTMTGTYSGQFVMEGFL…
XP_014811201.1	MPRRESRKDASGDHGEMVNTISSSMNPLQPPDASSEEPFTTYFDSKIPIPEDETHSCFSFRKLWAFTGPGFLMSIAYLDPGNIESDLQSGAVAGFKLLWVLMLATIIGLLLQRLAARLGVVTGLHLAEVCNRQYQKVPRIILWLMVELAIIGSDMQEVIGSAIAINLLSMGKIPLWGGVLITIADTFVFLFLDKYGLRKLEAFFGFLITIMALTFGYEYITVRPDQGKLLQGLFIPYCKDCGTPQLEQAVGIVGAVIMPHNMYLHSALVKSRQVNRANKREVREANKYFFIESCIALFVSFIINIFVVTVFAEAFFNQTNADVHSICVNASSPHSSLFPNDNKTLEVDIYKGGAVLGCYFGPAALYIWAIGILAAGQSSTMTGTYSGQFVMEGFLNLRW…
XP_009572202.1	MGNFDTDQKASYEDASGEHGEAVSTISSSMNPLQLPDTSSEEPFTTYFDSKIPIPEDETHSCFSFRKLWAFTGPGFLMSIAYLDPGNIESDLQSGAVAGFKLLWVLMLATTIGLLLQRLAARLGVVTGLHLAEVCNRQYQKVPRIILWLMVELAIIGSDMQEVIGSAIAINLLSVGKIPLWGGVIITIADTFVFLFLDKYGLRKLEAFFGFLITIMALTFGYEYITVKPNQEKLLKGLFIPYCQNCGTSQLEQAVGIVGAVIMPHNMYLHSALVKSRQVNRANKREVQEANKYFFIESCIALFVSFIINIFVVTVFAEAFFEKTNADVNNVCTNASSPHSSLFPNNNQTLEVDIYKGGVVLGCYFGPAALYIWAIGILAAGQSSTMTGTYSGQFVMEGF…
XP_009484233.1	MGNSDTDQKASYEDASGEHGEVVSTISSSMNPLQPPDTSSEEPFTTYFDSKIPIPEDETHSCFSFRKLWAFTGPGFLMSIAYLDPGNIESDLQSGAVAGFKLLWVLMLATTIGLLRQRLAARLGVVTGLHLAEVCNRQYQKVPRIILWLMVELAIIGSDMQEVIGSAIAINLLSMGKIPLWGGVLITIADTFMFLFLDKYGLRKLEAFFGFLITIMALTFGYEYITVKPSQENLLKGLFIPYCQNCGTAQLEQAVGIVGAVIMPHNMYLHSALVKSRQVNRANKREVQEANKYFFIESCIALFVSFIINIFVVTVFAEAFFEKTNADVNNVCVNASSPHSSLFPNNNETLEVDIYKGGVVLGCYFGPAALYIWAIGILAAGQSSTMTGTYSGQFVMEGF…
XP_009686159.1	MPKKYTLKQSSPTCELANVANLNRFPEREKDSTMGPGTDRKVSYEDASGENGEVVSTISNSMNPLQSPDTSSEEPFTTYFDSKIPIPEDETHSCFSFRKLWAFTGPGFLMSIAYLDPGNIESDLQSGAVAGFKLLWVLMLATIIGLLLQRLAARLGVVTGLHLAEVCNRQYQKVPRIILWLMVELAIIGSDMQEVIGSAIAINLLSMGKIPLWGGVLITIADTFVFLFLDKYGLRKLEAFFGFLITIMALTFGYEYVTVKPDQGNLLKGLFVPYCQNCGTAQLEQAVGIVGAVIMPHNMYLHSALVKSRQVNRANKREVQEANKYFFIESCIALFVSFIINIFVVSVFAEAFFEKTNEDVSAVCTNASSPHSSLFPSNNQTLEVDIYKGGVVLGCYFGP…
XP_009686166.1	MPKKYTLKQSSPTCELANVANLNRFPEREKDSTMGPGTDRKVSYDASGENGEVVSTISNSMNPLQSPDTSSEEPFTTYFDSKIPIPEDETHSCFSFRKLWAFTGPGFLMSIAYLDPGNIESDLQSGAVAGFKLLWVLMLATIIGLLLQRLAARLGVVTGLHLAEVCNRQYQKVPRIILWLMVELAIIGSDMQEVIGSAIAINLLSMGKIPLWGGVLITIADTFVFLFLDKYGLRKLEAFFGFLITIMALTFGYEYVTVKPDQGNLLKGLFVPYCQNCGTAQLEQAVGIVGAVIMPHNMYLHSALVKSRQVNRANKREVQEANKYFFIESCIALFVSFIINIFVVSVFAEAFFEKTNEDVSAVCTNASSPHSSLFPSNNQTLEVDIYKGGVVLGCYFGPA…
XP_009686175.1	MPRRGSKKDASGENGEVVSTISNSMNPLQSPDTSSEEPFTTYFDSKIPIPEDETHSCFSFRKLWAFTGPGFLMSIAYLDPGNIESDLQSGAVAGFKLLWVLMLATIIGLLLQRLAARLGVVTGLHLAEVCNRQYQKVPRIILWLMVELAIIGSDMQEVIGSAIAINLLSMGKIPLWGGVLITIADTFVFLFLDKYGLRKLEAFFGFLITIMALTFGYEYVTVKPDQGNLLKGLFVPYCQNCGTAQLEQAVGIVGAVIMPHNMYLHSALVKSRQVNRANKREVQEANKYFFIESCIALFVSFIINIFVVSVFAEAFFEKTNEDVSAVCTNASSPHSSLFPSNNQTLEVDIYKGGVVLGCYFGPAALYIWAIGILAAGQSSTMTGTYSGQFVMEGFLNLRW…
XP_025934032.1	MYRANVANLNRFPSHGKDSTMAPGTDRKASYEDASGESEEVVSTISNSMNPLQSPDASSEEPFTTYFDSKIPIPEDETHSCFSFRKLWAFTGPGFLMSIAYLDPGNIESDLQSGAIAGFKLLWVLMLATIIGLLLQRLAARLGVVTGLHLAEVCNRQYQKVPRIILWLMVELAIIGSDMQEVIGSAIAMNLLSVGKIPLWGGVLITIADTFVFLFLDKYGLRKLEALFGFLITIMALTFGYEYVTVKPDQGNLLKGLFVPYCQNCGTPQLEQAVGIVGAVIMPHNMYLHSALVKSRQVNRANKREVQEANKYFFIESCIALFVSFIINIFVVSVFAEAFFEKTNENVSAVCTNASSPHSSLFPNNNQTLEVDIYKGGVVLGCYFGPAALYIWAIGILAA…
XP_025934033.1	MAPGTDRKASYEDASGESEEVVSTISNSMNPLQSPDASSEEPFTTYFDSKIPIPEDETHSCFSFRKLWAFTGPGFLMSIAYLDPGNIESDLQSGAIAGFKLLWVLMLATIIGLLLQRLAARLGVVTGLHLAEVCNRQYQKVPRIILWLMVELAIIGSDMQEVIGSAIAMNLLSVGKIPLWGGVLITIADTFVFLFLDKYGLRKLEALFGFLITIMALTFGYEYVTVKPDQGNLLKGLFVPYCQNCGTPQLEQAVGIVGAVIMPHNMYLHSALVKSRQVNRANKREVQEANKYFFIESCIALFVSFIINIFVVSVFAEAFFEKTNENVSAVCTNASSPHSSLFPNNNQTLEVDIYKGGVVLGCYFGPAALYIWAIGILAAGQSSTMTGTYSGQFVMEGFL…
XP_025969724.1	MRKKYTLEQSSPACELANVANLNQFPSHRKDSTMAPGTDRKASYEDASGENGEVVSTISNSMNPLQSPDASSEDPFTTYFDSKIPIPEGETHSCFSFRKLWAFTGPGFLMSIAYLDPGNIESDLQSGAVAGFKLLWVLMLATIIGLLLQRLAARLGVVTGLHLAEVCNRQYQKVPRIILWLMVELAIIGSDMQEVIGSAIAINLLSMGKIPLWGGVLITIADTFVFLFLDKYGLRKLEAFFGFLITVMALTFGYEYVTVKPDQKNLLKGLFIPYCQNCGTPQLEQAVGIVGAVIMPHNMYLHSALVKSRQVNRANKREVQEANKYFFIESCIALFVSFIINIFVVSVFAEAFFEKTNENVSAVCMNASSPHSSLFPNNNETLEVDIYKGGVVLGCYFGP…
XP_025969725.1	MAPGTDRKASYEDASGENGEVVSTISNSMNPLQSPDASSEDPFTTYFDSKIPIPEGETHSCFSFRKLWAFTGPGFLMSIAYLDPGNIESDLQSGAVAGFKLLWVLMLATIIGLLLQRLAARLGVVTGLHLAEVCNRQYQKVPRIILWLMVELAIIGSDMQEVIGSAIAINLLSMGKIPLWGGVLITIADTFVFLFLDKYGLRKLEAFFGFLITVMALTFGYEYVTVKPDQKNLLKGLFIPYCQNCGTPQLEQAVGIVGAVIMPHNMYLHSALVKSRQVNRANKREVQEANKYFFIESCIALFVSFIINIFVVSVFAEAFFEKTNENVSAVCMNASSPHSSLFPNNNETLEVDIYKGGVVLGCYFGPAALYIWAIGILAAGQSSTMTGTYSGQFVMEGFL…
XP_025969728.1	MPRRGSKKDASGENGEVVSTISNSMNPLQSPDASSEDPFTTYFDSKIPIPEGETHSCFSFRKLWAFTGPGFLMSIAYLDPGNIESDLQSGAVAGFKLLWVLMLATIIGLLLQRLAARLGVVTGLHLAEVCNRQYQKVPRIILWLMVELAIIGSDMQEVIGSAIAINLLSMGKIPLWGGVLITIADTFVFLFLDKYGLRKLEAFFGFLITVMALTFGYEYVTVKPDQKNLLKGLFIPYCQNCGTPQLEQAVGIVGAVIMPHNMYLHSALVKSRQVNRANKREVQEANKYFFIESCIALFVSFIINIFVVSVFAEAFFEKTNENVSAVCMNASSPHSSLFPNNNETLEVDIYKGGVVLGCYFGPAALYIWAIGILAAGQSSTMTGTYSGQFVMEGFLNLRW…
XP_025900854.1	MGPGADRKASYEDSSGENGEVVSTISSSMNPLQPPDASSEEPFTTYFBSKIPIPEDETHSCFSFRKLWAFTGPGFLMSIAYLDPGNIESDLQSGAVAGFKLLWVLLLATIIGLLLQRLAARLGVVTGLHLAEVCNRQYRKVPRIILWLMVELAIIGSDMQEVIGSAIALNLLSMGKIPLWGGVLITIADTFVFLFLDKYGLRKLEAFFGFLITIMAITFGYEYVTVKPDQGSLLKGLFVPYCQNCGTAQLEQAVGIVGAVIMPHNMYLHSALVKSRQVNRANKREVKEANKYFFIESCIALFISFIINIFVVSVFAEAFFEKTNANVSAVCANASSPHSSLFPSNNETLEVDIYKGGVVLGCYFGPAALYIWAIGILAAGQSSTMTGTYSGQFVMEGFL…
XP_010304578.1	MGNSDTDQKASYEDASGEHGDIISTISSSMNPLQPPDASSEEPFTTYFDSKIPIPEDETHSCFSFRKLWAFTGPGFLMSIAYLDPGNIESDLQSGAVAGFKLLWVLMLATIIGLLLQRLAARLGVVTGLHLAEVCNRQYQKVPRIILWLMVELAIIGSDMQEVIGSAIAINLLSVGKIPLWGGVLITIADTFVFLFLDKYGLRKLEAFFGFLITIMALTFGYEYITVKPDQGKLLKGLFIPYCQNCGTPQLEQAVGIVGAVIMPHNMYLHSALVKSRQVNRANKREVREANKYFFIESCIALFVSFIINIFVVTVFAEAFFEKTNADVNNVCTNASSPHSSLFPNNNQTLEVDIYKGGVVLGCYFGPAALYIWAIGILAAGQSSTMTGTYSGQFVMEGF…
XP_027636413.1	MPKKYTLQQSSPSCELANVASLNQFPGQGNGPSMGNSDTDHKASYEDAPGEHGDVLSTISSSMNPLQPPAAAEEPFTTYFDSKIPIPEDETHSGFSFRKLWAFTGPGFLMSIAYLDPGNIESDLQSGAVAGFKLLWVLLLATVIGLLLQRLAARLGVVTPSPGVPRIILWLMVELAIIGSDMQEVIGSAIAINLLSMGKIPLWGGVLITIADTFVFLFLDKYGLRKLEAFFGFLITIMALTFGYEYITVKPSQEKLLQGLFIPYCQNCGTEQLEQAVGIVGAVIMPHNMYLHSALVKSRQVNRANKREVQEANKYFFIESCIALFVSFIINIFVVTVFAEAFFEKTNADVSDVCRNASSPHSSLFPSDNQTLQVDIYKGGVVLGCYFGPAALYIWAIGI…
XP_027666993.1	MLSPPRGRDKAVHQSLQKPPTARSRNTMPKKYTLQQSSPSCELANVASLNQFPGQGNGPSMGNSDTDHKASYEDAPGEHGDVLSTISSSMNPLQPPAAAEEPFTTYFDSKIPIPEDETVSCFSFRKLWAFTGPGFLMSIAYLDPGNIESDLQSGAVAGFKVGRLEITLAKLSNNSSQTQWNLGALAVPYGLFLCLEVPRIILWLMVELAIIGSDMQEVIGSAIAINLLSMGKIPLWGGVLITIADTFVFLFLDKYGLRKLEAFFGFLITIMALTFGYEYITVKPSQEKLLQGLFIPYCQNCGTEQLEQAVGIVGAVIMPHNMYLHSALVKSRQVNRANKREVQEANKYFFIESCIALFVSFIINIFVVTVFAEAFFEKTNADVSDVCRNASSPHSSLFP…
XP_030366485.1	MPKRYNLELADVANVKQAPDNWKGSTMGSSDMDQKASYEDASREPGEVVSTISSSMNPLQPPDTSSEEPFTTYFDSKIPIPEDEKQSCFSFRKLWAFTGPGFLMSIAYLDPGNIESDLQSGAVAGFKLLWVLMLATLIGLLLQRLAARLGVVTGLHLAEVCNRQYQKVPRIVLWLMVELAIIGSDMQEVIGSAIAINLLSMGKIPLWGGVLITIADTFVFLFLDKYGLRKLEAFFGFLITIMALTFGYEYITVRPNQEKLLKGLFVPYCQDCGTPQLEQAVGIVGAVIMPHNMYLHSALVKSRQVNRANKREVREANKYFFIESCIALFVSFIINIFVVTVFAEAFFEKNNADVNTVCINASSPHSSLFPNNNQTLEVDIYKGGVVLGCYFGPAALYIW…
XP_030366486.1	MGSSDMDQKASYEDASREPGEVVSTISSSMNPLQPPDTSSEEPFTTYFDSKIPIPEDEKQSCFSFRKLWAFTGPGFLMSIAYLDPGNIESDLQSGAVAGFKLLWVLMLATLIGLLLQRLAARLGVVTGLHLAEVCNRQYQKVPRIVLWLMVELAIIGSDMQEVIGSAIAINLLSMGKIPLWGGVLITIADTFVFLFLDKYGLRKLEAFFGFLITIMALTFGYEYITVRPNQEKLLKGLFVPYCQDCGTPQLEQAVGIVGAVIMPHNMYLHSALVKSRQVNRANKREVREANKYFFIESCIALFVSFIINIFVVTVFAEAFFEKNNADVNTVCINASSPHSSLFPNNNQTLEVDIYKGGVVLGCYFGPAALYIWAIGILAAGQSSTMTGTYSGQFAMEGF…
XP_010212844.1	MPKKYTLKQSSPACELANVANLNQFPSHGKDSTMGPGAERKASYEDASGENGEAVSTISSSMNPLQPPDASSEEPFTTYFDSKIPIPEDETHSCFSFRKLWAFTGPGFLMSIAYLDPGNIESDLQSGAVAGFKLLWVLLLATLIGLLLQRLAARTGNXILAEVCHRQYPKVPRIILWLMVELAIIGSDMQEVIGSAIALNLLSMGKIPLWGGVLITIADTFVFLFLDKYGLRKLEAFFGFLITIMAITFGYEYVTVKPDQGSLLKGLFVPYCQNCGTAQLEQAVGIVGAVIMPHNMYLHSALVKSRQVNRSNKREVQEANKYFFIESCIALFVSFIINIFVVSVFAEAFFDKTNEDVSAVCVNASSPHSSLFPSDNRTLEVDIYKGGVVLGCYFGPAAL…
XP_017694913.1	MGSSDMERKASYEDVSGEPGGLGGVVSTISSSRSPLQPPEDTEEEPFTTYFDSKIPIPEDETHSCFSFRKLWAFTGPGFLMSIAYLDPGNIESDLQSGAVAGFKLLWVLLLATVIGLLLQRLAARLGVVTGLHLAEVCHRQYHKFPRIILWLMVELAIIGSDMQEVIGSAIAINLLSVGKIPLWGGVLITIADTFVFLFLDKYGLRKLEAFFGFLITIMALTFGYEYITVKPNQEKVLQGLFIPYCKDCGTPQLEQAVGIVGAVIMPHNMYLHSALVKSRQVDRSNKRQVREANKYFFIESCIALFVSFIINIFVVAVFAEAFFNKTNADVNQVCVNSSSPHSSLFPNNNETLEVDIYKGGVVLGCYFGPAALYIWAIGILAAGQSSTMTGTYSGQFVM…
XP_027569782.1	MGSSDMERKASYEDVSGEPRGLGGVVSTISSSRSPLQPPEDTEEEPFTTYFDSKIPIPEDETHSCFSFRKLWAFTGPGFLMSIAYLDPGNIESDLQSGAVAGFKLLWVLLLATVIGLLLQRLAARLGVVTGLHLAEVCHRQYHKFPRIILWLMVELAIIGSDMQEVIGSAIAINLLSVGKIPLWGGVLITIADTFVFLFLDKYGLRKLEAFFGFLITIMALTFGYEYITVKPNQEKVLQGLFIPYCKDCGTPQLEQAVGIVGAVIMPHNMYLHSALVKSRQVDRSNKRQVREANKYFFIESCIALFVSFIINIFVVAVFAEAFFNKTNADVNQVCVNSSSPHSSLFPNNNETLEVDIYKGGVVLGCYFGPAALYIWAIGILAAGQSSTMTGTYSGQFVM…
XP_017694912.1	MSRGESGRESRTGSENRIGKDVSGEPGGLGGVVSTISSSRSPLQPPEDTEEEPFTTYFDSKIPIPEDETHSCFSFRKLWAFTGPGFLMSIAYLDPGNIESDLQSGAVAGFKLLWVLLLATVIGLLLQRLAARLGVVTGLHLAEVCHRQYHKFPRIILWLMVELAIIGSDMQEVIGSAIAINLLSVGKIPLWGGVLITIADTFVFLFLDKYGLRKLEAFFGFLITIMALTFGYEYITVKPNQEKVLQGLFIPYCKDCGTPQLEQAVGIVGAVIMPHNMYLHSALVKSRQVDRSNKRQVREANKYFFIESCIALFVSFIINIFVVAVFAEAFFNKTNADVNQVCVNSSSPHSSLFPNNNETLEVDIYKGGVVLGCYFGPAALYIWAIGILAAGQSSTMTGT…
XP_027569781.1	MSRGESGRESRTGSENRIGKDVSGEPRGLGGVVSTISSSRSPLQPPEDTEEEPFTTYFDSKIPIPEDETHSCFSFRKLWAFTGPGFLMSIAYLDPGNIESDLQSGAVAGFKLLWVLLLATVIGLLLQRLAARLGVVTGLHLAEVCHRQYHKFPRIILWLMVELAIIGSDMQEVIGSAIAINLLSVGKIPLWGGVLITIADTFVFLFLDKYGLRKLEAFFGFLITIMALTFGYEYITVKPNQEKVLQGLFIPYCKDCGTPQLEQAVGIVGAVIMPHNMYLHSALVKSRQVDRSNKRQVREANKYFFIESCIALFVSFIINIFVVAVFAEAFFNKTNADVNQVCVNSSSPHSSLFPNNNETLEVDIYKGGVVLGCYFGPAALYIWAIGILAAGQSSTMTGT…
XP_017694915.1	MSRGESGRESRTGSENRIGKDVSGEPGGLGGVVSTISSSRSPLQPPEDTEEEPFTTYFDSKIPIPEDETHSCFSFRKLWAFTGPGFLMSIAYLDPGNIESDLQSGAVAGFKLLWVLLLATVIGLLLQRLAARLGVVTGLHLAEVCHRQYHKFPRIILWLMVELAIIGSDMQEVIGSAIAINLLSVGKIPLWGGVLITIADTFVFLFLDKYGLRKLEAFFGFLITIMALTFGYEYITVKPNQEKVLQGLFIPYCKDCGTPQLEQAVGIVGAVIMPHNMYLHSALVKSRQVDRSNKRQVREANKYFFIESCIALFVSFIINIFVVAVFAEAFFNKTNADVNQVCVNSSSPHSSLFPNNNETLEVDIYKGGVVLGCYFGPAALYIWAIGILAAGQSSTMTGT…
XP_029814718.1	MSRGESGRESRTGSENRIGKDVSGEPGGLGGVVSTISSSRSPLQPPEDTEEEPFTTYFDSKIPIPEDETHSCFSFRKLWAFTGPGFLMSIAYLDPGNIESDLQSGAVAGFKLLWVLLLATVIGLLLQRLAARLGVVTGLHLAEVCHRQYHKFPRIILWLMVELAIIGSDMQEVIGSAIAINLLSVGKIPLWGGVLITIADTFVFLFLDKYGLRKLEAFFGFLITIMALTFGYEYITVKPNQEKVLQGLFIPYCKDCGTPQLEQAVGIVGAVIMPHNMYLHSALVKSRQVDRSNKRQVRDANKYFFIESCIALFVSFIINIFVVAVFAEAFFNKTNADVNQVCVNSSSPHSSLFPNNNETLEVDIYKGGVVLGCYFGPAALYIWAIGILAAGQSSTMTGT…
TRZ11737.1	MPTKPVPGCELANVSSVKKSPEQGKGSTMGNSDMERKASYEDVSGESGGVVSTISSSRSPLQPPDADDGEPFTTYFDSKIPIPEDETHSCFSFRKLWAFTGPGFLMSIAYLDPGNIESDLQSGAVAGFKLLWVLMLATIIGLLLQRLAARLGVVTGLHLAEVCNRQYQKFPRIILWLMVELAIIGSDMQEVIGSAIAINLLSVGKIPLWGGVLITIADTFVFLFLDKYGLRKLEAFFGLLITIMALTFGYEYITVKPDQKQLLQGLFIPYCKGCGTPQLEQAVGIVGAVIMPHNMYLHSALVKSRQVNRADKREVREANKYFFIESCIALFVSFIINIFVVTVFAQAFFNQTNADVNKVCANSSIPHSALFPNNNETLEVDIYKGGVVLGCYFGPAALY…
XP_014116126.1	MGNLDMERKASYEDVSGEPGGLGGVVSTISSSRSPLQPPDTDEGEPFTTYFDSKIPIPDDETHSXXXXFSFRKLWAFTGPGFLMSIAYLDPGNIESDLQSGAVAGFKLLWVLLLATVIGLLLQRLAARLGVVTGLHLAEVCNRQYQKFPRIILWLMVELAIIGSDMQEVIGSAIAINLLSVGKIPLWGGVLITIADTFVFLFLDKYGLRKLEAFFGFLITIMALTFGYEYITVKPNQEKLLQGLFIPYCKDCGTPQLEQAVGIVGAVIMPHNMYLHSALVKSRQVNRADKREVREANKYFFIESCIALFVSFIINIFVVTVFAEAFFNKTNADVHQVCANSSSPHSSLFPNNNETLEVDIYKGGVVLGCYFGPAALYIWAIGILAAGQSSTMTGTYSGQ…
RMB90583.1	MPTKSIPACELANVSGVKRFPEQTKSSSMGSSDVERKESYEDVSGEPGGLVSTISSSRSPLQPPDADDGEPFTTYFDSKIPIPEDDGHSCFSFRKLWAFTGPGFLMSIAYLDPGNIESDLQSGAVAGFKLLWVLLLATVIGLLLQRLAARLGVVTGLHLAEVCHRQYQKFPRIILWLMVELAIIGSDMQEVIGSAIAINLLSVGKIPLWGGVLITIADTFVFLFLDKYGLRKLEAFFGLLITIMALTFGYEYVTVKPSQKKLLQGLFVPYCGGCGTPQLEQAVGIVGAVIMPHNMYLHSALVKSRQVNRADKREVREANKYFFIESCIALFVSFIINIFVVTVFAEAFYNKSNANVSQVCANSSIPHSAVFPNTTDALEVDIYKGGVVLGCYFGPAALY…
RMB88190.1	MPTKSIPACELANVSGVKRFPEQTKSSSMGSSDVERKESYEDVSGEPGGLVSTISSSRSPLQPPDADDGEPFTTYFDSKIPIPEDDGHSCFSFRKLWAFTGPGFLMSIAYLDPGNIESDLQSGAVAGFKLLWVLLLATVIGLLLQRLAARLGVVTGLHLAEVCHRQYQKFPRIILWLMVELAIIGSDMQEVIGSAIAINLLSVGKGLELWVRSEPALARRIPLWGGVLITIADTFVFLFLDKYGLRKLEAFFGLLITIMALTFGYEYVTVKPSQKKLLQGLFVPYCGGCGTPQLEQAVGIVGAVIMPHNMYLHSALVKSRQVNRADKREVREANKYFFIESCIALFVSFIINIFVVTVFAEAFYNKSNANVSQVCANSSIPHSAVFPNTTDALEVDIYK…
XP_009700428.1	MRTSDTDQKASYEDASGEHGEVVSTISSSMNPLQPPDASSEEPFTTYFDSKIPIPEDETHSCFSFRKLWAFTGPGFLMSIAYLDPGNIESDLQSGAVAGFKLLWVLMLATIIGLLLQRLAARLGVVTGLHLAEVCNRQYQKVPRIILWLMVELAIIGSDMQEVIGSAIAINLLSVGKIPLWGGVLITIADTFVFLFLDKYGLRKLEAFFGFLITIMALTFGYEYITVKPNQEKLLKGLFIPYCQNCGTRQLEQAVGIVGAVIMPHNMYLHSALVKSRQVNRANKKEVREANKYFFIESCIALFVSFIINIFVVTVFAEAFFEKTNADVNEVCVNTSSPHSSLFPNNNETLEVDIYKGGVVLGCYFGPAALYIWAIGILAAGQSSTMTGTYSGQFVMEGF…
XP_013056242.1	MFSAEAAAALLLDDSLLLALGCGSSMIPVTHRALFVDCLYKQPDPCQPAARPGHARFALQSLCQVSPVRFFTLSFLSPSAPPPEDGSGDGISTVSGSRNPLQPPDTSSEEPFTTYFDSKIPIPEDETHSCFSFRKLWAFTGPGFLMSIAYLDPGNIESDLQSGAVAGFKLLWVLLLATVIGLLLQRLAARLGVVTGLHLAEVCHRQYQKVPRIILWLMVELAIIGSDMQEVIGSAIAINLLSMGKIPLWGGVLITIADTFVFLFLDKYGLRKLEAFFGFLITIMALTFGYEYVTVKPDQEQLLKGLFIPYCQNCGTPQLEQAVGIVGAVIMPHNMYLHSALVKSRQVNRANKKEVREANKYFFIESCIALFVSFIINIFVVTVFAEAFFDKTNADVHEV…
XP_030822962.1	MERKTSYEEVSGEPGGLGGVLSTISSSRSPLQPPEAEEGEPFSTYFDSKIPIPEDETHSCFSFRKLWAFTGPGFLMSIAYLDPGNIESDLQSGAVAGFKLLWVLLLATIIGLLLQRLAARLGVVTGLHLAEVCHRQYRKVPRIILWLMVELAIIGSDMQEVIGPAIAINLLSVGRIPLWGGVLITIADTFVFLFLDKYGLRKLEAFFGLLITIMALTFGYEYITVKPSQEKLLRGLFIPYCQDCGTPQLEQAVGIVGAVIMPHNMYLHSALVKSRQVNRADKREVREANKYFFIESCIALFVSFIINIFVVTVFAEAFFDKTNANVSQVCANSSSPHSALFPNNSDALEVDIYKGGVVLGCYFGPAALYIWAIGILAAGQSSTMTGTYSGQFVMEGFLN…
XP_030115231.1	MGTERRASYEDVSGEPGGLGGVVSTISSSRSPLQPPDADDGEPFTTYFDSKIPIPEDETHSCFSFRKLWAFTGPGFLMSIAYLDPGNIESDLQSGAVAGFKLLWVLLLATVIGLLLQRLAARLGVVTGLHLAEVCHRQYQKVPRIILWLMVELAIIGSDMQEVIGSAIAINLLSVGKIPLWGGVLITIADTFVFLFLDKYGLRKLEAFFGLLISIMALTFGYEYITVKPSQEKLLQGLFVPYCQDCGTPQLEQAVGIVGAVIMPHNMYLHSALVKSRQVNRADKREVREANKYFFIESCIALFVSFIINIFVVTVFAEAFFNKTNAQVHQVCANASSPHAGLFPNDNSTLEVDIYKGGVVLGCSFGTAALYIWAIGILAAGQSSTMTGTYSGQFVMEGF…
XP_030115228.1	MGTERRASYEDVSGEPGGLGGVVSTISSSRSPLQPPDADDGEPFTTYFDSKIPIPEDETHSCFSFRKLWAFTGPGFLMSIAYLDPGNIESDLQSGAVAGFKLLWVLLLATVIGLLLQRLAARLGVVTGLHLAEVCHRQYQKVPRIILWLMVELAIIGSDMQEVIGSAIAINLLSVGKIPLWGGVLITIADTFVFLFLDKYGLRKLEAFFGLLISIMALTFGYEYITVKPSQEKLLQGLFVPYCQDCGTPQLEQAVGIVGAVIMPHNMYLHSALVKSRQVNRADKREVREANKYFFIESCIALFVSFIINIFVVTVFAEAFFNKTNAQVHQVCANASSPHAGLFPNDNSTLEVDIYKGGVVLGCSFGTAALYIWAIGILAAGQSSTMTGTYSGQFVMEGF…
XP_030115232.1	MGTERRASYEDVSGEPGGLGGVVSTISSSRSPLQPPDADDGEPFTTYFDSKIPIPEDETHSCFSFRKLWAFTGPGFLMSIAYLDPGNIESDLQSGAVAGFKLLWVLLLATVIGLLLQRLAARLGVVTGLHLAEVCHRQYQKVPRIILWLMVELAIIGSDMQEVIGSAIAINLLSVGKIPLWGGVLITIADTFVFLFLDKYGLRKLEAFFGLLISIMALTFGYEYITVKPSQEKLLQGLFVPYCQDCGTPQLEQAVGIVGAVIMPHNMYLHSALVKSRQVNRADKREVREANKYFFIESCIALFVSFIINIFVVTVFAEAFFNKTNAQVHQVCANASSPHAGLFPNDNSTLEVDIYKGGVVLGCSFGTAALYIWAIGILAAGQSSTMTGTYSGQFVMEGF…
XP_030115230.1	MGTERRASYEDVSGEPGGLGGVVSTISSSRSPLQPPDADDGEPFTTYFDSKIPIPEDETHSCFSFRKLWAFTGPGFLMSIAYLDPGNIESDLQSGAVAGFKLLWVLLLATVIGLLLQRLAARLGVVTGLHLAEVCHRQYQKVPRIILWLMVELAIIGSDMQEVIGSAIAINLLSVGKIPLWGGVLITIADTFVFLFLDKYGLRKLEAFFGLLISIMALTFGYEYITVKPSQEKLLQGLFVPYCQDCGTPQLEQAVGIVGAVIMPHNMYLHSALVKSRQVNRADKREVREANKYFFIESCIALFVSFIINIFVVTVFAEAFFNKTNAQVHQVCANASSPHAGLFPNDNSTLEVDIYKGGVVLGCSFGTAALYIWAIGILAAGQSSTMTGTYSGQFVMEGF…
XP_009810222.1	MGNSDTDQKASYEDASGEHGEVVSTISSSMNPLQPPDASSEEPFTTYFDNKIPIPEDETHSCFSFRKLWAFTGPGFLMSIAYLDPGNIESDLQSGAVAGFKLLWVLMLATIIARLLQRLAPXVTGLPLAEVCNRQYQKVPRIILWLMVELAIIGSDMQEVIGSAIAINLLSVGKIPLWGGVLITIADTFVFLFLDKYGLRKLEAFFGFLITIMALTFGYEYITVKPNQQKLLEGLFIPYCQNCGTAQLEQAVGIVGAVIMPHNMYLHSALVKSRQVNRANKREVREANKYFFIESCIALFVSFIINIFVVTVFAEAFFEKTNADVSNVCRNTSSPHSSLFPNNNQTLEVDIYKGGVVLGCYFGPAALYIWAIGILAAGQSSTMTGTYSGQFVMEGFLNL…
XP_010295570.1	MGNSDTDRKASYEDASGEHGEVVSTISSSMNPLQAPDASSEEPFTTYFDNKIPIPEDETHSCFSFRKLWAFTGPGFLMSIAYLDPGNIESDLQSGAVAGFKLLWVLMLATIIGLLLQRLAARLGVVTGLHLAEVCNRQYHKVPRIILWLMVELAIIGSDMQEVIGSAIAINLLSVGKIPLWGGVLITIADTFVFLFLDKYGLRKLEAFFGFLITIMALTFGYEYITVKPNQEKLLKGLFVPYCQNCGTTQLEQAVGIVGAVIMPHNMYLHSALVKSRQVNRANKREVREANKYFFIESCIALFVSFIINIFVVTVFAEAFFEKTNADVNGVCVNASSPHTSLFPNNNKTLEVDIYKGGVVLGCYFGPAALYIWAIGILAAGQSSTMTGTYSGQFVMEGF…
XP_009559909.1	MPKKYSAEQNGSGCELANVAKLNELPGQEKGSTMGNSNMDRKASYANVAKLNELPGQEKGSTMGNSNMDRKASYEDASGEQGEVISTISSSRNPLQPPDKIPIPEDETHSCFSFRKLWAFTGPGFLMSIAYLDPGNIESDLQSGAVAGFKLLWVLLLATVIGLLLQRLAARLGVVTGLHLAEVCNRQYQKVPRIILWLMVELAIIGSDMQEVIGSAIAINLLSMGKIPLWGGVLITIADTFVFLFLDKYGLRKLEAFFGFLITIMAVTFGYEYVTVKPDQEKLLKGLFIPYCQNCGTPQLEQAVGIVGAVIMPHNMYLHSALVKSRQVNRANKREVREANKYFFIESCIALFVSFIINIFVVTVFAEAFFEKTNADVNDVCANASSPHSSLFPNNTETL…
XP_027301245.1	MGRAQPRDRAGPVPPGPGPAGVTVTGTGCGHRGRREPKGAEGSRALPSRAAPNRAERLRGLRAQPKGAERLRGVRAERSRREPSAPEVSEPSAAERSRTAPSAAEPSGPEGSREFPNGSERCRTEPSGPERGRPGVGAAAGHEAAAAAGAAGGGRGANRTHLDPGHQEGSAMGTSDTDLRTPDEDGSMDGISTISGSRNPLQPADTSSEEPFTTYFDSKIPIPEDETHSCFSFRKLWAFTGPGFLMSIAYLDPGNIESDLQSGAVAGFKLLWVLLMATVMGLLLQRLAARLGVVTGLHLAEVCHRQYQKVPRIILWLMVELAIIGSDMQEVIGSAIAINLLSMGKIPLWGGVLITIADTFVFLFLDKYGLRKLEAFFGFLITIMALTFGYEYITVKPNQ…
EOA94604.1	SEEPFTTYFDSKIPIPEDETHSCFSFRKLWAFTGPGFLMSIAYLDPGNIESDLQSGAVAGFKLLWVLLMATVMGLLLQRLAARGGPGGGQGLHLAEVCHRQYQKVPRIILWLMVELAIIGSDMQEVIGSAIAINLLSMGKIPLWGGVLITIADTFVFLFLDKYGLRKLEAFFGFLITIMALTFGYEYITVKPNQEQLLKGLFIPYCQNCGTPQLEQAVGIVGAVIMPHNMYLHSALVKSRQVNRANKKEVREANKYFFIESCIALFVSFIINIFVVTVFAEAFFDKTNADVHEVCANSSSPHSSLFPNNNETLAVDIYKGGAVLGCYFGPAALYIWAIGILAAGQSSTMTGTYSGQFVMEGFLNLRWSRFARVLLTRSIAITPTLFVAIFQDVQHLTGM…
KFO76690.1	FSFRKLWAFTGPGFLMSIAYLDPGNIESDLQSGAVAGFKLLWVLLLATVIGLLLQRLAARLGVVTGLHLAEVCNRQYQKVPRIILWLMVELAIIGSDMQEVIGSAIAINLLSMGKIPLWGGVLITIADTFVFLFLDKYGLRKLEAFFGFLITIMAVTFGYEYVTVKPDQEKLLKGLFIPYCQNCGTPQLEQAVGIVGAVIMPHNMYLHSALVKSRQVNRANKREVREANKYFFIESCIALFVSFIINIFVVTVFAEAFFEKTNADVNDVCANASSPHSSLFPNNTETLEVDIYKGGVVLGCYFGPAALYIWAIGILAAGQSSTMTGTYSGQFVMEGFLNLRWSRFARVLLTRSIAITPTLFVAIFQDVEHLTGMNDFLNVLMSLQLPFALIPVLTFTSL…
KGL91167.1	FSFRKLWAFTGPGFLMSIAYLDPGNIESDLQSGAVAGFKLLWVLMLSTIIGLLLQRLAARLGVVTGLHLAEVCNRQYQKVPRIILWLMVELAIIGSDMQEVIGSAIAINLLSVGKIPLWGGVLITIADTFVFLFLDKYGLRKLEAFFGLLITIMALTFGYEYITVKPDQEKLLQGLFIPYCQNCGTAQLEQAVGIVGAVIMPHNMYLHSALVKSRQVNRANKREVQEANKYFFIESCIALFVSFIINIFVVTVFAEAFFAKTNADVNAVCVNASSPHSSLFPNNNQTLEVDIYKGGAVLGCYFGPAALYIWAIGILAAGQSSTMTGTYSGQFVMEGFLNLRWSRFARVLLTRSIAITPTLLVAIFQDVEHLTGMNDFLNVLMSLQLPFALIPVLTFTSL…
XP_009995841.1	MGNWDTDRRASYEDAPGGLGEGVNTISSSSNPLQPPDTPSEEPFTTYFDSKIPIPEDEKVTFFFFSFRKLWAFTGPGFLMSIAYLDPGNIESDLQSGAIAGFKLLWVLMLATIIGLLLQRLAARLGVVTGLHLAEVCNRQYQKVPRIILWLMVELAIIGSDMQEVIGSAIAINLLSVGRIPLWGGVLITIADTFVFLFLDKYGLRKLEAFFGFLITIMALTFGYEYVTVRPDQGQLLRGLFVPGCPGCGTPQLEQAVGIVGAVIMPHNMYLHSALVKSRQVNRANKREVQEANKYFFIESCIALFVSFIINIFVVTVFAEAFFDKTNGDVHRVCGNTSSPHVSLFPNNNQTLEVDIYKGGVVLGCYFGPAALYIWAIGILAAGQSSTMTGTYSGQFVME…
XP_009966592.1	MGSSDTDQKASYEDASGEHGEVISTISSSMNPLQPPDTSSEEPFTTYFDSKIPIPEDETHSCFSFRKLWAFTGPGFLMSIAYLDPGNIESDLQSGAVAGFKLLWVLLLATIIGLLLQRLAARLGVVXXXXVAELCFLLYLXVPRIILWLMVELAIIGSDMQEVIGSAIAINLLSVGKIPLWGGVLITIADTFVFLFLDKYGLRKLEAFFGFLITIMALTFGYEYVTVKPSQEKLLQGLFIPYCQNCGTAQLEQAVGIVGAVIMPHNMYLHSALVKSRQVNRANKREVREANKYFFIESCVALFVSFIINIFVVTVFAEAFFEKTNADVSSVCVNTSSPHSSLFPNNNQTLEVDIYKGGVVLGCYFGPAALYIWAIGILAAGQSSTMTGTYSGQFVMEGF…
XP_010071818.1	TLTHFSFLFHSGFAAAEDAPGEHGEVVSTISSSMNPLQPPDASSEEPFTTYFDSKIPIPEDETHSCFSFRKLWAFTGPGFLMSIAYLDPGNIESDLQSGAVAGFKLLWVLMLATIIGLLLQRLGGRXVTGLHLAEVCNRQYQKVPRIILWLMVELAIIGSDMQEVIGSAIAINLLSLGKIPLWGGVLITIADTFMFLFLDKYGLRKLEAFFGFLITIMALTFGYEYITVKPSQQKLLQGLFVPYCQGCGTPQLEQAVGIVGAVIMPHNMYLHSALVKSRQVNRANKKEVREANKYFFIESCIALFVSFIINIFVVTVFAEAFYDKTNADVSAVCVNASSPHSSLFPNNNETLEVDIYKGGVVLGCYFGSAALYIWAIGILAAGQSSTMTGTYSGQFVME…
KFP97088.1	FSFRKLWAFTGPGFLMSIAYLDPGNIESDLQSGAVAGFKLLWVLMLATIIGLLRQRLAARLGVVTGLHLAEVCNRQYQKVPRIILWLMVELAIIGSDMQEVIGSAIAINLLSVGKIPLWGGVLITIADTFVFLFLDKYGLRKLEAFFGFLITIMALTFGYEYITVKPSQEKLLKGLFIPYCQNCGTTQLEQAVGIVGAVIMPHNMYLHSALVKSRQVNRANKREVQEANKYFFIESCIALFVSFIINIFVVTVFAEAFFEKTNADVNGVCMNASSPHSSLFPNNNETLEVDIYKGGVVLGCYFGPAALYIWAIGILAAGQSSTMTGTYSGQFVMEGFLNLRWSRFARVLLTRSIAITPTLFVAIFQDVEHLTGMNDFLNVLMSLQLPFALIPILTFTSL…
KFM10898.1	FSFRKLWAFTGPGFLMSIAYLDPGNIESDLQSGAVAGFKLLWVLMLATIIGLLLQRLAARLGVVTGLHLAEVCHRQYQKVPRIILWLMVELAIIGSDMQEVIGSAIAINLLSVGKIPLWGGVLITIADTFVFLFLDKYGLRKLEAFFGFLITIMALTFGYEYITVKPDQEKLLKGLFIPYCQNCGTPQLEQAVGIVGAVIMPHNMYLHSALVKSRQVNRANKREVREANKYFFIESCIALFVSFIINIFVVTVFAEAFFEKTNADVSDVCVNASSPHSSLFPNNNQTLEVDIYKGGVVLGCYFGPAALYIWAIGILAAGQSSTMTGTYSGQFVMEGFLNLRWSRFARVLLTRSIAITPTLFVAIFQDVEHLTGMNDFLNVLMSLQLPFALIPVLTFTSL…
KFW64954.1	FSFRKLWAFTGPGFLMSIAYLDPGNIESDLQSGAVAGFKLLWVLMLATIIGLLLQRLAARLGVVTGLHLAEVCNRQYQKVPRIILWLMVELAIIGSDMQEVIGSAIAINLLSVGKIPLWGGVLITIADTFVFLFLDKYGLRKLEAFFGFLITIMALTFGYEYITVKPDQEKLLKGLFIPYCQNCGTPQLEQAVGIVGAVIMPHNMYLHSALVKSRQVNRANKREVREANKYFFIESCIALFVSFIINIFVVTVFAEAFFEKTNADVSDVCVNASSPHSSLFPNNNQTLEVDIYKGGVVLGCYFGPAALYIWAIGILAAGQSSTMTGTYSGQFVMEGFLNLRWSRFARVLLTRSIAITPTLFVAIFQDVEHLTGMNDFLNVLMSLQLPFALIPVLTFTSL…
KFR05383.1	FSFRKLWAFTGPGFLMSIAYLDPGNIESDLQSGAVAGFKLLWVLMLATIIGLLLQRLAARLGVVTGLHLAEVCNRQYQKVPRIILWLMVELAIIGSDMQEVIGSAIAINLLSVGKIPLWGGVLITIADTFMFLFLDKYGLRKLEAFFGFLITIMALTFGYEYITVKPNQEKLLKGLFIPYCQNCGTPQLEQAVGIVGAVIMPHNMYLHSALVKSRQVNRANKKEVREANKYFFIESCIALFVSFIINIFVVTVFAEAFFEKTNADVNNVCMNSSSPHSSLFPNNNQTLEVDIYKGGVVLGCYFGPAALYIWAIGILAAGQSSTMTGTYSGQFVMEGFLNLRWSRFARVLLTRSIAITPTLFVAIFQDVEHLTGMNDFLNVLMSLQLPFALIPVLTFTSL…
KFV74267.1	FSFRKLWAFTGPGFLMSIAYLDPGNIESDLQSGAVAGFKLLWVLMLATIIGLLLQRLAARLGVVTGLHLAEVCNRQYQKVPRIILWLMVELAIIGSDMQEVIGSAIAINLLSMGKIPLWGGVLITIADTFVFLFLDKYGLRKLEAFFGFLITIMALTFGYEYVTVKPDQGNLLKGLFVPYCQNCGTAQLEQAVGIVGAVIMPHNMYLHSALVKSRQVNRANKREVQEANKYFFIESCIALFVSFIINIFVVSVFAEAFFEKTNEDVSAVCTNASSPHSSLFPSNNQTLEVDIYKGGVVLGCYFGPAALYIWAIGILAAGQSSTMTGTYSGQFVMEGFLNLRWSRFARVLLTRSIAITPTLLVAIFQDVEHLTGMNDFLNVLMSLQLPFALIPVLTFTSL…
KFQ62774.1	FSFRKLWAFTGPGFLMSIAYLDPGNIESDLQSGAVAGFKLLWVLMLATTIGLLRQRLAARLGVVTGLHLAEVCNRQYQKVPRIILWLMVELAIIGSDMQEVIGSAIAINLLSMGKIPLWGGVLITIADTFMFLFLDKYGLRKLEAFFGFLITIMALTFGYEYITVKPSQENLLKGLFIPYCQNCGTAQLEQAVGIVGAVIMPHNMYLHSALVKSRQVNRANKREVQEANKYFFIESCIALFVSFIINIFVVTVFAEAFFEKTNADVNNVCVNASSPHSSLFPNNNETLEVDIYKGGVVLGCYFGPAALYIWAIGILAAGQSSTMTGTYSGQFVMEGFLNLRWSRFARVLLTRSIAITPTLFVAIFQDVEHLTGMNDFLNVLMSLQLPFALIPVLTFTSL…
KFW01444.1	FSFRKLWAFTGPGFLMSIAYLDPGNIESDLQSGAVAGFKLLWVLMLATTIGLLLQRLAARLGVVTGLHLAEVCNRQYQKVPRIILWLMVELAIIGSDMQEVIGSAIAINLLSVGKIPLWGGVIITIADTFVFLFLDKYGLRKLEAFFGFLITIMALTFGYEYITVKPNQEKLLKGLFIPYCQNCGTSQLEQAVGIVGAVIMPHNMYLHSALVKSRQVNRANKREVQEANKYFFIESCIALFVSFIINIFVVTVFAEAFFEKTNADVNNVCTNASSPHSSLFPNNNQTLEVDIYKGGVVLGCYFGPAALYIWAIGILAAGQSSTMTGTYSGQFVMEGFLNLRWSRFARVLLTRSIAITPTLFVAIFQDVEHLTGMNDFLNVLMSLQLPFALIPVLTFTSL…
KFU89509.1	FSFRKLWAFTGPGFLMSIAYLDPGNIESDLQSGAIAGFKLLWVLMLATIIGLLLQRLAARLGVVTGLHLAEVCNRQYQKVPRIILWLMVELAIIGSDMQEVIGSAIAINLLSVGRIPLWGGVLITIADTFVFLFLDKYGLRKLEAFFGFLITIMALTFGYEYVTVRPDQGQLLRGLFVPGCPGCGTPQLEQAVGIVGAVIMPHNMYLHSALVKSRQVNRANKREVQEANKYFFIESCIALFVSFIINIFVVTVFAEAFFDKTNGDVHRVCGNTSSPHVSLFPNNNQTLEVDIYKGGVVLGCYFGPAALYIWAIGILAAGQSSTMTGTYSGQFVMEGFLNLRWSRFARVLLTRSIAITPTLFVAIFQDVEHLTGMNDFLNVLMSLQLPFALIPVLTFTSL…
KFP66032.1	FSFRKLWAFTGPGFLMSIAYLDPGNIESDLQSGAVAGFKLLWVLMLATIIGLLLQRLAARLGVVTGLHLAEVCNRQYQKVPRIILWLMVELAIIGSDMQEVIGSAIAINLLSVGKIPLWGGVLITIADTFVFLFLDKYGLRKLEAFFGFLITIMALTFGYEYITVKPNQEKLLKGLFIPYCQNCGTRQLEQAVGIVGAVIMPHNMYLHSALVKSRQVNRANKKEVREANKYFFIESCIALFVSFIINIFVVTVFAEAFFEKTNADVNEVCVNTSSPHSSLFPNNNETLEVDIYKGGVVLGCYFGPAALYIWAIGILAAGQSSTMTGTYSGQFVMEGFLNLRWSRFARVLLTRSIAITPTLFVAIFQDVEHLTGMNDFLNVLMSLQLPFALIPILTFTSL…
KFO12763.1	FSFRKLWAFTGPGFLMSIAYLDPGNIESDLQSGAVAGFKLLWVLMLATIIGLLLQRLAARLGVVTGLHLAEVCNRQYQKVPRIILWLMVELAIIGSDMQEVIGSAIAINLLSVGKIPLWGGVLITIADTFVFLFLDKYGLRKLEAFFGFLITIMALTFGYEYITVKPDQGKLLKGLFIPYCQNCGTPQLEQAVGIVGAVIMPHNMYLHSALVKSRQVNRANKREVREANKYFFIESCIALFVSFIINIFVVTVFAEAFFEKTNADVNNVCTNASSPHSSLFPNNNQTLEVDIYKGGVVLGCYFGPAALYIWAIGILAAGQSSTMTGTYSGQFVMEGFLNLRWSRFARVLLTRSIAITPTLFVAIFQDVEHLTGMNDFLNVLMSLQLPFALIPVLTFTSL…
KFW76278.1	FSFRKLWAFTGPGFLMSIAYLDPGNIESDLQSGAVAGFKLLWVLLLATVIGLLLQRLAARLGVVTGLHLAEVCHRQYHKFPRIILWLMVELAIIGSDMQEVIGSAIAINLLSVGKIPLWGGVLITIADTFVFLFLDKYGLRKLEAFFGFLITIMALTFGYEYITVKPNQEKVLQGLFIPYCKDCGTPQLEQAVGIVGAVIMPHNMYLHSALVKSRQVDRSNKRQVRDANKYFFIESCIALFVSFIINIFVVAVFAEAFFNKTNADVNQVCVNSSSPHSSLFPNNNETLEVDIYKGGVVLGCYFGPAALYIWAIGILAAGQSSTMTGTYSGQFVMEGFLNLRWSRFARVLLTRSIAVTPTLFVAIFQDVEHLTGMNDFLNVLMSLQLPFALIPVLTFTSL…
KFQ70717.1	FSFRKLWAFTGPGFLMSIAYLDPGNIESDLQSGAVAGFKLLWVLMLATIIGLLLQRLAARLGVVTGLHLAEVCNRQYHKVPRIILWLMVELAIIGSDMQEVIGSAIAINLLSVGKIPLWGGVLITIADTFVFLFLDKYGLRKLEAFFGFLITIMALTFGYEYITVKPNQEKLLKGLFVPYCQNCGTTQLEQAVGIVGAVIMPHNMYLHSALVKSRQVNRANKREVREANKYFFIESCIALFVSFIINIFVVTVFAEAFFEKTNADVNGVCVNASSPHTSLFPNNNKTLEVDIYKGGVVLGCYFGPAALYIWAIGILAAGQSSTMTGTYSGQFVMEGFLNLRWSRFARVLLTRSIAITPTLFVAIFQDVEHLTGMNDFLNVLMSLQLPFALIPVLTFTSL…
XP_025001082.1	MAGEQSTEPRAAPEMANGAPLEPLPGPEQRSAMGPPYSDLRESDEDPPAEAVGSVSGSRNALQPLPGEDDEEPFTTYFDSKIPIPDDETHSCFSFRKLWAFTGPGFLMSIAYLDPGNIESDLQSGAVAGFKLLWVLLLATVIGLLLQRLAARLGVVTGLHLAEVCHRQYRTVPRIILWLMVELAIIGSDMQEVIGSAIAINLLSVGKIPLWGGVLITIADTFVFLFLDKYGLRKLEAFFGFLITIMALTFGYEYVTVRPDQKQLLRGLFVPECRGCGTPQLEQAVGIVGAVIMPHNMYLHSALVKSRQVNRSNPREVRDANKYFFAESCIALFVSFIINVFVVSVFAEAFYGKTNADVHEVCANASSAHAALFPSDNATLEVDIYKGGAVLGCYFGPAA…
XP_025001083.1	MAGEQSTEPRAAPEMANGAPLEPLPGPEQRSAMGPPYSDLRESDEDPPAEAVGSVSGSRNALQPLPGEDDEEPFTTYFDSKIPIPDDETHSCFSFRKLWAFTGPGFLMSIAYLDPGNIESDLQSGAVAGFKLLWVLLLATVIGLLLQRLAARLGVVTGLHLAEVCHRQYRTVPRIILWLMVELAIIGSDMQEVIGSAIAINLLSVGKIPLWGGVLITIADTFVFLFLDKYGLRKLEAFFGFLITIMALTFGYEYVTVRPDQKQLLRGLFVPECRGCGTPQLEQAVGIVGAVIMPHNMYLHSALVKSRQVNRSNPREVRDANKYFFAESCIALFVSFIINVFVVSVFAEAFYGKTNADVGAVLGCYFGPAALYIWAIGILAAGQSSTMTGTYSGQFVMEG…
XP_025001084.1	MGPPYSDLRESDEDPPAEAVGSVSGSRNALQPLPGEDDEEPFTTYFDSKIPIPDDETHSCFSFRKLWAFTGPGFLMSIAYLDPGNIESDLQSGAVAGFKLLWVLLLATVIGLLLQRLAARLGVVTGLHLAEVCHRQYRTVPRIILWLMVELAIIGSDMQEVIGSAIAINLLSVGKIPLWGGVLITIADTFVFLFLDKYGLRKLEAFFGFLITIMALTFGYEYVTVRPDQKQLLRGLFVPECRGCGTPQLEQAVGIVGAVIMPHNMYLHSALVKSRQVNRSNPREVRDANKYFFAESCIALFVSFIINVFVVSVFAEAFYGKTNADVHEVCANASSAHAALFPSDNATLEVDIYKGGAVLGCYFGPAALYIWAIGILAAGQSSTMTGTYSGQFVMEGFLN…
NP_001121574.1	MGPPYSDLRESDEDRPAEAVGSVSGSRNALQPLPGEDDEEPFTTYFDSKIPIPDDETHSCFSFRKLWAFTGPGFLMSIAYLDPGNIESDLQSGAVAGFKLLWVLLLATVIGLLLQRLAARLGVVTGLHLAEVCHRQYRTVPRIILWLMVELAIIGSDMQEVIGSAIAINLLSVGKIPLWGGVLITIADTFVFLFLDKYGLRKLEAFFGFLITIMALTFGYEYVTVRPDQKQLLRGLFVPECRGCGTPQLEQAVGIVGAVIMPHNMYLHSALVKSRQVNRSNPREVRDANKYFFAESCTALFVSFIINVFVVSVFAEAFYGKTNADVHEVCANASSAHAALFPSDNATLEVDIYKGGAVLGCYFGPAALYIWAIGILAAGQSSTMTGTYSGQFVMEGFLN…
XP_025001085.1	MAESKDPPAEAVGSVSGSRNALQPLPGEDDEEPFTTYFDSKIPIPDDETHSCFSFRKLWAFTGPGFLMSIAYLDPGNIESDLQSGAVAGFKLLWVLLLATVIGLLLQRLAARLGVVTGLHLAEVCHRQYRTVPRIILWLMVELAIIGSDMQEVIGSAIAINLLSVGKIPLWGGVLITIADTFVFLFLDKYGLRKLEAFFGFLITIMALTFGYEYVTVRPDQKQLLRGLFVPECRGCGTPQLEQAVGIVGAVIMPHNMYLHSALVKSRQVNRSNPREVRDANKYFFAESCIALFVSFIINVFVVSVFAEAFYGKTNADVHEVCANASSAHAALFPSDNATLEVDIYKGGAVLGCYFGPAALYIWAIGILAAGQSSTMTGTYSGQFVMEGFLNLRWSRFAR…
ABI24020.1	MGPPYSDLRESDEDRPAEAVGSVSGSRNALQPLPGEDDEEPFTTYFDSKIPIPDDETHSCFSFRKLWAFTGPGFLMSIAYLDPGNIESDLQSGAVAGFKLLWVLLLATVIGLLLQRLAARLGVVTGLHLAEVCHRQYRTVPRIILWLMVELAIIGSDMQEVIGSAIAINLLSVGKIPLWGGVLITIADTFVFLFLDKYGLRKLEAFFGFLITIMALTFGYEYVTVRPDQKQLLRGLFVPECRGCGTPQLEQAVGIVGAVIMPHNMYLHSALVKSRQVNRSNPREVRDANKYFFAESCIALFVSFIINVFVVSVFAEAFYGKTNADVHEVCANASSAHAALFPSDNATLEVDIYKGGAVLGCYFGPAALYIWAIGILAAGQSSTMTGTYSGQFVMEGFLN…
NP_001121573.1	MGPPYSDLRESDEDRPAEAVGSVSGSRNALQPLPGEDDEEPFTTYFDSKIPIPDDETHSCFSFRKLWAFTGPGFLMSIAYLDPGNIESDLQSGAVAGFKLLWVLLLATVIGLLLQRLAARLGVVTGLHLAEVCHRQYRTVPRIILWLMVELAIIGSDMQEVIGSAIAINLLSVGKIPLWGGVLITIADTFVFLFLDKYGLRKLEAFFGFLITIMALTFGYEYVTVRPDQKQLLRGLFVPECRGCGTPQLEQAVGIVGAVIMPHNMYLHSALVKSRQVNRSNPREVRDANKYSFAESCIALFVSFIINVFVVSVFAEAFYGNTNADVHEMCANASSAHAALFPSDNATLGVDIYKGGAVLGCYFGPAALYIWAIGILAAGQSSTMTGTYSGQFVMEGFLN…
XP_015742462.1	MSGERSEEPRSATEMANGAPLEPVPGREQHSAMGPPYSDLRASEEDGPAESVGSVSGSRNTLQPLQGEEDEEPFSTYFDSKIPIPEDDTHSCFSFRKLWAFTGPGFLMSIAYLDPGNIESDLQSGAVAGFKLLWVLLLATVIGLLLQRLAARLGVVTGLHLAEVCNRQYHKVPRIMLWLMMEIAIIGSDMQEVIGTAIAFSLLSMGKIPLWGGVLITIADTLFFLFLDKYGLRKLEAFFGFLITIMALTFGYEYVTVKPDQKQLLRGLFVPECPGCGTPQLEQAVGIVGAVIMPHNMYLHSALVKSRQVNRANPREVREANKYFFAESCIALFVSFIINVFVVSVFAEAFYNKTNMDVHEVCANASSVHAGLFPNNNNTLEVDIYKGGAVLGCYFGPAA…
XP_015742461.1	MEAGPEKRRFVPREPCGSGNSRAEPSAAQGSSGSRTVPSGAELRPAGTGNEAAELGGSGGGANGAPLEPVPGREQHSAMGPPYSDLRASEEDGPAESVGSVSGSRNTLQPLQGEEDEEPFSTYFDSKIPIPEDDTHSCFSFRKLWAFTGPGFLMSIAYLDPGNIESDLQSGAVAGFKLLWVLLLATVIGLLLQRLAARLGVVTGLHLAEVCNRQYHKVPRIMLWLMMEIAIIGSDMQEVIGTAIAFSLLSMGKIPLWGGVLITIADTLFFLFLDKYGLRKLEAFFGFLITIMALTFGYEYVTVKPDQKQLLRGLFVPECPGCGTPQLEQAVGIVGAVIMPHNMYLHSALVKSRQVNRANPREVREANKYFFAESCIALFVSFIINVFVVSVFAEAFYNK…
XP_015742464.1	MGPPYSDLRASEEDGPAESVGSVSGSRNTLQPLQGEEDEEPFSTYFDSKIPIPEDDTHSCFSFRKLWAFTGPGFLMSIAYLDPGNIESDLQSGAVAGFKLLWVLLLATVIGLLLQRLAARLGVVTGLHLAEVCNRQYHKVPRIMLWLMMEIAIIGSDMQEVIGTAIAFSLLSMGKIPLWGGVLITIADTLFFLFLDKYGLRKLEAFFGFLITIMALTFGYEYVTVKPDQKQLLRGLFVPECPGCGTPQLEQAVGIVGAVIMPHNMYLHSALVKSRQVNRANPREVREANKYFFAESCIALFVSFIINVFVVSVFAEAFYNKTNMDVHEVCANASSVHAGLFPNNNNTLEVDIYKGGAVLGCYFGPAALYIWAIGILAAGQSSTMTGTYSGQFVMEGFLN…
XP_015742463.1	MVTSRSGRSAMGESKDGPAESVGSVSGSRNTLQPLQGEEDEEPFSTYFDSKIPIPEDDTHSCFSFRKLWAFTGPGFLMSIAYLDPGNIESDLQSGAVAGFKLLWVLLLATVIGLLLQRLAARLGVVTGLHLAEVCNRQYHKVPRIMLWLMMEIAIIGSDMQEVIGTAIAFSLLSMGKIPLWGGVLITIADTLFFLFLDKYGLRKLEAFFGFLITIMALTFGYEYVTVKPDQKQLLRGLFVPECPGCGTPQLEQAVGIVGAVIMPHNMYLHSALVKSRQVNRANPREVREANKYFFAESCIALFVSFIINVFVVSVFAEAFYNKTNMDVHEVCANASSVHAGLFPNNNNTLEVDIYKGGAVLGCYFGPAALYIWAIGILAAGQSSTMTGTYSGQFVMEGF…
KFP54068.1	FSFRKLWAFTGPGFLMSIAYLDPGNIESDLQSGAVAGFKLLWVLMLATIIGLLLQRLAARLGVVTGLHLAEVCNRQYQKVPRIILWLMVELAIIGSDMQEVIGSAIAINLLSMGKIPLWGGVLITIADTFVFLFLDKYGLRKLEAFFGFLITIMALTFGYEYITVKPSQEKLLKGLFIPYCQNCGTPQLEQAVGIVGAVIMPHNMYLHSALVKSRQVNRANKKEVQEANKYFFIESCIALFVSFIINIFVVTVFAEAFFEKTNADVNEVCMNASSPHSSLFPNNNQTLEVDIYKGGVVLGCYFGPAALYIWAIGILAAGQSSTMTGTYSGQFVMEGFLNLRWSRFARVLLTRSIAITPTLFVAIFQDVEHLTGMNDFLNVLMSLQLPFALIPVLTFTSL…
XP_010020775.1	MGNSDTEQKESYEEASGEPGGVVSTISSSMNPLQPPDTSSEEPFTTYFDSKIPIPEDEKQSCFSFRKLWAFTGPGFLMSIAYLDPGNIESDLQSGAVAGFKLLWVLMLATVIGLLLQRLAARLGVVTGLHLAEVCNRQYQKVPRIILWLMVELAIIGSDMQEVIGSAIAINLLSMGKIPLWGGVLITIADTFVFLFLDKYGLRKLEAFFGFLITIMALTFGYEYITVRPNQEKLLKGLFVPYCQDCGTPQLEQAVGIVGAVIMPHNMYLHSALVKSRQVNRANKREVQEANKYFFIESCIALFVSFIINIFVVTVFAEAFFEKNNADVNAVCVNASSPHSSLFPSNNQTLEVDIYKGGVVLGCYFGPAALYIWAIGILAAGQSSTMTGTYSGQFVMEGF…
KFV52876.1	FSFRKLWAFTGPGFLMSIAYLDPGNIESDLQSGAVAGFKLLWVLLLATIIGLLLQRLAARLGVVPRIILWLMVELAIIGSDMQEVIGSAIAINLLSVGKIPLWGGVLITIADTFVFLFLDKYGLRKLEAFFGFLITIMALTFGYEYVTVKPSQEKLLQGLFIPYCQNCGTAQLEQAVGIVGAVIMPHNMYLHSALVKSRQVNRANKREVREANKYFFIESCVALFVSFIINIFVVTVFAEAFFEKTNADVSSVCVNTSSPHSSLFPNNNQTLEVDIYKGGVVLGCYFGPAALYIWAIGILAAGQSSTMTGTYSGQFVMEGFLNLRWSRFARVLLTRSIAITPTLFVAIFQDVEHLTGMNDFLNVLMSLQLPFALIPVLTFTSLPSVMNDFANGLFWKIG…
KGL77175.1	FSFRKLWAFTGPGFLMSIAYLDPGNIESDLQSGAVAGFKLLWVLLLATLIGLLLQRLAARTGNCQQRREKLRKMRMGKVPRIILWLMVELAIIGSDMQEVIGSAIALNLLSMGKIPLWGGVLITIADTFVFLFLDKYGLRKLEAFFGFLITIMAITFGYEYVTVKPDQGSLLKGLFVPYCQNCGTAQLEQAVGIVGAVIMPHNMYLHSALVKSRQVNRSNKREVQEANKYFFIESCIALFVSFIINIFVVSVFAEAFFDKTNEDVSAVCVNASSPHSSLFPSDNRTLEVDIYKGGVVLGCYFGPAALYIWAIGILAAGQSSTMTGTYSGQFVMEGFLNLRWSRFARVLLTRSIAITPTLLVAIFQDVEHLTGMNDFLNVLMSLQLPFALIPVLTFTSLP…
XP_009638745.1	MGTSDTDRKASYEDASGEHGEVVSTISSSMNPLQPPDASSSEPFTTYFDSKIPIPEDETHSCFSFRKLWAFTGPGFLMSIAYLDPGNIESDLQSGAVAGFKLLWVLMLATIIGLLLQRLAARLGVXXXXXXGLVRSRCYLQVPRIVLWLMVELAIIGSDMQEVIGSAIAINLLSVGKIPLWGGVLITIADTFVFLFLDKYGLRKLEAFFGFLITIMALTFGYEYVTVKPNQEKLLKGLFIPYCQNCGTRQLEQAVGIVGAVIMPHNMYLHSALVKSRQVNRANKREVREANKYFFIESCIALFVSFIINIFVVTVFAEAFFEKTNADVNDVCVNASSPHSSLFPSNNQTLEVDIYKGGVVLGCYFGPAALYIWAIGILAAGQSSTMTGTYSGQFVMEGF…
XP_030410440.1	MTKKYILDQSSPVSELVNVTYSKDSPSSQRSSTMAPGKERKILYEDVAEDHEEVISTIYGSPVPQQSLESNDEPFTTYFDEKIPIPEDEKHSWFSFRKLWAFTGPGFLMSIAYLDPGNIESDLQSGAVAGFKLLWVLLLATIIGLLLQRLAARLGVVTGLHLAEVCNRQYQKVPRIILWLMIELAIIGSDMQEVIGSAIAINLLSAGKVPLWGGVLITIADTFMFLFLDKYGLRKLEAFFGFLITIMALTFGYEYVTVKPDQGKLLKGMFMPYCDKCGTPQLEQAVGIVGAVIMPHNMYLHSALVKSRQVNRADKREVREANKYFFIESCIALFVSFLINVFVVSVFAEAFFGKTNEQVNEVCTNSSSPYVGLFPNNNATLEVDIYKGGVVLGCYFGPA…
XP_030410441.1	MTKKYILDQSSPVSELVNVTYSKDSPSSQRSSTMAPGKERKILYDVAEDHEEVISTIYGSPVPQQSLESNDEPFTTYFDEKIPIPEDEKHSWFSFRKLWAFTGPGFLMSIAYLDPGNIESDLQSGAVAGFKLLWVLLLATIIGLLLQRLAARLGVVTGLHLAEVCNRQYQKVPRIILWLMIELAIIGSDMQEVIGSAIAINLLSAGKVPLWGGVLITIADTFMFLFLDKYGLRKLEAFFGFLITIMALTFGYEYVTVKPDQGKLLKGMFMPYCDKCGTPQLEQAVGIVGAVIMPHNMYLHSALVKSRQVNRADKREVREANKYFFIESCIALFVSFLINVFVVSVFAEAFFGKTNEQVNEVCTNSSSPYVGLFPNNNATLEVDIYKGGVVLGCYFGPAA…
TFK03472.1	MTKKYILDQSSPVSELVNVTYSKDSPSSQRSSTMAPGKERKILYEDVSEDHEEVISTVYSSPVPQQSPESNDEPFTTYFDEKIPIPEDEKHSWFSFRKLWAFTGPGFLMSIAYLDPGNIESDLQSGAVAGFKLLWVLLLATIIGLLLQRLAARLGVVTGLHLAEMCNRQYQKVPRIMLWLMIELAIIGSDMQEVIGSAIAINLLSAGKVPLWGGVLITIADTFMFLFLDKYGLRKLEAFFGFLITIMALTFGYEYVTVKPDQGKLLKGMFMPYCDKCGTPQLEQAVGIVGAVIMPHNMYLHSALVKSRQVNRADKREVQEANKYFFIESCVALFISFLINVFVVSVFAEAFFGKTNEQVNKVCTNSSSPHAGLFPNNNETLEVDIYKGGVVLGCYFGPA…
XP_030410442.1	MAPGKERKILYEDVAEDHEEVISTIYGSPVPQQSLESNDEPFTTYFDEKIPIPEDEKHSWFSFRKLWAFTGPGFLMSIAYLDPGNIESDLQSGAVAGFKLLWVLLLATIIGLLLQRLAARLGVVTGLHLAEVCNRQYQKVPRIILWLMIELAIIGSDMQEVIGSAIAINLLSAGKVPLWGGVLITIADTFMFLFLDKYGLRKLEAFFGFLITIMALTFGYEYVTVKPDQGKLLKGMFMPYCDKCGTPQLEQAVGIVGAVIMPHNMYLHSALVKSRQVNRADKREVREANKYFFIESCIALFVSFLINVFVVSVFAEAFFGKTNEQVNEVCTNSSSPYVGLFPNNNATLEVDIYKGGVVLGCYFGPAALYIWAVGILAAGQSSTMTGTYSGQFVMEGFLN…
XP_029769581.1	MAPGKERKILYEDVPEDHEEVISTVYSSPVPQQSPESNDEPFTTYFDEKIPIPEDEKHSWFSFRKLWAFTGPGFLMSIAYLDPGNIESDLQSGAVAGFKLLWVLLLATIIGLLLQRLAARLGVVTGLHLAEMCNRQYQKVPRIMLWLMIELAIIGSDMQEVIGSAIAINLLSAGKVPLWGGVLITIADTFMFLFLDKYGLRKLEAFFGFLITLMALTFGYEYVTVKPDQGKLLKGMFMPYCDKCGTPQLEQAVGIVGAVIMPHNMYLHSALVKSRQVNRADKKEVQEANKYFFIESCVALFVSFLINVFVVSVFAEAFFGKTNEQVHKVCTNSSSPHAGLFPNNNETLEVDIYKGGVVLGCYFGPAALYIWAVGILAAGQSSTMTGTYSGQFVMEGFLN…
XP_024074220.2	MAPGKERKILYDVPEDHEEVISTVYSSPVPQQSPESNDEPFTTYFDEKIPIPEDEKHSWFSFRKLWAFTGPGFLMSIAYLDPGNIESDLQSGAVAGFKLLWVLLLATIIGLLLQRLAARLGVVTGLHLAEMCNRQYQKVPRIMLWLMIELAIIGSDMQEVIGSAIAINLLSAGKVPLWGGVLITIADTFMFLFLDKYGLRKLEAFFGFLITLMALTFGYEYVTVKPDQGKLLKGMFMPYCDKCGTPQLEQAVGIVGAVIMPHNMYLHSALVKSRQVNRADKKEVQEANKYFFIESCVALFVSFLINVFVVSVFAEAFFGKTNEQVHKVCTNSSSPHAGLFPNNNETLEVDIYKGGVVLGCYFGPAALYIWAVGILAAGQSSTMTGTYSGQFVMEGFLNL…
XP_030410444.1	MPEGDSRKDVAEDHEEVISTIYGSPVPQQSLESNDEPFTTYFDEKIPIPEDEKHSWFSFRKLWAFTGPGFLMSIAYLDPGNIESDLQSGAVAGFKLLWVLLLATIIGLLLQRLAARLGVVTGLHLAEVCNRQYQKVPRIILWLMIELAIIGSDMQEVIGSAIAINLLSAGKVPLWGGVLITIADTFMFLFLDKYGLRKLEAFFGFLITIMALTFGYEYVTVKPDQGKLLKGMFMPYCDKCGTPQLEQAVGIVGAVIMPHNMYLHSALVKSRQVNRADKREVREANKYFFIESCIALFVSFLINVFVVSVFAEAFFGKTNEQVNEVCTNSSSPYVGLFPNNNATLEVDIYKGGVVLGCYFGPAALYIWAVGILAAGQSSTMTGTYSGQFVMEGFLNLKWS…
XP_030410445.1	MPEGDSRNVAEDHEEVISTIYGSPVPQQSLESNDEPFTTYFDEKIPIPEDEKHSWFSFRKLWAFTGPGFLMSIAYLDPGNIESDLQSGAVAGFKLLWVLLLATIIGLLLQRLAARLGVVTGLHLAEVCNRQYQKVPRIILWLMIELAIIGSDMQEVIGSAIAINLLSAGKVPLWGGVLITIADTFMFLFLDKYGLRKLEAFFGFLITIMALTFGYEYVTVKPDQGKLLKGMFMPYCDKCGTPQLEQAVGIVGAVIMPHNMYLHSALVKSRQVNRADKREVREANKYFFIESCIALFVSFLINVFVVSVFAEAFFGKTNEQVNEVCTNSSSPYVGLFPNNNATLEVDIYKGGVVLGCYFGPAALYIWAVGILAAGQSSTMTGTYSGQFVMEGFLNLKWSR…
XP_024074221.2	MPGGGSQKDVPEDHEEVISTVYSSPVPQQSPESNDEPFTTYFDEKIPIPEDEKHSWFSFRKLWAFTGPGFLMSIAYLDPGNIESDLQSGAVAGFKLLWVLLLATIIGLLLQRLAARLGVVTGLHLAEMCNRQYQKVPRIMLWLMIELAIIGSDMQEVIGSAIAINLLSAGKVPLWGGVLITIADTFMFLFLDKYGLRKLEAFFGFLITLMALTFGYEYVTVKPDQGKLLKGMFMPYCDKCGTPQLEQAVGIVGAVIMPHNMYLHSALVKSRQVNRADKKEVQEANKYFFIESCVALFVSFLINVFVVSVFAEAFFGKTNEQVHKVCTNSSSPHAGLFPNNNETLEVDIYKGGVVLGCYFGPAALYIWAVGILAAGQSSTMTGTYSGQFVMEGFLNLKWS…
XP_024074222.2	MAPGKERKILYEDVPEDHEEVISTVYSSPVPQQSPESNDEPFTTYFDEKIPIPEDEKHSWFSFRKLWAFTGPGFLMSIAYLDPGNIESDLQSGAVAGFKLLWVLLLATIIGLLLQRLAARLGVVTGLHLAEMCNRQYQKVPRIMLWLMIELAIIGSDMQEVIGSAIAINLLSAGKVPLWGGVLITIADTFMFLFLDKYGLRKLEAFFGFLITLMALTFGYEYVTVKPDQGKLLKGMFMPYCDKCGTPQLEQAVGIVGAVIMPHNMYLHSALVKSRQVNRADKKEVQEANKYFFIESCVALFVSFLINVFVVSVFAEAFFGKTNEQVHKVCTNSSSPHAGLFPNNNETLEVDIYKGGVVLGCYFGPAALYIWAVGILAAGQSSTMTGTYSGQFVMEGFLN…
XP_027685058.1	MPGGGSQKDVAEDVSEDHEEVISTIYNRPVPQQSPESNGEPFATYFDEKIPIPEDEKHSWFSFRKLWAFTGPGFLMSIAYLDPGNIESDLQSGAVAGFKLLWVLLLATVIGLLLQRLAARLGVVTGLHLAEMCNRQYQKVPRIMLWLMIELAIIGSDMQEVIGSAIAINLLSAGKVPLWGGVLITIADTFMFLFLDKYGLRKLEAFFGFLITIMALTFGYEYVTVKPDQGKLLKGMFIPYCDKCGTQQLEQAVGIVGAVIMPHNMYLHSALVKSRQVNRADKREVQEANKYFFIESCVALFVSFLINVFVVSVFAEAFFGKTNEQVNKVCTNSSSPHAGLFPNNNETLEVDIYKGGVVLGCYFGPAALYIWAVGILAAGQSSTMTGTYSGQFVMEGFLN…
XP_027685057.1	MAPGKERKILYEDVAEDVSEDHEEVISTIYNRPVPQQSPESNGEPFATYFDEKIPIPEDEKHSWFSFRKLWAFTGPGFLMSIAYLDPGNIESDLQSGAVAGFKLLWVLLLATVIGLLLQRLAARLGVVTGLHLAEMCNRQYQKVPRIMLWLMIELAIIGSDMQEVIGSAIAINLLSAGKVPLWGGVLITIADTFMFLFLDKYGLRKLEAFFGFLITIMALTFGYEYVTVKPDQGKLLKGMFIPYCDKCGTQQLEQAVGIVGAVIMPHNMYLHSALVKSRQVNRADKREVQEANKYFFIESCVALFVSFLINVFVVSVFAEAFFGKTNEQVNKVCTNSSSPHAGLFPNNNETLEVDIYKGGVVLGCYFGPAALYIWAVGILAAGQSSTMTGTYSGQFVME…
EMP28973.1	MAFVNAEDVAEDVSEDHEEVISTIYNRPVPQQSPESNGEPFATYFDEKIPIPEDEKHSWFSFRKLWAFTGPGFLMSIAYLDPGNIESDLQSGAVAGFKLLWVLLLATVIGLLLQRLAARLGVVTGLHLAEMCNRQYQKVPRIMLWLMIELAIIGSDMQEVIGSAIAINLLSAGKVPLWGGVLITIADTFMFLFLDKYGLRKLEAFFGFLITIMALTFGYEYVTVKPDQGKLLKGMFIPYCDKCGTQQLEQAVGIVGAVIMPHNMYLHSALVKSRQVNRADKREVQEANKYFFIESCVALFVSFLINVFVVSVFAEAFFGKTNEQVNKVCTNSSSPHAGLFPNNNETLEVDIYKGGVVLGCYFGPAALYIWAVGILAAGQSSTMTGTYSGQFVMEGFLNL…
XP_027685059.1	MSIAYLDPGNIESDLQSGAVAGFKLLWVLLLATVIGLLLQRLAARLGVVTGLHLAEMCNRQYQKVPRIMLWLMIELAIIGSDMQEVIGSAIAINLLSAGKVPLWGGVLITIADTFMFLFLDKYGLRKLEAFFGFLITIMALTFGYEYVTVKPDQGKLLKGMFIPYCDKCGTQQLEQAVGIVGAVIMPHNMYLHSALVKSRQVNRADKREVQEANKYFFIESCVALFVSFLINVFVVSVFAEAFFGKTNEQVNKVCTNSSSPHAGLFPNNNETLEVDIYKGGVVLGCYFGPAALYIWAVGILAAGQSSTMTGTYSGQFVMEGFLNLKWSRFARVILTRSIAITPTLLVAIFQDVEHLTGMNDFLNVLQSLQLPFALIPVLTFTSLHPVMNDFANGLGWKI…
XP_014462407.2	MSACHVILFPSAFINISGASIHRAESSHSQHNLAYSKDSPASQRSSTMAPGRDRKASYEEAPGDDGEVVTTVCNSAGAIQSAESMEEPFTTYFDEKIPIPEDEVQSWFSFRKLWAFTGPGFLMSIAYLDPGNIESDLQSGAVAGFKLLWVLMLATIIGLLLQRLAARLGVVTGLHLAEVCNRQYQKVPRIILWLMIELAIVGSDMQEVIGSAIAINLLSVGRIPLWGGVLITIADTFMFLFLDKYGLRKLEAFFGFLITIMALTFGYEYITVKPDQGQLLKGMFFPYCQGCGTPQLEQAVGIVGAVIMPHNMYLHSALVKSRQVNRAKKKEVQEANKYFFIESCIALFISFLINIFVVSVFAEAFFGKTNEQVLETCMNTSSPYSGLFPPNNKTLEVDI…
XP_019336606.1	MSACHVILFPSAFINISGASIHRAESSHSQHNLAYSKDSPASQRSSTMAPGRDRKASYEAPGDDGEVVTTVCNSAGAIQSAESMEEPFTTYFDEKIPIPEDEVQSWFSFRKLWAFTGPGFLMSIAYLDPGNIESDLQSGAVAGFKLLWVLMLATIIGLLLQRLAARLGVVTGLHLAEVCNRQYQKVPRIILWLMIELAIVGSDMQEVIGSAIAINLLSVGRIPLWGGVLITIADTFMFLFLDKYGLRKLEAFFGFLITIMALTFGYEYITVKPDQGQLLKGMFFPYCQGCGTPQLEQAVGIVGAVIMPHNMYLHSALVKSRQVNRAKKKEVQEANKYFFIESCIALFISFLINIFVVSVFAEAFFGKTNEQVLETCMNTSSPYSGLFPPNNKTLEVDIY…
XP_006031772.2	MSTCHVILFPSAFINVSGASIHRAESSHSQRNLAYSKDSPASQRSSTMAPSRDRKASYEEAPGDDGEVVTTVCNSAGAVQSAESIEEPFTTYFDEKIPIPEDEVQSWFSFRKLWAFTGPGFLMSIAYLDPGNIESDLQSGAVAGFKLLWVLMLATIIGLLLQRLAARLGVVTGLHLAEVCNRQYQKVPRIILWLMIELAIIGSDMQEVIGSAIAINLLSVGRIPLWGGVLITIADTFVFLFLDKYGLRKLEAFFGFLITIMALTFGYEYITVKPDQGQLLKGMFFPYCQGCGTPQLEQAVGIVGAVIMPHNMYLHSALVKSRQVNRAKKKEVQEANKYFFIESCIALFISFLINIFVVSVFAEAFFGKTNEQVLETCMNTSSPYSGLFPPNNKTLEVDI…
XP_025069162.1	MSTCHVILFPSAFINVSGASIHRAESSHSQRNLAYSKDSPASQRSSTMAPSRDRKASYEEAPGDDGEVVTTVCNSAGAVQSAESIEEPFTTYFDEKIPIPEDEVQSWFSFRKLWAFTGPGFLMSIAYLDPGNIESDLQSGAVAGFKLLWVLMLATIIGLLLQRLAARLGVVTGLHLAEVCNRQYQKVPRIILWLMIELAIIGSDMQEVIGSAIAINLLSVGRIPLWGGVLITIADTFVFLFLDKYGLRKLEAFFGFLITIMALTFGYEYITVKPDQGQLLKGMFFPYCQGCGTPQLEQAVGIVGAVIMPHNMYLHSALVKSRQVNRAKKKEVQEANKYFFIESCIALFISFLINIFVVSVFAEAFFGKTNEQVLETCMNTSSPYSGLFPPNNKTLEVDI…
XP_014462404.1	MADNLAYSKDSPASQRSSTMAPGRDRKASYEEAPGDDGEVVTTVCNSAGAIQSAESMEEPFTTYFDEKIPIPEDEVQSWFSFRKLWAFTGPGFLMSIAYLDPGNIESDLQSGAVAGFKLLWVLMLATIIGLLLQRLAARLGVVTGLHLAEVCNRQYQKVPRIILWLMIELAIVGSDMQEVIGSAIAINLLSVGRIPLWGGVLITIADTFMFLFLDKYGLRKLEAFFGFLITIMALTFGYEYITVKPDQGQLLKGMFFPYCQGCGTPQLEQAVGIVGAVIMPHNMYLHSALVKSRQVNRAKKKEVQEANKYFFIESCIALFISFLINIFVVSVFAEAFFGKTNEQVLETCMNTSSPYSGLFPPNNKTLEVDIYKGGVVLGCYFGPAALYIWAVGILAAGQ…
XP_019336608.1	MAFLNNLAYSKDSPASQRSSTMAPGRDRKASYEEAPGDDGEVVTTVCNSAGAIQSAESMEEPFTTYFDEKIPIPEDEVQSWFSFRKLWAFTGPGFLMSIAYLDPGNIESDLQSGAVAGFKLLWVLMLATIIGLLLQRLAARLGVVTGLHLAEVCNRQYQKVPRIILWLMIELAIVGSDMQEVIGSAIAINLLSVGRIPLWGGVLITIADTFMFLFLDKYGLRKLEAFFGFLITIMALTFGYEYITVKPDQGQLLKGMFFPYCQGCGTPQLEQAVGIVGAVIMPHNMYLHSALVKSRQVNRAKKKEVQEANKYFFIESCIALFISFLINIFVVSVFAEAFFGKTNEQVLETCMNTSSPYSGLFPPNNKTLEVDIYKGGVVLGCYFGPAALYIWAVGILAA…
XP_019336609.1	MFYLLCSEDNLAYSKDSPASQRSSTMAPGRDRKASYEEAPGDDGEVVTTVCNSAGAIQSAESMEEPFTTYFDEKIPIPEDEVQSWFSFRKLWAFTGPGFLMSIAYLDPGNIESDLQSGAVAGFKLLWVLMLATIIGLLLQRLAARLGVVTGLHLAEVCNRQYQKVPRIILWLMIELAIVGSDMQEVIGSAIAINLLSVGRIPLWGGVLITIADTFMFLFLDKYGLRKLEAFFGFLITIMALTFGYEYITVKPDQGQLLKGMFFPYCQGCGTPQLEQAVGIVGAVIMPHNMYLHSALVKSRQVNRAKKKEVQEANKYFFIESCIALFISFLINIFVVSVFAEAFFGKTNEQVLETCMNTSSPYSGLFPPNNKTLEVDIYKGGVVLGCYFGPAALYIWAVG…
XP_006031771.1	MAPSRDRKASYEEAPGDDGEVVTTVCNSAGAVQSAESIEEPFTTYFDEKIPIPEDEVQSWFSFRKLWAFTGPGFLMSIAYLDPGNIESDLQSGAVAGFKLLWVLMLATIIGLLLQRLAARLGVVTGLHLAEVCNRQYQKVPRIILWLMIELAIIGSDMQEVIGSAIAINLLSVGRIPLWGGVLITIADTFVFLFLDKYGLRKLEAFFGFLITIMALTFGYEYITVKPDQGQLLKGMFFPYCQGCGTPQLEQAVGIVGAVIMPHNMYLHSALVKSRQVNRAKKKEVQEANKYFFIESCIALFISFLINIFVVSVFAEAFFGKTNEQVLETCMNTSSPYSGLFPPNNKTLEVDIYKGGVVLGCYFGPAALYIWAVGILAAGQSSTMTGTYSGQFVMEGFLN…
XP_019336610.1	MAPGRDRKASYEEAPGDDGEVVTTVCNSAGAIQSAESMEEPFTTYFDEKIPIPEDEVQSWFSFRKLWAFTGPGFLMSIAYLDPGNIESDLQSGAVAGFKLLWVLMLATIIGLLLQRLAARLGVVTGLHLAEVCNRQYQKVPRIILWLMIELAIVGSDMQEVIGSAIAINLLSVGRIPLWGGVLITIADTFMFLFLDKYGLRKLEAFFGFLITIMALTFGYEYITVKPDQGQLLKGMFFPYCQGCGTPQLEQAVGIVGAVIMPHNMYLHSALVKSRQVNRAKKKEVQEANKYFFIESCIALFISFLINIFVVSVFAEAFFGKTNEQVLETCMNTSSPYSGLFPPNNKTLEVDIYKGGVVLGCYFGPAALYIWAVGILAAGQSSTMTGTYSGQFVMEGFLN…
XP_014462411.1	MGSGGSKKEAPGDDGEVVTTVCNSAGAIQSAESMEEPFTTYFDEKIPIPEDEVQSWFSFRKLWAFTGPGFLMSIAYLDPGNIESDLQSGAVAGFKLLWVLMLATIIGLLLQRLAARLGVVTGLHLAEVCNRQYQKVPRIILWLMIELAIVGSDMQEVIGSAIAINLLSVGRIPLWGGVLITIADTFMFLFLDKYGLRKLEAFFGFLITIMALTFGYEYITVKPDQGQLLKGMFFPYCQGCGTPQLEQAVGIVGAVIMPHNMYLHSALVKSRQVNRAKKKEVQEANKYFFIESCIALFISFLINIFVVSVFAEAFFGKTNEQVLETCMNTSSPYSGLFPPNNKTLEVDIYKGGVVLGCYFGPAALYIWAVGILAAGQSSTMTGTYSGQFVMEGFLNLKWS…
XP_019336611.1	MGSGGSKKAPGDDGEVVTTVCNSAGAIQSAESMEEPFTTYFDEKIPIPEDEVQSWFSFRKLWAFTGPGFLMSIAYLDPGNIESDLQSGAVAGFKLLWVLMLATIIGLLLQRLAARLGVVTGLHLAEVCNRQYQKVPRIILWLMIELAIVGSDMQEVIGSAIAINLLSVGRIPLWGGVLITIADTFMFLFLDKYGLRKLEAFFGFLITIMALTFGYEYITVKPDQGQLLKGMFFPYCQGCGTPQLEQAVGIVGAVIMPHNMYLHSALVKSRQVNRAKKKEVQEANKYFFIESCIALFISFLINIFVVSVFAEAFFGKTNEQVLETCMNTSSPYSGLFPPNNKTLEVDIYKGGVVLGCYFGPAALYIWAVGILAAGQSSTMTGTYSGQFVMEGFLNLKWSR…
XP_025043963.1	MESYSEKEGQCLPWGSVTQLKPTERLSATNLEAPLTNFFALKKGRGLEAVLCLASAPGFGAERSLNLSIVSSVLQHPWFSFRKLWAFTGPGFLMSIAYLDPGNIESDLQSGAVAGFKLLWVLLLATVIGLLLQRLAARLGVVTGLHLAEVCNRQYQKVPRIMLWLMIELAIIGSDMQEVIGSAIAINLLSAGKVPLWGGVLITIADTFMFLFLDKYGLRKLEAFFGFLITIMAITFGYEYVTVKPDQGKLLTGMFLPYCENCGTPQLEQAVGIVGAVIMPHNMYLHSALVKSRQVNRANKKEVQEANKYFFIESCIALFISFLINVFVVSVFAEAFFGQTNANVSQACANSSSPHAGLFPQNNQSLEVDIYKGGVVLGCYFGPAALYIWAVGILAAGQS…
XP_013799133.1	VPRIILWLMVELAIIGSDMQEVIGSAIAMNLLSVGKIPLWGGVLITIADTFVFLFLDKYGLRKLEALFGFLITIMALTFGYEYVTVKPDQGNLLKGLFVPYCQNCGTPQLEQAVGIVGAVIMPHNMYLHSALVKSRQVNRANKREVQEANKYFFIESCIALFVSFIINIFVVSVFAEAFFEKTNENVSAVCTNASSPHSSLFPNNNQTLEVDIYKGGVVLGCYFGPAALYIWAIGILAAGQSSTMTGTYSGQFVMEGFLNLRWSRFARVLLTRSIAITPTLLVAIFQDVEHLTGMNDFLNVLMSLQLPFALIPVLTFTSLPSVMNDFANGLFWKIGGGVVILVVCSINMYFVVAYVMALNHMALYIGAAILSVIYLSFVAYLTWLCLIALGVSFLACGK…
XP_026570613.1	MTPGKEREALCEDTSGDGVTTIYSNPVSPQSSDSTDEFTTYFDQKIPIPQDEKHPWFSFRKLWAFTGPGFLMSIAYLDPGNIESDLQSGAVAGFKLLWVLLLATVIGLLLQRLAARLGVVTGLHLAEVCNRQYPKVPRLILWLMVELAIIGSDMQEVIGSAIAINLLSVGKIPLWGGVLITIADTFVFLFLDKYGLRKLEALFAFLITIMAVTFGYEYVTVKPDQGQLLKGMFMPYCEGCGPAQLEQAVGIVGAVIMPHNMYLHSALVKSRQVNRAIKKEVSEANKYFFIESCIALFVSFIINVFVVSVFAEAFYKKTNQEVHDICANKSFAQAVLFQSDNSTLDVDIYKGGVILGCYFGPAALYIWAIGILAAGQSSTMTGTYSGQFVMEGFLNLKWS…
XP_026570616.1	MPRGEYKLEYKKDTSGDGVTTIYSNPVSPQSSDSTDEFTTYFDQKIPIPQDEKHPWFSFRKLWAFTGPGFLMSIAYLDPGNIESDLQSGAVAGFKLLWVLLLATVIGLLLQRLAARLGVVTGLHLAEVCNRQYPKVPRLILWLMVELAIIGSDMQEVIGSAIAINLLSVGKIPLWGGVLITIADTFVFLFLDKYGLRKLEALFAFLITIMAVTFGYEYVTVKPDQGQLLKGMFMPYCEGCGPAQLEQAVGIVGAVIMPHNMYLHSALVKSRQVNRAIKKEVSEANKYFFIESCIALFVSFIINVFVVSVFAEAFYKKTNQEVHDICANKSFAQAVLFQSDNSTLDVDIYKGGVILGCYFGPAALYIWAIGILAAGQSSTMTGTYSGQFVMEGFLNLKWS…
XP_026533120.1	MTPGKEREALCEDTSGDGVTSIYSNPVSPQSSDSTDEFTTYFDQKIPIPQDEKHPWFSFRKLWAFTGPGFLMSIAYLDPGNIESDLQSGAVAGFKLLWVLLLATVIGLLLQRLAARLGVVTGLHLAEVCNRQYPKVPRLILWLMVELAIIGSDMQEVIGSAIAINLLSVGKIPLWGGVLITIADTFVFLFLDKYGLRKLEALFAFLITIMAVTFGYEYVTVKPDQGQLLKGMFMPYCEGCGPAQLEQAVGIVGAVIMPHNMYLHSALVKSRQVNRAIKKEVSEANKYFFIESCIALFVSFIINVFVVSVFAEAFYKKTNQEVHDICANKSFAQAVVFQSDNSTIDVDIYKGGVILGCYFGPAALYIWAIGILAAGQSSTMTGTYSGQFVMEGFLNLKWS…
XP_026533123.1	MPRGEYKLEYKKDTSGDGVTSIYSNPVSPQSSDSTDEFTTYFDQKIPIPQDEKHPWFSFRKLWAFTGPGFLMSIAYLDPGNIESDLQSGAVAGFKLLWVLLLATVIGLLLQRLAARLGVVTGLHLAEVCNRQYPKVPRLILWLMVELAIIGSDMQEVIGSAIAINLLSVGKIPLWGGVLITIADTFVFLFLDKYGLRKLEALFAFLITIMAVTFGYEYVTVKPDQGQLLKGMFMPYCEGCGPAQLEQAVGIVGAVIMPHNMYLHSALVKSRQVNRAIKKEVSEANKYFFIESCIALFVSFIINVFVVSVFAEAFYKKTNQEVHDICANKSFAQAVVFQSDNSTIDVDIYKGGVILGCYFGPAALYIWAIGILAAGQSSTMTGTYSGQFVMEGFLNLKWS…
XP_013918359.1	MTPGKEREVLYEDTSGDGVSTIYSNPVSPQASDSTDEFTTYFDQKIPIPEDEKHPWFSFRKLWAFTGPGFLMSIAYLDPGNIESDLQSGAVAGFKLLWVLLLATIIGLLLQRLAARLGVVTGLHLAEVCNRQYPKVPRLILWLMVELAIIGSDMQEVIGSAIAINLLSVGKIPLWGGVLITIADTFVFLFLDKYGLRKLEALFAFLITIMAVTFGYEYITVKPDQGQLLKGMFMPYCEGCGPAQLEQAVGIVGAVIMPHNMYLHSALVKSRQVNRAKKKEVSEANKYFFIESCIALFISFIINVFVVSVFAEAFYKKTNQEVHDICANKSFAQAVVFQSDNSTLDVDIYKGGVILGCYFGPAALYIWAIGILAAGQSSTMTGTYSGQFVMEGFLNLKWS…
XP_015676009.1	MTPGKEREALYEDTSGDGVSTIYSNPITPQASDSADEFTTYFDQKIPIPEDEKHPLFSIRKLWAFTGPGFLMSIAYLDPGNIESDLQSGAVAGFKLLWVLLLATVIGLLLQRLAARLGVVTGLHLAEVCNRQYPKVPRLILWLMVELAIIGSDMQEVIGSAIAINLLSVGKIPLWGGVLITIADTFVFLFLDKYGLRKLEALFAFLITIMAVTFGYEYITVKPDQGQLLKGMFMPYCEGCGTAQLEQAVGIVGAVIMPHNMYLHSALVKSRQVNRAKKKEVSEANKYFFIESCIALFVSFIINVFVVSVFAEAFYKKTNQDVHDICANKSFAQAVLFQADNSTLQVDIYKGGVILGCYFGPAALYIWAIGILAAGQSSTMTGTYSGQFVMEGFLNLKWS…
XP_015676017.1	MSRGEYKLEYKKDTSGDGVSTIYSNPITPQASDSADEFTTYFDQKIPIPEDEKHPLFSIRKLWAFTGPGFLMSIAYLDPGNIESDLQSGAVAGFKLLWVLLLATVIGLLLQRLAARLGVVTGLHLAEVCNRQYPKVPRLILWLMVELAIIGSDMQEVIGSAIAINLLSVGKIPLWGGVLITIADTFVFLFLDKYGLRKLEALFAFLITIMAVTFGYEYITVKPDQGQLLKGMFMPYCEGCGTAQLEQAVGIVGAVIMPHNMYLHSALVKSRQVNRAKKKEVSEANKYFFIESCIALFVSFIINVFVVSVFAEAFYKKTNQDVHDICANKSFAQAVLFQADNSTLQVDIYKGGVILGCYFGPAALYIWAIGILAAGQSSTMTGTYSGQFVMEGFLNLKWS…
ETE70276.1	EDTSGDGVSTIYSNPVSPQSSDSTDEFTTYFDQKIPIPQDEKHPWFSFRKLWAFTGPGFLMSIAYLDPGNIESDLQSGAVAGFKLLWILLLATVIGLLLQRLAARLGVVTGLHLAEVCNRQYPKVPRLILWLMVELAIIGSDMQEVIGSAIAINLLSVGKIPLWGGVLITIADTFVFLFLDKYGLRKLEALFAFLITIMAITFGYEYITVKPDQGQLLKGMFVPYCEGCGPAQLEQAVGIVNRAKKKEVSEANKYFFIESCIALFVSFIINVFVVSVFAEAFYKKTNQEVHDICANKSFAQAVLFQSDNSTLDVDIYKGGVILGCYFGPAALYIWAIGILAAGQSSTMTGTYSGQFVMEGFLNLKWSRFARVVLTRSIAITPTLLVAIFKDVEHLTGMN…
XP_015743698.1	MSLKYLPENCELAAVTGPKDLNSGAKAPTMTPGKEREALYEDTSGDGVNTIYSNPVTPQLMDSADQFTTYFDQKVPIPEDEKHSWFSFRKLWAFTGPGFLMSIAYLDPGNIESDLQSGAVAGFKLLWVLLLATVIGLLLQRLAARLGVVTGLHLAEVCNRQYPKVPRLILWLMVELAIIGSDMQEVIGSAIAINLLSVGRVPLWGGVLITIADTFVFLFLDKYGLRKLEALFGLLITIMAITFGYEYITVKPNQGQLLKGMFMPYCEGCGPAQLEQAVGIVGAVIMPHNMYLHSALVKSRQVNRAKKKEITEANKYFFIESCIALFVSFIINVFVVSVFAEAFYKKTNQEVHDICTNKSFAQAALFQSNNDTLDVDIYKGGVILGCYFGPAALYIWAIG…
XP_025022841.1	MSLKYLPENCELAAVTGPKDLNSGAKAPTMTPGKEREALYEDTSGDGVNTIYSNPVTPQLMDSADQFTTYFDQKVPIPEDEKHSWFSFRKLWAFTGPGFLMSIAYLDPGNIESDLQSGAVAGFKLLWVLLLATVIGLLLQRLAARLGVVTGLHLAEVCNRQYPKVPRLILWLMVELAIIGSDMQEVIGSAIAINLLSVGRVPLWGGVLITIADTFVFLFLDKYGLRKLEALFGLLITIMAITFGYEYITVKPNQGQLLKGMFMPYCEGCGPAQLEQAVGIVGAVIMPHNMYLHSALVKSRQVNRAKKKEITEANKYFFIESCIALFVSFIINVFVVSVFAEAFYKKTNQEVHDICTNKSFAQAALFQSNNDTLDVDIYKGGVILGCYFGPAALYIWAIG…
XP_025022847.1	MTPGKEREALYEDTSGDGVNTIYSNPVTPQLMDSADQFTTYFDQKVPIPEDEKHSWFSFRKLWAFTGPGFLMSIAYLDPGNIESDLQSGAVAGFKLLWVLLLATVIGLLLQRLAARLGVVTGLHLAEVCNRQYPKVPRLILWLMVELAIIGSDMQEVIGSAIAINLLSVGRVPLWGGVLITIADTFVFLFLDKYGLRKLEALFGLLITIMAITFGYEYITVKPNQGQLLKGMFMPYCEGCGPAQLEQAVGIVGAVIMPHNMYLHSALVKSRQVNRAKKKEITEANKYFFIESCIALFVSFIINVFVVSVFAEAFYKKTNQEVHDICTNKSFAQAALFQSNNDTLDVDIYKGGVILGCYFGPAALYIWAIGILAAGQSSTMTGTYSGQFVMEGFLNLKWS…
XP_008101733.1	MPIKQPPTLNCELVNVTPSKDPDSGEKVPTMTPGKEREALYEDSSGDGVSTIYGNPVPAPLSDSTDEFTTYFDQKIPIPEDEKHPWFSFRKLWAFTGPGFLMSIAYLDPGNIESDLQSGSIAGFKLLWVLLLATVIGLLLQRLAARLGVVTGLHLAEVCNRQYPKVPRIILWLMVELAIIGSDMQEVIGSAIAINLLSAGIVPLWGGVLITIADTFVFLFLDKYGLRKLEAFFGFLITIMAVTFGYEYVTVRPDQGQLLKGMFMPYCAGCGAPQLEQAVGIVGAVIMPHNMYLHSALVKSRQVNRANKKEVSEANKYFFIESCIALFVSFIINVFVVSVFAEAFFGKTNEEVYNFCANKSSQAALFPQNNETLDVDIYKGGVVLGCYFGPAALYIWAIG…
XP_008101731.1	MPIKQPPTLNCELVNVTPSKDPDSGEKVPTMTPGKEREALYEDSSGDGVSTIYGNPVPAPLSDSTDEFTTYFDQKIPIPEDEKHPWFSFRKLWAFTGPGFLMSIAYLDPGNIESDLQSGSIAGFKLLWVLLLATVIGLLLQRLAARLGVVTGLHLAEVCNRQYPKVPRIILWLMVELAIIGSDMQEVIGSAIAINLLSAGIVPLWGGVLITIADTFVFLFLDKYGLRKLEAFFGFLITIMAVTFGYEYVTVRPDQGQLLKGMFMPYCAGCGAPQLEQAVGIVGAVIMPHNMYLHSALVKSRQVNRANKKEVSEANKYFFIESCIALFVSFIINVFVVSVFAEAFFGKTNEEVYNFCANKSSQAALFPQNNETLDVDIYKGGVVLGCYFGPAALYIWAIG…
XP_008101734.1	MTPGKEREALYEDSSGDGVSTIYGNPVPAPLSDSTDEFTTYFDQKIPIPEDEKHPWFSFRKLWAFTGPGFLMSIAYLDPGNIESDLQSGSIAGFKLLWVLLLATVIGLLLQRLAARLGVVTGLHLAEVCNRQYPKVPRIILWLMVELAIIGSDMQEVIGSAIAINLLSAGIVPLWGGVLITIADTFVFLFLDKYGLRKLEAFFGFLITIMAVTFGYEYVTVRPDQGQLLKGMFMPYCAGCGAPQLEQAVGIVGAVIMPHNMYLHSALVKSRQVNRANKKEVSEANKYFFIESCIALFVSFIINVFVVSVFAEAFFGKTNEEVYNFCANKSSQAALFPQNNETLDVDIYKGGVVLGCYFGPAALYIWAIGILAAGQSSTMTGTYSGQFVMEGFLNLKWSR…
XP_020640184.1	MTPGKEHEALYEDSSGDGVSTIYSGTAPPQRSDSTDEFTTYFDQKVPIPEDEKHPWFSFRKLWAFTGPGFLMSIAYLDPGNIESDLQSGSVAGFKLLWVLLLSTVIGLLLQRLAARLGVVTGLHLAEVCNRQYPKVPRIILWLMVELAIIGSDMQEVIGSAIAINLLSAGVIPLWGGVLITIADTFVFLFLDKYGLRKLEAFFGFLITIMAITFGYEYVTVRPDQGQLLKGMFVPYCEGCGPPQLEQAVGIVGAVIMPHNMYLHSALVKSRQVNRANKKEVAEANKYFFIESCIALFVSFIINVFVVSVFAEAFFGKLNNDVHEVCANESFSQARLFPENNETLEVDIYKGGVVLGCYFGPAAMYIWAIGILAAGQSSTMTGTYSGQFVMEGFLNLKWS…
XP_028577327.1	MVNVTSSKEPGSTEKSPTMTPGKEREALYEDSSGDGVSTICNTTLPSQLSDSTDEFTTYFDQKIPVPEDEKHPWFSFRKLWAFTGPGFLMSIAYLDPGNIESDLQSGAIAGFKLLWVLLLATIIGLLLQRLAARLGVVTGLHLAEVCNRQYPKVPRIILWLMVELAIVGSDMQEVIGSAIAIHLLSVGIIPLWGGVLITIADTFMFLFLDKYGLRKLEAFFGFLITIMAITFGYEYFRVGPDQGQLLKGMFMPYCEGCGVPQLEQAVGIVGAVIMPHNMYLHSALVKSRQVNRANKKEVSEANKYFFIESCIALFISFIINVFVVSVFAQAFFGKTNKDLQEMCANKTFAPPSLFQSNGTLDVDIYKGGVVLGCSFGPAALYIWAIGILAAGQSSTMTG…
XP_028577328.1	MTPGKEREALYEDSSGDGVSTICNTTLPSQLSDSTDEFTTYFDQKIPVPEDEKHPWFSFRKLWAFTGPGFLMSIAYLDPGNIESDLQSGAIAGFKLLWVLLLATIIGLLLQRLAARLGVVTGLHLAEVCNRQYPKVPRIILWLMVELAIVGSDMQEVIGSAIAIHLLSVGIIPLWGGVLITIADTFMFLFLDKYGLRKLEAFFGFLITIMAITFGYEYFRVGPDQGQLLKGMFMPYCEGCGVPQLEQAVGIVGAVIMPHNMYLHSALVKSRQVNRANKKEVSEANKYFFIESCIALFISFIINVFVVSVFAQAFFGKTNKDLQEMCANKTFAPPSLFQSNGTLDVDIYKGGVVLGCSFGPAALYIWAIGILAAGQSSTMTGTYSGQFVMEGFLNLKWSR…
XP_015276207.1	MPAREVRSEYKKDASGEAVTTVYSNATPPPASDSTDEFTTYFDQKIPIPEDEKHPWFSFRKLWAFTGPGFLMSIAYLDPGNIESDLQSGAVAGFKLLWVLLLATVIGLLLQRLAARLGVVTGLHLAEVCNRQYPKVPRIILWLMVELAIIGSDMQEVIGSAIAIHLLSVGKIPLWGGVLITIADTFMFLFLDKYGLRKLEAFFGFLITVMAIMFGYEYVTAKPNQAELLKGMFVPYCDKCGPPQLEQAVGIVGAVIMPHNMYLHSALVKSRQINRSNKKEVSEANKYFFIESCVALFVSFLINVFVVSVFAEAFFGQTNAEVHNVCANVSIEHAGLFPLNNDTLDVDIYKGGVVLGCYFGPAALYIWAIGILAAGQSSTMTGTYSGQFVMEGFLNLKWS…
XP_015276206.1	MTPGKEREALYEDASGEAVTTVYSNATPPPASDSTDEFTTYFDQKIPIPEDEKHPWFSFRKLWAFTGPGFLMSIAYLDPGNIESDLQSGAVAGFKLLWVLLLATVIGLLLQRLAARLGVVTGLHLAEVCNRQYPKVPRIILWLMVELAIIGSDMQEVIGSAIAIHLLSVGKIPLWGGVLITIADTFMFLFLDKYGLRKLEAFFGFLITVMAIMFGYEYVTAKPNQAELLKGMFVPYCDKCGPPQLEQAVGIVGAVIMPHNMYLHSALVKSRQINRSNKKEVSEANKYFFIESCVALFVSFLINVFVVSVFAEAFFGQTNAEVHNVCANVSIEHAGLFPLNNDTLDVDIYKGGVVLGCYFGPAALYIWAIGILAAGQSSTMTGTYSGQFVMEGFLNLKWS…
XP_023798927.1	MIPFLPAGAPQPHGRRYFLPVFHGCFFAPQFPRIILWLMVELAIIGSDMQEVIGSAIAINLLSMGKIPLWGGVLITIADTFVFLFLDKYGLRKLEAFFGFLITIMALTFGYEYITVKPNQEKLLQGLFIPYCKDCGTPQLEQAVGIVGAVIMPHNMYLHSALVKSRQVNRSDKREVREANKYFFIESCIALFVSFIINIFVVTVFAEAFFNKTNADVHQVCANSSSPHSSLFPNNNETLEVDIYKGGVVLGCYFGPAALYIWAIGILAAGQSSTMTGTYSGQFVMEGFLNLRWSRFARVLLTRSIAVTPTLFVAIFQDVEHLTGMNDFLNVLMSLQLPFALIPVLTFTSLPSVMHDFANGLFWKVAGGLLILLICCINMYFVVAYVMSLHNLGLYIGAA…
KAB0378599.1	MRMQQENTELAPYRVFNETSAMSPPVMRVILPLSPSSSLQVLVRWQRYLVNFNSLLLKSVNSEDAFGDHGDSVSLGAINPAYSNPSIPQSSGGLSEEPFTTYLDENHAVPEECSCFSFRKLWVFTGPGLLMSIVDPGNIECDLQSGALAGFKVPRILLWLMVELAIIGIDMQDVIGSAIAINLLSAGRIPLWGGVLITIADTFAFLFLDNYGLRKLEAFFGFIVTVMALTFGYEYVTVKPSQTQILKGMFLPSCSDCRTPQIMQAVATVGAIITPHNIYLHSALVKSRHIDRAKRQEVQEANKYFFIDCCIALFVSFIINTCVISVFAEAFFEKTNEQVVVVCKNSSSAHTHLFPDDNSTLTVDIYKGGVVLGCYFGPVALYIWAVGILAAGQSSTMTG…
XP_023956689.1	MLWLMIELAIIGSDMQEVIGSAIAINLLSAGKVPLWGGVLITIADTFMFLFLDKYGLRKLEAFFGFLITIMALTFGYEYVTVKPDQGKLLKGMFMPYCDKCGTPQLEQAVGIVGAVIMPHNMYLHSALVKSRQVNRADKKEVQEANKYFFIESCVALFVSFLINVFVVSVFAEAFFGKTNEQVYKVCTNSSSPHAGLFPNNNETLEVDIYKGGVVLGCYFGPAALYIWAVGILAAGQSSTMTGTYSGQFVMEGFLNLKWSRFARVILTRSIAITPTLLVAIFQDVEHLTGMNDFLNVLQSLQLPFALIPVLTFTSLHPVMNDFANGLGWKIAGSVLILIVCSINMYFVAVYVTALGHLALYVVAAVVCVAYLCFVAYLSWLCLIALGISFLACGQTYQL…
XP_023956688.1	MLWLMIELAIIGSDMQEVIGSAIAINLLSAGKVPLWGGVLITIADTFMFLFLDKYGLRKLEAFFGFLITIMALTFGYEYVTVKPDQGKLLKGMFMPYCDKCGTPQLEQAVGIVGAVIMPHNMYLHSALVKSRQVNRADKKEVQEANKYFFIESCVALFVSFLINVFVVSVFAEAFFGKTNEQVYKVCTNSSSPHAGLFPNNNETLEVDIYKGGVVLGCYFGPAALYIWAVGILAAGQSSTMTGTYSGQFVMEGFLNLKWSRFARVILTRSIAITPTLLVAIFQDVEHLTGMNDFLNVLQSLQLPFALIPVLTFTSLHPVMNDFANGLGWKIAGSVLILIVCSINMYFVAVYVTALGHLALYVVAAVVCVAYLCFVAYLSWLCLIALGISFLACGQTLSL…
XP_029450803.1	MVDVVYCQDLETMTTMTQDQQQITVDENASGDGVRNGDVGVLTSTYSSIPTALEPAEEPFATYFDEKVPIPENEKYPRFSFRKLWAFTGPGFLMSIAYLDPGNIESDLQSGAVAGFKLLWVLLTATIIGLLLQRLAARLGVVTGLHLAEVCNRQYPKAPRILLWLMVELAIIGSDMQEVIGSAIAINLLSVGIIPLWGGVLITIIDTFVFLFLDKYGLRKLEAFFGFLITIMAITFGYEYIRVRPDQGQLLKGMFVPYCEGCGPPQLEQAVGIVGAVIMPHNMYLHSALVKSREVNRANKKEVREANKYFFIESSIALFVSFIINVFVVSVFAEAFFGQTNNQVHEVCVNHSSPHSNLFPNDTKTLEVDIYKGGVVLGCYFGPAALYIWAVGILAAGQS…
XP_029450802.1	MKDKKTEFSSPCELVDVVYCQDLETMTTMTQDQQQITVDENASGDGVRNGDVGVLTSTYSSIPTALEPAEEPFATYFDEKVPIPENEKYPRFSFRKLWAFTGPGFLMSIAYLDPGNIESDLQSGAVAGFKLLWVLLTATIIGLLLQRLAARLGVVTGLHLAEVCNRQYPKAPRILLWLMVELAIIGSDMQEVIGSAIAINLLSVGIIPLWGGVLITIIDTFVFLFLDKYGLRKLEAFFGFLITIMAITFGYEYIRVRPDQGQLLKGMFVPYCEGCGPPQLEQAVGIVGAVIMPHNMYLHSALVKSREVNRANKKEVREANKYFFIESSIALFVSFIINVFVVSVFAEAFFGQTNNQVHEVCVNHSSPHSNLFPNDTKTLEVDIYKGGVVLGCYFGPAAL…
XP_029450804.1	MTTMTQDQQQITVDENASGDGVRNGDVGVLTSTYSSIPTALEPAEEPFATYFDEKVPIPENEKYPRFSFRKLWAFTGPGFLMSIAYLDPGNIESDLQSGAVAGFKLLWVLLTATIIGLLLQRLAARLGVVTGLHLAEVCNRQYPKAPRILLWLMVELAIIGSDMQEVIGSAIAINLLSVGIIPLWGGVLITIIDTFVFLFLDKYGLRKLEAFFGFLITIMAITFGYEYIRVRPDQGQLLKGMFVPYCEGCGPPQLEQAVGIVGAVIMPHNMYLHSALVKSREVNRANKKEVREANKYFFIESSIALFVSFIINVFVVSVFAEAFFGQTNNQVHEVCVNHSSPHSNLFPNDTKTLEVDIYKGGVVLGCYFGPAALYIWAVGILAAGQSSTMTGTYSGQFV…
XP_029450807.1	MSENRPFKNASGDGVRNGDVGVLTSTYSSIPTALEPAEEPFATYFDEKVPIPENEKYPRFSFRKLWAFTGPGFLMSIAYLDPGNIESDLQSGAVAGFKLLWVLLTATIIGLLLQRLAARLGVVTGLHLAEVCNRQYPKAPRILLWLMVELAIIGSDMQEVIGSAIAINLLSVGIIPLWGGVLITIIDTFVFLFLDKYGLRKLEAFFGFLITIMAITFGYEYIRVRPDQGQLLKGMFVPYCEGCGPPQLEQAVGIVGAVIMPHNMYLHSALVKSREVNRANKKEVREANKYFFIESSIALFVSFIINVFVVSVFAEAFFGQTNNQVHEVCVNHSSPHSNLFPNDTKTLEVDIYKGGVVLGCYFGPAALYIWAVGILAAGQSSTMTGTYSGQFVMEGFLNL…
XP_030054148.1	MLLAALIGAPLLQIDVVYCQDLGPTPATSNMAQVQQQITVDENASGDRVRNGEVDVLTSTYSSIPAELESSEEPFATYFDEKVPIPEDEKYPRFSFRKLWAFTGPGFLMSIAYLDPGNIESDLQSGAVAGFKLLWVLLTATVIGLLLQRLAARLGVVTGLHLAEVCNRQYPKVPRIFLWLMVELAIIGSDMQEVIGSAIAINLLSVGVIPLWGGVLITIIDTFVFLFLDKYGLRKLEALFGFLITIMAVTFGYEYVRVRPNQGELLKGMFVPYCQGCGPPQLEQAVGIVGAVIMPHNMYLHSALVKSREVNRANKKEVREANKYFFIESSIALFVSFIINVFVVSVFAEAFFGRSNSQVYEVCKNNSSPHSKLFPNNNETLEVDIYKGGVVLGCYFGPA…
XP_030054149.1	MAQVQQQITVDENASGDRVRNGEVDVLTSTYSSIPAELESSEEPFATYFDEKVPIPEDEKYPRFSFRKLWAFTGPGFLMSIAYLDPGNIESDLQSGAVAGFKLLWVLLTATVIGLLLQRLAARLGVVTGLHLAEVCNRQYPKVPRIFLWLMVELAIIGSDMQEVIGSAIAINLLSVGVIPLWGGVLITIIDTFVFLFLDKYGLRKLEALFGFLITIMAVTFGYEYVRVRPNQGELLKGMFVPYCQGCGPPQLEQAVGIVGAVIMPHNMYLHSALVKSREVNRANKKEVREANKYFFIESSIALFVSFIINVFVVSVFAEAFFGRSNSQVYEVCKNNSSPHSKLFPNNNETLEVDIYKGGVVLGCYFGPAALYIWAVGILAAGQSSTMTGTYSGQFVMEG…
XP_030054151.1	MSENHPIKNASGDRVRNGEVDVLTSTYSSIPAELESSEEPFATYFDEKVPIPEDEKYPRFSFRKLWAFTGPGFLMSIAYLDPGNIESDLQSGAVAGFKLLWVLLTATVIGLLLQRLAARLGVVTGLHLAEVCNRQYPKVPRIFLWLMVELAIIGSDMQEVIGSAIAINLLSVGVIPLWGGVLITIIDTFVFLFLDKYGLRKLEALFGFLITIMAVTFGYEYVRVRPNQGELLKGMFVPYCQGCGPPQLEQAVGIVGAVIMPHNMYLHSALVKSREVNRANKKEVREANKYFFIESSIALFVSFIINVFVVSVFAEAFFGRSNSQVYEVCKNNSSPHSKLFPNNNETLEVDIYKGGVVLGCYFGPAALYIWAVGILAAGQSSTMTGTYSGQFVMEGFLNL…
EAW58161.1	MVELAIIGSDMQEVIGSAIAINLLSVGRIPLWGGVLITIADTFVFLFLDKYGLRKLEAFFGFLITIMALTFGYEYVTVKPSQSQVLKGMFVPSCSGCRTPQIEQAVGIVGAVIMPHNMYLHSALVKSRQVNRNNKQEVREANKYFFIESCIALFVSFIINVFVVSVFAEAFFGKTNEQVVEVCTNTSSPHAGLFPKDNSTLAVDIYKGGVVLGCYFGPAALYIWAVGILAAGQSSTMTGTYSGQFVMEGFLNLKWSRFARVVLTRSIAIIPTLLVAVFQDVEHLTGMNDFLNVLQSLQLPFALIPILTFTSLRPVMSDFANGLGWRIAGGILVLIICSINMYFVVVYVRDLGHVALYVVAAVVSVAYLGFVFYLGWQCLIALGMSFLDCGHTVSISKGL…
XP_019479418.1	MKKQHKTEAAPQCELKSCSKNTMVWGTEQKMPDDDTSEDHGDFISGGAINPAYSNSSLRQSTGHSEEPFTTYFDEKITIPEEEYSCFSFRKLWAFTGPGFLMSIAYLDPGNIESDLQSGAVAGFKLLWVLLLATIVGLLLQRLAARLGVVTGLHLAEVCHRQYPKVPRIILWLMVELAIIGSDMQEVIGSAIAINLLTVGRVPLWGGVLITIVDTFVFLFLDKYGLRKLEAFFGFLITIMALTFGYEYVTVRPNQIEVLKGMFLPSCSGCGTPQIQQAVGIVGAVIMPHNMYLHSALVKSRQVNRAKKQEVREANKYFFIESCIALFVSFIINVFVVSVFAEAFFGKTNQQVIEVCRNSSSPHAGIFPEDNSTLAVDIYKGVSLFRFVFFDPNQCSWHS…
XP_027529511.1	AGRGSHSCTRDHHSPVGGDIFPCFSWLWVFLSPQFPRIILWLMVELAIIGSDMQEVIGSAIAINLLSVGKIPLWGGVLITIADTFVFLFLDKYGLRKLEAFFGFLITIMALTFGYEYITVKPNQEKVLQGLFIPYCKDCGTPQLEQAVGIVGAVIMPHNMYLHSALVKSRQVDRSDKRQVREANKYFFIESCIALFVSFIINIFVVSVFAEAFFNKTNADVNQVCVNSSSPHSSLFPNNNETLEVDIYKGGVVLGCYFGPAALYIWAIGILAAGQSSTMTGTYSGQFVMEGFLNLRWSRFARVLLTRSIAVTPTLFVAIFQDVEHLTGMNDFLNVLMSLQLPFALIPVLTFTSLPSVMHDFANGLFWKVAGGLLILLVCCINMYFVVAYVRDLHNLGLY…
KFQ56927.1	FSFRKLWAFTGPGFLMSIAYLDPGNIESDLQSGAVAGFKLLWVLMLATVIGLLLQRLAARLGVVTGLHLAEVCNRQYQKVPRIILWLMVELAIIGSDMQEVIGSAIAINLLSMGKIPLWGGVLITIADTFVFLFLDKYGLRKLEAFFGFLITIMALTFGYEYITVRPNQEKLLKGLFVPYCQDCGTPQLEQAVGIVGAVIMPHNMYLHSALVKSRQVNRANKREVQEANKYFFIESCIALFVSFIINIFVVTVFAEAFFEKNNADVNAVCVNASSPHSSLFPSNNQTLEVDIYKGGVVLGCYFGPAALYIWAIGILAAGQSSTMTGTYSGQFVMEGFLNLRWSRFARVLLTRSIAITPTLFVAIFQDVEHLTGMNDFLNVLMSLQLPFALIPVLTFTSL…
XP_012811868.1	MSDQNYQQLDEDLSGETLSKQNLSDTSPEPAVEVEPFATYFDEKIPIPEDETHSWFSFRKLWAFTGPGFLMSIAYLDPGNIESDLQSGSVAGFKLLWVLLAATIIGLLLQRLAARLGVVTGLHLAEVCNRQYPKVPRIILWLMVELAIIGSDMQEVIGSAIALNLLSAGIIPLWGGVLITIIDTFFFLFLDKYGLRKLEAFFGFLITIMALTFGYEYVRVSPNQGELLKGMFFPYCKDCGAPQLEQAVGIVGAVIMPHNMYLHSALVKSREINRANKKEVREANKYFFIESSIALFISFLINVFVVAVFAEAFYGKTNQEVFNECLNKSSPQSNLFPNNTDPLQVDIFKGGVVLGCFFGAPALYIWAVGILAAGQSSTMTGTYSGQFVMEGFLNLKWSR…
XP_012811870.1	MSDQNYQQLDDLSGETLSKQNLSDTSPEPAVEVEPFATYFDEKIPIPEDETHSWFSFRKLWAFTGPGFLMSIAYLDPGNIESDLQSGSVAGFKLLWVLLAATIIGLLLQRLAARLGVVTGLHLAEVCNRQYPKVPRIILWLMVELAIIGSDMQEVIGSAIALNLLSAGIIPLWGGVLITIIDTFFFLFLDKYGLRKLEAFFGFLITIMALTFGYEYVRVSPNQGELLKGMFFPYCKDCGAPQLEQAVGIVGAVIMPHNMYLHSALVKSREINRANKKEVREANKYFFIESSIALFISFLINVFVVAVFAEAFYGKTNQEVFNECLNKSSPQSNLFPNNTDPLQVDIFKGGVVLGCFFGAPALYIWAVGILAAGQSSTMTGTYSGQFVMEGFLNLKWSRF…
OCA46562.1	MSDQNYQQLDDLSGETLSKQNLSDTSPEPAVEVEPFATYFDEKIPIPEDETHSWFSFRKLWAFTGPGFLMSIAYLDPGNIESDLQSGSVAGFKLLWVLLAATIIGLLLQRLAARLGVVTGLHLAEVCNRQYPKVPRIILWLMVELAIIGSDMQEVIGSAIALNLLSAGIIPLWGGVLITIIDTFFFLFLDKYGLRKLEAFFGFLITIMALTFGYEYVRVSPNQGELLKGMFFPYCKDCGAPQLEQAVGIVGAVIMPHNMYLHSALVKSREINRANKKEVREANKYFFIESSIALFISFLINVFVVAVFAEAFYGKTNQEVFNECLNKSSPQSNLFPNNTDPLQVDIFKGGVVLGCFFGAPALYIWAVGILAAGQSSTMTGTYSGQFVMEGFLNLKWSRF…
NP_001116938.1	MSDQNYQQLDEDLSGETLSKQNLSDTSPEPAVEVEPFATYFDEKIPIPEDETHSWFSFRKLWAFTGPGFLMSIAYLDPGNIESDLQSGSVAGFKLLWVLLAATIIGLLLQRLAARLGVVTGLHLAEVCNRQYPKVPRIILWLMVELAIIGSDMQEVIGSAIALNLLSAGIIPLWGGVLITIIDTFFFLFLDKYGLRKLEAFFGFLITIMALTFGYEYVRVSPNQGELLKGMFFPYCKDCGAPQLEQAVGIVGAVIMPHNMYLHSALVKSREINRANKKEVREANKYFFIESSIALFISFLINVFVVAVFAEAFYGKTNQEVFNECLNKSSPQSNLFPNNTDPLQVDIFKGGVVLGCFFGAPALYIWAVGILAAGQSSTMTGTYSGQFVMEGFLNLKWSR…
XP_018102978.1	MSDQNYQQLDDLSVESRPKRILSDDSPEPVVDAEPFATYFDEKIPIPEDETHSWFSFRKLWAFTGPGFLMSIAYLDPGNIESDLQSGSVAGFKLLWVLLAATIIGLLLQRLAARLGVVTGLHLAEMCNRQYPKVPRIALWLMVELAIIGSDMQEVIGSAIALNLLSAGVIPLWGGVLITIIDTFFFLFLDKYGLRKLEAFFGFLITVMALTFGYEYIRVSPNQGELLKGMFFPYCKDCGAPQLEQAVGIVGAVIMPHNMYLHSALVKSRDINRANKKEVREANKYFFIESTIALFVSFLINVFVVAVFAESFYGKTNQEVFYECLNKSSPQSNLFPNNTDPLHVDIFKGGVVLGCFFGAPALYIWAVGILAAGQSSTMTGTYSGQFVMEGFLNLKWSRF…
XP_018102977.1	MSDQNYQQLDEDLSVESRPKRILSDDSPEPVVDAEPFATYFDEKIPIPEDETHSWFSFRKLWAFTGPGFLMSIAYLDPGNIESDLQSGSVAGFKLLWVLLAATIIGLLLQRLAARLGVVTGLHLAEMCNRQYPKVPRIALWLMVELAIIGSDMQEVIGSAIALNLLSAGVIPLWGGVLITIIDTFFFLFLDKYGLRKLEAFFGFLITVMALTFGYEYIRVSPNQGELLKGMFFPYCKDCGAPQLEQAVGIVGAVIMPHNMYLHSALVKSRDINRANKKEVREANKYFFIESTIALFVSFLINVFVVAVFAESFYGKTNQEVFYECLNKSSPQSNLFPNNTDPLHVDIFKGGVVLGCFFGAPALYIWAVGILAAGQSSTMTGTYSGQFVMEGFLNLKWSR…
OCT95787.1	MSDQNYQQLDEDLSVESRPKRILSDDSPEPVVDAEPFATYFDEKIPIPEDETHSWFSFRKLWAFTGPGFLMSIAYLDPGNIESDLQSGSVAGFKLLWVLLAATIIGLLLQRLAARLGVVTGLHLAEMCNRQYPKVPRIALWLMVELAIIGSDMQEVIGSAIALNLLSAGVIPLWGGVLITIIDTFFFLFLDKYGLRKLEAFFGFLITVMALTFGYEYIRVSPNQGELLKGMFFPYCKDCGAPQLEQAVGIVGAVIMPHNMYLHSALVKSRDINRANKKEVREANKYFFIESTIALFVSFLINVFVVAVFAESFYGKTNQEVFYECLNKSSPQSNLFPNNTDPLHVDIFKGGVVLGCFFGAPALYIWAVGILAAGQSSTMTGTYSGQFVMEGFLNLKWSR…
XP_018417614.1	MSDQNYRQLDESGSEDHGSKPDLSDSLEPVVEGEPFTSYFDEKISIPEDGGQWFSFRKLWAFTGPGFLMSIAYLDPGNIESDLQSGSVAGFKLLWVLLTATVIGLLLQRLAARLGVVTGLHLAEMCNRQYPKVPRIMLWLMVELAIIGSDMQEVIGSAIALNLLSVGIIPLWGGVLITIVDTFFFLFLDKYGLRKLEAFFAVLITVMAVTFGYEYVRVRPDQGQLLKGMFFPYCADCGTPQLEQAVGIVGAVIMPHNMYLHSALVKSREVNRANKKEVREANKYFFIESTLALFLSFIINVFVVAVFAQAFYNKTNEEVLNECINKTIGGQSAMLFPNNNETLNVDIYKGGVVLGCYFGAPALYIWAVGILAAGQSSTMTGTYSGQFVMEGFLNLKWSR…
KFP17381.1	FSFRKLWAFTGPGFLMSIAYLDPGNIESDLQSGAVAGFKLLWVLMLATIIGLLLQRLAARLGVPRIVLWLMVELAIIGSDMQEVIGSAIAINLLSVGKIPLWGGVLITIADTFVFLFLDKYGLRKLEAFFGFLITIMALTFGYEYVTVKPNQEKLLKGLFIPYCQNCGTRQLEQAVGIVGAVIMPHNMYLHSALVKSRQVNRANKREVREANKYFFIESCIALFVSFIINIFVVTVFAEAFFEKTNADVNDVCVNASSPHSSLFPSNNQTLEVDIYKGGVVLGCYFGPAALYIWAIGILAAGQSSTMTGTYSGQFVMEGFLNLRWSRFARVLLTRSIAITPTLFVAIFQDVEHLTGMNDFLNVLMSLQLPFALIPILTFTSLPSVMNDFANGL
XP_017584198.1	MPLRTCKGSERTSLVGITQRVHPSCRRPCSQMHRHLPRPLPPLPVNAAKRRGMVCPSPGLSSQGQSSSSEEEQHGGEPDLLWLADLTGAHIGLAPICEDPEDRCSIWENLVSLVDFQCPGFPLTSEELCQYIDIPHTPTSSSTTCTSTVTTRQAVPQPPLPTGDIDYKSNAHVRPPYSYATLICMAMEASKKPKITLAAICKWISDNFCYFRRADPSWQSSIRHNLCINKRFIKVPREKGEPGRGAFWKLHPRYAEQLQSSTSKELPEPASTKRAQQEAQRVLSPATLACSSQSSLEVGAELQQLLQEFEEFESSHSWNPVENEAGQQQQHNQPWPTPLAEVFHRQSQKFPRIILWLMVELAIIGSDMQEVIGSAIAINLLSVGKIPLWGGVLITIADT…
XP_006870197.1	MSIAYLDPGNIESDLQSGAVAGFKLLWVLLLAIIVGLLLQRLAARLGVVTGLHLAEVCYQQYPKVPRIILWLMVELAIIGSDMQEVIGSAIAINLLSVGRVPLWAGVLITIADTFVFLFLDKYGLRKLEAFFGFLITIMAFTFGYEYVTVKPSQSQVLKGMFVPSCSGCSIPQVMQAVGIVGANLMPHNIYLHSALVKSRQVNRANKQEVQEANKYFFIESSIAVFVAFIINVFVVSVFAEAFFLKTSGQVVQVCKNSSFPISDDLFLDHNSTLLVDIYKGGLMLGCYFGPAALYIWAVGILAAGQSSTMTGTYSGQFVMEGFMNLKWPRFARMILTRSIAIIPTLLVAAFQDVEHLTGLNDFLNVLQSLLLPFALIPILTFTSLRPVMSDFANGIGWK…
AEC05339.1	MKEGKNEKSTLKDSPQDNGVQTNQYSSISPPASPVAQEEPFSTYFEDKVAIPENVNQVFSFRKLWAFTGPGFLMSIAYLDPGNIESDLQSGAKAGFKLLWVLLVATIIGLLLQRLAARLGVVTGMHLAEVCNRQYPTVPRVILWLMVELAIIGSDMQEVIGCAIALNLLSVGRIPLWAGVLITITDTFVFLFLDKYGLRKLEAFFGFLITVMALSFGYEYVLVKPDQGELLKGMFLPYCAGCGPVQLEQAVGIVGAVIMPHNIYLHSALVKSRDIDRKNKKEVKEANKYYFIESTIALFISFLINVFVVAVFAEAFYNKTNMEVHEFCNKTGSPHSGLFPQDNNTLEVDIYKGGVVLGCVFGPAALYIWAIGILAAGQSSTMTGTYSGQFVMEGFLNLR…
AEC05338.1	MKAEQDGDLLEEDSPQDNGVQTNQYSSISPPASPVAQEEPFSTYFEDKVAIPENVNQVFSFRKLWAFTGPGFLMSIAYLDPGNIESDLQSGAKAGFKLLWVLLVATIIGLLLQRLAARLGVVTGMHLAEVCNRQYPTVPRVILWLMVELAIIGSDMQEVIGCAIALNLLSVGRIPLWAGVLITITDTFVFLFLDKYGLRKLEAFFGFLITVMALSFGYEYVLVKPDQGELLKGMFLPYCAGCGPVQLEQAVGIVGAVIMPHNIYLHSALVKSRDIDRKNKKEVKEANKYYFIESTIALFISFLINVFVVAVFAEAFYNKTNMEVHEFCNKTGSPHSGLFPQDNNTLEVDIYKGGVVLGCVFGPAALYIWAIGILAAGQSSTMTGTYSGQFVMEGFLNLR…
AEC05337.1	MKEGKNEKSTLKDSPQDNGVQTNQYSSISPPASPVAQEEPFSTYFEDKVAIPENVNQVFSFRKLWAFTGPGFLMSIAYLDPGNIESDLQSGAKAGFKLLWVLLVATIIGLLLQRLAARLGVVTGMHLAEVCNRQYPTVPRVILWLMVELAIIGSDMQEVIGCAIALNLLSVGRIPLWAGVLITITDTFVFLFLDKYGLRKLEAFFGFLITVMALSFGYEYVLVKPDQGELLKGMFLPYCAGCGPVQLEQAVGIVGAVIMPHNIYLHSALVKSRDIDRKNKKEVKEANKYYFIESTIALFISFLINVFVVAVFAEAFYNKTNMEVHEFCNKTGSPHSGLFPQDNNTLEVDIYKGGVVLGCVFGPAALYIWAIGILAAGQSSTMTGTYSGQFVMEGFLNLR…
AEC05336.1	MKAEQDGDLLEEDSPQDNGVQTNQYSSISPPASPVAQEEPFSTYFEDKVAIPENVNQVFSFRKLWAFTGPGFLMSIAYLDPGNIESDLQSGAKAGFKLLWVLLVATIIGLLLQRLAARLGVVTGMHLAEVCNRQYPTVPRVILWLMVELAIIGSDMQEVIGCAIALNLLSVGRIPLWAGVLITITDTFVFLFLDKYGLRKLEAFFGFLITVMALSFGYEYVLVKPDQGELLKGMFLPYCAGCGPVQLEQAVGIVGAVIMPHNIYLHSALVKSRDIDRKNKKEVKEANKYYFIESTIALFISFLINVFVVAVFAEAFYNKTNMEVHEFCNKTGSPHSGLFPQDNNTLEVDIYKGGVVLGCVFGPAALYIWAIGILAAGQSSTMTGTYSGQFVMEGFLNLR…
AAG31225.2	MKRGKNEKSTLKDSPQDNGVQTNQYSSISPPASPVAQEEPFSTYFEDKVAIPESVNQVFSFRKLWAFTGPGFLMSIAYLDPGNIESDLQSGAKAGFKLLWVLLVATIIGLLLQRLAARLGVVTGMHLAEVCNRQYPTVPRVILWLMVELAIIGSDMQEVIGCAIALNLLSVGRIPLWGGVLITITDTFVFLFLDKYGLRKLEAFFGFLITVMALSFGYEYVLVKPDQGELLKGMFLPYCAGCGPVQLEQAVGIVGAVIMPHNIYLHSALVKSRDIDRKNKKEVKEANKYYFIESTIALFISFLINVFVVAVFAEAFYNKTNMEVHEFCNKTGSPHSDLFPQNNNTLEVDIYKGGVVLGCVFGPAALYIWAIGILAAGQSSTMTGTYSGQFVMEGFLNLR…
XP_030275982.1	MKEGETERSKLKDSPQDNGVQTNQYSSISPPASPVAQEEPFSTYFEDKVHIPEDVSQVFSFRKLWAFTGPGFLMSIAYLDPGNIESDLQSGAKAGFKLLWVLLGATIIGLLLQRLAARLGVVTGMHLAEVCNRQYPTVPRIILWMMVELAIIGSDMQEVIGCAIALNLLSVGRIPLWAGVLITITDTFVFLFLDKYGLRKLEAFFGFLITVMALSFGYEYVLVKPNQAELLKGMFLPYCAGCGPVQLEQAVGIVGAVIMPHNIYLHSALVKSRDIDRKNKKEVKEANKYFFIESTIALFISFLINVFVVAVFAQAFYNKTNADVNESCNKTGSPHTDLFPLNNNTLEVDIYKGGVVLGCVFGPAALYIWAIGILAAGQSSTMTGTYSGQFVMEGFLNLR…
XP_030275981.1	MKAEQDGDLLEEDSPQDNGVQTNQYSSISPPASPVAQEEPFSTYFEDKVHIPEDVSQVFSFRKLWAFTGPGFLMSIAYLDPGNIESDLQSGAKAGFKLLWVLLGATIIGLLLQRLAARLGVVTGMHLAEVCNRQYPTVPRIILWMMVELAIIGSDMQEVIGCAIALNLLSVGRIPLWAGVLITITDTFVFLFLDKYGLRKLEAFFGFLITVMALSFGYEYVLVKPNQAELLKGMFLPYCAGCGPVQLEQAVGIVGAVIMPHNIYLHSALVKSRDIDRKNKKEVKEANKYFFIESTIALFISFLINVFVVAVFAQAFYNKTNADVNESCNKTGSPHTDLFPLNNNTLEVDIYKGGVVLGCVFGPAALYIWAIGILAAGQSSTMTGTYSGQFVMEGFLNLR…
XP_030275983.1	MKAEQDGDLLEEDSPQDNGVQTNQYSSISPPASPVAQEEPFSTYFEDKVHIPEDVSQVFSFRKLWAFTGPGFLMSIAYLDPGNIESDLQSGAKAGFKLLWVLLGATIIGLLLQRLAARLGVVTGMHLAEVCNRQYPTVPRIILWMMVELAIIGSDMQEVIGCAIALNLLSVGRIPLWAGVLITITDTFVFLFLDKYGLRKLEAFFGFLITVMALSFGYEYVLVKPNQAELLKGMFLPYCAGCGPVQLEQAVGIVGAVIMPHNIYLHSALVKSRDIDRKNKKEVKEANKYFFIESTIALFISFLINVFVVAVFAQAFYNKTNADVNESCNKTGSPHTDLFPLNNNTLEVDIYKGGVVLGCVFGPAALYIWAIGILAAGQSSTMTGTYSGQFVMEGFLNLR…
AAR83912.1	MKAEQDGDLLEEDSPQDNGVQTNQYSSISPPASPVAQDEPFSTYFEEKVHIPENVSQVFSFRKLWAFTGPGFLMSIAYLDPGNIESDLQSGAKAGFKLLWVLLGATIIGLLLQRLAARRRVVTGMHLAEVCNRQYPTVPRIILWLMVELAIIGSDMQEVIGCAIALNLLSVGRIPLWAGVLITITDTFVFLFLDKYGLRKLEAFFGFLITVMAISFGYEYVLVKPNQAELLKGMFLPYCAGCGPLQLEQAVGIVGAVIMPHNIYLHSALVKSREIDRKNKKEVKEANKYFFIESTIALFISFLINVFVVAVFAQAFYNKTNADVNESCNKTGSPHTDLFPLNNKTLEVDIYKGGVVLGCVFGPAALYILAIGILAAGQSSTMTGTYSGQFAMEGFLNLR…
XP_019112422.1	MKAEQDGDLLEEDSPQDNGVQTNQYSAISPPASPDTQDEPFSTYFEEKVAIPSDVSQVFSFRKLWAFTGPGFLMSIAYLDPGNIESDLQSGAKAGFKLLWVLLGATIIGLLLQRLAARLGVVTGMHLAEVCNRQYPTVPRVILWLMVELAIIGSDMQEVIGCAIALNLLSVGRIPLWAGVLITITDTFVFLFLDKYGLRKLEAFFGFLITIMALSFGYEYVLVKPDQGELLKGMFLPYCAGCGPVQLEQAVGIVGAVIMPHNIYLHSALVKSRDIDRKNKKDVKEANKYFFIESTIALFISFLINVFVVAVFAQAFYNKTNIEVNALCNATGSPHTNLFPLNNGTLEVDIYKGGVVLGCFFGPAALYIWAIGILAAGQSSTMTGTYSGQFVMEGFLNLR…
XP_019112424.1	MKREKTEKSKLKDSPQDNGVQTNQYSAISPPASPDTQDEPFSTYFEEKVAIPSDVSQVFSFRKLWAFTGPGFLMSIAYLDPGNIESDLQSGAKAGFKLLWVLLGATIIGLLLQRLAARLGVVTGMHLAEVCNRQYPTVPRVILWLMVELAIIGSDMQEVIGCAIALNLLSVGRIPLWAGVLITITDTFVFLFLDKYGLRKLEAFFGFLITIMALSFGYEYVLVKPDQGELLKGMFLPYCAGCGPVQLEQAVGIVGAVIMPHNIYLHSALVKSRDIDRKNKKDVKEANKYFFIESTIALFISFLINVFVVAVFAQAFYNKTNIEVNALCNATGSPHTNLFPLNNGTLEVDIYKGGVVLGCFFGPAALYIWAIGILAAGQSSTMTGTYSGQFVMEGFLNLR…
XP_019112427.1	MKREKTEKSKLKDSPQDNGVQTNQYSAISPPASPDTQDEPFSTYFEEKVAIPSDVSQVFSFRKLWAFTGPGFLMSIAYLDPGNIESDLQSGAKAGFKLLWVLLGATIIGLLLQRLAARLGVVTGMHLAEVCNRQYPTVPRVILWLMVELAIIGSDMQEVIGCAIALNLLSVGRIPLWAGVLITITDTFVFLFLDKYGLRKLEAFFGFLITIMALSFGYEYVLVKPDQGELLKGMFLPYCAGCGPVQLEQAVGIVGAVIMPHNIYLHSALVKSRDIDRKNKKDVKEANKYFFIESTIALFISFLINVFVVAVFAQAFYNKTNIEVNALCNATGSPHTNLFPLNNGTLEVDIYKGGVVLGCFFGPAALYIWAIGILAAGQSSTMTGTYSGQFVMEGFLNLR…
TKS71491.1	MKAEQDGDLLEEDSPQDNGVQTNQYSAISPPASPDTQDEPFSTYFEEKVTIPSDVSQVFSFRKLWAFTGPGFLMSIAYLDPGNIESDLQSGAKAGFKLLWVLLGATIIGLLLQRLAARLGVVTGMHLAEVCNRQYPTVPRVILWLMVELAIIGSDMQEVIGCAIALNLLSVGRIPLWAGVLITITDTFVFLFLDKYGLRKLEAFFGFLITIMALSFGYEYVLVKPDQGELLKGMFLPYCAGCGPVQLEQAVGIVGAVIMPHNIYLHSALVKSRDIDRKNKKDVKEANKYFFIESTIALFISFLINVFVVAVFAQAFYNKTNIEVNALCNATGSPHTNLFPLNNGTLEVDIYKGGVVLGCFFGPAALYIWAIGILAAGQSSTMTGTYSGQFVMEGFLNLR…
AHB33812.1	MKAEQDGDLLEEDSPEENGVQTNQYSSISPPASPDGQDEPFSTYFEEKVAIPSDVSQVFSFRKLWAFTGPGFLMSIAYLDPGNIESDLQSGAKAGFKLLWVLLGATIIGLLLQRLAARLGVVTGMHLAEVCNRQYPTVPRVILWLMVELAIIGSDMQEVIGCAIAFNLLSVGRIPLWAGVLITITDTFVFLFLDKYGLRKLEAFFGFLITIMALSFGYEYVLVKPDQGELLKGMFLPYCAGCGPVQLEQAVGIVGAVIMPHNIYLHSALVKSRDIDRKNKKDVKEANKYFFIESTIALFISFLINVFVVAVFAQAFYNKTNIEVNALCNMTGSPHTNLFPLNNGTLEVDIYKGGVVLGCFFGPAALYIWAIGILAAGQSSTMTGTYSGQFVMEGFLNLR…
TMS19675.1	MKAEQDGDLLEEDSPQDNGVQTNQYSAISPPASPDTQDEPFSTYFEEKVAIPSDVSQVFSFRKLWAFTGPGFLMSIAYLDPGNIESDLQSGAKAGFKVPRVILWLMVELAIIGSDMQEVIGCAIALNLLSVGRIPLWAGVLITITDTFVFLFLDKYGLRKLEAFFGFLITIMALSFGYEYVLVKPDQGELLKGMFLPYCAGCGPVQLEQAVGIVGAVIMPHNIYLHSALVKSRDIDRKNKKDVKEANKYFFIESTIALFISFLINVFVVAVFAQAFYNKTNIEVNALCNATGSPHTNLFPLNNGTLEVDIYKGGVVLGCFFGPAALYIWAIGILAAGQSSTMTGTYSGQFVMEGFLNLRWSRFARVLLTRSIAITPTLLVAIFQDVHHLTGMNDFLNVL…
XP_022053121.1	MKAEQDGDLLEEDSPQENGVQTNQYSSISPPASPVVEDEPFSTYFEEKVPIPESVNQAFSFRKLWAFTGPGFLMSIAYLDPGNIESDLQSGAKAGFKLLWVLLGATIIGLLLQRLAARLGVVTGMHLAEVCNRQYPTVPRIILWLMVELAIIGSDMQEVIGCAIALNLLSVGRIPLWAGVLITITDTFVFLFLDKYGLRKLEAFFGFLITVMAISFGYEYVLVKPDQPQLLKGMFVPYCSGCGPVQLEQAVGIVGAVIMPHNIYLHSALVKSREVDRKNKKEVKEANKYFFIESTIALFVSFLINVFVVAVFAQAFYNKTNMQVNEECNATGSPHTDLFPLNNDTLEVDIYKGGVVLGCFFGPAALYIWAIGILAAGQSSTMTGTYSGQFVMEGFLNLR…
XP_022053122.1	MKGGKADRSRLKDSPQENGVQTNQYSSISPPASPVVEDEPFSTYFEEKVPIPESVNQAFSFRKLWAFTGPGFLMSIAYLDPGNIESDLQSGAKAGFKLLWVLLGATIIGLLLQRLAARLGVVTGMHLAEVCNRQYPTVPRIILWLMVELAIIGSDMQEVIGCAIALNLLSVGRIPLWAGVLITITDTFVFLFLDKYGLRKLEAFFGFLITVMAISFGYEYVLVKPDQPQLLKGMFVPYCSGCGPVQLEQAVGIVGAVIMPHNIYLHSALVKSREVDRKNKKEVKEANKYFFIESTIALFVSFLINVFVVAVFAQAFYNKTNMQVNEECNATGSPHTDLFPLNNDTLEVDIYKGGVVLGCFFGPAALYIWAIGILAAGQSSTMTGTYSGQFVMEGFLNLR…
XP_023142883.1	MKAEQDGDLLEEDSPQENGVQTNQYSSISPPASPVVEDEPFSTYFEEKVPIPESVNQAFSFRKLWAFTGPGFLMSIAYLDPGNIESDLQSGAKAGFKLLWVLLGATIIGLLLQRLAARLGVVTGMHLAEVCNRQYPTVPRILLWLMVELAIIGSDMQEVIGCAIALNLLSVGRIPLWAGVLITITDTFVFLFLDKYGLRKLEAFFGFLITVMAVSFGYEYVLVKPDQPQLLKGMFVPYCSGCGPVQLEQAVGIVGAVIMPHNIYLHSALVKSREVDRKNKKEVKEANKYFFIESTIALFVSFLINVFVVAVFAQAFYNKTNMQVNEECNATGSPHTDLFPLNNDTLEVDIYKGGVVLGCFFGPAALYIWAIGILAAGQSSTMTGTYSGQFVMEGFLNLR…
XP_023142884.1	MKGGKTDRSRLKDSPQENGVQTNQYSSISPPASPVVEDEPFSTYFEEKVPIPESVNQAFSFRKLWAFTGPGFLMSIAYLDPGNIESDLQSGAKAGFKLLWVLLGATIIGLLLQRLAARLGVVTGMHLAEVCNRQYPTVPRILLWLMVELAIIGSDMQEVIGCAIALNLLSVGRIPLWAGVLITITDTFVFLFLDKYGLRKLEAFFGFLITVMAVSFGYEYVLVKPDQPQLLKGMFVPYCSGCGPVQLEQAVGIVGAVIMPHNIYLHSALVKSREVDRKNKKEVKEANKYFFIESTIALFVSFLINVFVVAVFAQAFYNKTNMQVNEECNATGSPHTDLFPLNNDTLEVDIYKGGVVLGCFFGPAALYIWAIGILAAGQSSTMTGTYSGQFVMEGFLNLR…
XP_023142886.1	MKAEQDGDLLEEDSPQENGVQTNQYSSISPPASPVVEDEPFSTYFEEKVPIPESVNQAFSFRKLWAFTGPGFLMSIAYLDPGNIESDLQSGAKAGFKLLWVLLGATIIGLLLQRLAARLGVVTGMHLAEVCNRQYPTVPRILLWLMVELAIIGSDMQEVIGCAIALNLLSVGRIPLWAGVLITITDTFVFLFLDKYGLRKLEAFFGFLITVMAVSFGYEYVLVKPDQPQLLKGMFVPYCSGCGPVQLEQAVGIVGAVIMPHNIYLHSALVKSREVDRKNKKEVKEANKYFFIESTIALFVSFLINVFVVAVFAQAFYNKTNMQVNEECNATGSPHTDLFPLNNDTLEVDIYKGGVVLGCFFGPAALYIWAIGILAAGQSSTMTGTYSGQFVMEGFLNLR…
XP_023142885.1	MKGGKTDRSRLKDSPQENGVQTNQYSSISPPASPVVEDEPFSTYFEEKVPIPESVNQAFSFRKLWAFTGPGFLMSIAYLDPGNIESDLQSGAKAGFKLLWVLLGATIIGLLLQRLAARLGVVTGMHLAEVCNRQYPTVPRILLWLMVELAIIGSDMQEVIGCAIALNLLSVGRIPLWAGVLITITDTFVFLFLDKYGLRKLEAFFGFLITVMAVSFGYEYVLVKPDQPQLLKGMFVPYCSGCGPVQLEQAVGIVGAVIMPHNIYLHSALVKSREVDRKNKKEVKEANKYFFIESTIALFVSFLINVFVVAVFAQAFYNKTNMQVNEECNATGSPHTDLFPLNNDTLEVDIYKGGVVLGCFFGPAALYIWAIGILAAGQSSTMTGTYSGQFVMEGFLNLR…
XP_008282907.1	MKAEQEGDLLEEDSPQENGVQTNQYSAISPPASPVVEDEPFSTYFEEKVPIPESVNQVFSFRKLWAFTGPGFLMSIAYLDPGNIESDLQSGAKAGFKLLWVLLGATIIGLLLQRLAARLGVVTGMHLAEVCNRQYPTVPRVILWLMVELAIIGSDMQEVIGCAIALNLLSVGRIPLWAGVLITITDTFVFLFLDKYGLRKLEAFFGFLITVMAVSFGYEYVLVKPDQPELLKGMFVPYCAGCGPVQLEQAVGIVGAVIMPHNIYLHSALVKSRDVDRKNKKEVKEANKYFFIESTIALFISFLINVFVVAVFAQAFYNKTNMQVNEECNATGFPHTDLFPLNNETLEVDIFKGGVVLGCYFGPAALYIWAIGILAAGQSSTMTGTYSGQFVMEGFLNLR…
XP_008282908.1	MKAEQEGDLLEEDSPQENGVQTNQYSAISPPASPVVEDEPFSTYFEEKVPIPESVNQVFSFRKLWAFTGPGFLMSIAYLDPGNIESDLQSGAKAGFKLLWVLLGATIIGLLLQRLAARLGVVTGMHLAEVCNRQYPTVPRVILWLMVELAIIGSDMQEVIGCAIALNLLSVGRIPLWAGVLITITDTFVFLFLDKYGLRKLEAFFGFLITVMAVSFGYEYVLVKPDQPELLKGMFVPYCAGCGPVQLEQAVGIVGAVIMPHNIYLHSALVKSRDVDRKNKKEVKEANKYFFIESTIALFISFLINVFVVAVFAQAFYNKTNMQVNEECNATGFPHTDLFPLNNETLEVDIFKGGVVLGCYFGPAALYIWAIGILAAGQSSTMTGTYSGQFVMEGFLNLR…
XP_029946608.1	MKENKTEKSSLKDSPQENGIQTSQYSAISPPASPVAQDEPFSTYFEEKVPIPESVNQVFSFRKLWAFTGPGFLMSIAYLDPGNIESDLQSGAKAGFKLLWVLLGATIIGLLLQRLAARLGVVTGMHLAEVCNRQYPTVPRIILWLMVELAIIGSDMQEVIGCAIALNLLSVGRIPLWAGVLITITDTFVFLFLDKYGLRKLEAFFGFLITVMAISFGYEYVLVKPDQGELLKGMFVPYCEGCGPLQLEQAVGIVGAVIMPHNIYLHSALVKSRDVDRKNKKEVKEANKYFFIESAVALFVSFLINVFVVAVFAQAFYNKTNMEVNAECNATGIPHTDLFPLNNETLEVDIYKGGVVLGCFFGPAALYIWAIGILAAGQSSTMTGTYSGQFVMEGFLNLR…
XP_029946607.1	MKPQQDGDLLEEDSPQENGIQTSQYSAISPPASPVAQDEPFSTYFEEKVPIPESVNQVFSFRKLWAFTGPGFLMSIAYLDPGNIESDLQSGAKAGFKLLWVLLGATIIGLLLQRLAARLGVVTGMHLAEVCNRQYPTVPRIILWLMVELAIIGSDMQEVIGCAIALNLLSVGRIPLWAGVLITITDTFVFLFLDKYGLRKLEAFFGFLITVMAISFGYEYVLVKPDQGELLKGMFVPYCEGCGPLQLEQAVGIVGAVIMPHNIYLHSALVKSRDVDRKNKKEVKEANKYFFIESAVALFVSFLINVFVVAVFAQAFYNKTNMEVNAECNATGIPHTDLFPLNNETLEVDIYKGGVVLGCFFGPAALYIWAIGILAAGQSSTMTGTYSGQFVMEGFLNLR…
XP_029946606.1	MKENKTEKSSLKDSPQENGIQTSQYSAISPPASPVAQDEPFSTYFEEKVPIPESVNQVFSFRKLWAFTGPGFLMSIAYLDPGNIESDLQSGAKAGFKLLWVLLGATIIGLLLQRLAARLGVVTGMHLAEVCNRQYPTVPRIILWLMVELAIIGSDMQEVIGCAIALNLLSVGRIPLWAGVLITITDTFVFLFLDKYGLRKLEAFFGFLITVMAISFGYEYVLVKPDQGELLKGMFVPYCEGCGPLQLEQAVGIVGAVIMPHNIYLHSALVKSRDVDRKNKKEVKEANKYFFIESAVALFVSFLINVFVVAVFAQAFYNKTNMEVNAECNATGIPHTDLFPLNNETLEVDIYKGGVVLGCFFGPAALYIWAIGILAAGQSSTMTGTYSGQFVMEGFLNLR…
XP_029946604.1	MKPQQDGDLLEEDSPQENGIQTSQYSAISPPASPVAQDEPFSTYFEEKVPIPESVNQVFSFRKLWAFTGPGFLMSIAYLDPGNIESDLQSGAKAGFKLLWVLLGATIIGLLLQRLAARLGVVTGMHLAEVCNRQYPTVPRIILWLMVELAIIGSDMQEVIGCAIALNLLSVGRIPLWAGVLITITDTFVFLFLDKYGLRKLEAFFGFLITVMAISFGYEYVLVKPDQGELLKGMFVPYCEGCGPLQLEQAVGIVGAVIMPHNIYLHSALVKSRDVDRKNKKEVKEANKYFFIESAVALFVSFLINVFVVAVFAQAFYNKTNMEVNAECNATGIPHTDLFPLNNETLEVDIYKGGVVLGCFFGPAALYIWAIGILAAGQSSTMTGTYSGQFVMEGFLNLR…
XP_018554549.1	MKAEQEGDLIEGDSPQENGVQTNQYSSISPPASPVAQDEPFSTYFEEKVPIPESPNQVFSFRKLWAFTGPGFLMSIAYLDPGNIESDLQSGAKAGFKLLWVLLLATIIGLLLQRLAARLGVVTGMHLAEVCNRQYPTVPRIILWLMVELAIIGSDMQEVIGCAIALNLLSVGRIPLWAGVLITITDTFVFLFLDKYGLRKLEAFFGFLITVMAISFGYEYVLVKPDQGELLKGMFVPYCAGCGPVQLEQAVGIVGAVIMPHNIYLHSALVKSREVDRKNKKEVKEANKYFFIESSIALFVSFLINVFVVAVFAQAFYNKSNMEVNAECNATGSPHTDLFPLNNGTLEVDIYKGGVVLGCFFGPAALYIWAIGILAAGQSSTMTGTYSGQFVMEGFLNLR…
XP_018554548.1	MKGGKNEKAKLRDSPQENGVQTNQYSSISPPASPVAQDEPFSTYFEEKVPIPESPNQVFSFRKLWAFTGPGFLMSIAYLDPGNIESDLQSGAKAGFKLLWVLLLATIIGLLLQRLAARLGVVTGMHLAEVCNRQYPTVPRIILWLMVELAIIGSDMQEVIGCAIALNLLSVGRIPLWAGVLITITDTFVFLFLDKYGLRKLEAFFGFLITVMAISFGYEYVLVKPDQGELLKGMFVPYCAGCGPVQLEQAVGIVGAVIMPHNIYLHSALVKSREVDRKNKKEVKEANKYFFIESSIALFVSFLINVFVVAVFAQAFYNKSNMEVNAECNATGSPHTDLFPLNNGTLEVDIYKGGVVLGCFFGPAALYIWAIGILAAGQSSTMTGTYSGQFVMEGFLNLR…
XP_018554551.1	MKGGKNEKAKLRDSPQENGVQTNQYSSISPPASPVAQDEPFSTYFEEKVPIPESPNQVFSFRKLWAFTGPGFLMSIAYLDPGNIESDLQSGAKAGFKLLWVLLLATIIGLLLQRLAARLGVVTGMHLAEVCNRQYPTVPRIILWLMVELAIIGSDMQEVIGCAIALNLLSVGRIPLWAGVLITITDTFVFLFLDKYGLRKLEAFFGFLITVMAISFGYEYVLVKPDQGELLKGMFVPYCAGCGPVQLEQAVGIVGAVIMPHNIYLHSALVKSREVDRKNKKEVKEANKYFFIESSIALFVSFLINVFVVAVFAQAFYNKSNMEVNAECNATGSPHTDLFPLNNGTLEVDIYKGGVVLGCFFGPAALYIWAIGILAAGQSSTMTGTYSGQFVMEGFLNLR…
XP_022600580.1	MKGGKNEKSKLKDSPQENGVQTNQYSSISPPASPEIQEEPFSTYFEDKVPIPEGGNQIFSFRKLWAFTGPGFLMSIAYLDPGNIESDLQSGAKAGFKLLWVLLLATIIGLLLQRLAARLGVVTGMHLAEVCNRQYPAVPRIILWLMVELAIIGSDMQEVIGCAIALNLLSVGRIPLWGGVLITITDTFVFLFLDKYGLRKLEAFFGFLITVMAISFGYEYVLVKPDQGELLKGMFVPYCADCGPVQLEQAVGIVGAVIMPHNIYLHSALVKSREVDRRNKKEVKEANKYYFIESTIALFVSFLINVFVVAVFAQAFYNKTNMDVNAVCNATGSPHTDLFPLNNGTLEVDIYKGGVVLGCFFGPAALYIWAIGILAAGQSSTMTGTYSGQFVMEGFLNLR…
XP_023279274.1	MKGGKNEKSNLKDSPQENGVQTNQYSSISPPASPEIQEEPFSTYFEDKVPIPEGGNQIFSFRKLWAFTGPGFLMSIAYLDPGNIESDLQSGAKAGFKLLWVLLLATIIGLLLQRLAARLGVVTGMHLAEVCNRQYPAVPRIILWLMVELAIIGSDMQEVIGCAIALNLLSVGRIPLWGGVLITITDTFVFLFLDKYGLRKLEAFFGFLITVMAISFGYEYVLVKPDQGELLKGMFVPYCADCGPVQLEQAVGIVGAVIMPHNIYLHSALVKSREVDRRNKKEVKEANKYYFIESTIALFVSFLINVFVVAVFAQAFYNKTNMDVNAVCNATGSPHTDLFPLNNGTLEVDIYKGGVVLGCFFGPAALYIWAIGILAAGQSSTMTGTYSGQFVMEGFLNLR…
XP_022600579.1	MKAVQDGDLLEEDSPQENGVQTNQYSSISPPASPEIQEEPFSTYFEDKVPIPEGGNQIFSFRKLWAFTGPGFLMSIAYLDPGNIESDLQSGAKAGFKLLWVLLLATIIGLLLQRLAARLGVVTGMHLAEVCNRQYPAVPRIILWLMVELAIIGSDMQEVIGCAIALNLLSVGRIPLWGGVLITITDTFVFLFLDKYGLRKLEAFFGFLITVMAISFGYEYVLVKPDQGELLKGMFVPYCADCGPVQLEQAVGIVGAVIMPHNIYLHSALVKSREVDRRNKKEVKEANKYYFIESTIALFVSFLINVFVVAVFAQAFYNKTNMDVNAVCNATGSPHTDLFPLNNGTLEVDIYKGGVVLGCFFGPAALYIWAIGILAAGQSSTMTGTYSGQFVMEGFLNLR…
XP_022600581.1	MKGGKNEKSKLKDSPQENGVQTNQYSSISPPASPEIQEEPFSTYFEDKVPIPEGGNQIFSFRKLWAFTGPGFLMSIAYLDPGNIESDLQSGAKAGFKLLWVLLLATIIGLLLQRLAARLGVVTGMHLAEVCNRQYPAVPRIILWLMVELAIIGSDMQEVIGCAIALNLLSVGRIPLWGGVLITITDTFVFLFLDKYGLRKLEAFFGFLITVMAISFGYEYVLVKPDQGELLKGMFVPYCADCGPVQLEQAVGIVGAVIMPHNIYLHSALVKSREVDRRNKKEVKEANKYYFIESTIALFVSFLINVFVVAVFAQAFYNKTNMDVNAVCNATGSPHTDLFPLNNGTLEVDIYKGGVVLGCFFGPAALYIWAIGILAAGQSSTMTGTYSGQFVMEGFLNLR…
XP_026203337.1	MKREKNEKSKLKDSPQENGVHTNQYSSISPPASPVAEDNPFSTYFEEKVHIPETDSQAFSFRKLWAFTGPGFLMSIAYLDPGNIESDLQSGAKAGFKLLWVLLVSTIIGLLLQRLAARLGVVTGMHLAEICNRQYPTVPRIILWLMVELAIIGSDMQEVIGCAIALNLLSVGRIPLWAGVLITITDTFVFLFLDKYGLRKLEAFFGFLITVMALSFGYEYVLVKPDQGELLKGMFVPYCAGCGPVQLEQAVGVVGAVIMPHNIYLHSALVKSREVDRKNKKEIKEANKYFFIESSIALFISFLINVFVVAVFAQAFYNKSNMEVNAECNVTGIPHTDLFPLNNDTLEVDIYKGGVVLGCFFGPAALYIWAIGILAAGQSSTMTGTYSGQFVMEGFLNLR…
XP_026203336.1	MKAEHDGDLLEEDSPQENGVHTNQYSSISPPASPVAEDNPFSTYFEEKVHIPETDSQAFSFRKLWAFTGPGFLMSIAYLDPGNIESDLQSGAKAGFKLLWVLLVSTIIGLLLQRLAARLGVVTGMHLAEICNRQYPTVPRIILWLMVELAIIGSDMQEVIGCAIALNLLSVGRIPLWAGVLITITDTFVFLFLDKYGLRKLEAFFGFLITVMALSFGYEYVLVKPDQGELLKGMFVPYCAGCGPVQLEQAVGVVGAVIMPHNIYLHSALVKSREVDRKNKKEIKEANKYFFIESSIALFISFLINVFVVAVFAQAFYNKSNMEVNAECNVTGIPHTDLFPLNNDTLEVDIYKGGVVLGCFFGPAALYIWAIGILAAGQSSTMTGTYSGQFVMEGFLNLR…
ADK70949.1	MKGRKNEKSKLKDSPQENGVQTNQYSSISPPASPVAQDEPFSTYFEDKVAIPENGNQVFSFRKLWAFTGPGFLMSIAYLDPGNIESDLQSGAKAGFKLLWVLLGATIIGLLLQRLAARLGVVTGMHLAEVCNRQYPIIPRIILWLMVELAIIGSDMQEVIGCAIALNLLSVGRIPLWGGVLITITDTFVFLFLDKYGLRKLEAFFGFLITVMALSFGYEYVLVKPNQGELLKGMFIPYCSDCGPVQMEQAVGIVGAVIMPHNIYLHSALVKSRDVNRANKREVKEANKYFFIESCVALFVSFLINVFVVAVFAQAFYNKTNMEVNALCNATGSPHTDLFPLNNGTLEVDIYKGGVVLGCFFGPAALYIWAIGILAAGQSSTMTGTYSGQFVMEGFLNLR…
ABE97051.1	MKGDKNENSELKDSPPDNGVQTSQYNSISPPASPVADEEPFSTYFEDKVPIPESENQIFSFRKLWAFTGPGFLMSIAYLDPGNIESDLQSGAKAGFKLLWVLLLATIIGLLLQRLAARLGVVTGMHLAEVCNRQYPTVPRIILWLMVELAIIGSDMQEVIGCAIALNLLSVGRIPLWAGVLITITDTFVFLFLDKYGLRKLEAFFGFLITVMAISFGYEYVLVKPDQGELLKGMFLPYCAGCEPVQLEQAVGIVGAVIMPHNIYLHSALVKSREIDRRNKKEVKEANKYYFIESTIALFISFLINVFVVAVFAQAFYAKTNIQVNEQCNATGSPHTDLFPLNNDTLEVDIYKGGVVLGCVFGPAALYIWAVGILAAGQSSTMTGTYSGQFVMEGFLNLR…
AWP03031.1	MKGDKNENSELKDSPPDNGVQTSQYNSISPPASPVADEEPFSTYFEDKVPIPESENQIFSFRKLWAFTGPGFLMSIAYLDPGNIESDLQSGAKAGFKLLWVLLLATIIGLLLQRLAARLGVVTGMHLAEVCNRQYPTVPRIILWLMVELAIIGSDMQEVIGCAIALNLLSVGRIPLWAGVLITITDTFVFLFLDKYGLRKLEAFFGFLITVMAISFGYEYVLVKPDQGELLKGMFLPYCAGCGPVQLEQAVGIVGAVIMPHNIYLHSALVKSREIDRRNKKEVKEANKYYFIESTIALFISFLINVFVVAVFAQAFYAKTNIQVNEQCNATGSPHTDLFPLNNDTLEVDIYKGGVVLGCVFGPAALYIWAVGILAAGQSSTMTGTYSGQFVMEGFLNLR…
AWP03032.1	MKAEQEGDIVEEDSPPDNGVQTSQYNSISPPASPVADEEPFSTYFEDKVPIPESENQIFSFRKLWAFTGPGFLMSIAYLDPGNIESDLQSGAKAGFKLLWVLLLATIIGLLLQRLAARLGVVTGMHLAEVCNRQYPTVPRIILWLMVELAIIGSDMQEVIGCAIALNLLSVGRIPLWAGVLITITDTFVFLFLDKYGLRKLEAFFGFLITVMAISFGYEYVLVKPDQGELLKGMFLPYCAGCGPVQLEQAVGIVGAVIMPHNIYLHSALVKSREIDRRNKKEVKEANKYYFIESTIALFISFLINVFVVAVFAQAFYAKTNIQVNEQCNATGSPHTDLFPLNNDTLEVDIYKGGVVLGCVFGPAALYIWAVGILAAGQSSTMTGTYSGQFVMEGFLNLR…
ABB73023.1	MKGDKNENSELKDSPPDNGVQTSQYNSISPPASPVADEEPFSTYFEDKVPIPESENQIFSFRKLWAFTGPGFLMSIAYLDPGNIESDLQSGAKAGFKLLWVLLLATIIGLLLQRLAARLGVVTGMHLAEVCNRQYPTVPRIILWLMVELAIIGSDMQEVIGCAIALNLLSVGRIPLWAGVLITITDTFVFLFLDKYGLRKLEAFFGFLITVMAISFGYEYVLVKPDQGELLKGMFLPYCAGCEPVQLEQAVGIVGAVIMPHNIYLHSALVKSREIDRRNKKEVKEANKYYFIESTIALFISFLINVFVVAVFAQAFYAKTNIQVNEQCNATGSPHTDLFPLNNDTLEVDIYKGGVVLGCVFGPAALYIWAVGILAAGQSSTMTGTYSGQFVMEGFLNLR…
ACE80209.1	MKGDKNENSELKDSPPDNGVQTSQYNSISPPASPVADEEPFSTYFEDKVPIPESENQIFSFRKLWAFTGPGFLMSIAYLDPGNIESDLQSGAKAGFKLLWVLLLATIIGLLLQRLAARLGVVTGMHLAEVCNRQYPTVPRIILWLMVELAIIGSDMQEVIGCAIALNLLSVGRIPLWAGVLITITDTFVFLFLDKYGLRKLEAFFGFLITVMAISFGYEYVLVKPDQGELLKGMFLPYCAGCGPVQLEQAVGIVGAVIMPHNIYLHSALVKSREIDRRNKKEVKEANKYYFIESTIALFISFLINVFVVAVFAQAFYAKTNIQVNEQCNATGSPHTDLFPLNNDTLEVDIYKGGVVLGCVFGPAALYIWAVGILAAGQSSTMTGTYSGQFVMEGFLNLR…
AWP03034.1	MKGDKNENSELKDSPPDNGVQTSQYNSISPPASPVADEEPFSTYFEDKVPIPESENQIFSFRKLWAFTGPGFLMSIAYLDPGNIESDLQSGAKAGFKLLWVLLLATIIGLLLQRLAARLGVVTGMHLAEVCNRQYPTVPRIILWLMVELAIIGSDMQEVIGCAIALNLLSVGRIPLWAGVLITITDTFVFLFLDKYGLRKLEAFFGFLITVMAISFGYEYVLVKPDQGELLKGMFLPYCAGCGPVQLEQAVGIVGAVIMPHNIYLHSALVKSREIDRRNKKEVKEANKYYFIESTIALFISFLINVFVVAVFAQAFYAKTNIQVNEQCNATGSPHTDLFPLNNDTLEVDIYKGGVVLGCVFGPAALYIWAVGILAAGQSSTMTGTYSGQFVMEGFLNLR…
ABE97050.1	MKGDKNENSELKDSPPDNGVQTSQYNSISPPASPVADEEPFSTYFEDKVPIPESENQIFSFRKLWAFTGPGFLMSIAYLDPGNIESDLQSGAKAGFKLLWVLLLATIIGLLLQRLAARLGVVTGMHLAEVCNRQYPTVPRIILWLMVELAIIGSDMQEVIGCAIALNLLSVGRIPLWAGVLITITDTFVFLFLDKYGLRKLEAFFGFLITVMAISFGYEYVLVKPDQGELLKGMFLPYCAGCEPVQLEQAVGIVGAVIMPHNIYLHSALVKSREIDRRNKKEVKEANKYYFIESTIALFISFLINVFVVAVFAQAFYAKTNIQVNEQCNATGSPHTDLFPLNNDTLEVDIYKGGVVLGCVFGPAALYIWAVGILAAGQSSTMTGTYSGQFVMEGFLNLR…
XP_029989945.1	MKSEQEGDYLEEDASQENGIIQPTQYSSISPPASPVEQDEPFSTYFEEKVHIPENGNQVFSFRKLWAFTGPGFLMSIAYLDPGNIESDLQSGAKAGFKLLWVLLVATIIGLLLQRLAARLGVVTGMHLAEVCNRQYPTVPRIILWLMVELAIIGSDMQEVIGCAIALNLLSVGRIPLWAGVLITITDTFVFLFLDKYGLRKLEAFFGFLITVMAVSFGYEYVLVKPDQGELLKGMFVPYCADCGPVQLEQAVGIVGAVIMPHNIYLHSALVKSIYSLLLVPEVDRKNKKEVKEANKYFFIESSIALFVSFLINXFVVAVFAQAFYNKRNIDVNTECNATGSPHTDLFPLNNGTLEVDIYKGGVVLGCFFGPAALYIWAIGILAAGQSSTMTGTYSGQFV…
XP_029357690.1	MKEGENEKSGLKDSPQENGVQTNQYHTISPPLSPDIQEEPFSTYFEDKVQVPKAVNQTFSFRKLWAFTGPGFLMSIAYLDPGNIESDLQSGAKAGFKLLWVLLFSTIIGLLLQRLAARLGVVTGMHLAEVCNRQYPTVPRIILWLMVELAIIGSDMQEVIGCAIALNLLSVGRIPLWGGVLITITDTFVFLFLDKYGLRKLEAFFGFLITVMAISFGYEYVLVKPNQGELLKGMFVPYCADCGPVQLEQAVGIVGAVIMPHNIYLHSALVKSREVDRRNKREVKEANKYFFIESTIALFVSFLINVFVVAVFAQAFYNKTNLDVNLMCNTTGSPHQDLFPPDNSTLEVDIYKGGVVLGCFFGPAALYIWAIGILAAGQSSTMTGTYSGQFVMEGFLNLR…
XP_029357688.1	MKEGENEKSGLKDSPQENGVQTNQYHTISPPLSPDIQEEPFSTYFEDKVQVPKAVNQTFSFRKLWAFTGPGFLMSIAYLDPGNIESDLQSGAKAGFKLLWVLLFSTIIGLLLQRLAARLGVVTGMHLAEVCNRQYPTVPRIILWLMVELAIIGSDMQEVIGCAIALNLLSVGRIPLWGGVLITITDTFVFLFLDKYGLRKLEAFFGFLITVMAISFGYEYVLVKPNQGELLKGMFVPYCADCGPVQLEQAVGIVGAVIMPHNIYLHSALVKSREVDRRNKREVKEANKYFFIESTIALFVSFLINVFVVAVFAQAFYNKTNLDVNLMCNTTGSPHQDLFPPDNSTLEVDIYKGGVVLGCFFGPAALYIWAIGILAAGQSSTMTGTYSGQFVMEGFLNLR…
XP_029357687.1	MKAVEDEDILEEDSPQENGVQTNQYHTISPPLSPDIQEEPFSTYFEDKVQVPKAVNQTFSFRKLWAFTGPGFLMSIAYLDPGNIESDLQSGAKAGFKLLWVLLFSTIIGLLLQRLAARLGVVTGMHLAEVCNRQYPTVPRIILWLMVELAIIGSDMQEVIGCAIALNLLSVGRIPLWGGVLITITDTFVFLFLDKYGLRKLEAFFGFLITVMAISFGYEYVLVKPNQGELLKGMFVPYCADCGPVQLEQAVGIVGAVIMPHNIYLHSALVKSREVDRRNKREVKEANKYFFIESTIALFVSFLINVFVVAVFAQAFYNKTNLDVNLMCNTTGSPHQDLFPPDNSTLEVDIYKGGVVLGCFFGPAALYIWAIGILAAGQSSTMTGTYSGQFVMEGFLNLR…
XP_029357691.1	MKEGENEKSGLKDSPQENGVQTNQYHTISPPLSPDIQEEPFSTYFEDKVQVPKAVNQTFSFRKLWAFTGPGFLMSIAYLDPGNIESDLQSGAKAGFKLLWVLLFSTIIGLLLQRLAARLGVVTGMHLAEVCNRQYPTVPRIILWLMVELAIIGSDMQEVIGCAIALNLLSVGRIPLWGGVLITITDTFVFLFLDKYGLRKLEAFFGFLITVMAISFGYEYVLVKPNQGELLKGMFVPYCADCGPVQLEQAVGIVGAVIMPHNIYLHSALVKSREVDRRNKREVKEANKYFFIESTIALFVSFLINVFVVAVFAQAFYNKTNLDVNLMCNTTGSPHQDLFPPDNSTLEVDIYKGGVVLGCFFGPAALYIWAIGILAAGQSSTMTGTYSGQFVMEGFLNLR…
NP_001306745.1	MKTEQDEDIVAEDSPQENGVQTSQYSAIPPVDQEEQFSTYFEDKVPIPENVNQLFSFRKLWAFTGPGFLMSIAYLDPGNIESDLQSGAKAGFKLLWVLLLATIIGLLLQRLAARLGVVTGMHLAEVCNRQYPTVPRIILWLMVELAIIGSDMQEVIGCAIALNLLSVGRIPLWGGVLITITDTFVFLFLDKYGLRKLEAFFGFLITVMALSFGYEYVLVKPDQGELLKGMFVPYCAGCGPVQLEQAVGIVGAVIMPHNIYLHSALVKSRDIDRKNKKEVKEANKYYFIESTIALFISFLINVFVVAVFAQAFYNKTNMEVNAECNATGSPHTDLFPLNNGTLEVDIYKGGVVLGCFFGPAALYIWAIGILAAGQSSTMTGTYSGQFVMEGFLNLQWSRF…
XP_004545083.2	MEGARHEKSKLKDSPQENGVHTNQYSSISPPASPVAQDEPFSTYFEERVPIPDSENQLFSFRKLWAFTGPGFLMSIAYLDPGNIESDLQSGAAAGFKLLWVLLVSTIIGLLLQRLAARLGVVTGMHLAEVCNRQYSTVPRIILWLMVELAIIGSDMQEVIGCAIALNLLSVGRIPLWGGVLITITDTFVFLFLDKYGLRKLEAFFGFLITIMALSFGYEYVLVKPDQGELLKGMFVPYCAGCGPVQLEQAVGIVGAVIMPHNIYLHSALVKSREVDRKNKKEVKEANKYFFIESAIALFVSFLINVFVVAVFAQAFYSKSNMDVNAMCNKTGSPHTDLFPLNNNTLEVDIYKGGIVLGCFFGPAALYIWAIGILAAGQSSTMTGTYSGQFVMEGFLNLR…
XP_005739557.1	MEGARHEKSKLKDSPQENGVHTNQYSSISPPASPVAQDEPFSTYFEERVPIPDSENQLFSFRKLWAFTGPGFLMSIAYLDPGNIESDLQSGAAAGFKLLWVLLVSTIIGLLLQRLAARLGVVTGMHLAEVCNRQYSTVPRIILWLMVELAIIGSDMQEVIGCAIALNLLSVGRIPLWGGVLITITDTFVFLFLDKYGLRKLEAFFGFLITIMALSFGYEYVLVKPDQGELLKGMFVPYCAGCGPVQLEQAVGIVGAVIMPHNIYLHSALVKSREVDRKNKKEVKEANKYFFIESAIALFVSFLINVFVVAVFAQAFYSKSNMDVNAMCNKTGSPHTDLFPLNNNTLEVDIYKGGIVLGCFFGPAALYIWAIGILAAGQSSTMTGTYSGQFVMEGFLNLR…
XP_005924824.1	MEGARHEKSKLKDSPQENGVHTNQYSSISPPASPVAQDEPFSTYFEERVPIPDSENQLFSFRKLWAFTGPGFLMSIAYLDPGNIESDLQSGAAAGFKLLWVLLVSTIIGLLLQRLAARLGVVTGMHLAEVCNRQYSTVPRIILWLMVELAIIGSDMQEVIGCAIALNLLSVGRIPLWGGVLITITDTFVFLFLDKYGLRKLEAFFGFLITIMALSFGYEYVLVKPDQGELLKGMFVPYCAGCGPVQLEQAVGIVGAVIMPHNIYLHSALVKSREVDRKNKKEVKEANKYFFIESAIALFVSFLINVFVVAVFAQAFYSKSNMDVNAMCNKTGSPHTDLFPLNNNTLEVDIYKGGIVLGCFFGPAALYIWAIGILAAGQSSTMTGTYSGQFVMEGFLNLR…
XP_006784412.1	MEGARHEKSKLKDSPQENGVHTNQYSSISPPASPVAQDEPFSTYFEERVQIPDSENQLFSFRKLWAFTGPGFLMSIAYLDPGNIESDLQSGAAAGFKLLWVLLVSTIIGLLLQRLAARLGVVTGMHLAEVCNRQYSTVPRIILWLMVELAIIGSDMQEVIGCAIALNLLSVGRIPLWGGVLITITDTFVFLFLDKYGLRKLEAFFGFLITIMALSFGYEYVLVKPDQGELLKGMFVPYCAGCGPVQLEQAVGIVGAVIMPHNIYLHSALVKSREVDRKNKKEVKEANKYFFIESAIALFVSFLINVFVVAVFAQAFYNKSNMDVNAVCNKTGSPHTDLFPLNNNTLEVDIYKGGIVLGCFFGPAALYIWAIGILAAGQSSTMTGTYSGQFVMEGFLNLR…
XP_004545080.2	MKPKQDGDLLEEDSPQENGVHTNQYSSISPPASPVAQDEPFSTYFEERVPIPDSENQLFSFRKLWAFTGPGFLMSIAYLDPGNIESDLQSGAAAGFKLLWVLLVSTIIGLLLQRLAARLGVVTGMHLAEVCNRQYSTVPRIILWLMVELAIIGSDMQEVIGCAIALNLLSVGRIPLWGGVLITITDTFVFLFLDKYGLRKLEAFFGFLITIMALSFGYEYVLVKPDQGELLKGMFVPYCAGCGPVQLEQAVGIVGAVIMPHNIYLHSALVKSREVDRKNKKEVKEANKYFFIESAIALFVSFLINVFVVAVFAQAFYSKSNMDVNAMCNKTGSPHTDLFPLNNNTLEVDIYKGGIVLGCFFGPAALYIWAIGILAAGQSSTMTGTYSGQFVMEGFLNLR…
XP_005739558.1	MKPKQDGDLLEEDSPQENGVHTNQYSSISPPASPVAQDEPFSTYFEERVPIPDSENQLFSFRKLWAFTGPGFLMSIAYLDPGNIESDLQSGAAAGFKLLWVLLVSTIIGLLLQRLAARLGVVTGMHLAEVCNRQYSTVPRIILWLMVELAIIGSDMQEVIGCAIALNLLSVGRIPLWGGVLITITDTFVFLFLDKYGLRKLEAFFGFLITIMALSFGYEYVLVKPDQGELLKGMFVPYCAGCGPVQLEQAVGIVGAVIMPHNIYLHSALVKSREVDRKNKKEVKEANKYFFIESAIALFVSFLINVFVVAVFAQAFYSKSNMDVNAMCNKTGSPHTDLFPLNNNTLEVDIYKGGIVLGCFFGPAALYIWAIGILAAGQSSTMTGTYSGQFVMEGFLNLR…
XP_005924822.1	MKPKQDGDLLEEDSPQENGVHTNQYSSISPPASPVAQDEPFSTYFEERVPIPDSENQLFSFRKLWAFTGPGFLMSIAYLDPGNIESDLQSGAAAGFKLLWVLLVSTIIGLLLQRLAARLGVVTGMHLAEVCNRQYSTVPRIILWLMVELAIIGSDMQEVIGCAIALNLLSVGRIPLWGGVLITITDTFVFLFLDKYGLRKLEAFFGFLITIMALSFGYEYVLVKPDQGELLKGMFVPYCAGCGPVQLEQAVGIVGAVIMPHNIYLHSALVKSREVDRKNKKEVKEANKYFFIESAIALFVSFLINVFVVAVFAQAFYSKSNMDVNAMCNKTGSPHTDLFPLNNNTLEVDIYKGGIVLGCFFGPAALYIWAIGILAAGQSSTMTGTYSGQFVMEGFLNLR…
XP_006784411.1	MKPKQDGDLLEEDSPQENGVHTNQYSSISPPASPVAQDEPFSTYFEERVQIPDSENQLFSFRKLWAFTGPGFLMSIAYLDPGNIESDLQSGAAAGFKLLWVLLVSTIIGLLLQRLAARLGVVTGMHLAEVCNRQYSTVPRIILWLMVELAIIGSDMQEVIGCAIALNLLSVGRIPLWGGVLITITDTFVFLFLDKYGLRKLEAFFGFLITIMALSFGYEYVLVKPDQGELLKGMFVPYCAGCGPVQLEQAVGIVGAVIMPHNIYLHSALVKSREVDRKNKKEVKEANKYFFIESAIALFVSFLINVFVVAVFAQAFYNKSNMDVNAVCNKTGSPHTDLFPLNNNTLEVDIYKGGIVLGCFFGPAALYIWAIGILAAGQSSTMTGTYSGQFVMEGFLNLR…
XP_005469464.1	MKPEQDGDLLEEDSPQENGVHTNQYSSISPPASPVAQDEPFSTYFEERVPIPDSENQLFSFRKLWAFTGPGFLMSIAYLDPGNIESDLQSGAAAGFKLLWVLLVSTIIGLLLQRLAARLGVVTGMHLAEVCNRQYSTVPRIILWLMVELAIIGSDMQEVIGCAIALNLLSVGRIPLWGGVLITITDTFVFLFLDKYGLRKLEAFFGFLITVMAVSFGYEYVLVKPDQGELLKGMFVPYCAGCGPVQLEQAVGIVGAVIMPHNIYLHSALVKSREVDRKNKKEVKEANKYFFIESTIALFVSFLINVFVVAVFAQAFYNKSNIEVNAECNATGSPHTDLFPLNNNTLEVDIYKGGIVLGCFFGPAALYIWAIGILAAGQSSTMTGTYSGQFVMEGFLNLR…
XP_003441553.1	MEGTRHEKSKLKDSPQENGVHTNQYSSISPPASPVAQDEPFSTYFEERVPIPDSENQLFSFRKLWAFTGPGFLMSIAYLDPGNIESDLQSGAAAGFKLLWVLLVSTIIGLLLQRLAARLGVVTGMHLAEVCNRQYSTVPRIILWLMVELAIIGSDMQEVIGCAIALNLLSVGRIPLWGGVLITITDTFVFLFLDKYGLRKLEAFFGFLITVMAVSFGYEYVLVKPDQGELLKGMFVPYCAGCGPVQLEQAVGIVGAVIMPHNIYLHSALVKSREVDRKNKKEVKEANKYFFIESTIALFVSFLINVFVVAVFAQAFYNKSNIEVNAECNATGSPHTDLFPLNNNTLEVDIYKGGIVLGCFFGPAALYIWAIGILAAGQSSTMTGTYSGQFVMEGFLNLR…
XP_004545084.2	MKPKQDGDLLEEDSPQENGVHTNQYSSISPPASPVAQDEPFSTYFEERVPIPDSENQLFSFRKLWAFTGPGFLMSIAYLDPGNIESDLQSGAAAGFKLLWVLLVSTIIGLLLQRLAARLGVVTGMHLAEVCNRQYSTVPRIILWLMVELAIIGSDMQEVIGCAIALNLLSVGRIPLWGGVLITITDTFVFLFLDKYGLRKLEAFFGFLITIMALSFGYEYVLVKPDQGELLKGMFVPYCAGCGPVQLEQAVGIVGAVIMPHNIYLHSALVKSREVDRKNKKEVKEANKYFFIESAIALFVSFLINVFVVAVFAQAFYSKSNMDVNAMCNKTGSPHTDLFPLNNNTLEVDIYKGGIVLGCFFGPAALYIWAIGILAAGQSSTMTGTYSGQFVMEGFLNLR…
XP_013767975.1	MKPKQDGDLLEEDSPQENGVHTNQYSSISPPASPVAQDEPFSTYFEERVPIPDSENQLFSFRKLWAFTGPGFLMSIAYLDPGNIESDLQSGAAAGFKLLWVLLVSTIIGLLLQRLAARLGVVTGMHLAEVCNRQYSTVPRIILWLMVELAIIGSDMQEVIGCAIALNLLSVGRIPLWGGVLITITDTFVFLFLDKYGLRKLEAFFGFLITIMALSFGYEYVLVKPDQGELLKGMFVPYCAGCGPVQLEQAVGIVGAVIMPHNIYLHSALVKSREVDRKNKKEVKEANKYFFIESAIALFVSFLINVFVVAVFAQAFYSKSNMDVNAMCNKTGSPHTDLFPLNNNTLEVDIYKGGIVLGCFFGPAALYIWAIGILAAGQSSTMTGTYSGQFVMEGFLNLR…
XP_014189852.1	MKPKQDGDLLEEDSPQENGVHTNQYSSISPPASPVAQDEPFSTYFEERVPIPDSENQLFSFRKLWAFTGPGFLMSIAYLDPGNIESDLQSGAAAGFKLLWVLLVSTIIGLLLQRLAARLGVVTGMHLAEVCNRQYSTVPRIILWLMVELAIIGSDMQEVIGCAIALNLLSVGRIPLWGGVLITITDTFVFLFLDKYGLRKLEAFFGFLITIMALSFGYEYVLVKPDQGELLKGMFVPYCAGCGPVQLEQAVGIVGAVIMPHNIYLHSALVKSREVDRKNKKEVKEANKYFFIESAIALFVSFLINVFVVAVFAQAFYSKSNMDVNAMCNKTGSPHTDLFPLNNNTLEVDIYKGGIVLGCFFGPAALYIWAIGILAAGQSSTMTGTYSGQFVMEGFLNLR…
XP_006784413.1	MKPKQDGDLLEEDSPQENGVHTNQYSSISPPASPVAQDEPFSTYFEERVQIPDSENQLFSFRKLWAFTGPGFLMSIAYLDPGNIESDLQSGAAAGFKLLWVLLVSTIIGLLLQRLAARLGVVTGMHLAEVCNRQYSTVPRIILWLMVELAIIGSDMQEVIGCAIALNLLSVGRIPLWGGVLITITDTFVFLFLDKYGLRKLEAFFGFLITIMALSFGYEYVLVKPDQGELLKGMFVPYCAGCGPVQLEQAVGIVGAVIMPHNIYLHSALVKSREVDRKNKKEVKEANKYFFIESAIALFVSFLINVFVVAVFAQAFYNKSNMDVNAVCNKTGSPHTDLFPLNNNTLEVDIYKGGIVLGCFFGPAALYIWAIGILAAGQSSTMTGTYSGQFVMEGFLNLR…
XP_014189853.1	MEGARHEKSKLKDSPQENGVHTNQYSSISPPASPVAQDEPFSTYFEERVPIPDSENQLFSFRKLWAFTGPGFLMSIAYLDPGNIESDLQSGAAAGFKLLWVLLVSTIIGLLLQRLAARLGVVTGMHLAEVCNRQYSTVPRIILWLMVELAIIGSDMQEVIGCAIALNLLSVGRIPLWGGVLITITDTFVFLFLDKYGLRKLEAFFGFLITIMALSFGYEYVLVKPDQGELLKGMFVPYCAGCGPVQLEQAVGIVGAVIMPHNIYLHSALVKSREVDRKNKKEVKEANKYFFIESAIALFVSFLINVFVVAVFAQAFYSKSNMDVNAMCNKTGSPHTDLFPLNNNTLEVDIYKGGIVLGCFFGPAALYIWAIGILAAGQSSTMTGTYSGQFVMEGFLNLR…
XP_005739560.1	MEGARHEKSKLKDSPQENGVHTNQYSSISPPASPVAQDEPFSTYFEERVPIPDSENQLFSFRKLWAFTGPGFLMSIAYLDPGNIESDLQSGAAAGFKLLWVLLVSTIIGLLLQRLAARLGVVTGMHLAEVCNRQYSTVPRIILWLMVELAIIGSDMQEVIGCAIALNLLSVGRIPLWGGVLITITDTFVFLFLDKYGLRKLEAFFGFLITIMALSFGYEYVLVKPDQGELLKGMFVPYCAGCGPVQLEQAVGIVGAVIMPHNIYLHSALVKSREVDRKNKKEVKEANKYFFIESAIALFVSFLINVFVVAVFAQAFYSKSNMDVNAMCNKTGSPHTDLFPLNNNTLEVDIYKGGIVLGCFFGPAALYIWAIGILAAGQSSTMTGTYSGQFVMEGFLNLR…
XP_006784414.1	MEGARHEKSKLKDSPQENGVHTNQYSSISPPASPVAQDEPFSTYFEERVQIPDSENQLFSFRKLWAFTGPGFLMSIAYLDPGNIESDLQSGAAAGFKLLWVLLVSTIIGLLLQRLAARLGVVTGMHLAEVCNRQYSTVPRIILWLMVELAIIGSDMQEVIGCAIALNLLSVGRIPLWGGVLITITDTFVFLFLDKYGLRKLEAFFGFLITIMALSFGYEYVLVKPDQGELLKGMFVPYCAGCGPVQLEQAVGIVGAVIMPHNIYLHSALVKSREVDRKNKKEVKEANKYFFIESAIALFVSFLINVFVVAVFAQAFYNKSNMDVNAVCNKTGSPHTDLFPLNNNTLEVDIYKGGIVLGCFFGPAALYIWAIGILAAGQSSTMTGTYSGQFVMEGFLNLR…
XP_025763136.1	MKPEQDGDLLEEDSPQENGVHTNQYSSISPPASPVAQDEPFSTYFEERVPIPDSENQLFSFRKLWAFTGPGFLMSIAYLDPGNIESDLQSGAAAGFKLLWVLLVSTIIGLLLQRLAARLGVVTGMHLAEVCNRQYSTVPRIILWLMVELAIIGSDMQEVIGCAIALNLLSVGRIPLWGGVLITITDTFVFLFLDKYGLRKLEAFFGFLITVMAVSFGYEYVLVKPDQGELLKGMFVPYCAGCGPVQLEQAVGIVGAVIMPHNIYLHSALVKSREVDRKNKKEVKEANKYFFIESTIALFVSFLINVFVVAVFAQAFYNKSNIEVNAECNATGSPHTDLFPLNNNTLEVDIYKGGIVLGCFFGPAALYIWAIGILAAGQSSTMTGTYSGQFVMEGFLNLR…
XP_030584622.1	MKGARNEKSKLKDSPQENGVHTNQYSAISPPASPVAQDEPFSTYFEERVPIPESENQLFSFRKLWAFTGPGFLMSIAYLDPGNIESDLQSGAKAGFKLLWVLLVSTIIGLLLQRLAARLGVVTGMHLAEVCNRQYSTVPRIILWLMVELAIIGSDMQEVIGCAIALNLLSVGRIPLWGGVLITITDTFVFLFLDKYGLRKLEAFFGFLITVMAVSFGYEYVLVKPDQGELLKGMFVPYCAGCGPVQLEQAVGIVGAVIMPHNIYLHSALVKSREIDRKNNKEVKEANKYFFIESAIALFVSFLINVFVVAVFAQAFYNKSNMEVNAECNATGSPHTDLFPLNNGTLEVDIYKGGIVLGCFFGPAALYIWAVGILAAGQSSTMTGTYSGQFVMEGFLNLQ…
XP_030584621.1	MKPQQEGDLLEEDSPQENGVHTNQYSAISPPASPVAQDEPFSTYFEERVPIPESENQLFSFRKLWAFTGPGFLMSIAYLDPGNIESDLQSGAKAGFKLLWVLLVSTIIGLLLQRLAARLGVVTGMHLAEVCNRQYSTVPRIILWLMVELAIIGSDMQEVIGCAIALNLLSVGRIPLWGGVLITITDTFVFLFLDKYGLRKLEAFFGFLITVMAVSFGYEYVLVKPDQGELLKGMFVPYCAGCGPVQLEQAVGIVGAVIMPHNIYLHSALVKSREIDRKNNKEVKEANKYFFIESAIALFVSFLINVFVVAVFAQAFYNKSNMEVNAECNATGSPHTDLFPLNNGTLEVDIYKGGIVLGCFFGPAALYIWAVGILAAGQSSTMTGTYSGQFVMEGFLNLQ…
XP_028302506.1	MTADANEKSSLKDSPQENGVQTNQYSAISPPASPVDQEQDGGFSTYFEEKVPIPNDANQAFSFRKLWAFTGPGFLMSIAYLDPGNIESDLQSGAKAGFKLLWVLLGATIIGLLLQRLAARLGVVTGMHLAEVCNRQYPTVPRIILWLMVELAIIGSDMQEVIGCAIALNLLSVGRIPLWAGVLITITDTFVFLFLDKYGLRKLEAFFGFLITVMAISFGYEYVLVKPDQGELLKGMFVPYCAGCGPVQLVQAVGIVGAVIMPHNIYLHSALVKSRDVDRKNKNDVKEANKYFFIESTIALFISFLINVFVVAVFAQAFYNKTNMDVNAECNMTGSPHTDLFPLNNATLEVDIYKGGVVLGCFFGPAALYIWAIGILAAGQSSTMTGTYSGQFVMEGFLN…
XP_028302503.1	MNAQQDVDLLEEDSPQENGVQTNQYSAISPPASPVDQEQDGGFSTYFEEKVPIPNDANQAFSFRKLWAFTGPGFLMSIAYLDPGNIESDLQSGAKAGFKLLWVLLGATIIGLLLQRLAARLGVVTGMHLAEVCNRQYPTVPRIILWLMVELAIIGSDMQEVIGCAIALNLLSVGRIPLWAGVLITITDTFVFLFLDKYGLRKLEAFFGFLITVMAISFGYEYVLVKPDQGELLKGMFVPYCAGCGPVQLVQAVGIVGAVIMPHNIYLHSALVKSRDVDRKNKNDVKEANKYFFIESTIALFISFLINVFVVAVFAQAFYNKTNMDVNAECNMTGSPHTDLFPLNNATLEVDIYKGGVVLGCFFGPAALYIWAIGILAAGQSSTMTGTYSGQFVMEGFLN…
XP_019942457.1	MRAEQDGDILEEDSPQDNGIETNRYSSISPPASPVVQEEPFTTYFEDKVPIPESTNQVFSFRKLWAFTGPGFLMSIAYLDPGNIESDLQSGAKAGFKLLWVLLLATIIGLLLQRLAARLGVVTGMHLAEVCNRQYPTVPRIILWLMVELAIIGSDMQEVIGCAIALNLLSVGRIPLWGGVLITITDTFVFLFLDKYGLRKLEAFFGFLITVMAISFGYEYILVKPDQGKLLTGMFVPYCAGCGPVQLEQAVGIVGAVIMPHNIYLHSALVKSREIDRKNKKDVKEANKYFFIESTVALFISFLINVFVVAVFAEAFYDKTNIQVHEECNATGSPHTDLFPMNNNTLEVDIYKGGVVLGCVFGPAALYIWAIGILAAGQSSTMTGTYSGQFVMEGFLNLR…
AAX86980.1	MRAEQDGDILEEDSPQDNGIETNRYSSISPPASPVVQEEPFTTYFEDKVPIPESTNQVFSFRKLWAFTGPGFLMSIAYLDPGNIESDLQSGAKAGFKLLWVLLLATIIGLLLQRLAARLGVVTGMHLAEVCNRQYPTVPRIILWLMVELAIIGSDMQEVIGCAIALNLLSVGRIPLWGGVLITITDTFVFLFLDKYGLRKLEAFFGFLITVMAISFGYEYILVKPDQGKLLTGMFVPYCAGCGPVQLEQAVGIVGAVIMPHNIYLHSALVKSREIDRKNKKDVKEANKYFFIESTVALFISFLINVFVVAVFAEAFYDKTNIQVHEECNATGSPHTDLFPMNNNTLEVDIYKGGVVLGCVFGPAALYIWAIGILAAGQSSTMTGTYSGQFVMEGFLNLR…
XP_019942458.1	MTGETEERSKLKDSPQDNGIETNRYSSISPPASPVVQEEPFTTYFEDKVPIPESTNQVFSFRKLWAFTGPGFLMSIAYLDPGNIESDLQSGAKAGFKLLWVLLLATIIGLLLQRLAARLGVVTGMHLAEVCNRQYPTVPRIILWLMVELAIIGSDMQEVIGCAIALNLLSVGRIPLWGGVLITITDTFVFLFLDKYGLRKLEAFFGFLITVMAISFGYEYILVKPDQGKLLTGMFVPYCAGCGPVQLEQAVGIVGAVIMPHNIYLHSALVKSREIDRKNKKDVKEANKYFFIESTVALFISFLINVFVVAVFAEAFYDKTNIQVHEECNATGSPHTDLFPMNNNTLEVDIYKGGVVLGCVFGPAALYIWAIGILAAGQSSTMTGTYSGQFVMEGFLNLR…
XP_031178480.1	MKAEQDGDLLEEDSPQEDGVQTNQYSSISPPASPVAQDEPFSTYFEDKVAIPENVSQVFSFRKLWAFTGPGFLMSIAYLDPGNIESDLQSGATAGFKLLWVLLGATIIGLLLQRLAARLGVVTGMHLAEVCNRQYPTVPRIILWLMVELAIIGSDMQEVIGCAIAFNLLSVGRIPLWVGVLITITDTFVFLFLDKYGLRKLEAFFGFLITVMALSFGYEYVLVSPDQGELLKGMFLPYCAGCGPPQLEQAVGIVGAVIMPHNIYLHSALVKSRDIDRKNKKELKEANKYYFIESTVALFVSFLINVFVVAVFAQAFYGKTNIEMNKECNATGSPHSGLFPLNNGTLEVDIYKGGVVLGCVFGPAALYIWAIGILAAGQSSTMTGTYSGQFVMEGFLNLR…
XP_031178485.1	MKAEQDGDLLEDSPQEDGVQTNQYSSISPPASPVAQDEPFSTYFEDKVAIPENVSQVFSFRKLWAFTGPGFLMSIAYLDPGNIESDLQSGATAGFKLLWVLLGATIIGLLLQRLAARLGVVTGMHLAEVCNRQYPTVPRIILWLMVELAIIGSDMQEVIGCAIAFNLLSVGRIPLWVGVLITITDTFVFLFLDKYGLRKLEAFFGFLITVMALSFGYEYVLVSPDQGELLKGMFLPYCAGCGPPQLEQAVGIVGAVIMPHNIYLHSALVKSRDIDRKNKKELKEANKYYFIESTVALFVSFLINVFVVAVFAQAFYGKTNIEMNKECNATGSPHSGLFPLNNGTLEVDIYKGGVVLGCVFGPAALYIWAIGILAAGQSSTMTGTYSGQFVMEGFLNLRW…
XP_031178495.1	MKGGKNEKSKLNSPQEDGVQTNQYSSISPPASPVAQDEPFSTYFEDKVAIPENVSQVFSFRKLWAFTGPGFLMSIAYLDPGNIESDLQSGATAGFKLLWVLLGATIIGLLLQRLAARLGVVTGMHLAEVCNRQYPTVPRIILWLMVELAIIGSDMQEVIGCAIAFNLLSVGRIPLWVGVLITITDTFVFLFLDKYGLRKLEAFFGFLITVMALSFGYEYVLVSPDQGELLKGMFLPYCAGCGPPQLEQAVGIVGAVIMPHNIYLHSALVKSRDIDRKNKKELKEANKYYFIESTVALFVSFLINVFVVAVFAQAFYGKTNIEMNKECNATGSPHSGLFPLNNGTLEVDIYKGGVVLGCVFGPAALYIWAIGILAAGQSSTMTGTYSGQFVMEGFLNLRW…
XP_031178481.1	MKGGKNEKSKLKDSPQEDGVQTNQYSSISPPASPVAQDEPFSTYFEDKVAIPENVSQVFSFRKLWAFTGPGFLMSIAYLDPGNIESDLQSGATAGFKLLWVLLGATIIGLLLQRLAARLGVVTGMHLAEVCNRQYPTVPRIILWLMVELAIIGSDMQEVIGCAIAFNLLSVGRIPLWVGVLITITDTFVFLFLDKYGLRKLEAFFGFLITVMALSFGYEYVLVSPDQGELLKGMFLPYCAGCGPPQLEQAVGIVGAVIMPHNIYLHSALVKSRDIDRKNKKELKEANKYYFIESTVALFVSFLINVFVVAVFAQAFYGKTNIEMNKECNATGSPHSGLFPLNNGTLEVDIYKGGVVLGCVFGPAALYIWAIGILAAGQSSTMTGTYSGQFVMEGFLNLR…
XP_028430944.1	MKAEQDGDLLEEDSPQEDGVQTNQFSSISPPVSPVAQDEPFSTYFEDKVAIPENVSQVFSFRKLWAFTGPGFLMSIAYLDPGNIESDLQSGAKAGFKLLWVLLGATVIGLLLQRLAARLGVVTGMHLAEVCNRQYPTVPRIILWLMVELAIIGSDMQEVIGCAIAFNLLSVGRIPLWAGVLITITDTFVFLFLDKYGLRKLEAFFGFLITVMALSFGYEYVLVSPDQGELLKGMFLPYCAGCGPPQLEQAVGIVGAVIMPHNIYLHSALVKSRDIDRKNKKEVKEANKYYFIESTVALFVSFLINVFVVAVFAQAFYGKTNIEMNKECNATGSPHSGLFPLNNGTLEVDIYKGGVVLGCVFGPAALYIWAIGILAAGQSSTMTGTYSGQFVMEGFLNLR…
XP_028430947.1	MKGGKDEKSKLKDSPQEDGVQTNQFSSISPPVSPVAQDEPFSTYFEDKVAIPENVSQVFSFRKLWAFTGPGFLMSIAYLDPGNIESDLQSGAKAGFKLLWVLLGATVIGLLLQRLAARLGVVTGMHLAEVCNRQYPTVPRIILWLMVELAIIGSDMQEVIGCAIAFNLLSVGRIPLWAGVLITITDTFVFLFLDKYGLRKLEAFFGFLITVMALSFGYEYVLVSPDQGELLKGMFLPYCAGCGPPQLEQAVGIVGAVIMPHNIYLHSALVKSRDIDRKNKKEVKEANKYYFIESTVALFVSFLINVFVVAVFAQAFYGKTNIEMNKECNATGSPHSGLFPLNNGTLEVDIYKGGVVLGCVFGPAALYIWAIGILAAGQSSTMTGTYSGQFVMEGFLNLR…
TDH14295.1	MKAEQDGDLLEDSPQEDGVQTNQFSSISPPVSPVAQDEPFSTYFEDKVAIPENVSQVFSFRKLWAFTGPGFLMSIAYLDPGNIESDLQSGAKAGFKLLWVLLGATVIGLLLQRLAARLGVVTGMHLAEVCNRQYPTVPRIILWLMVELAIIGSDMQEVIGCAIAFNLLSVGRIPLWAGVLITITDTFVFLFLDKYGLRKLEAFFGFLITVMALSFGYEYVLVSPDQGELLKGMFLPYCAGCGPPQLEQAVGIVGAVIMPHNIYLHSALVKSRDIDRKNKKEVKEANKYYFIESTVALFVSFLINVFVVAVFAQAFYGKTNIEMNKECNATGSPHSGLFPLNNGTLEVDIYKGGVVLGCVFGPAALYIWAIGILAAGQSSTMTGTYSGQFVMEGFLNLRW…
XP_028430943.1	MKRGKNEKSKLKDSPQWDGVQTNQYSSISPPVSPVAQDEPFSTYFEDKVAIPENVSQVFSFRKLWAFTGPGFLMSIAYLDPGNIESDLQSGATAGFKILWVLLGATVIGLLLQRLAARLGVVTGMHLAEVCNRQYPTVPRIILWLMVELAIIGSDIQEVIGCAIAFNLLSVGRIPLWAGVLITITDTFVFLFLDKYGLRKLEAFFGFLITVMALSFGYEYVLVSPDQGELLKGMFLPYCAGCGLPQLEQAVGIVGAVIMPHNIYLHSALVKSRDIDRRNKKEVKEANKYYFIESTVALFVSFLINVFVVAVFAQAFYGKTNIEMNKECNATGSPHSGLFPLNNGTLEVDIYKGGVVLGCVFGPAALYIWAIGILAAGQSSTMTGTYSGQFVMEGFLNLR…
TNN81272.1	MFQQSRYTVLTAQNGLQQEDTRFELREKKEKKTIWKIQDSGKLETQHPAGGGRRQVQRHAAVVIGLIDVGTTVHELSGHSVLPRVTGHVERCVPENTNDATHQGIPQPSLMKAEQEGDLLEEDSPQDNGVQTNQYSSISPPSSPVAQDEPFSTYFEDKVAIPANVSQVFSFRKLWAFTGPGFLMSIAYLDPGNIESDLQSGAKAGFKLLWILLGATIIGLLLQRLAARLGVVTGMHLAEVCNRQYPTVPRVMLWLMVELAIIGSDMQEVIGCAIALNLLSMGSIPLWAGVLITITDTFVFLFLDKYGLRKLEAFFGFLITVMALSFGYEYVLVKPNQGELLKGMFVPYCADCGPVQLEQAVGIVGAVIMPHNIYLHSALVKSRDIDRKNKNEVKEANKY…
XP_028261425.1	MKAEQEGDLLEEGCSQENGVQTNPYSSISPPASPLDQDEPFSTYFEDRVPIPEDVNQVFSLRKLWAFTGPGFLMSIAYLDPGNIESDLQSGAKAGFKLLWVLLGATIIGLLLQRLAARLGVVTGMHLAEVCNRQYPTVPRIILWLMVELAIIGSDMQEVIGCAIALNLLSVGRIPLWGGVLITITDTFVFLFLDKYGLRKLEAFFGFLITVMALSFGYEYVVVKPDQGELLKGMFLPYCADCGPLQLEQAVGIVGAVIMPHNIYLHSALVKSREVDRKNKKEVKEANKYFFIESTIALFISFLINVFVVAVFAEAFYNKTNMMVNEECNATGSPLSNLFPLNNETLEVDIYKGGVVLGCFFGPAALYIWAIGILAAGQSSTMTGTYSGQFVMEGFLNLR…
XP_028261426.1	MEGRKNEKSRLKGCSQENGVQTNPYSSISPPASPLDQDEPFSTYFEDRVPIPEDVNQVFSLRKLWAFTGPGFLMSIAYLDPGNIESDLQSGAKAGFKLLWVLLGATIIGLLLQRLAARLGVVTGMHLAEVCNRQYPTVPRIILWLMVELAIIGSDMQEVIGCAIALNLLSVGRIPLWGGVLITITDTFVFLFLDKYGLRKLEAFFGFLITVMALSFGYEYVVVKPDQGELLKGMFLPYCADCGPLQLEQAVGIVGAVIMPHNIYLHSALVKSREVDRKNKKEVKEANKYFFIESTIALFISFLINVFVVAVFAEAFYNKTNMMVNEECNATGSPLSNLFPLNNETLEVDIYKGGVVLGCFFGPAALYIWAIGILAAGQSSTMTGTYSGQFVMEGFLNLR…
XP_028261427.1	MSIAYLDPGNIESDLQSGAKAGFKLLWVLLGATIIGLLLQRLAARLGVVTGMHLAEVCNRQYPTVPRIILWLMVELAIIGSDMQEVIGCAIALNLLSVGRIPLWGGVLITITDTFVFLFLDKYGLRKLEAFFGFLITVMALSFGYEYVVVKPDQGELLKGMFLPYCADCGPLQLEQAVGIVGAVIMPHNIYLHSALVKSREVDRKNKKEVKEANKYFFIESTIALFISFLINVFVVAVFAEAFYNKTNMMVNEECNATGSPLSNLFPLNNETLEVDIYKGGVVLGCFFGPAALYIWAIGILAAGQSSTMTGTYSGQFVMEGFLNLRWSRFARVLLTRSIAITPTLLVAIFQDVEHLTGMNDFLNVLQSMQLPFALIPILTFTSLTSIMNDFANGLVWKI…
XP_013885268.1	MSSDLKMNGEKTEEFKLKDSGQENGVQTNHYSSISPPASPVLQEEPFSTYFDEKVHIPEAPNQMFSFRKLWAFTGPGFLMSIAYLDPGNIESDLQSGAKAGFKLLWVLLGATIIGLLLQRLAARLGVVTGMHLAEVCNRQYPTVPRIILWLMVELAIIGSDMQEVIGCAIAFNLLSVGRIPLWAGVLITITDTFAFLFLDKYGLRKLEAFFGFLITVMAISFGYEYVLVKPDQGEVLKGMFMPYCAGCGPVQLEQAVGIVGAVIMPHNIYLHSALVKSRDVDRKKKEDVKEANKYFFIESTIALFISFLINVFVVAVFAQAFYDKTNIQVNDMCNATGSPHTNLFPLNNNTLEVDIYKGGVVLGCFFGPAALYIWAIGILAAGQSSTMTGTYSGQFVME…
XP_013885269.1	MTDVQDGDILEEDSGQENGVQTNHYSSISPPASPVLQEEPFSTYFDEKVHIPEAPNQMFSFRKLWAFTGPGFLMSIAYLDPGNIESDLQSGAKAGFKLLWVLLGATIIGLLLQRLAARLGVVTGMHLAEVCNRQYPTVPRIILWLMVELAIIGSDMQEVIGCAIAFNLLSVGRIPLWAGVLITITDTFAFLFLDKYGLRKLEAFFGFLITVMAISFGYEYVLVKPDQGEVLKGMFMPYCAGCGPVQLEQAVGIVGAVIMPHNIYLHSALVKSRDVDRKKKEDVKEANKYFFIESTIALFISFLINVFVVAVFAQAFYDKTNIQVNDMCNATGSPHTNLFPLNNNTLEVDIYKGGVVLGCFFGPAALYIWAIGILAAGQSSTMTGTYSGQFVMEGFLNLK…
XP_013885270.1	MSSDLKMNGEKTEEFKLKDSGQENGVQTNHYSSISPPASPVLQEEPFSTYFDEKVHIPEAPNQMFSFRKLWAFTGPGFLMSIAYLDPGNIESDLQSGAKAGFKLLWVLLGATIIGLLLQRLAARLGVVTGMHLAEVCNRQYPTVPRIILWLMVELAIIGSDMQEVIGCAIAFNLLSVGRIPLWAGVLITITDTFAFLFLDKYGLRKLEAFFGFLITVMAISFGYEYVLVKPDQGEVLKGMFMPYCAGCGPVQLEQAVGIVGAVIMPHNIYLHSALVKSRDVDRKKKEDVKEANKYFFIESTIALFISFLINVFVVAVFAQAFYDKTNIQVNDMCNATGSPHTNLFPLNNNTLEVDIYKGGVVLGCFFGPAALYIWAIGILAAGQSSTMTGTYSGQFVME…
XP_013885271.1	MTDVQDGDILEEDSGQENGVQTNHYSSISPPASPVLQEEPFSTYFDEKVHIPEAPNQMFSFRKLWAFTGPGFLMSIAYLDPGNIESDLQSGAKAGFKLLWVLLGATIIGLLLQRLAARLGVVTGMHLAEVCNRQYPTVPRIILWLMVELAIIGSDMQEVIGCAIAFNLLSVGRIPLWAGVLITITDTFAFLFLDKYGLRKLEAFFGFLITVMAISFGYEYVLVKPDQGEVLKGMFMPYCAGCGPVQLEQAVGIVGAVIMPHNIYLHSALVKSRDVDRKKKEDVKEANKYFFIESTIALFISFLINVFVVAVFAQAFYDKTNIQVNDMCNATGSPHTNLFPLNNNTLEVDIYKGGVVLGCFFGPAALYIWAIGILAAGQSSTMTGTYSGQFVMEGFLNLK…
XP_017271282.1	MTDKRDGDPLEEDSWQENGVHTNHYSSISPSGSPVVQEEPFSTYFEEKVPIPEAPSQVFSFRKLWAFTGPGFLMSIAYLDPGNIESDLQSGAKAGFKLLWVLLGATIIGLLLQRLAARLGVVTGMHLAEVCNRQYPTVPRVILWLMVELAIIGSDMQEVIGCAIAFNLLSMGRIPLWAGVLITITDTFVFLFLDKYGLRKLEAFFGFLITVMALSFGYEYVLVKPDQGEVLKGMFVPYCADCGPMQLEQAVGIVGAVIMPHNIYLHSALVKSRDVDRRKKDDVKEANKYFFIESTIALFISFLINVFVVAVFAQAFYNKTNIQVNEMCNATGSPHTDLFPLNNGTLEVDIYKGGVVLGCFFGPAALYIWAIGILAAGQSSTMTGTYSGQFVMEGFLNLR…
XP_017271281.2	MKGGKTEKSGLKDSWQENGVHTNHYSSISPSGSPVVQEEPFSTYFEEKVPIPEAPSQVFSFRKLWAFTGPGFLMSIAYLDPGNIESDLQSGAKAGFKLLWVLLGATIIGLLLQRLAARLGVVTGMHLAEVCNRQYPTVPRVILWLMVELAIIGSDMQEVIGCAIAFNLLSMGRIPLWAGVLITITDTFVFLFLDKYGLRKLEAFFGFLITVMALSFGYEYVLVKPDQGEVLKGMFVPYCADCGPMQLEQAVGIVGAVIMPHNIYLHSALVKSRDVDRRKKDDVKEANKYFFIESTIALFISFLINVFVVAVFAQAFYNKTNIQVNEMCNATGSPHTDLFPLNNGTLEVDIYKGGVVLGCFFGPAALYIWAIGILAAGQSSTMTGTYSGQFVMEGFLNLR…
XP_024861614.1	MTDKRDGDPLEEDSWQENGVHTNHYSSISPSGSPVVQEEPFSTYFEEKVPIPEAPSQVFSFRKLWAFTGPGFLMSIAYLDPGNIESDLQSGAKAGFKLLWVLLGATIIGLLLQRLAARLGVVTGMHLAEVCNRQYPTVPRVILWLMVELAIIGSDMQEVIGCAIAFNLLSMGRIPLWAGVLITITDTFVFLFLDKYGLRKLEAFFGFLITVMALSFGYEYVLVKPDQGEVLKGMFVPYCADCGPMQLEQAVGIVGAVIMPHNIYLHSALVKSRDVDRRKKDDVKEANKYFFIESTIALFISFLINVFVVAVFAQAFYNKTNIQVNEMCNATGSPHTDLFPLNNGTLEVDIYKGGVVLGCFFGPAALYIWAIGILAAGQSSTMTGTYSGQFVMEGFLNLR…
XP_024861615.1	MKGGKTEKSGLKDSWQENGVHTNHYSSISPSGSPVVQEEPFSTYFEEKVPIPEAPSQVFSFRKLWAFTGPGFLMSIAYLDPGNIESDLQSGAKAGFKLLWVLLGATIIGLLLQRLAARLGVVTGMHLAEVCNRQYPTVPRVILWLMVELAIIGSDMQEVIGCAIAFNLLSMGRIPLWAGVLITITDTFVFLFLDKYGLRKLEAFFGFLITVMALSFGYEYVLVKPDQGEVLKGMFVPYCADCGPMQLEQAVGIVGAVIMPHNIYLHSALVKSRDVDRRKKDDVKEANKYFFIESTIALFISFLINVFVVAVFAQAFYNKTNIQVNEMCNATGSPHTDLFPLNNGTLEVDIYKGGVVLGCFFGPAALYIWAIGILAAGQSSTMTGTYSGQFVMEGFLNLR…
XP_029287361.1	MKEGNNEKSRLKDSPDENVQTNQYSSISPPASPEAQDEPFSTYFEDKVAIPEDVSQVFSFRKLWAFTGPGFLMSIAYLDPGNIESDLQSGAKAGFKLLWILLGATIIGLLLQRLAARLGVVTGMHLAEVCNRQYPAVPRVILWMMVELAIIGSDMQEVIGCAIALNLLSMGSIPLWAGVLITITDTFVFLFLDKYGLRKLEAFFGFLITVMALSFGYEYVLVKPNQGELLKGMFIPYCADCGPVQLEQAVGIVGAVIMPHNIYLHSALVKSRDIDRKNKNEVKEANKYFFIEATIALFISFLINVFVVAVFAQAFFNKTNNDMNQMCNETGSQHTDLFPQNNETLQVDIYKGGVVLGCFFGPAALYIWAIGILAAGQSSTMTGTYSGQFVMEGFLNLRW…
XP_029287360.1	MKAEQDGDLVEEDSPDENVQTNQYSSISPPASPEAQDEPFSTYFEDKVAIPEDVSQVFSFRKLWAFTGPGFLMSIAYLDPGNIESDLQSGAKAGFKLLWILLGATIIGLLLQRLAARLGVVTGMHLAEVCNRQYPAVPRVILWMMVELAIIGSDMQEVIGCAIALNLLSMGSIPLWAGVLITITDTFVFLFLDKYGLRKLEAFFGFLITVMALSFGYEYVLVKPNQGELLKGMFIPYCADCGPVQLEQAVGIVGAVIMPHNIYLHSALVKSRDIDRKNKNEVKEANKYFFIEATIALFISFLINVFVVAVFAQAFFNKTNNDMNQMCNETGSQHTDLFPQNNETLQVDIYKGGVVLGCFFGPAALYIWAIGILAAGQSSTMTGTYSGQFVMEGFLNLRW…
XP_029287363.1	MKEGNNEKSRLKDSPDENVQTNQYSSISPPASPEAQDEPFSTYFEDKVAIPEDVSQVFSFRKLWAFTGPGFLMSIAYLDPGNIESDLQSGAKAGFKLLWILLGATIIGLLLQRLAARLGVVTGMHLAEVCNRQYPAVPRVILWMMVELAIIGSDMQEVIGCAIALNLLSMGSIPLWAGVLITITDTFVFLFLDKYGLRKLEAFFGFLITVMALSFGYEYVLVKPNQGELLKGMFIPYCADCGPVQLEQAVGIVGAVIMPHNIYLHSALVKSRDIDRKNKNEVKEANKYFFIEATIALFISFLINVFVVAVFAQAFFNKTNNDMNQMCNETGSQHTDLFPQNNETLQVDIYKGGVVLGCFFGPAALYIWAIGILAAGQSSTMTGTYSGQFVMEGFLNLRW…
XP_029287362.1	MKAEQDGDLVEEDSPDENVQTNQYSSISPPASPEAQDEPFSTYFEDKVAIPEDVSQVFSFRKLWAFTGPGFLMSIAYLDPGNIESDLQSGAKAGFKLLWILLGATIIGLLLQRLAARLGVVTGMHLAEVCNRQYPAVPRVILWMMVELAIIGSDMQEVIGCAIALNLLSMGSIPLWAGVLITITDTFVFLFLDKYGLRKLEAFFGFLITVMALSFGYEYVLVKPNQGELLKGMFIPYCADCGPVQLEQAVGIVGAVIMPHNIYLHSALVKSRDIDRKNKNEVKEANKYFFIEATIALFISFLINVFVVAVFAQAFFNKTNNDMNQMCNETGSQHTDLFPQNNETLQVDIYKGGVVLGCFFGPAALYIWAIGILAAGQSSTMTGTYSGQFVMEGFLNLRW…
XP_029007453.1	MKAEHDGDLLEEDSPQENGVQSNQYSTITSPASPVVEDNPFSTYFEDKVHIPESPNTVFSFRKLWAFTGPGFLMSIAYLDPGNIESDLQSGARAGFKLLWVLLASTIIGLLLQRLAARLGVVTGMHLAEVCNRQYPTVPRIILWLMVELAIIGSDMQEVIGCAIALNLLSVGRIPLWAGVLITITDTFVFLFLDKYGLRKLEAFFGFLITVMAVSFGYEYVLVKPDQGELLKGMFLPYCAGCGPAQLEQAVGIVGAVIMPHNIYLHSALVKSREVDRKDKKEVKEANKYFFIESSIALFVSFLINVFVVAVFAQAFYGKTNIDVSNMCNATGSPHTDLFPTNNETLEVDIYKGGVVLGCFFGPAALYIWAIGILAAGQSSTMTGTYSGQFVMEGFLNLR…
XP_029906749.1	MKEEKNEQSSLKDSPQENGIIQTSQYSSISPPASPVAQEEPFSTYFEEKVPVPEDVNQIFSFRKLWAFTGPGFLMSIAYLDPGNIESDLQSGAKAGFKLLWVLLGATIIGLLLQRLAARLGVVTGMHLAEVCNRQYPTVPRIILWLMVELAIIGSDMQEVIGCAIALNLLSVGRIPLWAGVLITIVDTFVFLFLDKYGLRKLEAFFGFLITIMAVSFGYEYVLVSPNQGEVLKGMFIPYCEGCGAVQLEQAVGIVGAVIMPHNIYLHSALVKSRQIDRGNKKEVKEANKYYFIESTIALFVSFLINVFVVAVFAEAFYMKTNMQVSAECNATGSPHTDLFPPDNNTLEVDIYKGGVVLGCFFGPAALYIWAIGILAAGQSSTMTGTYSGQFVMEGFLNL…
XP_029906748.1	MKAEQEGDLLEEDSPQENGIIQTSQYSSISPPASPVAQEEPFSTYFEEKVPVPEDVNQIFSFRKLWAFTGPGFLMSIAYLDPGNIESDLQSGAKAGFKLLWVLLGATIIGLLLQRLAARLGVVTGMHLAEVCNRQYPTVPRIILWLMVELAIIGSDMQEVIGCAIALNLLSVGRIPLWAGVLITIVDTFVFLFLDKYGLRKLEAFFGFLITIMAVSFGYEYVLVSPNQGEVLKGMFIPYCEGCGAVQLEQAVGIVGAVIMPHNIYLHSALVKSRQIDRGNKKEVKEANKYYFIESTIALFVSFLINVFVVAVFAEAFYMKTNMQVSAECNATGSPHTDLFPPDNNTLEVDIYKGGVVLGCFFGPAALYIWAIGILAAGQSSTMTGTYSGQFVMEGFLNL…
XP_029906751.1	MKEEKNEQSSLKDSPQENGIIQTSQYSSISPPASPVAQEEPFSTYFEEKVPVPEDVNQIFSFRKLWAFTGPGFLMSIAYLDPGNIESDLQSGAKAGFKLLWVLLGATIIGLLLQRLAARLGVVTGMHLAEVCNRQYPTVPRIILWLMVELAIIGSDMQEVIGCAIALNLLSVGRIPLWAGVLITIVDTFVFLFLDKYGLRKLEAFFGFLITIMAVSFGYEYVLVSPNQGEVLKGMFIPYCEGCGAVQLEQAVGIVGAVIMPHNIYLHSALVKSRQIDRGNKKEVKEANKYYFIESTIALFVSFLINVFVVAVFAEAFYMKTNMQVSAECNATGSPHTDLFPPDNNTLEVDIYKGGVVLGCFFGPAALYIWAIGILAAGQSSTMTGTYSGQFVMEGFLNL…
XP_029906750.1	MKAEQEGDLLEEDSPQENGIIQTSQYSSISPPASPVAQEEPFSTYFEEKVPVPEDVNQIFSFRKLWAFTGPGFLMSIAYLDPGNIESDLQSGAKAGFKLLWVLLGATIIGLLLQRLAARLGVVTGMHLAEVCNRQYPTVPRIILWLMVELAIIGSDMQEVIGCAIALNLLSVGRIPLWAGVLITIVDTFVFLFLDKYGLRKLEAFFGFLITIMAVSFGYEYVLVSPNQGEVLKGMFIPYCEGCGAVQLEQAVGIVGAVIMPHNIYLHSALVKSRQIDRGNKKEVKEANKYYFIESTIALFVSFLINVFVVAVFAEAFYMKTNMQVSAECNATGSPHTDLFPPDNNTLEVDIYKGGVVLGCFFGPAALYIWAIGILAAGQSSTMTGTYSGQFVMEGFLNL…
XP_015815219.1	MTAEQHRDFLEEDPQQENGVHTNHYSSISPPSSPVVQEEPFSTYFEEKVHIPESPNQVFSFRKLWAFTGPGFLMSIAYLDPGNIESDLQSGAKAGFKLLWILLVSTIIGLLLQRLAARLGVVTGMHLAEVCNRQYPTIPRIILWLMVELAIIGSDMQEVIGCAIAFNLLSVGRIPLWAGVLITITDTFVFLFLDKYGLRKLEAFFGFLITVMAVSFGYEYVLVKPDQGEVLKGMFVPYCAGCGPVQLEQAVGIVGAVIMPHNIYLHSALVKSREVDRKDKKEVKEANKYFFIESSIALFVSFLINVFVVAVFAQAFYNKTNIDVNAMCNATGSPHTDLFPLNNGTLEVDIYKGGVVLGCFFGPAALYIWAIGILAAGQSSTMTGTYSGQFVMEGFLNLK…
XP_015815217.1	MGRSKFIPQFPREPCNLMTAEQHRDFLEEDPQQENGVHTNHYSSISPPSSPVVQEEPFSTYFEEKVHIPESPNQVFSFRKLWAFTGPGFLMSIAYLDPGNIESDLQSGAKAGFKLLWILLVSTIIGLLLQRLAARLGVVTGMHLAEVCNRQYPTIPRIILWLMVELAIIGSDMQEVIGCAIAFNLLSVGRIPLWAGVLITITDTFVFLFLDKYGLRKLEAFFGFLITVMAVSFGYEYVLVKPDQGEVLKGMFVPYCAGCGPVQLEQAVGIVGAVIMPHNIYLHSALVKSREVDRKDKKEVKEANKYFFIESSIALFVSFLINVFVVAVFAQAFYNKTNIDVNAMCNATGSPHTDLFPLNNGTLEVDIYKGGVVLGCFFGPAALYIWAIGILAAGQSSTM…
XP_015815218.1	MGRSKFIPQFPREPCNLMTAEQHRDFLEEDPQQENGVHTNHYSSISPPSSPVVQEEPFSTYFEEKVHIPESPNQVFSFRKLWAFTGPGFLMSIAYLDPGNIESDLQSGAKAGFKLLWILLVSTIIGLLLQRLAARLGVVTGMHLAEVCNRQYPTIPRIILWLMVELAIIGSDMQEVIGCAIAFNLLSVGRIPLWAGVLITITDTFVFLFLDKYGLRKLEAFFGFLITVMAVSFGYEYVLVKPDQGEVLKGMFVPYCAGCGPVQLEQAVGIVGAVIMPHNIYLHSALVKSREVDRKDKKEVKEANKYFFIESSIALFVSFLINVFVVAVFAQAFYNKTNIDVNAMCNATGSPHTDLFPLNNGTLEVDIYKGGVVLGCFFGPAALYIWAIGILAAGQSSTM…
XP_015815220.1	MGEKMERSKRKDPQQENGVHTNHYSSISPPSSPVVQEEPFSTYFEEKVHIPESPNQVFSFRKLWAFTGPGFLMSIAYLDPGNIESDLQSGAKAGFKLLWILLVSTIIGLLLQRLAARLGVVTGMHLAEVCNRQYPTIPRIILWLMVELAIIGSDMQEVIGCAIAFNLLSVGRIPLWAGVLITITDTFVFLFLDKYGLRKLEAFFGFLITVMAVSFGYEYVLVKPDQGEVLKGMFVPYCAGCGPVQLEQAVGIVGAVIMPHNIYLHSALVKSREVDRKDKKEVKEANKYFFIESSIALFVSFLINVFVVAVFAQAFYNKTNIDVNAMCNATGSPHTDLFPLNNGTLEVDIYKGGVVLGCFFGPAALYIWAIGILAAGQSSTMTGTYSGQFVMEGFLNLKW…
XP_007561253.1	MSSRKQERSRLKDPRQENGVQSNHYSAISPPASPLAQEEPFSTYFEERVPIPESPNQMFSFRKLWAFTGPGFLMSIAYLDPGNIESDLQSGAKAGFKLLWVLLVSTVIGLLLQRLAARLGVVTGMHLAEVCNRQYPTVPRILLWLMIELAIIGSDMQEVIGCAIAFNLLSVGRIPLWAGVLITITDTFVFLFLDKYGLRKLEAFFGFLITVMAISFGYEYVLVKPDQGEVLKGMFLPYCADCGPVQLEQAVGIVGAVIMPHNIYLHSALVKSREVDRKNKKEVKEANKYFFIESSIALFVSFLINVFVVAVFAQAFYNKTNMDVNHECNATGINRTDLFPLNNSTLEVDIYKGGVVLGCFFGPAALYIWAVGILAAGQSSTMTGTYSGQFVMEGFLNLK…
XP_014899914.1	MSSRKQERSRLKDPRQENGVQSNHYSAISPPASPLAQEEPFSTYFEERVPIPESPNQMFSFRKLWAFTGPGFLMSIAYLDPGNIESDLQSGAKAGFKLLWVLLVSTVIGLLLQRLAARLGVVTGMHLAEVCNRQYPTVPRILLWLMIELAIIGSDMQEVIGCAIAFNLLSVGRIPLWAGVLITITDTFVFLFLDKYGLRKLEAFFGFLITVMAISFGYEYVLVKPDQGEVLKGMFLPYCADCGPVQLEQAVGIVGAVIMPHNIYLHSALVKSREVDRKNKKEVKEANKYFFIESSIALFVSFLINVFVVAVFAQAFYNKTNMDVNHECNATGINRTDLFPLNNSTLEVDIYKGGVVLGCFFGPAALYIWAVGILAAGQSSTMTGTYSGQFVMEGFLNLK…
XP_014859705.1	MSSAKQERTRLKDPRQENGVQSNHYSAISPPASPLAQEEPFSTYFEERVPIPESPNQMFSFRKLWAFTGPGFLMSIAYLDPGNIESDLQSGAKAGFKLLWVLLVSTVIGLLLQRLAARLGVVTGMHLAEVCNRQYPTVPRILLWLMIELAIIGSDMQEVIGCAIAFNLLSVGRIPLWAGVLITITDTFVFLFLDKYGLRKLEAFFGFLITVMAISFGYEYVLVKPDQGEVLKGMFLPYCADCGPVQLEQAVGIVGAVIMPHNIYLHSALVKSREVDRKNKKEVKEANKYFFIESSIALFVSFLINVFVVAVFAQAFYNKTNMDVNHECNATGINRTDLFPLNNGTLEVDIYKGGVVLGCFFGPAALYIWAVGILAAGQSSTMTGTYSGQFVMEGFLNLK…
XP_014899913.1	MTGEQNGDLLEEDPRQENGVQSNHYSAISPPASPLAQEEPFSTYFEERVPIPESPNQMFSFRKLWAFTGPGFLMSIAYLDPGNIESDLQSGAKAGFKLLWVLLVSTVIGLLLQRLAARLGVVTGMHLAEVCNRQYPTVPRILLWLMIELAIIGSDMQEVIGCAIAFNLLSVGRIPLWAGVLITITDTFVFLFLDKYGLRKLEAFFGFLITVMAISFGYEYVLVKPDQGEVLKGMFLPYCADCGPVQLEQAVGIVGAVIMPHNIYLHSALVKSREVDRKNKKEVKEANKYFFIESSIALFVSFLINVFVVAVFAQAFYNKTNMDVNHECNATGINRTDLFPLNNSTLEVDIYKGGVVLGCFFGPAALYIWAVGILAAGQSSTMTGTYSGQFVMEGFLNLK…
XP_007561252.1	MTGQQNGDLLEEDPRQENGVQSNHYSAISPPASPLAQEEPFSTYFEERVPIPESPNQMFSFRKLWAFTGPGFLMSIAYLDPGNIESDLQSGAKAGFKLLWVLLVSTVIGLLLQRLAARLGVVTGMHLAEVCNRQYPTVPRILLWLMIELAIIGSDMQEVIGCAIAFNLLSVGRIPLWAGVLITITDTFVFLFLDKYGLRKLEAFFGFLITVMAISFGYEYVLVKPDQGEVLKGMFLPYCADCGPVQLEQAVGIVGAVIMPHNIYLHSALVKSREVDRKNKKEVKEANKYFFIESSIALFVSFLINVFVVAVFAQAFYNKTNMDVNHECNATGINRTDLFPLNNSTLEVDIYKGGVVLGCFFGPAALYIWAVGILAAGQSSTMTGTYSGQFVMEGFLNLK…
XP_014859704.1	MTGQQNGDLLEEDPRQENGVQSNHYSAISPPASPLAQEEPFSTYFEERVPIPESPNQMFSFRKLWAFTGPGFLMSIAYLDPGNIESDLQSGAKAGFKLLWVLLVSTVIGLLLQRLAARLGVVTGMHLAEVCNRQYPTVPRILLWLMIELAIIGSDMQEVIGCAIAFNLLSVGRIPLWAGVLITITDTFVFLFLDKYGLRKLEAFFGFLITVMAISFGYEYVLVKPDQGEVLKGMFLPYCADCGPVQLEQAVGIVGAVIMPHNIYLHSALVKSREVDRKNKKEVKEANKYFFIESSIALFVSFLINVFVVAVFAQAFYNKTNMDVNHECNATGINRTDLFPLNNGTLEVDIYKGGVVLGCFFGPAALYIWAVGILAAGQSSTMTGTYSGQFVMEGFLNLK…
XP_008408206.1	MSSGKQERSRLKESRQENGVQSNHYSAISPPASPVAQEEPFSTYFEARVPIPESPNQMFSFRKLWAFTGPGFLMSIAYLDPGNIESDLQSGAKAGFKLLWVLLVSTIIGLLLQRLAARLGVVTGMHLAEVCNRQYPTVPRILLWLMVELAIIGSDMQEVIGCAIAFNLLSVGRIPLWAGVLITITDTFVFLFLDKYGLRKLEAFFGFLITVMAISFGYEYVLVKPDQGELLKGMFLPYCADCGPVQLEQAVGIVGAVIMPHNIYLHSALVKSREVDRKNKKEVKEANKYFFIESSIALFVSFLINVFVVAVFAQAFYNKTNMDVNHECNATGINRTDLFPLNNGTLEVDIYKGGVVLGCFFGPAALYIWAVGILAAGQSSTMTGTYSGQFVMEGFLNLK…
XP_008408204.1	MTGEQNGDLLEEESRQENGVQSNHYSAISPPASPVAQEEPFSTYFEARVPIPESPNQMFSFRKLWAFTGPGFLMSIAYLDPGNIESDLQSGAKAGFKLLWVLLVSTIIGLLLQRLAARLGVVTGMHLAEVCNRQYPTVPRILLWLMVELAIIGSDMQEVIGCAIAFNLLSVGRIPLWAGVLITITDTFVFLFLDKYGLRKLEAFFGFLITVMAISFGYEYVLVKPDQGELLKGMFLPYCADCGPVQLEQAVGIVGAVIMPHNIYLHSALVKSREVDRKNKKEVKEANKYFFIESSIALFVSFLINVFVVAVFAQAFYNKTNMDVNHECNATGINRTDLFPLNNGTLEVDIYKGGVVLGCFFGPAALYIWAVGILAAGQSSTMTGTYSGQFVMEGFLNLK…
XP_023180614.1	MSSRKQERSRLKDSQQENGVQSNHYSTISPPASPVAQEEPFSTYFEERVPIPESPNQIFSFRKLWAFTGPGFLMSIAYLDPGNIESDLQSGAKAGFKLLWVLLVSTIIGLLLQRLAARLGVVTGMHLAEVCNRQYPTVPRIILWLMIELAIIGSDMQEVIGCAIAFNLLSVGRIPLWAGVLITITDTFVFLFLDKYGLRKLEAFFGFLITVMAISFGYEYVLVKPDQGEVLKGMFLPYCADCGPVQLEQAVGIVGAVIMPHNIYLHSALVKSREVDRKNKKEVKEANKYFFIESSIALFVSFLINVFVVAVFAQAFYNKTNMDVYDECNKTGIHHDDLFPLNNGTLEVDIYKGGVVLGCFFGPAALYIWAVGILAAGQSSTMTGTYSGQFVMEGFLNLK…
XP_027859993.1	MSSRKQERSRLKDSQQENGVQSNHYSTISPPASPVAQEEPFSTYFEERVPIPESPNQIFSFRKLWAFTGPGFLMSIAYLDPGNIESDLQSGAKAGFKLLWVLLVSTIIGLLLQRLAARLGVVTGMHLAEVCNRQYPTVPRIILWLMIELAIIGSDMQEVIGCAIAFNLLSVGRIPLWAGVLITITDTFVFLFLDKYGLRKLEAFFGFLITVMAISFGYEYVLVKPDQGEVLKGMFLPYCADCGPVQLEQAVGIVGAVIMPHNIYLHSALVKSREVDRKNKKEVKEANKYFFIESSVALFVSFLINVFVVAVFAQAFYNKTNMDVYDECNKTGIHHDDLFPLNNGTLEVDIYKGGVVLGCFFGPAALYIWAVGILAAGQSSTMTGTYSGQFVMEGFLNLK…
XP_005804321.2	MTGEQNGDLLEEDSQQENGVQSNHYSTISPPASPVAQEEPFSTYFEERVPIPESPNQIFSFRKLWAFTGPGFLMSIAYLDPGNIESDLQSGAKAGFKLLWVLLVSTIIGLLLQRLAARLGVVTGMHLAEVCNRQYPTVPRIILWLMIELAIIGSDMQEVIGCAIAFNLLSVGRIPLWAGVLITITDTFVFLFLDKYGLRKLEAFFGFLITVMAISFGYEYVLVKPDQGEVLKGMFLPYCADCGPVQLEQAVGIVGAVIMPHNIYLHSALVKSREVDRKNKKEVKEANKYFFIESSIALFVSFLINVFVVAVFAQAFYNKTNMDVYDECNKTGIHHDDLFPLNNGTLEVDIYKGGVVLGCFFGPAALYIWAVGILAAGQSSTMTGTYSGQFVMEGFLNLK…
XP_027859992.1	MTGEQNGDLLEEDSQQENGVQSNHYSTISPPASPVAQEEPFSTYFEERVPIPESPNQIFSFRKLWAFTGPGFLMSIAYLDPGNIESDLQSGAKAGFKLLWVLLVSTIIGLLLQRLAARLGVVTGMHLAEVCNRQYPTVPRIILWLMIELAIIGSDMQEVIGCAIAFNLLSVGRIPLWAGVLITITDTFVFLFLDKYGLRKLEAFFGFLITVMAISFGYEYVLVKPDQGEVLKGMFLPYCADCGPVQLEQAVGIVGAVIMPHNIYLHSALVKSREVDRKNKKEVKEANKYFFIESSVALFVSFLINVFVVAVFAQAFYNKTNMDVYDECNKTGIHHDDLFPLNNGTLEVDIYKGGVVLGCFFGPAALYIWAVGILAAGQSSTMTGTYSGQFVMEGFLNLK…
XP_027859994.1	MTGEQNGDLLEEDSQQENGVQSNHYSTISPPASPVAQEEPFSTYFEERVPIPESPNQIFSFRKLWAFTGPGFLMSIAYLDPGNIESDLQSGAKAGFKLLWVLLVSTIIGLLLQRLAARLGVVTGMHLAEVCNRQYPTVPRIILWLMIELAIIGSDMQEVIGCAIAFNLLSVGRIPLWAGVLITITDTFVFLFLDKYGLRKLEAFFGFLITVMAISFGYEYVLVKPDQGEVLKGMFLPYCADCGPVQLEQAVGIVGAVIMPHNIYLHSALVKSREVDRKNKKEVKEANKYFFIESSVALFVSFLINVFVVAVFAQAFYNKTNMDVYDECNKTGIHHDDLFPLNNGTLEVDIYKGGVVLGCFFGPAALYIWAVGILAAGQSSTMTGTYSGQFVMEGFLNLK…
XP_015253389.1	MTGGKEGRSRLYDFRQENGVQSSNYSSISPPASPEVQEEPFSTYFEDKVPIPESRNQIFSFRKLWAFTGPGFLMSIAYLDPGNIESDLQSGAKAGFKLLWVLLFATIIGLLLQRLAARLGVVTGMHLAEICNRQYPTVPRIILWLMIELAIIGSDMQEVIGCAIAFNLLSVGRIPLWAGVLITIADTFVFLFLDKYGLRKLEAFFGFLITVMAISFGYEYVLVKPDQGEVLKGMFLPYCANCGPVQLEQAVGIVGAVIMPHNIYLHSALVKSREVDRKNKKDVKEANKYFFIESSIALFVSFLINVFVVAVFAQAFYNKNNMEVNAVCNATGSPHTDLFPLNNGTLEVDIYKGGVVLGCFFGPAALYIWAIGILAAGQSSTMTGTYSGQFVMEGFLNLK…
XP_015253390.1	MSIAYLDPGNIESDLQSGAKAGFKLLWVLLFATIIGLLLQRLAARLGVVTGMHLAEICNRQYPTVPRIILWLMIELAIIGSDMQEVIGCAIAFNLLSVGRIPLWAGVLITIADTFVFLFLDKYGLRKLEAFFGFLITVMAISFGYEYVLVKPDQGEVLKGMFLPYCANCGPVQLEQAVGIVGAVIMPHNIYLHSALVKSREVDRKNKKDVKEANKYFFIESSIALFVSFLINVFVVAVFAQAFYNKNNMEVNAVCNATGSPHTDLFPLNNGTLEVDIYKGGVVLGCFFGPAALYIWAIGILAAGQSSTMTGTYSGQFVMEGFLNLKWSRFARVLLTRSIAITPTLLVAIFQDVEHLTGMNDFLNVLQSMQLPFALIPILTFTSLTSIMNDFANGLAWKI…
XP_021163547.1	MTAEPNGDLLEDDSRQDNGVQSSRYSAISPPASPEDQEEPFSTYFEERVPIPESPNQIFSFRKLWAFTGPGFLMSIAYLDPGNIESDLQSGAIAGFKLLWVLLVATIIGLLLQRLAARLGVVTGMHLAEVCNRQYRPVPRIILWLMIELAIIGSDMQEVIGCAIAFNLLSVGRIPLWAGVLITITDTFVFLFLDKYGLRKLEAFFGILITIMALSFGYEYVLVKPDQGELLKGMFLPYCADCGPMQLEQAVGIVGAVIMPHNIYLHSALVKSRDVDRKDKKAVKEANKYYFIESSIALFVSFLINVFVVAVFAQAFYNKTNMEVNAECNATGSPHSNLFPLNNHTLEVDIYKGGVVLGCFFGPAALYIWALGILAAGQSSTMTGTYSGQFVMEGFLNLK…
XP_004069179.1	MTAERDEDFLEDRQENGVETNHYSSIPPSPSPEDQDEAFSTYFEQKVHIPDTGNQIFSFRKLWAFTGPGFLMSIAYLDPGNIESDLQSGAKAGFKLLWVLLGATIIGLLLQRLAARLGVVTGMHLAEVCNRQYPIVPRILLWLMVELAIIGSDMQEVIGCAIAFNLLSVGRIPLWAGVLITITDTFVFLFLDKYGLRKLEAFFGLLITIMAISFGYEYVIVKPDQGELLKGMFLPYCAGCGPVQLEQAVGIVGAVIMPHNIYLHSALVKSRDVDRKNKKDVKEANKYFFIESAVALFVSFLINVFVVAVFAEAFFNKTNMDVNAMCNATGSRHTDLFPMNNDTLEVDIYKGGVVLGCFFGPAALYIWAVGILAAGQSSTMTGTYSGQFVMEGFLNLRWS…
XP_020559159.1	MKEGKSERSGLHRQENGVETNHYSSIPPSPSPEDQDEAFSTYFEQKVHIPDTGNQIFSFRKLWAFTGPGFLMSIAYLDPGNIESDLQSGAKAGFKLLWVLLGATIIGLLLQRLAARLGVVTGMHLAEVCNRQYPIVPRILLWLMVELAIIGSDMQEVIGCAIAFNLLSVGRIPLWAGVLITITDTFVFLFLDKYGLRKLEAFFGLLITIMAISFGYEYVIVKPDQGELLKGMFLPYCAGCGPVQLEQAVGIVGAVIMPHNIYLHSALVKSRDVDRKNKKDVKEANKYFFIESAVALFVSFLINVFVVAVFAEAFFNKTNMDVNAMCNATGSRHTDLFPMNNDTLEVDIYKGGVVLGCFFGPAALYIWAVGILAAGQSSTMTGTYSGQFVMEGFLNLRWS…
XP_024125438.1	MDMKEGQSEKSGLYQQENGVQTNHYSSISPSTSPEDQEEPFSTYFEQKVHIPETGSQIFSFRKLWAFTGPGFLMSIAYLDPGNIESDLQSGAKAGFKLLWVLLGATIIGLLLQRLAARLGVVTGMHLAEVCNRQYPTVPRVILWLMVELAIIGSDMQEVIGCAIAFNLLSVGRIPLWAGVLITITDTFVFLFLDKYGLRKLEAFFGVLITIMAISFGYEYVVVKPDQGELLKGMFVPYCAGCGPVQLEQAVGIVGAVIMPHNIYLHSALVKSRDVDRNNKKDVKEANKYFFIESAIALFVSFLINVFVVAVFAEAFYDKTNMEVNAVCNATGSPHSNLFPLNNATLEVDIYKGGVVLGCFFGPAALYIWAVGILAAGQSSTMTGTYSGQFVMEGFLNLR…
XP_010780229.1	MKAEQDEDLLEEDSPQENEAETNQYSSVSPPSSPVAQDEPFSTYFEDKVAIPDNVSQMFSFRKLWAFTGPGFLMSIAYLDPGNIESDLQSGAKAGYKLLWILLGATIIGLLLQRLAARLGVVTGMHLAEVCNRQYSTVPRVMLWVMVELAIIGSDMQEVIGCAIALNLLSVGRIPLWAGVLITITDTFVFLFLDKYGLRKLEAFFGFLITVMALSFGYEYVVAAPDQAELLKGMFIPYCAGCGSVQLEQAVGIVGAVIMPHNIYLHSALVKSRDIDRKNKNEVKEANKYYFIEATIALFISFLINVFVVAVFAEAFYGKTNNDMNQKCNETGLLPNDLFPRNNETLQVDIYKGGIVLGCIFGPAALYIWAIGILAAGQSSTMTGTYSGQFVMEGFLNLR…
XP_010780230.1	MKEGNNERSKLKDSPQENEAETNQYSSVSPPSSPVAQDEPFSTYFEDKVAIPDNVSQMFSFRKLWAFTGPGFLMSIAYLDPGNIESDLQSGAKAGYKLLWILLGATIIGLLLQRLAARLGVVTGMHLAEVCNRQYSTVPRVMLWVMVELAIIGSDMQEVIGCAIALNLLSVGRIPLWAGVLITITDTFVFLFLDKYGLRKLEAFFGFLITVMALSFGYEYVVAAPDQAELLKGMFIPYCAGCGSVQLEQAVGIVGAVIMPHNIYLHSALVKSRDIDRKNKNEVKEANKYYFIEATIALFISFLINVFVVAVFAEAFYGKTNNDMNQKCNETGLLPNDLFPRNNETLQVDIYKGGIVLGCIFGPAALYIWAIGILAAGQSSTMTGTYSGQFVMEGFLNLR…
XP_020498019.1	MEAEQDGDLLEEDSTQENVQTNKYSSITPPASPEDHGDNLTSTYFEEKVPIPGNIDQVFSFRKLWAFTGPGFLMSIAYLDPGNIESDLQSGAKAGFKLLWVLLGATIIGLLLQRLAARLGVVTGMHLAEVCNRQYPTVPRIILWLMVELAIIGSDMQEVIGCAIAFNLLSLGHIPLWAGVLITITDTFVFLFLDKYGLRKLEAFFGILITIMALSFGYEYVLVKPDQGELLKGMFVPYCAGCGKVQLLQAVGIVGAVIMPHNIYLHSALVKSRDIDRKNKNEVKEANKYYFIESTIALFVSFLINVFVVAVFAQAFYNKTNMQVNEECNATGSPHTDLFPLNNGTLEVDIYKGGVVLGCFFGPAALYIWAIGILAAGQSSTMTGTYAGQFVMEGFLNLQ…
XP_020498020.1	MKGVKNEWSKLKDSTQENVQTNKYSSITPPASPEDHGDNLTSTYFEEKVPIPGNIDQVFSFRKLWAFTGPGFLMSIAYLDPGNIESDLQSGAKAGFKLLWVLLGATIIGLLLQRLAARLGVVTGMHLAEVCNRQYPTVPRIILWLMVELAIIGSDMQEVIGCAIAFNLLSLGHIPLWAGVLITITDTFVFLFLDKYGLRKLEAFFGILITIMALSFGYEYVLVKPDQGELLKGMFVPYCAGCGKVQLLQAVGIVGAVIMPHNIYLHSALVKSRDIDRKNKNEVKEANKYYFIESTIALFVSFLINVFVVAVFAQAFYNKTNMQVNEECNATGSPHTDLFPLNNGTLEVDIYKGGVVLGCFFGPAALYIWAIGILAAGQSSTMTGTYAGQFVMEGFLNLQ…
XP_019736196.1	MKAQRDGDLLQEDSPHDQDIQSNQYNSISPPASPAELDEPFSTYFEEKVAIPENVNQVFSFKKLWAFTGPGFLMSIAYLDPGNIESDLQSGAEAGFKLLWVLLGATVIGLLLQRLAARLGVVTGMHLAEVCNRQYSTVPRILLWIMVELAIIGSDMQEVIGCAIALNLLSVGRIPLWAGVLITITDTFVFLFLDKYGLRKLEAFFGFLITVMALSFGYEYVLVKPNQGEVLKGMFVPYCDGCGPTQLEQAVGIVGAVIMPHNIYLHSALVKSRDIDRRNKKEVKEANKYFFIESTIALFVSFLINVFVVAVFAQAFYNKTNWDVNQVCNATSIPHQGLFPNNNETLEVDIYKGGVVLGCFFGPAALYIWAIGILAAGQSSTMTGTYSGQFVMEGFLNLR…
XP_026162952.1	MTSNDTKGVESYKIRDIVDFGTSSKLEMKGEKNEKSKLYDSSQDNGVQTNQYSSIAPAASPVAQEDPFTTYFEEKVPIPENVNQIFSFRKLWAFTGPGFLMSIAYLDPGNIESDLQSGAVAGFKLLWVLLGSTIIGLLLQRLAARLGVVTGMHLAEVCNRQYPTVPRVILWLMIELAIIGSDMQEVIGCAIALNLLSVGRIPLWGGVLITITDTFVFLFLDKYGLRKLEAFFGFLITVMAVSFGYEYVLVNPNQGGVLKGMFVPYCAGCGSQQLEQAVGIVGAVIMPHNIYLHSALVKSREVDRKNKKDVKEANKYFFIESAIALFISFLINVFVVAVFAQAFYNKTNMDVNAECNATGSPHTDLFPLNNDTLQVDIYKGGIVLGCFFGPAALYIWAIG…
XP_026162953.1	MNAQQEGDILEDDSSQDNGVQTNQYSSIAPAASPVAQEDPFTTYFEEKVPIPENVNQIFSFRKLWAFTGPGFLMSIAYLDPGNIESDLQSGAVAGFKLLWVLLGSTIIGLLLQRLAARLGVVTGMHLAEVCNRQYPTVPRVILWLMIELAIIGSDMQEVIGCAIALNLLSVGRIPLWGGVLITITDTFVFLFLDKYGLRKLEAFFGFLITVMAVSFGYEYVLVNPNQGGVLKGMFVPYCAGCGSQQLEQAVGIVGAVIMPHNIYLHSALVKSREVDRKNKKDVKEANKYFFIESAIALFISFLINVFVVAVFAQAFYNKTNMDVNAECNATGSPHTDLFPLNNDTLQVDIYKGGIVLGCFFGPAALYIWAIGILAAGQSSTMTGTYSGQFVMEGFLNLR…
XP_030634601.1	MAKQHDSVDQHSRLKDSPVQNGVTQSSPTHYSSISPPTSPVAQEDAFSTYFEEKVPVPDDVNQIFSFRKLWAFTGPGFLMSIAYLDPGNIESDLQSGAKAGFKLLWVLLGATIIGLLLQRLAARLGVVTGMHLAEVCHRQYPTVPRIILWLMVELAIIGSDMQEVIGCAIAFNLLSVGRIPLWGGVLITIIDTFVFLFLDKYGLRKLEAFFGFLITIMAISFGYEYVLVAPDQGEVLKGMFLPYCQGCGPVQLEQAVGIVGAVIMPHNIYLHSALVKSRQIDRGNRKEVKEANKYFFIESAIALFVSFLINVFVVAVFAEAFYDKTNVEVNQMCNKTGSPHTDLFPLNNSTLEVDIYKGGVVLGCFFGPAALYIWAIGILAAGQSSTMTGTYSGQFVME…
XP_030634602.1	MKMDQEPDLLEEDSPVQNGVTQSSPTHYSSISPPTSPVAQEDAFSTYFEEKVPVPDDVNQIFSFRKLWAFTGPGFLMSIAYLDPGNIESDLQSGAKAGFKLLWVLLGATIIGLLLQRLAARLGVVTGMHLAEVCHRQYPTVPRIILWLMVELAIIGSDMQEVIGCAIAFNLLSVGRIPLWGGVLITIIDTFVFLFLDKYGLRKLEAFFGFLITIMAISFGYEYVLVAPDQGEVLKGMFLPYCQGCGPVQLEQAVGIVGAVIMPHNIYLHSALVKSRQIDRGNRKEVKEANKYFFIESAIALFVSFLINVFVVAVFAEAFYDKTNVEVNQMCNKTGSPHTDLFPLNNSTLEVDIYKGGVVLGCFFGPAALYIWAIGILAAGQSSTMTGTYSGQFVMEGFL…
XP_030634603.1	MAKQHDSVDQHSRLKDSPVQNGVTQSSPTHYSSISPPTSPVAQEDAFSTYFEEKVPVPDDVNQIFSFRKLWAFTGPGFLMSIAYLDPGNIESDLQSGAKAGFKLLWVLLGATIIGLLLQRLAARLGVVTGMHLAEVCHRQYPTVPRIILWLMVELAIIGSDMQEVIGCAIAFNLLSVGRIPLWGGVLITIIDTFVFLFLDKYGLRKLEAFFGFLITIMAISFGYEYVLVAPDQGEVLKGMFLPYCQGCGPVQLEQAVGIVGAVIMPHNIYLHSALVKSRQIDRGNRKEVKEANKYFFIESAIALFVSFLINVFVVAVFAEAFYDKTNVEVNQMCNKTGSPHTDLFPLNNSTLEVDIYKGGVVLGCFFGPAALYIWAIGILAAGQSSTMTGTYSGQFVME…
AMK07600.1	MKTEQEEDIVEEDSGSQENGVIQTRHYNSVSPPSPSEQDDGFSTYFEDKVHIPEDANQFFSFRKLWAFTGPGFLMSIAYLDPGNIESDLQSGAKAGFKLLWVLLVATIIGLLLQRLAARLGVVTGMHLAEVCHRQYSPVPRIILWLMVELAIIGSDMQEVIGCAIALNLLSMGRIPLWGGVLITITDTFVFLFLDKYGLRKLEAFFGFLITVMAISFGYEYVLVKPNQADLLKGMFVPYCSGCGPVQLEQAVGIVGAVIMPHNIYLHSALVKSRDVDRKNKKDVKEANKYFFIESTIALFISFLINVFVVAVFAQAFYNKTNADVIQKCNETGSPHTNLFPPNGTLEVDIYKGGVVLGCYFGQAALYIWAIGILAAGQSSTMTGTYSGQFVMEGFLNLR…
XP_020792699.1	MMKTEQEGDIVEEDPGFQENGVVPAHQYSSVSPPSSPSEQDFSTYFEEKVHIPEGGNQFFSFRKLWAFTGPGFLMSIAYLDPGNIESDLQSGAKAGFKLLWVLLVATIIGLLLQRLAARLGVVTGMHLAEVCNRQYPTVPRIILWLMVELAIIGSDMQEVIGCAIALNLLSVGRIPLWGGVLITITDTFVFLFLDKYGLRKLEAFFGFLITVMALSFGYEYVLVKPDQGDLLKGMFVPYCSGCGPVQLEQAVGIVGAVIMPHNIYLHSALVKSRDVDRKNKKEVKEANKYFFIESSIALFVSFLINVFVVAVFAQAFYNKSNADVIQKCNETESPHTDLFPPNGTLEVDIYKGGVVLGCYFGQAALYIWAIGILAAGQSSTMTGTYSGQFVMEGFLNLR…
XP_020339158.1	MKEEKPNEHSNLKEPPQENGVIQSTQGLYSSTSPPASDDEPFSTYFEEKVPIPEDVTQVFSFRKLWAFTGPGFLMSIAYLDPGNIESDLQSGAKAGFKLLWVLLGATIIGLLLQRLAARLGVVTGMHLAEVCNRQYPTVPRIILWLMVELAIIGSDMQEVIGCAIAFNLLSMGRIPLWGGVLITIIDTFVFLFLDKYGLRKLEAFFGFLITIMAVSFGYEYVMVRPDQGELLKGMFLPYCENCDSAQMEQAVGIVGAVIMPHNIYLHSALVKSRQIDRGNKKEVKEANKYYFIESTIALFISFLINVFVVAVFAEAFYDKTNIEVNAKCNASGSPHTDLFPLDNSTLQVDIFKGGVVLGCFFGPAALYIWAIGILAAGQSSTMTGTYSGQFVMEGFLNL…
XP_024283289.1	MKEEKPNEHSNLKEPPQENGVIQSTQGLYSSTSPPASDDEPFSTYFEEKVPIPEDVTQVFSFRKLWAFTGPGFLMSIAYLDPGNIESDLQSGAKAGFKLLWVLLGATIIGLLLQRLAARLGVVTGMHLAEVCNRQYPTVPRILLWLMVELAIIGSDMQEVIGCAIAFNLLSMGRIPLWGGVLITIIDTFVFLFLDKYGLRKLEAFFGFLITIMAVSFGYEYVMVRPDQGELLKGMFLPYCENCDSAQMEQAVGIVGAVIMPHNIYLHSALVKSRQIDRGNKKEVKEANKYYFIESTIALFISFLINVFVVAVFAEAFYDKTNIEVNAKCNASGSPHTDLFPLDNSTLQVDIFKGGVVLGCFFGPAALYIWAIGILAAGQSSTMTGTYSGQFVMEGFLNL…
XP_021463898.1	MKEEKPNEHSNLKEPPQENGVIQSTQGLYSSTSPPASDDEPFSTYFEEKVPIPEDVTQMFSFRKLWAFTGPGFLMSIAYLDPGNIESDLQSGAKAGFKLLWVLLGATIIGLLLQRLAARLGVVTGMHLAEVCNRQYPTVPRIILWLMVELAIIGSDMQEVIGCAIAFNLLSMGRIPLWGGVLITIIDTFVFLFLDKYGLRKLEAFFGFLITIMAVSFGYEYVMVRPDQGELLKGMFLPYCENCDSAQMEQAVGIVGAVIMPHNIYLHSALVKSRQIDRGNKKEVKEANKYYFIESTIALFISFLINVFVVAVFAEAFYDKTNIEVNAKCNASGSPHTDLFPLDNSTLQVDIFKGGVVLGCFFGPAALYIWAIGILAAGQSSTMTGTYSGQFVMEGFLNL…
XP_029549602.1	MKEEKPNEHSNLNEPPQENGVIQSTQGLYSSTSPPASDDEPFSTYFEEKVPIPEDVTQMFSFRKLWAFTGPGFLMSIAYLDPGNIESDLQSGAKAGFKLLWVLLGATIIGLLLQRLAARLGVVTGMHLAEVCNRQYPTVPRIILWLMVELAIIGSDMQEVIGCAIAFNLLSMGRIPLWGGVLITIIDTFVFLFLDKYGLRKLEAFFGLLITIMAVSFGYEYVMVRPDQGELLKGMFLPYCENCDSAQMEQAVGIVGAVIMPHNIYLHSALVKSRQIDRGNKKEVKEANKYYFIESTIALFISFLINVFVVAVFAEAFYDKTNIEVNAKCNASGSPHTDLFPLDNSTLQVDIFKGGVVLGCFFGPAALYIWAIGILAAGQSSTMTGTYSGQFVMEGFLNL…
XP_029535765.1	MKEEKPNEHSNLKEPSQENGVIQSTQGLYSSTSPPASDDEPFSTYFEEKVPIPEDVTQVFSFRKLWAFTGPGFLMSIAYLDPGNIESDLQSGAKAGFKLLWVLLGATIIGLLLQRLAARLGVVTGMHLAEVCNRQYPTVPRIILWLMVELAIIGSDMQEVIGCAIAFNLLSMGRIPLWGGVLITIIDTFVFLFLDKYGLRKLEAFFGFLITIMAVSFGYEYVMVRPDQGELLKGMFLPYCENCDSSQMEQAVGIVGAVIMPHNIYLHSALVKSRQIDRGNKKEVKEANKYYFIESTIALFISFLINVFVVAVFAEAFYDKTNIEVNAKCNASGSPHTDLFPLDNSTLQVDIFKGGVVLGCFFGPAALYIWAIGILAAGQSSTMTGTYSGQFVMEGFLNL…
XP_020339159.1	METEREADLLEEEPPQENGVIQSTQGLYSSTSPPASDDEPFSTYFEEKVPIPEDVTQVFSFRKLWAFTGPGFLMSIAYLDPGNIESDLQSGAKAGFKLLWVLLGATIIGLLLQRLAARLGVVTGMHLAEVCNRQYPTVPRIILWLMVELAIIGSDMQEVIGCAIAFNLLSMGRIPLWGGVLITIIDTFVFLFLDKYGLRKLEAFFGFLITIMAVSFGYEYVMVRPDQGELLKGMFLPYCENCDSAQMEQAVGIVGAVIMPHNIYLHSALVKSRQIDRGNKKEVKEANKYYFIESTIALFISFLINVFVVAVFAEAFYDKTNIEVNAKCNASGSPHTDLFPLDNSTLQVDIFKGGVVLGCFFGPAALYIWAIGILAAGQSSTMTGTYSGQFVMEGFLNLR…
XP_024283290.1	METEREADLLEEEPPQENGVIQSTQGLYSSTSPPASDDEPFSTYFEEKVPIPEDVTQVFSFRKLWAFTGPGFLMSIAYLDPGNIESDLQSGAKAGFKLLWVLLGATIIGLLLQRLAARLGVVTGMHLAEVCNRQYPTVPRILLWLMVELAIIGSDMQEVIGCAIAFNLLSMGRIPLWGGVLITIIDTFVFLFLDKYGLRKLEAFFGFLITIMAVSFGYEYVMVRPDQGELLKGMFLPYCENCDSAQMEQAVGIVGAVIMPHNIYLHSALVKSRQIDRGNKKEVKEANKYYFIESTIALFISFLINVFVVAVFAEAFYDKTNIEVNAKCNASGSPHTDLFPLDNSTLQVDIFKGGVVLGCFFGPAALYIWAIGILAAGQSSTMTGTYSGQFVMEGFLNLR…
XP_023852587.1	METEREADLLEEEPPQENGVIQSTQGLYSSTSTPASDDEPFSTYFEEKVPIPEDVTQMFSFRKLWAFTGPGFLMSIAYLDPGNIESDLQSGAKAGFKLLWVLLGATIIGLLLQRLAARLGVVTGMHLAEVCNRQYPTVPRIILWLMVELAIIGSDMQEVIGCAIAFNLLSMGRIPLWGGVLITIIDTFVFLFLDKYGLRKLEAFFGFLITIMAISFGYEYVMVRPDQGELLKGMFLPYCENCDSAQMEQAVGIVGAVIMPHNIYLHSALVKSRQIDRGNKKEVKEANKYYFIESTIALFISFLINVFVVAVFAEAFYDKTNIEVNAKCNASGSPHTDLFPLDNSTLQVDIFKGGVVLGCFFGPAALYIWAIGILAAGQSSTMTGTYSGQFVMEGFLNLR…
XP_023852586.1	MKEEKPNEHSNLKEPPQENGVIQSTQGLYSSTSTPASDDEPFSTYFEEKVPIPEDVTQMFSFRKLWAFTGPGFLMSIAYLDPGNIESDLQSGAKAGFKLLWVLLGATIIGLLLQRLAARLGVVTGMHLAEVCNRQYPTVPRIILWLMVELAIIGSDMQEVIGCAIAFNLLSMGRIPLWGGVLITIIDTFVFLFLDKYGLRKLEAFFGFLITIMAISFGYEYVMVRPDQGELLKGMFLPYCENCDSAQMEQAVGIVGAVIMPHNIYLHSALVKSRQIDRGNKKEVKEANKYYFIESTIALFISFLINVFVVAVFAEAFYDKTNIEVNAKCNASGSPHTDLFPLDNSTLQVDIFKGGVVLGCFFGPAALYIWAIGILAAGQSSTMTGTYSGQFVMEGFLNL…
XP_014022690.1	MNDRASDLTILTEYIHRQISSPCVSRAPPPPPFNPNTLMDAEREADLLEDEPPQENGVIQSTQGLYSSTSPPASDDEPFSTYFEEKVPIPEDVTQMFSFRKLWAFTGPGFLMSIAYLDPGNIESDLQSGAKAGFKLLWVLLGATIIGLLLQRLAARLGVVTGMHLAEVCNRQYPTVPRIILWLMVELAIIGSDMQEVIGCAIAFNLLSMGRIPLWGGVLITIIDTFVFLFLDKYGLRKLEAFFGLLITIMAVSFGYEYVMVRPDQGELLKGMFLPYCENCDSAQMEQAVGIVGAVIMPHNIYLHSALVKSRQIDRGNKKEVKEANKYYFIESTIALFISFLINVFVVAVFAEAFYDKTNIEVNAKCNASGSPHTDLFPLDNSTLQVDIFKGGVVLGCFF…
XP_021463899.1	METEREADLLEEEPPQENGVIQSTQGLYSSTSPPASDDEPFSTYFEEKVPIPEDVTQMFSFRKLWAFTGPGFLMSIAYLDPGNIESDLQSGAKAGFKLLWVLLGATIIGLLLQRLAARLGVVTGMHLAEVCNRQYPTVPRIILWLMVELAIIGSDMQEVIGCAIAFNLLSMGRIPLWGGVLITIIDTFVFLFLDKYGLRKLEAFFGFLITIMAVSFGYEYVMVRPDQGELLKGMFLPYCENCDSAQMEQAVGIVGAVIMPHNIYLHSALVKSRQIDRGNKKEVKEANKYYFIESTIALFISFLINVFVVAVFAEAFYDKTNIEVNAKCNASGSPHTDLFPLDNSTLQVDIFKGGVVLGCFFGPAALYIWAIGILAAGQSSTMTGTYSGQFVMEGFLNLR…
NP_001165984.1	METEREADLLEEEPPQENGVIQSTQGLYSSTSPPASDDEPFSTYFEEKVPIPEDVTQMFSFRKLWAFTGPGFLMSIAYLDPGNIESDLQSGAKAGFKLLWVLLGATIIGLLLQRLAARLGVVTGMHLAEVCNRQYPTVPRIILWLMVELAIIGSDMQEVIGCAIAFNLLSMGRIPLWGGVLITIIDTFVFLFLDKYGLRKLEAFFGFLITTMAVSFGYEYVMVRPDQGELLKGMFLPYCENCDSAQMEQAVGIVGAVIMPHNIYLHSALVKSRQIDRGNKKEVKEANKYYFIESTIALFISFLINVFVVAVFAEAFYDKTNIEVNAKCNASGSPHTDLFPLDNSTLQVDILKGGVVLGCFFGPAALYIWAIGILAAGQSSTMTGTYSGQFVMEGFLNLR…
XP_024283291.1	METEREADLLEEEPPQENGVIQSTQGLYSSTSPPASDDEPFSTYFEEKVPIPEDVTQVFSFRKLWAFTGPGFLMSIAYLDPGNIESDLQSGAKAGFKLLWVLLGATIIGLLLQRLAARLGVVTGMHLAEVCNRQYPTVPRILLWLMVELAIIGSDMQEVIGCAIAFNLLSMGRIPLWGGVLITIIDTFVFLFLDKYGLRKLEAFFGFLITIMAVSFGYEYVMVRPDQGELLKGMFLPYCENCDSAQMEQAVGIVGAVIMPHNIYLHSALVKSRQIDRGNKKEVKEANKYYFIESTIALFISFLINVFVVAVFAEAFYDKTNIEVNAKCNASGSPHTDLFPLDNSTLQVDIFKGGVVLGCFFGPAALYIWAIGILAAGQSSTMTGTYSGQFVMEGFLNLR…
CDQ72803.1	MSLTHSLSLSLTHTEEPPQENGVIQSTQGLYSSTSPPASDDEPFSTYFEEKVPIPEDVTQMFSFRKLWAFTGPGFLMSIAYLDPGNIESDLQSGAKAGFKLLWVLLGATIIGLLLQRLAARLGVVTGMHLAEVCNRQYPTVPRIILWLMVELAIIGSDMQEVIGCAIAFNLLSMGRIPLWGGVLITIIDTFVFLFLDKYGLRKLEAFFGFLITIMAVSFGYEYVMVRPDQGELLKGMFLPYCENCDSAQMEQAVGIVGAVIMPHNIYLHSALVKSRQIDRGNKKEVKEANKYYFIESTIALFISFLINVFVVAVFAEAFYDKTNIEVNAKCNASGSPHTDLFPLDNSTLQVDIFKGGVVLGCFFGPAALYIWAIGILAAGQSSTMTGTYSGQFVMEGFL…
XP_029535775.1	METEREADLLEEEPSQENGVIQSTQGLYSSTSPPASDDEPFSTYFEEKVPIPEDVTQVFSFRKLWAFTGPGFLMSIAYLDPGNIESDLQSGAKAGFKLLWVLLGATIIGLLLQRLAARLGVVTGMHLAEVCNRQYPTVPRIILWLMVELAIIGSDMQEVIGCAIAFNLLSMGRIPLWGGVLITIIDTFVFLFLDKYGLRKLEAFFGFLITIMAVSFGYEYVMVRPDQGELLKGMFLPYCENCDSSQMEQAVGIVGAVIMPHNIYLHSALVKSRQIDRGNKKEVKEANKYYFIESTIALFISFLINVFVVAVFAEAFYDKTNIEVNAKCNASGSPHTDLFPLDNSTLQVDIFKGGVVLGCFFGPAALYIWAIGILAAGQSSTMTGTYSGQFVMEGFLNLR…
XP_029549603.1	METEREADLLEDEPPQENGVIQSTQGLYSSTSPPASDDEPFSTYFEEKVPIPEDVTQMFSFRKLWAFTGPGFLMSIAYLDPGNIESDLQSGAKAGFKLLWVLLGATIIGLLLQRLAARLGVVTGMHLAEVCNRQYPTVPRIILWLMVELAIIGSDMQEVIGCAIAFNLLSMGRIPLWGGVLITIIDTFVFLFLDKYGLRKLEAFFGLLITIMAVSFGYEYVMVRPDQGELLKGMFLPYCENCDSAQMEQAVGIVGAVIMPHNIYLHSALVKSRQIDRGNKKEVKEANKYYFIESTIALFISFLINVFVVAVFAEAFYDKTNIEVNAKCNASGSPHTDLFPLDNSTLQVDIFKGGVVLGCFFGPAALYIWAIGILAAGQSSTMTGTYSGQFVMEGFLNLR…
XP_014022691.1	MKEEKPNEHSNLNEPPQENGVIQSTQGLYSSTSPPASDDEPFSTYFEEKVPIPEDVTQMFSFRKLWAFTGPGFLMSIAYLDPGNIESDLQSGAKAGFKLLWVLLGATIIGLLLQRLAARLGVVTGMHLAEVCNRQYPTVPRIILWLMVELAIIGSDMQEVIGCAIAFNLLSMGRIPLWGGVLITIIDTFVFLFLDKYGLRKLEAFFGLLITIMAVSFGYEYVMVRPDQGELLKGMFLPYCENCDSAQMEQAVGIVGAVIMPHNIYLHSALVKSRQIDRGNKKEVKEANKYYFIESTIALFISFLINVFVVAVFAEAFYDKTNIEVNAKCNASGSPHTDLFPLDNSTLQVDIFKGGVVLGCFFGPAALYIWAIGILAAGQSSTMTGTYSGQFVMEGFLNL…
XP_020343604.1	MKTAWEADQEEEPPQENGVIQTTQDQHSSISPPSSTVSRAPDDEPFSTYFEEKVPIPEDVTQMFSFRKLWAFTGPGFLMSIAYLDPGNIESDLQSGAKAGFKLLWVLLGATIIGLLLQRLAARLGVVTGMHLAEVCNRQYPTVPRIILWLMVELAIIGSDMQEVIGCAIAFNLLSVGRIPLWGGVLITIIDTFVFLFLDKYGLRKLEAFFGFLITIMAVSFGYEYVMVRPDQGELLKGMFLPYCEGCGPAQMEQAVGIVGAVIMPHNIYLHSALVKSRSIDRGNKKEVKEANKYYFIESTIALFISFLINVFVVAVFAEAFYEKTNIEVNAMCNASDSPHTDLFPLDNSRLQVDIYKGGVVLGCFFGPVALYIWAIGILAAGQSSTMTGTYSGQFVMEG…
XP_020343595.1	MTFTRPYFLHAISRQISSPCVYRFLPPLGPPLTHPTLMKTAWEADQEEEPPQENGVIQTTQDQHSSISPPSSTVSRAPDDEPFSTYFEEKVPIPEDVTQMFSFRKLWAFTGPGFLMSIAYLDPGNIESDLQSGAKAGFKLLWVLLGATIIGLLLQRLAARLGVVTGMHLAEVCNRQYPTVPRIILWLMVELAIIGSDMQEVIGCAIAFNLLSVGRIPLWGGVLITIIDTFVFLFLDKYGLRKLEAFFGFLITIMAVSFGYEYVMVRPDQGELLKGMFLPYCEGCGPAQMEQAVGIVGAVIMPHNIYLHSALVKSRSIDRGNKKEVKEANKYYFIESTIALFISFLINVFVVAVFAEAFYEKTNIEVNAMCNASDSPHTDLFPLDNSRLQVDIYKGGVVL…
XP_029538933.1	MKTAWEADQEEEPPQENGVIQTTQDQHSSISPPSSTVSGAPDDEPFSTYFEEKVAIPEDVTQMFSFRKLWAFTGPGFLMSIAYLDPGNIESDLQSGAKAGFKLLWVLLGATIIGLLLQRLAARLGVVTGMHLAEVCNRQYPTVPRIILWLMVELAIIGSDMQEVIGCAIAFNLLSVGRIPLWGGVLITIIDTFVFLFLDKYGLRKLEAFFGFLITIMAVSFGYEYVMVRPDQGELLKGMFLPYCEGCGPAQMEQAVGIVGAVIMPHNIYLHSALVKSRSIDRGNKKEVKEANKYYFIESTIALFISFLINVFVVAVFAEAFYEKTNIEVNAMCNASDSPHTDLFPLDNSRLQVDIYKGGVVLGCFFGPVALYIWAIGILAAGQSSTMTGTYSGQFVMEG…
XP_024231616.1	MKTAWEADQEEEPPQENGVIQTTQDQHSSISPPSTVSGAPDDEPFSTYFEEKVPIPEDVTQMFSFRKLWAFTGPGFLMSIAYLDPGNIESDLQSGAKAGFKLLWVLLGATIIGLLLQRLAARLGVVTGMHLAEVCNRQYPTVPRIILWLMVELAIIGSDMQEVIGCAIAFNLLSVGRIPLWGGVLITIIDTFVFLFLDKYGLRKLEAFFGFLITIMAVSFGYEYVMVRPDQGELLKGMFLPYCEGCGPAQMEQAVGIVGAVIMPHNIYLHSALVKSRSIDRGNKKEVKEANKYYFIESTIALFISFLINVFVVAVFAEAFYEKTNIEVNAMCNASDSPHTDLFPLDNSRLQVDIYKGGVVLGCFFGPVALYIWAIGILAAGQSSTMTGTYSGQFVMEGF…
XP_023845290.1	MTILFTRYIQTDLQSLRLQSSPSPRPPFNTTLMKTAREADLEEEPPQENGVIQTTKDQHSSISPPGSTVSGAPDDEPFSTYFEEKVPIPEDVTQMFSFRKLWAFTGPGFLMSIAYLDPGNIESDLQSGAKAGFKLLWVLLGATIIGLLLQRLAARLGVVTGMHLAEVCNRQYPTVPRIILWLMVELAIIGSDMQEVIGCAIAFNLLSVGRIPLWGGVLITIIDTFVFLFLDKYGLRKLEAFFGFLITIMAVSFGYEYVMVRPDQGELLKGMFLPYCEGCGPAQMEQAVGIVGAVIMPHNIYLHSALVKSRSIDRGNKKEVKEANKYYFIESTIALFISFLINVFVVAVFAEAFYEKTNIEVNAMCNASDSPHTDLFPLDNSRLQVDIYKGGVVLGCFFG…
XP_023845299.1	MKTAREADLEEEPPQENGVIQTTKDQHSSISPPGSTVSGAPDDEPFSTYFEEKVPIPEDVTQMFSFRKLWAFTGPGFLMSIAYLDPGNIESDLQSGAKAGFKLLWVLLGATIIGLLLQRLAARLGVVTGMHLAEVCNRQYPTVPRIILWLMVELAIIGSDMQEVIGCAIAFNLLSVGRIPLWGGVLITIIDTFVFLFLDKYGLRKLEAFFGFLITIMAVSFGYEYVMVRPDQGELLKGMFLPYCEGCGPAQMEQAVGIVGAVIMPHNIYLHSALVKSRSIDRGNKKEVKEANKYYFIESTIALFISFLINVFVVAVFAEAFYEKTNIEVNAMCNASDSPHTDLFPLDNSRLQVDIYKGGVVLGCFFGPVALYIWAIGILAAGQSSTMTGTYSGQFVMEG…
XP_021423069.1	MKTAREADQEEEPPQENGIIQTTQDQHSSISPPSSTVSGAPDDEPFSTYFEEKVPIPEDVTQMFSLRKLWAFTGPGFLMSIAYLDPGNIESDLQSGAKAGFKLLWVLLGATIIGLLLQRLAARLGVVTGMHLAEVCNRQYPTVPRIILWLMVELAIIGSDMQEVIGCAIAFNLLSVGRIPLWGGVLITIIDTFVFLFLDKYGLRKLEAFFGFLITIMAVSFGYEYVMVRPDQGELLKGMFLPHCEGCGPAQMEQAVGIVGAVIMPHNIYLHSALVKSRSIDRGNKKEVKEANKYYFIESTIALFISFLINVFVVAVFAEAFYEKTNIEVNAMCNASDSPHTDLFPLDNSRLQVDIYKGGVVLGCFFGPVALYIWAIGILAAGQSSTMTGTYSGQFVMEG…
CDQ65753.1	MELIWNIFRRTFLPLPLLSSEEPPQENGIIQTTQDQHSSISPPSSTVSGAPDDEPFSTYFEEKVPIPEDVTQMFSLRKLWAFTGPGFLMSIAYLDPGNIESDLQSGAKAGFKLLWVLLGATIIGLLLQRLAARLGVVTGMHLAEVCNRQYPTVPRIILWLMVELAIIGSDMQEVIGCAIAFNLLSVGRIPLWGGVLITIIDTFVFLFLDKYGLRKLEAFFGFLITIMAVSFGYEYVMVRPDQGELLKGMFLPHCEGCGPAQMEQAVGIVGAVIMPHNIYLHSALVKSRSIDRGNKKEVKEANKYYFIESTIALFISFLINVFVVAVFAEAFYEKTNIEVNAMCNASDSPHTDLFPLDNSRLQVDIYKGGVVLGCFFGPVALYIWAIGILAAGQSSTMTG…
NP_001165986.1	MKTAREADQEEEPPQVNGIIQTTQDQHSSISPPSSTVSGAPDDEPFSTYFEEKVPIPEDVTQMFSLRKLWAFTGPGFLMSIAYLDPGNIESDLQSGAKAGFKLLWVLLGATIIGLLLQRLAARLGVVTGMHLAKVCNRQYPTVPRIILWLMVELAIIGSNMQEVIGCAIAFNLLSVGRIPLWGGVLITIIDTFVFLFLDKYGLRKLEAFFGFLITIMAVSFGYEYVMVRPDQGELLKGMFLPHCEGCGPAQMEQAVGIVGAVIMPHNIYLHSALVKSRSIDRGNKKEVKEANKYYFIESTIALFISFLINVFVVAVFAEAFYEKTNIEVNAMCNASDSPHTDLFPLDNSRLQVDIYKGGVVLGCFFGPVALYIWAIGILAAGQSSTMTGTYSGQFVMEG…
XP_029631499.1	MKTALEADLEEESLQENGVIQTTQDQHSSISPPASTVSGAPDDEPFSTYFEEKVPIPEDVTQMFSFRKLWAFTGPGFLMSIAYLDPGNIESDLQSGAKAGFKLLWVLLGATIIGLLLQRLAARLGVVTGMHLAEVCNRQYPTVPRIILWLMVELAIIGSDMQEVIGCAIAFNLLSVGRIPLWGGVLITIIDTFVFLFLDKYGLRKLEAFFGFLITIMAVSFGYEYVVVRPDQGELLKGMFLPYCEGCGPAQMEQAVGIVGAVIMPHNIYLHSALVKSRSIDRGNKKEVKEANKYYFIESTIALFISFLINVFVVAVFAEAFYEKTNIEVNAMCNASGSPHTDLFPLDNSRLQVDIYKGGVVLGCFFGPVALYIWAIGILAAGQSSTMTGTYSGQFVMEG…
XP_013988026.1	MKTAREADLEEESLQENGVIKTTQDQHSSISPPASTVSGVPDDEPFSTYFEEKVPIPEDVTQMFSFRKLWAFTGPGFLMSIAYLDPGNIESDLQSGAKAGFKLLWVLLGATIIGLLLQRLAARLGVVTGMHLAEVCNRQYPTVPRIILWLMVELAIIGSDMQEVIGCAIAFNLLSVGRIPLWGGVLITIIDTFVFLFLDKYGLRKLEAFFGFLITIMAVSFGYEYVMVRPDQGELLKGMFLPYCEGCGPAQMEQAVGIVGAVIMPHNIYLHSALVKSRSIDRGNKKEVKEANKYYFIESTIALFISFLINVFVVAVFAEAFYEKTNIEVNAMCNASGSPHTDLFPLDNSRLQVDIYKGGVVLGCFFGPVALYIWAIGILAAGQSSTMTGTYSGQFVMEG…
XP_029631501.1	MFSFRKLWAFTGPGFLMSIAYLDPGNIESDLQSGAKAGFKLLWVLLGATIIGLLLQRLAARLGVVTGMHLAEVCNRQYPTVPRIILWLMVELAIIGSDMQEVIGCAIAFNLLSVGRIPLWGGVLITIIDTFVFLFLDKYGLRKLEAFFGFLITIMAVSFGYEYVVVRPDQGELLKGMFLPYCEGCGPAQMEQAVGIVGAVIMPHNIYLHSALVKSRSIDRGNKKEVKEANKYYFIESTIALFISFLINVFVVAVFAEAFYEKTNIEVNAMCNASGSPHTDLFPLDNSRLQVDIYKGGVVLGCFFGPVALYIWAIGILAAGQSSTMTGTYSGQFVMEGFLNLRWSRFARVLLTRSIAIFPTLLVAIFQDVQHLTGMNDFLNVLQSMQLPFALIPILTFTS…
XP_020343619.1	MTFTRPYFLHAISRQISSPCVYRFLPPLGPPLTHPTLMKTAWEADQEEEPPQENGVIQTTQDQHSSISPPSSTVSRAPDDEPFSTYFEEKVPIPEDVTQMFSFRKLWAFTGPGFLMSIAYLDPGNIESDLQSGAKAGFKLLWVLLGATIIGLLLQRLAARLGVVTGMHLAEVCNRQYPTVPRIILWLMVELAIIGSDMQEVIGCAIAFNLLSVGRIPLWGGVLITIIDTFVFLFLDKYGLRKLEAFFGFLITIMAVSFGYEYVMVRPDQGELLKGMFLPYCEGCGPAQMEQAVGIVGAVIMPHNIYLHSALVKSRSIDRGNKKEVKEANKYYFIESTIALFISFLINVFVVAVFAEAFYEKTNIEVNAMCNASDSPHTDLFPLDNSRLQVDIYKGGVVL…
AAD20725.1	AYLDPGNIESDLQSGAKAGFKLLWVLLGATIIGLLLQRLAARLGVVTGMHLAEVCNRQYPTVPRIILWLMVELAIIGSDMQEVIGCAIAFNLLSVGRIPLWGGVLITIIDTFVFLFLDKYGLRKLEAFFGFLITIMAVSFGYEYVMVRPDQGELLKGMFLPHCEGCGPAQMEQAVGIVGAVIMPHNIYLHSALVKSRSIDRGNKKEVKEANKYYFIESTIALFISFLINVFVVAVFAEAFYEKTNIEVNAMCNASDSPHTDLFPLDNSRLQVDIYKGGVVLGCFFGPVALYIWAIGILAAGQSSTMTGTYSGQFVMEGFLNLRWSRFARVLLTRSIAIFPTLLVAVFQDVQHLTGMNDFLNVLQSMQLPFALIPILTFTSLTSIMNDFANGLVWKIGGG…
XP_029538935.1	MKTAWEADQEEEPPQENGVIQTTQDQHSSISPPSSTVSGAPDDEPFSTYFEEKVAIPEDVTQMFSFRKLWAFTGPGFLMSIAYLDPGNIESDLQSGAKAGFKLLWVLLGATIIGLLLQRLAARLGVVTGMHLAEVCNRQYPTVPRIILWLMVELAIIGSDMQEVIGCAIAFNLLSVGRIPLWGGVLITIIDTFVFLFLDKYGLRKLEAFFGFLITIMAVSFGYEYVMVRPDQGELLKGMFLPYCEGCGPAQMEQAVGIVGAVIMPHNIYLHSALVKSRSIDRGNKKEVKEANKYYFIESTIALFISFLINVFVVAVFAEAFYEKTNIEVNAMCNASDSPHTDLFPLDNSRLQVDIYKGGVVLGCFFGPVALYIWAIGILAAGQSSTMTGTYSGQFVMEG…
XP_024231651.1	MKTAWEADQEEEPPQENGVIQTTQDQHSSISPPSTVSGAPDDEPFSTYFEEKVPIPEDVTQMFSFRKLWAFTGPGFLMSIAYLDPGNIESDLQSGAKAGFKLLWVLLGATIIGLLLQRLAARLGVVTGMHLAEVCNRQYPTVPRIILWLMVELAIIGSDMQEVIGCAIAFNLLSVGRIPLWGGVLITIIDTFVFLFLDKYGLRKLEAFFGFLITIMAVSFGYEYVMVRPDQGELLKGMFLPYCEGCGPAQMEQAVGIVGAVIMPHNIYLHSALVKSRSIDRGNKKEVKEANKYYFIESTIALFISFLINVFVVAVFAEAFYEKTNIEVNAMCNASDSPHTDLFPLDNSRLQVDIYKGGVVLGCFFGPVALYIWAIGILAAGQSSTMTGTYSGQFVMEGF…
XP_024231641.1	MKTAWEADQEEEPPQENGVIQTTQDQHSSISPPSTVSGAPDDEPFSTYFEEKVPIPEDVTQMFSFRKLWAFTGPGFLMSIAYLDPGNIESDLQSGAKAGFKLLWVLLGATIIGLLLQRLAARLGVVTGMHLAEVCNRQYPTVPRIILWLMVELAIIGSDMQEVIGCAIAFNLLSVGRIPLWGGVLITIIDTFVFLFLDKYGLRKLEAFFGFLITIMAVSFGYEYVMVRPDQGELLKGMFLPYCEGCGPAQMEQAVGIVGAVIMPHNIYLHSALVKSRSIDRGNKKEVKEANKYYFIESTIALFISFLINVFVVAVFAEAFYEKTNIEVNAMCNASDSPHTDLFPLDNSRLQVDIYKGGVVLGCFFGPVALYIWAIGILAAGQSSTMTGTYSGQFVMEGF…
XP_023852588.1	METEREADLLEEEPPQENGVIQSTQGLYSSTSTPASDDEPFSTYFEEKVPIPEDVTQMFSFRKLWAFTGPGFLMSIAYLDPGNIESDLQSGAKAGFKLLWVLLGATIIGLLLQRLAARLGVVTGMHLAEVCNRQYPTVPRIILWLMVELAIIGSDMQEVIGCAIAFNLLSMGRIPLWGGVLITIIDTFVFLFLDKYGLRKLEAFFGFLITIMAISFGYEYVMVRPDQGELLKGMFLPYCENCDSAQMEQAVGIVGAVIMPHNIYLHSALVKSRQIDRGNKKEVKEANKYYFIESTIALFISFLINVFVVAVFAEAFYDKTNIEVNAKCNASGSPHTDLFPLDNSTLQVDIFKGGVVLGCFFGPAALYIWAIGILAAGQSSTMTGTYSGQFVMEGFLNLR…
ABP48429.1	MKTAREADQEEEPPQENGIIQTTQDQHSSISPPSSTVSGAPDDEPFSTYFEEKVPIPEDVTQMFSLRKLWAFTGPGFLMSIAYLDPGNIESDLQSGAKAGFKLLWVLLGATIIGLLLQRLAARLGVVTGMHLAEVCNRQYPTVPRIILWLMVELAIIGSDMQEVIGCAIAFNLLSVGRIPLWGGVLITIIDTFVFLFLDKYGLRKLEAFFGFLITIMAVSFGYEYVMVRPDQGELLKGMFLPHCEGCGPAQMEQAVGIVGAVIMPHNIYLHSALVKSRSIDRGNKKEVKEANKYYFIESTIALFISFLINVFVVAVFAEAFYEKTNIEVNAMCNASDSPHTDLFPLDNSRLQVDIYKGGVVLGCFFGPVALYIWAIGILAAGQSSTMTGTYSGQFVMEG…
XP_021463901.1	METEREADLLEEEPPQENGVIQSTQGLYSSTSPPASDDEPFSTYFEEKVPIPEDVTQMFSFRKLWAFTGPGFLMSIAYLDPGNIESDLQSGAKAGFKLLWVLLGATIIGLLLQRLAARLGVVTGMHLAEVCNRQYPTVPRIILWLMVELAIIGSDMQEVIGCAIAFNLLSMGRIPLWGGVLITIIDTFVFLFLDKYGLRKLEAFFGFLITIMAVSFGYEYVMVRPDQGELLKGMFLPYCENCDSAQMEQAVGIVGAVIMPHNIYLHSALVKSRQIDRGNKKEVKEANKYYFIESTIALFISFLINVFVVAVFAEAFYDKTNIEVNAKCNASGSPHTDLFPLDNSTLQVDIFKGGVVLGCFFGPAALYIWAIGILAAGQSSTMTGTYSGQFVMEGFLNLR…
XP_029549604.1	METEREADLLEDEPPQENGVIQSTQGLYSSTSPPASDDEPFSTYFEEKVPIPEDVTQMFSFRKLWAFTGPGFLMSIAYLDPGNIESDLQSGAKAGFKLLWVLLGATIIGLLLQRLAARLGVVTGMHLAEVCNRQYPTVPRIILWLMVELAIIGSDMQEVIGCAIAFNLLSMGRIPLWGGVLITIIDTFVFLFLDKYGLRKLEAFFGLLITIMAVSFGYEYVMVRPDQGELLKGMFLPYCENCDSAQMEQAVGIVGAVIMPHNIYLHSALVKSRQIDRGNKKEVKEANKYYFIESTIALFISFLINVFVVAVFAEAFYDKTNIEVNAKCNASGSPHTDLFPLDNSTLQVDIFKGGVVLGCFFGPAALYIWAIGILAAGQSSTMTGTYSGQFVMEGFLNLR…
XP_010879449.1	MTEQEADVLEEESPQANGDIQNTQGQYRSISPPASPVAGTLDDEQFSTYFEEKIPIPDDVTKIFSFRKLWAFTGPGFLMSIAYLDPGNIESDLQSGAKAGFKLLWVLLVATIIGLLLQRLGARLGVVTGMHLAEVCHRQYPAVPRIILWFMVELAIIGSDMQEVIGCAIAFNLLSVGRIPLWGGVLITITDTFVFLFLDKYGLRKLELFFGFLITIMAISFGYEYVKVGPDQGELLKGMFLPYCQGCGTPQMEQAVGIVGAVIMPHNIYLHSALVKSRQIDRGNKKEVKEANKYYFIESTIALFVSFLINVFVVAVFAEAFYKKTNKEVNLQCNASGSPHTELFPMDDNPLEVDIYKGGVVLGCFFGSAALYIWAVGILAAGQSSTMTGTYSGQFVMEG…
XP_010879448.1	MSKPNQNEHSNLKESPQANGDIQNTQGQYRSISPPASPVAGTLDDEQFSTYFEEKIPIPDDVTKIFSFRKLWAFTGPGFLMSIAYLDPGNIESDLQSGAKAGFKLLWVLLVATIIGLLLQRLGARLGVVTGMHLAEVCHRQYPAVPRIILWFMVELAIIGSDMQEVIGCAIAFNLLSVGRIPLWGGVLITITDTFVFLFLDKYGLRKLELFFGFLITIMAISFGYEYVKVGPDQGELLKGMFLPYCQGCGTPQMEQAVGIVGAVIMPHNIYLHSALVKSRQIDRGNKKEVKEANKYYFIESTIALFVSFLINVFVVAVFAEAFYKKTNKEVNLQCNASGSPHTELFPMDDNPLEVDIYKGGVVLGCFFGSAALYIWAVGILAAGQSSTMTGTYSGQFVM…
XP_010879451.1	MDNPEESPQANGDIQNTQGQYRSISPPASPVAGTLDDEQFSTYFEEKIPIPDDVTKIFSFRKLWAFTGPGFLMSIAYLDPGNIESDLQSGAKAGFKLLWVLLVATIIGLLLQRLGARLGVVTGMHLAEVCHRQYPAVPRIILWFMVELAIIGSDMQEVIGCAIAFNLLSVGRIPLWGGVLITITDTFVFLFLDKYGLRKLELFFGFLITIMAISFGYEYVKVGPDQGELLKGMFLPYCQGCGTPQMEQAVGIVGAVIMPHNIYLHSALVKSRQIDRGNKKEVKEANKYYFIESTIALFVSFLINVFVVAVFAEAFYKKTNKEVNLQCNASGSPHTELFPMDDNPLEVDIYKGGVVLGCFFGSAALYIWAVGILAAGQSSTMTGTYSGQFVMEGFLNLRW…
XP_011612411.1	MKPEQDGDLLDGSHQENGVQTNQYSSISPPGSPVGQEEPFSTYFEEKVPIPENTSEVFSFRKLWAFTGPGFLMSIAYLDPGNIESDLQSGAKAGFKLLWVLLGATIIGLLLQRLAARLGVVTGMHLAEVCHRQYPTVPRIILWLMVELAIIGSDMQEVIGCAIAFNLLSAGRIPLYAGVLITITDTFVFLFLDKYGLRKLEAFFGFLITVMAISFGYEYVVVKPNQGELLKGMFLPYCEGCGPNELEQAVGIVGAVIMPHNIYLHSALVKSRDINRNNKKEVKEANKYYFIESSVALFISFLVNVFVVAVFAQAFYQKTNDKVHEFCNITSGPYANLFPNNNDTLQVDIYKGGVVLGCFFGPAALYIWAIGVLAAGQSSTMTGTYSGQFVMEGFLDLHW…
XP_003973524.1	MKPEQDGDLLDGGSHQENGVQTNQYSSISPPGSPVGQEEPFSTYFEEKVPIPENTSEVFSFRKLWAFTGPGFLMSIAYLDPGNIESDLQSGAKAGFKLLWVLLGATIIGLLLQRLAARLGVVTGMHLAEVCHRQYPTVPRIILWLMVELAIIGSDMQEVIGCAIAFNLLSAGRIPLYAGVLITITDTFVFLFLDKYGLRKLEAFFGFLITVMAISFGYEYVVVKPNQGELLKGMFLPYCEGCGPNELEQAVGIVGAVIMPHNIYLHSALVKSRDINRNNKKEVKEANKYYFIESSVALFISFLVNVFVVAVFAQAFYQKTNDKVHEFCNITSGPYANLFPNNNDTLQVDIYKGGVVLGCFFGPAALYIWAIGVLAAGQSSTMTGTYSGQFVMEGFLDLH…
XP_029682171.1	MKEGPRESSELRGSHQENGVQTNQYSSISPPGSPVGQEEPFSTYFEEKVPIPENTSEVFSFRKLWAFTGPGFLMSIAYLDPGNIESDLQSGAKAGFKLLWVLLGATIIGLLLQRLAARLGVVTGMHLAEVCHRQYPTVPRIILWLMVELAIIGSDMQEVIGCAIAFNLLSAGRIPLYAGVLITITDTFVFLFLDKYGLRKLEAFFGFLITVMAISFGYEYVVVKPNQGELLKGMFLPYCEGCGPNELEQAVGIVGAVIMPHNIYLHSALVKSRDINRNNKKEVKEANKYYFIESSVALFISFLVNVFVVAVFAQAFYQKTNDKVHEFCNITSGPYANLFPNNNDTLQVDIYKGGVVLGCFFGPAALYIWAIGVLAAGQSSTMTGTYSGQFVMEGFLDLH…
XP_029682173.1	MKEGPRESSELSSHQENGVQTNQYSSISPPGSPVGQEEPFSTYFEEKVPIPENTSEVFSFRKLWAFTGPGFLMSIAYLDPGNIESDLQSGAKAGFKLLWVLLGATIIGLLLQRLAARLGVVTGMHLAEVCHRQYPTVPRIILWLMVELAIIGSDMQEVIGCAIAFNLLSAGRIPLYAGVLITITDTFVFLFLDKYGLRKLEAFFGFLITVMAISFGYEYVVVKPNQGELLKGMFLPYCEGCGPNELEQAVGIVGAVIMPHNIYLHSALVKSRDINRNNKKEVKEANKYYFIESSVALFISFLVNVFVVAVFAQAFYQKTNDKVHEFCNITSGPYANLFPNNNDTLQVDIYKGGVVLGCFFGPAALYIWAIGVLAAGQSSTMTGTYSGQFVMEGFLDLHW…
TNM88627.1	MQEQADIYPAGSEISQLDLMKPEQDGDLLDGGSHQENGVQTNQYSSISPPGSPVGQEEPFSTYFEEKVPIPENTSEVFSFRKLWAFTGPGFLMSIAYLDPGNIESDLQSGAKAGFKLLWVLLGATIIGLLLQRLAARLGVVTGMHLAEVCHRQYPTVPRIILWLMVELAIIGSDMQEVIGCAIAFNLLSAGRIPLYAGVLITITDTFVFLFLDKYGLRKLEAFFGFLITVMAISFGYEYVVVKPNQGELLKGMFLPYCEGCGPNELEQAVGIVGAVIMPHNIYLHSALVKSRDINRNNKKEVKEANKYYFIESSVALFVSFLVNVFVVAVFAQAFYQKTNDKVHEFCNITSGPYADLFPNNNDTLQVDIYKGGVVLGCFFGPAALYIWAIGVLAAGQSS…
CAD43051.1	MKPEQDGDLLDGGSHQENGVQTNQYSSISPPGSPVGQEEPFSTYFEEKVPIPENTSEVFSFRKLWAFTGPGFLMSIAYLDPGNIESDLQSGAKAGFKLLWVLLGATIIGLLLQRLAARLGVVTGMHLAEVCHRQYPTVPRIILWLMVELAIIGSDMQEVIGCAIAFNLLSAGRIPLYAGVLITITDTFVFLFLDKYGLRKLEAFFGFLITVMAISFGYEYVVVKPNQGELLKGMFLPYCEGCGPNELEQAVGIVGAVIMPHNIYLHSALVKSRDINRNNKKEVKEANKYYFIESSVALFISFLVNVFVVAVFAQAFYQKTNDKVHEFCNITSGPYANLFPNNNDTLQVDIYKGGVVLGCFFGPAALYIWAIGVLAAGQSSTMTGTYSGQFVMEGFLDLH…
TWW61820.1	MKPEQDGDLLDGGSHQENGVQTNQYSSISPPGSPVGQEEPFSTYFEEKVPIPENTSEVFSFRKLWAFTGPGFLMSIAYLDPGNIESDLQSGAKAGFKLLWVLLGATIIGLLLQRLAARLGVVTGMHLAEVCHRQYPTVPRIILWLMVELAIIGSDMQEVIGCAIAFNLLSAGSIPLYAGVLITITDTFVFLFLDKYGLRKLEAFFGFLITVMAISFGYEYVVVKPNQGELLKGMFLPYCEGCGPNELEQAVGIVGAVIMPHNIYLHSALVKSRDINRNNKKEVKEANKYYFIESSVALFVSFLVNVFVVAVFAQAFYQKTNDKVHEFCNITSGPYAHLFPNNNDTLQVDIYKGGVVLGCFFGPAALYIWAIGVLAAGQSSTMTGTYSGQFVMEGFLDLH…
XP_015253383.1	MTGGKEGRSRLYDSQQENGDQSSHYGAISPQASSEVQEEPLSTYFEDKVPIPESDNECFSFRKLWAFTGPGFLMSIAYLDPGNIESDLQSGATSDFKLLWVLLYATIIGLLLQRLAARLGVVTGMDLAEICNRQYPTVPRMILWLMIELAIIGSDMQEVIGCAIAFNLLSVGRIPLWGGVLITIADTFVFLFLDKYGLRKLELFFGFLITVMAISFGYEYGLVKPDQGEVLKGMFLPYCPNCGPVQLEQAVGIVGAVIMPHNIYLHSALVKSREVDRKNKKEIKEANKYFFIESSIALLVSFVINLFVVAVFAQAFYNKNNMEVNAVCNATGSPHTDLFPLNNGTLEVDIYKGGVVLGCFFGPAALYIWAIGILAAGQSSTMTGTYSGQFVMEGFLNLK…
XP_007248455.2	MEAFQMSDSSPQQNGVVQSSPTHYSTIAASPSSQEEPISTYFEEKIPIPDDATQIFSFRKLWAFTGPGFLMSIAYLDPGNIESDLQSGAKAGFKLLWVLLASTIIGLLLQRLAARLGVVTGMHLAEVCNRQYPTVPRIILWLMVELAIIGSDMQEVIGCAIAFNLLSVGRIPLWAGVLITIIDTFVFLFLDKYGLRKLEAFFGILITIMALSFGYEYVMVAPNQVEVLKGMFVPYCEGCGPVQLEQAVGVVGAVIMPHNIYLHSALVKSRQVDRNNKKEVKEANKYYFIESSIALFVSFLINVFVVAVFAEAFYDKTNIQVNQQCNESGSPHTDLFPTNNETLQVDIYKGGVVLGCFFGPAALYIWAIGILAAGQSSTMTGTYSGQFVMEGFLNLRWSR…
XP_007248454.2	MKTHQDSDLLEDSSPQQNGVVQSSPTHYSTIAASPSSQEEPISTYFEEKIPIPDDATQIFSFRKLWAFTGPGFLMSIAYLDPGNIESDLQSGAKAGFKLLWVLLASTIIGLLLQRLAARLGVVTGMHLAEVCNRQYPTVPRIILWLMVELAIIGSDMQEVIGCAIAFNLLSVGRIPLWAGVLITIIDTFVFLFLDKYGLRKLEAFFGILITIMALSFGYEYVMVAPNQVEVLKGMFVPYCEGCGPVQLEQAVGVVGAVIMPHNIYLHSALVKSRQVDRNNKKEVKEANKYYFIESSIALFVSFLINVFVVAVFAEAFYDKTNIQVNQQCNESGSPHTDLFPTNNETLQVDIYKGGVVLGCFFGPAALYIWAIGILAAGQSSTMTGTYSGQFVMEGFLNL…
XP_022538345.1	MKTHQDSDLLEDSSPQQNGVVQSSPTHYSTIAASPSSQEEPISTYFEEKIPIPDDATQIFSFRKLWAFTGPGFLMSIAYLDPGNIESDLQSGAKAGFKLLWVLLASTIIGLLLQRLAARLGVVTGMHLAEVCNRQYPTVPRIILWLMVELAIIGSDMQEVIGCAIAFNLLSVGRIPLWAGVLITIIDTFVFLFLDKYGLRKLEAFFGILITIMALSFGYEYVMVAPNQVEVLKGMFVPYCEGCGPVQLEQAVGVVGAVIMPHNIYLHSALVKSRQVDRNNKKEVKEANKYYFIESSIALFVSFLINVFVVAVFAEAFYDKTNIQVNQQCNESGSPHTDLFPTNNETLQVDIYKGGVVLGCFFGPAALYIWAIGILAAGQSSTMTGTYSGQFVMEGFLNL…
XP_017548284.1	MKTNQESDLLEESPPQQNGVAQTSPTHYSSITPPAPEEEPISTYFEEKIPVPEDVTQVFSFRKLWAFTGPGFLMSIAYLDPGNIESDLQSGAKAGFKLLWVLLGATIIGLLLQRLAARLGVVTGMHLAEVCNRQYPTVPRIILWLMVELAIIGSDMQEVIGCAIAFNLLSVGRIPLWAGVLITIIDTFVFLFLDKYGLRKLEAFFGFLITIMALSFGYEYVRVAPNQGEVLKGMFVPYCEGCGPVQLEQAVGIVGAVIMPHNIYLHSALVKSRQVDRASKKEVKEANKYYFIESSIALFISFLINVFVVAVFAEAFYDKTNMEVNQQCNETGSPHTDLFPLNNETLQVDIYKGGVVLGCFFGPAALYIWAIGILAAGQSSTMTGTYSGQFVMEGFLNLR…
XP_026857764.1	MTTNHESDLLEERSPQQNGVTETDSREEQISTYFDEKIPVPENVTQVFSFRKLWAFTGPGFLMSIAYLDPGNIESDLQSGAKAGFKLLWVLLGATIIGLLLQRLAARLGVVTGMHLAEVCNRQYPTVPRIILWLMVEFAIIGSDMQEVIGCAIAFNLLSVGRIPLWAGVLITIIDTFVFLFLDKYGLRKLEAFFGFLITIMALSFGYEYVQVAPDQAEVLKGMFVPYCKGCGPVQLEQAVGIVGAVIMPHNIYLHSALVKSRDIDRHNKKEVKEANKYFFIESSVALFVSFLINVFVVAVFAEAFYGKTNMEVNQQCNKTGSAHTDLFPLNNETLQVDIYKGGVVLGCFFGPAALYIWAIGILAAGQSSTMTGTYSGQFVMEGFLNLRWSRFARVLLTR…
XP_012680381.1	MKTEREPDLEEEDPSQENGVIQTQYSAISPPASPVAQDEPFSTYFEERVPIPDDADQFFSFRKLWAFTGPGFLMSIAYLDPGNIESDLQSGAKAGFKLLWVLLGATIIGLLLQRLAARLGVVTGMHLAEVCNRQYPTVPRIILWLMVELAIIGSDMQEVIGCAIAFNLLSVGRIPLWAGVLITIIDTFVFLFLDKYGLRKLEAFFGTLITVMAISFGYEYVMVAPNQGELLKGMFLPYCAGCGPPQLEQAVGIVGAVIMPHNIYLHSALVKSRDVDRNNKKEVKEANKYFFIESTVALFLSFLINVFVVAVFAQAFYGKTNNEVSLKCNETGSPHTDLFPSNNDTLVVDIYKGGVVLGCFFGPAALYIWAIGILAAGQSSTMTGTYSGQFVMEGFLNLS…
XP_020448431.1	MKGEKNERSKLISPPEENGVHTNKFSAISPPASPVAENDEFSTYFEDKVPIPEDVNQVFSFRKLWAFTGPGFLMSIAYLDPGNIESDLQSGAVAGFKLLWVLLVATIIGLLLQRLAARLGVVTGLHLADVCYSQYRXFPRIILWLMIELAIIGSDMQEVIGCAIALNLLSMGRIPLWGGVLITITDTFVFLFLDKYGLRKLEAFFGFLITVMALSFGYEYVLVNPNQGDVLKGMFMPYCAGCGPAQLQQAVGIVGAVIMPHNIYLHSALVKSREIDRKNKKAIKEANKYYFIESSLALFVSFLINVFVVAVFAQAFYNKTNIEVNSECNATGSPHTDLFPLNNDTLQVDIYKGGVVLGCFFGQAALYIWAIGILAAGQSSTMTGTYSGQFVMEGFLNLR…
XP_028853647.1	MKTDQDPDLLEEDPPQENGAIQTNQYSAISPPGSPDAQEEPFSTYFEEKIPVPDDVTQIFSFRKLWAFTGPGFLMSIAYLDPGNIESDLQSGAKAGFKLLWVLLVATVIGLLLQRLAARLGVVTGMHLAEMCHRQYPTVPRIILWMMVELAIIGSDMQEVIGCAIAFNLLSVGRIPLWAGVLITIIDTFVFLFLDKYGLRKLEAFFGFLITIMAISFGYEYIMVAPNQGEVLKGMFVPYCEGCGPVQMEQAVGIVGAVIMPHNIYLHSALVKSRQVDRGNKKEVKEANKYFFIESAVALFVSFLINVFVVAVFAEAFYNKTNMQVSDQCNSTGSPHRDLFPADNSTLQVDIYKGGVVLGCFFGPAALYIWAIGILAAGQSSTMTGTYSGQFVMEGFLNL…
XP_028853645.1	MKTDQDPDLLEEDPPQENGAIQTNQYSAISPPGSPDAQEEPFSTYFEEKIPVPDDVTQIFSFRKLWAFTGPGFLMSIAYLDPGNIESDLQSGAKAGFKLLWVLLVATVIGLLLQRLAARLGVVTGMHLAEMCHRQYPTVPRIILWMMVELAIIGSDMQEVIGCAIAFNLLSVGRIPLWAGVLITIIDTFVFLFLDKYGLRKLEAFFGFLITIMAISFGYEYIMVAPNQGEVLKGMFVPYCEGCGPVQMEQAVGIVGAVIMPHNIYLHSALVKSRQVDRGNKKEVKEANKYFFIESAVALFVSFLINVFVVAVFAEAFYNKTNMQVSDQCNSTGSPHRDLFPADNSTLQVDIYKGGVVLGCFFGPAALYIWAIGILAAGQSSTMTGTYSGQFVMEGFLNL…
XP_017351938.1	MRRNKDSNCVEELSPDHNGVIQTIYSSISPSEEQSNISTYFEEKVPVPEDVTQVFSFRKLWAFTGPGFLMSIAYLDPGNIESDLQSGAVAGFKLLWVLLGATIIGLLLQRLAARLGVVTGMHLAEVCHRQYPTVPRIILWLMVELAIIGSDMQEVIGCAIAFNLLSVGRIPLWAGVLITIVDTFVFLFLDKYGLRKLEAFFGFLITIMAVTFGYQYVRVAPDQGAVLKGLFVPYCQGCGPVQLEQAVGIVGAVIMPHNIYLHSALVKSRQVDRANKREVKEANKYFFIESCIALFISFLINVFVVAVFAEAFYNKTNMEVNQQCNETGSIHSNLFPLNNNTLQVDIYKGGVVLGCFFGPAALYIWAVGILAAGQSSTMTGTYSGQFVMEGFLNLRWSRF…
NP_001187029.1	MRRNKDSNCVEELSPDHNGVIQTIYSSISPSEEQSNISTYFEEKVPVPEDVTQVFSFRKLWAFTGPGFLMSIAYLDPGNIESDLQSGAVAGFKLLWVLLGATIIGLLLQRLAARLGVVTGMHLAEVCHRQYPTVPRIILWLMVELAIIGSDMQEVIGCAIAFNLLSVGRIPLWAGVLITIVDTFVFLFLDKYGLRKLEAFFGFLITIMAVTFGYQYVRVAPDQGAVLKGLFVPYCQGCGPVQLEQAVGIVGAVIMPHNIYLHSALVKSRQVDRANKREVKEANKYFFIESCIALFISFLINVFVVAVFAEAFYNKTNMEVNQQCNETGSIHSNLFPLNNNTLQVDIYKGGVVLGCFFGPAALYIWAVGILAAGQSSTMTGTYSGQFVMEGFLNLRWSRF…
XP_026996505.1	MNRNRDSDSVEELTPDQNGGIQTIYSSISPSEEPNTSTYFDEKVPVPDDVTQVFSFRKLWAFTGPGFLMSIAYLDPGNIESDLQSGAVAGFKLLWILLGATIIGLLLQRLAARLGVVTGMHLAEVCHRQYPTIPRIILWLMVELAIIGSDMQEVIGCAIAFNLLSMGRIPLWAGVLITIIDTFVFLFLDKYGLRKLEAFFGFLITIMAVTFGYEYVRVAPDQGELLKGMFVPYCQGCGAAQLEQAVGIVGAVIMPHNIYLHSALVKSRDVNRANKREVKEANKYFFIESCVALFVSFLINVFVVAVFAESFYNKTNMEVNEQCNQTGSVHTDLFPLNNNTLQVDIYKGGVVLGCFFGPAALYIWAVGILAAGQSSTMTGTYSGQFVMEGFLNLRWSRFA…
AVQ09316.1	MNRNRDSDSVEELTPDQNGGIQTIYSSISPSEEPNTSTYFDEKVPVPDDVTQVFSFRKLWAFTGPGFLMSIAYLDPGNIESDLQSGAVAGFKLLWILLGATIIGLLLQRLAARLGVVTGMHLAEVCHRQYPTIPRIILWLMVELAIIGSDMQEVIGCAIAFNLLSMGRIPLWAGVLITIIDTFVFLFLDKYGLRKLEAFFGFLITIMAVTFGYEYVRVAPDQGELLKGMFVPYCQGCGAAQLEQAVGIVGAVIMPHNIYLHSALVKSRDVNRANKREVKEANKYFFIESCVALFVSFLINVFVVAVFAESFYNKTNMEVNEQCNQTGSVHTDLFPLNNNTLQVDIYKGGVVLGCFFGPAALYIWAVGILAAGQSSTMTGTYSGQFVMEGFLNLRWSRFA…
KAB5515293.1	MKQNKDSDSVEEGSSIPDDVTQVFSFRKLWAFTGPGFLMSIAYLDPGNIESDLQSGAVAGFKLLWVLLGATIIGLLLQRLAARLGVVTGMHLAEVCHRQYPTVPRIILWLMVELAIIGSDMQEVIGCAIALNLLSVGRIPLWAGVLITIVDTFVFLFLDKYGLRKLEAFFGFLITVMAVTFGYEYVLQLAEECAQLEQAVGIVGAVIMPHNIYLHSALVKSRQVDRANKREVKEANKYFFIESCIALFISFLINVFVVAVFAEAFYNKTNMEVNQQCNQTGSVHTDLFPLNNNTLQVDIYKGGVVLGCFFGPAALYIWAVGILAAGQSSTMTGTYSGQFVMEGFLNLRWSRFARVLLTRSIAIFPTLLVAIFQDVTRLTGMNDFLNVLQSMQLPFALIP…
XP_030231639.1	MKENQEGDLLEDDFPQNNGEVSAGQYSTVSPPGSPTDQEEPFSTYFAEKVAIPEDANQTFSFRKLWAFTGPGFLMSIAYLDPGNIESDLQSGAKAGFKLLWVLLGATIIGLLLQRLAARLGVVTGMHLAEVCNRQYPTVPRIILWLMVELAIIGSDMQEVIGCAIAFHLLSVGRIPLWAGVLITIVDTFVFLFLDKYGLRKLEAFFGVLITIMAISFGYEYVLVKPDQLEVMKGMFIPYCKDCGTIQLEQAVGIVGAVIMPHNIYLHSALVKSRQIDRSNKNEVKEANKYYFIEATIALFISFLINVFVVAVFAQAFYNKTNMEVNLACNGSSFPYDNLFPHDNRTLEVDIYKGGVVLGCFFGPVALYIWAVGILAAGQSSTMTGTYSGQFVMEGFLNL…
XP_030231643.1	MKENQEGDLLEDDFPQNNGEVSAGQYSTVSPPGSPTDQEEPFSTYFAEKVAIPEDANQTFSFRKLWAFTGPGFLMSIAYLDPGNIESDLQSGAKAGFKLLWVLLGATIIGLLLQRLAARLGVVTGMHLAEVCNRQYPTVPRIILWLMVELAIIGSDMQEVIGCAIAFHLLSVGRIPLWAGVLITIVDTFVFLFLDKYGLRKLEAFFGVLITIMAISFGYEYVLVKPDQLEVMKGMFIPYCKDCGTIQLEQAVGIVGAVIMPHNIYLHSALVKSRQIDRSNKNEVKEANKYYFIEATIALFISFLINVFVVAVFAQAFYNKTNMEVNLACNGSSFPYDNLFPHDNRTLEVDIYKGGVVLGCFFGPVALYIWAVGILAAGQSSTMTGTYSGQFVMEGFLNL…
XP_030231642.1	MKENQEGDLLEDDFPQNNGEVSAGQYSTVSPPGSPTDQEEPFSTYFAEKVAIPEDANQTFSFRKLWAFTGPGFLMSIAYLDPGNIESDLQSGAKAGFKLLWVLLGATIIGLLLQRLAARLGVVTGMHLAEVCNRQYPTVPRIILWLMVELAIIGSDMQEVIGCAIAFHLLSVGRIPLWAGVLITIVDTFVFLFLDKYGLRKLEAFFGVLITIMAISFGYEYVLVKPDQLEVMKGMFIPYCKDCGTIQLEQAVGIVGAVIMPHNIYLHSALVKSRQIDRSNKNEVKEANKYYFIEATIALFISFLINVFVVAVFAQAFYNKTNMEVNLACNGSSFPYDNLFPHDNRTLEVDIYKGGVVLGCFFGPVALYIWAVGILAAGQSSTMTGTYSGQFVMEGFLNL…
XP_016317848.1	MKTERDGDGVLEESSSQEPELYSPASPGPQQEPISTYFEEKVPIPEDDMTKLFSFRKLWAFTGPGFLMSIAYLDPGNIESDLQSGARAGFKLLWVLLGATIIGLLLQRLAARLGVVTGMHLAEVCNRHYPTVPRIILWLMVELAIIGSDMQEVIGCAIALNLLSVGRIPLWAGVLITIIDTFVFLFLDKYGLRKLEAFFGFLITIMALSFGYEYVRVAPDQAEVLKGMFVPYCSGCGPTQLEQAVGIVGAVIMPHNIYLHSALVKSRDINRANKKEVKEANKYYFIESSIALFISFLINVFVVAVFAEAFYGKTNMEVSLQCNETGSAHSELFPANNETLEVDIYKGGVVLGCFFGPAALYIWAIGILAAGQSSTMTGTYSGQFVMEGFLNLRWSRFAR…
XP_016101768.1	MKTERDGDGVLEESSSQEPELYSPASPGPQQEPISTYFEEKVPIPEDDMTKLFSFRKLWAFTGPGFLMSIAYLDPGNIESDLQSGARAGFKLLWVLLGATIIGLLLQRLAARLGVVTGMHLAEVCNRHYPTVPRIILWLMVELAIIGSDMQEVIGCAIALNLLSVGRIPLWAGVLITIIDTFVFLFLDKYGLRKLEAFFGFLITIMALSFGYEYVRVAPDQAEVLKGMFLPYCSGCGPTQLEQAVGIVGAVIMPHNIYLHSALVKSRDINRANKKEVKEANKYYFIESSIALFISFLINVFVVAVFAEAFYGKTNMEVSLQCNETGSAHSKLFPANNETLEVDIYKGGVVLGCFFGPAALYIWAIGILAAGQSSTMTGTYSGQFVMEGFLNLRWSRFAR…
XP_016417932.1	MKTERDGDGVLEESSSQEPELYSPASPGPQQEPISTYFEEKVPIPEDDMTKLFSFRKLWAFTGPGFLMSIAYLDPGNIESDLQSGARAGFKLLWVLLGATIIGLLLQRLAARLGVVTGMHLAEVCNRHYPTVPRIILWLMVELAIIGSDMQEVIGCAIALNLLSVGRIPLWAGVLITIIDTFVFLFLDKYGLRKLEAFFGFLITIMALSFGYEYVRVAPDQAEVLKGMFVPYCSGCGPTQLEQAVGIVGAVIMPHNIYLHSALVKSRDINRANKKEVKEANKYYFIESSIALFISFLINVFVVAVFAEAFYGKTNMEVSLQCNETGSAHSELFPANNETLEVDIYKGGVVLGCFFGPAALYIWAIGILAAGQSSTMTGTYSGQFVMEGFLNLRWSRFAR…
CAB60196.1	MKTERDGNAALEESSSQEPELYSPASPGPQREPISTYFEEKVPIPEDDLTKLFSFRKLWAFTGPGFLMSIAYLDPGNIESDLQSGARAGFKLLWVLLGATIIGLLLQRLAARLGVVTGMHLAEVCNRHYPTVPRIILWLMVELAIIGSDMQEVIGSAIALNLLSVGRIPLWAGVLITIIDTFVFLFLDKYGLRKLEAFFGFLITIMALSFGYEYVRVAPNQGEVLKGMFVPYCSGCGPTQLEQAVGVVGAVIMPHNIYLHSALVKSRDINRENKKEVKEANKYYFIESSIALFVSFLINVFVVAVFAEAFYGRTNMEVSLQCNETGSAHSELFPANNETLEVDIYKGGVVLGCFFGPAALYIWAIGILAAGQSSTMTGTYSGQFVMEGFLNLRWSRFAR…
XP_026096603.1	MKTEQDGAGALEESGSQGPELYSAASPGPQQEPISTYFEEKVPIPEDDMTKLFSFRKLWAFTGPGFLMSIAYLDPGNIESDLQSGARAGFKLLWVLLGATIIGLLLQRLAARLGVVTGMHLAEVCNRHYPTVPRIILWLMVELAIIGSDMQEVIGCAIALNLLSVGRIPLWAGVLITIIDTFVFLFLDKYGLRKLEAFFGFLITIMALSFGYEYVRVAPDQGEVLKGMFVPYCSGCGPTQLEQAVGVVGAVIMPHNIYLHSALVKSRDINRSNKKEVKEANKYYFIESSIALFVSFLINVFVVAVFAEAFYGKTNMEVSLQCNETGSAHSELFPANNETLEVDIYKGGVVLGCFFGPAALYIWAIGILAAGQSSTMTGTYSGQFVMEGFLNLRWSRFAR…
AGU16536.1	MKTEQDGAGALEESGSQGPELYSAASPGPQQEPISTYFEEKVPIPEDDMTKLFSFRKLWAFTGPGFLMSIAYLDPGNIESDLQSGARAGFKLLWVLLGATIIGLLLQRLAARLGVVTGMHLAEVCNRHYPTVPRIILWLMVELAIIGSDMQEVIGCAIALNLLSVGRIPLWAGVLITIIDTFVFLFLDKYGLRKLEAFFGFLITIMALSFGYEYVRVAPDQGEVLKGMFVPYCSGCGPTQLEQAVGVVGAVIMPHNIYLHSALVKSRDINRSNKKEVKEANKYYFIESTIALFVSFLINVFVVAVFAEAFYGKTNMEVSLQCNETGSAHSELFPANNETLEVDIYKGGVVLGCFFGPAALYIWAIGILAAGQSSTMTGTYSGQFVMEGFLNLRWSRFAR…
KTG00831.1	MKTERDGNAALEESSSQEPELYSPASPGPQREPISTYFEEKVPIPEDDLTKLFSFRKLWAFTGPGFLMSIAYLDPGNIESDLQSGARAGFKLLWVLLGATIIGLLLQRLAARLGVVTGMHLAEVCNRHYPTEVIGSAIALNLLSVGRIPLWAGVLITIIDTFVFLFLDKYGLRKLEAFFGFLITIMALSFGYEYVRVAPNQGEVLKGMFVPYCSGCGPTQLEQAVGVVGAVIMPHNIYLHSALVKSRDINRENKKEVKEANKYYFIESSIALFVSFLINVFVVAVFAEAFYGRTNMEVSLQCNETGSAHSELFPANNETLEVDIYKGGVVLGCFFGPAALYIWAIGILAAGQSSTMTGTYSGQFVMEGFLNLRWSRFARVLLTRSIAIFPTLLVAVFQD…
RXN31946.1	MFKNRLTETLVELMKTERDGDAVLEEDSPQEHDLYSPASPGPQPEPISTYFEEKVPIPEEDVTKLFSFRKLWAFTGPGFLMSIAYLDPGNIESDLQSGAKAGFKLLWVLLGATIIGLLLQRLAARLGVVTGMHLAEVCNRHYPTVPRIILWLMVELAIIGSDMQEVIGCAIALNLLSVGRIPLWAGVLITIIDTFVFLFLDKYGLRKLEAFFGFLITIMALSFGFEYVRVAPNQGEVLKGMFVPYCSGCGPTQLEQAVGIVGAVIMPHNIYLHSALVKSRDINRANKKEVKEANKYYFIESSIALFVSFLINVFVVAVFAEAFYGRTNMEVSQQCNETGSPHSDLFPADNNTLEVDIYKGGVVLGCFFGPAALYIWAIGILAAGQSSTMTGTYSGQFVM…
XP_016328506.1	MKTERDEDAAQEERSPQEPDFYSPVSPDPQEPVSTYFEEKVPIPDDDGTKLFSFRKLWAFTGPGFLMSIAYLDPGNIESDLQSGAIAGFKLLWVLLVSTIIGLLLQRLAARLGVVTGMHLAEVCHRHYPMVPRIILWLMVELAIIGSDMQEVIGCAIALNLLSVGRIPLWAGVLITIIDTFVFLFLDKYGLRKLEAFFGFLITIMALSFGYEYVRVAPDQAAVLKGMFVPYCSGCGPAQLEQAVGIVGAVIMPHNIYLHSALVKSRDINRANKKEVKEANKYYFIESSIALFISFLINVFVVAVFAEAFYGKTNMEVGQKCNETGSPHSKLFPANNETLEVDIYKGGVVLGCFFGPAALYIWAIGILAAGQSSTMTGTYSGQFVMEGFLNLRWSRFARV…
NP_001035460.1	MKTGRDGDALDESVPQEPDLYSPVSPVPQEEPVSTYFEEKVPIPDDGTEKLFSFRKLWAFTGPGFLMSIAYLDPGNIESDLQSGAKAGFKLLWVLLGATIIGLLLQRLAARLGVVTGMHLAEVCNRHYPTVPRIILWLMVELAIIGSDMQEVIGCAIALNLLSVGRIPLWAGVLITIVDTFVFLFLDKYGLRKLEAFFGFLITIMALSFGYEYVRVAPDQAAVLQGMFLPYCRGCGPSQLEQAVGIVGAVIMPHNIYLHSALVKSRDINRSNKKEVKEANKYYFIESSIALFVSFLINVFVVAVFAEAFYGKTNMEVSQQCNETGSPHTDLFPANNETLEVDIYKGGVVLGCFFGPAALYIWAVGILAAGQSSTMTGTYSGQFVMEGFLNLRWSRFARV…
AAO16988.1	MKTGRDGDALDESVPQEPDLYSPVSPVPQEEPVSTYFEEKVPIPDDGTEKLFSFRKLWAFTGPGFLMSIAYLDPGNIESDLQSGAKAGFKLLWVLLGATIIGLLLQRLAARLGVVTGMHLAEVCNRHYPTVPRIILWLMVELAIIGSDMQEVIGCAIALNLLSVGRIPLWAGVLITIVDTFVFLFLDKYGLRKLEAFFGFLITIMALSFGYEYVRVAPDQAAVLQGMFLPYCRGCGPSQLEQAVGIVGAVIMPHNIYLHSALVKSRDINRSNKKEVKEANKYYFIESSIALFVSFLINVFVVAVFAEAFYGKTNMEVSQQCNETGSPHTDLFPANNETLEVDIYKGGVVLGCFFGPAALYIWAVGILAAGQSSTMTGTYSGQFVMEGFLNLRWSRFARV…
AAI62506.1	MKTGRDGDALDESVPQEPDLYSPVSPVPQEEPVSTYFEEKVPIPDDGTEKLFSFRKLWAFTGPGFLMSIAYLDPGNIESDLQSGAKAGFKLLWVLLGATIIGLLLQRLAARLGVVTGMHLAEVCNRHYPTVPRIILWLMVELAIIGSDMQEVIGCAIALNLLSVGRIPLWAGVLITIVDTFVFLFLDKYGLRKLEAFFGFLITIMALSFGYEYVRVAPDQAAVLQGMFLPYCRGCGPSQLEQAVGIVGAVIMPHNIYLHSALVKSRDINRSNKKEVKEANKYYFIESSIALFVSFLINVFVVAVFAEAFYGKTNMEVSQQCNETGSPHTDLFPANNETLEVDIYKGGVVLGCFFGPAALYIWAVGILAAGQSSTMTGTYSGQFVMEGFLNLRWSRFARV…
XP_016328510.1	MKTERDEDAAQEERSPQEPDFYSPVSPDPQEPVSTYFEEKVPIPDDDGTKLFSFRKLWAFTGPGFLMSIAYLDPGNIESDLQSGAIAGFKLLWVLLVSTIIGLLLQRLAARLGVVTGMHLAEVCHRHYPMVPRIILWLMVELAIIGSDMQEVIGCAIALNLLSVGRIPLWAGVLITIIDTFVFLFLDKYGLRKLEAFFGFLITIMALSFGYEYVRVAPDQAAVLKGMFVPYCSGCGPAQLEQAVGIVGAVIMPHNIYLHSALVKSRDINRANKKEVKEANKYYFIESSIALFISFLINVFVVAVFAEAFYGKTNMEVGQKCNETGSPHSKLFPANNETLEVDIYKGGVVLGCFFGPAALYIWAIGILAAGQSSTMTGTYSGQFVMEGFLNLRWSRFARV…
AII00954.1	MKTERDGDVLEESQREPDLYSPVSPQDQPVSTYFEEKVPIPDDDAAKMFSFRKLWAFTGPGFLMSIAYLDPGNIESDLQSGAKAGFKLLWVLLASTIIGLLLQRLAARLGVVTGMHLAEVCNRHYPTVPRIILWLMVELAIIGSDMQEVIGCAIALNLLSVGRIPLWAGVLITIIDTFVFLFLDKYGLRKLEAFFGFLITVMALSFGFEYVRVAPDQGEVLKGMFLPYCQGCGPTQLEQAVGIVGAVIMPHNIYLHSALVKSRDIDRGNKREVKEANKYYFIESTIALFVSFLINVFVVSVFAEAFYGKTNMEVGQKCNESGSPHSELFPANNETLEVDIYKGGVVLGCFFGPAALYIWAIGILAAGQSSTMTGTYSGQFVMEGFLNLRWSRFARVLLT…
ROL42433.1	MKTERDGDVLEESQREPDLYSPVSPQDQPVSTYFEEKVPIPDDDTTKVAHAERCGVEVFTGPIPSKTLRGSGSKLSSDTGRMFSFRKLWAFTGPGFLMSIAYLDPGNIESDLQSGAKAGFKLLWVLLASTIIGLLLQRLAARLGVVTGMHLAEVCNRHYPTVPRIILWLMVELAIIGSDMQEVIGCAIALNLLSVGRIPLWAGVLITIIDTFVFLFLDKYGLRKLEAFFGFLITVMALSFGYEYVRVAPDQGEVLKGMFLPYCQGCGPTQLEQAVGIVGAVIMPHNIYLHSALVKSRDIDRGNKREVKEANKYYFIESTIALFVSFLINVFVVSVFAEAFYGKTNMEVGQKCNESGSPHSDLFPANNGTLEVDIYKGGVVLGCFFGPAALYIWAIGILA…
ALD62535.1	MKTERDGDVLEESQREPDLYSPVSPQDQPVSTYFEEKVPIPDNDTAKMFSFRKLWAFTGPGFLMSIAYLDPGNIESDLQSGAKAGFKLLWVLLASTIIGLLLQRLAARLGVVTGMHLAEVCNRHYPTVPRIILWLMVELAIIGSDMQEVIGCAIALNLLSVGRIPLWAGVLITIIDTFVFLFLDKYGLRKLEAFFGFLITVMALSFGFEYVRVAPDQGEVLKGMFLPYCQGCGPTQLEQAVGIVGAVIMPHNIYLHSALVKSRDIDRGNKREVKEANKYYFIESSIALFVSFLINVFVVAVFAEAFYGKTNMEVGQKCNESGSPHSDLFPANNETLQVDIYKGGVVLGCFFGPAALYIWAIGILAAGQSSTMTGTYSGQFVMEGFLNLRWSRFARVLLT…
ADB44208.1	METERDEDVPEESKREPALYSPVSPQDQPVSTYFDERVPIPDNDSAKMFSFRKLWAFTGPGFLMSIAYLDPGNIESDLQCGAIAGFKLLWVLLAATIIGLLLQRLAARLGVVTGMHLAEVRNRHYPMVPRIILWLMVELAIIGSDMQEVIGSAIALNLLSVGRIPLWGGVLITIIDTFVFLFLDKYGLRKLEAFFGVLITIMALSFGFEYVRVAPDQGEVLKGMFLPYCQGCGPTQLEQAVGIVGAVIMPHNIYLHSALVKSRDIDRANKREVKEANKYYFIESSIALFVSFLINVFAVAVFAEAFYGKTNMEVGQKCNQSGSPHSDLFPANNETLEVDIYKGGVVLGCFFGPAALYIWAIGILAAGQSSTMTGTYSGQFVMEGFLNLRWSRFARVLLT…
XP_026076512.1	MKTEQEEDAAQEAETQSGPVSDPQHDPVSTYFEQKVPIPEDDVPKLFSFRKLWAFTGPGFLMSIAYLDPGNIESDLQSGAIAGFKLLWVLLGATIIGLLLQRLAARLGVVTGMHLAEVCNRHYPTVPRIILWLMVELAIIGSDMQEVIGCAIAFNLLSVGRIPLWAGVLITIFDTFVFLFLDKYGLRKLEAFFGLLITIMAFSFGYEYVRVAPDQAEVMKGMFVPYCSGCGAAQLEQAVGIVGAVIMPHNIYLHSALVKSRDINRGNKKEVKEANKYYFIESSIALFVSFLINVFVVAVFAEAFYGKTNMEVGQKCNETGSPHSELFPANNQTLEVDIYKGGVVLGCFFGPAALYIWAVGILAAGQSSTMTGTYSGQFVMEGFLNLRWSRFARVLLTRS…
AAF01778.2	MKTERDGDVLEESVQEPDLYSPVSPLPQDQAISTYFEEKVPIPEDDRAKMFSFRKLWAFTGPGFLMSIAYLDPGNIESDLQSGAKAGFKLLWVLLGSTIIGLLLQRLAARLGVVTGMHLAEVCNRHYPTVPRIILWLMVELAIIGSDMQEVIGCAIAFNLLSVGRIPLWAGVLITIIDTFVFLFLDKYGLKKLEAFFGFLIPIMAISFRYKYVRVAPDQAEVLKGMFLPYCSGCGAEQLKQAVGIVGAVIMPHNVYLHSALVKSRDVDRGNKKEVKEANKYYFIESTIALFVSFLINVFVVAVFAEAFYDKTNIEVNAKCNASGSPHTDLFPLDNSTLQVDIFKGGVVLGCFFGPAALYIWAIGILAAGQSSTMTGTYSGQFVMEGFLNLRWSRFARVL…
TRY86561.1	MRTGRDGGAPEEALQQGASLYSPVVSSSGPQNEDEEPVSTYFEEKVPIPQEPADKMFSFRKLWAFTGPGFLMSIAYLDPGNIESDLQSGARAGFKLLWVLLGSTIIGLLLQRLAARLGVVTGMHLAEVCNRHYPTVPRIILWLMVELAIIGSDMQEVIGCAIALNLLSVGRIPLWAGVLITITDTFVFLFLDKYGLRKLEAFFGLLITIMAVSFGYEYVRVAPDQAELLKGMFIPYCSGCGAVQLEQAVGIIGAVIMPHNIYLHSALVKSREVDRSNKKEVKEANKYYFIESTIALFVSFLINVFVVAVFAEAFYGKTNMDVSRQCNDSGSPHSELFPANNQTLEVDIYKGGVVLGCFFGPAALYIWAVGILAAGQSSTMTGTYSGQFVMEGFLNLRWS…
KAA0708081.1	MERRLISNSERTTRSSIVDHFGLKLEKKKENPSHQNEVTPADPELHSHVSPVQHEEPISTYLEEKVPIPDDDVSKIFSFRKLWAFTGPGFLMSIAYLDPGNIESDLQSGAKAGYKLLWVLLGATIIGLLLQRLAARLGVVTGMHLAEVCNQYYPTTPRIILWLMVELAIIGSDMQEVIGCAIALNLLSVGRIPLWAGVLITIVDTFVFLFLDKYGLRKLEAFFGFLITVMALSFGYEYVRVGPDQGEVLKGMFVPYCSGCGPVQLQQAVGIVGAVIMPHNIYLHSALVKSREINRANKKEVKEANKYFFIEASIALFISFLINVFVVAVFAEAFYGKTNMQVSQTCNETGSPHTDLFPLNNETLQVDIYKGGIVLGCFFGPVALYIWAIGILAAGQSST…
QCW64107.1	MKTEDDGELLEENPPQQNALTQDDPEVYSHASPPLQVEPISTYFEEKVPIPEDDATKIFSFRKLWAFTGPGFLMSIAYLDPGNIESDLQSGAKAGYKLLWVLLGATIIGLLLQRLAARLGVVTGMHLAEVCNQYYPTRPRVILWLMVELAIIGSDMQEVIGCAIALNLLSVGRIPLWAGVLITIIDTFVFLFLDKYGLRKLEAFFGLLITVMAFSFGFEYVRVGPDQGEVLKGMFVPYCSGCGPVQLEQAVGIVGAVIMPHNIYLHSALVKSREINRGNKNEVKEANKYYFIESSIALFVSFLINVFVVAVFAEAFYGKTNMQVGQKCNETGSPHTGLFPINNETLEVDIYKGGIVLGCFFGPVALYIWAIGILAAGQSSTMTGTYSGQFVMEGFLNLR…
ROL42458.1	MIWSVQVLLGSCGYDDKCVQVTFFRMFSFRKLWAFSGPGFLMSIAYLDPGNIESDLQCGAIAGFKLLWVLLAATIIGLLLQRLAARLGVVTGMHLAEVCYRHYPMVPRIFLWLMVELAIIGSDMQEVIGSAIALNLLSVGRIPLWGGVLITIIDTFVFLFLDKYGLRKLEAFFGFLITVMALSFGYEYVRAAPDQGEVLKGMFLPYCSGCGRAELEQAVGIVGAVIMPHNIYLHSALVKSRDIDRANKREVKEANKYNFIESTIALFISFLINVFVVSVFAEAFYGKTNMEVGQQCNETGSPYSGLFPANNETLEVDIYKGGVVLGCFFGPAALYIWAIGILAAGQSSTMTGTYSGQFVMEGFLNLRWSRFARVLLTRSIAIFPTLLVAIFRDVQNLTG…
XP_023689034.1	MGERSRLKEVQENRAVQNSVYSSIGPATDDDAFSTYFEEKIPVPEHGGQMGFSFRKLWAFTGPGFLMSIAYLDPGNIESDLQSGAKAGFKLLWVLLGATIIGLLLQRLAARLGVVTGMHLAEVCNRQYPTVPRIILWFMVELAIIGSDMQEVIGCAIAFNLLSAGRIPLWAGVLITIFDTFVFLFLDKYGLRKLEAFFGFLITIMAITFGYEYVVAGPNQGELLKGMFLPYCKDCGPVQLEQAVGIVGAVIMPHNIYLHSALVKSRQVDRTNKKEVKEANKYFFIESAVALFVSFLINVFVVAVFAEAFYDRTNLYVHEKCNQTGSPHAALFPQNNGTLEVDIYKGGVVLGCFFGPAALYIWALGILAAGQSSTMTGTYSGQFVMEGFLNLRWSRFARV…
XP_023688987.1	MTTNQEPDLLEEEVQENRAVQNSVYSSIGPATDDDAFSTYFEEKIPVPEHGGQMGFSFRKLWAFTGPGFLMSIAYLDPGNIESDLQSGAKAGFKLLWVLLGATIIGLLLQRLAARLGVVTGMHLAEVCNRQYPTVPRIILWFMVELAIIGSDMQEVIGCAIAFNLLSAGRIPLWAGVLITIFDTFVFLFLDKYGLRKLEAFFGFLITIMAITFGYEYVVAGPNQGELLKGMFLPYCKDCGPVQLEQAVGIVGAVIMPHNIYLHSALVKSRQVDRTNKKEVKEANKYFFIESAVALFVSFLINVFVVAVFAEAFYDRTNLYVHEKCNQTGSPHAALFPQNNGTLEVDIYKGGVVLGCFFGPAALYIWALGILAAGQSSTMTGTYSGQFVMEGFLNLRWSR…
XP_023689045.1	MTTNQEPDLLEEEVQENRAVQNSVYSSIGPATDDDAFSTYFEEKIPVPEHGGQMGFSFRKLWAFTGPGFLMSIAYLDPGNIESDLQSGAKAGFKLLWVLLGATIIGLLLQRLAARLGVVTGMHLAEVCNRQYPTVPRIILWFMVELAIIGSDMQEVIGCAIAFNLLSAGRIPLWAGVLITIFDTFVFLFLDKYGLRKLEAFFGFLITIMAITFGYEYVVAGPNQGELLKGMFLPYCKDCGPVQLEQAVGIVGAVIMPHNIYLHSALVKSRQVDRTNKKEVKEANKYFFIESAVALFVSFLINVFVVAVFAEAFYDRTNLYVHEKCNQTGSPHAALFPQNNGTLEVDIYKGGVVLGCFFGPAALYIWALGILAAGQSSTMTGTYSGQFVMEGFLNLRWSR…
XP_023689056.1	MGFSFRKLWAFTGPGFLMSIAYLDPGNIESDLQSGAKAGFKLLWVLLGATIIGLLLQRLAARLGVVTGMHLAEVCNRQYPTVPRIILWFMVELAIIGSDMQEVIGCAIAFNLLSAGRIPLWAGVLITIFDTFVFLFLDKYGLRKLEAFFGFLITIMAITFGYEYVVAGPNQGELLKGMFLPYCKDCGPVQLEQAVGIVGAVIMPHNIYLHSALVKSRQVDRTNKKEVKEANKYFFIESAVALFVSFLINVFVVAVFAEAFYDRTNLYVHEKCNQTGSPHAALFPQNNGTLEVDIYKGGVVLGCFFGPAALYIWALGILAAGQSSTMTGTYSGQFVMEGFLNLRWSRFARVLLTRSIAITPTLLVAIFQDVHRLTGMNDFLNVLQSMQLPFALIPILTFT…
XP_018616167.1	MKRFSSAILSVFTPDRVPALRNTDVFPLPPSTMGTEEQTSVPEGEVPPENGDIQATHTHYSSMHTKTYSTSKDEVYTTYFEEKVPIPQDTSETCFSFRKLWAFTGPGFLMSIAYLDPGNIESDLQSGAKAGFKLLWVLLGATIIGLLLQRLAARLGVVTGMHLAEVCNRQYPTVPRIILWLMVELAIIGSDMQEVIGCAIAFNLLSVGRIPLWAGVLITIFDTFVFLFLDKYGLRRLEAFFGFLITIMALTFGYEYVTVKPDQGQLLKGMFLPYCEGCGPVQLEQAVGIVGAVIMPHNIYLHSALVKSRQVDRTKPREVKEANKYYFIESTIALFVSFLINVFVVAVFAEGFYGRTNLDVHNVCNHSGSPHTHLFPQDNNTLQVDIYKGGVVLGCFFGP…
XP_018616168.1	MGTEEQTSVPEGEVPPENGDIQATHTHYSSMHTKTYSTSKDEVYTTYFEEKVPIPQDTSETCFSFRKLWAFTGPGFLMSIAYLDPGNIESDLQSGAKAGFKLLWVLLGATIIGLLLQRLAARLGVVTGMHLAEVCNRQYPTVPRIILWLMVELAIIGSDMQEVIGCAIAFNLLSVGRIPLWAGVLITIFDTFVFLFLDKYGLRRLEAFFGFLITIMALTFGYEYVTVKPDQGQLLKGMFLPYCEGCGPVQLEQAVGIVGAVIMPHNIYLHSALVKSRQVDRTKPREVKEANKYYFIESTIALFVSFLINVFVVAVFAEGFYGRTNLDVHNVCNHSGSPHTHLFPQDNNTLQVDIYKGGVVLGCFFGPVALYIWAVGILAAGQSSTMTGTYSGQFVMEGF…
KPP72553.1	MCSHLCPLFLSCNAGEVPPENGDIQATHTHYSSMHTKTYSTSKDEVYTTYFEEKVPIPQDTSETCFSFRKLWAFTGPGFLMSIAYLDPGNIESDLQSGAKAGFKLLWVLLGATIIGLLLQRLAARLGVVTGMHLAEVCNRQYPTVPRIILWLMVELAIIGSDMQEVIGCAIAFNLLSVGRIPLWAGVLITIFDTFVFLFLDKYGLRRLEAFFGFLITIMALTFGYEYVTVKPDQGQLLKGMFLPYCEGCGPVQLEQAVGIVGAVIMPHNIYLHSALVKSRQVDRTKPREVKEANKYYFIESTIALFVSFLINVFVVAVFAEGFYGRTNLDVHNVCNHSGSPHTHLFPQDNNTLQVDIYKGGVVLGCFFGPVALYIWAVGILAAGQSSTMTGTYSGQFVM…
XP_015199715.1	MRRLGNTKIFAIFRPGTVFPPESFHIPPLPPAAAGTMPTSHEPSIQEEPSSQENREAAMVQTQYNAVSPPAANEQDDEPFTTYFEEKVPIPEDTKAGVFSFRKLWAFTGPGFLMSIAYLDPGNIESDLQSXXXXXXQLLWVLLGATIIGLLLQRLAARLGVVTGMHLAEVCYRQYPTVPRILLWLMVELAIIGSDMQEVIGCAIAFNLLSVGRIPLWGGVLITIIDTFVFLFLDKYGLRKLEAFFGFLITIMGLTFGYEYVMVKPDQGELLKGMFLPYCKDCGPVQMEQAVGIVGAVIMPHNIYLHSALVKSRQVNRANKKEVKEANKYFFIESCIALFVSFLINVFVVTVFAEAFYGQTNQQVHDMCVNHSSPHSGLFPSNNQTLQVDIYKGGVVLGC…
XP_023654589.1	MKRLRAKIFSVYSSGEGSYPVTIDVLPLPQSIMGTDEQPDLPEGEGLKDSGDIQTINCHYSYSTPQDDGEAHSTYFDEKVPIPEHSSEVFSFRKLWAFTGPGFLMSIAYLDPGNIESDLQSGSKAGFKLLWVLLCATIVGLLLQRLAARLGIVTGMHLAEVCNRHYPTVPRIILWLMVELAIIGSDMQEVIGCAIAFNLLSLNRIPLWGGVLITISDTFLFLFLDKYGLRKLEAFFGFLITVMAITFGYEYVMVSPDQGQLLKGMFVPYCQGCGPVQLEQAVGIVGAVIMPHNIYLHSALVKSREVDRADAKKVKEANKYFFIESTIALFISFLINVFVVAVFAAGFYGHTNSQVHAVCNQSGSPNTDLFPQDNNTLQVDIYKGGVMLGCFFGPAALYI…
XP_023654590.1	MGTDEQPDLPEGEGLKDSGDIQTINCHYSYSTPQDDGEAHSTYFDEKVPIPEHSSEVFSFRKLWAFTGPGFLMSIAYLDPGNIESDLQSGSKAGFKLLWVLLCATIVGLLLQRLAARLGIVTGMHLAEVCNRHYPTVPRIILWLMVELAIIGSDMQEVIGCAIAFNLLSLNRIPLWGGVLITISDTFLFLFLDKYGLRKLEAFFGFLITVMAITFGYEYVMVSPDQGQLLKGMFVPYCQGCGPVQLEQAVGIVGAVIMPHNIYLHSALVKSREVDRADAKKVKEANKYFFIESTIALFISFLINVFVVAVFAAGFYGHTNSQVHAVCNQSGSPNTDLFPQDNNTLQVDIYKGGVMLGCFFGPAALYIWAVGILAAGQSSTMTGTYSGQFVMEGFLNLRW…
XP_028654477.1	MPPVQDSAQPNADAEMACDEADGLDSPMGSREFSEPPLSTYFEEKVPIPEDSKDGFSFRKLWAFTGPGFLMSIAYLDPGNIESDLQSGAKAGFKLLWVLLFATVIGLLLQRLAARLGVVTGMHLAEVCHRQYPKVPRIILWLMVETAIIGSDMQEVIGCAIAFNLLSSGRIPLWGGVLITIIDTFMFLFLDKYGLRKLEAFFGLLITIMALTFGYEYVIAKPDQGQLLKGMFLPYCQGCGAPQLEQAVGIVGAVIMPHNIYLHSALVKSREINRSNKKEVKEANKYFFIESCIALFVSFLINVFVVAVFAQAFFNKKNSDVHAICANSTGPHSPHSALFPDDNKTLEVDIYKGGVVLGCFFGPAALYIWALGILAAGQSSTMTGTYSGQFVMEGFLNLN…
XP_018581314.1	MSEHSRLKEAHENGIIPTSSPQYSSVSPTYPPLSEEEPFSTYFEEKVPIPEGGDEMGFSFRKLWAFTGPGFLMSIAYLDPGNIESDLQSGAIAKFKLLWVLLGSTIIGLLLQRLAARLGVVTGMHLAEVCNRYYPTVPRIILWLMVELAIVGSDMQEVIGCAIAFSLLSAGRIPLWAGVLITIFDTFVFLFLDKYGLRKLEAFFGFLITVMAVTFGYEYVVVHPNQGELLKGMFLPYCKDCGPVQLEQAVGIVGAVIMPHNIYLHSALVKSRQIDRTNKKEVKEANKYFFIESTIALTVSFLINVFVVAVFAEAFYDRRNIDVNDKCNQSGSPHSDLFPRNNGTLEVDIYKGGVVLGCYFGPAALYIWAVGILAAGQSSTMTGTYSGQFVMEGFLNLRW…
XP_018581312.1	METDQEPELLEEEAHENGIIPTSSPQYSSVSPTYPPLSEEEPFSTYFEEKVPIPEGGDEMGFSFRKLWAFTGPGFLMSIAYLDPGNIESDLQSGAIAKFKLLWVLLGSTIIGLLLQRLAARLGVVTGMHLAEVCNRYYPTVPRIILWLMVELAIVGSDMQEVIGCAIAFSLLSAGRIPLWAGVLITIFDTFVFLFLDKYGLRKLEAFFGFLITVMAVTFGYEYVVVHPNQGELLKGMFLPYCKDCGPVQLEQAVGIVGAVIMPHNIYLHSALVKSRQIDRTNKKEVKEANKYFFIESTIALTVSFLINVFVVAVFAEAFYDRRNIDVNDKCNQSGSPHSDLFPRNNGTLEVDIYKGGVVLGCYFGPAALYIWAVGILAAGQSSTMTGTYSGQFVMEGFL…
KPP76294.1	MSFSFSVVVCLTAEEAHENGIIPTSSPQYSSVSPTYPPLSEEEPFSTYFEEKVPIPEGGDEMGFSFRKLWAFTGPGFLMSIAYLDPGNIESDLQSGAIAKFKLLWVLLGSTIIGLLLQRLAARLGVVTGMHLAEVCNRYYPTVPRIILWLMVELAIVGSDMQEVIGCAIAFSLLSAGRIPLWAGVLITIFDTFVFLFLDKYGLRKLEAFFGFLITVMAVTFGYEYVVVHPNQGELLKGMFLPYCKDCGPVQLEQAVGIVGAVIMPHNIYLHSALVKSRQIDRTNKKEVKEANKYFFIESTIALTVSFLINVFVVAVFAEAFYDRRNIDVNDKCNQSGSPHSDLFPRNNGTLEVDIYKGGVVLGCYFGPAALYIWAVGILAAGQSSTMTGTYSGQFVMEG…
AGI04248.2	MPPDQEPQPLDEENRSLENGEIQTVQTQYSSISPPESPESADEPFSTYFEEKVPIPEDSKPGFSFRKLWAFTGPGFLMSIAYLDPGNIESDLQSGAKAGFKLLWVLMSATILGLLLQRLAARLGVVTGMHLAEVCHRQYPAVPRIVLWLMVELAIIGSDMQEVIGCAIAFNLLSAGRIPLWGGVLITIVDTFVFLFLDKYGLRKLEAFFGFLITIMAITFGYEYVMVKPDQGELLKGMFLPYCQGCGAPQLEQAVGIVGAVIMPHNIYLHSALVKSRQIDRSNKSEVKEANKYFFIESCVALFISFLINVFVVAVFAEAFYGRTNEEVHDVCTNSSSPYSNLFPLNNQTLEVDIYKGGVVLGCFFGPAALYIWAVGILAAGQSSTMTGTYSGQFVMEGF…
ADK12638.2	MPPDQEPQPLDEENRSLENGEIQTVQTQYSSISPPESLESADEPFSTYFEEKVPIPEDSKPGFSFRKLWAFTGPGFLMSIAYLDPGNIESDLQSGAKAGFKLLWVLMSATILGLLLQRLAARLGVVTGMHLAEVCHRQYPAVPRIVLWLMVELAIIGSDMQEVIGCAIAFNLLSAGRIPLWGGVLITIVDTFVFLFLDKYGLRKLEAFFGFLITIMAITFGYEYVMVKPDQGELLKGMFLPYCQGCGAPQLEQAVGIVGAVIMPHNIYLHSALVKSRQIDRSNKSEVKEANKYFFIESCVALFISLLINVFVVAVFAEAFYGRTNEEVHDVCTNSSSPYSNLFPLNNQTLEVDIYKGGVVLGCFFGPAALYIWAVGILAAGQSSTMTGTYSGQFVMEGF…
XP_005918815.1	MFSFLRSGRNPAPEQIHITSLPPSIPTDQEPEQAEGQADDVVEEKGVIQTTYTHRVHSTPSVFLQNHNDEPVSSTYFDEKVPVPEEDGERWISLRKLWAFTGPGFLMSIAYLDPGNIESDLQSGAKAGFKLLWVLLGATIVGLLLQRLAARLGVVTGMHLAEVCNRQYHTVPRIILWVMVELAIIGSDMQEVIGCAIAFNLLSSGRIPLWGGVLITITDTFVFLFLDKYGLRKLEAFFGFLITIMGITFGYEYVTVGPDQGQLLKGMFVPYCEGCGPVQLTQAVGIVGAVIMPHNIYLHSALVKSREVDRSNKKEVKEANKYFFIESTVALFVSFLINVFVVAVFAEAFYQRTNEEVFNVCNQTGSPHLDLFPLNNETLKVDIYKGGVVLGCFFGPAAL…
XP_026009139.1	MFSFLRSGRNPAPEQIHITSLPPSIPTDQEPEQAEGQADDVVEEKGVIQTTYTHRVHSTPSVFLQNHNDEPVSSTYLDEKVPVPEEDGERWISLRKLWAFTGPGFLMSIAYLDPGNIESDLQSGAKAGFKLLWVLLGATIVGLLLQRLAARLGVVTGMHLAEVCNRQYHTVPRIILWVMVELAIIGSDMQEVIGCAIAFNLLSSGRIPLWGGVLITITDTFVFLFLDKYGLRKLEAFFGFLITIMGITFGYEYVTVGPDQGQLLKGMFVPYCEGCGPVQLTQAVGIVGAVIMPHNIYLHSALVKSREVDRSNKKEVKEANKYFFIESTVALFVSFLINVFVVAVFAEAFYQRTNEEVFNVCNQTGSPHLDLFPLNNETLKVDIYKGGVVLGCFFGPAAL…
XP_004560317.1	MFSFLRSGRNPAPEQIHITSLPPSIPTDQEPEQAEGQADDVVEEKGVIQTTYTHRVHSTPSVFLQNHNDEPVSSTYLDEKVPVPEEDGERWISLRKLWAFTGPGFLMSIAYLDPGNIESDLQSGAKAGFKLLWVLLGATIVGLLLQRLAARLGVVTGMHLAEVCNRQYHTVPRIILWVMVELAIIGSDMQEVIGCAIAFNLLSSGRIPLWGGVLITITDTFVFLFLDKYGLRKLEAFFGFLITIMGITFGYEYVTVGPDQGQLLKGMFVPYCEGCGPVQLTQAVGIVGAVIMPHNIYLHSALVKSREVDRSNKKEVKEANKYFFIESTVALFVSFLINVFVVAVFAEAFYQRTNEEVFNVCNQTGSPHLDLFPLNNETLKVDIYKGGVVLGCFFGPAAL…
XP_005741093.1	MFSFLRSGRNPAPEQIHITSLPPSIPTDQEPEQAEGQVDDVVEEKGVIQTTYTHRVHSTPSVFLQNHNDEPVSSTYFDEKVPVPEEDGERWISLRKLWAFTGPGFLMSIAYLDPGNIESDLQSGAKAGFKLLWVLLGATIVGLLLQRLAARLGVVTGMHLAEVCNRQYHTVPRIILWVMVELAIIGSDMQEVIGCAIAFKLLSSGRIPLWGGVLITITDTFVFLFLDKYGLRKLEAFFGFLITIMGITFGYEYVTVGPDQGQLLKGMFVPYCEGCGPVQLTQAVGIVGAVIMPHNIYLHSALVKSREVDRSNKKEVKEANKYFFIESTVALFVSFLINVFVVAVFAEAFYQRTNEEVFNVCNQTGSPHLDLFPLNNETLKVDIYKGGVVLGCFFGPAAL…
XP_005477956.1	MFSFLRSGRNPAPEQIHISSLPPSIPTDQEPEQAEGQADDVVEEKGVIQTTYTHRVHSTPSVFLQNHSDEPVSSTYFDEKVPVPEEDDERWISLRKLWAFTGPGFLMSIAYLDPGNIESDLQSGAKAGFKLLWVLLGATIVGLLLQRLAARLGVVTGMHLAEVCNRQYHTVPRIILWLMVELAIIGSDMQEVIGCAIAFNLLSSGRIPLWGGVLITITDTFVFLFLDKYGLRKLEAFFGFLITIMGITFGYEYVTVGPDQGQLLKGMFVPYCEGCGPVQLGQAVGIVGAVIMPHNIYLHSALVKSREVDQSNKKEVKEANKYFFIESTIALFVSFLINVFVVAVFAEAFYQRTNEEVFNVCNQTGSPHLDLFPLNNETLKVDIYKGGVVLGCFFGPAAL…
XP_030589360.1	MFSFLRSDRNPPPEDIHISSLPPSIPTDPEPDQQTGGQAEDMVEEKVVIQTTHTHRAHATPSVFLQNHNNEPVSSTYFDERVPIPEEDSERWINLRKLWAFTGPGFLMSIAYLDPGNIESDLQSGAKAGFKLLWVLLGATIIGLLLQRLAARLGVVTGMHLAEVCNRQYHTVPRIILWLMVELAIIGSDMQEVIGCAIAFNLLSSGRIPLWGGVLITITDTFVFLFLDKYGLRKLEAFFGFLISIMAITFGYEYVTVGPDQGQLLKGMFVPYCEGCGPVQLGQAVGIVGAVIMPHNIYLHSALVKSREVDRSNKKEVKEANKYFFIESTIALFVSFLINVFVVAVFAEAFYQRTNEEVFNICNQTGSPHSDLFPSNNETLKVDIYKGGVVLGCSFGPAA…
XP_022618929.1	MKMFSFLRPVRDPPPEDIHISSLPPSVPIDQEAEQAGGQDDVVGEKAVIQTTHTHRVSAPSVFLQKQDNDPVSSTYFDQRVPVPKDDSERGISLRKLWAFTGPGFLMSIAYLDPGNIESDLQSGAKAGFKLLWVLLGATIIGLLLQRLAARLGVVTGMHLAEVCNRQYHTVPRIILWLMVELAIIGSDMQEVIGCAIAFSLLSSGRIPLWGGVLITIIDTFVFLFLDKYGLRKLEAFFGLLITIMAITFGYEYVTVSPDQGELLMGMFVPYCKGCGPVQLGQAVGIVGAVIMPHNIYLHSALVKSREVDRTNRKEVKEANKYFFIESTIALFVSFLINVFVVAVFATAFYKRTNLEVHNVCNQSGSPYSHEIPLNNETLEVDIYKGGVVLGCFFGPAAL…
XP_022618928.1	MKMFSFLRPVRDPPPEDIHISSLPPSVPIDQEAEQAGGQADDVVGEKAVIQTTHTHRVSAPSVFLQKQDNDPVSSTYFDQRVPVPKDDSERGISLRKLWAFTGPGFLMSIAYLDPGNIESDLQSGAKAGFKLLWVLLGATIIGLLLQRLAARLGVVTGMHLAEVCNRQYHTVPRIILWLMVELAIIGSDMQEVIGCAIAFSLLSSGRIPLWGGVLITIIDTFVFLFLDKYGLRKLEAFFGLLITIMAITFGYEYVTVSPDQGELLMGMFVPYCKGCGPVQLGQAVGIVGAVIMPHNIYLHSALVKSREVDRTNRKEVKEANKYFFIESTIALFVSFLINVFVVAVFATAFYKRTNLEVHNVCNQSGSPYSHEIPLNNETLEVDIYKGGVVLGCFFGPAA…
XP_023248806.1	MKMFSFLRPVRDPPPEDIHISSLPPSVPIDQEAEQAGGQADDVVGEKAVIQTTHTHRVSAPSVFLQKQDNDPLSSTYFDQRVPVPEDDSERGFSLRKLWAFTGPGFLMSIAYLDPGNIESDLQSGAKAGFKLLWVLLGATIIGLLLQRLAARLGVVTGMHLAEVCNRQYHTVPRIILWLMVELAIIGSDMQEVIGCAIAFSLLSSGRIPLWGGVLITIIDTFVFLFLDKYGLRKLEAFFGLLITVMAITFGYEFLSVSPPSVCDSESDQGQLLMGMFVPYCKDCGPVQLGQAVGIVGAVIMPHNIYLHSALVKSREVDRTNRKEVKEANKYFFIESTIALFVSFLINVFVVAVFATAFYKRTNLEVHNVCNQSGSPHAHEIPLNNETLEVDIYKGGVVL…
XP_026222645.1	MKMFSFLRTARDPSSENIHISSLPPSIPTDQEPQQTGEQADDVARENAVIQTTHTHRVAAPSVFLQKQNNEPVSSTYFEERVPVPEENNERGISLRKLWAFTGPGFLMSIAYLDPGNIESDLQSGAKAGFKLLWVLLGATVIGLLLQRLAARLGVVTGMHLAEVCNRQYHTVPRIILWLMVELAIIGSDMQEVIGCAIAFNLLSSGRIPLWGGVLITIIDTFVFLFLDKYGLRKLEAFFGLLITVMAITFGYEYVTVSPDQGQLLMGMFVPYCKGCGPVQLIQAVGIVGAVIMPHNIYLHSALVKSREVDRSNKKEVKEANKYFFIESTIALFVSFLINVFVVAVFAEAFYQRTNIEVYNVCNQTGSPHSDLFPLNNETLEVDIYKGGVVLGCFFGPAA…
XP_020443402.1	MQMFSFLRPVRGPPPENIYISSLPPSVPTDQGPEQTEAQANDVGEEKAAVIQTTHTHRVSGPSVFLQKNNNEPVSSTYFEQRVPVPEEESERVISLRKLWAFTGPGFLMSIAYLDPGNIESDLQSGAKAGFKLLWVLLGATVIGLLLQRMAVRLGVVTGMHLAEVCNRQYHTVPRIILWLMVELAIIGSDMQEVIGCAIAFSLLSSGRIPLWGGVLITIIDTFVFLFLDKYGLRKLEAFFGLLITIMAITFGYEYVTVSPDQGQLLKGMFTPYCKGCGPVQLEQAVGIVGAVIMPHNIYLHSALVKSREVDRSSKKEVKEANKYFFIESSIALFISFLINVFVVAVFAEAFYNRTNIEVYNVCNQTGSPHSHLFPQSNETLEVDIYKGGVVLGCFFGPA…
XP_028264855.1	MFSFLRSVRSPPHESIHISSLPPSLPTDEEPEQTGGPADGVAAEKAVIQTTHTHSRLSTPSVFNQNNNNEPVSSTYFEQRVPVPQEDSERGISLRKLWAFTGPGFLMSIAYLDPGNIESDLQSGAKAGFKLLWVLLGATIIGLLLQRLAARLGVVTGMHLAEVCNRQYQTVPRIILWLMVELAIIGSDMQEVIGCAIAFSLLSSGRIPLWGGVLITIVDTFVFLFLDKYGLRKLEAFFGLLITIMAITFGYEYVTVRPDQGQLLKGMFVPYCEGCGPVQLAQAVGIVGAVIMPHNIYLHSALVKSREVNRSNKTEVKEANKYFFIESSIALFVSFLINVFVVAVFAEAFYQRTNMEVYSVCNQTGSPHLQLFPLNNETLGVDIYKGGVVLGCFFGPAAL…
XP_018531348.1	MKLFSSLRSGRDPPTEDIHISSLPPSIPTDHEAEQTEEQVDNVVEEKAVIQTTHTHRVSAPSVFLQKQENEPVSATYFEQRVPVPEDNTESCISLRKLWAFTGPGFLMSIAYLDPGNIESDLQSGAKAGFKLLWVLLGATIIGLLLQRLAARLGVVTGMHLAEVCHRQYHTVPRIILWLMVELAIIGSDMQEVIGCAIAFNLLSSGRIPLWGGVLITISDTFVFLFLDKYGLRRLEAFFGLLITIMAITFGYEYVTVGPDQGQLLMGMFVPYCKDCGPVQVGQAVGIVGAVIMPHNIYLHSALVKSREVNRSNKKEVKEANKYFFIESTIALFVSFLINVFVVAVFAEAFYKRTNIEVYNVCNQSGSPHSHLFPLNNETLEVDIYKGGVVLGCFFGPAA…
XP_031168447.1	MSFLRSVRAPPPENIHISSLPPSVPTDQEPGPTGGQDGDVEREKAVIQTTHTHRVSSVFLQKQNNEPVSSTYFEQRVPVPEEDSQRGFSLRKLWAFTGPGFLMSIAYLDPGNIESDLQSGAKAGFKLLWVLLAATIIGLLLQRLAARLGVVTGMHLAEVCNRQYHTVPRIILWLMVELAIIGSDMQEVIGCAIAFNLLSSGRIPLWGGVLITIIDTFVFLFLDKYGLRKLEAFFGLLITIMAITFGYEYVTVSPDQGQLLKGMFVPYCEGCGPVQLAQAVGIVGAVIMPHNIYLHSALVKSREVDRSNKEEVKEANKYFFIESTVALFVSFLINVFVVAVFAEAFYGRTNQEVYSVCNQTGSPHLDIFPLNNQTLEVNLYKGGVVLGCFFGPAALYIWA…
XP_028439545.1	MSFLRSVRAPPPENIHISSLPPSVPTDQEPGPTGGLAGDVEREKAAIQTTHTHRVSSVFLQKQNNEPVSSTYFEQRVPVPEEGGQRAFSLRKLWAFTGPGFLMSIAYLDPGNIESDLQSGAKAGFKLLWVLLAATIIGLLLQRLAARLGVVTGMHLAEVCNRQYHTVPRIILWLMVELAIIGSDMQEVIGCAIAFNLLSSGRIPLWGGVLITIIDTFVFLFLDKYGLRKLEAFFGLLITIMAITFGYEYVTVSPDQGQLLKGMFVPYCEGCGPVQLAQAVGIVGAVIMPHNIYLHSALVKSREVDRSNKEEVKEANKYFFIESTVALFVSFLINVFVVAVFAEAFYGRTNQEVYSVCNQTGSPHLDIFPLNNQTLEVNLYKGGVVLGCFFGPAALYIWA…
XP_029292408.1	MSPKKKMFPFLRSVRDRPPENIHISSLPPSVPTDPAEQTGAQADDLEGEKAVIQTTHTHRGSSVFLQKQNNEPVSSTYFEQRVPVPEEGSEGGFSLRKLWAFSGPGFLMSIAYLDPGNIESDLQSGAKAGFKLLWVLLAATIIGLLLQRLAARLGVITGMHLAEVCNRQYHTVPRVILWLMVELAIIGSDMQEVIGCAIAFNLLSSGRIPLWGGVLITIIDTFVFLFLDKYGLRKLEAFFALLITIMAITFGYEYVTVSPDQGQLLKGMFVPYCEGCGPVQLTQAVGIVGAVIMPHNIYLHSALVKSREVDRSNKKEVEEANKYFFIESTVALFISFLINVFVVAVFAEAFYGRTNQEVYSVCNETGSPHSHLFPLNNETLEVNLFKGGVVLGCFFGPA…
KAA8591474.1	AISSLPPFLPILLPSSPSSFLPCPVRQHLSRRGDVQPAGRMFPVPLSINTSGNRANQNQSLEFRDPPPENIHISSLPPSVPTEQEPGPTGGQAGDVEREKALIQTTHTHRVSSVFVQKQNHEPVSSTYFEQRVPVPGEDSQLWAFTGPGFLMSIAYLDPGNIESDLQSGAKAGFKLLWVLLAATIIGLLLQRLAARLGVVTGMHLAEVCNRQIPLWGGVLITIIDTFVFLFLDKYGLRKLEAFFGLLITIMAITFGYEYVTVSPDQGQLLKGMFVPYCEGCGPAQLAQAVGIVGAVIMPHNIYLHSALVKSREVDRSNKEEVKEANKYFFIESTVALFVSFLINVFVVAVFAEAFYGRTNQEVYSVCNQTGSPYLDIFPLNNQTLEVNLYKGGVVLGCF…
XP_026188434.1	MFSFLRSVRDTSRENIHISSLPPSVFTDQEPEQIGKQAGDFVEEKAVIRTTHTHSVSPPSVFLQKENDESISGAYFEQKVPVPKEDNERGISLRKLWAFTGPGFLMSIAYLDPGNIESDLQSGAKADFKLLWVLLGATVIGLLLQRLAARLGVVTGMHLAEVCNRQYHTVPRIILWLMVEVAIIGSDMQEVIGCAIAFSLLSSGRIPLWGGVLITIIDTFVFLFLDKYGLRKLEAFFGLLIAIMTITFGYEYMTVRPDQGQLLMGMFVPFCKDCGPVQLGQAVGIVGAVIMPHNIYLHSALVKSREVDRSNKKEVKEANKYFFIESTIALFVSFLINVFVVAVFAEAFYKRTNIEVYNVCNQTGSPHSSLFPLNNETLQVDIYKGGVVLGCFFGPAALY…
XP_026188432.1	MFSFLRSVRDTSRENIHISSLPPSVFTDQEPEQIGKQGDFVEEKAVIRTTHTHSVSPPSVFLQKENDESISGAYFEQKVPVPKEDNERGISLRKLWAFTGPGFLMSIAYLDPGNIESDLQSGAKADFKLLWVLLGATVIGLLLQRLAARLGVVTGMHLAEVCNRQYHTVPRIILWLMVEVAIIGSDMQEVIGCAIAFSLLSSGRIPLWGGVLITIIDTFVFLFLDKYGLRKLEAFFGLLIAIMTITFGYEYMTVRPDQGQLLMGMFVPFCKDCGPVQLGQAVGIVGAVIMPHNIYLHSALVKSREVDRSNKKEVKEANKYFFIESTIALFVSFLINVFVVAVFAEAFYKRTNIEVYNVCNQTGSPHSSLFPLNNETLQVDIYKGGVVLGCFFGPAALYI…
XP_026188433.1	MFSFLRSVRDTSRENIHISSLPPSVFTDQEPEQIGKQAGDFVEEKAVIRTTHTHSVSPPSVFLQKENDESISGAYFEQKVPVPKEDNERGISLRKLWAFTGPGFLMSIAYLDPGNIESDLQSGAKADFKVPRIILWLMVEVAIIGSDMQEVIGCAIAFSLLSSGRIPLWGGVLITIIDTFVFLFLDKYGLRKLEAFFGLLIAIMTITFGYEYMTVRPDQGQLLMGMFVPFCKDCGPVQLGQAVGIVGAVIMPHNIYLHSALVKSREVDRSNKKEVKEANKYFFIESTIALFVSFLINVFVVAVFAEAFYKRTNIEVYNVCNQTGSPHSSLFPLNNETLQVDIYKGGVVLGCFFGPAALYIWAVGILAAGQSSTMTGTYSGQFVMEGFLNLRWSRFARVL…
XP_023126761.1	MFSFLRPARNPPLENIHISSLPPGFPTDQEPEPTVEQAQDVLDEKPVIQTTYTHRGQLVFLQNNNEPVATTYFDQRVPVPDEDTEKRISLRKLWAFTGPGFLMSIAYLDPGNIESDLQSGAKAGFKLLWVLLGATVIGLLLQRLAARLGVVTGMHLAEVCNRQYHTVPRIILWLMVELAIIGSDMQEVIGCAIAFNLLSSGSIPLWGGVLITIIDTFVFLFLDKYGLRKLEAFFGVLITIMAITFGYEYVTVAPDQAQLLKGMFVPYCEGCSPVQLTQAVGIVGAVIMPHNIYLHSALVKSREVDRSNKKEVKEANKYFFMESTIALFVSFLINVFVVAVFAEAFYQKTNAEVHSVCNESGSPHSDLFPLDNGTLEVDIYKGGVVLGCFFGPAALYIWA…
XP_023126762.1	MSIAYLDPGNIESDLQSGAKAGFKLLWVLLGATVIGLLLQRLAARLGVVTGMHLAEVCNRQYHTVPRIILWLMVELAIIGSDMQEVIGCAIAFNLLSSGSIPLWGGVLITIIDTFVFLFLDKYGLRKLEAFFGVLITIMAITFGYEYVTVAPDQAQLLKGMFVPYCEGCSPVQLTQAVGIVGAVIMPHNIYLHSALVKSREVDRSNKKEVKEANKYFFMESTIALFVSFLINVFVVAVFAEAFYQKTNAEVHSVCNESGSPHSDLFPLDNGTLEVDIYKGGVVLGCFFGPAALYIWAVGILAAGQSSTMTGTYSGQFVMEGFLNLRWSRFARVLFTRSIAITPTLLVAVFQDVHHLTGMNDFLNVLQSMQLPFALIPILTFTSLPSLMNEFANGLVYKI…
XP_008292027.1	MLSFLRSGETPPPENIHISSLPPSIPTDQEPEPGGERAEDMLDEKPVVQTTHTHRGLSAPSVFLQHNNAPLPSTYFDQRVPVPEEHSEKGINLRKLWAFTGPGFLMSIAYLDPGNIESDLQSGAKAGFKLLWVLLAATVIGLLLQRLAARLGVVTGMHLAEVCNRQYHTVPRIILWLMVELAIIGSDMQEVIGCAIAFSLLSSGRIPLWGGVLITIVDTFVFLFLDKYGLRKLEAFFGLLISIMAITFGYEYVMVGPDQAQLLKGMFVPYCEGCGPVQLTQAVGIVGAVIMPHNIYLHSALVKSREVDRSNKKEVREANKYFFVESTIALFVSFLINVFVVAVFAEAFYQRTNAEVHSVCNESGSPHSNMFPVNNETLEVDIYKGGVVLGCFFGPAALY…
XP_008292026.1	MLSFLRSGETPPPENIHISSLPPSIPTDQEPEPGGERGQDDMLDEKPVVQTTHTHRGLSAPSVFLQHNNAPLPSTYFDQRVPVPEEHSEKGINLRKLWAFTGPGFLMSIAYLDPGNIESDLQSGAKAGFKLLWVLLAATVIGLLLQRLAARLGVVTGMHLAEVCNRQYHTVPRIILWLMVELAIIGSDMQEVIGCAIAFSLLSSGRIPLWGGVLITIVDTFVFLFLDKYGLRKLEAFFGLLISIMAITFGYEYVMVGPDQAQLLKGMFVPYCEGCGPVQLTQAVGIVGAVIMPHNIYLHSALVKSREVDRSNKKEVREANKYFFVESTIALFVSFLINVFVVAVFAEAFYQRTNAEVHSVCNESGSPHSNMFPVNNETLEVDIYKGGVVLGCFFGPAAL…
XP_020505942.1	MFSFLRKVRDPPPENIHISCLPPSIPTDQEPEQTGGIAGDVVEEKAVIQTTHTHRVTPPSVFLQKQNNEPVSSTYFDQRVPVPDDHGERGISLRKLWAFTGPGFLMSIAYLDPGNIESDLQSGAKAGFKLLWVLLGATIIGLLLQRLAARLGVVTGMHLAEVCNRQYHTVPRIILWLMVELAIIGSDMQEVIGCAIAFSLLSAGRIPLWGGVLITIIDTFVFLFLDKYGLRKLEAFFGVLITVMAITFGYEYVTVSPDQGEVLKGMFVPYCEGCGPVQMGQAVGIVGAVIMPHNIYLHSALVKSREVDRTNKKEVREANKYFFIESTVALFLSFLINVFVVAVFAEAFYGRTNQEVYTVCNETGSPHSHLFPQDNQTLTVDIYKGGVVLGCFFGPAALY…
XP_020505943.1	MFSFLRKVRDPPPENIHISCLPPSIPTDQEPEQTGGIGDVVEEKAVIQTTHTHRVTPPSVFLQKQNNEPVSSTYFDQRVPVPDDHGERGISLRKLWAFTGPGFLMSIAYLDPGNIESDLQSGAKAGFKLLWVLLGATIIGLLLQRLAARLGVVTGMHLAEVCNRQYHTVPRIILWLMVELAIIGSDMQEVIGCAIAFSLLSAGRIPLWGGVLITIIDTFVFLFLDKYGLRKLEAFFGVLITVMAITFGYEYVTVSPDQGEVLKGMFVPYCEGCGPVQMGQAVGIVGAVIMPHNIYLHSALVKSREVDRTNKKEVREANKYFFIESTVALFLSFLINVFVVAVFAEAFYGRTNQEVYTVCNETGSPHSHLFPQDNQTLTVDIYKGGVVLGCFFGPAALYI…
XP_029136309.1	MFSFLRKVRDPPPENIHISCLPPSIPTDQEPEQTGGIAGDVVEEKAVIQTTHTHRVTPPSVFLQKQNNEPVSSTYFDQRVPVPDDHGERGISLRKLWAFTGPGFLMSIAYLDPGNIESDLQSGAKAGFKLLWVLLGATIIGLLLQRLAARLGVVTGMHLAEVCNRQYHTVPRIILWLMVELAIIGSDMQEVIGCAIAFSLLSAGRIPLWGGVLITIIDTFVFLFLDKYGLRKLEAFFGVLITVMAITFGYEYVTVSPDQGEVLKGMFVPYCEGCGPVQMGQAVGIVGAVIMPHNIYLHSALVKSREVDRTNKKEVREANKYFFIESTVALFLSFLINVFVVAVFAEAFYGRTNQEVYTVCNETGSPHSHLFPQDNQTLTVDIYKGGVVLGCFFGPAALY…
XP_030278286.1	MKLFSFLRSGREPPAENIHISSLPPSVPTDPEPQQTGGQGEVEVLEEKSVIQTTQTHRGPAPSVFLQKQDNDPVSGTYFDQRVPVPEEDGEKCFSLRKLWAFTGPGFLMSIAYLDPGNIESDLQSGAKAGFKLLWVLLGATIIGLLLQRLAARLGVVTGMHLAEVCNRQYRTVPRIILWLMVELAIIGSDMQEVIGCAIAFSLLSSGRIPLWGGVLITIIDTFFFLFLDKYGLRKLEAFFGLLITIMAITFGYEYVRVSPDQGELLKGMFVPYCEGCGPAQLTQAVGIIGAVIMPHNIYLHSALVKSREVDRSNKKDVKEANKYFFIEASMALFVSFLINVFVVAVFAEAFYGQTNEEVYNVCNQTGSPHLDLFPLNNETLQVDIYKGGVVLGCFFGPA…
AEC05335.1	MAPGTSCARCQADDLVEEKAVIQTTHTHRVSAPSVFLQKHNNEPVSSTYFDQRVPVPEEDSEWGISLRKLWAFTGPGFLMSIAYLDPGNIESDLQSGAKAGFKLLWVLLGATIIGLLLQRLAARLGVVTGMHLAEVCNRQYRTVPRVILWLMVELAIIGSDMQEVIGCAIAFNLLSSGRIPLWAGVLITIIDTFVFLFLDKYGLRKLEAFFGVLITIMAITFGYEYVTVRPDQGELLKGMFVPYCEGCGPVQLAQAVGIVGAVIMPHNIYLHSALVKSREVDRSNRKEVKEANKYFFIEATIALFVSFLINVFVVAVFAEAFYGRTNEEVHTVCNQSGSPHSSLFPLNNETLEVDIYKGGVVLGCFFGPAALYIWAVGILAAGQSSTMTGTYSGQFVME…
XP_029912416.1	MFSFLSSDRSPPPESIHISSLPPSIPTDHEPGQTEGEGDDMAREKEVIQTTHTHQVASSPSVFLQAHGETVSSTYFDQRVPVPEDDSKMGFSFRKLWAFTGPGFLMSIAYLDPGNIESDLQSGAKAGFKLLWVLLGATIIGLLLQRLAARLGVVTGMHLAEVCNRQYHTVPRILLWLMVELAIIGSDMQEVIGCAIAFNLLSSGRIPLWGGVLITIVDTFVFLFLDKYGLRKLEAFFGLLITIMAITFGYEYVTVRPDQGQLLKGMFVPYCEGCGPVQLEQAVGIVGAVIMPHNIYLHSALVKSREVDRSSKREVKEANKYFFIESTVALFVSFIINVFVVAVFAEAFYGRTNIEVYNVCNETGSPHSNLFPLDNETLQVDIYKGGVVLGCFFGPAALY…
AWP10060.1	MFKYRIRMFFNELKVLVFMRSDSRQPGPDADRRSAAAMRGLGMGGCGWPPFVDCRPRDDDEEYYGSDPRPRSLAFEDKEPKLPVGLDAVSLASTASSLRTPQCRICFQGPEQGELLSPCRCDGSVRCTHQPCLIRWISERGSWSCELCYFKYQVLAISTKNPLQWQAISLTVIEKVQIAAIILGSLFLIASISWLIWSSLSPSAKWQRQDLLFQICYGMYGFMDIVCIGLIIHEGSSVYRIFKRWQAVNQQWKVLNYEKSKDLGDPLSSSKTGARGSRGNPHGLASSSGGRQSRRLRTILNHHCGYTILHILSQLRPNDPRISAAANREVVMRVTTESCEELSDARSINRHDTLEDFSSRFVRQKEARCSFSIIKETDETRFLEQIAGRCPRISRKQNT…
XP_019959803.1	MLSFLRSVRDPTPESIHISSLPPSLPDYQEAGRTAAPAPDVSAERECVSVIQTTHTHRGSAPYLFLQRQNNDPVSTTYFNQKVPVPDNDSETSFSLRKLWAFTGPGFLMSIAYLDPGNIESDLQSGAKAGFKLLWVLLGATIIGLLLQRLAARLGVVTGMHLAEVCNRQYHKVPRIILWLMVELAIIGSDMQEVIGCAIAFNLLSSGRIPLWGGVLITIVDTFVFLFLDKYGLRKLEAFFGLLITVMAITFGYEYVTVRPDQGQLLTGMFVPYCQGCGPVQMTQAVGIVGAVIMPHNIYLHSALVKSREVDRSNKKDVREANKYFFIESTVALFVSFLINVFVVAVFAEAFYDRTNMEVYNVCNHSGSPHSHLFPLDNQTLEVDIFKGGVVLGCFFGPV…
XP_027867389.1	MFSFLRSGRNPPPENIHISSLPPSIPLDPEPDLPGQQDDSVKKQEKAIIQTTHTHRGSSTPSVFLQNRSNEPAPTTYFEQRVSVPEEDTERLFSLRKLWAFTGPGFLMSIAYLDPGNIESDLQSGAKAGFKLLWVLLLATIIGLLLQRLAARLGVVTGLHLAEVCNRQYPTVPRILLWLMVELAIIGSDMQEVIGCAIAFNLLSSDRIPLWAGVLITITDTFFFLFLDKYGLRRLEAFFGFLITIMAVTFGYEYVTVAPDQGQLLKGMFVPYCEGCGAVQLTQAVGVVGAVIMPHNIYLHSALVKSREVDRSKKKEVKEANKYFFIESAIALFVSFLINVFVVAIFAEEFYQRSNIEVNKVCNQSSISHSDLFPPDNKTLEVDIYKGGVVLGCFFGPAT…
XP_023197144.1	MFSFLRSGRNPPPENIHISSLPPSIPLDPEPDLPGQQDDSVKTQEKAIIQTTHTHRGSSTPSVFLQNRSNEPAPTTYFEQRVPVPEEDTERLFSLRKLWAFTGPGFLMSIAYLDPGNIESDLQSGAKAGFKLLWVLLLATIIGLLLQRLAARLGVVTGLHLAEVCNRQYPTVPRILLWLMVELAIIGSDMQEVIGCAIAFNLLSSHRIPLWAGVLITIIDTFFFLFLDKYGLRRLEAFFGFLITIMAITFGYEYVTVAPDQGQLLKGMFVPYCEGCGAVQLTQAVGVVGAVIMPHNIYLHSALVKSREVDRSKKKEVKEANKYFFIESAIALFVSFLINVFVVAIFAEEFYQRSNIEVNKVCNQSSISHSDLFPPDNKTLEVDIYKGGVVLGCFFGPAT…
XP_027867388.1	MKSVFSRLRVFVGFRFVCAVIFILGFKSSLIAGLLPGRNPPPENIHISSLPPSIPLDPEPDLPGQQDDSVKKQEKAIIQTTHTHRGSSTPSVFLQNRSNEPAPTTYFEQRVSVPEEDTERLFSLRKLWAFTGPGFLMSIAYLDPGNIESDLQSGAKAGFKLLWVLLLATIIGLLLQRLAARLGVVTGLHLAEVCNRQYPTVPRILLWLMVELAIIGSDMQEVIGCAIAFNLLSSDRIPLWAGVLITITDTFFFLFLDKYGLRRLEAFFGFLITIMAVTFGYEYVTVAPDQGQLLKGMFVPYCEGCGAVQLTQAVGVVGAVIMPHNIYLHSALVKSREVDRSKKKEVKEANKYFFIESAIALFVSFLINVFVVAIFAEEFYQRSNIEVNKVCNQSSISHS…
XP_023197140.1	MKSVFSRLRIFVGFRFVCAVIFILGFKSSLITGLLPGRNPPPENIHISSLPPSIPLDPEPDLPGQQDDSVKTQEKAIIQTTHTHRGSSTPSVFLQNRSNEPAPTTYFEQRVPVPEEDTERLFSLRKLWAFTGPGFLMSIAYLDPGNIESDLQSGAKAGFKLLWVLLLATIIGLLLQRLAARLGVVTGLHLAEVCNRQYPTVPRILLWLMVELAIIGSDMQEVIGCAIAFNLLSSHRIPLWAGVLITIIDTFFFLFLDKYGLRRLEAFFGFLITIMAITFGYEYVTVAPDQGQLLKGMFVPYCEGCGAVQLTQAVGVVGAVIMPHNIYLHSALVKSREVDRSKKKEVKEANKYFFIESAIALFVSFLINVFVVAIFAEEFYQRSNIEVNKVCNQSSISHS…
PWA29444.1	MFSFLRSGRNPPPENIHISSLPPSIPLDPEPDLPGQQDDSVKNQEKAVIQTTHTYRGSSTPSVFLQNRSNEPAPTTYFEQRVPVPEEDTERLFSLRKLWAFTGPGFLMSIAYLDPGNIESDLQSGAKAGFKLLWVLLLATVIGLLLQRLAARLGVVTGLHLAENSSGLADFSMFSMKVPRILLWLMVELAIIGSDMQEVIGCAIAFNLLSSQRIPLWTGVLITIIDTFFFLFLDKYGLRRLEAFFGFLITIMAITFGYEYVTVAPDQGQLLKGMFVPYCEGCGAVQLTQAVGVVGAVIMPHNIYLHSALVKSREVDRSKKKEVKEANKYFFIESAIALFVSFLINVFVVAVFAEEFYQRSNIEVSNVCNQSSIPHSDLFPVDNKTLEVDIYKGGVVLGC…
XP_007566956.1	MFSFLRSGRNPPAENIHISSLPPSIPLDPEPDPPGQQEDSVKNQEKAVIQTTYTHRGSSAPSVFLQNRSNEPAPATYFEQRVPVPDEDTERLFSLRKLWAFTGPGFLMSIAYLDPGNIESDLQSGAKAGFKLLWVLLLATIIGLLLQRLAARLGVVTGMHLAEVCNRQYPTVPRILLWLMVELAIIGSDMQEVIGCAIAFNLLSNHRIPLWAGVLITIIDTFFFLFLDKYGLRRLEAFFGLLITIMAITFGYEYVMVAPDQGQLLKGMFVPYCEGCGPVQLTQAVGVVGAVIMPHNIYLHSALVKSREVDRSKKKEIKEANKYFFIESAIALFVSFLINVFVVAVFAEAFYQRSNIEVYNVCNQSSIPHSNLFPLDNKTLEVDIFKGGVVLGCFFGPAA…
XP_014915204.1	MSGEFSKLLLYLRRADSDTTGRRGGTPRQRVDHFTGGSFPARFYSWPVSNFAQLKMFSFLRSGRNPPAENIHISSLPPSIPLDPEPDPPGQQEDSVKNQEKAVIQTTYTHRGSSAPSVFLQNRSNEPAPATYFEQRVPVPDEDTERLFSLRKLWAFTGPGFLMSIAYLDPGNIESDLQSGAKAGFKLLWVLLLATIIGLLLQRLAARLGVVTGMHLAEVCNRQYPTVPRILLWLMVELAIIGSDMQEVIGCAIAFNLLSNHRIPLWAGVLITIIDTFFFLFLDKYGLRRLEAFFGLLITIMAITFGYEYVMVAPDQGQLLKGMFVPYCEGCGPVQLTQAVGVVGAVIMPHNIYLHSALVKSREVDRSKKKEIKEANKYFFIESAIALFVSFLINVFVVA…
XP_014847385.1	MFSFLRSGRNPPAENIHISSLPPSIPLDPEPDPPGQQEDSVKNQEKAVIQTTYTHRGSSAPSVFLQNRSNEPAPTTYFEQRVPVPDEDTEKLFSLRKLWAFTGPGFLMSIAYLDPGNIESDLQSGAKAGFKLLWVLLLATIIGLLLQRLAARLGVVTGMHLAEVCNRQYPTVPRILLWLMVELAIIGSDMQEVIGCAIAFNLLSNHRIPLWAGVLITIIDTFFFLFMDKYGLRRLEAFFGLLITIMAITFGYEYVMVAPDQGQLLKGMFVPYCEGCGPVQLTQAVGVVGAVIMPHNIYLHSALVKSREVDRSKKKEIKEANKYFFIESAIALFVSFLINVFVVAVFAEAFYQRSNIEVNNVCNQSSIPHSNLFPLDNKTLEVDIFKGGVVLGCFFGPAA…
XP_015236580.1	MAYHPAGGFKSCLITCLLPVRNPPPENIHISSLPPSVPLDQESEPSGQQDAPYDVSAEDSVQNQEKAVIQTTHTHRGLYAPSVFLQNHSNEPPPSTYFEQRVPVPEEDNERLFSLRKLWAFTGPGFLMSIAYLDPGNIESDLQSGAKAGFKLLWVLLLATIIGLLLQRLAARLGVVTGMHLAEVCHRQYPTVPRIILWLMVELAIIGSDMQEVIGCAIAFSLLSSNRIPLWAGVLITIVDTFVFLFLDKYSLRRLEAFFGFLITIMAITFGYEYVTVAPDQGQLLKGMFVPYCEGCGPVQLTQAVGIVGAVIMPHNIYLHSALVKSREVDRSKKKEVKEANKYFFIESAIALFVSFLINVFVVAVFAEAFYQRSNIEVFNTCNQSGSYQPDLFPLNNET…
XP_012724733.2	MFSFLRSARNPPPENIYISSLPPSVPLDPDPEPEPQLSGQLEQEDSGKNQEKAVIQTTHTHRGSSAPSVFLQNHSNDPVSSTYFEQRVAIPEEDTERAFSLRKLWAFTGPGFLMSIAYLDPGNIESDLQSGAKAGFKLLWVLLVATIIGLLLQRLAARLGVVTGMHLAEVCHRQYPTVPRIILWLMVELAIIGSDMQEVIGCAIAFNLLSSGRIPLWAGVLITLIDTFFFLFLDKYGLRRLEAFFGFLITIMAITFGYEYVTVAPDQGQLLKGMFVPYCDVTVAPDQGQLLKGMFVPYCEGCGPVQLTQAVGVVGAVIMPHNIYLHSALVKSREVDRAKKKDVREANKYFFIESAIALFVSFLINVFVVAIFAEAFYQRSNIEVYNVCNQSGSPNSHLF…
XP_029995041.1	MFSFLRSVKNPAPENIHISSLPPSVPTDQEPEQNRGHADTVEEKPVIQTTHTHRFASSSSVFLQRQNEPVATTYFDQRIPIPEQESEGWFSFRKLWAFTGPGFLMSIAYLDPGNIESDLQSGAKAGFKLLWVLLGATIIGLLLQRLAARLGVVTGMHLAEVCNRQYHTVPRIILWLMVELAIIGSDMQEVIGCAIAFNLLSSGRIPLWGGVLITIIDTFVFLFLDKYGLRKLEAFFGFLITIMAITFGYEYVTVGPDQGDLLKGMFIPYCEGCGSPQLLQAVGIVGAVIMPHNIYLHSALVKSREVDRSNKREVKDANKYFFIESAIALFVSFLINVFVVTVFAEAFYEKTNIEVYSVCNESGSPHSHLFPLNNETLEVDIYRGGVVLGCFFGPAALYI…
XP_029995040.1	MFSFLRSVKNPAPENIHISSLPPSVPTDQEPEQNRGHEADTVEEKPVIQTTHTHRFASSSSVFLQRQNEPVATTYFDQRIPIPEQESEGWFSFRKLWAFTGPGFLMSIAYLDPGNIESDLQSGAKAGFKLLWVLLGATIIGLLLQRLAARLGVVTGMHLAEVCNRQYHTVPRIILWLMVELAIIGSDMQEVIGCAIAFNLLSSGRIPLWGGVLITIIDTFVFLFLDKYGLRKLEAFFGFLITIMAITFGYEYVTVGPDQGDLLKGMFIPYCEGCGSPQLLQAVGIVGAVIMPHNIYLHSALVKSREVDRSNKREVKDANKYFFIESAIALFVSFLINVFVVTVFAEAFYEKTNIEVYSVCNESGSPHSHLFPLNNETLEVDIYRGGVVLGCFFGPAALY…
XP_027144739.1	MIRFLRSVREPPQENIHISSLPPSVPTDPEPQQNGARAGDRAEERAVIQTTHTHRVSTPSVFLQKQNDETASSTYFDQRVPVPEEGSESCFSLRKLWAFTGPGFLMSIAYLDPGNIESDLQSGAKAGFKLLWVLLGATIIGLLLQRLAARLGVVTGMHLAEVCKQQYHTVPRVILWLMVELAIIGSDMQEVIGCAIAFNLLSGGRIKLWAGVLITIIDTFVFLFLDKYGRRKITYFGGLTMHARSFPVFQYVTVSPDQGELLKGMFVPYCEGCGPVQLGQAVGIVGAVIMPHNIYLHSALVKSREVDRSNKKEVKEANKYFLIEATIALFVSFLINVFVVAVFAEAFYDRTNEEVYTVCNQSGTPHLDLFPLNNETLQVDIYRGGVVLGCFFGPAALYI…
TMS15859.1	MIRFLRSVREPPQENIHISSLPPSVPTDQEPQQNGARAGDRAEERAVIQTTHTHRVSTPSVFLQKQNDETASSTYFDQRVPVPEEGSESCFSLRKLWAFTGPGFLMSIAYLDPGNIESDLQSGAKAGFKLLWVLLGATIIGLLLQRLAARLGVVTGMHLAEVCKQQYHTVPRVILWLMVELAIIGSDMQEVIGCAIAFNLLSGGRIKLWAGVLITIIDTFVFLFLDKYGLRKLEAFFGFLITIMAITFGYEYVTVSPDQGELLKGMFVPYCEGCGPVQLGQAVGIVGAVIMPHNIYLHSALVKATIALFVSFLINVFVVAVFAEAFYDRTNEEVYTVCNQSGTPHLDLFPLNNETLQVDIYRGGVVLGCFFGPAALYIWAMGILAAGQSSTMTGTYSGQ…
XP_021421646.1	MKRFSSSKFVSFLTTDRTPHPENIHISSLPPSIPTDQEPTHGEGDMAQGKAVETTQTQRGAPSVFPEGQNGGTDVSSTYFHHKVPIPDDDSQMWFSFRKLWAFTGPGFLMSIAYLDPGNIESDLQSGAKAGFKLLWVLLGATIIGLLLQRLAARLGVVTGMHLAEVCNRQYPTVPRIVLWLMVELAIIGSDMQEVIGCAIAFNLLSSGRIPLWGGVLITIIDTFVFLFLDKYGLRKLEAFFGVLITIMAITFGYEYVTVRPDQGELLKGMFMPYCEGCGPVQLEQAVGIVGAVIMPHNIYLHSALVKSRQIDRSSKKELKEANKYFFIESTIALFLSFLINVFVVAVFAEAVYGRTNIEVHDICNATGILHLDLFPLNNETLQVDIYKGGVVLGCIFGP…
XP_024239799.1	MKRFSSSKCVSFLTTERTPHPENIHISSLPPSIPIDQEPTHGEGDMAQGKAVETTQTQRGAPSVFPEGQNGGTDVSSTYFHHKVPIPDDDSQMWFSFRKLWAFTGPGFLMSIAYLDPGNIESDLQSGAKAGFKLLWVLLGATIIGLLLQRLAARLGVVTGMHLAEVCNRQYPTVPRIVLWLMVELAIIGSDMQEVIGCAIAFNLLSSGRIPLWGGVLITIIDTFVFLFLDKYGLRKLEAFFGVLITIMAITFGYEYVTVRPDQGELLKGMFMPYCEGCGPVQLEQAVGIVGAVIMPHNIYLHSALVKSRQIDRSSKKELKEANKYFFIESTIALFLSFLINVFVVAVFAEAVYGRTNIEVHDICNATGILHLDLFPLNNETLQVDIYKGGVVLGCIFGP…
XP_020315028.1	MKRFSSSKCVSFLTTDRTPHPENIHISSLPPSIPIDQEPMHGEGDMAQGKAVETTQTQRGASSVFPEGQNGGTDVSSTYFHHKVPIPDDDSQMWFSFRKLWAFTGPGFLMSIAYLDPGNIESDLQSGAKAGFKLLWVLLGATIIGLLLQRLAARLGVVTGMHLAEVCNRQYPTVPRIVLWLMVELAIIGSDMQEVIGCAIAFNLLSSGRIPLWGGVLITIIDTFVFLFLDKYGLRKLEAFFGVLITIMAITFGYEYVTVRPDQGELLKGMFMPYCEGCGPVQLEQAVGIVGAVIMPHNIYLHSALVKSRQIDRSSKKELKEANKYFFIESTIALFLSFLINVFVVAVFAEAVYGRTNIEVHDICNATGILHLDLFPLNNETLQVDIYKGGVVLGCIFGP…
XP_029478422.1	MKRFSSSKCVSFLTTDRTPHPENIHISSLPPSVPTDQEPTHGEGDMAQGKAVETTQTQRGAPSVFPEGQNGGTDVSSTYFHHKVPIPDDDSQTWFSFRKLWAFTGPGFLMSIAYLDPGNIESDLQSGAKAGFKLLWVLLGATIIGLLLQRLAARLGVVTGMHLAEVCNRQYPTVPRIVLWLMVELAIIGSDMQEVIGCAIAFNLLSSGRIPLWGGVLITIIDTFVFLFLDKYGLRKLEAFFGVLITIMAITFGYEYVTVRPDQGELLKGMFMPYCEGCGPVQLEQAVGIVGAVIMPHNIYLHSALVKSRQIDRSSKKELKEANKYFFIESTIALFLSFLINVFVVAVFAEAVYGRTNIEVHDICNATGILHLDLFPLNNETLQVDIYKGGVVLGCIFGP…
XP_013991433.1	MKRFSSSKMLSFLTSDRTPHPGNIHISSLPPSIPTDQEPTHGEDMAQGKGVETTQTQRGAPSVFPEGQNGGTDLSSTYFHHKVPIPDDDSQMWFSFRKLWAFTGPGFLMSIAYLDPGNIESDLQSGAKAGFKLLWVLLAATIIGLLLQRLAARLGVVTGMHLAEVCNRQYPTVPRIVLWLMVELAIIGSDMQEVIGCAIAFNLLSSGRIPLWGGVLITIIDTFVFLFLDKYGLRKLEAFFGVLITIMAITFGYEYVMVRPDQGELLKGMFMPYCEGCGPVQLEQAVGIVGAVIMPHNIYLHSALVKSRQIDRSSKKELKEANKYFFIESTIALFLSFLINVFVVAVFAEAVYGRTNIEVHDICNATGILHLDLFPLNNETLQVDIYKGGVVLGCIFGPA…
XP_013991432.1	MKRFSSSKMLSFLTSDRTPHPGNIHISSLPPSIPTDQEPTHGEEDMAQGKGVETTQTQRGAPSVFPEGQNGGTDLSSTYFHHKVPIPDDDSQMWFSFRKLWAFTGPGFLMSIAYLDPGNIESDLQSGAKAGFKLLWVLLAATIIGLLLQRLAARLGVVTGMHLAEVCNRQYPTVPRIVLWLMVELAIIGSDMQEVIGCAIAFNLLSSGRIPLWGGVLITIIDTFVFLFLDKYGLRKLEAFFGVLITIMAITFGYEYVMVRPDQGELLKGMFMPYCEGCGPVQLEQAVGIVGAVIMPHNIYLHSALVKSRQIDRSSKKELKEANKYFFIESTIALFLSFLINVFVVAVFAEAVYGRTNIEVHDICNATGILHLDLFPLNNETLQVDIYKGGVVLGCIFGP…
XP_029578491.1	MKRFSSSKMLSFLTTDRTPHPGNIHISSLPPSIPTDQEPTHGEDMAQGKGVETTQTQRGAPSVFPEGQNGGTDLSSTYFHHKVPIPDDDSQMWFSFRKLWAFTGPGFLMSIAYLDPGNIESDLQSGAKAGFKLLWVLLGATIIGLLLQRLAARLGVVTGMHLAEVCNRQYPTVPRIVLWLMVELAIIGSDMQEVIGCAIAFNLLSSGRIPLWGGVLITIIDTFVFLFLDKYGLRKLEAFFGVLITIMAITFGYEYVMVRPDQGELLKGMFMPYCEGCGPVQLEQAVGIVGAVIMPHNIYLHSALVKSRQIDRSSKKELKEANKYFFIESTIALFLSFLINVFVVAVFAEAVYGRTNIEVHDICNATGILHLDLFPLNNETLQVDIYKGGVVLGCIFGPA…
XP_029578490.1	MKRFSSSKMLSFLTTDRTPHPGNIHISSLPPSIPTDQEPTHGEEDMAQGKGVETTQTQRGAPSVFPEGQNGGTDLSSTYFHHKVPIPDDDSQMWFSFRKLWAFTGPGFLMSIAYLDPGNIESDLQSGAKAGFKLLWVLLGATIIGLLLQRLAARLGVVTGMHLAEVCNRQYPTVPRIVLWLMVELAIIGSDMQEVIGCAIAFNLLSSGRIPLWGGVLITIIDTFVFLFLDKYGLRKLEAFFGVLITIMAITFGYEYVMVRPDQGELLKGMFMPYCEGCGPVQLEQAVGIVGAVIMPHNIYLHSALVKSRQIDRSSKKELKEANKYFFIESTIALFLSFLINVFVVAVFAEAVYGRTNIEVHDICNATGILHLDLFPLNNETLQVDIYKGGVVLGCIFGP…
XP_023862122.1	MKRFSSSKMLSFLTTDRTPHPENLHISSLPPSIPTDQEPTHGEEMAQGEAVETTQTQRGAPSVFQEGQNGGTDVSSTYFHHKVPIPDDDSQMWFSFRKLWAFTGPGFLMSIAYLDPGNIESDLQSGAKAGFKLLWVLLGATVIGLLLQRLAARLGVVTGMHLAEVCNRQYPTVPRIILWLMVELAIIGSDMQEVIGCAIAFNLLSSGRIPLWGGVLITIIDTFVFLFLDKYGLRKLEAFFGVLITIMAITFGYEYVTVRPDQGELLQGMFMPYCEGCGPVQLEQAVGIVGAVIMPHNIYLHSALVKSRQIDRSSKKELKEANKYFFIESTIALFLSFLINVFVVAVFAEAVYGRTNIEVHDICNATGSLHLDLFPMNNETLQVDIYKGGVVLGCIFGPA…
XP_023862121.1	MKRFSSSKMLSFLTTDRTPHPENLHISSLPPSIPTDQEPTHGEEEMAQGEAVETTQTQRGAPSVFQEGQNGGTDVSSTYFHHKVPIPDDDSQMWFSFRKLWAFTGPGFLMSIAYLDPGNIESDLQSGAKAGFKLLWVLLGATVIGLLLQRLAARLGVVTGMHLAEVCNRQYPTVPRIILWLMVELAIIGSDMQEVIGCAIAFNLLSSGRIPLWGGVLITIIDTFVFLFLDKYGLRKLEAFFGVLITIMAITFGYEYVTVRPDQGELLQGMFMPYCEGCGPVQLEQAVGIVGAVIMPHNIYLHSALVKSRQIDRSSKKELKEANKYFFIESTIALFLSFLINVFVVAVFAEAVYGRTNIEVHDICNATGSLHLDLFPMNNETLQVDIYKGGVVLGCIFGP…
XP_013991434.1	MAQGKGVETTQTQRGAPSVFPEGQNGGTDLSSTYFHHKVPIPDDDSQMWFSFRKLWAFTGPGFLMSIAYLDPGNIESDLQSGAKAGFKLLWVLLAATIIGLLLQRLAARLGVVTGMHLAEVCNRQYPTVPRIVLWLMVELAIIGSDMQEVIGCAIAFNLLSSGRIPLWGGVLITIIDTFVFLFLDKYGLRKLEAFFGVLITIMAITFGYEYVMVRPDQGELLKGMFMPYCEGCGPVQLEQAVGIVGAVIMPHNIYLHSALVKSRQIDRSSKKELKEANKYFFIESTIALFLSFLINVFVVAVFAEAVYGRTNIEVHDICNATGILHLDLFPLNNETLQVDIYKGGVVLGCIFGPAALYIWAVGILAAGQSSTMTGTYSGQFVMEGFLNLRWSRFSRVLL…
XP_023812708.1	MRSFLRSVRNPASENIHISSLPAGVPTDREPEEPTQQDEMVKTKRKAVIRTTHTQGVSTPSVFLQNNDNDLPPTTYFDQKVSVPEEDTARFFSLRKLWAFTGPGFLMSIAYLDPGNIESDLQSGAKAGFKLLWLLLSATIIGLLLQRLAARLGVVTGMHLAEVCHRQYRTVPRILLWLMVELAIIGSDMQEVIGCAIAFNLLSAGRIRLWAGVLITILDTFVFLFLDKYGLRRLEAFFGLLITIMAITFGCEYVMVAPDQGQLIKGMFLPYCEGCGPVQLTQAVGVIGAVIMPHNIYLHSALVKSREVDRSNKKEVKEANKYFFIESAIALFVSFLVNVFVVAIFAEAFYQRTNMEVYTVCNQSGTPHLDLFPLDNNTLEVDIYKGGVVLGCFFGPAAL…
XP_023812706.1	MFCLVADDLRSYPFLCQSPCIQSSYCLQTHHPPLLPPTGLQFSSAPYEMVKTKRKAVIRTTHTQGVSTPSVFLQNNDNDLPPTTYFDQKVSVPEEDTARFFSLRKLWAFTGPGFLMSIAYLDPGNIESDLQSGAKAGFKLLWLLLSATIIGLLLQRLAARLGVVTGMHLAEVCHRQYRTVPRILLWLMVELAIIGSDMQEVIGCAIAFNLLSAGRIRLWAGVLITILDTFVFLFLDKYGLRRLEAFFGLLITIMAITFGCEYVMVAPDQGQLIKGMFLPYCEGCGPVQLTQAVGVIGAVIMPHNIYLHSALVKSREVDRSNKKEVKEANKYFFIESAIALFVSFLVNVFVVAIFAEAFYQRTNMEVYTVCNQSGTPHLDLFPLDNNTLEVDIYKGGVVL…
XP_023812709.1	MVKTKRKAVIRTTHTQGVSTPSVFLQNNDNDLPPTTYFDQKVSVPEEDTARFFSLRKLWAFTGPGFLMSIAYLDPGNIESDLQSGAKAGFKLLWLLLSATIIGLLLQRLAARLGVVTGMHLAEVCHRQYRTVPRILLWLMVELAIIGSDMQEVIGCAIAFNLLSAGRIRLWAGVLITILDTFVFLFLDKYGLRRLEAFFGLLITIMAITFGCEYVMVAPDQGQLIKGMFLPYCEGCGPVQLTQAVGVIGAVIMPHNIYLHSALVKSREVDRSNKKEVKEANKYFFIESAIALFVSFLVNVFVVAIFAEAFYQRTNMEVYTVCNQSGTPHLDLFPLDNNTLEVDIYKGGVVLGCFFGPAALYIWAVGILAAGQSSTMTGTYSGQFVMEGFLNLRWSRFAR…
XP_024149783.1	MRSFLRSVRNLAPENIHISSLPPGVPTDQEPEETTQQDEMVKTKEKDVVRTTHTHRVSSPSVFLQNNDNDPPPATYFDQKIPVPEEDSARLFSLRKLWAFTGPGFLMSIAYLDPGNIESDLQSGAKAGFKLLWLLLCATIIGLLLQRLAARLGVVTGMHLAEVCHRQYRTVPRILLWLMVELAIIGSDMQEVIGCAIAFNLLSAGRIPLWAGVLITVLDTFVFLFLDKYGLRHLEAFFGLLITIMAITFGCEYVIVAPDQGQLLKGMFLPYCEGCGPVQLTQAVGVIGAVIMPHNIYLHSALVKSREVDRSSKKEVKEANKYFFIESAIALFVSFLVNVFVVAVFAEAFYQRTNMEVFTVCNESGTPHLDLFPLDNNTLEVDIYKGGVVLGCFFGPAAL…
RVE71090.1	MRSFLRSVRNSSPENIHISSLPPGVPTDQEPEETTQQDEMVKPKEKDVIRTTHTHRVSTPSVFHQNNDPPPTTYFDQKIPVPEEDTAKLFSLRKLWAFTGPGFLMSIAYLDPGNIESDLQSGAKAGFKLLWLLLCATVIGLLLQRLAARLGVVTGMHLAEVCHRQYRTVPRILLWLMVELAIIGSDMQEVIGCAIAFSLLSAGRIPLWAGVLITILDTFVFLFLDKYGLRHLEAFFGLLITIMAITFGCEYVIVAPDQGQLLKGMFLPYCEGCGPVQLTQAVGVIGAVIMPHNIYLHSALVKSREVDRSSKTEVKEANKYFFIESTIALFVSFLVNVFVVAVFAEAFFLRTNMEVFTVCNQSGTPHLDLFPQDNNTLEVDIFKGGVVLGCYFGPAALYI…
XP_008317217.1	MMKLFSFLSSARDATPENIHISSLPPSAPTFDQATVPEHDVSTEKALVQTTYTHRVSSPTVFLQNQDKDPVSDTYFDQRIPVPDEKSEGCISLRKLWAFTGPGFLMSIAYLDPGNIESDLQSGAKAGFKLLWVLLGATTIGLLLQRLAARLGVVTGMHLAEVCHRHYRTVPRIILWLMVELAIIGSDMQEVIGCAIAFSLLSNGRIPLWTGVLITIIDTFFFLFLDKYGLRKLEAFFGLLIAVMAITFGYEYVTVGPDQGELLKGMFVPYCQGCGPVQLAQAVGIVGAVIMPHNIYLHSALVKSREVDRSNKKEVREANKYVFIESTMALFISFLINVFVVAVFAEAFYQRTNIEVHNVCNQSGSPHSHLFPLNNETLEVDIYKGGVVLGCFFGPAALY…
XP_028309547.1	MISFLRSVRNSFRPQGENITPVPYNVPTDPVPQMNGGRAEDASERKAVIQTTHTHRGFTAPSVFPQNPNNEEFASTYFDQRVCVPEDDSKKCFSFRKLWAFTGPGFLMSIAYLDPGNIESDLQSGAKAGFKLLWVLLGATIIGLLLQRLAARLGVVTGMHLAEVCHRQYRTVPRIILWLMVELAIIGSDMQEVIGCAIAFNLLSSGRIPLWGGVLITIIDTFVFLFLDKYGLRKLEAFFGLLISIMAITFGYEYVTVRPDQGELLKGMFVPYCEDCGSTQLVQAVGIVGAVIMPHNIYLHSALVKSREVDRSNKKEVKEANKYFFIESTVALFISFLINVFVVAVFAEAFYKSTNMEVYNVCNQTGSPHSHLFPQNNETLEVDIYKGGVVLGCFFGPAA…
XP_029690273.1	MKLLPYLRSGRSETSANFHITPPSIPTYQEPPHDVGDDDAGGASVIRTTHTHIPSVFQQKPDDDAVNSTYFDQRILVPEDQNQSWFSLRKLWAFTGPGFLMSIAYLDPGNIESDLQSGAKAEFKLLWVLLGATVIGLLLQRLAARLGVVTGMHLAEVCNHHYPNVPRIILWLMVELAIIGSDMQEVIGCAIAFNLLSSGRIPLWGGVLITIIDTFFFLFLDKYGLRKLEAFFGLLITIMAITFGYEYVAVGPNQANLLKGMFVPYCEGCGPVQLAQAVGIVGAVIMPHNIYLHSALVKSREVDRSSRNEVKEANKYFFIEACLALFVSFLINVFVVAVFAEAFYGRTNSEVFTVCNQAGSPHSQLFPQNNDTLEVDIYKGGVLLGCFFGPAALYIWAVG…
TNM86567.1	MKLLPYLRSGRSETSENFHITPPSIPTHQEPPHDVGDDDAGGASVIRTTHTHIPSVFQQNPDDDAVNSTYFDQRILVPEDQNQSWFSLRKLWAFTGPGFLMSIAYLDPGNIESDLQSGAKAEFKRLAARLGVVTGMHLAEVCNHHYPNVPRIILWLMVELAIIGSDMQEVIGCAIAFNLLSSGRIPLWGGVLITIIDTFFFLFLDKYGLRKLEAFFGLLITIMAITFGYEYVAVGPNQANLLKGMFVPYCEGCGPVQLAQAVGIVGAVIMPHNIYLHSALVKSREVDRSSRNEVKEANKYFFIEACLALFVSFLINVFVVAVFAEAFYGRTNSEVFTVCNQTGSPHSQLFPQNNDTLEVDIYKGGVLLGCFFGPAALYIWAVGILAAGQSSTMTGTYSG…
XP_029975076.1	MFSFLTGGRPPAEDIPGGRPPAEDIHITPLPPGVPAEPDPQQPGAPGAPGDGLEEKEVIRTTHSHRGSSRTAVFLCSHGDEPAPAPATYFQQRVPVPEDRNTNRISLRRLWAFTGPGFLMSIAYLDPGNIESDLQSGAKAGFKLLWVLLGATAIGLLLQRLAARLGVVTGMHLAEVCHRHYRTVPRILLWLMVELAIIGSDMQEVIGCAIAFNLLSSGRIPLWGGVLITIMDTFVFLFLDKYGLRKLEAFFGLLITLMAVTFGYEYVTVGPDQGQLLKGMFVPYCEGCGPVQLTQAVGIVGAVIMPHNIYLHSALVKSREVDRSNRKEVKEANKYFFIESSMALFVSFLINVFVVAVFAEGFYGRTNQEVFHVCNQTGSPHSHLFPLNNHTLEVDIYKG…
XP_010873525.1	MAQEKADESDAAQTQQQPPSPLAQSGADVSSTYFNQQVPIPQDDRQVWFSFRKLWAFTGPGFLMSIAYLDPGNIESDLQSGAKAGYKLLWVLLGSTVIGLLLQRLAARLGVVTGMHLAEVCHQQYHAVPRIILWLMVELAIIGSDMQEVIGCAIAFNLLSSGRIPLWGGVLITIIDTFVFLFLDNYGLRKLETFFGLLITIMAVTFGYEYVMVRPDQGELLKGMFVPRCQGCGPSQMEQAVGIVGAVIMPHNIYLHSALVKSRQIDRSSAKEVKEANKYFFIESTIALFVSFLINVFVVAVFAEAFYGRTNMEVHDVCNATHGLHADLFPFNNETLQVDIYKGGVVLGCFFGPAALYIWAVGILAAGQSSTMTGTYSGQFVMEGFLNLRWSRFSRVLLT…
XP_029361616.1	MSIAYLDPGNIESDLQSGAKAGFKLLWVLLAATVIGLLLQRLAARLGVVTGMHLAEVCNRQYRTVPRIILWLMVELAIIGSDMQEVIGCAIAFNLLSSGRIPPWGGVLITIIDTFVFLFLDKYGLRKLEAFFGLLITIMAITFGYEYVVVSPDQGQLLMGMFVPSCQGCGPVQLSQAVGIVGAVIMPHNIYLHSALVKSREVDRTNRKEVKEANKYFFIESTIALFVSFLINVFVVAVFAEGFYKRTNVEVYNVCNQSGSPHSHLFPLDNETLEVDIYKGGVVLGCFFGPAALYIWAVGILAAGQSSTMTGTYSGQFVMEGFLNLRWSRFSRVVLTRSIAITPTLLVAVFQDVQHLTGMNDFLNVLQSMQLPFALIPILTFTSLPSLMNEFANGLVFKI…
XP_030208784.1	MKRFRGATAKLFSSRRADSKSHPENVHIPSLPPSVPSDQPPPHQADMYVCDGVSASAGERDVIQTHHTHAGPPPGFLQGSDATVASTYFDQRVPIPDDHSRMGFSLRKLWAFSGPGFLMSIAYLDPGNIESDLQSGAKAGFKLLWVLMGATFIGLLLQRLSSRLGVVTGMHLAEVCHRQYRTVPRVVLWLMVELAIIGSDMQEVIGCAIAFHLLSSGRIPLWGGVLITILDTFVFLFLDKYGLRKLEAFFGVLITVMAITFGYEYVTVRPDQGELLKGMFLPYCEGCGPVQLEQAVGIVGAVIMPHNIYLHSALVKSREVDRSSKKDVKEANKYFFIESSMALFVSFLINVFVVAVFAEAFYGRTNAEVHDVCNATGSPHSHLFPVDNQTLQVDIYKGG…
XP_020797687.1	MRLAPNGRTEEWTKETGGNLVEDKGVIQSPVSSVFLQNQNEPIHSTYFDEKIPVPEESSSSVFSLRKLWAFTGPGFLMSIAYLDPGNIESDLQSGAKAGFKLLWVLLGATIIGLLLQRLAARLGVVTGMHLAEVCHRQYHTIPRVALWLMVELAIIGSDMQEVIGCAIAFNLLSSGRIPLWGGVLITIVDTFFFLFLDKYGLRKLEAFFGLLISVMAFTFGYEYVTVAPDQASVLHGMFVPSCDGCGSAQLLQAVGIVGAVIMPHNIYLHSALVKSREVDRSKKEEVKEANKYFFIESCLALFVSFIINVFVVSVFAEAFYGQTNLQVYSICNSSGSPHVDLFPLNNDTLEVDIYKGGVVLGCFFGPAALYIWAVGILAAGQSSTMTGTYSGQFVMEGF…
XP_019737467.1	MLSFLRPAGAGQLPPENVHISSLPSGVPAADEPRDADRQEGAVCGQEVVIRTGHTQRGAFLYGHDPGAASATYLEESVPVPQEDDEGGFSFRKLWAFTGPGFLMSIAYLDPGNIESDLQSGAKAGFKLLWVLLGATVVGLLLQRMSARLGAVTGMHLAQVCHRHYRTVPRVLLWLMVELAIVGSDMQEVIGCAIAFNLLSSGRIPLWGGVLITVVDTFAFLFLDKYGLRRLEAFFALLIAVMAVAFGYEYVTVRPDQSQLLMGMFVPSCQGCGAVQLGQAVGIVGAVIMPHNIYLHSALVKSREVDRSSKKRISEANKYFFVESCAALLVSFIINVFVVAVFAEAFYERTNAQVNHVCNRTGSPHSHLFPLDNRTLEVDIYKGGAVLGCFFGPAALYVW…
XP_019737478.1	MLSFLRPAGAGQLPPENVHISSLPSGVPAADEPPEGAVCGQEVVIRTGHTQRGAFLYGHDPGAASATYLEESVPVPQEDDEGGFSFRKLWAFTGPGFLMSIAYLDPGNIESDLQSGAKAGFKLLWVLLGATVVGLLLQRMSARLGAVTGMHLAQVCHRHYRTVPRVLLWLMVELAIVGSDMQEVIGCAIAFNLLSSGRIPLWGGVLITVVDTFAFLFLDKYGLRRLEAFFALLIAVMAVAFGYEYVTVRPDQSQLLMGMFVPSCQGCGAVQLGQAVGIVGAVIMPHNIYLHSALVKSREVDRSSKKRISEANKYFFVESCAALLVSFIINVFVVAVFAEAFYERTNAQVNHVCNRTGSPHSHLFPLDNRTLEVDIYKGGAVLGCFFGPAALYVWAVGIL…
XP_014341279.1	MSIAYLDPGNIESDLQSGAVAGFKLLWVLLSATVLGLLLQRLAARLGVVTGMHLAEVCHRQYPKVPRIILWLMVELAIIGSDMQEVIGSAIAFNLLSAGRIPLWGGVLITIIDTFFFLFLDKYGLRKLEAFFGFLITIMALTFGYEYVTVKPDQGQLLKGMFVPMCQGCGSSQLQQAVGIVGAVIMPHNIYLHSALVKSRQINRSDKREVREANKYFFIEACVALFISFLINVFVVSVFAEAFYGQTNQEVHDICTNNSSPHSDLFPQNNETLEVDIYKGGVVLGCYFGPAALYIWAIGILAAGQSSTMTGTYSGQFVMEGFLNLSWSRFARVILTRSIAITPTLLVAVFQDVEHLTGMNDFLNVLQSLQLPFALIPILTFTSLRPLMNDFTNGIGWKI…
XP_020366394.1	MAPDQEKKELKEPQLESGASNIHLRYSTITPPASPDPTEENSQTYLDEKIPIPDDSSTRFSFRKLWAFTGPGFLMSIAYLDPGNIESDLQSGAVAGFKLLWILLTATIIGLLLQRLAARLGVVTGMHLAEVCHRQYPKFPRIVLWLMVELAIIGSDMQEVIGSAIAINLLTVGRIPLWGGVLITIVDTFVFLFLDKICYGLRKLEAFFGFLITVMAVTFGYEYVTVHPDQGQLLKGMFVPFCAGCGTRQLEQAVGIVGAVIMPHNIYLHSALVKSREVNRANKNEVKEANRYFFIEACMALFVSFLINVFVVSVFAQAFYGKTNAQVHNDCFNQSGPYSNLFPLNNQTFDVNIYKGGVVLGCYFGAAALYIWAIGILAAGQSSTMTGTYSGQFVMEGFL…
XP_007910552.1	MAPDQEKQEEADEAAESQGGANKIHTGYSTMTPPESPDPLDQSYQTYLDEKVPIPDDNSAWFSFRKLWAFTGPGFLMSIAYLDPGNIESDLQSGAVAGFKLLWVLLSATIIGLLLQRLAARLGVVTGMHLAEICHKQYPKFPRIILWLMVELAIIGSDMQEVIGSAIAFNLLSAGRIPLWAGVLITIVDTFVFLFMDKYGLRRLEAFFGFLITVMAFTFGYEYVTVRPDQGALLKGMFVPYCQGCGPPQLEQAVGIVGAVIMPHNIYLHSALVKSRDVNRANRNAVKEANRYFFIETCIALFISFLINVFVVAVFAEAFYKKTNNEVRDMCSNNSSPHSSLFPANNETMDVNIYKGGVVLGCFFGPAALYIWAIGILAAGQSSTMTGTYSGQFVMEGFL…
XP_006870198.1	MGPGFLMSIAYLDPGNIESDLQSGAVAGFKLLWVLLLTTIVGLLLQRLAVRLGVVSGLHLAEVCHKQYPKIPRIILWLMVELAIIGSDMQEVIGSAIAINLLSVGRVPLWAGVLITIADTFVFLFLDKYGLRKLEAFFGFLITIMALTFGYEYVTVKPSQSQVLTGMFVPSCSGCGILQVVQAVGIVGANLSPHNIYLHSALVKSRQINRANKQEVREANKYFVIESCLALFIAFIINVFVISVFAEAFFGETNNQVVQVCKNSSFPRSDDLFPDDNLTLAVDIYKGGLMLGCYFGPAALYIWAVGILAAGQSSTMTGTYSGQFVMELPFALIPILTFTSLRPVMSDFANGIGWRVAGGILVVVICSINMYLVVSYVQGLGQMVLYVVAALISVAYLSF…
XP_010568063.1	MSRSGPAMASLEPGLTGSLNQGQAQTYGTVGSPVPLQHPGTRDQTYLDELISIPKGGGPGFSFRKLWAFTGPGFLMSIAYLDPGNVESDLQCGAVAGFKLLWVLLWATVLGLLCQRLAIRLGVVTGKDLGEICYLYYPKVPRVLLWLMIEIAIIGSDMQEVIGTAIAFSLLSAGRIPLWGGVLITIVDTLFFLFLDKYGLRKLEAFFGLLITIMALTFGYEYVVVRPGQVEVLKGIFLPYCPGCGREELLQAVGIVGAIIMPHNIFLHSSLVKTREIDRSKKEAVREANMYFLTESCVALFVSFLINLFVMAVFGEAFYRQRNEDVHNKCVNSSISQYASIFPNNNETVSVDIYQGGVILGCYFGAVALYIWAIGILAAGQSSTMTGTYAGQFVMEGFL…
XP_011579211.1	MSRSGPAMASLEPGLTGSLNRGQAQTYGTVGSPVPPQHPGTRDQTYLDELISIPKGGGPGFSFRKLWAFTGPGFLMSIAYLDPGNVESDLQCGAVAGFKLLWVLLWATVLGLLCQRLAIRLGVVTGKDLGEICYLYYPKVPRVLLWLMIEIAIIGSDMQEVIGTAIAFSLLSAGRIPLWGGVLITIVDTLFFLFLDKYGLRKLEAFFGLLIAIMALTFGYEYVVVRPGQVEVLKGIFLPYCPGCGREELLQAVGIVGAIIMPHNIFLHSSLVKTRDIDRSKKEAVREANMYFLTESCLALFVSFLINLFVMAVFGEAFYRQRNEDVHNKCVNSSISQYASIFPNNNETVSVDIYQGGVILGCYFGAVALYIWAIGILAAGQSSTMTGTYAGQFVMEGFL…
XP_009460453.1	MASLEPGLTGSLNRGQAQTYGTGESPVPPQRPGTQDQTYLDELISIPKGDGPGFSFRKLWAFTGPGFLMSIAYLDPGNVESDLQCGAVAGFKLLWVLLWATVLGLLCQRLAIRLGVVTGKDLAEICYLYYPKVPRVLLWLMIEIAIIGSDMQEVIGTAIAFSLLSAGRIPLWGGVLITIVDTLFFLFLDKYGLRKLEAFFGLLITIMALTFGYEYVVVRPGQVEVLKGIFLPYCPGCGREELLQAVGIVGAIIMPHNIFLHSSLVKTRAIDRSKKEAVQEANMYFLTESCVALFVSFLINLFVMAVFGEAFYHQRNEDVHNKCINSSISHYASIFPVNNETVSVDIYQGGVILGCYFGAVALYIWAIGILAAGQSSTMTGTYAGQFVMEGFLQLRWSRF…
KFQ94723.1	PVPPQRPGTQDQTYLDELISIPKGDGPGFSFRKLWAFTGPGFLMSIAYLDPGNVESDLQCGAVAGFKLLWVLLWATVLGLLCQRLAIRLGVVTGKDLAEICYLYYPKVPRVLLWLMIEIAIIGSDMQEVIGTAIAFSLLSAGRIPLWGGVLITIVDTLFFLFLDKYGLRKLEAFFGLLITIMALTFGYEYVVVRPGQVEVLKGIFLPYCPGCGREELLQAVGIVGAIIMPHNIFLHSSLVKTRAIDRSKKEAVQEANMYFLTESCVALFVSFLINLFVMAVFGEAFYHQRNEDVHNKCINSSISHYASIFPVNNETVSVDIYQGGVILGCYFGAVALYIWAIGILAAGQSSTMTGTYAGQFVMEGFLQLRWSRFARVLFTRSFAILPTIFVAAFKDVSH…
XP_026708864.1	MSRSGPAMASPEPGLTGSLNRGQAQTYGTSGSPMPPQRPGTQDQTYLDELISIPKGDGPGFSFRKLWAFTGPGFLMSIAYLDPGNVESDLQCGAVAGFKLLWVLLWATILGLLCQRLAIRLGVVTGKDLGEICYLYYPKVPRVLLWLMIEIAIIGSDMQEVIGTAIAFSLLSAGRIPLWGGVLITIVDTLFFLFLDKYGLRKLEAFFGFLITIMALTFGYEYVVVRPRQVEVLKGIFLPYCPGCGREELLQAVGIVGAIIMPHNIFLHSSLVKTRAIDRSKKEAVQEANMYFLTESCLALFISFLINLFVMSVFGEAFYHQRNEDVHNKCVNSSISHYAGIFPTNNETVSVDIYQGGVILGCYFGVVALYIWAIGILAAGQSSTMTGTYAGQFVMEGFL…
XP_009556270.1	MSRSGPATASLQPGLTGSLNQGQAQTYGTGQSPVPSWRPGTRDQTYLDELISIPKGDEPGFSFRKLWAFTGPGFLMSIAYLDPGNVESDLQCGAVAGFKLLWVLLWATVLGLLCQRLAIRLGVVTGKDLGEICYLYYPKVPRVLLWLMIEIAIIGSDMQEVIGTAIAFSLLSAGRIPLWGGVLITIVDTIFFLFLDKYGLRKLEAFFGLLITIMALTFGYEYVVVRPGQVEVLKGIFLPYCPGCGREELLQAVGIIGAIIMPHNIFLHSSLVKTRAIDRSKKEAVREANMYFLTESCLALFVSFLINLFVMAVFGEAFYRQRNEDVHNKCVNSSVSRYAGIFPTNNETVSVDIYQGGVILGCYFGMAALYIWAIGILAAGQSSTMTGTYAGQFVMEGFL…
KFO69707.1	PVPSWRPGTRDQTYLDELISIPKGDEPGFSFRKLWAFTGPGFLMSIAYLDPGNVESDLQCGAVAGFKLLWVLLWATVLGLLCQRLAIRLGVVTGKDLGEICYLYYPKVPRVLLWLMIEIAIIGSDMQEVIGTAIAFSLLSAGRIPLWGGVLITIVDTIFFLFLDKYGLRKLEAFFGLLITIMALTFGYEYVVVRPGQVEVLKGIFLPYCPGCGREELLQAVGIIGAIIMPHNIFLHSSLVKTRAIDRSKKEAVREANMYFLTESCLALFVSFLINLFVMAVFGEAFYRQRNEDVHNKCVNSSVSRYAGIFPTNNETVSVDIYQGGVILGCYFGMAALYIWAIGILAAGQSSTMTGTYAGQFVMEGFLQLRWSRFARVLFTRSFAILPTVFVAAFKDVSH…
XP_014809686.1	MSGSGPAMASLEPGLTGSLNRGQAQTYGTGGSPVPPQRPGTRDQTYLDELISIPKGSGPGFSFRKLWAFTGPGFLMSIAYLDPGNVESDLQCGAVAGFKLLWVLLWATVLGLLCQRLAIRLGVVTGKDLGEICYLYYPKVPRVLLWLMIEIAIIGSDMQEVIGTAIAFSLLSAGRIPLWGGVLITIVDTLFFLFLDKYGLCKLEAFFGLLITIMALTFGYEYVVVRPSQVEVLKGIFLPYCPGCGREELLQAVGIVGAIIMPHNIFLHSSLVKTRAIDRSKKEAVQEANMYFLTESCLALFISFLINLFVMAVFGEAFYRQRNEDVHNKCVNSSVSRYAGIFPLNNETVSVDIYQGGVILGCYFGAVALYIWAIGILAAGQSSTMTGTYAGQFVMEGFL…
XP_005154135.1	MASLEPGLTGSLNQGQAQTYGTSMSPVAPQHPGTLDQTYLDERISIPKGGGPGFSFRKLWAFTGPGFLMSIAYLDPGNVESDLQCGAVAGFKLLWVLLWATILGLLCQRLAIRLGVVTGKDLGEICYLYYPKVPRVLLWLMIEIAIIGSDMQEVIGTAIAFSLLSAGRIPLWGGVLITIVDTLFFLFLDKYGLRKLEAFFGLLITIMALTFGYEYVMVRPGQVEVLKGIFLPYCPGCGREELLQAVGIVGAIIMPHNIFLHSSLVKTRDIDRSKKEAVQEANMYFLTESCLALFISFLINLFVMAVFGEAFYHQRNEDVHNKCINSSVSRYANIFPTNNETVSVDIYQGGVILGCYFGAVALYIWAIGILAAGQSSTMTGTYAGQFVMEGFLQLRWSRF…
XP_030909085.1	MGLTGHGQVGPRGCQPGRLPLLSPWWAATSPPSLPRSPPLPPGLTGSLNQGQAQTYGTSMSPVAPQHPGTLDQTYLDERISIPKGGGPGFSFRKLWAFTGPGFLMSIAYLDPGNVESDLQCGAVAGFKLLWVLLWATILGLLCQRLAIRLGVVTGKDLGEICYLYYPKVPRVLLWLMIEIAIIGSDMQEVIGTAIAFSLLSAGRIPLWGGVLITIVDTLFFLFLDKYGLRKLEAFFGLLITIMALTFGYEYVMVRPGQVEVLKGIFLPYCPGCGREELLQAVGIVGAIIMPHNIFLHSSLVKTRDIDRSKKEAVQEANMYFLTESCLALFISFLINLFVMAVFGEAFYHQRNEDVHNKCINSSVSRYANIFPTNNETVSVDIYQGGVILGCYFGAVALY…
KQK84430.1	MSGSXPATASLEPGLTGSLNRGQAQTYGTGMRPVAPQRPGTLDQTYLDERISIPKGGGPGFSFRKLWAFTGPGFLMSIAYLDPGNVESDLQCGAVAGFKLLWVLLWATILGLLCQRLAIRLGVVTGKDLGEICYLYYPKVPRVLLWLMIEIAIIGSDMQEVIGTAIAFSLLSAGRIPLWGGVLITIVDTLFFLFLDKYGLRKLEAFFGLLITIMALTFGYEYVMVRPGQVEVLKGIFLPYCLGCGREELLQAVGIVGAIIMPHNIFLHSSLVKTRDIDRSKKEAVQEANMYFLTESCLALFISFLINLFVMAVFGEAFYHQRNEDVHNKCINSSVSHYASIFPINNETVSVDIYQGGVILGCYFGAVALYIWAVGILAAGQSSTMTGTYAGQFVMEGFL…
XP_030344355.1	MSGSGPATASLEPGLTGSLNRGQAQTYGTSGSPVTLQHPSIQDQTYLDERISIPKGGGPGFSFRKLWAFTGPGFLMSIAYLDPGNVESDLQCGAVAGFKLLWVLLWATVLGLLCQRLAIRLGVVTGKDLGEICYLYYPKVPRVLLWLMIEIAIIGSDMQEVIGTAIAFSLLSAGRIPLWGGVLITIVDTLFFLFLDKYGLRKLEAFFGLLITIMALTFGYEYVMVRPRQVEVLKGIFLPYCPGCGREELLQAVGIVGAIIMPHNIFLHSSLVKTRDIDRSKKEAVQEANMYFLTESCLALSISFLINLFVMAVFGEAFYHQRNEDVHNKCINSSISRYAGIFPTNNETVSVDIYQGGVVLGCYFGAVALYIWAIGILAAGQSSTMTGTYAGQFVMEGFL…
XP_009273270.2	MSGSGPAMASLEPGLTGSLNQGQAQTYSTGGSPMPPQRPGTRNQTYLDELISIPKGGGPGFSFRKLWAFTGPGFLMSIAYLDPGNVESDLQCGAVAGFKLLWVLLWATVLGLLCQRLAIRLGVVTGKDLGEICYLYYPKVPRVLLWLMIEIAIIGSDMQEVIGTAIAFNLLSAGRIPLWGGVLITIVDTLFFLFLDKYGLRKLEAFFGLLITIMALTFGYEYVMVRPRQAEVLKGIFLPYCPGCGREELLQAVGIVGAIIMPHNIFLHSSLVKTREIDRSKKEAVQEANMYFVTESCLALFVSFLINLFVMAVFGEAFYRQRNEDVHNKCVNSSVSRYAGIFPTNNETVSVDIYQGGVILGCYFGAVALYIWAIGILAAGQSSTMTGTYAGQFVMEGFL…
KFM04641.1	PMPPQRPGTRNQTYLDELISIPKGGGPGFSFRKLWAFTGPGFLMSIAYLDPGNVESDLQCGAVAGFKLLWVLLWATVLGLLCQRLAIRLGVVTGKDLGEICYLYYPKVPRVLLWLMIEIAIIGSDMQEVIGTAIAFNLLSAGRIPLWGGVLITIVDTLFFLFLDKYGLRKLEAFFGLLITIMALTFGYEYVMVRPRQAEVLKGIFLPYCPGCGREELLQAVGIVGAIIMPHNIFLHSSLVKTREIDRSKKEAVQEANMYFVTESCLALFVSFLINLFVMAVFGEAFYRQRNEDVHNKCVNSSVSRYAGIFPTNNETVSVDIYQGGVILGCYFGAVALYIWAIGILAAGQSSTMTGTYAGQFVMEGFLQLRWSRFSRVLFTRSFAILPTVFVAAFKDVSH…
OPJ79899.1	MASLEPGLSGSLNRGQAQDYGTSGSPVSPQHPGTQDQTYLDELISIPKGSGPGFSFRKLWAFTGPGFLMSIAYLDPGNVESDLQCGAVAGFKLLWVLLWATVLGLLCQRLAIRLGVVTGKDLGEICYLYYPKVPRVLLWLMIEIAIIGSDMQEVIGTAIAFSLLSAGRIPLWGGVLITIVDTLFFLFLDKYGLRKLEAFFGILITIMALTFGYEYVVVSPGQVEVLKGIFLPYCPGCGREELLQAVGIVGAIIMPHNIFLHSSLVKTRAIDRSKKEAVREANMYFLTESCLALFVSFLINLFVMAVFGEAFYRQRNEDMHNKCINSSVSHYASIFPANNETVSVDIYQGGVILGCYFGAVALYIWAIGILAAGQSSTMTGTYAGQFVMEGFLQLRWSRF…
XP_013222907.1	MASLEPGLSGSLNRGQAQDYGTSGSPVSPQHPGIRDQTYLDELISIPKGSGPGFSFRKLWAFTGPGFLMSIAYLDPGNVESDLQCGAVAGFKLLWVLLWATVLGLLCQRLAIRLGVVTGKDLGEICYLYYPKVPRVLLWLMIEIAIIGSDMQEVIGTAIAFSLLSAGRIPLWGGVLITIVDTLFFLFLDKYGLRKLEAFFGILITIMALTFGYEYVLVRPGQVEVLKGIFLPYCPGCGREELLQAVGIVGAIIMPHNIFLHSSLVKTRAIDRSKKEAVQEANMYFLTESCLALFVSFLINLFVMAVFGEAFYRQRNEDMHNKCINSSVSHYASIFPANNETVSVDIYQGGVILGCYFGVVALYIWAIGILAAGQSSTMTGTYAGQFVMEGFLQLRWSRF…
XP_005235085.1	MSRSDPATASLEAGLTGSLNRDKAQIYSTGRSPMPPQRPGTRDQTYLDELISIPKGGGPGFSFRKLWAFTGPGFLMSIAYLDPGNVESDLQCGAVAGFKLLWVLLWATILGLLCQRLAIRLGVVTGKDLGEICYLYYPKVPRVLLWLMIEIAIIGSDMQEVIGTAIAFSLLSAGRIPLWGGVLITIVDTLFFLFLDKYGLRKLEAFFGLLITIMALTFGYEYVVVRPGQVEVLKGIFLPYCLGCGREELLQAVGIIGAIIMPHNIFLHSSLVKTRAIDRSKKEAVQEANTYFLIESCLALFVSFLINLFVMAVFGEAFYHQRNEDVHNKCINSSVRQYASIFPTNNETVSVDIYQGGVILGCYFGTAALYIWAIGILAAGQSSTMTGTYAGQFVMEGFL…
XP_005443011.1	MSRSDPATASLEAGLTGSLNRDKAQIYSTGRSPMPPQHPGTRDQTYLDELISIPKGGGPGFSFRKLWAFTGPGFLMSIAYLDPGNVESDLQCGAVAGFKLLWVLLWATILGLLCQRLAIRLGVVTGKDLGEICYLYYPKVPRVLLWLMIEIAIIGSDMQEVIGTAIAFSLLSAGRIPLWGGVLITIVDTLFFLFLDKYGLRKLEAFFGLLITIMALTFGYEYVVVRPGQVEVLKGIFLPYCLGCGREELLQAVGIIGAIIMPHNIFLHSSLVKTRAIDRSKKEAVQEANTYFLIESCLALFVSFLINLFVMAVFGEAFYHQRNEDVHNKCINSSVRQYASIFPTNNETVSVDIYQGGVILGCYFGTAALYIWAIGILAAGQSSTMTGTYAGQFVMEGFL…
KFU88471.1	PMPRQRPDTRDQTHLDKLISIPKDGGPGFSFRKLWAFTGPGFLMSIAYLDPGNVESDLQCGAVAGFKLLWVLLCATILGLLCQRLAIRLGVVTGKDLAEICYLYYPKVPRVLLWLTIELAIIGSDMQEVIGTAIAFSLLSAGRIPLWGGVLITIVDTLFFLFLDKYGLRKLEAFFGFLITIMALTFGYEYVVARPNQVEVLKGIFLPYCPGCGREELLQAVGIVGAIIMPHNIFLHSSLVKTRAIDRSKKEAVQEANMYFLTESCLALFVSFLINLFVMAVFGEAFYHQQNKDVHNKCINSSISSYASIFPDNNETVSVDIYQGGVILGCYFGAVALYIWAIGILAAGQSSTMTGTYAGQFVMEGFLQLRWSRFARVLFTRSFAILPTVFVAAFKDVSH…
XP_009994550.1	MSGSGPAMASLEPGLTGSLNQGQAQTYGTGGSPMPRQRPDTRDQTHLDKLISIPKDGGPGFSFRKLWAFTGPGFLMSIAYLDPGNVESDLQCGAVAGFKLLWVLLCATILGLLCQRLAIRLGVVTGKDLAEICYLYYPKVPRVLLWLTIELAIIGSDMQEVIGTAIAFSLLSAGRIPLWGGVLITIVDTLFFLFLDKYGLRKLEAFFGFLITIMALTFGYEYVVARPNQVEVLKGIFLPYCPGCGREELLQAVGIVGAIIMPHNIFLHSSLVKTRAIDRSKKEAVQEANMYFLTESCLALFVSFLINLFVMAVFGEAFYHQQNKDVHNKCINSSISSYASIFPDNNETVSVDIYQGGVILGCYFGAVALYIWAIGILAAGQSSTMTGTYAGQFVMEGFL…
XP_025933753.1	MRHHPRSSLGQGRGVQADRGSALPAXVSMQLETLEQELHERMELRAHPTERRIHMVRHGEELVVSKTVREGQTEMVSERFCHSLATLQGLLAEGASLLLLRVLARRRAVPPHLTFPTFDAEGHLCTSSYRALGVQQQPVGSEVAEVFVMERAVHPGVGIPVAWHVSFLRDGHLAQRVQVGCPVVVLLQRMPVLIETDEVEPQPLFPKQPLAWEEDAQLYSCFLDRKGTGDLHATVVGCPTSVGAACSGATLSTPPWGSGSTRPRGSRPSTQDQTYLNELISIPKGSRPGFSFRKLWAFTGPGFLMSIAYLDPGNVESDLQCGAVAGFKLLWVLLWATVLGLLCQRLAIRLGVVTGKDLGEICYIYYPKVPRVLLWLMIEIAIIGSDMQEVIGTAIAFSL…
XP_025933752.1	MRHHPRSSLGQGRGVQADRGSALPAXVSMQLETLEQELHERMELRAHPTERRIHMVRHGEELVVSKTVREGQTEMVSERFCHSLATLQGLLAEGASLLLLRVLARRRAVPPHLTFPTFDAEGHLCTSSYRALGVQQQPVGSEVAEVFVMERAVHPGVGIPVAWHVSFLRDGHLAQRVQVGCPVVVLLQRMPVLIETDEVEPQPLFPKQPLAWEEDAQLYSCFLDRKGTGDLHATVVGCPTSVGAACSGATLSTPPWGSGSTRPRGSCWGAPATHLDQAQPWHRWSQRPSTQDQTYLNELISIPKGSRPGFSFRKLWAFTGPGFLMSIAYLDPGNVESDLQCGAVAGFKLLWVLLWATVLGLLCQRLAIRLGVVTGKDLGEICYIYYPKVPRVLLWLMIE…
XP_025933754.1	MRHHPRSSLGQGRGVQADRGSALPAXVSMQLETLEQELHERMELRAHPTERRIHMVRHGEELVVSKTVREGQTEMVSERFCHSLATLQGLLAEGASLLLLRVLARRRAVPPHLTFPTFDAEGHLCTSSYRALGVQQQPVGSEVAEVFVMERAVHPGVGIPVAWHVSFLRDGHLAQRVQVGCPVVVLLQRMPVLIETDEVEPQPLFPKQPLAWEEDAQLYSCFLDRKCWGAPATHLDQAQPWHRWSQRPSTQDQTYLNELISIPKGSRPGFSFRKLWAFTGPGFLMSIAYLDPGNVESDLQCGAVAGFKLLWVLLWATVLGLLCQRLAIRLGVVTGKDLGEICYIYYPKVPRVLLWLMIEIAIIGSDMQEVIGTAIAFSLLSAGRIPLWGGVLITIVDTL…
XP_025933756.1	MRHHPRSSLGQGRGVQADRGSALPAXVSMQLETLEQELHERMELRAHPTERRIHMVRHGEELVVSKTVREGQRALGVQQQPVGSEVAEVFVMERAVHPGVGIPVAWHVSFLRDGHLAQRVQVGCPVVVLLQRMPVLIETDEVEPQPLFPKQPLAWEEDAQLYSCFLDRKGTGDLHATVVGCPTSVGAACSGATLSTPPWGSGSTRPRGSCWGAPATHLDQAQPWHRWSQRPSTQDQTYLNELISIPKGSRPGFSFRKLWAFTGPGFLMSIAYLDPGNVESDLQCGAVAGFKLLWVLLWATVLGLLCQRLAIRLGVVTGKDLGEICYIYYPKVPRVLLWLMIEIAIIGSDMQEVIGTAIAFSLLSAGRIPLWGGVLITIVDTLFFLFLDKYGLRKLEAFF…
XP_025933757.1	MRHHPRSSLGQGRGVQADRGSALPAXVSMQLETLEQELHERMELRAHPTERRIHMVRHGEELVVSKTVREGQTEMVSERFCHSLATLQGLLAEGASLLLLRVLARRRAVPPHLTFPTFDAEGHLCTSSYRALGVQQQPVGSEVAEVFVMERAVHPGVGIPVAWHVSFLRDGHLAQRVQVGCPVVVLLQRMPVLIETDEVEPQPLFPKQPLAWEEDAQLYSCFLDRKRPSTQDQTYLNELISIPKGSRPGFSFRKLWAFTGPGFLMSIAYLDPGNVESDLQCGAVAGFKLLWVLLWATVLGLLCQRLAIRLGVVTGKDLGEICYIYYPKVPRVLLWLMIEIAIIGSDMQEVIGTAIAFSLLSAGRIPLWGGVLITIVDTLFFLFLDKYGLRKLEAFFGLL…
XP_025933758.1	MGVPGCYPPLPPQGHRRPTCNCGGVPHFCGCSLLRSNTEHPSLGVRVHPATGLVLGSPGNTSGSGPAMASLEPGLTGSLNNSQNQPYGTNGCPISPQRPSTQDQTYLNELISIPKGSRPGFSFRKLWAFTGPGFLMSIAYLDPGNVESDLQCGAVAGFKLLWVLLWATVLGLLCQRLAIRLGVVTGKDLGEICYIYYPKVPRVLLWLMIEIAIIGSDMQEVIGTAIAFSLLSAGRIPLWGGVLITIVDTLFFLFLDKYGLRKLEAFFGLLITIMALTFGYEYVVVKPAQVEVLKGIFLPYCPGCGREELLQAVGIVGAIIMPHNIFLHSSLVKTRAIDRSKKEEVQEANMYFLTESCLALFISFLINLFVMAVFGEAFYHQRNEDVHNKCVNSSVSQYA…
XP_013815886.1	MRGARWCPHPPEGCHVLPPLPHLPGLTGSLNNSQNQPYGTNGCPISPQRPSTQDQTYLNELISIPKGSRPGFSFRKLWAFTGPGFLMSIAYLDPGNVESDLQCGAVAGFKLLWVLLWATVLGLLCQRLAIRLGVVTGKDLGEICYIYYPKVPRVLLWLMIEIAIIGSDMQEGIGTAIAFSLLSAGRIPLWGGVLITIVDTLFFLFLDKYGLRKLEAFFGLLITIMALTFGYEYVVVKPAQVEVLKGIFLPYCPGCGREELLQAVGIIGAIIMPHNIFLHSSLVKTRAIDRSKKEEVQEANMYFLTESCLALFISFLINLFVMAVFGEAFYHQRNEDVHNKCVNSSVSQYAGIFPPNNKTVSVDIYQGGVILGCYFGAVALYIWAVGILAAGQSSTMTGT…
XP_025979063.1	MASLEPGLAGSLNHGQTQPYGTNGCPVPLQRPSARDQTYLNELVSIPKGGGPGFSFRKLWAFTGPGFLMSIAYLDPGNVESDLQCGAVAGFKLLWVLLWATVLGLLCQRLAIRLGVVTGKDLGEICYLHWPHVLQVPRVLLWLMIEIAIIGSDMQEVIGTAIAFSLLSAGRIPLWGGVLITIVDTLFFLFLDKYGLRKLEAFFGLLITIMALTFGYEYVMVKPAQSEVLKGIFLPYCPGCGREELLQAVGIVGAIIMPHNIFLHSSLVKTRAIDRSKKEEVQEANMYFLTESCLALFVSFLINLFVMAVFGEAFYHQRNEDVHDKCVNSSVSQYASIFPPNNQTVSVDIYQGGVILGCYFGAVALYIWAVGILAAGQSSTMTGTYAGQFVMEGFLQLRW…
KGL77758.1	PMASQRPSTQDQPYLNELISIPKGSRPGFSFRKLWAFTGPGFLMSIAYLDPGNVESDLQCGAVAGFKLLWVLLWATVLGLLCQRLAIRLGVVTGRDLGEICYLYYPKVPRVLLWLMIEIAIIGSDMQEVIGTAIAFSLLSAGRIPLWGGVLITIVDTLFFLFLDKYGLRKLEAFFGLLITIMALTFGYEYVVVKPAQAEVLKGIFLPYCPGCGREELLQAVGIVGAIIMPHNIFLHSSLVKTRAIDRSKKEEVREANMYFLIESCVALFVSFLINLFVMAVFGEAFYHQRNEDVHDKCVNSSVSQYAGIFPANNKTVSVDIYQGGVILGCYFGAVALYIWAVGILAAGQSSTMTGTYAGQFVMEGFLQLRWSRFARVLFTRSFAILPTVFIAAFKDVSH…
XP_010213645.1	MASQRPSTQDQPYLNELISIPKGSRPGFSFRKLWAFTGPGFLMSIAYLDPGNVESDLQCGAVAGFKLLWVLLWATVLGLLCQRLAIRLGVVTGRDLGEICYLYYPKVPRVLLWLMIEIAIIGSDMQEVIGTAIAFSLLSAGRIPLWGGVLITIVDTLFFLFLDKYGLRKLEAFFGLLITIMALTFGYEYVVVKPAQAEVLKGIFLPYCPGCGREELLQAVGIVGAIIMPHNIFLHSSLVKTRAIDRSKKEEVREANMYFLIESCVALFVSFLINLFVMAVFGEAFYHQRNEDVHDKCVNSSVSQYAGIFPANNKTVSVDIYQGGVILGCYFGAVALYIWAVGILAAGQSSTMTGTYAGQFVMEVFLQLRWSRFARVLFTRSFAILPTVFIAAFKDVSHL…
XP_010142470.1	MSGSSPAMAPLEPGLTGSLNREQAQTYGTSGNPVSPQHPGTRDQTYLDELISIPKDGGPGFSFRKLWAFTGPGFLMSIAYLDPGNVESDLQCGAVAGFKVRLGPPWXXXLGLLCQRLAIRLGVVTGKDLGEICYLYYPKVPRVLLWLMIEIAIIGSDMQEVIGTAIAFSLLSAGRIPLWGGVLITIVDTLFFLFLDKYGLRKLEAFFGLLITIMALTFGYEYVVVRPRQAEVLKGIFLPYCSGCGREELLQAVGIVGAIIMPHNIFLHSSLVKTRAIDRSRKEAVREANMYFLIESCLALFISFLINLFVMAVFGEAFYHQRNEDVVSVTSPLISRYAGIFPANNETVSVDIYQGGVILGCYFGAAALYIWAIGILAAGQSSTMTGTYAGQFVMEGFLQ…
XP_021381995.1	MASLEPGLTKSLNGGPMPPQRPGTRDQTYLDELISIPKGSGPGFSFRKLWAFTGPGFLMSIAYLDPGNVESDLQSGALAGFKLLWVLLWATVLGLLCQRLAIRLGVVTGKDLGEICYLYYPKVPRVLLWLMIEIAIIGSDMQEVIGTAIAFSLLSAGRIPLWGGVLITIVDTFFFLFLDKYGLRKLEAFFGLLITIMALTFGYEYVVVRPRQVEVLKGIFLPSCPGCGRNELLQAMGIIGAIIMPHNIFLHSSLVKTRLIDRAKKEAVQEANMYFLTESCLALFVSFLINLFVMAVFGQAFYHQRNEDVHNKCINSSISHFAGIFPTNNETVSVDIYQGGVILGCYFGAAALYIWGIGILAAGQSSTMTGTYAGQFVMEGFLQLRWSRFARVLFTRSFA…
XP_030134157.1	MASLEPGLTRSLNGGPMPPQRPGTRDQTYLDELISIPKGSGPGFSFRKLWAFTGPGFLMSIAYLDPGNVESDLQSGALAGFKLLWVLLWATVLGLLCQRLAIRLGVVTGRDLGEICYLYYPKVPRVLLWLMIEIAIIGSDMQEVIGTAIAFSLLSAGRIPLWGGVLITVVDTLFFLFLDKYGLRKLEAFFGLLITIMALTFGYEYVVVRPRQVEVLKGIFLPSCPGCGRNELLQAMGIIGAIIMPHNIFLHSSLVKTRLIDRSKKEAVQEANMYFLTESCLALFVSFLINLFVMAVFGEAFYHQRNEDVHNKCINSSISHYAGIFPTNNETVSVDIYQGGVILGCYFGAAALYIWGIGILAAGQSSTMTGTYAGQFVMEGFLQLRWSRFARVLFTRSFA…
RLW04892.1	MTQLRGGSFKSWAAGAALRAEFRTPQHCGWIGSTHGITGARQGQVGLKEAGLTRSLNGGPMPRQRPGTQDQTYLDELISIPKGSGPGFSFRKLWAFTGPGFLMSIAYLDPGNVESDLQSGALAGFKLLWVLLWATVLGLLCQRLAIRLGVVTGKDLGEICYLYYPKVPRVLLWLMIEIAIIGSDMQEVIGTAIAFSLLSAGRIPLWGGVLITVVDTLFFLFLDKYGLRKLEAFFGLLITIMALTFGYEYVVVRPRQVEVLKGIFLPSCPGCGRKELLQAMGIIGAIIMPHNIFLHSSLVKTRLIDRSKKEAVQEANMYFLIESCLALFVSFLINLFVMAVFGQAFYHQRNVDVHNKCVNSSISHYAGIFPTNNKTVSVDIYQGGVILGCYFGAAALYIW…
XP_030097773.1	MAGSDPPMASLEPGLIRSLNGGPLPPQHPGTQDQTYLDELISIPKGSGPGFSFRKLWAFTGPGFLMSIAYLDPGNVESDLQSGALAGFKLLWVLLWATILGLLCQRLAIRLGVVTGKDLGEICYLYYPKVPRVLLWLMIEMAIIGSDMQEVIGTAIAFSLLSAGRIPLWAGVLITIVDTLFFLFLDKYGLRKLEAFFGLLITIMALTFGYEYVVVRPRQVEVLKGIFLPSCPGCGRKELLQAMGIIGAIIMPHNIFLHSSLVKTRLINRSKKEAVQEANMYFLTESCLALFVSFLINLFVMAVFGEAFYHQRNEDVHNKCINSSISHYAGIFPTNNETVSVDIYQGGVILGCYFGAVALYIWGIGILAAGQSSTMTGTYAGQFVMEGFLQLRWSRFTRV…
XP_030808251.1	MASLEPGLTRSLNRGPVPAERPGTRDQTSLDELISIPKGSGPGFSFRKLWAFTGPGFLMSIAYLDPGNVESDLQGGALAGFKLLWVLLWATVLGLLCQRLAIRLGVVTGKDLGEICYLYYPKVPRVLLWLMIEIAIIGSDMQEVIGTAIAFSLLSAGRIPLWAGVLITIVDTLFFLFLDKYGLRKLEAFFGLLITIMALTFGYEYVVVRPRQEEVLKGIFLPSCPGCGRKELLQAMGIIGAIIMPHNIFLHSSLVKTRVIDRSKKEAVQEANMYFLTESCLALFVSFLINLFVMAVFGEAFYHQRNEDVHNKCINSSISHYAGIFPSNNETVSVDIYQGGVILGCYFGAVALYIWGIGILAAGQSSTMTGTYAGQFVMEGFLQLRWSRFTRVLLTRSFA…
XP_014743602.1	MVSLEPGLTKSLNRGQEQSCSTGRSPMPPHRPGTQNQTYLDELISIPKGSGTGFSFRKLWAFTGPGFLMSIAYLDPGNVESDLQGGALAGFKLLWVLLWATVLGLLCQRLAIRLGVVTGKDLAEICYLYYPKVPRVLLWLMIEIAIIGSDMQEVIGTAIAFSLLSAGRIPLWGGVLITIVDTLFFLFFDKYGLRKLEAFFGLLITIMALTFGYEYVVVRPGQVEVLKGIFLPNCPGCGRKELLQAMGIIGAIIMPHNIFLHSSLVKTREIDRSKKEAVQEANMYFLIESCLALFVSFLINLFVMAVFGEAFYHQRNEDVYNKCINSSISHYASIFPINNKTVSVDIYQGGVILGCYFGAAALYIWGIGILAAGQSSTMTGTYAGQFVMEGFLQLRWSRF…
XP_005049526.1	MASLEPGLTKSLNGGQEQSYSTGRSPMPLQHPGTQDQTYLDELISIPKGTGPGFSFRKLWAFTGPGFLMSIAYLDPGNVESDLQGGALAGFKLLWVLLWATVLGLLCQRLAIRLGVVTGKDLGEICYLYYPKVPRVLLWLMIEIAIIGSDMQEVIGTAIAFSLLSAGRIPLWGGVLITIVDTLFFLFLDKYGLRKLEAFFGLLITIMALTFGYEYVVVRPGQVEVLKGIFLPSCPGCGRKELLQAMGIVGAIIMPHNIFLHSSLVKTRVIDRSKKEAVQEANMYFLIESCLALFVSFLINLFVMAVFGEAFYHQRNEDVHSKCVNSSVSHYASIFPTNNKTVSVDIYQGGVILGCYFGAVALYIWGIGILAAGQSSTMTGTYAGQFVMEGFLQLRWSRF…
TRZ27087.1	MASLEPGLTRSLNRGQEQSYSTGRSPKPPQHPGTQDQTYLDELITIPKGSGPGFSFRKLWAFTGPGFLMSIAYLDPGNVESDLQSGALAGFKLLWVLLWATVLGLLCQRLAIRLGVVTGKDLGEICYLYYPKVPRLLLWLMIEIAIIGSDMQEVIGTAIAFSLLSAGRIPLWGGVLITIVDTLFFLFLDKYGLRKLEAFFGFLIMLMALTFGYEYVVVGPGQVEVLKGIFLPSCPGCGRKELLQAMGIIGAIIMPHNIFLHSSLVKTRVIDRSKKEAVQEANMYFLIESCLALFVSFLINLFVMTVFGEAFYHQRNEDVHNKCINSSISHYANIFPTNNQTVSVDIYQGGVILGCYFGAAALYIWGIGILAAGQSSTMTGTYAGQFVMEGFLQLRWSRF…
KFQ36910.1	PVPLQQHPGSQDQTYLDELISVPKGGGPGFSFRKLWAFTGPGFLMSIAYLDPGNVESDLQCGAVAGFKLLWVLLWATVLGLLCQRLAIRLGVVTGKDLAEVCYLYYPKVPRVLLWLMIEVAIIGSDMQEVIGTAIAFSLLSAGRMPLWGGVLITIVDTFFFLFLDKYGLRKLEAFFGFLITIMALTFGYEYVMVRPKQVEVLKGIFLPYCPGCGREELLQAVGIVGAIIMPHNIFLHSSLVKTRAIDRSKKEAVQEANMYFLTESCLALFISFLINLFVMAVFGEAFYRQRNEDVHNKCVNSSVSCYASIFPSNNETVSVDIYQGGVILGCYFGAAALYIWAIGILAAGQSSTMTGTYAGQFVMEGFLQLRWSRFARVLFTRSFAILPTVFVAAFKDVS…
XP_010183982.1	MLPGREWAGVELRPCPHPPVGCHLPSSCSSIPPGHTGSLNQGQAQTYGTGGSPVPLQQHPGSQDQTYLDELISVPKGGGPGFSFRKLWAFTGPGFLMSIAYLDPGNVESDLQCGAVAGFKLLWVLLWATVLGLLCQRLAIRLGVVTGKDLAEVCYLYYPKVPRVLLWLMIEVAIIGSDMQEVIGTAIAFSLLSAGRMPLWGGVLITIVDTFFFLFLDKYGLRKLEAFFGFLITIMALTFGYEYVMVRPKQVEVLKGIFLPYCPGCGREELLQAVGIVGAIIMPHNIFLHSSLVKTRAIDRSKKEAVQEANMYFLTESCLALFISFLINLFVMAVFGEAFYRQRNEDVHNKCVNSSVSCYASIFPSNNETVSVDIYQGGVILGCYFGAAALYIWAIGILA…
XP_021256178.1	MPTAASVVRVGHLGSTGTEEPIPMETAAKFLNCIGPEELERCLFAETLALVAAGGQLQGHLWVTARHAPYEREGQQVRSCLLLQAGSQGLLDGVPYSCSLTGYVSMQLETLEQEQHERLEFGAHPMERKIHMVQNPHGMTATVTTREGEGVPWGVPTGRAAAPGVLLRLGLAGGAAGGGRQPAAAAGAGVPPHRAPQHHLPGHRQGGPPLHCHLLLPGHAAAAGGLGAGRGVGGGESPARCPGHPDGVALQPPLQRALGSAGAGGVPRGSSAAGCTHTWQDGCGAPAPLPKAAAGLGGGCPAVLLVPGQEGLAGSLNRGQTDPSNIPVPPRHPVPHAQTYLDELISIPKGSAPGFSFRKLWAFTGPGFLMSIAYLDPGNVESDLQCGAVAGFKLLWVLL…
XP_021256179.1	MPTAASVVRVGHLGSTEEPIPMETAAKFLNCIGPEELERCLFAETLALVAAGGQLQGHLWVTARHAPYEREGQQVRSCLLLQAGSQGLLDGVPYSCSLTGYVSMQLETLEQEQHERLEFGAHPMERKIHMVQNPHGMTATVTTREGEGVPWGVPTGRAAAPGVLLRLGLAGGAAGGGRQPAAAAGAGVPPHRAPQHHLPGHRQGGPPLHCHLLLPGHAAAAGGLGAGRGVGGGESPARCPGHPDGVALQPPLQRALGSAGAGGVPRGSSAAGCTHTWQDGCGAPAPLPKAAAGLGGGCPAVLLVPGQEGLAGSLNRGQTDPSNIPVPPRHPVPHAQTYLDELISIPKGSAPGFSFRKLWAFTGPGFLMSIAYLDPGNVESDLQCGAVAGFKLLWVLLWA…
XP_021256180.1	MGRCYANGCKRCKEEPIPMETAAKFLNCIGPEELERCLFAETLALVAAGGQLQGHLWVTARHAPYEREGQQVRSCLLLQAGSQGLLDGVPYSCSLTGYVSMQLETLEQEQHERLEFGAHPMERKIHMVQNPHGMTATVTTREGEGVPWGVPTGRAAAPGVLLRLGLAGGAAGGGRQPAAAAGAGVPPHRAPQHHLPGHRQGGPPLHCHLLLPGHAAAAGGLGAGRGVGGGESPARCPGHPDGVALQPPLQRALGSAGAGGVPRGSSAAGCTHTWQDGCGAPAPLPKAAAGLGGGCPAVLLVPGQEGLAGSLNRGQTDPSNIPVPPRHPVPHAQTYLDELISIPKGSAPGFSFRKLWAFTGPGFLMSIAYLDPGNVESDLQCGAVAGFKLLWVLLWATVL…
[truncated: 1,347 more rows]
