# Supplementary material for: Structural and functional properties of a magnesium transporter of the SLC11/NRAMP family
Source: eLife journal article supplement (doi:10.7554/elife.74589), 2022-01-10
Supplement: supp [file Figure2.xlsx]

## Sheet: Fig2A
EcoDMT
Lipid to protein ration 50
Manganese titration
NORMALIZED DATA																															Condition
		Mn concentration (uM)																													Mean	SEM	N
	Time (min)	0	1	5	10	25	50	200	400	0	1	5	10	25	50	200	400		Time (min)	0	1	5	10	25	50	200	400			Time (min)	0 μM Mn2+			1 μM Mn2+			5 μM Mn2+			10 μM Mn2+			25 μM Mn2+			50 μM Mn2+			200 μM Mn2+
	-7.32188	100.148	105.589	104.93	107.163	108.62	113.034	116.783	127.189	112.812	112.868	113.826	116.699	113.476	115.066	115.087	117.93		-7.94897	100.531	106.291	110.145	112.668	116.184	118.586	122.506	121.744			-7.32188	103.701	4.59176	3	107.097	2.99286	3	108.602	2.68269	3	111.031	2.89593	3	111.477	1.46612	3	114.017	0.587404	3	116.668
	-7.25485	99.6036	102.257	100.631	106.244	107.958	112.185	115.729	124.972	113.361	112.483	113.155	114.879	112.303	113.083	114.336	118.309		-7.88193	99.9272	105.623	109.413	112.61	115.978	118.383	120.916	122.678			-7.25485	103.378	5.04059	3	106.063	3.22839	3	106.712	3.61978	3	109.775	2.61375	3	110.678	1.36842	3	113.144	0.572037	3	115.784
	-7.18837	98.127	102.827	101.838	104.55	106.817	112.373	115.647	123.304	111.77	111.188	112.476	113.947	113.189	113.246	113.324	118.124		-7.81545	99.7526	106.547	109.333	112.087	116.3	118.265	122.783	125.667			-7.18837	102.247	4.77635	3	105.632	2.77784	3	106.663	3.11047	3	108.897	2.73536	3	110.535	1.91512	3	113.035	0.338529	3	115.378
	-7.1218	96.7825	103.267	100.332	104.854	105.014	110.415	114.383	124.346	111.552	111.524	111.579	115.454	113.063	112.827	112.426	118.089		-7.74888	100.88	106.33	108.778	112.324	114.403	117.8	121.659	123.799			-7.1218	101.338	5.11731	3	105.577	2.99761	3	105.554	3.27143	3	109.299	3.17707	3	109.472	2.36363	3	112.001	0.793118	3	114.326
	-7.05492	95.469	101.605	98.1786	102.958	105.718	111.362	113.247	118.897	111.674	111.811	111.897	115.967	111.391	112.75	112.858	117.464		-7.682	99.578	105.475	108.963	111.416	113.068	117.182	122.187	123.327			-7.05492	101.103	5.28922	3	105.538	3.16965	3	104.731	3.97219	3	108.645	3.84358	3	108.984	1.69317	3	112.082	0.401411	3	113.913
	-6.98842	96.3628	101.165	100.858	102.343	104.224	110.084	112.88	118.982	111.552	111.483	110.086	113.503	110.977	112.536	112.262	115.79		-7.6155	99.8618	105.141	107.998	110.803	114.659	116.472	120.251	120.525			-6.98842	101.404	5.07428	3	104.7	3.39235	3	105.127	2.68623	3	107.291	3.28323	3	108.343	2.08601	3	111.689	0.802995	3	113.368
	-6.9216	94.2644	100.326	99.32	103.48	103.632	109.208	112.294	123.569	111.351	111.933	110.589	114.409	111.18	112.083	112.042	116.248		-7.54868	100.204	105.188	109.164	111.22	113.868	117.631	119.395	120.525			-6.9216	100.375	5.49945	3	104.301	3.81716	3	104.662	3.26637	3	107.991	3.29572	3	108.348	2.37387	3	111.043	0.920374	3	113.456
	-6.85502	94.1867	100.383	98.3405	102.208	104.044	109.11	113.54	122.29	111.157	111.524	110.07	113.077	110.935	112.682	111.976	115.253		-7.4821	98.1374	103.837	107.186	109.527	113.406	115.322	119.049	122.117			-6.85502	100.328	5.4305	3	104.357	3.59032	3	103.966	3.39431	3	107.025	3.19778	3	108.28	2.1406	3	110.717	1.04657	3	114.216
	-6.78842	94.7773	100.473	99.3443	102.216	103.984	107.599	111.799	118.215	110.882	110.516	109.986	113.599	111.044	112.006	111.307	115.914		-7.4155	97.7736	103.906	108.071	110.46	112.21	115.61	117.986	120.916			-6.78842	100.119	5.38198	3	103.474	3.53367	3	104.123	3.11938	3	107.224	3.35644	3	108.178	2.14377	3	110.54	1.4708	3	112.519
	-6.72163	95.096	99.7311	97.2557	102.334	105.005	108.868	112.624	118.992	109.906	109.606	111.16	112.641	109.415	111.272	109.936	114.408		-7.34872	97.9191	104.326	106.696	109.683	112.482	114.722	118.254	118.701			-6.72163	99.7415	5.08826	3	103.224	3.19582	3	103.687	4.04737	3	106.622	3.09887	3	107.442	1.29395	3	109.997	0.697621	3	112.296
	-6.65503	92.9432	100.644	97.871	100.817	103.357	107.42	112.202	118.537	109.639	108.975	109.567	112.676	108.866	110.998	110.017	114.214		-7.28212	98.1446	102.835	107.05	109.233	112.334	113.952	118.133	119.093			-6.65503	98.6537	5.49412	3	102.564	3.29003	3	102.844	3.4878	3	105.689	3.58304	3	106.462	1.62866	3	109.305	1.03733	3	111.653
	-6.58822	93.8292	98.949	97.4824	101.045	103.632	108.841	111.25	117.703	109.155	108.565	108.51	110.622	108.95	110.998	109.576	113.545		-7.2153	97.1697	103.448	106.35	108.202	111.773	114.164	117.286	119.021			-6.58822	98.5597	5.30768	3	101.772	3.41255	3	102.022	3.32928	3	105.154	2.84685	3	106.75	1.60254	3	109.857	0.625697	3	111.22
	-6.52168	92.9743	98.3624	96.2924	100.885	102.687	107.938	109.93	117.191	108.356	108.827	108.317	110.926	109.178	109.545	110.197	112.664		-7.14877	96.8423	102.881	105.675	108.194	111.6	113.487	117.165	119.84			-6.52168	98.0034	5.17674	3	102.241	3.31029	3	101.92	3.49259	3	105.191	2.9855	3	106.42	1.93624	3	108.926	0.498928	3	110.544
	-6.45512	94.4043	98.4194	97.6119	99.4523	102.473	106.392	111.295	117.409	107.338	107.016	108.644	110.204	108.047	109.238	108.891	111.801		-7.0822	95.6781	101.942	104.751	107.589	110.339	112.76	116.171	119.902			-6.45512	98.2744	4.54803	3	101.165	2.92749	3	102.142	3.33404	3	104.301	3.14812	3	106.005	1.77324	3	107.978	0.83752	3	110.373
	-6.38827	93.9224	98.4276	96.3653	98.9804	101.94	107.536	109.399	115.912	107.669	107.409	107.018	110.047	106.426	108.554	107.911	111.264		-7.01535	96.1656	103.2	104.116	107.009	109.844	112.134	115.635	116.566			-6.38827	98.2532	4.71307	3	101.073	3.18234	3	101.642	3.07549	3	103.617	3.31811	3	104.85	1.45648	3	108.306	0.392986	3	109.484
	-6.32173	92.1194	97.5477	95.5719	99.7303	101.769	106.159	109.985	114.793	106.822	106.942	106.515	110.239	107.54	106.537	108.94	111.502		-6.94882	96.2966	101.452	104.437	106.027	109.828	112.447	114.961	117.936			-6.32173	97.2241	4.80203	3	100.435	3.26031	3	100.741	3.1733	3	104.173	3.14001	3	105.343	1.80276	3	106.606	0.279337	3	109.872
	-6.2549	92.1582	96.9774	94.8676	99.5955	101.854	105.873	108.831	115.864	106.329	106.016	106.179	109.568	106.468	107.418	107.772	109.432		-6.88198	95.5108	100.645	104.076	106.084	110.232	111.838	116.033	117.135			-6.2549	96.9541	4.68797	3	100.061	2.97827	3	100.435	3.2666	3	103.916	2.95487	3	104.907	1.52632	3	106.998	0.568374	3	108.565
	-6.1883	92.3137	97.7595	95.3129	98.9804	100.695	104.836	108.666	115.514	105.562	105.827	105.643	109.185	105.978	107.084	106.49	110.665		-6.81538	95.6417	101.165	103.489	105.79	109.861	110.359	117.131	116.566			-6.1883	96.8133	4.37508	3	100.29	2.77236	3	99.8389	3.04964	3	103.406	3.02257	3	104.126	1.71726	3	106.403	0.785642	3	108.241
	-6.12175	92.7567	97.8573	94.3334	99.1489	101.047	105.301	107.081	115.58	106.232	106.598	104.293	107.722	104.517	106.572	106.441	108.454		-6.74883	94.6959	99.4331	103.039	105.855	109.506	112.016	114.451	115.854			-6.12175	97.1261	4.55432	3	99.9214	3.41829	3	99.1991	2.8773	3	102.62	2.60581	3	103.515	1.24093	3	106.455	0.635081	3	107.714
	-6.05492	92.166	98.0609	94.1067	99.1152	100.3	105.453	108.281	114.026	105.49	104.254	105.307	107.305	104.847	106.836	106.45	108.014		-6.682	94.2229	100.334	102.645	104.89	107.907	109.851	114.33	115.116			-6.05492	96.364	4.56768	3	99.1769	2.66798	3	98.9526	3.32018	3	102.647	2.43015	3	103.604	1.6684	3	106.461	0.50956	3	108.229
	-5.98837	92.337	97.5069	94.5924	98.3231	99.7424	104.81	107.979	114.32	104.254	104.516	104.804	107.479	104.788	105.486	104.368	107.9		-6.61545	93.3789	98.0739	101.093	103.574	107.165	109.496	112.74	115.107			-5.98837	95.8419	4.22574	3	99.1055	2.77968	3	99.1853	2.9922	3	101.92	2.81904	3	103.181	1.72048	3	105.76	0.642634	3	107.207
	-5.92153	91.6298	97.2462	95.0457	98.3652	100.24	104.962	107.246	114.016	104.957	104.131	102.733	105.894	105.303	105.486	105.576	106.279		-6.54862	92.695	97.8021	100.072	103.795	107.668	109.733	112.835	114.128			-5.92153	95.7044	4.63712	3	98.7918	2.74722	3	98.764	2.22276	3	101.406	2.29067	3	103.101	1.49801	3	105.836	0.630717	3	107.077
	-5.85497	91.9251	96.5211	93.9286	97.7585	99.399	105.31	108.171	112.045	104.198	103.787	103.429	105.589	103.555	105.828	105.38	106.411		-6.48205	92.6804	99.534	101.15	103.762	107.395	109.293	111.504	112.456			-5.85497	95.4578	4.39673	3	98.1144	2.92548	3	98.3717	2.75974	3	101.269	2.29664	3	102.29	1.44925	3	105.92	0.381161	3	107.09
	-5.7884	91.0469	96.3663	93.2648	97.2445	99.3304	104.327	106.861	110.14	103.431	103.213	101.97	104.815	102.525	105.059	105.617	105.416		-6.41548	93.0806	98.0584	100.169	103.247	107.494	108.304	110.933	112.598			-5.7884	95.1519	4.13959	3	98.045	2.63629	3	97.3774	2.52451	3	100.476	2.25421	3	101.888	1.33151	3	104.876	0.279755	3	106.729
	-5.72162	92.1038	96.57	93.2162	96.663	99.5622	104.47	107.182	111.524	103.827	104.409	102.599	105.024	103.209	104.674	104.531	105.945		-6.3487	93.1679	97.3827	101.543	101.824	106.184	108.828	111.141	112.856			-5.72162	95.3281	4.29026	3	98.416	3.06954	3	98.0665	2.71326	3	100.074	2.53303	3	101.885	1.16538	3	104.832	0.266764	3	106.451
	-5.65505	91.4899	96.9122	92.6657	97.7922	99.1758	104.667	106.138	111.704	103.488	102.385	102.54	103.517	101.942	103.341	103.804	104.729		-6.28213	92.7314	96.8158	100.137	102.552	106.719	107.12	110.691	112.456			-5.65505	94.6709	4.46491	3	97.3608	2.78036	3	98.0645	2.88768	3	100.06	1.75635	3	101.499	1.23375	3	104.355	0.519134	3	105.521
	-5.5882	92.0261	95.022	92.2367	97.1096	97.8451	103.361	106.935	109.221	101.768	101.287	101.543	104.223	102.668	104.444	103.282	103.699		-6.21528	92.3749	97.1886	100.257	102.584	106.398	107.703	109.092	111.308			-5.5882	94.1382	3.93954	3	96.7736	2.27533	3	96.9297	2.68671	3	99.9834	2.16383	3	101.141	1.64954	3	103.918	0.312845	3	105.2
	-5.52163	90.9769	96.0811	93.8557	96.8147	99.3046	103.799	106.064	108.216	102.406	101.033	101.878	103.561	101.9	102.606	103.012	103.937		-6.14872	92.564	97.2818	98.5611	102.053	105.705	107.289	109.568	111.201			-5.52163	94.2751	4.08936	3	96.356	2.62439	3	97.1578	2.42199	3	99.4955	2.06685	3	101.058	0.877103	3	103.801	0.690252	3	105.382
	-5.4551	90.8448	95.7471	92.3338	97.0675	98.5491	101.904	105.478	112.964	101.857	101.615	100.453	104.423	101.216	101.846	103.576	103.84		-6.08218	92.3894	95.3091	98.9711	100.99	104.98	107.492	109.62	110.863			-5.4551	93.6237	4.18839	3	96.4438	2.80599	3	95.9557	2.38425	3	100.126	2.21171	3	100.422	0.939961	3	102.462	0.587275	3	104.796
	-5.38823	90.5728	94.6228	91.7834	96.5787	97.7335	103.29	104.773	108.51	101.615	101.5	101.191	102.751	100.667	102.692	103.061	103.558		-6.01532	91.4363	95.2159	97.4437	101.521	105.664	107.095	109.957	110.365			-5.38823	93.5711	4.06493	3	96.1835	2.73269	3	96.0717	2.7472	3	98.5391	2.10775	3	99.9808	1.15167	3	103.262	0.321706	3	104.885
	-5.32172	91.0702	95.3886	91.6538	96.781	98.5148	102.146	105.222	107.42	100.388	100.426	101.015	102.002	100.819	102.196	101.665	102.836		-5.9488	90.9342	95.2936	98.1592	99.9591	105.013	106.985	109.274	110.569			-5.32172	93.1654	3.71561	3	96.0136	2.38777	3	95.6858	2.77888	3	98.9157	1.58067	3	100.204	0.854886	3	102.327	0.156503	3	103.774
	-5.25487	90.3474	95.3397	92.1638	95.1546	97.2699	103.594	105.643	109.155	100.565	99.3197	98.5579	100.766	99.9493	101.025	100.767	102.677		-5.88195	90.5268	94.9984	98.5129	99.9591	103.76	107.061	108.41	108.879			-5.25487	93.0588	3.80102	3	95.5689	2.10252	3	94.9217	1.89732	3	97.3918	1.71683	3	99.4029	1.10794	3	102.614	0.801316	3	104.159
	-5.18833	91.4277	94.2317	91.9696	95.3822	98.1027	102.485	103.866	109.818	101.049	98.9017	98.9352	101.428	99.1218	100.752	100.351	102.061		-5.81542	90.2503	94.0354	97.7572	100.458	103.916	106.621	107.718	108.861			-5.18833	93.6386	3.8046	3	94.9437	2.10987	3	95.1194	2.03819	3	97.7536	1.86283	3	99.2287	0.683085	3	101.753	0.518	3	103.146
	-5.12177	90.8215	94.2317	90.65	95.6518	97.9911	101.35	103.124	111.088	100.194	99.2542	98.9687	101.645	98.6405	99.6411	101.339	100.96		-5.74885	90.9779	94.5558	96.8971	99.3703	103.809	105.243	107.71	108.852			-5.12177	92.625	3.95343	3	94.8722	2.36678	3	94.5648	2.41382	3	97.8779	1.89415	3	98.7563	0.478716	3	101.049	0.741492	3	103.035
	-5.05492	89.5624	94.0932	91.2653	95.9467	96.978	101.994	103.848	110.567	99.6206	98.8689	98.3315	100.07	98.2099	100.291	100.384	101.171		-5.682	90.0538	94.2684	98.3842	98.5361	102.886	105.353	107.64	107.731			-5.05492	91.8639	3.98378	3	94.6252	2.31194	3	94.2841	2.10367	3	97.181	1.44942	3	98.6268	1.09238	3	101.61	0.67858	3	102.574
	-4.9883	89.679	93.9791	91.4596	94.2951	95.6216	101.672	103.655	109.031	98.5146	98.6477	97.7949	100.81	98.5223	100.684	99.453	100.044		-5.61538	89.0352	92.785	98.9871	98.8714	103.38	105.057	106.621	107.544			-4.9883	91.7499	3.46604	3	94.5315	2.23415	3	94.4032	1.84254	3	97.2261	1.9087	3	98.0645	1.29857	3	101.242	0.29235	3	102.312
	-4.92152	89.5858	93.9547	91.5729	94.4973	97.8022	101.243	103.444	109.05	99.2331	98.3034	98.0045	100.235	98.1255	99.6582	98.4897	100.599		-5.5486	88.6205	94.0121	97.0096	98.6179	102.91	103.949	105.385	107.9			-4.92152	91.8589	3.77638	3	94.5588	2.01043	3	94.6073	1.8655	3	97.1783	1.66697	3	98.6865	0.728689	3	100.839	0.599939	3	102.149
	-4.85495	88.4977	93.417	90.2453	95.0198	96.068	101.94	102.84	108.141	97.344	97.5658	97.9123	99.2948	98.345	98.3507	99.2244	99.4276		-5.48203	89.4427	91.954	95.7395	98.1109	101.97	104.997	107.07	107.562			-4.85495	90.6507	3.41689	3	93.8903	1.99947	3	93.657	2.25311	3	96.6383	1.33878	3	97.9096	0.962479	3	100.562	1.11674	3	101.921
	-4.78838	88.7619	93.197	91.2572	94.885	96.2912	101.189	102.831	110.529	97.5539	97.0494	97.4595	99.4341	97.6948	98.5985	99.8775	100.123		-5.41547	88.1694	91.9696	95.0804	98.8878	101.501	103.636	105.333	107.527			-4.78838	90.8548	3.42723	3	93.6759	1.82523	3	93.9774	1.83055	3	96.9206	1.33478	3	97.5089	0.655989	3	100.031	0.760228	3	101.784
	-4.72158	89.679	93.2377	90.5934	93.4356	96.9609	100.51	102.134	109.799	98.1755	96.8937	97.971	98.1282	97.7877	97.6756	97.5508	98.9168		-5.34867	88.5259	92.4278	95.2412	96.2872	101.542	103.805	106.819	106.077			-4.72158	91.1276	3.7221	3	93.4227	1.95277	3	94.1168	2.13614	3	95.4978	1.3841	3	97.8895	0.567826	3	99.6065	0.9661	3	101.171
	-4.65505	88.6687	92.7	89.4601	93.5873	95.5872	101.529	102.189	106.274	96.6013	96.7052	96.0845	98.3632	96.8673	97.1116	98.2856	98.6614		-5.28213	88.0384	92.2258	94.3891	97.9637	101.278	102.638	104.434	105.979			-4.65505	90.283	3.2826	3	93.0408	2.02442	3	92.7967	1.91247	3	95.684	1.40913	3	97.254	1.09119	3	99.8765	1.39121	3	101.654
	-4.58817	87.7905	91.7712	89.6543	93.2249	95.9478	100.313	102.831	106.16	97.3278	95.5086	96.2019	99.0771	97.4922	97.3423	96.661	99.7358		-5.21525	88.264	92.0472	94.0434	96.2545	100.989	103.222	106.067	107.153			-4.58817	90.3707	3.517	3	92.7414	1.40402	3	93.1739	1.90604	3	95.8175	1.722	3	96.9284	0.492132	3	99.6102	1.16095	3	100.525
	-4.52165	89.7801	92.8222	90.3505	92.6182	94.0333	98.4892	101.521	109.325	97.4732	96.0249	96.8559	97.806	95.7612	97.3252	97.0447	97.4108		-5.14873	88.4386	91.6977	94.4534	96.4508	100.462	102.021	105.22	106.005			-4.52165	90.9514	3.47688	3	93.3778	1.39589	3	93.1015	1.9438	3	94.9571	1.51915	3	95.738	0.977552	3	98.1707	0.427014	3	100.81
	-4.45508	88.4355	92.1053	89.0148	92.121	95.158	100.232	102.217	107.098	96.3995	95.5086	94.7933	97.9453	95.9385	96.7698	97.0447	98.6438		-5.08217	86.8597	91.1308	94.0756	96.3363	99.6372	102.156	104.641	105.098			-4.45508	90.2811	3.13836	3	92.4722	1.65732	3	92.0277	1.67269	3	94.767	1.70228	3	96.0593	0.558514	3	98.8344	1.05369	3	100.529
	-4.38823	90.0054	92.0482	88.521	93.0058	94.909	98.7216	101.722	107.051	97.2633	94.8037	96.5037	97.0921	96.5043	96.4194	96.2528	97.2259		-5.01532	86.4086	90.9133	93.2556	95.5267	100.693	102.545	103.492	103.843			-4.38823	91.0123	3.35627	3	92.0474	1.59162	3	92.4922	2.3045	3	94.8974	1.18931	3	96.4974	0.915101	3	98.5044	1.1462	3	99.907
	-4.32167	88.6842	91.5838	89.2172	92.5086	94.5742	99.6335	101.612	106.804	95.4791	95.7954	95.07	96.6307	95.947	96.6416	95.8772	97.7279		-4.94875	87.0562	90.9677	93.955	96.5734	100.049	101.37	103.829	104.466			-4.32167	89.8172	2.99593	3	92.4458	1.73934	3	92.0186	1.69418	3	94.3735	1.206	3	95.8758	0.731772	3	98.4709	0.925765	3	99.6414
	-4.25462	87.3941	93.0992	88.3024	93.5788	93.6985	99.1865	102.226	107.998	97.1099	94.6234	95.3299	96.3434	96.5971	96.6843	95.1751	97.2171		-4.8817	86.7579	91.4181	94.2444	96.8024	100.132	101.615	104.512	105.098			-4.25462	89.6372	3.83448	3	92.2755	1.64575	3	91.6824	2.03307	3	94.798	0.814557	3	95.3856	0.8699	3	98.3897	0.853273	3	99.9779
	-4.1883	87.3552	90.8343	89.8567	92.5761	94.5742	98.373	101.567	107.127	95.0513	96.3364	95.2293	97.2662	95.6092	96.1118	96.0078	98.3708		-4.81538	86.1103	90.6881	92.8135	95.6003	99.3157	101.395	103.699	104.368			-4.1883	88.9381	3.17281	3	91.9983	2.24532	3	92.2152	1.58521	3	94.5642	1.40021	3	95.645	0.628819	3	97.9699	0.977445	3	99.8483
	-4.12175	87.2853	90.0521	88.1243	92.3401	93.3293	98.9272	101.438	108.501	95.6406	95.9675	95.724	96.5349	95.0773	95.7529	96.1793	95.3148		-4.74883	86.2485	90.7813	93.2154	96.4426	98.5407	100.304	102.645	103.817			-4.12175	89.0239	3.43024	3	91.7518	2.12099	3	92.017	2.19579	3	94.1054	1.25564	3	94.9373	0.890712	3	97.9364	1.09331	3	99.8339
	-4.05487	86.8812	90.0684	89.3386	90.7475	92.7799	99.0971	102.364	105.601	96.6578	94.23	95.07	95.8297	96.1581	95.1718	94.9465	95.1563		-4.68195	85.5282	90.1367	93.7862	94.9297	98.9199	100.634	103.829	103.674			-4.05487	91.736	2.82247	3	93.6012	1.88452	3	94.8216	3.09642	3	96.2999	3.34969	3	97.5713	3.25204	3	99.6906	2.79609	3	101.768
	-3.98832	87.8915	90.101	89.2253	92.1294	93.4152	98.5607	100.284	105.705	95.0836	94.525	93.3848	94.6979	95.0857	95.599	94.5465	95.579		-4.6154	85.5792	89.7173	92.8457	95.1014	99.3074	100.989	104.486	103.728			-3.98832	91.3783	2.07904	3	93.6716	1.86456	3	94.123	3.06309	3	95.789	2.48838	3	97.1976	2.98631	3	99.8543	2.90322	3	101.152
	-3.92153	87.5495	92.2193	89.3143	91.0424	93.3551	98.0511	99.0198	105.686	95.5518	94.6398	94.0555	95.9342	95.2884	95.2059	96.4895	96.0018		-4.54862	85.9939	90.9444	93.6656	95.1505	97.3452	101.175	102.083	104.048			-3.92153	91.4058	2.31458	3	94.2632	1.08772	3	94.6388	3.25556	3	96.1714	3.032	3	97.4319	3.1599	3	99.4576	2.9459	3	101.638
	-3.85492	86.5936	91.2091	87.9705	91.548	93.5697	98.2567	99.1297	108.254	95.1239	93.9513	93.4267	95.2377	93.5912	95.035	94.9547	94.1259		-4.482	85.601	91.2861	92.0981	94.4472	97.4194	98.6978	103.863	102.909			-3.85492	90.7821	2.46368	3	93.4898	1.20586	3	93.4936	3.20824	3	95.538	2.39502	3	96.5475	2.9671	3	99.0464	2.5744	3	100.52
	-3.78837	86.8501	90.6469	88.1567	90.9497	93.5354	98.2925	99.8717	107.629	95.0028	94.4349	93.0662	94.9591	93.4054	93.531	95.5507	95.262		-4.41545	86.0084	89.8027	92.2749	94.2345	97.0814	99.5011	102.325	102.393			-3.78837	91.0891	2.35911	3	93.1789	1.26599	3	93.1595	2.91568	3	95.5183	2.81304	3	96.771	3.30079	3	98.9121	3.30024	3	100.595
	-3.72158	88.521	90.7284	88.1486	90.402	93.8874	98.4355	99.2396	105.724	95.0028	93.8612	93.7034	94.7153	93.2534	94.4112	95.4282	94.4342		-4.34867	85.7683	89.2902	92.4518	94.5944	98.079	100.372	101.746	102.171			-3.72158	91.2241	1.9469	3	93.1882	1.27127	3	93.6238	3.13834	3	95.0854	2.81693	3	96.5271	2.96233	3	98.8248	2.66765	3	100.579
	-3.655	87.1143	90.4106	88.1082	91.0087	92.2991	97.1214	98.9373	106.463	93.1299	93.5087	93.259	94.9068	93.1267	93.2832	93.7791	94.3813		-4.28208	85.2881	89.9581	91.7685	93.981	97.1061	99.1375	101.435	102.233			-3.655	90.1479	1.73674	3	93.1098	1.45694	3	93.3014	3.01062	3	95.496	2.77651	3	96.0819	3.37739	3	98.3067	3.2962	3	100.073
	-3.58815	86.6946	89.5715	86.7967	91.2446	92.3935	97.5505	99.6244	104.502	94.5588	93.8038	94.7095	94.5673	93.2281	93.6421	94.522	93.5271		-4.21523	84.4077	89.1038	91.4148	94.4717	95.8612	99.2982	102.532	102.02			-3.58815	90.2223	2.30592	3	92.5039	1.46935	3	93.3183	3.43477	3	95.0199	2.32132	3	96.1581	3.35596	3	98.3918	3.01456	3	100.204
	-3.52165	86.9356	90.321	88.0839	91.548	92.5824	97.622	98.9831	106.994	93.2187	92.3777	93.6111	94.4802	93.5658	94.7445	94.1873	93.0691		-4.14873	84.4077	88.8242	91.5595	93.8502	96.7516	99.425	101.971	102.304			-3.52165	90.0281	1.81445	3	92.4311	1.23397	3	93.1561	2.80634	3	95.1165	2.26638	3	96.0038	2.94345	3	98.38	2.34856	3	100.04
	-3.45507	86.7646	89.0908	87.1043	90.5705	91.4406	97.3985	99.4687	106.217	93.1703	92.3941	92.3283	93.3049	94.0893	93.8985	93.6811	93.7737		-4.08215	84.1458	89.2358	92.2026	93.4413	96.4053	99.129	101.884	101.913			-3.45507	89.8653	1.85198	3	91.9851	1.56636	3	92.343	3.02882	3	94.2326	2.42685	3	95.5147	2.85404	3	98.0404	2.59657	3	99.9926
	-2.34305	97.4198	102.322	100.324	103.295	102.756	113.052	115.857	114.045	101.703	101.147	102.465	104.109	102.035	103.23	102.988	103.531		-2.97013	91.6691	96.5051	100.056	102.323	103.776	104.803	107.995	108.043			-2.34305	96.339	3.45171	3	99.2537	2.50406	3	100.426	1.14898	3	102.198	1.52219	3	102.188	0.293928	3	106.231	3.41886	3	108.35
	-2.28045	96.4561	102.803	99.9919	102.823	102.361	110.844	115.729	117.068	101.671	100.451	102.566	103.526	100.684	101.683	101.143	103.734		-2.90753	91.1598	96.3886	99.7588	100.54	103.092	105.403	108.626	112.349			-2.28045	95.9366	3.47046	3	99.3785	2.34854	3	100.279	1.24553	3	101.934	1.25729	3	101.449	0.489616	3	105.489	2.75544	3	107.966
	-2.21772	96.4172	101.173	100.113	104.213	103.494	112.659	115.244	114.917	102.575	101.303	102.197	102.499	100.701	103.042	102.743	102.774		-2.8448	91.1161	95.9304	100.547	101.537	103.652	105.116	109.404	112.82			-2.21772	96.2445	3.70596	3	99.122	2.11649	3	100.237	1.09766	3	102.371	1.10248	3	102.019	0.810155	3	106.417	3.12408	3	108.442
	-2.15507	95.7721	100.399	98.7452	104.02	104.164	111.345	114.025	114.064	101.179	99.8525	102.23	102.098	100.439	101.649	102.008	102.607		-2.78215	90.6286	95.3091	99.0836	99.8283	102.482	103.847	107.476	110.667			-2.15507	95.4257	3.42589	3	98.2899	1.84275	3	99.8187	1.20816	3	101.554	1.60382	3	101.999	1.11702	3	105.777	2.88981	3	107.782
	-2.09245	94.754	101.369	98.7695	101.803	101.442	110.37	114.602	115.637	101.348	100.598	101.601	103.221	101.402	100.949	100.416	103.144		-2.71953	91.4144	94.4548	98.2556	100.646	103.372	104.913	106.361	110.89			-2.09245	95.1913	3.4354	3	98.8176	2.17726	3	99.5368	1.04356	3	101.511	1.08146	3	101.811	0.38911	3	104.497	2.9576	3	107.395
	-2.02975	95.1348	101.084	98.1543	101.626	102.344	110.54	113.714	112.737	101.736	100.484	101.836	103.779	100.92	102.367	101.331	103.593		-2.65683	90.1484	94.9751	99.0193	100.139	102.44	103.628	107.07	110.587			-2.02975	95.2946	3.67348	3	98.617	2.17347	3	99.4958	1.17439	3	101.297	1.53634	3	101.613	0.411345	3	105.306	2.62368	3	107.446
	-1.96705	94.0934	99.5519	97.9195	101.129	101.502	109.369	112.23	112.983	100.904	100.508	101.576	101.75	99.924	101.248	100.629	102.624		-2.59413	90.1994	95.4101	98.537	100.572	102.82	104.515	107.502	110.178			-1.96705	94.7916	3.34583	3	97.9205	2.12752	3	99.0978	1.23977	3	100.676	0.784124	3	100.954	0.515202	3	104.587	2.45275	3	106.718
	-1.90443	94.1478	99.78	96.8591	100.809	100.859	107.518	112.743	111.135	101.631	100.197	100.377	102.238	100.101	101.051	99.8041	102.501		-2.53152	89.4136	94.1364	98.4486	99.2476	102.853	103.983	106.465	109.493			-1.90443	94.8943	3.69272	3	97.9782	2.0138	3	97.9507	1.21533	3	100.307	1.2845	3	100.988	0.552909	3	104.198	1.86893	3	106.222
	-1.84175	94.1945	100.432	98.0733	100.961	100.567	107.402	111.314	111.097	100.21	100.508	100.922	101.637	98.6828	100.461	101.02	101.647		-2.46883	89.9302	94.5946	97.7733	99.3212	101.863	102.774	106.949	110.454			-1.84175	94.9576	2.83785	3	98.3355	2.13462	3	98.8372	1.05487	3	100.531	0.79261	3	100.25	0.828673	3	103.777	2.00956	3	106.373
	-1.77887	94.6918	99.2912	97.7738	101.315	102.241	108.555	112.385	111.372	99.7417	100.557	101.031	101.889	99.6622	100.718	100.408	101.708		-2.40595	89.6609	94.4703	97.5965	98.8224	101.014	102.824	106.828	109.057			-1.77887	94.4775	3.10304	3	98.2409	1.72258	3	98.4308	1.35228	3	100.749	0.868908	3	101.242	0.798908	3	104.202	2.30393	3	106.25
	-1.71617	94.3343	99.0142	98.1381	100.413	101.374	107.769	112.999	110.747	101.13	101.082	100.511	102.69	99.6791	101.367	100.147	101.083		-2.34325	89.8938	94.2917	98.4887	99.1904	101.773	102.41	106.206	109.084			-1.71617	94.8139	3.51651	3	98.0516	2.08376	3	98.2235	1.297	3	100.279	1.43209	3	101.263	0.884506	3	104.339	1.86202	3	106.67
	-1.65347	94.4354	99.7148	98.1624	101.213	99.4505	108.797	111.277	114.936	101.372	101.09	101.157	101.524	100.236	100.94	100.441	101.629		-2.28055	89.6828	94.882	98.2797	99.4521	101.303	103.94	107.027	108.425			-1.65347	94.9574	3.56261	3	97.6614	2.76967	3	98.4307	1.50259	3	100.403	0.970069	3	100.327	0.534203	3	104.071	2.40397	3	105.954
	-1.59062	94.2255	100.081	97.5552	100.126	100.635	108.77	111.149	113.391	100.573	99.9262	100.419	101.088	99.4427	100.043	100.449	100.951		-2.2177	89.741	94.8897	98.4003	100.401	101.863	103.551	107.338	108.639			-1.59062	94.4852	3.4424	3	98.0196	1.98481	3	98.2878	1.08289	3	99.3718	1.26641	3	100.543	0.610083	3	103.817	2.58734	3	105.433
	-1.52788	93.4794	99.0223	96.8995	100.489	99.4334	107.447	112.092	111.202	101.066	99.0083	98.9687	101.106	99.1641	100.735	99.7877	100.766		-2.15497	89.3263	94.6179	98.4807	98.5443	101.393	104.338	107.312	108.319			-1.52788	94.3376	3.66193	3	97.1301	1.88519	3	97.3339	0.846802	3	99.9236	0.891609	3	99.9007	0.607026	3	103.686	1.97949	3	106.066
	-1.46512	93.8836	99.4134	97.2962	100.666	99.7768	108.537	112.505	110.15	101.09	100.992	100.83	101.959	100.912	101.624	100.686	100.907		-2.0922	89.4718	94.4859	98.2395	99.5093	102.589	102.173	107.165	107.918			-1.46512	94.3009	3.80487	3	97.8025	2.44288	3	97.9874	1.48249	3	100.133	1.2366	3	100.422	0.336738	3	103.976	2.28104	3	106.295
	-1.40247	93.7281	98.3542	96.4948	99.2753	100.155	107.429	110.26	113.846	99.887	99.1558	100.075	100.618	99.4765	100.325	99.9837	100.405		-2.02955	89.0134	94.2839	98.4968	98.4871	101.575	103.01	107.295	108.256			-1.40247	94.2313	3.13016	3	97.0239	1.74651	3	97.3107	1.42058	3	99.3375	0.722078	3	100.105	0.349542	3	103.515	2.08253	3	105.209
	-1.33967	93.2074	98.8105	96.2114	99.5618	99.9914	106.535	110.379	110.33	101.461	100.484	99.9665	101.733	100.692	101.683	99.6734	100.819		-1.96675	89.3772	93.7015	97.7974	99.1495	101.435	103.146	107.295	108.372			-1.33967	94.2915	3.86471	3	97.7195	1.98709	3	97.2522	1.36935	3	99.8699	0.998403	3	100.588	0.318586	3	103.464	1.54204	3	105.175
	-1.277	92.8577	98.2728	96.6324	98.2135	99.3819	107.429	110.672	110.633	100.089	99.4673	101.333	101.376	99.544	100.59	100.376	100.934		-1.90408	88.9042	93.9578	96.6158	97.8737	102.003	104.025	106.119	106.868			-1.277	93.407	3.70937	3	96.8495	2.04977	3	97.8401	1.77402	3	99.0343	1.18792	3	99.7244	0.265608	3	103.29	2.10122	3	105.728
	-1.21438	92.881	98.5172	96.1953	98.5169	100.155	108.403	109.115	110.851	99.9758	100.967	100.57	100.932	99.696	101.188	100.343	99.9207		-1.84147	90.4686	94.0665	97.5161	98.9941	101.501	103.467	106.785	108.665			-1.21438	93.5978	3.49386	3	97.6923	2.16838	3	97.6356	1.46733	3	98.8212	1.1408	3	100.112	0.229136	3	103.89	2.27112	3	104.939
	-1.15153	92.3603	97.7839	92.01	99.427	99.3389	106.151	107.961	110.879	99.5883	100.311	99.1783	101.28	99.0205	100.957	101.331	100.414		-1.77862	88.9988	94.8742	96.4871	99.0432	101.822	103.332	105.955	108.852			-1.15153	93.2732	3.41313	3	96.8514	2.3143	3	95.7257	2.07348	3	99.5432	0.970823	3	99.3762	0.216913	3	102.913	1.63033	3	104.711
	0	100	100	100	100	100	100	100	100	100	100	100	100	100	100	100	100		-0.627083	88.977	94.0587	96.0209	97.7347	102.737	103.881	106.863	106.753			0	100	0	3	100	0	3	100	0	3	100	0	3	100	0	3	100	0	3	100
	0.06255	101.174	98.7453	97.7091	98.6096	97.7078	97.1929	98.4885	98.0572	99.5883	100.148	98.9603	99.6866	98.9361	99.8975	99.4367	99.3923		-0.564533	89.0643	92.1792	95.9727	98.4707	101.294	102.478	106.145	108.79			0.06255	100.264	0.472399	3	99.2815	0.437096	3	98.6567	0.483887	3	99.353	0.372357	3	98.4526	0.377885	3	98.3198	0.812606	3	98.1617
	0.125317	99.6891	99.4867	97.1991	98.8877	96.2225	94.9937	94.8516	94.2949	100.194	98.7624	99.5053	99.0771	99.4005	99.53	99.8939	100.009		-0.501767	88.6569	94.0509	96.8891	96.9006	101.55	102.638	104.702	107.429			0.125317	99.3207	0.637634	3	98.9892	0.24907	3	98.4513	0.673097	3	98.4684	0.516937	3	97.7083	0.923186	3	97.0668	1.32394	3	96.5746
	0.1879	100.925	99.1527	95.491	96.2248	96.4715	94.0193	91.7094	90.9875	99.1039	99.3935	98.7507	98.6505	98.6912	99.248	100.914	101.154		-0.439183	88.4677	93.3597	96.1334	98.1763	101.105	102.875	106.318	105.979			0.1879	99.7161	0.604364	3	98.8708	0.408267	3	96.8453	0.980525	3	97.0705	0.790647	3	96.593	1.17792	3	96.0167	1.63062	3	94.7438
	0.2506	99.0208	98.1994	96.0414	95.0451	94.8661	93.2058	89.7215	89.5944	98.5549	99.5328	98.1638	99.2861	97.7962	99.6753	99.6653	99.7798		-0.376483	87.9293	93.0025	95.836	97.7756	100.577	101.767	105.696	106.103			0.2506	98.6074	0.225038	3	98.6797	0.427674	3	96.6456	0.764371	3	96.6765	1.31834	3	95.4847	1.19664	3	95.2114	2.23573	3	93.1289
	0.313283	99.557	98.1261	94.9648	94.135	93.2005	91.0513	87.9535	85.1497	99.112	99.4509	99.5053	99.1729	97.6357	98.8378	99.6163	99.8855		-0.3138	89.0789	93.5617	95.3617	98.1191	100.684	102.79	105.385	106.059			0.313283	98.9185	0.435402	3	98.3924	0.550581	3	96.6722	1.42646	3	95.7466	1.71415	3	94.3731	1.65269	3	94.0591	2.41589	3	92.0709
	0.37595	98.7021	97.1973	93.2162	93.6547	91.0027	88.727	86.7534	81.2168	98.9667	98.1969	99.2454	98.1282	98.0495	99.7095	100.041	98.5909		-0.251133	88.2058	93.8646	95.5788	98.3153	101.08	102.173	105.471	107.767			0.37595	98.8785	0.08821	3	97.4422	0.385034	3	95.7482	1.80615	3	94.7067	1.75249	3	93.3909	2.32954	3	92.8223	3.46408	3	91.2852
	0.438617	99.728	96.904	92.18	91.8429	89.5261	89.0846	85.0128	81.0083	99.0797	99.3525	99.6395	100.157	97.8046	100.094	98.5713	99.3835		-0.188467	87.2744	92.8083	95.5547	97.5139	100.247	101.852	106.137	106.023			0.438617	98.7974	0.634698	3	97.9419	0.730979	3	94.9956	2.33937	3	94.5663	2.79549	3	92.2949	2.75487	3	92.6356	3.73062	3	89.7023
	0.501483	99.9301	97.8573	91.921	91.6997	89.2428	86.644	82.9516	81.5011	98.3693	97.9346	98.1806	99.6605	97.889	99.342	98.8162	100.123		-0.1256	87.9366	93.5927	96.1415	97.015	100.486	102.08	105.359	105.801			0.501483	98.9044	0.512993	3	97.0932	0.803044	3	94.0907	2.04623	3	94.2087	2.72876	3	92.006	2.94333	3	90.8837	4.22917	3	88.5726
	0.564183	99.9922	97.9387	92.3986	91.4974	88.1439	86.0361	81.9348	77.9094	98.2159	97.3527	99.0106	99.2513	98.3872	99.6667	99.404	99.7094		-0.0629	87.8711	92.4588	95.9887	97.9228	99.7691	101.632	104.84	105.098			0.564183	98.7333	0.63277	3	96.9031	0.761652	3	94.5185	2.24725	3	93.4869	2.92787	3	91.5557	3.41578	3	90.4172	4.62689	3	88.2106
	0.627083	99.5415	97.9795	91.8481	90.1323	88.7363	86.3401	80.3041	74.8294	100	96.1642	94.3657	93.1395	88.0351	88.8822	82.2679	82.4395		0	100	100	100	100	100	100	100	100			0.627083	99.1899	0.595726	3	96.5619	0.731168	3	92.5991	0.88658	3	90.7438	1.24472	3	88.1183	0.335367	3	86.9942	0.958763	3	81.2031
	0.6898	99.4948	96.9774	90.4558	88.9273	86.7188	84.3554	80.2583	74.2987	98.3047	96.0741	92.4625	91.4156	85.7046	85.5495	80.2188	79.5597		0.0627167	100.029	98.9515	99.3006	99.7628	98.7138	97.8691	96.5601	97.6246			0.6898	98.5971	0.45785	3	96.348	0.315558	3	91.238	0.62005	3	89.7921	0.812349	3	86.4024	0.349372	3	84.7003	0.427106	3	80.3031
	0.752667	98.6477	96.35	90.2372	87.5621	86.6071	83.7207	77.6292	72.8961	98.3854	94.689	91.842	90.3186	84.2861	84.7718	79.0922	77.3668		0.125583	98.0792	98.7185	98.6495	97.4403	97.5019	96.6768	94.9784	95.6139			0.752667	98.2786	0.249713	3	95.2656	0.542591	3	90.8646	0.495248	3	88.4971	0.910898	3	85.6697	0.7062	3	83.9166	0.448062	3	78.5585
	0.815367	98.2669	96.1708	89.5167	88.0172	85.9804	82.2188	76.2459	69.5034	98.3773	94.2792	90.6347	87.5849	83.4248	82.8064	76.9532	75.2444		0.188283	99.1196	98.0662	96.2942	96.3363	94.6162	94.7827	91.6076	92.2331			0.815367	98.2411	0.0870324	3	95.1909	0.547124	3	90.0692	0.322795	3	87.912	0.166961	3	84.8494	0.75221	3	82.7298	0.275576	3	77.1626
	0.877983	99.2306	95.1931	91.0467	86.8459	85.1734	80.9226	75.1191	69.9867	99.2411	93.4759	88.438	87.7764	82.4284	81.6185	75.1082	75.0771		0.2509	98.2465	98.3069	95.7315	95.6984	93.7917	92.7533	90	89.573			0.877983	98.5011	0.734818	3	94.4885	0.51907	3	89.5255	0.783685	3	86.9093	0.483349	3	83.9487	0.806076	3	81.4874	0.295632	3	75.8061
	0.940667	100	95.5597	88.8448	85.4723	83.7397	80.2342	73.8915	69.2191	97.0453	93.2465	89.2261	87.3324	81.2294	79.6701	73.9326	72.1356		0.313583	98.0864	97.6002	95.5466	93.932	92.283	92.2882	88.643	87.8648			0.940667	98.0328	0.983578	3	94.6792	0.722614	3	88.8666	0.201557	3	86.4207	0.537271	3	82.887	0.828921	3	80.1519	0.257686	3	74.6161
	1.0035	99.2928	95.7797	87.3796	84.4443	83.0872	78.8933	72.3067	66.3666	97.5862	91.6728	87.1049	83.9718	80.3259	78.6789	72.2263	71.616		0.376417	98.9668	96.9323	94.783	92.3373	91.1205	90.0304	87.0614	87.0641			1.0035	98.2563	0.525594	3	93.7698	1.18636	3	87.5264	0.295063	3	84.7288	0.538342	3	82.242	0.960224	3	79.2758	0.493665	3	73.326
	1.06615	98.2591	95.7064	88.2377	84.933	82.2115	77.445	71.528	66.4045	97.7719	92.4596	85.9814	83.9108	78.958	76.7305	71.4997	70.0572		0.439067	97.5844	97.5691	93.1672	91.6994	89.554	88.7282	85.5229	83.8879			1.06615	97.7554	0.295704	3	94.1836	0.94264	3	87.1325	0.65174	3	84.3371	0.30702	3	81.2358	1.14275	3	78.0506	0.984705	3	72.6284
	1.1288	97.6451	95.2583	87.2905	83.7533	81.5505	76.8014	70.2547	64.6039	98.0383	91.4515	85.4532	83.3798	78.4176	76.3459	70.4874	67.7499		0.501717	98.4139	95.4877	92.1704	91.2659	88.8861	86.665	83.9499	82.8648			1.1288	97.6419	0.229745	3	93.4368	1.10196	3	86.4237	0.532929	3	83.4506	0.158292	3	80.7391	1.17812	3	77.3781	0.81512	3	71.1837
	1.1916	97.0234	95.4049	85.8172	82.2365	81.2672	76.3991	68.6149	64.1869	98.1836	91.8367	83.9775	83.1186	78.2234	75.4486	69.5649	65.742		0.564517	97.9919	95.4178	92.1463	89.7121	88.1359	85.5488	83.293	79.8754			1.1916	97.7208	0.354875	3	93.4302	1.04753	3	85.5238	0.821216	3	82.8961	0.33561	3	80.0165	0.919566	3	76.4685	0.609887	3	70.344
	1.25428	98.2203	94.2236	85.4205	81.9331	80.1854	75.9074	67.3965	61.8366	97.2633	92.1892	85.5119	83.4233	76.6613	74.9274	68.675	64.8349		0.6272	98.0282	95.5421	91.5836	88.9598	87.5835	85.7602	81.0372	78.9324			1.25428	97.4516	0.400619	3	93.2057	0.587281	3	85.3671	0.102576	3	82.6594	0.430596	3	78.8632	1.10832	3	75.8857	0.547118	3	69.4885
	1.31722	97.6607	93.9058	83.8339	82.4555	78.7517	74.7631	67.0117	59.837	97.6185	92.0252	84.3297	80.9943	76.5515	73.2781	68.2995	63.4522		0.690133	97.9919	95.9925	90.7958	89.0334	86.7837	84.1958	80.4322	77.1085			1.31722	97.3326	0.307243	3	93.1151	0.563092	3	84.4414	0.387093	3	81.9966	0.50178	3	78.6592	1.19107	3	74.7431	0.840101	3	68.8692
	1.38	97.8783	94.191	83.9553	79.818	77.8846	73.0824	65.9491	59.7233	96.795	89.3451	84.2039	81.9258	76.2222	73.8506	66.7157	62.4483		0.752917	97.8027	94.7577	90.5145	87.6104	86.1159	83.2572	78.9542	76.121			1.38	97.0845	0.40168	3	91.9362	1.40894	3	84.2203	0.157915	3	81.0082	0.62355	3	77.6283	0.74887	3	74.4583	1.01623	3	67.7134
	1.44253	97.2799	93.3111	82.2553	79.3798	77.8589	72.1616	64.694	58.6713	97.2471	89.7959	82.9546	79.8886	75.3863	72.8081	65.8666	63.0207		0.81545	98.0792	95.1227	90.0563	88.1338	85.143	83.1642	78.2887	74.9199			1.44253	97.2177	0.0467868	3	91.9951	1.10665	3	83.3069	0.730332	3	80.1557	0.541856	3	77.2971	0.982077	3	73.6544	1.18437	3	66.7988
	1.50548	97.3187	93.0178	82.8625	80.2899	76.9574	71.7236	63.7505	57.1645	97.8445	90.4762	82.1414	79.1921	74.5926	71.6971	64.7645	61.277		0.8784	97.0314	94.7965	89.0916	86.1057	84.2444	81.9212	77.191	73.968			1.50548	97.3473	0.279188	3	91.9144	0.752541	3	82.8469	0.402956	3	80.137	0.507211	3	76.6771	1.1313	3	72.8309	1.12053	3	66.2581
	1.56825	97.0234	92.7733	82.4334	78.7141	76.7256	70.1681	62.2572	57.1171	97.8849	89.9516	81.3113	77.9209	74.4068	71.3297	65.6054	60.6429		0.941167	97.0533	95.2314	88.5289	86.4573	83.692	80.5513	76.0242	73.1228			1.56825	97.2647	0.312606	3	91.262	0.820735	3	82.2611	0.506012	3	79.0681	0.784703	3	76.2604	0.964306	3	72.0405	1.33443	3	65.5537
	1.63093	97.6451	92.757	81.9963	78.3265	76.1762	70.1949	61.1488	57.3635	97.1422	89.8451	81.4203	77.8861	72.9629	70.3726	64.5114	60.7221		1.00385	97.89	93.8568	88.0949	85.7704	83.3127	80.2554	75.4451	72.5712			1.63093	96.9916	0.427488	3	91.2857	0.84075	3	82.2669	0.582866	3	78.8537	0.758098	3	75.4008	1.24553	3	71.2061	0.923812	3	64.6957
	1.69383	96.9068	93.2459	81.0249	76.3546	74.5622	68.9254	60.5442	54.8143	96.6497	88.0338	81.2945	77.3637	72.8109	69.5266	63.8583	58.5645		1.06675	97.2352	94.3849	87.1785	84.1675	82.5377	79.9763	74.8574	70.4537			1.69383	96.9427	0.180401	3	90.9485	1.53594	3	81.8583	0.702969	3	77.3735	0.591062	3	74.54	0.99197	3	70.3403	1.12773	3	63.948
	1.75653	96.3084	91.7631	81.4053	76.5484	74.1587	67.8259	60.6358	53.895	98.2239	88.1567	80.3052	76.8762	72.1861	69.7915	62.1847	57.675		1.12945	97.2424	93.6005	86.5273	83.2188	82.2492	78.987	72.809	70.258			1.75653	96.8411	0.697463	3	90.0654	1.0464	3	81.1865	0.458862	3	77.3928	0.687006	3	74.134	1.11761	3	69.8112	1.152	3	63.1499
	1.81918	96.6581	92.1297	81.0249	75.8743	73.4032	67.3878	58.3914	53.4022	95.2773	88.0502	79.4165	75.8314	71.6795	68.9711	61.9969	57.1642		1.1921	97.9555	93.0491	86.7765	83.3333	80.559	77.5579	72.8522	68.9235			1.81918	95.9051	0.403488	3	90.3256	1.20101	3	80.4445	0.515461	3	76.7571	0.904328	3	73.7188	1.27834	3	69.3523	1.25874	3	62.1893
	1.8819	96.5882	91.6164	79.592	75.3518	73.2572	67.5308	58.4555	52.9473	95.5195	86.9437	78.8044	75.8402	71.0969	67.8687	61.0336	57.3932		1.25482	96.8714	93.2044	85.1688	82.6219	79.7428	76.8223	72.3941	68.0071			1.8819	95.7321	0.445707	3	89.3507	1.35075	3	79.7013	0.552061	3	76.4168	0.832872	3	72.9181	0.968553	3	68.8775	1.18173	3	61.5554
	1.94463	95.7255	90.6876	79.0577	74.5344	72.2442	65.4658	56.8523	51.3647	95.7778	86.3208	79.2152	74.9521	70.2947	67.9371	60.4784	55.9577		1.31755	96.7186	93.4141	85.1608	82.5401	80.6744	76.1881	71.2965	66.9039			1.94463	95.6908	0.0627408	3	88.7947	1.29363	3	79.5663	0.432256	3	75.4667	0.733436	3	72.2526	1.1328	3	68.1104	1.57933	3	60.8907
	2.0073	95.6944	90.2721	78.8715	74.2395	71.2311	64.7148	56.2844	51.3741	96.6255	87.5092	77.3371	74.334	69.9316	67.2364	60.8866	55.0947		1.38022	96.5803	92.2724	84.5016	81.2807	78.7781	76.4417	70.4754	65.7295			2.0073	95.9848	0.320819	3	89.0963	0.823666	3	79.1328	1.11979	3	75.2496	0.963256	3	71.8158	1.29021	3	67.5786	1.76056	3	60.7827
	2.0699	95.9975	90.9321	78.9201	73.321	71.4715	65.287	55.5332	51.4973	95.7778	87.5748	77.3707	73.8029	69.501	66.1084	60.1355	54.8305		1.44282	97.126	92.8782	84.7106	81.1989	78.6462	75.9936	69.8358	65.952			2.0699	95.7014	0.196766	3	89.2967	0.970125	3	78.5975	0.63595	3	74.6492	1.09611	3	71.255	0.956324	3	66.9283	1.25324	3	59.87
	2.13258	95.6089	91.2579	78.0215	72.3519	70.2953	63.4543	54.9743	49.1187	96.3268	85.9766	76.7083	73.7158	69.6276	65.8605	59.7681	54.8129		1.5055	96.8786	92.2491	83.537	80.929	78.4813	75.0719	70.2593	64.6975			2.13258	95.9028	0.217202	3	88.8312	1.53954	3	78.0718	0.802108	3	73.7001	0.773923	3	71.0288	1.0846	3	66.1756	1.66952	3	59.3941
	2.19527	95.3369	89.7425	78.6611	73.203	70.2181	64.0533	53.9941	49.0902	96.0846	87.4109	77.1527	73.8203	69.2308	65.7665	58.3639	54.6808		1.56818	96.8859	91.0609	83.0386	80.5692	77.6486	74.6237	68.7986	64.0125			2.19527	95.6902	0.216819	3	88.5375	0.674238	3	78.3554	0.625111	3	73.8906	0.418712	3	70.6427	0.961468	3	66.0198	1.21506	3	58.3861
	2.2579	95.3991	90.9565	77.0744	72.1497	69.6686	63.0163	53.701	48.0004	95.35	86.1077	77.0521	72.4708	69.6107	64.4334	58.4946	53.3333		1.63082	96.1874	91.255	83.3842	80.3484	77.0632	73.0509	68.427	63.8523			2.2579	95.1338	0.241187	3	88.6165	1.40227	3	77.5196	0.456462	3	72.9942	0.690214	3	70.3196	0.68013	3	65.3312	1.65762	3	58.0496
	2.32062	96.3006	90.7528	77.8758	72.057	68.8616	62.9805	52.9681	48.152	96.2138	85.3045	75.7106	73.0019	68.0064	63.9549	58.1435	53.5183		1.69353	97.2715	91.5657	83.2556	78.402	76.247	72.5689	67.4417	63.1673			2.32062	95.5767	0.680972	3	88.3042	1.59675	3	77.2432	0.770169	3	73.492	1.00045	3	69.5488	1.1418	3	65.2246	1.77927	3	57.8554
	2.3833	95.9509	90.3536	77.3334	71.0963	69.1106	61.13	52.4093	46.6831	95.689	86.3372	75.9286	72.0007	67.1705	63.8096	58.2497	52.6024		1.75622	95.991	90.2765	81.8489	78.7537	76.0574	71.8163	66.6292	62.7936			2.3833	95.7023	0.139811	3	88.1244	1.1803	3	77.068	0.596217	3	72.53	1.01562	3	69.1992	1.19773	3	64.0548	1.76368	3	57.4971
	2.44632	96.0208	90.9646	77.1149	71.2817	68.1834	62.024	51.4474	46.1808	95.0836	84.8045	74.7883	72.0442	66.8665	63.5789	57.0904	52.4262		1.81923	95.78	90.7968	80.8923	78.5656	76.0739	71.698	66.1798	61.0409			2.44632	95.0315	0.586799	3	88.0036	1.78225	3	76.5454	0.896509	3	72.3964	0.76575	3	68.7998	1.33038	3	64.1547	1.42575	3	56.3003
	2.5089	95.6866	90.1662	76.8882	69.8155	67.4966	59.941	51.4383	45.8112	95.5195	84.7963	75.0734	72.0094	66.1319	62.9721	56.3883	52.0299		1.88182	95.0888	89.4921	80.7074	78.0586	74.4002	71.2329	65.1772	61.0676			2.5089	95.2109	0.395094	3	87.5328	1.551	3	76.3854	0.661936	3	71.8115	1.09978	3	68.2161	1.45618	3	62.9819	1.75846	3	55.9969
	2.57165	95.5701	90.9402	76.3539	70.2874	67.6253	59.494	50.1557	45.1478	94.7687	83.6817	74.6877	71.3303	66.3514	63.0491	56.3801	51.5896		1.94457	95.569	89.3756	80.426	76.9136	74.2188	70.9285	65.3414	59.1459			2.57165	95.0237	0.273396	3	87.4167	2.09802	3	76.1189	0.767522	3	71.6471	0.89066	3	68.0959	1.16694	3	62.8501	1.8828	3	55.9816
	2.63427	95.2825	88.773	75.7711	68.9981	66.6123	59.637	50.2931	44.6929	93.808	83.6817	74.6793	69.9286	65.3128	62.8867	55.4494	51.4663		2.00718	95.6345	89.5076	81.1897	77.1753	74.2848	70.7847	65.1772	60.0712			2.63427	94.5542	0.425743	3	86.4017	1.48006	3	75.9379	0.779293	3	70.5811	1.14955	3	67.2334	1.32499	3	62.6999	1.71693	3	55.1525
	2.69693	95.7566	88.716	76.022	68.3661	66.1401	59.6192	49.5878	44.6077	95.132	83.4522	74.0672	70.3552	65.8195	62.2543	55.2127	50.3214		2.06985	95.3289	89.3833	79.5016	76.8237	72.7925	69.3895	63.9412	59.6797			2.69693	95.3452	0.205749	3	86.3554	1.54357	3	75.5094	0.731049	3	70.4744	1.2531	3	67.1816	1.20539	3	62.6184	1.84572	3	54.7491
	2.75963	95.5001	89.4574	75.0506	68.8632	65.8396	58.1977	48.1037	44.276	94.5427	83.5341	73.0527	68.3789	64.7978	61.7672	54.3228	49.7754		2.13255	95.7727	89.2591	79.4855	75.0327	73.1635	69.2119	63.4399	58.2206			2.75963	94.8814	0.309844	3	86.5237	1.71012	3	74.8983	1.02443	3	69.657	1.04531	3	66.5238	1.24205	3	61.8892	2.16735	3	53.7964
	2.82237	96.526	89.5307	74.6701	67.4897	65.2988	58.153	48.8457	42.9682	93.6546	82.3293	72.6922	68.9187	64.6964	60.5025	54.8208	49.749		2.19528	95.649	88.4591	79.2524	74.6483	72.4792	68.2395	62.8003	58.3808			2.82237	95.0631	0.829336	3	85.9861	2.07962	3	74.6647	1.13727	3	69.7661	1.61552	3	66.307	1.32087	3	61.2272	2.01693	3	54.0542
	2.8851	94.2411	89.27	73.9739	67.0936	64.9038	57.8312	48.0396	42.7123	94.8575	82.7473	72.6754	69.4149	65.4226	60.7503	54.3636	49.2734		2.25802	94.6522	88.7853	78.4325	74.3621	71.6794	68.5439	61.9533	57.331			2.8851	94.3241	0.287021	3	86.0126	1.88294	3	74.0144	0.78501	3	69.2843	1.22885	3	66.3349	1.18124	3	61.2167	2.10219	3	53.394
	2.94788	94.4509	89.1396	74.0225	67.0852	64.0453	56.8568	47.2426	42.5512	93.5416	82.0916	72.2646	68.1525	63.9618	60.2632	53.686	49.5024		2.3208	94.2157	88.8552	78.1431	75.4171	71.7784	68.7384	62.4546	56.6726			2.94788	94.1203	0.290333	3	85.6393	2.03472	3	74.3224	1.28342	3	69.1442	1.55617	3	65.6141	1.61066	3	60.4448	2.12591	3	52.9111
	3.01055	94.1711	88.6345	73.7149	66.3099	64.1054	56.526	47.151	42.1058	93.9049	81.9277	71.9209	68.6227	63.9281	60.1948	53.2288	48.6306		2.38347	95.4671	87.6825	77.9421	74.493	71.3167	67.2248	61.8323	55.9609			3.01055	94.2646	0.239238	3	85.1703	1.93925	3	73.5372	0.886375	3	68.6663	1.37325	3	65.5074	1.49155	3	60.0947	2.03212	3	52.4746
	3.07337	95.6167	87.6242	73.0349	66.8492	64.4488	56.3115	46.5738	41.6035	93.2914	82.2064	72.709	67.8826	62.9486	59.3745	52.7227	49.5024		2.44628	93.9901	88.2417	77.7331	73.8633	71.3497	66.8612	60.363	56.3167			3.07337	94.5225	0.674753	3	85.0921	1.57397	3	73.6536	0.787343	3	68.5749	1.24521	3	64.9106	1.28699	3	59.9245	2.26156	3	52.1049
	3.13615	94.2799	88.3005	73.0592	66.3942	62.8777	55.641	46.3631	40.6937	93.3721	82.4523	72.2646	67.4299	63.9703	59.477	53.1472	48.5425		2.50907	94.4267	87.6359	77.1945	73.6097	71.0199	66.0325	60.1642	55.4626			3.13615	94.0966	0.376672	3	85.5704	1.69934	3	73.6288	0.993768	3	68.2369	1.35813	3	65.0628	1.66885	3	59.5492	2.27751	3	52.3231
	3.19905	95.3447	88.496	72.533	65.7622	63.453	56.1774	45.328	41.3571	93.7838	82.0588	71.1495	66.9075	62.6277	58.9386	52.1757	47.7411		2.57197	94.7322	87.6281	77.3151	73.3235	70.3108	66.0071	61.4088	55.7028			3.19905	94.4262	0.471251	3	85.3077	1.85849	3	72.9344	1.16379	3	67.5113	1.22204	3	64.6971	1.67378	3	59.6133	2.20449	3	51.513
	3.26173	95.6089	88.1131	72.9054	64.8858	63.4959	54.3447	44.4119	40.2293	94.9221	81.7064	71.5352	67.517	62.6024	59.0326	52.339	47.5209		2.63465	94.5722	86.7505	77.3633	72.8165	69.7749	65.5758	59.7148	54.4929			3.26173	94.9471	0.375105	3	85.104	1.85961	3	72.9512	0.831126	3	67.6513	1.63683	3	64.3292	1.30577	3	58.5321	2.2868	3	51.0172
	3.3245	94.5209	88.6019	73.3182	64.8942	62.0707	54.5593	44.6592	39.8029	93.9453	81.5015	70.9902	66.4896	61.6145	58.0841	52.1104	47.7323		2.69742	95.147	86.8981	76.4389	72.702	69.5853	65.9817	59.4468	54.5463			3.3245	94.0381	0.256175	3	84.8569	2.05895	3	72.867	0.979656	3	67.3935	1.76276	3	63.4781	1.6408	3	58.4509	2.35984	3	51.2078
	3.38712	94.7152	89.2374	71.3754	65.2482	62.1823	53.6474	44.1462	39.8597	93.8968	80.395	70.6464	66.3329	61.9607	58.0157	52.2573	46.5346		2.76003	94.6013	86.5797	76.5916	71.7288	68.934	65.7027	58.9628	54.3416			3.38712	94.0988	0.314197	3	84.9536	2.55626	3	72.2629	1.26955	3	67.2684	1.51066	3	63.6335	1.56326	3	58.1129	2.60662	3	50.8006
	3.44978	94.1556	87.9175	72.3387	64.2201	61.0405	53.5044	43.7248	39.2817	94.2117	80.9196	70.4787	66.5158	62.2646	57.9388	50.9756	46.9925		2.8227	95.0087	86.0982	76.6318	72.8901	68.9257	65.0262	58.4961	53.4253			3.44978	93.9518	0.232418	3	84.6419	2.03244	3	72.2923	1.03393	3	66.9512	1.71637	3	63.2387	1.62505	3	57.7718	2.41701	3	49.9707
	3.5125	95.298	87.9746	71.1001	63.6639	61.3668	53.2719	43.1477	38.4666	93.7515	80.813	70.68	65.9673	61.8002	57.4859	51.0572	46.7371		2.88542	93.8737	86.0205	75.3939	71.3445	68.6784	65.0685	57.7787	53.4253			3.5125	94.2617	0.518211	3	84.4597	2.06841	3	71.6518	0.771325	3	66.4276	1.74375	3	63.2092	1.6305	3	57.5913	2.52471	3	49.6759
	3.57518	94.2178	87.2576	71.262	63.3016	60.6885	53.1915	43.3034	37.5569	93.2187	80.8704	71.2585	66.5158	61.2514	57.0928	51.4573	46.7283		2.9481	94.3685	85.6865	76.6801	72.195	68.835	64.2144	57.8047	52.5			3.57518	93.9374	0.362232	3	84.2347	1.85171	3	72.255	0.994702	3	66.4052	1.76078	3	62.7809	1.81824	3	57.2474	2.38753	3	49.9793
	3.63788	95.026	87.5754	70.9544	64.1695	59.9073	52.3333	42.3598	38.1539	94.0664	80.2393	69.9254	65.8628	61.2936	57.7764	50.4204	45.7948		3.0108	94.7177	84.9487	74.9759	71.0664	68.4887	63.5633	57.0441	52.2509			3.63788	94.3778	0.324196	3	84.0293	2.12124	3	71.4696	1.07167	3	66.365	1.43471	3	62.4988	1.94013	3	57.0905	2.57156	3	49.0887
	3.70063	94.1167	87.9257	70.8573	63.605	59.6841	51.6181	42.0575	37.3389	93.6466	79.9689	70.3614	65.4797	61.4625	57.127	50.1184	46.517		3.07355	94.6595	85.4458	75.217	70.9928	67.3345	64.0876	57.0182	53.0961			3.70063	93.9202	0.141103	3	84.4183	2.34474	3	71.4218	0.82495	3	66.2672	1.80781	3	62.0135	1.52902	3	56.5877	2.72691	3	48.7835
	3.76343	93.495	87.2087	70.7844	63.4533	59.272	51.3946	42.7538	36.7703	94.3247	80.1	69.2295	65.4101	60.9474	56.4604	50.4449	45.6099		3.13635	94.6377	85.9584	75.5627	70.8865	68.3403	63.5295	57.4589	51.984			3.76343	93.922	0.239827	3	83.8787	2.06434	3	71.1274	1.20698	3	65.8527	1.5292	3	62.0837	2.03243	3	56.2206	2.71968	3	49.1215
	3.82608	94.6297	87.8116	70.7925	62.8128	59.2376	51.2784	41.801	36.7513	93.469	80.3869	69.2127	64.3479	60.4745	56.6741	49.9388	45.9181		3.199	94.1502	85.3681	75.1206	69.8642	68.0106	63.724	57.0354	51.7794			3.82608	94.374	0.466553	3	84.2115	2.14629	3	70.9878	1.08563	3	65.3233	1.79842	3	61.5711	1.75182	3	56.2812	2.78194	3	48.5402
	3.88915	93.9768	87.4939	68.7606	61.9028	58.6538	51.3231	41.0682	36.0595	93.7434	79.2312	69.372	65.3927	60.7701	55.8452	50.1755	45.8653		3.26207	94.3102	85.4924	74.4132	70.5512	66.8893	62.2188	56.3008	51.7883			3.88915	93.707	0.167294	3	83.6557	2.40318	3	70.5673	1.51128	3	65.2183	1.86594	3	61.552	1.9388	3	56.017	2.76099	3	48.2509
	3.95183	94.039	87.2821	69.0116	62.0966	58.5422	50.7599	40.8575	36.2017	92.5729	79.9115	68.76	64.7223	60.7701	55.9392	49.8408	44.8085		3.32475	93.6481	84.4672	74.2926	70.7965	66.7491	62.7093	56.8539	50.7295			3.95183	93.5582	0.49274	3	83.4598	2.13211	3	70.2138	1.32998	3	64.9013	1.67342	3	61.3417	1.80403	3	55.5816	2.68653	3	48.072
	4.01455	94.4587	87.168	69.7401	61.0011	57.9928	50.3487	40.5185	35.9268	91.9593	80.0508	69.2127	63.6514	60.3226	56.563	48.9183	44.9317		3.38747	93.6845	85.2283	74.7669	70.2241	66.7574	62.6755	55.9983	50.7562			4.01455	93.6973	0.871239	3	83.8772	2.07193	3	70.3315	0.868574	3	64.4355	2.24369	3	61.1138	2.06849	3	55.7398	2.90427	3	47.5276
	4.0774	94.3965	85.9378	68.5825	60.9505	57.7009	49.5441	40.1246	35.3867	93.1299	79.4197	69.0702	64.1564	59.9764	55.8708	49.4326	44.7204		3.45032	93.4881	85.0885	74.0595	70.1178	66.4111	61.8721	55.2118	49.911			4.0774	93.9795	0.424832	3	83.0497	1.91781	3	70.3081	1.48845	3	64.546	2.19702	3	60.8571	2.12267	3	54.8857	2.84265	3	47.5649
	4.14015	93.9924	85.9459	68.4935	60.664	57.0398	49.8033	40.2986	35.0929	92.589	79.8951	69.2379	63.4163	60.1537	55.5802	49.0652	44.6675		3.51307	93.7354	84.5915	73.1752	69.6516	66.4605	62.0159	54.8228	51.1388			4.14015	93.0703	0.46119	3	83.1332	1.75962	3	69.8172	0.975492	3	63.8931	2.01608	3	60.6601	2.25067	3	54.7823	2.67419	3	47.6502
	4.20297	94.4121	86.6792	68.0644	60.2174	57.057	49.4994	39.7856	34.8275	92.9119	79.2312	68.4497	64.0519	59.3346	55.0333	48.7223	44.148		3.57588	94.3757	84.576	74.2444	69.3981	66.4028	61.4578	55.1772	49.5641			4.20297	93.4197	0.496228	3	83.2754	2.17375	3	69.5562	1.30384	3	64.1305	2.2823	3	60.2857	2.19082	3	54.6988	2.91012	3	46.9357
	4.26557	94.0856	85.5059	67.8216	60.6219	57.1772	49.1239	39.3917	34.5148	92.8554	79.1984	68.4833	64.7658	59.1995	55.3239	49.1632	44.1039		3.63848	94.041	84.2731	73.5289	69.0628	66.2957	61.1618	54.4857	50.0534			4.26557	93.5249	0.359275	3	82.643	1.8439	3	69.4382	1.29985	3	64.3452	2.03914	3	60.19	2.08503	3	54.5718	2.95231	3	47.1213
	4.32828	93.0909	86.1985	67.9592	59.7624	57.2373	48.8378	38.2008	34.7801	93.138	78.9362	67.7371	63.6166	59.0391	55.153	48.355	43.8045		3.7012	93.9974	85.3604	73.0466	69.717	64.8941	61.0181	54.1746	49.4573			4.32828	92.8703	0.244472	3	82.7968	2.10897	3	69.0504	1.20399	3	63.5666	2.1821	3	59.8872	1.82473	3	54.2617	2.9085	3	46.0516
	4.3911	94.1945	86.0111	67.174	60.1163	57.0141	48.8915	38.9886	33.5671	92.9039	78.9525	68.3072	63.8516	59.1911	54.307	48.7958	43.7076		3.76402	93.9464	84.3274	73.3682	68.6948	66.0318	60.8067	54.1659	49.0569			4.3911	93.5676	0.37302	3	82.8381	2.06855	3	68.9492	1.25215	3	63.534	1.88818	3	59.8827	1.88781	3	54.0652	2.91975	3	46.5677
	4.45382	93.3706	85.4489	67.0363	59.2062	56.4475	48.1048	38.7138	33.4818	92.9846	78.5673	67.9383	63.4686	58.8196	54.8111	48.5917	43.5315		3.82673	95.0233	84.4362	72.9582	68.8093	65.0012	60.8913	53.8807	48.194			4.45382	93.5236	0.363521	3	82.5819	2.06774	3	68.9224	1.45852	3	63.2392	2.26515	3	59.5975	2.07993	3	54.0077	3.20139	3	46.3188
	4.51663	93.4561	86.3696	66.7854	59.2736	56.1899	47.3896	38.1458	33.2449	92.145	78.6165	68.1479	63.2596	58.524	54.23	47.5304	43.8221		3.88955	93.4008	84.242	73.5691	68.3595	65.2321	60.8828	53.5091	48.5676			4.51663	92.9642	0.412372	3	82.9854	2.29163	3	68.6594	1.25597	3	62.8322	1.94295	3	59.4214	2.17158	3	53.2965	3.17537	3	45.7555
	4.57932	93.394	85.7667	67.2711	58.8776	56.4389	47.6846	37.697	33.2354	91.9189	78.6247	67.3849	62.8069	58.2369	54.6744	47.5794	43.6284		3.95223	94.0629	83.1858	72.8698	67.8852	64.7127	60.0457	53.5177	48.5231			4.57932	92.9725	0.530249	3	82.3704	2.06909	3	68.5134	1.18586	3	62.8573	2.3124	3	59.5845	2.30582	3	53.6444	3.18549	3	45.4494
	4.64197	93.3162	85.0171	67.2873	59.1893	56.1727	46.7817	37.5412	33.1975	92.0239	77.5756	67.4939	62.0843	58.2707	53.837	47.6365	43.7428		4.01488	94.674	84.4129	72.0418	68.6539	65.026	60.3078	53.1461	47.4466			4.64197	93.1537	0.610829	3	81.8097	2.20865	3	68.5712	1.18213	3	62.4396	1.98705	3	59.235	2.10241	3	52.8529	3.25852	3	45.5548
	4.7048	93.8214	85.8318	67.1254	58.1192	55.2799	46.8532	37.2756	32.6289	92.371	78.1165	67.1082	62.685	57.6712	53.948	47.3426	43.1352		4.07772	94.4121	83.7916	73.2717	68.5312	64.8941	59.2423	53.1374	48.5498			4.7048	93.2753	0.455394	3	82.0493	2.22848	3	68.6942	1.57736	3	62.4712	2.45326	3	58.7431	2.37027	3	53.0519	3.35023	3	45.2905
	4.7675	94.9172	85.9948	67.2144	58.4899	54.4471	46.3883	36.9183	32.2782	92.5809	77.3953	67.2256	62.7111	57.9245	53.6233	46.7793	42.5187		4.14042	92.6295	83.5586	71.7203	67.599	64.7869	58.9633	53.5869	48.0516			4.7675	93.4001	0.759352	3	81.8839	2.48963	3	68.6344	1.41433	3	62.4945	2.25207	3	58.4949	2.51789	3	52.5829	3.31717	3	44.8511
	4.83027	94.2489	85.3837	67.0444	58.6332	54.4214	46.442	35.8373	31.9181	92.3065	78.2477	67.0747	62.5805	57.6036	53.4353	46.9916	42.7389		4.20318	92.9351	83.9158	72.1543	68.1223	64.4653	59.5637	52.299	47.8203			4.83027	93.064	0.600036	3	82.3734	2.13415	3	68.38	1.32047	3	62.665	2.3525	3	58.4124	2.56969	3	52.4367	3.21182	3	44.7545
	4.89293	93.7281	85.3511	65.984	58.195	55.1425	46.585	36.3503	32.0792	92.3226	77.4855	66.8651	61.9624	57.4939	53.2388	47.4161	43.0031		4.26585	93.6336	83.2246	72.0096	67.648	64.1933	59.2677	52.809	47.0996			4.89293	93.0074	0.406142	3	81.8754	2.31619	3	67.7852	1.3842	3	62.0375	2.24049	3	58.2479	2.04562	3	52.3653	3.11586	3	44.8567
	4.9558	93.5727	85.1882	65.134	57.622	54.5158	45.9682	35.6358	31.141	91.4265	76.7724	67.1585	62.2845	57.7219	53.8284	46.7548	42.3602		4.32872	92.3821	83.2557	71.455	67.3209	63.3853	58.7942	51.599	46.6904			4.9558	93.0401	0.822179	3	81.5653	2.49887	3	67.5514	1.52186	3	62.0329	2.47725	3	58.071	2.16048	3	52.3421	3.33482	3	44.2397
	5.0185	93.7515	83.2899	65.7249	57.1332	53.8977	45.4854	35.9289	31.7002	91.4103	77.1166	66.8064	61.1875	56.5566	52.8115	45.8731	41.7173		4.39142	93.6045	83.5508	71.3666	66.634	63.443	58.9971	51.9188	47.0285			5.0185	92.8954	0.745421	3	80.8221	1.88644	3	67.6605	1.42934	3	61.1882	2.34129	3	57.4958	2.395	3	51.7577	3.35867	3	43.9571
	5.08117	93.2074	84.8542	65.3283	56.7877	53.5371	45.8967	35.59	31.1694	91.9674	77.5346	66.253	62.3368	57.5445	52.3244	46.0936	42.2809		4.45408	94.2157	83.7294	71.7926	67.0429	63.5254	59.1071	51.6508	46.3256			5.08117	93.2805	0.780098	3	81.4	2.12294	3	67.3492	1.58123	3	61.5733	2.57104	3	57.8094	2.54649	3	51.7747	3.24664	3	43.8657
	5.14383	93.4794	84.4305	65.1987	56.5939	54.1552	45.0742	35.3335	30.961	91.2085	77.4363	65.7751	61.5706	57.1815	53.0679	46.0364	42.1841		4.51675	93.2916	83.9702	71.045	65.9634	63.5502	58.2699	51.5903	45.6139			5.14383	92.558	0.689605	3	81.3606	2.06376	3	66.8359	1.35916	3	61.2124	2.56933	3	57.5893	2.11029	3	51.723	3.51536	3	43.5998
	5.20652	94.5442	84.3001	64.543	56.6698	52.9705	44.8596	35.0037	30.0133	92.5083	77.7887	65.8841	61.2137	56.9535	52.3671	46.167	42.2897		4.57943	93.6045	82.7198	70.8842	66.8875	64.0778	58.5743	51.0717	46.0053			5.20652	93.4674	0.590651	3	81.3026	1.89734	3	66.6617	1.49896	3	61.334	2.72835	3	57.2558	2.56589	3	51.401	3.53093	3	43.64
	5.2691	93.6737	84.1128	64.0978	56.417	52.773	45.1189	34.9212	31.0368	92.2096	76.7806	66.5968	61.0134	56.7002	52.2218	46.4609	41.779		4.64202	94.1211	82.8363	70.9325	66.0451	63.2616	57.9401	51.4866	46.5747			5.2691	92.9419	0.42267	3	80.8549	2.15562	3	66.7803	1.60434	3	60.9268	2.57912	3	57.0424	2.56939	3	51.2276	3.27774	3	43.7163
	5.33187	93.5727	83.2328	64.2354	56.6276	51.966	44.4663	34.4082	30.525	92.3065	76.4609	66.2363	60.9786	56.5651	51.8117	45.7425	41.2065		4.70478	93.6336	82.1994	71.8489	66.6094	63.2781	58.3545	51.2532	45.7829			5.33187	93.2194	0.460357	3	80.5146	2.06576	3	66.5425	1.42867	3	60.7046	2.2789	3	56.5002	2.59931	3	50.8959	3.47801	3	43.3432
	5.39467	93.5416	84.7075	64.5187	56.1136	52.9619	44.2786	34.2983	30.2691	92.1934	76.5757	66.0518	60.9438	56.8015	52.4953	45.7425	42.2721		4.76758	92.7023	82.2616	71.463	66.2823	63.1132	57.7372	50.8557	46.6192			5.39467	92.8294	0.39105	3	80.9771	2.3713	3	66.471	1.26562	3	60.538	2.44576	3	56.9	2.30263	3	50.9738	3.5097	3	43.272
	5.45742	92.7489	83.9824	63.2316	55.9619	52.1377	44.4037	34.1151	29.7953	92.4841	76.0102	66.4291	61.5532	56.7762	52.4611	45.4078	41.3122		4.83033	92.6368	83.4887	71.0209	66.7812	63.2121	57.4328	51.4347	45.5783			5.45742	92.9022	0.295734	3	80.5339	2.36335	3	66.5563	1.95722	3	60.955	2.72657	3	56.7158	2.62588	3	50.9731	3.44459	3	42.9841
	5.52008	93.5727	83.4936	64.114	55.0687	51.4423	43.9478	33.941	29.7858	92.0481	76.2069	65.6997	60.3779	56.8859	51.8031	45.5384	41.3562		4.893	92.9715	82.7897	70.5064	65.9552	62.1073	57.2721	50.8038	45.9253			5.52008	92.7574	0.443297	3	80.3666	2.16595	3	66.4893	1.64738	3	60.3228	3.01767	3	56.6332	2.92676	3	50.52	3.48368	3	42.8083
	5.58297	93.0054	84.0639	63.6283	54.8327	52.112	42.8929	33.6662	29.3025	92.2338	76.6167	65.8338	60.7	56.3033	51.9057	45.5302	41.3562		4.95588	94.1211	82.7353	70.3617	66.1923	61.9754	57.2298	50.3284	45.516			5.58297	92.9964	0.437715	3	80.9237	2.2276	3	66.2944	1.68807	3	59.9835	2.79005	3	56.5413	2.62869	3	50.1462	3.7835	3	42.6189
	5.64567	92.1582	83.7298	64.4054	55.3552	51.1332	43.4203	33.4372	29.2646	91.1278	76.9855	66.6387	60.5781	56.4637	51.6493	44.8526	41.1449		5.01858	93.5244	82.0596	70.4502	65.2437	62.0331	56.9762	50.0691	45.1335			5.64567	92.2386	0.665762	3	80.6661	1.97121	3	66.444	1.12497	3	59.978	2.5137	3	55.9058	2.60932	3	50.0618	3.46825	3	42.4406
	5.70828	93.6737	83.5343	63.7578	54.6136	52.3008	43.0449	33.5562	29.3594	90.9421	76.1659	65.4062	60.5259	55.974	51.4186	45.0241	41.5059		5.0812	94.6668	81.8111	70.4662	65.5954	62.3464	57.103	49.9136	44.6797			5.70828	92.7741	0.916022	3	80.131	2.14554	3	65.9673	1.46476	3	59.9287	2.91165	3	56.3104	2.41787	3	49.8795	3.58524	3	42.2609
	5.77095	93.1297	83.2899	63.0373	54.6473	51.0646	43.1522	33.5654	29.1888	90.6757	76.3872	64.9619	59.8468	55.8811	51.1536	44.3791	40.4227		5.14387	92.986	82.215	69.5338	65.4727	61.4313	57.0269	49.4296	44.8043			5.77095	92.3123	0.818307	3	80.6281	2.14336	3	65.646	1.73765	3	59.3511	2.5845	3	55.8453	2.74991	3	49.7227	3.45528	3	42.0605
	5.83367	93.2541	84.0965	63.1426	54.7737	51.3736	42.2492	33.6845	28.6676	91.2489	76.3708	64.7439	60.1254	55.2732	51.5211	44.9261	40.7045		5.20658	93.3498	81.8189	69.5579	66.1187	61.8435	56.9762	49.7494	44.6797			5.83367	92.4478	0.611237	3	80.542	2.25143	3	65.3164	1.44888	3	59.5842	2.63502	3	55.5231	2.47101	3	49.5216	3.75697	3	42.1096
	5.89647	94.2955	83.3469	62.8187	53.6614	51.2448	42.2403	32.7959	28.6676	92.0804	75.6905	64.9535	60.5955	55.2309	51.3246	45.1221	40.7574		5.26938	92.9424	81.6713	69.6463	65.35	61.6539	56.342	49.7666	44.1548			5.89647	93.3389	0.657016	3	79.7133	2.21876	3	65.2622	1.5078	3	59.4574	3.07092	3	55.598	2.62569	3	49.532	3.79966	3	41.968
	5.9591	92.3525	83.8928	63.1021	54.0912	51.0646	42.0973	32.402	28.696	91.6848	75.502	64.9032	60.2211	55.5856	51.4271	44.2077	40.3435		5.33202	93.7791	81.85	69.1559	64.5077	60.9696	56.4096	49.879	43.7367			5.9591	92.2223	0.280373	3	80.2156	2.47701	3	65.4766	1.56295	3	59.225	2.72242	3	55.6506	2.66675	3	49.2874	3.69197	3	41.6069
	6.02205	92.337	83.518	62.5921	54.6389	50.7984	42.2314	32.5027	28.3832	91.1036	75.3053	64.5007	60.1689	55.3069	50.7691	44.5996	40.3611		5.39497	92.7532	81.648	68.8424	64.5568	60.9366	56.1475	49.7753	44.1815			6.02205	92.0258	0.469155	3	80.0303	2.45018	3	65.2608	1.8008	3	59.7746	2.85804	3	55.4333	2.71317	3	49.2537	3.69542	3	41.6328
	6.08473	92.5546	83.0292	61.8554	53.3581	50.807	42.0615	32.5394	27.7293	90.7403	74.5841	64.3582	60.3604	54.9185	50.5726	44.0362	40.3611		5.45765	93.4735	81.6092	70.008	65.35	61.2334	56.0545	49.4296	43.3541			6.08473	91.9699	0.615077	3	79.2619	2.48004	3	65.0508	2.07395	3	58.8635	2.84663	3	55.3562	2.76148	3	49.1344	3.73819	3	41.3621
	6.14742	93.596	83.8765	62.1711	53.7541	50.1631	41.7218	31.8706	28.08	91.2812	75.1332	65.0289	59.8903	55.7376	50.658	44.0852	40.4668		5.52033	92.6513	81.3995	69.6543	65.5218	61.5714	55.8092	48.9455	43.7544			6.14742	92.3203	0.67862	3	80.0199	2.57599	3	65.0849	1.69866	3	58.9261	2.75027	3	55.3816	2.91555	3	48.7565	3.63897	3	40.9827
	6.21012	91.3344	81.7582	61.7178	53.1811	49.648	41.8291	32.3928	28.4212	92.5163	74.8545	63.9809	59.6639	55.4336	50.5298	44.4118	40.0264		5.58303	93.75	82.0907	69.4212	64.4177	61.2087	55.6401	48.6603	43.1317			6.21012	92.4439	0.620663	3	79.3296	2.24027	3	64.8899	2.1426	3	58.8668	3.07843	3	55.1113	3.06543	3	49.0709	3.83	3	41.499
	6.27285	92.1582	83.241	61.3778	53.0294	49.5106	41.2927	31.8157	27.7009	90.8775	76.5265	64.1486	59.2635	54.8763	50.658	43.7668	39.7798		5.64577	93.4299	81.283	68.2878	64.0007	60.1204	55.1158	49.032	43.1495			6.27285	91.6216	0.383991	3	79.835	1.93892	3	64.5377	1.94648	3	58.4892	2.95416	3	54.6159	2.87531	3	48.7798	3.89537	3	40.9245
	6.3355	91.995	82.524	61.8554	52.785	50.2146	41.2837	31.4951	27.3218	91.4669	75.5102	63.8719	59.8119	54.9354	50.6153	43.8321	39.5244		5.70842	93.7063	80.6928	68.7379	64.6467	60.6563	55.175	48.2022	42.5267			6.3355	91.7055	0.154582	3	79.397	2.06005	3	64.5109	1.7471	3	58.4297	2.94227	3	55.0599	2.83404	3	48.7513	3.88669	3	40.7242
	6.39817	91.1712	82.4833	61.8473	52.9283	49.5192	41.0066	32.063	27.5398	91.6848	75.4446	63.9138	59.3592	54.8594	50.4273	43.3995	39.9031		5.77108	93.1315	82.2072	68.9389	63.559	60.5903	54.8622	48.2368	42.4555			6.39817	91.5714	0.206282	3	79.3254	2.06377	3	64.4686	1.69639	3	58.4574	2.96638	3	54.6846	2.93307	3	48.7372	4.06417	3	40.7088
	6.46103	91.8629	82.5892	61.2402	52.3216	49.2359	40.8099	31.3302	27.3218	91.3215	75.6004	64.5846	59.0458	55.0536	50.4102	43.1872	39.6301		5.83395	92.8405	81.1587	68.0627	63.8535	59.9225	54.7945	47.7182	42.6157			6.46103	91.9162	0.35966	3	79.7181	2.11159	3	64.2781	1.67254	3	57.9871	3.01228	3	54.4131	2.82234	3	48.4461	3.96526	3	40.5406
	6.52367	91.5987	83.2654	61.3373	52.7092	48.6693	40.6043	31.5775	27.6156	91.0067	75.8626	64.1737	59.3592	55.1803	50.0513	43.1872	39.6037		5.89658	93.6409	80.1025	68.0145	64.1151	60.3182	55.0313	47.9862	42.073			6.52367	91.6843	0.418154	3	79.5571	2.13702	3	64.3692	1.8095	3	58.1281	2.84074	3	54.1812	2.93669	3	48.0606	3.86072	3	40.5626
	6.58642	91.9329	81.3427	60.7788	52.2542	48.3602	40.506	31.1286	27.3313	90.8129	75.2479	63.4694	59.0023	55.2563	49.5727	43.326	39.5949		5.95933	92.6295	81.2519	68.4244	63.3628	60.3018	54.3379	48.2109	42.331			6.58642	91.6511	0.426511	3	78.9754	1.88626	3	63.9831	2.0147	3	57.9311	3.01628	3	54.3014	3.1904	3	47.8796	3.86228	3	40.4074
	6.64912	92.5157	82.0759	60.1716	52.6671	48.2486	40.2646	31.1469	27.2934	92.0562	74.8955	63.9893	59.5072	54.471	49.6496	43.3505	39.269		6.02203	92.6368	81.2675	68.6897	64.5159	60.1946	54.7607	47.796	42.7135			6.64912	92.6139	0.353758	3	78.9625	2.12694	3	63.8977	2.1253	3	58.3379	2.99414	3	54.0849	3.26381	3	48.0587	4.1182	3	40.413
	6.712	93.0364	81.913	60.8759	51.5295	47.7507	40.2467	30.8721	26.5732	91.0955	75.2233	64.0983	58.3232	54.8679	49.5385	43.0321	39.2602		6.08492	92.615	80.1724	68.9389	62.8721	60.343	54.7692	47.5108	41.9751			6.712	92.443	0.675339	3	78.9709	1.97268	3	64.1768	1.92886	3	57.6349	3.34403	3	53.9522	3.34761	3	47.9227	4.04672	3	40.2441
	6.7746	91.35	82.7114	60.973	51.7317	48.0512	39.9338	30.5423	26.9996	90.6353	76.0675	64.3833	58.5931	54.5977	50.1111	43.1301	38.635		6.14752	92.0838	81.05	68.0547	63.1338	60.244	53.8897	46.9922	41.9929			6.7746	91.3661	0.426617	3	79.6634	1.93739	3	63.9103	1.57713	3	57.5415	3.09568	3	53.8716	3.17171	3	47.6428	3.93669	3	39.8384
	6.83728	91.723	82.3855	60.3092	51.757	48.1799	40.0143	30.0843	26.4594	91.0713	75.1578	63.5197	58.9065	54.3866	49.8291	43.2688	39.4804		6.2102	93.4808	81.3762	68.9711	63.7553	60.2523	54.8537	47.6923	42.669			6.83728	91.5363	0.234009	3	79.2308	2.1364	3	63.5539	1.88327	3	57.7062	3.14604	3	53.9322	3.19794	3	47.725	3.98574	3	39.9077
	6.89998	92.2049	81.6604	60.4792	51.2682	47.8623	38.8879	30.3316	26.3457	90.3609	74.9037	64.1234	58.5757	54.6483	49.9915	43.1301	38.6702		6.2729	91.8292	79.7375	68.0868	63.1747	59.4608	54.3886	47.191	42.0018			6.89998	91.3388	0.535255	3	78.8293	2.02582	3	63.8493	1.87163	3	57.3648	3.22762	3	53.886	3.27998	3	47.2374	4.25454	3	39.9583
	6.96263	92.4147	82.133	60.2688	51.0238	47.9481	39.3438	30.2125	26.431	90.3851	74.2234	63.3101	58.6801	53.6435	49.7949	42.3871	38.8639		6.33555	91.6545	80.1569	67.8055	62.6922	60.0297	54.3548	46.8453	42.0107			6.96263	91.5988	0.618733	3	78.364	2.29084	3	63.425	1.85631	3	57.4354	3.39984	3	53.4121	3.08996	3	47.3097	4.07575	3	39.4693
	7.02553	92.0417	80.7479	59.1273	51.4199	47.7163	39.4869	29.8369	26.4215	90.7484	75.0512	62.8658	58.4451	54.5132	49.8975	42.8525	38.635		6.39845	91.8583	80.0482	67.6447	63.0847	59.6752	54.7776	46.6638	41.468			7.02553	91.6561	0.455602	3	78.564	1.77364	3	62.7008	2.01721	3	57.44	3.22496	3	53.6165	3.17934	3	47.3437	4.00777	3	39.4934
	7.08822	91.2178	82.1167	59.8964	50.0632	47.5618	39.0309	29.8278	25.9666	89.9734	74.1415	63.5114	58.863	54.3443	49.3164	42.8035	38.3355		6.46113	92.564	80.9646	67.0096	62.594	58.9496	54.118	47.1046	41.0765			7.08822	91.4167	0.896218	3	78.7765	2.39156	3	63.5823	2.14886	3	57.2143	3.74462	3	53.5719	3.26981	3	47.1587	4.21025	3	39.5
	7.15093	91.9173	82.1004	59.9369	50.8637	47.0725	38.7717	29.9652	25.5402	90.7484	75.8299	63.9054	58.8717	54.2346	48.9318	42.4198	38.1506		6.52385	92.4476	79.5433	67.5965	62.316	58.694	53.5261	46.9231	41.2722			7.15093	91.7408	0.529441	3	79.0465	1.81197	3	63.336	1.82048	3	57.1242	3.23044	3	53.1825	3.26659	3	46.5889	4.01179	3	39.3257
	7.21362	91.9639	81.6686	59.0788	50.8553	47.5189	38.879	29.7178	25.635	90.9018	74.3628	63.0167	58.6627	53.4493	48.8464	42.2402	38.3708		6.58653	92.2075	80.3355	67.701	62.5368	59.2877	53.56	46.7675	41.4235			7.21362	91.7177	0.418554	3	78.3074	2.12909	3	63.1744	2.4114	3	57.079	3.23451	3	53.218	3.22568	3	46.9739	4.23779	3	39.3447
	7.27642	90.6039	81.6523	59.7507	50.3581	47.6992	38.5661	29.672	25.3696	88.2134	74.666	63.3353	58.4102	53.6182	48.8891	42.6402	38.5117		6.64933	93.2698	79.9161	67.5322	62.8394	59.535	54.2618	46.7416	41.3968			7.27642	89.9487	0.876259	3	78.3772	2.02851	3	63.3304	2.06532	3	56.8155	3.36367	3	53.1338	3.00759	3	46.6217	4.15408	3	39.1574
	7.33915	91.4821	82.2226	59.775	49.507	47.0209	37.9045	29.214	25.5781	89.8523	74.5185	63.0921	58.5321	53.9644	49.5385	42.1259	38.3708		6.71207	93.197	79.7763	67.5563	63.052	59.2382	53.9827	46.828	41.4591			7.33915	91.0327	0.59578	3	79.1912	2.37057	3	62.9466	1.79061	3	56.7851	3.79941	3	53.0286	3.23241	3	46.9531	4.6607	3	38.9255
	7.40182	92.6867	81.2205	59.4835	50.3076	47.2356	38.6555	28.8292	25.4549	90.5223	73.9612	62.8742	58.6627	53.7195	49.3505	42.681	38.1506		6.77473	92.1129	80.2112	66.3746	62.2996	58.9661	52.8835	45.8427	40.8185			7.40182	91.4684	0.639464	3	77.9414	2.1247	3	62.951	2.02445	3	56.7847	3.33244	3	52.9306	3.08557	3	46.9547	4.27137	3	38.9189
	7.46487	93.2307	80.862	59.2811	49.8188	46.4801	38.137	29.1774	25.2274	89.9007	73.7399	62.8155	58.1403	53.6182	48.7951	41.832	38.2122		6.83778	91.8146	80.1491	66.8328	62.455	59.2299	53.3316	46.3699	40.6228			7.46487	91.8136	0.992748	3	77.805	2.11688	3	62.9256	2.13659	3	56.5021	3.48338	3	52.8511	3.47806	3	46.4135	4.26075	3	38.8729
	7.52755	90.9147	81.4404	58.7226	49.3385	46.4629	38.0565	29.4613	25	90.3124	74.707	62.8322	57.9923	53.1369	49.0856	42.0442	38.3267		6.90047	91.4508	79.9239	66.9453	62.2506	59.1475	52.8327	46.4131	40.3025			7.52755	91.237	0.647261	3	78.227	1.94982	3	62.4824	2.07709	3	56.5544	3.81928	3	52.6464	3.43724	3	46.4469	4.29036	3	38.9836
	7.59023	91.723	80.3894	57.6054	50.0801	46.317	37.7078	28.8842	25.1232	90.5223	74.3791	62.8658	58.0881	52.9764	48.9489	41.9789	37.8336		6.96315	91.9965	78.7356	66.6961	62.6022	58.6446	52.7905	45.8081	40.9075			7.59023	91.6783	0.654883	3	78.0548	1.86007	3	62.4347	2.67242	3	56.6808	3.47668	3	52.4289	3.38175	3	46.1949	4.32979	3	38.7925
	7.65312	91.8784	81.6767	58.3583	49.7598	45.716	37.2787	28.4262	24.7631	90.0783	74.0841	63.2179	58.1229	52.9258	48.684	41.5218	37.9128		7.02603	92.1784	79.8928	66.1093	62.455	58.6198	52.6467	45.7908	40.427			7.65312	91.7228	0.90784	3	78.1422	2.20738	3	62.6101	2.29947	3	56.5257	3.53658	3	52.2364	3.58218	3	45.9523	4.43468	3	38.3549
	7.71562	91.2722	81.0249	58.1316	48.9762	46.0422	37.2787	28.2796	24.8958	90.1671	74.3136	62.4382	58.1665	53.424	48.5387	41.9871	38.1858		7.08853	93.0588	80.0715	67.3392	62.7167	58.8095	53.1287	45.8686	40.2046			7.71562	91.1016	0.497661	3	78.1567	1.99779	3	62.2505	2.32574	3	56.2736	3.78692	3	52.4398	3.44483	3	45.7657	4.3276	3	38.3689
	7.77825	91.7308	80.8294	57.8078	49.17	45.716	37.7615	28.0781	25.1137	90.7161	74.4529	62.2621	57.0259	53.1791	48.778	41.8238	37.8688		7.15117	92.5568	79.2094	66.1656	61.6372	58.2406	52.0633	45.592	39.5641			7.77825	91.5951	0.473234	3	78.1147	1.90067	3	62.2366	2.54963	3	55.879	3.58845	3	52.0048	3.3438	3	46.1727	4.30592	3	38.351
	7.84102	91.6064	81.1227	58.1559	49.1447	45.5271	37.4039	28.5269	25.199	89.6101	73.2891	63.2598	57.7921	53.0102	47.8807	41.6279	37.5429		7.21393	92.2875	78.891	67.4277	61.719	58.6858	53.1963	46.0761	40.2936			7.84102	91.1098	0.763987	3	77.7495	2.32579	3	62.4012	2.24457	3	56.0632	3.60063	3	51.9433	3.43799	3	45.6332	4.25354	3	38.4008
	7.90372	91.2722	80.8701	58.0021	49.9115	45.6302	36.8496	28.2888	24.7252	90.2075	74.1415	62.0525	57.6702	52.6556	48.1969	41.6442	37.7103		7.27663	91.0288	78.8133	66.9051	61.6781	58.0839	52.4099	45.1599	39.9199			7.90372	91.5128	0.831846	3	78.1979	2.06203	3	61.6232	1.97842	3	56.1937	3.28482	3	51.8539	3.38567	3	45.7991	4.63261	3	38.1857
	7.9665	92.2515	80.699	57.9616	48.4368	45.5872	37.1893	28.0322	24.5451	90.8775	73.8136	62.3711	57.4438	52.7569	48.2054	40.836	37.2611		7.33942	91.7637	80.8326	65.9727	62.316	58.1004	53.4162	45.4365	39.9466			7.9665	91.7085	0.421962	3	77.9824	2.11612	3	61.9598	2.19923	3	55.7521	3.82966	3	51.8266	3.36607	3	45.6671	4.35112	3	37.8538
	8.02937	91.4277	79.5177	57.3059	48.7571	45.2696	36.8049	27.8215	24.7726	90.5385	73.83	62.3879	57.1652	52.284	47.8722	41.3013	37.4637		7.40228	91.1962	78.6424	66.4952	61.3837	57.8366	52.8581	45.2463	40.258			8.02937	91.5222	0.597104	3	77.5113	1.84311	3	61.9049	2.52736	3	55.6215	3.60121	3	51.706	3.56099	3	45.5886	4.55737	3	37.7428
	8.09205	92.3448	80.0228	57.2897	48.6222	44.7802	36.8407	27.7941	24.5167	89.8038	73.2235	62.5723	57.322	52.2081	47.5731	41.0972	37.1995		7.46497	92.3094	78.8133	66.6801	61.5473	58.4549	52.3085	45.6093	39.9377			8.09205	91.2313	0.750125	3	77.1694	2.03738	3	61.6636	2.30806	3	55.7814	3.76821	3	51.3142	3.54269	3	45.2697	4.35652	3	37.6627
	8.15485	90.7127	81.693	57.7431	48.5295	45.1494	36.4116	27.5376	24.0807	90.1025	73.1907	62.5388	56.9824	52.6978	48.0858	41.1381	37.6574		7.52777	92.484	78.5337	65.8923	62.3324	58.3395	52.1985	45.4451	40.1957			8.15485	90.8305	0.458134	3	77.7023	2.46817	3	61.7177	2.09832	3	55.2012	3.45446	3	51.4686	3.35043	3	45.0185	4.36223	3	37.706
	8.21755	91.8318	80.8701	57.055	48.2093	44.9863	35.9825	27.6841	24.5451	89.4971	74.2562	62.2872	57.2958	52.6809	48.2396	41.2442	37.3052		7.59047	92.7896	79.3958	66.8328	61.8744	57.9932	51.928	45.5143	40.1601			8.21755	91.414	1.00806	3	78.0265	1.96468	3	61.509	2.37894	3	55.3488	3.69066	3	51.5433	3.50377	3	44.9944	4.56436	3	37.8248
	8.28023	91.4432	80.4628	57.7026	48.1251	44.7115	36.2864	27.4093	24.1092	89.8926	74.3791	61.868	56.817	52.8498	47.6671	40.6727	37.1819		7.65315	93.2116	78.6657	66.254	61.6945	58.0674	51.8941	45.1167	39.3861			8.28023	91.2054	0.699437	3	78.0585	1.86834	3	61.6468	2.21609	3	55.1939	3.70265	3	51.6014	3.67097	3	45.0993	4.53252	3	37.4045
	8.34303	91.6298	79.2733	56.2374	47.8217	44.6429	36.4205	27.4276	23.9386	90.377	73.6907	62.304	57.4961	52.3347	48.0174	40.0114	36.8824		7.71595	91.8655	79.1317	66.1817	61.6781	57.8531	51.4798	44.8401	39.3861			8.34303	91.3878	0.527772	3	76.9044	1.666	3	61.443	2.79038	3	55.4554	3.95221	3	51.3326	3.60803	3	45.2665	4.52708	3	37.1959
	8.40587	90.1997	80.5687	56.9578	47.9987	44.2737	36.0808	27.0337	23.9575	90.4577	73.2153	62.2202	57.0869	52.1321	48.0516	40.5258	36.4949		7.77878	92.3385	79.0618	66.6399	61.441	57.1193	51.9787	45.1513	39.1103			8.40587	90.875	0.551274	3	77.4832	2.20354	3	61.6767	2.58189	3	55.3943	3.87485	3	51.0541	3.64357	3	45.1703	4.64507	3	37.1871
	8.46852	91.8163	80.5361	55.9702	47.3329	44.5828	35.9378	27.1436	23.7585	89.2387	72.8875	62.3879	57.0782	52.1827	47.3252	40.5747	36.8208		7.84143	92.1129	78.8366	65.7878	61.2529	57.2924	51.6151	45.0475	38.9769			8.46852	91.2961	1.06975	3	77.3294	2.29273	3	61.1569	2.70998	3	55.006	3.96944	3	51.251	3.61109	3	44.717	4.50846	3	37.2544
	8.53125	91.0546	79.5747	56.3426	47.3919	44.102	35.8126	26.6948	23.9386	90.2236	73.6989	62.1447	56.8431	52.2249	47.3936	40.3543	36.6623		7.90417	93.0588	79.5822	64.8151	60.9993	57.276	52.3508	44.624	39.2616			8.53125	90.9849	0.420821	3	77.1888	1.78378	3	61.2401	2.60602	3	54.7592	3.79765	3	51.1213	3.77453	3	44.8474	4.65856	3	36.9535
	8.59387	90.9614	80.3569	56.1402	47.038	44.5656	35.9288	26.9421	23.6448	90.1994	73.2727	61.3901	56.6603	52.6134	47.4107	40.9095	37.085		7.96678	91.9965	79.4346	65.5466	61.3755	57.1358	51.6066	44.6932	39.1637			8.59387	91.0185	0.490206	3	77.3463	2.11298	3	60.8381	2.56784	3	54.6021	3.9108	3	51.2981	3.56844	3	44.5367	4.3824	3	37.2095
	8.65662	90.6894	79.8599	56.035	47.3835	43.8874	35.4997	26.768	23.5785	89.7635	73.2645	62.1196	56.312	52.3685	47.1287	40.0767	36.9177		8.02953	92.6004	79.1861	66.0209	60.9421	57.5645	52.0886	44.1054	39.2972			8.65662	90.9329	0.75532	3	76.9216	1.93756	3	61.1265	2.69902	3	54.7429	3.87622	3	50.9849	3.7625	3	44.5731	4.67864	3	36.8422
	8.7193	91.2645	80.5687	56.9173	47.1644	43.4409	35.4908	26.5573	23.8059	90.7161	73.1661	61.8429	57.1043	52.4192	47.368	40.3462	36.3452		8.09222	91.5454	78.2619	65.1286	61.4001	56.9544	51.3952	44.0968	38.5765			8.7193	91.2869	0.33621	3	77.2261	2.16683	3	61.3901	2.46204	3	54.9203	3.9994	3	50.6853	3.78272	3	44.492	4.59732	3	36.9194
	8.78192	90.9614	78.7437	56.5045	46.7515	43.3637	35.3478	27.1436	23.6732	89.8523	74.0103	61.323	56.6603	51.8956	47.086	40.5911	37.0498		8.15483	91.6764	78.2231	64.8714	60.0916	56.5587	50.5581	44.4425	38.7011			8.78192	90.7912	0.500257	3	76.617	1.38732	3	60.9211	2.44216	3	54.5993	4.06861	3	50.5098	3.78965	3	44.4434	4.67893	3	37.0726
	8.84463	90.5495	79.1836	56.0916	47.5183	43.8788	35.3478	26.6123	23.4174	89.5132	72.658	61.65	56.2076	51.6508	46.9321	40.338	37.041		8.21755	92.9133	78.9531	65.1849	60.5414	56.9627	50.761	44.5462	38.8256			8.84463	90.6937	0.726757	3	76.5381	1.98235	3	60.8549	2.55173	3	54.704	3.78989	3	50.6219	3.63272	3	44.316	4.61197	3	36.9235
	8.90733	90.7204	80.3813	55.4116	47.1307	43.1147	35.2852	26.6215	23.3226	89.828	73.4694	61.4069	56.225	52.6049	47.1202	40.0359	36.5742		8.28025	92.2803	79.3336	65.3698	60.6395	57.243	51.3445	44.1314	38.5587			8.90733	91.0569	0.82397	3	77.2725	2.02527	3	60.5044	2.71747	3	54.3816	3.76859	3	50.677	3.92961	3	44.2845	4.60108	3	36.8288
	8.97022	91.1634	79.2244	56.2293	46.6419	43.501	34.5164	26.5665	23.0857	90.1187	71.9613	61.868	56.225	52.2925	46.7356	40.3543	36.4069		8.34313	92.1566	77.7493	65.7878	61.0484	57.0204	51.3614	44.1487	38.7989			8.97022	90.9255	0.414592	3	76.1693	2.17446	3	60.8583	2.434	3	54.3168	3.9958	3	50.479	3.62061	3	43.8239	4.76124	3	36.761
	9.03287	91.5598	79.0696	55.8731	47.2487	43.1147	34.7488	26.255	23.2657	89.9007	73.035	60.9877	56.6429	51.3974	46.8638	40.0767	36.4685		8.40578	91.9674	78.6657	65.8521	61.0975	56.7565	51.3783	44.0017	38.3719			9.03287	91.0796	0.592801	3	76.6335	1.83643	3	60.5667	2.59685	3	54.4484	3.69019	3	50.1041	3.71863	3	44.0315	4.75744	3	36.5646
	9.09578	91.0546	79.5992	55.7354	46.3217	42.6683	34.9544	26.4657	22.8961	89.0611	74.289	61.1973	56.3556	51.2032	47.1629	40.3053	36.5214		8.4687	92.8332	78.5648	65.1125	60.6068	56.9874	50.8879	44.0449	38.4875			9.09578	90.2894	0.620295	3	77.2099	1.55579	3	60.5505	2.61332	3	54.1145	4.01191	3	50.0252	3.95161	3	43.8728	4.50999	3	36.5469
	9.15847	91.2334	78.4504	55.9864	46.1448	42.8486	34.6773	26.2367	22.8487	89.8926	72.9366	60.8451	56.1727	51.6423	46.992	39.84	36.3276		8.53138	91.6764	78.2929	65.2331	60.0425	57.0369	51.336	43.8116	38.3986			9.15847	90.8638	0.490179	3	76.4047	1.74332	3	60.4846	2.49945	3	53.9183	3.99938	3	50.0778	3.80346	3	43.8418	4.65628	3	36.2952
	9.22115	90.3552	79.0777	54.6993	46.2712	42.7284	34.5164	26.1085	22.8393	90.482	73.453	61.1721	56.0596	51.617	46.9407	39.7665	36.7239		8.59407	91.8946	78.4094	64.9839	60.1079	56.7153	50.2706	43.777	38.5142			9.22115	90.6317	0.216238	3	76.7963	1.70831	3	60.0734	2.83926	3	53.999	4.00175	3	50.1035	3.89531	3	43.5541	4.56589	3	36.3231
	9.28418	90.9303	79.1022	55.1283	45.7993	42.9344	34.3197	25.8703	22.7919	90.6111	72.5186	61.1386	55.7461	51.9379	46.0776	39.7992	36.6358		8.6571	92.3458	77.6406	65.2251	60.5332	56.6988	51.0908	43.6819	38.2473			9.28418	91.4922	0.727324	3	76.5706	2.0469	3	59.7739	2.38772	3	53.8545	4.21215	3	50.0208	3.66545	3	43.3586	4.63749	3	36.1364
	9.34687	90.4951	79.4444	54.7397	46.6672	42.4107	34.3376	25.4306	22.7161	89.5859	72.3055	61.0296	55.6591	52.1658	46.8296	39.6522	36.2043		8.71978	91.8801	77.9435	65.41	60.4923	56.1959	50.6173	43.8548	38.4342			9.34687	90.5906	0.609554	3	76.5515	2.16901	3	60.0957	2.86101	3	53.9076	3.77753	3	49.9772	3.89363	3	43.697	4.76422	3	35.817
	9.40968	91.1401	78.6378	54.0031	46.8948	42.3249	34.4806	25.5771	22.4128	88.4314	72.4121	60.9793	55.5372	51.3637	46.6501	39.693	36.9		8.7826	91.56	77.0969	64.9357	60.386	56.2701	50.8963	43.4831	38.5854			9.40968	90.5542	1.09632	3	75.9816	1.85431	3	59.6297	2.9375	3	53.8665	3.63998	3	49.7499	3.90523	3	43.5609	4.61675	3	36.1128
	9.4725	90.2852	78.9148	54.9745	46.3386	42.0931	34.0694	25.9802	22.754	89.0369	72.535	60.7026	56.1466	51.2792	45.864	39.742	35.9401		8.84542	92.0183	77.7726	64.8232	60.386	56.3361	50.668	43.8202	38.4786			9.4725	90.3183	0.749531	3	76.4126	1.9659	3	60.0864	2.79051	3	53.7861	3.80602	3	49.6884	4.00572	3	43.2406	4.72352	3	36.2318
	9.53523	91.1246	78.76	54.7397	46.4481	42.2304	34.0515	25.4672	22.5171	89.0773	72.4613	60.5014	55.7374	51.313	46.7271	39.8645	35.9401		8.90815	92.6222	77.9668	64.6945	59.789	56.3113	50.4482	43.8289	38.105			9.53523	90.5727	0.756229	3	76.3986	1.98168	3	59.6972	2.6606	3	53.8198	3.82459	3	49.5064	3.7885	3	43.404	4.74107	3	36.0815
	9.59785	90.5106	78.4748	54.5131	46.0437	42.4451	33.6581	25.4855	22.3749	88.9965	73.3301	61.3901	55.9638	50.7388	46.2143	39.3093	35.6671		8.97077	91.4945	77.3221	64.4775	60.0834	55.6435	50.2199	43.3621	37.7224			9.59785	90.1132	0.565991	3	76.4352	1.57784	3	60.143	2.9569	3	53.6977	3.93171	3	49.5432	3.80026	3	43.0935	4.80693	3	35.9112
	9.66052	91.0546	79.2081	54.4645	45.024	42.5481	33.8012	25.4122	22.4128	88.9562	71.2073	60.8871	56.3469	51.2623	45.77	39.2767	35.8256		9.03343	91.7782	77.7959	64.8392	59.4537	55.8001	50.482	43.3621	37.7224			9.66052	90.4023	0.724233	3	76.029	2.45132	3	59.8573	2.86293	3	53.3928	4.24428	3	49.7713	3.81345	3	42.9001	4.65163	3	35.6713
	9.72323	90.7049	78.4911	54.764	45.5212	42.0759	33.8459	25.5038	22.4602	88.8431	71.9121	60.9961	55.9638	51.1779	47.1543	39.4073	35.7552		9.09615	90.7523	77.7415	64.7186	59.6663	56.2041	49.5011	42.8695	37.9448			9.72323	90.0807	0.618798	3	75.6522	1.9519	3	59.9908	2.77339	3	53.3736	4.00128	3	49.3796	3.80542	3	43.3539	4.78576	3	35.826
	9.78585	90.5184	78.5807	54.0193	45.0324	42.1875	33.5598	24.8809	22.754	89.5455	72.8301	60.8703	55.7374	50.3842	45.9494	39.2848	36.1691		9.15877	91.4654	77.827	64.6222	59.4374	55.7424	49.8562	42.809	37.8381			9.78585	90.6674	0.694751	3	76.4178	1.80645	3	59.706	3.00404	3	53.3097	4.2549	3	49.1907	3.7466	3	42.8738	4.74564	3	35.5257
	9.84857	91.6298	77.8393	54.5293	45.2263	41.2775	34.3465	25.0733	22.2612	89.1741	71.6335	60.8703	55.929	51.0597	45.7272	39.4971	35.5438		9.22148	91.0579	77.858	64.3489	59.6663	55.965	49.2051	43.0942	37.2865			9.84857	90.7516	0.790406	3	75.298	1.87745	3	59.5785	2.62305	3	53.1465	4.01806	3	48.9009	3.92937	3	42.9069	4.36242	3	35.4733
	9.91142	90.8681	77.7416	54.4726	45.5633	41.7067	33.2022	25.1832	22.356	89.5213	72.7973	60.6691	55.1889	51.0935	46.1716	39.1542	35.7288		9.28433	92.9351	78.091	63.0547	60.018	55.19	49.6787	42.7398	37.758			9.91142	90.3272	0.410764	3	75.4722	1.44161	3	59.6105	2.71289	3	52.974	3.80394	3	49.3768	4.02533	3	43.04	5.02599	3	35.4187
	9.97408	90.2541	78.3037	53.8736	44.6532	41.681	33.2201	25.1099	21.7779	89.3033	72.6416	60.8787	56.1118	51.237	46.3767	39.1869	35.3148		9.347	91.6909	77.9046	64.5177	59.3965	55.3549	49.9239	42.3682	37.5445			9.97408	90.096	0.419518	3	75.9804	1.71157	3	59.3627	2.83479	3	52.9565	4.19127	3	49.1357	3.8438	3	42.8071	4.84533	3	35.4859
	10.0368	89.9821	79.6969	53.7359	45.0072	42.0158	32.7195	24.8168	22.1759	89.4405	72.9366	60.3421	55.7374	50.3926	46.4707	39.0889	35.5438		9.40967	92.0911	76.895	63.9068	59.1675	55.5611	49.5518	43.0683	36.9484			10.0367	90.0365	0.360805	3	76.4448	1.95572	3	59.2077	2.88789	3	53.0478	4.09306	3	49.1088	3.77945	3	42.6265	4.99475	3	35.1279
	10.0996	91.2567	78.0267	54.335	44.9397	41.432	33.9174	24.8901	22.0243	89.271	72.4777	60.9038	55.7287	50.0887	46.0263	38.8848	35.7023		9.47252	91.6327	77.7881	64.582	58.8731	55.693	49.7886	42.9732	37.3043			10.0996	90.6086	0.66889	3	75.8904	1.72433	3	59.4847	2.65995	3	53.1778	4.21734	3	48.8486	3.97268	3	42.7988	4.49557	3	35.2312
	10.1623	91.1634	78.1	53.8816	44.7881	41.0199	33.5956	24.6427	22.2043	88.3184	72.24	60.0402	54.9626	51.0766	46.0861	39.1297	35.491		9.53517	91.5163	77.9745	63.8505	59.2738	54.9757	49.4335	42.9127	37.2242			10.1623	90.3521	1.02376	3	75.7942	1.80314	3	59.0619	2.75218	3	52.8964	4.21349	3	48.9828	4.12793	3	42.5874	4.53263	3	35.2189
	10.2251	90.5339	78.0593	54.1488	44.569	41.0199	32.943	24.7801	22.1759	88.3023	71.0434	60.602	55.3195	50.7051	45.881	38.9338	35.1651		9.59802	90.8324	77.5008	64.5257	59.0857	55.4456	49.4081	42.9386	37.0107			10.2251	90.1514	0.976137	3	75.5837	2.27325	3	59.3864	2.74124	3	52.8333	4.24002	3	48.6446	3.94426	3	42.4002	4.78315	3	35.0755
	10.288	89.679	78.5644	53.4202	44.4257	41.183	33.0592	24.3038	21.8158	88.7705	71.8712	60.9038	55.3021	50.646	45.5392	39.0562	35.306		9.66088	91.1962	77.6716	64.2203	58.8077	55.5033	49.129	42.325	37.242			10.288	90.0517	0.867501	3	75.9011	2.04946	3	59.0083	2.84181	3	52.7498	4.26451	3	48.7068	3.90629	3	42.4659	4.79658	3	35.1016
	10.3509	90.293	78.7844	54.1002	44.4763	40.6851	32.782	24.7343	21.6831	88.8754	72.3219	59.6546	55.4936	50.8824	45.2401	38.5664	35.3677		9.72382	90.6941	76.5533	64.2122	58.6359	54.885	49.0614	42.567	37.2954			10.3509	90.1288	0.681204	3	75.8166	1.88407	3	58.8856	2.56976	3	52.7078	4.18676	3	48.4547	3.97486	3	42.1357	4.76412	3	34.9666
	10.4136	91.7386	78.2304	53.404	44.3583	40.874	32.6211	24.5786	21.5599	89.0692	71.7728	60.5182	55.067	50.2153	45.7785	38.4848	35.3413		9.78648	91.9383	77.8425	64.2283	59.1593	55.0004	49.1121	42.4114	36.9395			10.4136	90.4764	0.773983	3	75.581	1.9521	3	59.1343	2.99005	3	52.6435	4.25981	3	48.5179	4.014	3	42.3771	4.95191	3	34.7319
	10.4764	90.0288	77.823	53.0155	44.5943	40.4447	32.5139	24.3954	21.8916	88.6413	71.6826	60.4175	55.1454	49.886	45.1632	38.5338	35.1387		9.84935	91.4508	76.4212	63.336	58.2843	54.3656	48.647	41.8496	36.7171			10.4764	90.1131	0.875058	3	75.5031	1.92483	3	58.8078	2.98988	3	52.7809	4.2133	3	48.1442	4.0375	3	42.0489	4.86209	3	34.9522
	10.5392	90.2619	77.9453	54.1083	44.0718	40.8225	32.5407	24.6152	21.3704	89.0934	72.4039	59.6965	55.9377	50.342	45.77	38.5501	34.8833		9.91212	90.5923	75.8776	63.6897	58.1698	55.3302	49.7463	41.9188	37.0996			10.5392	90.1838	0.608269	3	75.862	1.74108	3	59.1005	2.72655	3	52.7564	4.39373	3	48.5182	4.02144	3	42.2262	4.9005	3	34.7803
	10.6018	90.3474	77.9615	52.1898	44.2993	40.522	32.2993	24.6244	21.3704	89.1096	71.7236	60.1157	55.5111	50.3504	45.6076	38.7623	35.2268		9.97468	90.7305	76.996	63.336	58.1044	54.4892	48.8246	42.1608	36.7794			10.6018	90.2492	0.631568	3	75.4516	1.90094	3	58.5204	3.29253	3	52.6192	4.22385	3	48.3769	4.08629	3	42.148	4.99644	3	34.952
	10.6646	91.1868	77.0409	53.2826	43.7179	40.8053	32.5854	24.432	21.5504	88.6978	71.9941	60.1912	54.771	51.161	45.4452	38.6072	34.9538		10.0375	90.6868	76.7008	63.545	58.3988	54.918	48.6893	41.478	36.3879			10.6646	90.2826	0.795026	3	75.1029	1.5701	3	58.8026	2.87134	3	52.2714	4.39809	3	48.6151	3.98298	3	42.1131	4.83507	3	34.8708
	10.7273	90.4484	76.9594	52.2788	44.0718	40.7624	31.9775	24.3862	21.1713	89.0288	72.0351	59.9899	55.0061	50.0718	45.3854	37.8806	34.7776		10.1002	91.298	77.1668	63.2154	58.8649	55.0251	48.4526	41.9188	36.379			10.7273	90.4136	0.789678	3	75.1541	1.56596	3	58.492	3.2425	3	52.4622	4.30219	3	48.18	3.85436	3	41.6763	4.89393	3	34.7429
	10.7899	90.2852	77.6601	53.0964	43.1027	40.0584	32.0043	24.1938	21.1619	89.2064	71.7154	59.9899	54.9887	50.494	45.3256	37.8562	34.5839		10.1628	91.5745	77.0426	63.2637	58.9385	54.852	48.0805	41.8842	36.3256			10.7899	90.4742	0.792178	3	75.4623	1.88279	3	58.6815	2.92106	3	52.1825	4.6489	3	48.2125	4.20682	3	41.7274	4.91594	3	34.3595
	10.8527	91.0469	77.1061	52.724	43.937	40.0412	31.8523	23.9557	21.3514	87.1397	71.0024	60.5098	55.1367	50.2491	45.4965	38.697	34.4606		10.2256	91.6182	77.6483	63.4084	58.6114	54.2089	48.3765	41.5125	36.2544			10.8527	89.8743	1.37189	3	75.0115	2.00524	3	58.7253	3.0817	3	52.499	4.38488	3	48.084	4.16173	3	41.8605	5.06605	3	34.6584
	10.9156	90.2775	77.1957	52.4893	43.583	39.4746	32.1116	23.7816	21.5978	88.9804	72.2072	59.4617	54.7971	50.4686	44.7359	38.4603	35.306		10.2886	91.7055	77.2678	62.701	58.5214	54.2914	48.7993	41.9447	36.5658			10.9156	89.8579	0.438883	3	75.1789	1.51715	3	58.2548	3.04083	3	51.9434	4.24977	3	47.7567	4.22243	3	41.5637	4.81049	3	34.4148
	10.9783	90.8448	77.9453	52.1574	43.2881	39.921	32.0579	23.9923	21.2377	89.1418	71.7646	59.8558	54.4402	50.2153	45.3769	38.6481	34.7424		10.3512	91.218	76.3436	62.9019	58.1534	53.7967	48.3849	41.599	36.3879			10.9783	90.3167	0.588404	3	75.4909	1.89417	3	58.5247	3.35857	3	51.9497	4.4592	3	47.7798	4.02294	3	41.7877	4.92032	3	34.6888
	11.0414	90.2231	76.8291	52.4407	43.0606	39.9382	31.9596	23.6442	21.2377	89.271	71.4286	60.0738	54.7536	50.4011	44.9581	38.3868	34.4694		10.4143	90.6214	76.7397	63.4807	58.5051	54.4645	48.7316	41.1322	35.9164			11.0414	89.9487	0.340907	3	74.7583	1.6813	3	58.4909	3.1376	3	51.8856	4.50172	3	47.9464	4.1028	3	41.6633	4.9344	3	34.4511
	11.1039	90.4251	76.8372	52.3193	42.555	39.3887	31.7182	23.6717	21.0766	89.0207	71.2237	59.4785	54.5098	50.0633	45.1889	38.2888	34.8657		10.4768	91.6691	77.0037	62.9904	58.6032	54.1017	48.4695	41.9274	36.3256			11.1039	89.9618	0.470532	3	74.3174	1.6457	3	58.2788	3.15201	3	51.6495	4.65036	3	47.527	4.16423	3	41.5188	4.95148	3	34.2778
	11.1665	90.666	77.9371	51.7769	42.6393	40.024	31.3696	23.8457	20.9818	88.4072	71.8876	60.166	54.179	49.8269	44.1121	38.0194	34.7864		10.5394	91.1962	77.2367	63.4968	58.2597	54.3903	48.368	41.1755	36.6014			11.1665	90.1335	0.883972	3	75.3299	1.79558	3	58.4504	3.46555	3	51.5891	4.60535	3	47.7176	3.97546	3	41.1564	5.01966	3	34.2662
	11.2292	90.4407	75.9655	51.704	42.9932	39.5862	31.4858	23.5892	21.2187	88.9319	71.9367	59.8642	54.3357	49.8945	44.3172	38.1256	34.1964		10.6021	91.2907	76.6698	63.2556	58.0471	54.2584	48.5371	41.4693	36.0231			11.2292	90.825	1.21916	3	74.7175	1.39283	3	58.3818	3.5067	3	51.8247	4.55065	3	47.7784	4.2526	3	41.1282	4.91244	3	34.1239
	11.2919	90.5262	77.3831	52.1655	43.5409	39.5948	31.602	23.4976	20.688	87.9067	72.2728	59.8306	54.9103	49.7425	44.565	37.7663	34.6015		10.6648	90.9633	76.2737	62.9341	58.3252	53.8791	48.3088	41.573	35.9164			11.2919	89.7502	0.925604	3	75.2684	1.53959	3	58.4762	3.32226	3	52.0216	4.31158	3	47.5959	4.14127	3	41.3933	4.9958	3	33.9938
	11.3545	90.0443	76.1854	51.2507	42.8752	38.9852	31.2176	23.2778	21.3609	88.6252	71.404	59.8223	54.1442	50.3757	44.8641	38.0113	34.3197		10.7275	91.7637	76.4678	63.2074	58.3088	53.706	47.6662	41.962	36.1299			11.3545	89.669	0.52875	3	74.4761	1.5393	3	57.8898	3.41478	3	51.5444	4.44878	3	47.3867	4.25858	3	41.2634	5.08957	3	34.103
	11.4172	90.3552	76.9268	51.7769	42.4707	39.5776	31.4411	23.406	20.8776	89.3114	71.9285	59.4282	54.6491	49.734	44.8983	38.2643	34.2404		10.7901	91.931	77.0115	62.9582	58.456	54.0853	47.8522	41.0285	36.0231			11.4172	90.273	0.533074	3	75.1699	1.62258	3	57.9178	3.19981	3	51.6705	4.69418	3	47.5241	4.10162	3	41.2281	4.9442	3	34.1494
	11.4799	90.5883	75.9736	50.9431	42.8331	39.1569	31.1997	23.7175	20.7638	88.94	71.2647	59.3276	53.9701	49.3372	44.7787	38.346	34.6191		10.8528	91.4363	76.9261	62.9421	58.4233	53.9616	48.2327	41.3224	35.3737			11.4799	90.176	0.629307	3	74.3512	1.54397	3	57.4161	3.32566	3	51.4177	4.40833	3	47.3203	4.25223	3	41.1669	5.04616	3	34.1796
	11.5427	90.3707	76.3484	51.3964	42.6561	39.3544	30.5561	23.3327	20.5838	88.3023	71.7728	59.5288	54.327	49.4554	44.3856	37.6031	34.8569		10.9156	90.3158	76.1339	62.8135	57.4501	53.3267	47.8437	41.0026	35.4181			11.5427	90.1043	0.972686	3	74.8138	1.52053	3	57.6423	3.20347	3	51.5023	4.51832	3	47.4503	4.21627	3	40.8242	5.21373	3	33.9766
	11.6054	90.122	75.5011	51.0888	43.305	39.0196	31.2623	23.5526	20.7544	88.7382	70.8958	59.336	54.4924	49.6834	44.753	37.7908	34.2492		10.9783	90.9633	76.763	63.5611	58.1207	53.2031	47.9283	41.4261	36.1744			11.6054	90.2929	0.950742	3	74.0604	1.58441	3	57.6496	3.40707	3	51.6483	4.2415	3	47.2718	4.24318	3	41.2356	5.0583	3	34.052
	11.6682	89.7334	77.2283	51.9469	42.3359	38.8393	31.003	23.1861	20.5648	89.0773	71.404	58.5311	54.3792	49.9704	44.2318	37.2275	34.2404		11.0411	90.3522	76.0174	62.9582	57.8427	53.4999	48.072	41.3224	35.774			11.6682	90.0532	0.674991	3	74.9945	1.81304	3	57.4744	2.93425	3	51.5165	4.69744	3	47.3981	4.3914	3	40.8599	5.00968	3	33.5288
	11.7308	90.1065	76.4217	51.7445	42.7404	39.011	31.0924	23.4885	20.5838	88.5121	71.3548	59.3276	54.3183	49.9367	44.6505	38.0766	34.17		11.1037	90.4395	74.8913	63.0386	57.8835	53.1289	47.6492	40.8729	35.3915			11.7308	89.5914	0.539832	3	74.3365	1.52983	3	57.8199	3.16349	3	51.5874	4.5302	3	47.2352	4.19196	3	41.0123	5.01832	3	34.1229
	11.7934	90.635	76.5032	51.3317	42.1842	38.7277	30.8153	23.5343	20.8586	87.6564	70.7237	59.7133	54.031	50.114	44.5565	37.5949	34.1964		11.1663	91.3271	76.165	63.4084	57.949	53.302	47.9875	40.9334	35.6406			11.7934	89.9577	1.18267	3	74.4691	1.87502	3	57.7465	3.28642	3	51.1918	4.60518	3	47.3647	4.41255	3	40.9929	5.16444	3	33.8106
	11.8561	89.9044	76.8698	51.1779	42.3949	38.5302	31.1461	23.0396	20.3469	88.1408	71.5433	58.9838	53.8395	50.5868	44.8214	37.6847	34.1259		11.2291	93.1024	76.2504	63.5772	58.1452	53.8544	47.5816	40.6569	35.6584			11.8561	89.6065	0.774649	3	74.9034	1.68814	3	57.5512	3.34373	3	51.1246	4.46758	3	47.4373	4.51672	3	41.0026	4.96973	3	33.6209
	11.9188	90.4562	76.9105	51.0645	41.9314	38.7191	31.1997	23.3785	20.4606	88.0278	70.7155	59.0928	54.8494	50.19	44.4112	37.5867	33.9586		11.2917	90.8178	76.1494	63.4325	57.6137	53.4504	48.0129	40.7174	35.2936			11.9188	89.5635	0.771257	3	74.2087	1.83159	3	57.4051	3.28379	3	51.3558	4.76442	3	47.4339	4.45442	3	40.9091	4.91713	3	33.9634
	11.9816	90.4173	76.2913	50.7488	42.2011	38.4615	31.012	23.0671	20.2521	87.0913	70.9696	59.6797	53.4216	49.8607	44.2318	37.7174	34.3373		11.3545	90.3376	75.8388	62.5965	57.6137	52.7991	47.7084	41.0199	35.5872			11.9816	89.3573	1.13376	3	74.276	1.66636	3	57.6777	3.56583	3	51.0133	4.55463	3	47.0487	4.37795	3	40.8459	4.99582	3	33.5804
	12.0442	89.8345	76.6091	51.1374	42.3275	38.1868	30.4488	22.7556	20.4132	89.053	70.6827	58.967	53.7698	49.3034	44.3856	37.3826	34.1524		11.4171	91.1525	76.6542	62.5482	57.8917	53.2608	47.3448	40.7779	35.774			12.0442	89.7902	0.413421	3	74.2707	1.82132	3	57.4089	3.26535	3	51.0789	4.48252	3	46.7384	4.38837	3	40.6362	5.1525	3	33.5062
	12.107	90.6039	76.1121	51.1212	41.8134	38.1095	30.2342	22.7006	20.3469	88.1408	71.2565	59.0677	53.4738	49.5229	44.2659	37.4643	33.7649		11.4799	90.9997	75.8155	61.9775	57.4501	53.4669	47.5224	40.4754	35.4982			12.107	89.9657	0.926108	3	74.4853	1.61443	3	57.5442	3.35612	3	51.1033	4.82696	3	46.7555	4.41531	3	40.4882	5.18581	3	33.4171
	12.1697	89.407	76.4624	50.935	42.4286	37.9979	29.9035	23.0579	20.4037	88.0116	72.0679	59.336	53.4738	48.8305	44.753	37.2112	33.9058		11.5426	91.64	76.3203	62.0016	57.5237	53.5411	47.5309	40.9939	35.8185			12.1697	89.4073	0.805874	3	74.7534	1.35934	3	57.3813	3.30532	3	51.1475	4.51472	3	46.3584	4.29497	3	40.6671	5.43358	3	33.5988
	12.2323	90.3163	76.1854	50.7974	42.2011	37.852	30.2879	22.6365	20.3753	87.9955	71.1827	59.0341	54.4228	48.9403	44.3428	37.3337	34.3549		11.6052	92.0183	75.7844	62.5241	57.1475	53.1124	47.6915	40.8124	35.4982			12.2323	89.4867	0.747203	3	74.2677	1.55764	3	57.0499	3.19506	3	51.2026	4.56109	3	46.6129	4.538	3	40.6219	5.23402	3	33.3032
	12.295	89.85	76.4624	50.7083	42.2769	38.3585	30.4935	22.6915	20.2331	88.4718	71.1745	59.0928	53.7959	49.2696	43.907	37.0398	34.0995		11.668	91.349	76.3514	61.9453	57.8345	53.3845	47.3448	40.1729	35.1335			12.295	89.6598	0.638155	3	74.0156	1.53917	3	57.2354	3.36301	3	51.0762	4.50528	3	46.8118	4.34828	3	40.5029	5.08929	3	33.4137
	12.3577	90.293	76.5928	50.8783	41.0719	38.0666	30.0912	22.4716	20.0057	89.3517	70.7647	59.3611	53.5696	49.2443	43.8728	37.252	33.8353		11.7306	90.1557	75.233	62.3875	57.7036	52.7579	47.2941	40.8038	35.5605			12.3577	90.0305	0.342266	3	74.5618	1.90012	3	57.3655	3.32261	3	50.49	4.80212	3	46.5797	4.35461	3	40.4335	5.26691	3	33.2499
	12.4203	89.3915	75.5988	49.834	41.6955	37.7747	29.8677	22.6823	20.3563	88.0762	70.945	58.4975	53.7002	49.0079	44.0523	37.1377	33.5887		11.7932	91.5818	76.1805	62.1945	57.3602	53.2525	47.607	40.3025	34.9911			12.4203	89.2126	0.611077	3	73.8065	1.44591	3	56.8367	3.659	3	50.6923	4.58002	3	46.4118	4.43156	3	40.385	5.33829	3	33.3194
	12.483	89.7023	76.1528	50.3764	41.0972	37.397	30.3236	22.4716	19.8256	87.8098	70.6172	58.6484	54.1268	48.915	44.3514	37.5949	34.0643		11.8559	90.7742	76.297	62.492	57.1394	53.1948	47.0404	40.1383	35.4448			12.483	89.3681	0.820425	3	74.1356	1.76552	3	56.9633	3.42181	3	50.7496	4.89819	3	46.2412	4.53584	3	40.2815	5.00652	3	33.4131
	12.5457	90.2308	75.5418	50.595	41.3078	37.3025	30.2968	22.5907	20.0531	88.722	71.3548	59.4114	53.7611	48.9487	44.1719	37.2602	33.6328		11.9186	90.2066	75	62.0579	57.2866	53.3927	47.1165	40.9248	35.5516			12.5457	89.6107	0.455769	3	74.2865	1.4709	3	57.0118	3.24219	3	50.8288	4.87608	3	46.1852	4.54576	3	40.3508	5.07501	3	33.0675
	12.6083	89.8733	76.1365	50.4655	40.8612	37.3369	30.1716	22.4716	20.1952	88.3749	70.4942	59.2186	53.8046	48.7883	44.0438	37.6929	33.6592		11.9812	90.5632	75.5669	62.6045	57.4174	52.8238	47.2941	39.9568	35.3648			12.6083	89.4922	0.567989	3	74.0452	1.78483	3	56.9847	3.31299	3	50.43	4.85313	3	46.4455	4.7299	3	40.1734	5.04328	3	33.2009
	12.671	90.9147	76.3565	50.1902	42.0747	37.5429	30.3326	22.7739	19.9393	88.4637	71.1663	59.1012	54.1006	49.1598	43.4114	36.95	33.5711		12.0439	90.4831	75.5203	62.1222	57.1394	52.7249	47.0742	40.3803	34.7509			12.671	89.8399	0.72341	3	74.3348	1.60425	3	56.9235	3.4359	3	51.173	4.64452	3	46.3907	4.52586	3	40.036	4.926	3	33.1376
	12.7339	89.5858	76.3647	49.6074	41.0972	37.7576	30.118	22.7006	20.1194	89.1499	71.2237	59.1515	53.7089	49.1092	43.7105	36.5907	33.8353		12.1068	91.1525	76.0873	62.4437	58.0226	52.6342	46.9643	40.0864	35.0445			12.7339	89.8439	0.492392	3	74.411	1.60716	3	56.7781	3.65303	3	50.8066	4.98385	3	46.2832	4.34279	3	40.0698	5.03525	3	32.8407
	12.7965	90.5883	76.3076	49.9474	40.9876	38.058	29.7872	22.38	20.0341	88.3184	71.4286	58.8245	53.7524	48.9825	44.0438	37.2112	33.8353		12.1695	90.8033	75.73	61.873	57.5401	52.2467	47.3448	40.5272	34.8399			12.7965	89.8888	0.786743	3	74.248	1.4588	3	56.7825	3.50861	3	50.5447	4.86383	3	46.5967	4.40566	3	40.1242	5.21852	3	33.0732
	12.8593	88.5521	75.0367	50.4493	40.6927	36.8304	29.528	22.38	20.0057	88.1489	71.0925	58.6317	52.8469	48.6701	43.8558	36.8928	33.6944		12.2322	90.1484	75.4349	61.3183	56.984	53.0464	47.2349	39.9395	34.5107			12.8593	89.3379	0.994198	3	73.9142	1.42065	3	56.7006	3.20086	3	50.1664	4.88334	3	46.0064	4.72063	3	39.9441	5.26156	3	33.0045
	12.9219	90.4407	75.4603	49.6236	41.5354	37.5429	28.9469	22.3067	20.0057	88.1569	71.6335	58.967	53.1865	49.2274	43.9754	36.9173	33.5183		12.2948	90.6577	74.4098	61.9051	57.1557	52.8073	47.1081	40.5099	34.8843			12.9219	89.9701	0.940851	3	73.9303	1.16936	3	56.7623	3.65525	3	50.4432	4.56212	3	46.1961	4.39074	3	39.7705	5.4565	3	33.0026
	12.9848	91.078	76.381	50.1012	40.7854	37.5172	29.3045	22.1601	19.9299	87.6726	70.2647	58.8832	53.23	48.3999	43.8814	36.6479	33.5887		12.3577	90.4467	76.3281	61.8569	56.8286	52.4281	47.3364	40.0259	34.9466			12.9848	89.8658	1.09865	3	73.8379	1.83919	3	56.9578	3.53642	3	50.1041	4.74276	3	46.0656	4.41851	3	39.8443	5.31776	3	32.8726
	13.0475	90.0288	75.2485	49.6964	40.6337	37.3111	29.8588	22.0777	19.655	88.1085	69.9369	58.8916	53.0124	48.6785	43.4797	37.0071	33.2365		12.4204	90.1703	74.8757	62.1785	56.6814	52.4528	47.2349	40.1383	35.1512			13.0475	89.4552	0.675833	3	73.4909	1.77705	3	56.6756	3.56624	3	50.1582	4.88802	3	46.153	4.55435	3	39.7261	4.98047	3	32.8208
	13.1101	90.7282	76.0062	49.9231	40.9371	37.1823	29.1615	22.1876	19.655	87.0267	71.699	58.9587	53.6915	48.0875	43.7361	37.1051	33.2277		12.483	90.5923	75.6368	61.865	57.0249	52.4116	46.1695	40.1729	34.3683			13.1101	89.4345	1.20501	3	74.5975	1.44942	3	56.862	3.55882	3	50.3003	4.74056	3	45.8004	4.46433	3	39.6101	5.26266	3	32.8872
	13.1729	89.1117	75.1833	49.4374	40.5157	37.0192	29.4118	22.4441	19.655	88.5283	71.6499	58.3718	52.7512	48.839	43.5481	37.3092	33.3509		12.5458	89.8792	75.963	61.0289	57.4174	52.3044	46.5838	39.3518	34.7598			13.1729	89.3259	0.533166	3	73.8486	1.10774	3	56.3785	3.57383	3	49.7701	4.72381	3	45.8976	4.5226	3	39.6675	5.17818	3	33.0005
	13.2356	90.5262	75.6559	49.1864	40.7011	37.4828	28.8217	22.325	19.5697	86.9702	70.863	59.0844	53.0298	48.4083	43.2832	35.9458	33.6416		12.6086	90.2285	75.5048	61.2701	56.6241	53.2113	46.3048	39.4382	34.3683			13.2356	89.1106	1.08862	3	73.8578	1.50739	3	56.4627	3.68518	3	49.9902	4.7361	3	46.307	4.6094	3	39.2839	5.27918	3	32.5783
	13.2983	91.824	76.0877	49.1945	41.173	36.8218	29.2687	22.0685	19.5697	87.7937	70.3631	58.4305	53.0472	48.4083	42.9414	36.7948	33.0427		12.6712	90.1412	75.4815	61.4791	57.3438	52.4693	46.3639	39.6889	34.9021			13.2983	90.4217	1.31499	3	73.8532	1.76777	3	56.1992	3.57841	3	50.306	4.68651	3	45.9795	4.74414	3	39.4007	5.14193	3	32.5655
	13.3611	89.5702	75.3626	49.065	40.7011	36.8132	29.3224	21.7387	19.4939	87.1155	71.7892	58.9922	52.9427	48.3239	43.4797	37.0969	33.5359		12.734	90.796	75.6446	61.5756	57.6137	51.9829	46.3809	39.2308	34.4662			13.3611	88.9423	0.928139	3	74.2266	1.21965	3	56.4103	3.72623	3	49.8004	4.62161	3	45.7589	4.60646	3	39.4683	5.10988	3	32.5995
	13.4238	89.8966	75.0041	49.4941	40.9455	36.2895	28.9201	21.812	19.3328	88.496	70.1418	58.9084	53.2561	48.9234	42.7277	36.754	33.1924		12.7967	90.7596	75.0078	61.5756	56.894	52.7496	46.5415	39.6283	34.4751			13.4238	89.7053	0.650022	3	73.5192	1.69278	3	56.5763	3.60925	3	50.3025	4.78333	3	45.6742	4.76576	3	39.171	5.20484	3	32.4866
	13.4866	90.4018	75.2566	49.745	40.2039	36.4955	29.3224	22.0044	19.674	87.2366	70.8303	58.1118	52.7686	48.535	42.9927	36.3458	33.7384		12.8595	91.3126	75.6135	61.0209	56.9594	52.5188	46.4485	39.7407	34.3772			13.4866	89.403	1.08426	3	73.6257	1.40421	3	56.3676	3.43268	3	49.6175	4.79171	3	45.5749	4.63041	3	39.4779	5.15734	3	32.5097
	13.5495	89.85	74.833	48.7574	40.0944	36.796	28.938	21.8761	19.3328	88.5283	71.2728	59.2353	53.0298	48.5603	43.0525	36.0683	33.6944		12.9224	91.3126	74.6971	61.6961	56.6078	51.818	46.3893	39.7839	34.7153			13.5495	89.686	0.626411	3	73.6243	1.17587	3	56.563	3.96691	3	49.7335	4.89912	3	45.7687	4.59182	3	39.2457	5.21222	3	32.3111
	13.6121	88.7309	76.0877	48.7088	40.3135	36.444	29.1615	21.8853	19.5887	87.6241	70.2483	58.2292	52.638	48.5434	42.779	36.354	33.2541		12.9851	90.8469	74.868	61.8891	56.297	52.2797	46.347	39.8099	34.2883			13.6121	88.963	0.848006	3	73.8408	1.81497	3	56.1444	3.83548	3	49.635	4.75803	3	45.742	4.76977	3	39.3474	5.18253	3	32.4382
	13.6748	89.0961	75.0693	49.1541	40.2629	36.547	28.7413	21.6746	19.6077	87.7129	70.0189	58.7658	53.1604	48.2817	43.0354	35.9866	33.3598		13.0477	90.2285	75.2874	61.4389	56.8286	52.4693	45.8397	39.3777	34.3416			13.6748	89.4078	1.07984	3	73.3575	1.66952	3	56.5467	3.79345	3	49.994	4.96346	3	45.4884	4.57439	3	39.1491	5.2592	3	32.2051
	13.7376	90.3008	75.0693	48.4741	40.3219	36.4698	28.6787	21.812	19.2096	87.7694	69.7976	58.5311	53.1865	48.7883	42.6936	36.2805	33.0427		13.1105	90.5486	76.0873	61.7042	56.2725	52.1313	45.9327	39.3691	34.2794			13.7376	89.2947	0.775457	3	73.043	1.63936	3	55.9819	3.81781	3	49.9706	4.9129	3	45.6975	4.69692	3	38.9664	5.20844	3	32.1184
	13.8005	89.7412	74.9552	48.7574	40.2124	36.0749	29.4565	21.638	19.2191	88.0036	71.5269	58.2125	52.5683	48.9234	43.1379	36.1825	33.3862		13.1734	90.3376	74.7126	61.3264	56.0435	51.8344	46.0426	39.2481	34.6619			13.8005	89.3341	0.681773	3	73.905	1.19176	3	55.9433	3.67336	3	49.589	4.79102	3	45.5504	4.80287	3	39.4498	5.05348	3	32.313
	13.8631	89.0495	74.3441	49.0164	39.7405	36.0834	29.1078	21.7387	19.4939	87.5838	70.0598	58.246	53.2126	48.3323	43.3516	36.3948	33.5535		13.236	89.8356	75.0544	61.1174	56.2398	53.0299	45.7467	39.4641	34.0125			13.8631	88.7744	0.623394	3	73.1036	1.53052	3	56.1775	3.68543	3	49.3684	4.84642	3	45.37	4.74363	3	39.3315	5.15059	3	32.4836
	13.9258	89.2127	74.8656	49.1055	39.732	36.0148	28.9022	21.354	19.7024	87.5272	70.8712	58.1286	52.8557	47.9946	42.9157	36.4111	33.2188		13.2987	91.6473	75.1087	60.9727	56.6977	52.7084	45.9919	38.8332	33.8167			13.9258	89.0162	0.80887	3	73.2528	1.21543	3	56.1547	3.63652	3	49.462	4.93856	3	45.2373	4.73387	3	39.0895	5.14597	3	32.2859
	13.9885	88.9873	74.5641	48.3526	39.6815	36.3238	29.3849	21.6013	19.1528	88.2942	70.486	57.7346	52.2636	48.1297	42.8816	36.3132	32.8578		13.3614	90.1412	75.5281	61.1736	55.7573	52.1395	45.6029	38.9628	34.1904			13.9885	89.4077	0.792589	3	73.0057	1.27159	3	55.6116	3.73225	3	49.3677	4.97188	3	45.3579	4.62803	3	39.1799	4.94589	3	32.1772
	14.0511	89.92	75.0204	48.3769	39.3275	36.238	28.4552	21.528	19.3234	86.841	70.5844	58.7323	52.9601	48.3239	43.0268	36.4356	32.8842		13.4241	90.7232	75.4116	61.3264	56.7059	51.8097	45.865	38.8937	34.0125			14.0511	88.931	1.04548	3	73.2838	1.36807	3	55.971	3.84386	3	49.4165	5.11834	3	45.2593	4.58729	3	38.9719	5.30407	3	32.1705
	14.114	89.8578	75.0448	48.7736	39.9258	35.9203	28.3301	21.2257	19.039	87.5111	70.6663	58.0532	52.7251	47.9439	42.4799	35.758	32.9987		13.4869	90.5704	74.7903	61.246	55.8799	51.6943	46.1187	39.1789	33.7456			14.114	89.0633	0.776171	3	73.5756	1.45463	3	55.6759	3.50641	3	49.5621	4.91197	3	45.1065	4.70359	3	38.8578	5.34856	3	31.9361
	14.1766	89.135	75.4196	48.5145	39.5214	35.9032	28.1334	21.3265	19.0864	86.9864	70.6172	58.7826	53.5173	47.8257	42.7961	36.1336	32.893		13.5495	90.6796	74.767	61.6961	56.0762	51.9499	45.7467	38.9888	33.5053			14.1766	88.4001	0.707044	3	73.4511	1.45231	3	56.2641	3.95312	3	49.5332	5.04058	3	45.0504	4.68996	3	38.7145	5.33639	3	32.1438
	14.2392	89.4536	73.7575	48.9355	39.4455	35.9633	29.0274	21.2807	19.2096	87.4465	70.7155	57.4663	52.6728	47.7413	42.8901	36.4928	32.7257		13.6121	90.5341	75.1864	61.4952	55.9535	52.2384	46.1018	39.0752	34.0036			14.2392	88.9604	0.772108	3	73.168	1.28019	3	55.7406	3.53759	3	49.1419	4.90751	3	44.8884	4.55828	3	39.0748	5.07194	3	32.0351
	14.302	90.2697	74.6863	48.466	39.4371	35.8688	28.2496	21.4639	19.2475	88.2054	70.4287	58.1454	52.7599	48.1128	42.497	36.1091	32.8402		13.6749	91.4144	74.9845	61.7203	56.5587	51.6366	45.6706	38.9542	33.9324			14.302	89.5121	0.656108	3	73.2215	1.39699	3	55.8426	3.77406	3	49.5144	5.14388	3	45.1621	4.74868	3	38.6	5.22753	3	32.0691
	14.3647	90.2775	74.6537	47.6564	39.3444	35.7143	27.8473	21.8487	19.1907	87.7371	70.2647	58.0699	52.5248	47.6991	42.9243	35.9458	32.8842		13.7376	89.8137	74.2622	60.9405	56.4033	51.8344	45.5268	38.2627	34.0125			14.3647	89.6714	0.989366	3	73.1249	1.43124	3	55.4484	3.96488	3	49.0262	4.90253	3	44.9397	4.73518	3	38.7859	5.52299	3	32.1919
	14.4275	89.2982	75.167	48.1017	39.0579	35.3966	28.4195	21.1524	18.8874	87.4788	69.8631	58.2376	53.0124	48.0875	42.6423	35.9948	32.9282		13.8004	90.2576	75.233	60.8601	55.9863	51.6531	45.7551	39.1184	33.6833			14.4275	88.7617	0.644312	3	73.1233	1.6475	3	55.6822	3.85675	3	49.1014	5.06253	3	44.8561	4.80819	3	38.7247	5.20175	3	31.7371
	14.4903	90.2619	74.9552	47.8102	39.4118	35.8259	27.7758	21.1616	19.058	86.8895	70.904	58.7994	52.5858	48.1128	42.7534	35.9295	33.0251		13.8632	89.69	74.9068	61.2701	55.1521	51.6943	45.5353	39.3172	33.8345			14.4903	88.8914	1.02344	3	73.423	1.26929	3	55.8125	4.04377	3	49.2571	5.00791	3	45.0818	4.71892	3	38.6741	5.50622	3	31.92
	14.553	90.5806	75.5581	48.0207	39.0579	35.6198	27.8741	21.4456	19.2665	88.1812	70.4123	57.6675	52.8557	47.7666	42.7876	35.9621	32.8842		13.9259	90.3085	74.0214	61.2299	55.7982	51.7025	45.4507	39.0925	33.7722			14.553	89.644	0.740943	3	73.4911	1.56926	3	55.6153	3.92865	3	49.0273	5.02924	3	44.9967	4.81748	3	38.5125	5.35321	3	31.7922
	14.6159	89.6324	75.2811	48.2231	39.2601	34.976	28.1244	21.0333	19.058	88.5202	70.6827	57.8519	52.5945	48.0537	42.1296	35.7743	32.5319		13.9888	90.9415	73.9671	60.7476	56.158	51.6201	45.2731	38.6171	33.4964			14.6159	89.6908	0.693276	3	73.5692	1.45153	3	55.5995	3.78021	3	48.8032	4.805	3	44.6222	4.88956	3	38.4583	5.23859	3	31.935
	14.6786	88.9873	73.6842	47.2274	39.0326	35.4138	27.7937	20.5295	18.6789	88.0116	69.8877	58.246	52.6902	47.6484	42.7534	35.9784	32.8754		14.0515	90.032	74.2467	60.8039	55.9617	51.2161	45.4338	38.548	33.621			14.6786	89.1195	0.680964	3	72.28	1.20216	3	55.2864	4.07658	3	48.8847	4.96835	3	44.7897	4.80542	3	38.5222	5.40399	3	31.7141
	14.7413	89.9821	74.1568	47.7212	39.4202	35.3709	27.7758	21.0975	18.5747	87.7049	69.2976	57.8352	52.9253	47.9524	42.2663	35.9866	32.5583		14.1142	89.821	75.0155	60.201	56.0353	51.4552	45.7636	38.8245	33.4342			14.7413	89.0675	0.694499	3	72.5101	1.60639	3	55.4561	3.96176	3	49.0814	4.86404	3	44.7585	4.77303	3	38.3595	5.35192	3	31.9436
	14.8039	90.7982	74.3849	47.7779	38.7377	35.6027	27.8831	21.1158	18.9727	87.7614	70.9286	57.9358	52.3507	47.8342	42.5397	35.6356	32.5495		14.1768	89.0789	74.3166	61.4952	55.561	51.4222	45.2139	38.9715	33.4609			14.8039	89.7245	0.983027	3	73.1479	1.11207	3	55.6345	4.03904	3	48.8586	5.14083	3	44.9695	4.79969	3	38.4131	5.30588	3	31.6339
	14.8667	89.2205	74.5641	46.936	39.4624	34.9845	28.1155	20.7677	18.9727	87.164	70.6499	57.7262	51.9589	47.2515	42.779	35.7825	32.7785		14.2396	89.9811	75.0311	60.8199	55.3075	50.9605	45.307	38.3319	33.6299			14.8667	88.6624	0.757301	3	73.1924	1.27255	3	54.9892	4.09488	3	48.9341	4.83782	3	44.2779	4.74604	3	38.6324	5.29746	3	31.4891
	14.9295	90.0521	74.9063	47.8507	39.0158	34.8472	27.9009	20.6761	18.9727	87.0913	69.9943	57.5752	52.046	47.0996	41.8817	35.5213	32.7697		14.3024	90.0611	74.5495	60.9164	56.3461	51.5047	45.0533	38.6344	33.6121			14.9294	89.2404	1.08519	3	72.9378	1.49944	3	55.3965	3.88356	3	48.8524	5.01814	3	44.3849	4.9141	3	38.1659	5.19724	3	31.3023
	14.9921	88.8785	74.67	47.705	39.159	34.727	27.6149	20.5661	18.9443	87.7694	70.5926	58.1035	52.1417	48.1128	42.1381	35.5621	32.3294		14.365	90.9997	74.4564	60.619	55.2094	51.4057	45.586	38.7813	33.5854			14.9921	88.8472	0.613441	3	73.2396	1.32498	3	55.6098	4.04112	3	48.7168	4.84238	3	44.5122	4.94912	3	38.249	5.38061	3	31.4089
	15.0548	88.4588	75.167	47.8183	38.9231	34.83	27.6953	21.1982	18.7168	87.7694	70.0189	57.6842	52.0111	47.0827	41.9501	35.5049	32.1444		14.4277	89.5081	74.3399	60.7074	55.2339	51.0842	45.1125	38.064	33.6922			15.0548	88.7195	0.637211	3	73.2037	1.60677	3	55.2961	3.81937	3	48.7309	4.9927	3	44.2691	4.84612	3	38.1145	5.26964	3	31.5257
	15.1176	89.9044	73.6353	47.1545	39.0579	34.8128	27.4093	20.7036	19.1054	88.052	69.4451	57.6004	52.133	47.1924	41.6852	35.5049	32.6728		14.4905	89.5227	74.4098	60.828	55.7736	51.3068	45.493	38.669	33.5587			15.1175	89.23	0.59108	3	72.3026	1.4298	3	55.0228	4.01134	3	49.0972	5.14868	3	44.1158	4.73952	3	37.8801	5.30016	3	31.4242
	15.1802	89.1195	73.0732	47.5998	38.9399	34.9159	27.454	20.6119	18.6126	87.616	69.9041	57.4914	52.49	47.7497	41.9074	35.807	32.118		14.5531	90.1703	74.503	61.1576	55.1685	51.6036	44.8757	37.9689	33.7011			15.1802	88.4884	0.450446	3	72.4287	1.31172	3	55.1912	3.89266	3	48.9206	5.05735	3	44.4184	4.82145	3	37.8451	5.23658	3	31.4367
	15.243	89.0495	73.5864	47.1788	38.35	35.0189	27.5612	20.8318	18.6694	87.6241	69.9369	58.2628	52.6206	47.6822	41.8134	36.0029	32.6816		14.6159	90.9197	74.7437	60.7235	54.5551	50.8368	45.1209	38.9974	32.9448			15.243	88.7467	0.580764	3	72.6236	1.36123	3	55.1767	4.0335	3	48.7376	5.2486	3	44.7875	5.01754	3	37.8777	5.20628	3	31.4773
	15.3057	89.3215	73.7575	47.106	38.5102	34.5982	26.8282	20.786	18.5462	87.7129	70.3795	56.6949	52.4465	47.2093	41.8475	35.4396	32.5143		14.6787	90.3594	73.2681	60.3859	54.9313	51.3068	45.0194	38.6344	33.0694			15.3057	89.1434	0.779586	3	72.9577	1.31967	3	54.7905	4.00187	3	48.5584	5.06678	3	43.94	4.74045	3	37.7321	5.50629	3	31.4183
	15.3685	89.7801	73.5783	47.7779	38.1984	34.6927	27.1858	20.6303	18.442	85.9207	69.7402	56.9297	51.9676	46.9307	42.4116	35.4641	32.5143		14.7414	89.5154	74.0758	60.8119	54.8986	50.9523	45.0364	38.7468	33.3185			15.3685	88.2938	1.19911	3	72.4855	1.38212	3	55.1946	3.87941	3	48.4176	5.18832	3	44.1369	4.85159	3	37.8307	5.33967	3	31.3314
	15.4314	90.0132	73.1058	46.7174	38.2911	34.2806	27.2036	20.6394	18.6884	85.6382	70.0434	57.5585	51.9589	47.2853	42.121	35.2355	32.2325		14.8043	90.6141	74.1302	61.1897	55.4874	51.4717	44.8165	38.1504	32.847			15.4314	88.4108	1.3919	3	72.4472	1.24212	3	54.7559	4.0802	3	48.5273	5.20994	3	43.9336	4.90106	3	37.9202	5.39979	3	31.2323
	15.4942	88.964	74.3278	47.0574	38.2405	34.4609	27.4182	20.502	18.2809	86.6069	70.0516	57.5166	52.4203	47.0151	42.309	35.4478	31.7657		14.8671	89.6027	74.3632	60.3055	55.3811	50.5977	45.0025	37.917	33.1851			15.4942	88.2894	0.846697	3	73.1369	1.55591	3	54.7964	3.92596	3	48.5525	5.20938	3	43.9201	4.82289	3	38.1192	5.39232	3	31.2486
	15.5569	89.3448	74.173	46.7255	38.131	34.727	27.293	20.4562	18.7168	86.8088	70.1254	58.1705	52.0111	47.2515	42.2748	35.2763	32.3382		14.9298	90.5777	73.9127	60.7637	55.4956	51.2078	44.715	37.7096	32.9359			15.5569	88.5418	0.867293	3	72.706	1.29432	3	54.9707	4.15689	3	48.2924	5.1412	3	43.9832	4.69423	3	38.0746	5.43441	3	31.2079
	15.6195	90.3085	73.6679	47.5107	38.2742	34.4093	27.2394	20.4745	18.7547	87.1882	70.5598	57.4327	51.8109	47.0151	41.7535	35.3335	32.2941		14.9924	89.8938	74.4564	61.0209	54.8495	50.6967	44.9941	38.0985	32.9181			15.6195	88.9628	0.925948	3	72.8015	1.13043	3	55.0535	3.85608	3	48.1998	5.02377	3	43.9469	4.86883	3	37.9421	5.42471	3	31.1725
	15.6823	89.3215	74.3278	46.5798	38.1647	34.3492	27.1321	20.3371	18.3283	86.841	69.7894	56.8542	51.7848	47.2853	41.9501	35.4315	31.9947		15.0552	89.9302	74.4253	60.3859	55.2584	50.8946	44.6981	37.8738	33.0516			15.6823	88.6927	0.941589	3	72.9252	1.5708	3	54.4967	4.06498	3	48.4272	5.23242	3	44.1077	4.97713	3	37.6787	5.30494	3	31.0672
	15.7452	89.7567	72.8858	46.515	37.836	34.4437	27.1947	20.218	18.0534	86.2679	69.5763	57.2315	52.4378	47.4542	41.6852	35.3743	32.2941		15.1181	89.7337	73.8273	60.3135	56.1008	50.3422	44.5459	38.064	32.9093			15.7452	88.8529	1.31185	3	66.8955	4.43949	3	46.3105	6.36513	3	39.6704	6.90293	3	35.6787	6.47163	3	30.2828	5.89742	3	25.595
	15.8078	88.9873	73.6027	46.766	38.6871	34.2462	27.2752	20.5387	18.7832	86.7765	70.2811	57.1225	51.7413	47.1418	41.7706	35.6601	32.4351		15.1807	88.7296	74.3088	60.4823	55.332	50.5895	44.1739	37.8911	33.0872			15.8078	89.0521	1.33296	3	67.5196	4.52505	3	46.4784	6.23008	3	39.7791	6.61366	3	35.4592	6.42345	3	30.2254	5.99822	3	25.6848
	15.8705	89.6091	74.3767	46.2317	37.9203	34.023	26.6941	20.2547	18.1103	86.2598	70.527	57.2399	50.9751	47.2938	41.9586	35.1212	32.2237		15.2434	89.5664	74.3476	60.0884	55.2421	51.6613	44.2584	37.5972	32.6601			15.8705	89.1405	1.54578	3	67.6784	4.90114	3	46.1947	6.38764	3	39.3581	6.33295	3	35.3366	6.55729	3	30.0352	6.15075	3	25.1973
	15.9331	89.4847	73.8879	47.4136	37.8444	33.7912	26.9712	20.3921	18.5462	86.9218	69.6009	57.2231	51.8631	47.0911	41.4801	35.26	32.1885		15.306	90.3958	74.7359	60.5707	54.7187	50.0124	44.5205	38.0294	33.3274			15.9331	88.8783	1.00156	3	67.0566	4.84841	3	46.5322	6.44195	3	39.5225	6.69324	3	34.9142	6.72966	3	29.5198	6.29975	3	24.9725
	15.9958	89.0884	74.2953	45.9079	38.1394	34.581	26.9623	20.3829	18.423	86.7361	70.3139	56.829	51.5845	47.4457	41.6937	35.2845	32.1092		15.3687	89.1807	74.1379	60.8762	55.0867	50.7874	43.8948	37.8997	33.2117			15.9958	89.0675	1.34006	3	67.0236	5.4046	3	45.6444	6.53488	3	39.179	6.88185	3	35.3781	6.74895	3	29.6529	6.3199	3	24.7154
	16.0585	89.2593	73.0895	46.515	37.9961	34.7957	27.1232	20.2822	18.044	87.8663	70.0107	56.4434	51.3495	46.8547	41.4801	35.0804	31.9066		15.4314	89.5809	74.1923	59.992	55.332	50.235	44.436	37.822	32.9626			16.0585	89.3024	0.841797	3	66.9943	4.64161	3	45.962	6.2172	3	39.1102	6.76772	3	35.3351	6.50074	3	29.4775	6.35996	3	24.487
	16.1214	89.4381	72.2503	46.4745	37.4568	34.023	26.6047	20.3371	17.7976	86.0095	69.2238	57.6256	51.3408	46.9645	41.4801	35.0151	32.2325		15.4943	89.2971	75.0311	59.8151	54.9967	50.2844	44.6305	37.796	32.8381			16.1214	88.9928	1.60934	3	66.4963	4.32978	3	46.4149	6.48974	3	39.0638	6.67276	3	35.0152	6.63109	3	29.2511	6.43399	3	24.4116
	16.184	89.9122	74.9145	46.0293	37.6928	34.2806	26.3901	20.4929	18.4041	87.4788	70.0926	57.156	51.2015	46.7787	41.0101	35.0559	32.2589		15.557	89.4718	73.8195	60.0161	54.735	49.9711	44.6558	37.8911	33.0516			16.184	89.5024	1.06981	3	67.7491	4.95403	3	45.8581	6.57281	3	39.1942	6.54221	3	34.9484	6.64582	3	28.9637	6.34391	3	24.3647
	16.2468	88.1324	73.5213	46.1831	37.954	33.9973	26.8997	20.1264	18.224	86.9864	69.8058	57.8855	51.1666	46.5423	41.3946	34.8028	32.5231		15.6197	89.3917	74.1768	60.217	54.5142	50.4164	44.8334	37.7096	32.7847			16.2467	88.6868	1.17491	3	67.2123	4.57856	3	46.1124	6.81773	3	39.1115	6.6511	3	34.8274	6.53714	3	29.2308	6.45598	3	24.0718
	17.37	84.3009	68.8284	40.5893	35.7715	22.0982	18.0225	12.5779	11.5428	87.2285	69.3222	57.2986	51.7064	46.7111	41.1126	35.5784	31.8362		16.7429	89.9156	74.6583	60.0563	55.332	50.6884	43.954	37.433	32.5979			17.37	87.4879	1.91926	3	65.3316	3.74646	3	44.0789	6.85092	3	38.6484	6.86101	3	30.9366	7.90638	3	26.1354	7.49727	3	21.719
	17.4326	84.7051	68.5351	41.7955	35.8305	22.3644	17.5666	12.1107	11.1448	79.1233	55.3479	34.7615	28.6871	25.2976	22.6115	20.965	21.277		16.8055	90.5341	58.2246	35.1849	28.7373	25.1381	21.9685	21.1927	20.8363			17.4325	81.9142	2.79089	2	61.9415	6.59359	2	38.2785	3.51702	2	32.2588	3.57167	2	23.831	1.46664	2	20.0891	2.52246	2	16.5378
	17.4953	84.0989	67.9485	42.0465	36.3361	23.0769	17.5934	12.0374	10.8321	79.8095	55.9216	35.7592	29.2356	25.2892	22.7141	20.6711	21.5852		16.8682	91.3926	58.6751	35.5466	28.9091	24.9897	21.6303	20.8557	20.2135			17.4953	81.9542	2.14469	2	61.9351	6.01343	2	38.9028	3.14364	2	32.7858	3.55023	2	24.1831	1.10614	2	20.1537	2.56033	2	16.3542
	17.558	83.8346	68.1603	42.4512	36.2012	23.2057	17.7454	11.8725	10.5572	80.2858	55.8315	36.279	29.3314	25.2216	22.1928	20.7201	20.6781		16.9309	91.5527	58.1314	35.1125	29.1789	24.6929	21.4527	20.2161	19.2883			17.558	82.0602	1.77442	2	61.9959	6.16442	2	39.3651	3.0861	2	32.7663	3.43493	2	24.2137	1.00798	2	19.9691	2.2237	2	16.2963
	17.6206	85.2025	67.9567	43.5603	36.8417	23.7895	18.0493	11.7809	10.2635	79.6319	56.0118	35.9353	29.8537	24.7741	22.0475	20.0425	20.0881		16.9935	90.2285	57.681	34.9598	28.86	23.8602	20.1082	19.2653	18.6566			17.6206	82.4172	2.7853	2	61.9842	5.97243	2	39.7478	3.8125	2	33.3477	3.49397	2	24.2818	0.49232	2	20.0484	1.99908	2	15.9117
	17.6834	78.8995	69.3824	43.8031	37.381	24.5364	18.398	11.8175	9.95072	79.6884	54.7168	35.3232	29.5229	24.487	21.9535	19.7077	19.9119		17.0563	91.3781	56.4616	34.1961	27.8132	24.1075	20.3027	18.4788	18.452			17.6834	79.2939	0.394435	2	62.0496	7.3328	2	39.5632	4.23995	2	33.4519	3.92903	2	24.5117	0.02468	2	20.1758	1.77775	2	15.7626
	17.7461	77.7804	69.6106	44.1107	37.777	24.3218	18.0136	11.8267	10.0929	79.4462	54.8316	35.6334	29.2182	24.2591	21.6544	19.3485	19.2955		17.119	90.7814	57.8829	34.9277	27.985	24.3549	19.8292	18.0985	17.6779			17.7461	78.6133	0.83291	2	62.2211	7.3895	2	39.8721	4.23865	2	33.4976	4.27942	2	24.2904	0.031355	2	19.834	1.82041	2	15.5876
	17.8088	77.5084	69.6513	44.2726	37.3641	24.7339	18.2103	11.8633	9.69484	79.0829	54.9955	35.4909	29.2269	24.6644	21.5262	19.2669	18.8727		17.1817	91.5308	58.0149	35.1447	28.3939	24.058	19.6685	17.8825	16.8861			17.8088	78.2956	0.78728	2	62.3234	7.32791	2	39.8818	4.39088	2	33.2955	4.06862	2	24.6991	0.03475	2	19.8682	1.65799	2	15.5651
	17.8715	77.4617	70.1401	43.8922	37.5074	25.1803	18.541	11.7717	9.70432	79.204	55.2414	35.7676	29.105	24.5039	21.1331	18.9975	18.4324		17.2444	91.1161	58.2401	34.3891	28.6883	23.786	19.491	17.5454	17.1708			17.8715	78.3329	0.87114	2	62.6908	7.44938	2	39.8299	4.06229	2	33.3062	4.20118	2	24.8421	0.33818	2	19.8371	1.29605	2	15.3846
	17.9343	77.5628	68.804	44.1107	37.4989	25.249	18.6662	11.8267	9.39158	80.1324	55.8397	35.5077	29.5838	24.6137	21.3126	18.9322	18.1154		17.3072	90.9415	58.31	34.2685	28.2139	23.9426	19.3979	17.2861	16.3701			17.9342	78.8476	1.28482	2	62.3218	6.48215	2	39.8092	4.30154	2	33.5414	3.95756	2	24.9313	0.317635	2	19.9894	1.3232	2	15.3794
	17.9971	76.6535	69.3824	44.0136	37.6001	25.2747	18.5053	11.8175	9.24943	79.2605	55.5036	35.8011	29.3401	24.5208	20.9793	18.6138	17.6046		17.37	90.9342	57.8441	34.3489	28.4675	24.0003	19.2711	17.0009	16.2011			17.9971	77.957	1.30354	2	62.443	6.93939	2	39.9074	4.10624	2	33.4701	4.13	2	24.8978	0.37696	2	19.7423	1.23703	2	15.2156
initial velocity		0	4.72035	11.8588	15.444	17.2859	21.0125	27.7553	32.7224	3.14108	7.17953	11.4534	13.4666	19.9546	21.6122	27.7117	29.6219			3.13094	5.06665	12.1881	14.3893	17.3275	20.6644	25.4746	28.5573
normalized initial velocity										0	4.03845	8.31236	10.3255	16.8135	18.4711	24.5706	26.4809			0	1.93571	9.05719	11.2583	14.1965	17.5335	22.3436	25.4264
RAW DATA
		Mn concentration (uM)
		0	1	5	10	25	50	200	400	0	1	5	10	25	50	200	400			0	1	5	10	25	50	200	400
		12886	12960	12962	12717	12652	12644	12748	13421	13974	13771	13576	13404	13439	13465	14097	13391			13817	13686	13702	13777	14092	14024	14174	13684
		12816	12551	12431	12608	12575	12549	12633	13187	14042	13724	13496	13195	13300	13233	14005	13434			13734	13600	13611	13770	14067	14000	13990	13789
		12626	12621	12580	12407	12442	12570	12624	13011	13845	13566	13415	13088	13405	13252	13881	13413			13710	13719	13601	13706	14106	13986	14206	14125
		12453	12675	12394	12443	12232	12351	12486	13121	13818	13607	13308	13261	13390	13203	13771	13409			13865	13691	13532	13735	13876	13931	14076	13915
		12284	12471	12128	12218	12314	12457	12362	12546	13833	13642	13346	13320	13192	13194	13824	13338			13686	13581	13555	13624	13714	13858	14137	13862
		12399	12417	12459	12145	12140	12314	12322	12555	13818	13602	13130	13037	13143	13169	13751	13148			13725	13538	13435	13549	13907	13774	13913	13547
		12129	12314	12269	12280	12071	12216	12258	13039	13793	13657	13190	13141	13167	13116	13724	13200			13772	13544	13580	13600	13811	13911	13814	13547
		12119	12321	12148	12129	12119	12205	12394	12904	13769	13607	13128	12988	13138	13186	13716	13087			13488	13370	13334	13393	13755	13638	13774	13726
		12195	12332	12272	12130	12112	12036	12204	12474	13735	13484	13118	13048	13151	13107	13634	13162			13438	13379	13444	13507	13610	13672	13651	13591
		12236	12241	12014	12144	12231	12178	12294	12556	13614	13373	13258	12938	12958	13021	13466	12991			13458	13433	13273	13412	13643	13567	13682	13342
		11959	12353	12090	11964	12039	12016	12248	12508	13581	13296	13068	12942	12893	12989	13476	12969			13489	13241	13317	13357	13625	13476	13668	13386
		12073	12145	12042	11991	12071	12175	12144	12420	13521	13246	12942	12706	12903	12989	13422	12893			13355	13320	13230	13231	13557	13501	13570	13378
		11963	12073	11895	11972	11961	12074	12000	12366	13422	13278	12919	12741	12930	12819	13498	12793			13310	13247	13146	13230	13536	13421	13556	13470
		12147	12080	12058	11802	11936	11901	12149	12389	13296	13057	12958	12658	12796	12783	13338	12695			13150	13126	13031	13156	13383	13335	13441	13477
		12085	12081	11904	11746	11874	12029	11942	12231	13337	13105	12764	12640	12604	12703	13218	12634			13217	13288	12952	13085	13323	13261	13379	13102
		11853	11973	11806	11835	11854	11875	12006	12113	13232	13048	12704	12662	12736	12467	13344	12661			13235	13063	12992	12965	13321	13298	13301	13256
		11858	11903	11719	11819	11864	11843	11880	12226	13171	12935	12664	12585	12609	12570	13201	12426			13127	12959	12947	12972	13370	13226	13425	13166
		11878	11999	11774	11746	11729	11727	11862	12189	13076	12912	12600	12541	12551	12531	13044	12566			13145	13026	12874	12936	13325	13051	13552	13102
		11935	12011	11653	11766	11770	11779	11689	12196	13159	13006	12439	12373	12378	12471	13038	12315			13015	12803	12818	12944	13282	13247	13242	13022
		11859	12036	11625	11762	11683	11796	11820	12032	13067	12720	12560	12325	12417	12502	13039	12265			12950	12919	12769	12826	13088	12991	13228	12939
		11881	11968	11685	11668	11618	11724	11787	12063	12914	12752	12500	12345	12410	12344	12784	12252			12834	12628	12576	12665	12998	12949	13044	12938
		11790	11936	11741	11673	11676	11741	11707	12031	13001	12705	12253	12163	12471	12344	12932	12068			12740	12593	12449	12692	13059	12977	13055	12828
		11828	11847	11603	11601	11578	11780	11808	11823	12907	12663	12336	12128	12264	12384	12908	12083			12738	12816	12583	12688	13026	12925	12901	12640
		11715	11828	11521	11540	11570	11670	11665	11622	12812	12593	12162	12039	12142	12294	12937	11970			12793	12626	12461	12625	13038	12808	12835	12656
		11851	11853	11515	11471	11597	11686	11700	11768	12861	12739	12237	12063	12223	12249	12804	12030			12805	12539	12632	12451	12879	12870	12859	12685
		11772	11895	11447	11605	11552	11708	11586	11787	12819	12492	12230	11890	12073	12093	12715	11892			12745	12466	12457	12540	12944	12668	12807	12640
		11841	11663	11394	11524	11397	11562	11673	11525	12606	12358	12111	11971	12159	12222	12651	11775			12696	12514	12472	12544	12905	12737	12622	12511
		11706	11793	11594	11489	11567	11611	11578	11419	12685	12327	12151	11895	12068	12007	12618	11802			12722	12526	12261	12479	12821	12688	12677	12499
		11689	11752	11406	11519	11479	11399	11514	11920	12617	12398	11981	11994	11987	11918	12687	11791			12698	12272	12312	12349	12733	12712	12683	12461
		11654	11614	11338	11461	11384	11554	11437	11450	12587	12384	12069	11802	11922	12017	12624	11759			12567	12260	12122	12414	12816	12665	12722	12405
		11718	11708	11322	11485	11475	11426	11486	11335	12435	12253	12048	11716	11940	11959	12453	11677			12498	12270	12211	12223	12737	12652	12643	12428
		11625	11702	11385	11292	11330	11588	11532	11518	12457	12118	11755	11574	11837	11822	12343	11659			12442	12232	12255	12223	12585	12661	12543	12238
		11764	11566	11361	11319	11427	11464	11338	11588	12517	12067	11800	11650	11739	11790	12292	11589			12404	12108	12161	12284	12604	12609	12463	12236
		11686	11566	11198	11351	11414	11337	11257	11722	12411	12110	11804	11675	11682	11660	12413	11464			12504	12175	12054	12151	12591	12446	12462	12235
		11524	11549	11274	11386	11296	11409	11336	11667	12340	12063	11728	11494	11631	11736	12296	11488			12377	12138	12239	12049	12479	12459	12454	12109
		11539	11535	11298	11190	11138	11373	11315	11505	12203	12036	11664	11579	11668	11782	12182	11360			12237	11947	12314	12090	12539	12424	12336	12088
		11527	11532	11312	11214	11392	11325	11292	11507	12292	11994	11689	11513	11621	11662	12064	11423			12180	12105	12068	12059	12482	12293	12193	12128
		11387	11466	11148	11276	11190	11403	11226	11411	12058	11904	11678	11405	11647	11509	12154	11290			12293	11840	11910	11997	12368	12417	12388	12090
		11421	11439	11273	11260	11216	11319	11225	11663	12084	11841	11624	11421	11570	11538	12234	11369			12118	11842	11828	12092	12311	12256	12187	12086
		11539	11444	11191	11088	11294	11243	11149	11586	12161	11822	11685	11271	11581	11430	11949	11232			12167	11901	11848	11774	12316	12276	12359	11923
		11409	11378	11051	11106	11134	11357	11155	11214	11966	11799	11460	11298	11472	11364	12039	11203			12100	11875	11742	11979	12284	12138	12083	11912
		11296	11264	11075	11063	11176	11221	11225	11202	12056	11653	11474	11380	11546	11391	11840	11325			12131	11852	11699	11770	12249	12207	12272	12044
		11552	11393	11161	10991	10953	11017	11082	11536	12074	11716	11552	11234	11341	11389	11887	11061			12155	11807	11750	11794	12185	12065	12174	11915
		11379	11305	10996	10932	11084	11212	11158	11301	11941	11653	11306	11250	11362	11324	11887	11201			11938	11734	11703	11780	12085	12081	12107	11813
		11581	11298	10935	11037	11055	11043	11104	11296	12048	11567	11510	11152	11429	11283	11790	11040			11876	11706	11601	11681	12213	12127	11974	11672
		11411	11241	11021	10978	11016	11145	11092	11270	11827	11688	11339	11099	11363	11309	11744	11097			11965	11713	11688	11809	12135	11988	12013	11742
		11245	11427	10908	11105	10914	11095	11159	11396	12029	11545	11370	11066	11440	11314	11658	11039			11924	11771	11724	11837	12145	12017	12092	11813
		11240	11149	11100	10986	11016	11004	11087	11304	11774	11754	11358	11172	11323	11247	11760	11170			11835	11677	11546	11690	12046	11991	11998	11731
		11231	11053	10886	10958	10871	11066	11073	11449	11847	11709	11417	11088	11260	11205	11781	10823			11854	11689	11596	11793	11952	11862	11876	11669
		11179	11055	11036	10769	10807	11085	11174	11143	11973	11497	11339	11007	11388	11137	11630	10805			11755	11606	11667	11608	11998	11901	12013	11653
		11309	11059	11022	10933	10881	11025	10947	11154	11778	11533	11138	10877	11261	11187	11581	10853			11762	11552	11550	11629	12045	11943	12089	11659
		11265	11319	11033	10804	10874	10968	10809	11152	11836	11547	11218	11019	11285	11141	11819	10901			11819	11710	11652	11635	11807	11965	11811	11695
		11142	11195	10867	10864	10899	10991	10821	11423	11783	11463	11143	10939	11084	11121	11631	10688			11765	11754	11457	11549	11816	11672	12017	11567
		11175	11126	10890	10793	10895	10995	10902	11357	11768	11522	11100	10907	11062	10945	11704	10817			11821	11563	11479	11523	11775	11767	11839	11509
		11390	11136	10889	10728	10936	11011	10833	11156	11768	11452	11176	10879	11044	11048	11689	10723			11788	11497	11501	11567	11896	11870	11772	11484
		11209	11097	10884	10800	10751	10864	10800	11234	11536	11409	11123	10901	11029	10916	11487	10717			11722	11583	11416	11492	11778	11724	11736	11491
		11155	10994	10722	10828	10762	10912	10875	11027	11713	11445	11296	10862	11041	10958	11578	10620			11601	11473	11372	11552	11627	11743	11863	11467
		11186	11086	10881	10864	10784	10920	10805	11290	11547	11271	11165	10852	11081	11087	11537	10568			11601	11437	11390	11476	11735	11758	11798	11499
		11164	10935	10760	10748	10651	10895	10858	11208	11541	11273	11012	10717	11143	10988	11475	10648			11565	11490	11470	11426	11693	11723	11788	11455
		12535	12559	12393	12258	11969	12646	12647	12034	12598	12341	12221	11958	12084	12080	12615	11756			12599	12426	12447	12512	12587	12394	12495	12144
		12411	12618	12352	12202	11923	12399	12633	12353	12594	12256	12233	11891	11924	11899	12389	11779			12529	12411	12410	12294	12504	12465	12568	12628
		12406	12418	12367	12367	12055	12602	12580	12126	12706	12360	12189	11773	11926	12058	12585	11670			12523	12352	12508	12416	12572	12431	12658	12681
		12323	12323	12198	12344	12133	12455	12447	12036	12533	12183	12193	11727	11895	11895	12495	11651			12456	12272	12326	12207	12430	12281	12435	12439
		12192	12442	12201	12081	11816	12346	12510	12202	12554	12274	12118	11856	12009	11813	12300	11712			12564	12162	12223	12307	12538	12407	12306	12464
		12241	12407	12125	12060	11921	12365	12413	11896	12602	12260	12146	11920	11952	11979	12412	11763			12390	12229	12318	12245	12425	12255	12388	12430
		12107	12219	12096	12001	11823	12234	12251	11922	12499	12263	12115	11687	11834	11848	12326	11653			12397	12285	12258	12298	12471	12360	12438	12384
		12114	12247	11965	11963	11748	12027	12307	11727	12589	12225	11972	11743	11855	11825	12225	11639			12289	12121	12247	12136	12475	12297	12318	12307
		12120	12327	12115	11981	11714	12014	12151	11723	12413	12263	12037	11674	11687	11756	12374	11542			12360	12180	12163	12145	12355	12154	12374	12415
		12184	12187	12078	12023	11909	12143	12268	11752	12355	12269	12050	11703	11803	11786	12299	11549			12323	12164	12141	12084	12252	12160	12360	12258
		12138	12153	12123	11916	11808	12055	12335	11686	12527	12333	11988	11795	11805	11862	12267	11478			12355	12141	12252	12129	12344	12111	12288	12261
		12151	12239	12126	12011	11584	12170	12147	12128	12557	12334	12065	11661	11871	11812	12303	11540			12326	12217	12226	12161	12287	12292	12383	12187
		12124	12284	12051	11882	11722	12167	12133	11965	12458	12192	11977	11611	11777	11707	12304	11463			12334	12218	12241	12277	12355	12246	12419	12211
		12028	12154	11970	11925	11582	12019	12236	11734	12519	12080	11804	11613	11744	11788	12223	11442			12277	12183	12251	12050	12298	12339	12416	12175
		12080	12202	12019	11946	11622	12141	12281	11623	12522	12322	12026	11711	11951	11892	12333	11458			12297	12166	12221	12168	12443	12083	12399	12130
		12060	12072	11920	11781	11666	12017	12036	12013	12373	12098	11936	11557	11781	11740	12247	11401			12234	12140	12253	12043	12320	12182	12414	12168
		11993	12128	11885	11815	11647	11917	12049	11642	12568	12260	11923	11685	11925	11899	12209	11448			12284	12065	12166	12124	12303	12198	12414	12181
		11948	12062	11937	11655	11576	12017	12081	11674	12398	12136	12086	11644	11789	11771	12295	11461			12219	12098	12019	11968	12372	12302	12278	12012
		11951	12092	11883	11691	11666	12126	11911	11697	12384	12319	11995	11593	11807	11841	12291	11346			12434	12112	12131	12105	12311	12236	12355	12214
		11884	12002	11366	11799	11571	11874	11785	11700	12336	12239	11829	11633	11727	11814	12412	11402			12232	12216	12003	12111	12350	12220	12259	12235
		12867	12274	12353	11867	11648	11186	10916	10552	12387	12201	11927	11486	11843	11702	12249	11355			12229	12111	11945	11951	12461	12285	12364	11999
		13018	12120	12070	11702	11381	10872	10751	10347	12336	12219	11803	11450	11717	11690	12180	11286			12241	11869	11939	12041	12286	12119	12281	12228
		12827	12211	12007	11735	11208	10626	10354	9950	12411	12050	11868	11380	11772	11647	12236	11356			12185	12110	12053	11849	12317	12138	12114	12075
		12986	12170	11796	11419	11237	10517	10011	9601	12276	12127	11778	11331	11688	11614	12361	11486			12159	12021	11959	12005	12263	12166	12301	11912
		12741	12053	11864	11279	11050	10426	9794	9454	12208	12144	11708	11404	11582	11664	12208	11330			12085	11975	11922	11956	12199	12035	12229	11926
		12810	12044	11731	11171	10856	10185	9601	8985	12277	12134	11868	11391	11563	11566	12202	11342			12243	12047	11863	11998	12212	12156	12193	11921
		12700	11930	11515	11114	10600	9925	9470	8570	12259	11981	11837	11271	11612	11668	12254	11195			12123	12086	11890	12022	12260	12083	12203	12113
		12832	11894	11387	10899	10428	9965	9280	8548	12273	12122	11884	11504	11583	11713	12074	11285			11995	11950	11887	11924	12159	12045	12280	11917
		12858	12011	11355	10882	10395	9692	9055	8600	12185	11949	11710	11447	11593	11625	12104	11369			12086	12051	11960	11863	12188	12072	12190	11892
		12866	12021	11414	10858	10267	9624	8944	8221	12166	11878	11809	11400	11652	11663	12176	11322			12077	11905	11941	11974	12101	12019	12130	11813
		12808	12026	11346	10696	10336	9658	8766	7896	12387	11733	11255	10698	10426	10401	10077	9361			13744	12876	12440	12228	12129	11826	11570	11240
		12802	11903	11174	10553	10101	9436	8761	7840	12177	11722	11028	10500	10150	10011	9826	9034			13748	12741	12353	12199	11973	11574	11172	10973
		12693	11826	11147	10391	10088	9365	8474	7692	12187	11553	10954	10374	9982	9920	9688	8785			13480	12711	12272	11915	11826	11433	10989	10747
		12644	11804	11058	10445	10015	9197	8323	7334	12186	11503	10810	10060	9880	9690	9426	8544			13623	12627	11979	11780	11476	11209	10599	10367
		12768	11684	11247	10306	9921	9052	8200	7385	12293	11405	10548	10082	9762	9551	9200	8525			13503	12658	11909	11702	11376	10969	10413	10068
		12867	11729	10975	10143	9754	8975	8066	7304	12021	11377	10642	10031	9620	9323	9056	8191			13481	12567	11886	11486	11193	10914	10256	9876
		12776	11756	10794	10021	9678	8825	7893	7003	12088	11185	10389	9645	9513	9207	8847	8132			13602	12481	11791	11291	11052	10647	10073	9786
		12643	11747	10900	10079	9576	8663	7808	7007	12111	11281	10255	9638	9351	8979	8758	7955			13412	12563	11590	11213	10862	10493	9895	9429
		12564	11692	10783	9939	9499	8591	7669	6817	12144	11158	10192	9577	9287	8934	8634	7693			13526	12295	11466	11160	10781	10249	9713	9314
		12484	11710	10601	9759	9466	8546	7490	6773	12162	11205	10016	9547	9264	8829	8521	7465			13468	12286	11463	10970	10690	10117	9637	8978
		12638	11565	10552	9723	9340	8491	7357	6525	12048	11248	10199	9582	9079	8768	8412	7362			13473	12302	11393	10878	10623	10142	9376	8872
		12566	11526	10356	9785	9173	8363	7315	6314	12092	11228	10058	9303	9066	8575	8366	7205			13468	12360	11295	10887	10526	9957	9306	8667
		12594	11561	10371	9472	9072	8175	7199	6302	11990	10901	10043	9410	9027	8642	8172	7091			13442	12201	11260	10713	10445	9846	9135	8556
		12517	11453	10161	9420	9069	8072	7062	6191	12046	10956	9894	9176	8928	8520	8068	7156			13480	12248	11203	10777	10327	9835	9058	8421
		12522	11417	10236	9528	8964	8023	6959	6032	12120	11039	9797	9096	8834	8390	7933	6958			13336	12206	11083	10529	10218	9688	8931	8314
		12484	11387	10183	9341	8937	7849	6796	6027	12125	10975	9698	8950	8812	8347	8036	6886			13339	12262	11013	10572	10151	9526	8796	8219
		12564	11385	10129	9295	8873	7852	6675	6053	12033	10962	9711	8946	8641	8235	7902	6895			13454	12085	10959	10488	10105	9491	8729	8157
		12469	11445	10009	9061	8685	7710	6609	5784	11972	10741	9696	8886	8623	8136	7822	6650			13364	12153	10845	10292	10011	9458	8661	7919
		12392	11263	10056	9084	8638	7587	6619	5687	12167	10756	9578	8830	8549	8167	7617	6549			13365	12052	10764	10176	9976	9341	8424	7897
		12437	11308	10009	9004	8550	7538	6374	5635	11802	10743	9472	8710	8489	8071	7594	6491			13463	11981	10795	10190	9771	9172	8429	7747
		12428	11245	9832	8942	8533	7554	6381	5587	11832	10608	9399	8711	8420	7942	7476	6517			13314	12001	10595	10103	9672	9085	8376	7644
		12317	11131	9766	8845	8415	7323	6206	5420	11864	10532	9448	8609	8325	7950	7408	6354			13293	12028	10594	10093	9785	9010	8249	7520
		12313	11080	9743	8810	8297	7239	6144	5421	11969	10677	9224	8538	8282	7868	7458	6256			13274	11881	10512	9939	9555	9040	8154	7388
		12352	11161	9749	8701	8325	7303	6062	5434	11864	10685	9228	8477	8231	7736	7366	6226			13349	11959	10538	9929	9539	8987	8080	7413
		12302	11201	9638	8586	8188	7098	6001	5183	11932	10490	9149	8467	8246	7707	7321	6224			13315	11878	10392	9896	9519	8878	8129	7272
		12267	11015	9717	8687	8179	7165	5894	5180	11902	10665	9202	8479	8199	7696	7149	6209			13316	11725	10330	9852	9418	8825	7960	7195
		12275	11164	9521	8562	8115	7049	5862	5065	11811	10506	9190	8324	8244	7540	7165	6056			13220	11750	10373	9825	9347	8639	7917	7177
		12391	11139	9620	8551	8021	7045	5782	5081	11918	10408	9030	8385	8054	7484	7122	6077			13369	11790	10357	9587	9248	8582	7803	7100
		12346	11090	9553	8437	8050	6838	5721	4926	11853	10534	9056	8270	7955	7467	7135	5973			13193	11624	10182	9630	9225	8493	7709	7058
		12355	11165	9526	8459	7942	6938	5616	4873	11778	10347	8920	8275	7919	7440	6993	5953			13164	11691	10063	9607	9227	8479	7657	6861
		12312	11067	9498	8285	7862	6705	5615	4834	11832	10346	8954	8271	7832	7369	6907	5908			13069	11523	10040	9545	9024	8424	7541	6864
		12297	11162	9432	8341	7877	6655	5475	4764	11739	10210	8908	8193	7858	7378	6906	5858			13135	11508	10005	9405	9002	8388	7560	6648
		12260	10896	9360	8188	7759	6671	5490	4716	11620	10210	8907	8032	7735	7359	6792	5844			13144	11525	10100	9437	9010	8371	7541	6752
		12321	10889	9391	8113	7704	6669	5413	4707	11784	10182	8834	8081	7795	7285	6763	5714			13102	11509	9890	9394	8829	8206	7398	6708
		12288	10980	9271	8172	7669	6510	5251	4672	11711	10192	8713	7854	7674	7228	6654	5652			13163	11493	9888	9175	8874	8185	7340	6544
		12420	10989	9224	8009	7606	6505	5332	4534	11601	10045	8670	7916	7662	7080	6715	5649			13146	11390	9859	9128	8791	8070	7266	6562
		12126	10957	9138	7962	7560	6469	5244	4507	11750	10096	8668	7973	7748	7109	6659	5595			13009	11432	9757	9093	8694	8106	7168	6444
		12153	10941	9144	7961	7460	6360	5157	4490	11587	10016	8619	7828	7575	7052	6576	5621			12949	11441	9721	9222	8706	8129	7226	6370
		12117	10879	9106	7869	7467	6323	5147	4443	11632	9996	8578	7882	7571	7044	6520	5522			13121	11290	9696	9109	8650	7950	7154	6290
		12303	10755	9022	7933	7507	6299	5084	4390	11556	10030	8672	7797	7455	6948	6458	5621			12918	11362	9670	9032	8654	7907	6984	6330
		12131	10838	9025	7879	7324	6224	5061	4294	11566	10060	8619	7745	7576	6960	6510	5512			12978	11284	9603	9001	8614	7809	6961	6234
		12268	10862	8960	7804	7391	6284	4948	4364	11617	10012	8486	7685	7417	6897	6391	5421			13020	11283	9618	8966	8528	7806	7105	6261
		12302	10815	9006	7700	7396	6079	4848	4245	11758	9969	8532	7755	7414	6908	6411	5396			12998	11170	9624	8904	8463	7755	6909	6125
		12162	10875	9057	7701	7230	6103	4875	4200	11637	9944	8467	7637	7297	6797	6383	5420			13077	11189	9509	8890	8440	7803	6878	6131
		12187	10953	8817	7743	7243	6001	4819	4206	11631	9809	8426	7619	7338	6789	6401	5284			13002	11148	9528	8771	8361	7770	6822	6108
		12115	10791	8936	7621	7110	5985	4773	4145	11670	9873	8406	7640	7374	6780	6244	5336			13058	11086	9533	8913	8360	7690	6768	6005
		12262	10798	8783	7555	7148	5959	4710	4059	11613	9860	8430	7577	7319	6727	6254	5307			12902	11076	9379	8724	8330	7695	6685	6005
		12123	10710	8803	7512	7069	5950	4727	3963	11547	9867	8499	7640	7254	6681	6303	5306			12970	11033	9539	8828	8349	7594	6688	5901
		12227	10749	8765	7615	6978	5854	4624	4026	11652	9790	8340	7565	7259	6761	6176	5200			13018	10938	9327	8690	8307	7517	6600	5873
		12110	10792	8753	7548	6952	5774	4591	3940	11600	9757	8392	7521	7279	6685	6139	5282			13010	11002	9357	8681	8167	7579	6597	5968
		12030	10704	8744	7530	6904	5749	4667	3880	11684	9773	8257	7513	7218	6607	6179	5179			13007	11068	9400	8668	8289	7513	6648	5843
		12176	10778	8745	7454	6900	5736	4563	3878	11578	9808	8255	7391	7162	6632	6117	5214			12940	10992	9345	8543	8249	7536	6599	5820
		12092	10739	8494	7346	6832	5741	4483	3805	11612	9667	8274	7511	7197	6535	6146	5208			12962	11008	9257	8627	8113	7358	6514	5821
		12100	10713	8525	7369	6819	5678	4460	3820	11467	9750	8201	7434	7197	6546	6105	5088			12871	10876	9242	8657	8096	7416	6578	5702
		12154	10699	8615	7239	6755	5632	4423	3791	11391	9767	8255	7311	7144	6619	5992	5102			12876	10974	9301	8587	8097	7412	6479	5705
		12146	10548	8472	7233	6721	5542	4380	3734	11536	9690	8238	7369	7103	6538	6055	5078			12849	10956	9213	8574	8055	7317	6388	5610
		12094	10549	8461	7199	6644	5571	4399	3703	11469	9748	8258	7284	7124	6504	6010	5072			12883	10892	9103	8517	8061	7334	6343	5748
		12148	10639	8408	7146	6646	5537	4343	3675	11509	9667	8164	7357	7027	6440	5968	5013			12971	10890	9236	8486	8054	7268	6384	5571
		12106	10495	8378	7194	6660	5495	4300	3642	11502	9663	8168	7439	7011	6474	6022	5008			12925	10851	9147	8445	8041	7233	6304	5626
		11978	10580	8395	7092	6667	5463	4170	3670	11537	9631	8079	7307	6992	6454	5923	4974			12919	10991	9087	8525	7871	7216	6268	5559
		12120	10557	8298	7134	6641	5469	4256	3542	11508	9633	8147	7334	7010	6355	5977	4963			12912	10858	9127	8400	8009	7191	6267	5514
		12014	10488	8281	7026	6575	5381	4226	3533	11518	9586	8103	7290	6966	6414	5952	4943			13060	10872	9076	8414	7884	7201	6234	5417
		12025	10601	8250	7034	6545	5301	4164	3508	11414	9592	8128	7266	6931	6346	5822	4976			12837	10847	9152	8359	7912	7200	6191	5459
		12017	10527	8310	6987	6574	5334	4115	3507	11386	9593	8037	7214	6897	6398	5828	4954			12928	10711	9065	8301	7849	7101	6192	5454
		12007	10435	8312	7024	6543	5233	4098	3503	11399	9465	8050	7131	6901	6300	5835	4967			13012	10869	8962	8395	7887	7132	6149	5333
		12072	10535	8292	6897	6439	5241	4069	3443	11442	9531	8004	7200	6830	6313	5799	4898			12976	10789	9115	8380	7871	7006	6148	5457
		12213	10555	8303	6941	6342	5189	4030	3406	11468	9443	8018	7203	6860	6275	5730	4828			12731	10759	8922	8266	7858	6973	6200	5401
		12127	10480	8282	6958	6339	5195	3912	3368	11434	9547	8000	7188	6822	6253	5756	4853			12773	10805	8976	8330	7819	7044	6051	5375
		12060	10476	8151	6906	6423	5211	3968	3385	11436	9454	7975	7117	6809	6230	5808	4883			12869	10716	8958	8272	7786	7009	6110	5294
		12040	10456	8046	6838	6350	5142	3890	3286	11325	9367	8010	7154	6836	6299	5727	4810			12697	10720	8889	8232	7688	6953	5970	5248
		12063	10223	8119	6780	6278	5088	3922	3345	11323	9409	7968	7028	6698	6180	5619	4737			12865	10758	8878	8148	7695	6977	6007	5286
		11993	10415	8070	6739	6236	5134	3885	3289	11392	9460	7902	7160	6815	6123	5646	4801			12949	10781	8931	8198	7705	6990	5976	5207
		12028	10363	8054	6716	6308	5042	3857	3267	11298	9448	7845	7072	6772	6210	5639	4790			12822	10812	8838	8066	7708	6891	5969	5127
		12165	10347	7973	6725	6170	5018	3821	3167	11459	9491	7858	7031	6745	6128	5655	4802			12865	10651	8818	8179	7772	6927	5909	5171
		12053	10324	7918	6695	6147	5047	3812	3275	11422	9368	7943	7008	6715	6111	5691	4744			12936	10666	8824	8076	7673	6852	5957	5235
		12040	10216	7935	6720	6053	4974	3756	3221	11434	9329	7900	7004	6699	6063	5603	4679			12869	10584	8938	8145	7675	6901	5930	5146
		12036	10397	7970	6659	6169	4953	3744	3194	11420	9343	7878	7000	6727	6143	5603	4800			12741	10592	8890	8105	7655	6828	5884	5240
		11934	10308	7811	6641	6073	4967	3724	3144	11456	9274	7923	7070	6724	6139	5562	4691			12732	10750	8835	8166	7667	6792	5951	5123
		12040	10248	7920	6535	5992	4916	3705	3143	11402	9298	7836	6935	6737	6062	5578	4696			12778	10660	8771	8065	7533	6773	5878	5162
		11967	10318	7860	6507	6070	4798	3675	3092	11425	9348	7852	6972	6668	6074	5577	4696			12936	10653	8753	8094	7517	6768	5823	5116
		11858	10277	7956	6569	5956	4857	3650	3088	11288	9393	7948	6958	6687	6044	5494	4672			12854	10566	8764	7978	7524	6738	5793	5073
		12053	10253	7876	6481	6092	4815	3663	3098	11265	9293	7801	6952	6629	6017	5515	4713			13011	10534	8766	8021	7562	6753	5775	5022
		11983	10223	7787	6485	5948	4827	3664	3080	11232	9320	7748	6874	6618	5986	5436	4590			12780	10586	8650	8006	7451	6744	5719	5036
		11999	10322	7800	6500	5984	4726	3677	3025	11303	9318	7722	6906	6546	6029	5503	4622			12830	10535	8653	8085	7501	6738	5756	5022
		12133	10230	7760	6368	5969	4725	3580	3025	11406	9235	7747	6960	6541	6006	5527	4628			12774	10516	8664	7991	7478	6663	5758	4963
		11883	10297	7795	6419	5948	4709	3537	3028	11357	9212	7741	6917	6583	6018	5415	4581			12889	10539	8603	7888	7395	6671	5771	4916
		11881	10251	7732	6484	5917	4724	3548	2995	11285	9188	7693	6911	6550	5941	5463	4583			12748	10513	8564	7894	7391	6640	5759	4966
		11909	10191	7641	6332	5918	4705	3552	2926	11240	9100	7676	6933	6504	5918	5394	4583			12847	10508	8709	7991	7427	6629	5719	4873
		12043	10295	7680	6379	5843	4667	3479	2963	11307	9167	7756	6879	6601	5928	5400	4595			12734	10481	8665	8012	7468	6600	5663	4918
		11752	10035	7624	6311	5783	4679	3536	2999	11460	9133	7631	6853	6565	5913	5440	4545			12885	10570	8636	7877	7424	6580	5630	4848
		11858	10217	7582	6293	5767	4619	3473	2923	11257	9337	7651	6807	6499	5928	5361	4517			12841	10466	8495	7826	7292	6518	5673	4850
		11837	10129	7641	6264	5849	4618	3438	2883	11330	9213	7618	6870	6506	5923	5369	4488			12879	10390	8551	7905	7357	6525	5577	4780
		11731	10124	7640	6281	5768	4587	3500	2906	11357	9205	7623	6818	6497	5901	5316	4531			12800	10585	8576	7772	7349	6488	5581	4772
		11820	10137	7565	6209	5735	4565	3420	2883	11312	9224	7703	6782	6520	5899	5290	4500			12760	10450	8467	7808	7268	6480	5521	4790
		11786	10220	7577	6255	5669	4542	3447	2914	11273	9256	7654	6818	6535	5857	5290	4497			12870	10314	8461	7840	7316	6508	5552	4729
		11829	9984	7508	6201	5633	4531	3398	2884	11249	9181	7570	6777	6544	5801	5307	4496			12731	10462	8512	7748	7314	6426	5578	4758
		11904	10074	7433	6250	5620	4504	3400	2880	11403	9138	7632	6835	6451	5810	5310	4459			12732	10464	8545	7889	7301	6476	5530	4801
		11971	10054	7520	6115	5562	4502	3370	2804	11284	9178	7645	6699	6498	5797	5271	4458			12729	10323	8576	7688	7319	6477	5497	4718
		11754	10152	7532	6139	5597	4467	3334	2849	11227	9281	7679	6730	6466	5864	5283	4387			12656	10436	8466	7720	7307	6373	5437	4720
		11802	10112	7450	6142	5612	4476	3284	2792	11281	9170	7576	6766	6441	5831	5300	4483			12848	10478	8580	7796	7308	6487	5518	4796
		11864	10023	7471	6084	5575	4350	3311	2780	11193	9139	7648	6728	6472	5850	5283	4391			12621	10267	8470	7725	7212	6432	5460	4721
		11891	10081	7445	6055	5585	4401	3298	2789	11196	9056	7551	6740	6353	5827	5192	4413			12597	10321	8435	7666	7281	6428	5420	4722
		11843	9911	7304	6102	5558	4417	3257	2788	11241	9157	7498	6713	6456	5839	5249	4387			12625	10307	8415	7714	7238	6478	5399	4661
		11737	10079	7399	5941	5540	4366	3256	2740	11145	9046	7575	6761	6436	5771	5243	4353			12722	10425	8336	7654	7150	6400	5450	4617
		11827	10077	7404	6036	5483	4337	3271	2695	11241	9252	7622	6762	6423	5726	5196	4332			12706	10242	8409	7620	7119	6330	5429	4639
		11833	10024	7298	6035	5535	4349	3244	2705	11260	9073	7516	6738	6330	5716	5174	4357			12673	10344	8422	7647	7191	6334	5411	4656
		11658	10022	7381	5976	5556	4314	3239	2677	10927	9110	7554	6709	6350	5721	5223	4373			12819	10290	8401	7684	7221	6417	5408	4653
		11771	10092	7384	5875	5477	4240	3189	2699	11130	9092	7525	6723	6391	5797	5160	4357			12809	10272	8404	7710	7185	6384	5418	4660
		11926	9969	7348	5970	5502	4324	3147	2686	11213	9024	7499	6738	6362	5775	5228	4332			12660	10328	8257	7618	7152	6254	5304	4588
		11996	9925	7323	5912	5414	4266	3185	2662	11136	8997	7492	6678	6350	5710	5124	4339			12619	10320	8314	7637	7184	6307	5365	4566
		11698	9996	7254	5855	5412	4257	3216	2638	11187	9115	7494	6661	6293	5744	5150	4352			12569	10291	8328	7612	7174	6248	5370	4530
		11802	9867	7116	5943	5395	4218	3153	2651	11213	9075	7498	6672	6274	5728	5142	4296			12644	10138	8297	7655	7113	6243	5300	4598
		11822	10025	7209	5905	5325	4170	3103	2613	11158	9039	7540	6676	6268	5697	5086	4305			12669	10287	8224	7637	7110	6226	5298	4544
		11744	9945	7181	5812	5363	4170	3087	2627	11169	9067	7447	6681	6327	5680	5143	4336			12790	10310	8377	7669	7133	6283	5307	4519
		11803	9921	7141	5835	5325	4224	3065	2650	11237	9084	7426	6550	6298	5708	5123	4300			12721	10199	8231	7537	7064	6157	5275	4447
		11787	9957	7184	5832	5303	4184	3114	2659	11100	8942	7545	6638	6278	5603	5099	4263			12684	10158	8388	7547	7118	6291	5331	4529
		11744	9926	7165	5923	5315	4122	3088	2609	11174	9046	7401	6624	6236	5640	5101	4282			12511	10148	8323	7542	7045	6198	5225	4487
		11870	9905	7160	5748	5310	4160	3060	2590	11257	9006	7439	6598	6248	5641	5002	4231			12612	10408	8207	7620	7047	6317	5257	4490
		11764	9760	7079	5786	5273	4117	3037	2614	11215	9008	7441	6566	6192	5602	5059	4254			12534	10126	8272	7506	7015	6251	5235	4525
		11882	9822	7077	5770	5216	4121	3034	2587	11124	8934	7463	6584	6183	5567	5034	4224			12687	10148	8295	7526	7090	6186	5277	4489
		11672	10027	7133	5759	5259	4073	3006	2541	11161	8930	7459	6545	6241	5627	5039	4276			12711	10112	8197	7622	7076	6173	5258	4518
		11816	9926	7048	5721	5240	4025	3022	2590	11086	9060	7429	6581	6239	5645	5052	4236			12753	10223	8314	7566	7034	6141	5266	4514
		11766	9876	7128	5711	5208	4059	2992	2544	11135	9075	7379	6526	6259	5578	4982	4222			12811	10129	8242	7544	7043	6137	5220	4427
		11790	9730	6947	5675	5200	4074	2994	2526	11195	8991	7431	6604	6198	5619	4901	4188			12626	10189	8233	7542	7017	6088	5188	4427
		11606	9889	7036	5696	5157	4036	2951	2528	11205	8933	7421	6557	6174	5623	4964	4144			12691	10180	8290	7513	6928	6147	5224	4396
		11814	9885	6914	5617	5193	4020	2963	2507	11054	8893	7441	6556	6180	5538	4970	4181			12660	10151	8184	7490	6949	6104	5212	4381
		11716	9767	6960	5624	5137	4006	2914	2526	11176	8992	7412	6529	6185	5546	4943	4163			12790	10247	8063	7459	6947	6191	5163	4413
		11704	9863	6935	5582	5191	4019	2941	2495	11173	8940	7322	6508	6231	5548	5011	4211			12644	10228	8154	7505	6930	6103	5171	4402
		11669	9802	6922	5623	5112	3971	2922	2488	11119	8939	7409	6468	6202	5515	4909	4192			12727	10196	8213	7452	6982	6160	5103	4417
		11743	9889	7031	5597	5060	3970	2899	2512	11237	8927	7376	6559	6208	5543	4942	4127			12582	10077	8102	7508	6908	6078	5102	4336
		11704	9665	6980	5548	5051	3954	2963	2498	11130	9030	7314	6508	6146	5510	4972	4207			12600	10072	8070	7348	6860	5979	5142	4350
		11651	9719	6929	5639	5111	3954	2905	2471	11088	8865	7353	6456	6117	5492	4941	4206			12770	10166	8109	7403	6909	6003	5154	4364
		11673	9866	6845	5593	5022	3947	2906	2461	11127	8964	7324	6458	6230	5514	4904	4153			12683	10215	8132	7415	6943	6072	5106	4334
		11730	9724	6946	5535	5067	3861	2900	2436	11163	8780	7379	6458	6193	5469	4943	4134			12666	10011	8184	7465	6916	6074	5108	4361
		11781	9705	6902	5607	5022	3887	2866	2455	11136	8911	7274	6506	6087	5484	4909	4141			12640	10129	8192	7471	6884	6076	5091	4313
		11716	9770	6885	5497	4970	3910	2889	2416	11032	9064	7299	6473	6064	5519	4937	4147			12759	10116	8100	7411	6912	6018	5096	4326
		11739	9629	6916	5476	4991	3879	2864	2411	11135	8899	7257	6452	6116	5499	4880	4125			12600	10081	8115	7342	6918	6071	5069	4316
		11626	9706	6757	5491	4977	3861	2850	2410	11208	8962	7296	6439	6113	5493	4871	4170			12630	10096	8084	7350	6879	5945	5065	4329
		11700	9709	6810	5435	5001	3839	2824	2405	11224	8848	7292	6403	6151	5392	4875	4160			12692	9997	8114	7402	6877	6042	5054	4299
		11644	9751	6762	5538	4940	3841	2776	2397	11097	8822	7279	6393	6178	5480	4857	4111			12628	10036	8137	7397	6816	5986	5074	4320
		11727	9652	6671	5565	4930	3857	2792	2365	10954	8835	7273	6379	6083	5459	4862	4190			12584	9927	8078	7384	6825	6019	5031	4337
		11617	9686	6791	5499	4903	3811	2836	2401	11029	8850	7240	6449	6073	5367	4868	4081			12647	10014	8064	7384	6833	5992	5070	4325
		11725	9667	6762	5512	4919	3809	2780	2376	11034	8841	7216	6402	6077	5468	4883	4081			12730	10039	8048	7311	6830	5966	5071	4283
		11646	9632	6734	5464	4944	3765	2782	2361	11024	8947	7322	6428	6009	5408	4815	4050			12575	9956	8021	7347	6749	5939	5017	4240
		11716	9722	6728	5343	4956	3781	2774	2365	11019	8688	7262	6472	6071	5356	4811	4068			12614	10017	8066	7270	6768	5970	5017	4240
		11671	9634	6765	5402	4901	3786	2784	2370	11005	8774	7275	6428	6061	5518	4827	4060			12473	10010	8051	7296	6817	5854	4960	4265
		11647	9645	6673	5344	4914	3754	2716	2401	11092	8886	7260	6402	5967	5377	4812	4107			12571	10021	8039	7268	6761	5896	4953	4253
		11790	9554	6736	5367	4808	3842	2737	2349	11046	8740	7260	6424	6047	5351	4838	4036			12515	10025	8005	7296	6788	5819	4986	4191
		11692	9542	6729	5407	4858	3714	2749	2359	11089	8882	7236	6339	6051	5403	4796	4057			12773	10055	7844	7339	6694	5875	4945	4244
		11613	9611	6655	5299	4855	3716	2741	2298	11062	8863	7261	6445	6068	5427	4800	4010			12602	10031	8026	7263	6714	5904	4902	4220
		11578	9782	6638	5341	4894	3660	2709	2340	11079	8899	7197	6402	5968	5438	4788	4036			12657	9901	7950	7235	6739	5860	4983	4153
		11742	9577	6712	5333	4826	3794	2717	2324	11058	8843	7264	6401	5932	5386	4763	4054			12594	10016	8034	7199	6755	5888	4972	4193
		11730	9586	6656	5315	4778	3758	2690	2343	10940	8814	7161	6313	6049	5393	4793	4030			12578	10040	7943	7248	6668	5846	4965	4184
		11649	9581	6689	5289	4778	3685	2705	2340	10938	8668	7228	6354	6005	5369	4769	3993			12484	9979	8027	7225	6725	5843	4968	4160
		11539	9643	6599	5272	4797	3698	2653	2302	10996	8769	7264	6352	5998	5329	4784	4009			12534	10001	7989	7191	6732	5810	4897	4186
		11618	9670	6683	5278	4739	3667	2700	2288	11009	8824	7115	6374	6026	5294	4724	4016			12465	9857	7988	7170	6657	5802	4925	4192
		11804	9602	6597	5264	4761	3649	2683	2275	11033	8757	7218	6325	5947	5357	4714	4013			12636	10023	7990	7234	6671	5808	4907	4152
		11584	9552	6549	5292	4711	3637	2663	2310	10980	8746	7206	6334	5908	5285	4720	3990			12569	9840	7879	7127	6594	5753	4842	4127
		11614	9567	6684	5230	4755	3640	2687	2255	11036	8834	7120	6425	5962	5356	4722	3961			12451	9770	7923	7113	6711	5883	4850	4170
		11625	9569	6447	5257	4720	3613	2688	2255	11038	8751	7170	6376	5963	5337	4748	4000			12470	9914	7879	7105	6609	5774	4878	4134
		11733	9456	6582	5188	4753	3645	2667	2274	10987	8784	7179	6291	6059	5318	4729	3969			12464	9876	7905	7141	6661	5758	4799	4090
		11638	9446	6458	5230	4748	3577	2662	2234	11028	8789	7155	6318	5930	5311	4640	3949			12548	9936	7864	7198	6674	5730	4850	4089
		11617	9532	6559	5115	4666	3580	2641	2233	11050	8750	7155	6316	5980	5304	4637	3927			12586	9920	7870	7207	6653	5686	4846	4083
		11715	9464	6513	5214	4664	3563	2615	2253	10794	8663	7217	6333	5951	5324	4740	3913			12592	9998	7888	7167	6575	5721	4803	4075
		11616	9475	6484	5172	4598	3592	2596	2279	11022	8810	7092	6294	5977	5235	4711	4009			12604	9949	7800	7156	6585	5771	4853	4110
		11689	9567	6443	5137	4650	3586	2619	2241	11042	8756	7139	6253	5947	5310	4734	3945			12537	9830	7825	7111	6525	5722	4813	4090
		11609	9430	6478	5110	4652	3575	2581	2241	11058	8715	7165	6289	5969	5261	4702	3914			12455	9881	7897	7154	6606	5763	4759	4037
		11635	9431	6463	5050	4588	3548	2584	2224	11027	8690	7094	6261	5929	5288	4690	3959			12599	9915	7836	7166	6562	5732	4851	4083
		11666	9566	6396	5060	4662	3509	2603	2214	10951	8771	7176	6223	5901	5162	4657	3950			12534	9945	7899	7124	6597	5720	4764	4114
		11637	9324	6387	5102	4611	3522	2575	2239	11016	8777	7140	6241	5909	5186	4670	3883			12547	9872	7869	7098	6581	5740	4798	4049
		11648	9498	6444	5167	4612	3535	2565	2183	10889	8818	7136	6307	5891	5215	4626	3929			12502	9821	7829	7132	6535	5713	4810	4037
		11586	9351	6331	5088	4541	3492	2541	2254	10978	8712	7135	6219	5966	5250	4656	3897			12612	9846	7863	7130	6514	5637	4855	4061
		11626	9442	6396	5040	4610	3517	2555	2203	11063	8776	7088	6277	5890	5254	4687	3888			12635	9916	7832	7148	6560	5659	4747	4049
		11656	9325	6293	5083	4561	3490	2589	2191	11017	8695	7076	6199	5843	5240	4697	3931			12567	9905	7830	7144	6545	5704	4781	3976
		11628	9371	6349	5062	4584	3418	2547	2172	10938	8757	7100	6240	5857	5194	4606	3958			12413	9803	7814	7025	6468	5658	4744	3981
		11596	9267	6311	5139	4545	3497	2571	2190	10992	8650	7077	6259	5884	5237	4629	3889			12502	9884	7907	7107	6453	5668	4793	4066
		11546	9479	6417	5024	4524	3468	2531	2170	11034	8712	6981	6246	5918	5176	4560	3888			12418	9788	7832	7073	6489	5685	4781	4021
		11594	9380	6392	5072	4544	3478	2564	2172	10964	8706	7076	6239	5914	5225	4664	3880			12430	9643	7842	7078	6444	5635	4729	3978
		11662	9390	6341	5006	4511	3447	2569	2201	10858	8629	7122	6206	5935	5214	4605	3883			12552	9807	7888	7086	6465	5675	4736	4006
		11568	9435	6322	5031	4488	3484	2515	2147	10918	8729	7035	6184	5991	5245	4616	3875			12796	9818	7909	7110	6532	5627	4704	4008
		11639	9440	6308	4976	4510	3490	2552	2159	10904	8628	7048	6300	5944	5197	4604	3856			12482	9805	7891	7045	6483	5678	4711	3967
		11634	9364	6269	5008	4480	3469	2518	2137	10788	8659	7118	6136	5905	5176	4620	3899			12416	9765	7787	7045	6404	5642	4746	4000
		11559	9403	6317	5023	4448	3406	2484	2154	11031	8624	7033	6176	5839	5194	4579	3878			12528	9870	7781	7079	6460	5599	4718	4021
		11658	9342	6315	4962	4439	3382	2478	2147	10918	8694	7045	6142	5865	5180	4589	3834			12507	9762	7710	7025	6485	5620	4683	3990
		11504	9385	6292	5035	4426	3345	2517	2153	10902	8793	7077	6142	5783	5237	4558	3850			12595	9827	7713	7034	6494	5621	4743	4026
		11621	9351	6275	5008	4409	3388	2471	2150	10900	8685	7041	6251	5796	5189	4573	3901			12647	9758	7778	6988	6442	5640	4722	3990
		11561	9385	6264	5017	4468	3411	2477	2135	10959	8684	7048	6179	5835	5138	4537	3872			12555	9831	7706	7072	6475	5599	4648	3949
		11618	9401	6285	4874	4434	3366	2453	2111	11068	8634	7080	6153	5832	5134	4563	3842			12391	9687	7761	7056	6399	5593	4721	3997
		11502	9279	6156	4948	4400	3341	2476	2148	10910	8656	6977	6168	5804	5155	4549	3814			12587	9809	7737	7014	6459	5630	4663	3933
		11542	9347	6223	4877	4356	3392	2453	2092	10877	8616	6995	6217	5793	5190	4605	3868			12476	9824	7774	6987	6452	5563	4644	3984
		11610	9272	6250	4902	4345	3389	2466	2116	10990	8706	7086	6175	5797	5169	4564	3819			12398	9657	7720	7005	6476	5572	4735	3996
		11564	9345	6234	4849	4349	3375	2453	2131	10947	8601	7063	6180	5778	5154	4617	3822			12447	9730	7788	7021	6407	5593	4623	3975
		11698	9372	6200	4993	4373	3393	2486	2104	10958	8683	7049	6214	5822	5080	4526	3812			12436	9724	7728	6987	6395	5567	4672	3906
		11527	9373	6128	4877	4398	3369	2478	2123	11043	8690	7055	6169	5816	5115	4482	3842			12528	9797	7768	7095	6384	5554	4638	3939
		11656	9366	6170	4864	4433	3332	2443	2114	10940	8715	7016	6174	5801	5154	4558	3842			12480	9751	7697	7036	6337	5599	4689	3916
		11394	9210	6232	4829	4290	3303	2443	2111	10919	8674	6993	6070	5764	5132	4519	3826			12390	9713	7628	6968	6434	5586	4621	3879
		11637	9262	6130	4929	4373	3238	2435	2111	10920	8740	7033	6109	5830	5146	4522	3806			12460	9581	7701	6989	6405	5571	4687	3921
		11719	9375	6189	4840	4370	3278	2419	2103	10860	8573	7023	6114	5732	5135	4489	3814			12431	9828	7695	6949	6359	5598	4631	3928
		11584	9236	6139	4822	4346	3340	2410	2074	10914	8533	7024	6089	5765	5088	4533	3774			12393	9641	7735	6931	6362	5586	4644	3951
		11674	9329	6167	4858	4331	3262	2422	2074	10780	8748	7032	6167	5695	5118	4545	3773			12451	9739	7696	6973	6357	5460	4648	3863
		11466	9228	6107	4808	4312	3290	2450	2074	10966	8742	6962	6059	5784	5096	4570	3787			12353	9781	7592	7021	6344	5509	4553	3907
		11648	9286	6076	4830	4366	3224	2437	2065	10773	8646	7047	6091	5733	5065	4403	3820			12401	9722	7622	6924	6454	5476	4563	3863
		11815	9339	6077	4886	4289	3274	2409	2065	10875	8585	6969	6093	5733	5025	4507	3752			12389	9719	7648	7012	6364	5483	4592	3923
		11525	9250	6061	4830	4288	3280	2373	2057	10791	8759	7036	6081	5723	5088	4544	3808			12479	9740	7660	7045	6305	5485	4539	3874
		11567	9206	6114	4859	4227	3235	2381	2040	10962	8558	7026	6117	5794	5000	4502	3769			12474	9658	7660	6957	6398	5504	4585	3875
		11632	9237	6145	4771	4251	3280	2402	2076	10806	8642	6931	6061	5748	5031	4452	3831			12550	9736	7591	6965	6370	5493	4598	3864
		11561	9185	6023	4758	4286	3237	2388	2040	10966	8696	7065	6091	5751	5038	4418	3826			12550	9618	7675	6922	6285	5486	4603	3902
		11417	9339	6017	4784	4245	3262	2389	2067	10854	8571	6945	6046	5749	5006	4453	3776			12486	9640	7699	6884	6341	5481	4606	3854
		11464	9214	6072	4778	4257	3215	2366	2069	10865	8543	7009	6106	5718	5036	4408	3788			12401	9694	7643	6949	6364	5421	4556	3860
		11619	9214	5988	4785	4248	3208	2381	2027	10872	8516	6981	6109	5778	4996	4444	3752			12445	9797	7676	6881	6323	5432	4555	3853
		11547	9200	6023	4772	4202	3295	2362	2028	10901	8727	6943	6038	5794	5048	4432	3791			12416	9620	7629	6853	6287	5445	4541	3896
		11458	9125	6055	4716	4203	3256	2373	2057	10849	8548	6947	6112	5724	5073	4458	3810			12347	9664	7603	6877	6432	5410	4566	3823
		11479	9189	6066	4715	4195	3233	2331	2079	10842	8647	6933	6071	5684	5022	4460	3772			12596	9671	7585	6933	6393	5439	4493	3801
		11450	9152	5973	4709	4231	3287	2358	2021	10937	8600	6886	6003	5700	5018	4448	3731			12389	9725	7610	6818	6324	5393	4508	3843
		11570	9208	5976	4667	4221	3183	2350	2039	10757	8612	7005	6083	5723	5035	4463	3734			12469	9710	7629	6934	6284	5424	4500	3823
		11562	9211	6025	4738	4184	3169	2317	2009	10840	8622	6924	6056	5678	4971	4380	3747			12448	9630	7619	6833	6270	5454	4533	3793
		11469	9257	5993	4690	4182	3147	2328	2014	10775	8616	7011	6147	5664	5008	4426	3735			12463	9627	7675	6857	6301	5410	4511	3766
		11510	9053	6045	4681	4189	3247	2323	2027	10832	8628	6854	6050	5654	5019	4470	3716			12443	9681	7650	6842	6336	5452	4521	3822
		11615	9167	5987	4680	4178	3160	2343	2031	10926	8593	6935	6060	5698	4973	4423	3729			12564	9655	7678	6916	6263	5401	4507	3814
		11616	9163	5887	4669	4160	3115	2385	2025	10868	8573	6926	6033	5649	5023	4403	3734			12344	9562	7581	6897	6287	5384	4427	3823
		11490	9226	5942	4635	4123	3179	2309	1993	10836	8524	6946	6089	5695	4990	4409	3739			12405	9687	7571	6846	6265	5411	4526	3786
		11614	9200	5906	4677	4173	3107	2310	2011	10763	8651	7013	6040	5698	5003	4401	3750			12327	9645	7622	6744	6270	5385	4549	3803
		11655	9274	5932	4635	4149	3118	2341	2033	10923	8591	6878	6071	5657	5007	4405	3734			12412	9531	7617	6823	6271	5375	4523	3796
		11533	9240	5957	4659	4074	3146	2296	2011	10965	8624	6900	6041	5691	4930	4382	3694			12499	9524	7557	6867	6261	5354	4468	3765
		11450	9044	5834	4632	4125	3109	2241	1971	10902	8527	6947	6052	5643	5003	4407	3733			12374	9560	7564	6843	6212	5373	4460	3779
		11578	9102	5895	4678	4120	3107	2303	1960	10864	8455	6898	6079	5679	4946	4408	3697			12345	9659	7489	6852	6241	5412	4492	3758
		11683	9130	5902	4597	4147	3119	2305	2002	10871	8654	6910	6013	5665	4978	4365	3696			12243	9569	7650	6794	6237	5347	4509	3761
		11480	9152	5798	4683	4075	3145	2267	2002	10797	8620	6885	5968	5596	5006	4383	3722			12367	9661	7566	6763	6181	5358	4435	3780
		11587	9194	5911	4630	4059	3121	2257	2002	10788	8540	6867	5978	5578	4901	4351	3721			12378	9599	7578	6890	6247	5328	4470	3778
		11436	9165	5893	4647	4045	3089	2245	1999	10872	8613	6930	5989	5698	4931	4356	3671			12507	9587	7541	6751	6235	5391	4487	3775
		11382	9226	5907	4619	4057	3098	2314	1975	10872	8543	6880	5974	5576	4909	4349	3650			12302	9572	7552	6754	6196	5335	4404	3787
		11568	9038	5825	4635	4055	3066	2260	2016	10907	8473	6870	5988	5589	4878	4349	3710			12304	9581	7567	6820	6223	5380	4474	3772
		11467	8969	5880	4621	4067	3071	2250	1964	10853	8529	6857	6029	5655	4904	4386	3647			12393	9593	7608	6746	6259	5307	4393	3788
		11458	9032	5828	4551	4079	3083	2274	1970	10854	8533	6949	6044	5647	4893	4410	3711			12496	9624	7554	6671	6166	5336	4512	3703
		11493	9053	5819	4570	4030	3001	2269	1957	10865	8587	6762	6024	5591	4897	4341	3692			12419	9434	7512	6717	6223	5324	4470	3717
		11552	9031	5902	4533	4041	3041	2252	1946	10643	8509	6790	5969	5558	4963	4344	3692			12303	9538	7565	6713	6180	5326	4483	3745
		11582	8973	5771	4544	3993	3043	2253	1972	10608	8546	6865	5968	5600	4929	4316	3660			12454	9545	7612	6785	6243	5300	4414	3692
		11447	9123	5813	4538	4014	3067	2238	1929	10728	8547	6860	6021	5568	4951	4342	3607			12315	9575	7502	6772	6137	5322	4387	3730
		11496	9104	5772	4525	4045	3053	2233	1975	10753	8556	6938	5974	5596	4947	4321	3672			12449	9517	7559	6786	6211	5288	4363	3702
		11620	9042	5869	4542	4008	3047	2235	1979	10800	8609	6850	5951	5568	4886	4328	3667			12355	9587	7591	6707	6149	5321	4408	3700
		11493	9123	5754	4529	4001	3035	2220	1934	10757	8515	6781	5948	5600	4909	4340	3633			12360	9583	7512	6757	6173	5286	4382	3715
		11549	8946	5746	4490	4012	3042	2207	1905	10686	8489	6826	6023	5620	4878	4333	3667			12333	9506	7503	6860	6106	5268	4404	3699
		11450	9034	5777	4591	3989	3051	2242	1982	10749	8575	6813	5943	5583	4888	4368	3683			12195	9568	7524	6766	6136	5224	4384	3719
		11530	9129	5711	4500	3963	2986	2211	1911	10685	8605	6827	5855	5601	4910	4302	3659			12310	9573	7475	6755	6266	5234	4350	3671
		11514	9069	5857	4491	3936	3017	2226	1957	10767	8492	6825	5957	5577	4854	4319	3655			12424	9623	7535	6691	6066	5265	4400	3746
		11463	9119	5671	4526	4028	3016	2225	1944	10744	8579	6778	5925	5619	4879	4322	3646			12257	9546	7573	6736	6160	5191	4385	3733
		11485	8971	5746	4509	4053	3034	2214	1904	10884	8542	6732	5898	5549	4854	4297	3623			12312	9553	7463	6766	6093	5255	4376	3705
		11508	8868	5741	4445	3963	2976	2220	1878	10654	8446	6873	5897	5562	4854	4289	3660			12273	9661	7441	6725	6099	5278	4373	3691
		11569	9195	5686	4473	3993	2952	2237	1942	10836	8552	6817	5881	5540	4799	4294	3663			12297	9505	7466	6693	6061	5281	4384	3715
		11340	9024	5705	4504	3960	3009	2197	1923	10775	8517	6904	5877	5512	4844	4263	3693			12286	9551	7491	6666	6115	5302	4363	3685
		10847	8448	5014	4245	2574	2016	1373	1218	10805	8458	6834	5939	5532	4811	4358	3615			12358	9613	7471	6766	6148	5198	4331	3664
		10899	8412	5163	4252	2605	1965	1322	1176	9801	6753	4146	3295	2996	2646	2568	2416			12443	7497	4377	3514	3049	2598	2452	2342
		10821	8340	5194	4312	2688	1968	1314	1143	9886	6823	4265	3358	2995	2658	2532	2451			12561	7555	4422	3535	3031	2558	2413	2272
		10787	8366	5244	4296	2703	1985	1296	1114	9945	6812	4327	3369	2987	2597	2538	2348			12583	7485	4368	3568	2995	2537	2339	2168
		10963	8341	5381	4372	2771	2019	1286	1083	9864	6834	4286	3429	2934	2580	2455	2281			12401	7427	4349	3529	2894	2378	2229	2097
		10152	8516	5411	4436	2858	2058	1290	1050	9871	6676	4213	3391	2900	2569	2414	2261			12559	7270	4254	3401	2924	2401	2138	2074
		10008	8544	5449	4483	2833	2015	1291	1065	9841	6690	4250	3356	2873	2534	2370	2191			12477	7453	4345	3422	2954	2345	2094	1987
		9973	8549	5469	4434	2881	2037	1295	1023	9796	6710	4233	3357	2921	2519	2360	2143			12580	7470	4372	3472	2918	2326	2069	1898
		9967	8609	5422	4451	2933	2074	1285	1024	9811	6740	4266	3343	2902	2473	2327	2093			12523	7499	4278	3508	2885	2305	2030	1930
		9980	8445	5449	4450	2941	2088	1291	991	9926	6813	4235	3398	2915	2494	2319	2057			12499	7508	4263	3450	2904	2294	2000	1840
		9863	8516	5437	4462	2944	2070	1290	976	9818	6772	4270	3370	2904	2455	2280	1999			12498	7448	4273	3481	2911	2279	1967	1821
[truncated: 5 more columns]

## Sheet: Fig2B
EcoDMT
Manganese titration, normalized initial velocities from Fig1A
			Mn2+ (μM)	Vi (ΔF.min-1)
			0	0	0	0
			1	4.03845	1.93571	4.72035
			5	8.31236	9.05719	11.8588
			10	10.3255	11.2583	15.444
			25	16.8135	15.7361	17.2859
			50	18.4711	18.3223	21.0125
			200	24.5706	24.7593	27.7553
			400	26.4809	27.932	32.7224
				Km= 13.5 uM
				Vmax = 28

## Sheet: Fig2C
EcoDMT
Lipid to protein ration 50
Mn and Ca Competition
NORMALIZED DATA																				Condition
		Mn (uM)/Ca (mM)																		Mean	SEM	N
	Time (min)	0/0	50/0	50/0	50/0	50/2	50/2	50/2	50/2	0/0	50/0	50/0	50/0	50/0	50/2	50/2	50/2		Time (min)	0 μM Mn2+/ 0 mM Ca2+			50 μM Mn2+/ 0 mM Ca2+			50 μM Mn2+/ 2 mM Ca2+
	-9.80162	111.764	126.119	125.586	129.408	127.278	111.738	125.342	122.986	103.254	126.33	128.848	124.212	132.026	118.918	110.998	120.72		-9.80162	107.509	4.25495	2	127.504	1.01996	7	119.712	2.39458	7
	-9.72038	110.141	127.587	126.114	127.912	127.165	111.934	122.769	122.16	102.128	125.881	127.048	122.252	129.554	118.321	111.957	119.369		-9.72038	106.134	4.00675	2	126.621	0.863	7	119.096	2.13204	7
	-9.63902	109.459	124.035	123.914	128.592	127.149	110.292	121.499	121.326	102.014	125.417	124.586	123.057	130.329	117.653	109.695	120.068		-9.63902	105.737	3.7224	2	125.704	1.02427	7	118.24	2.38735	7
	-9.55762	109.214	124.951	124.876	127.289	127.383	111.068	122.397	121.645	100.397	124.551	123.747	120.717	129.408	117.26	110.008	118.924		-9.55762	104.805	4.40855	2	125.077	1.03234	7	118.383	2.35514	7
	-9.47623	107.338	124.169	121.902	126.865	124.109	108.868	121.191	121.037	100.05	122.965	123.408	120.125	127.497	115.916	109.208	115.001		-9.47623	103.694	3.6439	2	123.847	0.989711	7	116.476	2.2599	7
	-9.39485	108.334	122.606	121.484	124.73	123.746	109.274	120.058	120.452	100.585	122.589	122.415	119.813	127.489	115.806	109.657	114.747		-9.39485	104.46	3.87425	2	123.018	0.929197	7	116.249	2.08698	7
	-9.31347	108.477	122.046	121.224	125.21	123.545	108.777	120.641	119.641	99.7104	123.398	121.132	118.894	125.762	114.706	108.675	113.465		-9.31347	104.094	4.38333	2	122.524	0.919323	7	115.636	2.20775	7
	-9.23208	106.793	121.115	119.946	124.906	122.819	109.583	119.54	119.587	98.2689	122.116	120.244	117.526	125.217	115.586	107.89	112.936		-9.23208	102.531	4.26184	2	121.581	1.04289	7	115.42	2.10467	7
	-9.1507	106.097	120.957	121.216	123.171	121.609	108.581	119.443	117.575	97.331	121.844	120.082	116.987	125.977	114.085	108.233	111.746		-9.1507	101.714	4.38301	2	121.462	1.04306	7	114.468	1.991	7
	-9.06932	104.515	120.404	119.473	123.011	122.658	108.596	120.447	117.427	96.9281	119.921	119.743	116.995	124.449	113.503	107.799	112.153		-9.06932	100.721	3.79334	2	120.571	0.92743	7	114.655	2.16338	7
	-8.98793	105.865	120.444	119.158	121.572	122.44	108.966	118.747	116.304	96.6448	118.784	118.436	115.012	124.733	112.921	107.647	111.124		-8.98793	101.255	4.61013	2	119.734	1.13487	7	114.021	2.0367	7
	-8.90653	104.719	118.581	117.643	121.308	120.884	107.617	117.226	116.398	96.5127	118.448	117.871	115.293	123.067	112.544	107.312	110.034		-8.90653	100.616	4.10337	2	118.887	0.965134	7	113.145	1.96247	7
	-8.82515	105.108	118.407	117.967	121.164	120.843	108.589	117.849	115.938	95.8832	118.247	116.878	114.86	122.722	111.805	107.586	110.525		-8.82515	100.496	4.61246	2	118.606	0.989017	7	113.305	1.88564	7
	-8.74377	102.878	118.249	117.841	120.469	119.207	108.604	118.205	116.546	95.4488	117.863	117.846	114.358	123.352	111.632	108.545	110.84		-8.74377	99.1634	3.71459	2	118.568	1.04498	7	113.368	1.71093	7
	-8.66238	103.737	117.049	116.618	119.477	119.255	108.348	118.391	116.476	95.4425	118.135	117.225	113.69	123.39	111.868	107.456	109.596		-8.66238	99.5899	4.14738	2	117.941	1.12565	7	113.056	1.86122	7
	-8.581	102.353	117.752	116.697	119.597	118.344	109.011	117.874	115.634	94.9641	117.406	116.733	113.956	123.067	112.08	108.408	108.652		-8.581	98.6585	3.69439	2	117.887	1.07143	7	112.857	1.66083	7
	-8.49962	102.742	117.271	116.35	119.693	119.956	107.858	117.542	113.996	95.3292	116.413	115.594	114.222	121.256	110.037	108.005	110.471		-8.49962	99.0354	3.70619	2	117.257	0.91856	7	112.552	1.79402	7
	-8.41823	101.773	117.965	116.965	119.317	118.199	107.979	117.105	114.713	93.3967	116.485	116.515	112.543	121.486	110.902	108.043	110.126		-8.41823	97.585	4.18825	2	117.325	1.04716	7	112.438	1.59654	7
	-8.33685	102.994	119.796	116.681	118.246	117.126	108.491	116.741	114.183	94.3976	115.676	115.207	112.102	122.223	110.972	107.197	109.235		-8.33685	98.6957	4.29816	2	117.133	1.24964	7	111.992	1.5244	7
	-8.25547	103.158	116.339	116.721	118.981	118.271	109.493	116.984	113.31	93.7303	116.157	114.674	111.069	121.755	109.353	107.578	108.997		-8.25547	98.444	4.71364	2	116.528	1.26102	7	111.998	1.60164	7
	-8.17407	101.719	116.213	116.161	118.078	116.401	108.619	116.595	113.302	93.0316	114.515	113.996	111.95	119.621	109.479	106.771	108.875		-8.17407	97.3751	4.3435	2	115.79	0.973625	7	111.434	1.50268	7
	-8.0927	102.148	116.11	115.206	118.478	116.199	107.602	116.15	113.084	93.3652	113.361	113.924	110.583	119.483	109.526	106.413	108.145		-8.0927	97.7568	4.39154	2	115.306	1.15639	7	111.017	1.54924	7
	-8.01132	100.907	115.873	115.877	118.014	117.658	108.89	117.348	113.302	92.9498	113.385	114.158	110.697	118.907	109.141	107.136	107.784		-8.01132	96.9284	3.97862	2	115.273	1.06003	7	111.609	1.6939	7
	-7.92992	100.914	116.45	115.656	116.887	116.554	107.609	115.843	111.641	92.591	112.864	112.632	109.094	116.704	109.196	106.428	107.708		-7.92992	96.7524	4.16147	2	114.327	1.10054	7	110.711	1.54779	7
	-7.84875	100.211	115.85	115.033	115.399	115.11	107.835	113.844	112.6	91.2565	112.144	112.6	109.025	118.185	108.268	106.359	107.685		-7.84875	95.7339	4.47748	2	114.034	1.13504	7	110.243	1.32324	7
	-7.76742	100.825	115.155	114.694	116.511	113.506	107.858	114.993	110.628	91.6845	112.736	112.285	108.418	116.52	108.127	106.877	106.733		-7.76742	96.2549	4.57035	2	113.76	1.08853	7	109.817	1.25266	7
	-7.68603	101.207	114.705	114.039	115.823	114.304	107.218	113.618	111.899	91.6467	112.28	112.075	108.927	116.573	107.255	105.126	106.825		-7.68603	96.4269	4.78019	2	113.489	0.988267	7	109.463	1.4	7
	-7.60487	102.135	114.642	113.589	115.639	113.998	106.66	114.451	111.634	92.1503	111.407	113.125	107.438	116.305	106.264	105.743	107.239		-7.60487	97.1425	4.99214	2	113.163	1.13639	7	109.427	1.43941	7
	-7.52352	99.4408	113.821	113.085	115.487	113.417	106.63	114.362	110.503	90.3626	110.838	112.471	107.058	116.504	108.85	105.727	106.218		-7.52352	94.9017	4.53909	2	112.752	1.18505	7	109.387	1.32343	7
	-7.44213	99.4476	113.213	111.98	113.68	113.014	107.414	113.763	110.16	92.3455	110.229	112.18	107.969	116.128	107.451	105.453	106.694		-7.44213	95.8965	3.55106	2	112.197	0.981729	7	109.136	1.22308	7
	-7.36075	99.4135	112.574	111.018	114.624	114.457	108.077	112.695	109.934	90.9795	109.933	111.002	107.757	115.522	107.899	105.179	106.418		-7.36075	95.1965	4.21701	2	111.776	1.01774	7	109.237	1.26536	7
	-7.27937	100.191	112.124	112.927	114.24	113.82	107.218	113.949	109.84	90.0793	108.827	110.873	107.339	115.222	107.687	104.745	105.98		-7.27937	95.1352	5.05584	2	111.65	1.07441	7	109.034	1.38491	7
	-7.19798	99.3044	112.574	111.767	115.871	111.748	107.014	113.124	109.201	90.6899	109.404	110.8	106.359	114.247	106.642	104.653	105.804		-7.19798	94.9971	4.30722	2	111.575	1.1868	7	108.312	1.19426	7
	-7.11682	99.4408	113	111.531	114.448	111.587	106.359	114.249	108.764	89.8527	109.172	111.066	107.665	114.67	107.082	105.103	105.097		-7.11682	94.6467	4.79404	2	111.65	0.98974	7	108.32	1.31052	7
	-7.03547	98.0768	112.14	112.083	113.936	112.425	106.856	114.095	108.873	89.582	108.395	110.243	105.759	114.6	106.201	105.126	105.957		-7.03547	93.8294	4.24739	2	111.022	1.18408	7	108.505	1.31556	7
	-6.95408	98.9088	110.277	110.64	114.336	111.409	106.72	113.367	108.101	89.5883	110.59	110.275	106.245	113.641	106.728	104.242	105.965		-6.95408	94.2486	4.66025	2	110.858	0.999041	7	108.076	1.21415	7
	-6.8727	98.1927	110.782	111.783	113.592	112.224	105.854	112.517	109.318	88.8015	108.323	109.71	105.584	113.649	106.249	104.326	106.08		-6.8727	93.4971	4.69563	2	110.489	1.09909	7	108.081	1.24205	7
	-6.79132	99.7749	111.698	111.413	113.416	111.474	106.208	113.019	108.577	88.5119	109.492	109.783	104.3	114.716	106.209	104.539	105.98		-6.79132	94.1434	5.63152	2	110.688	1.27493	7	108.001	1.19588	7
	-6.70993	98.4655	110.83	111.98	112.889	111.522	106.856	112.226	108.655	88.1909	109.436	109.904	105.25	113.357	106.162	105.407	105.65		-6.70993	93.3282	5.13734	2	110.521	1.03762	7	108.068	1.06447	7
	-6.62857	98.1791	110.372	110.774	112.953	111.579	106.675	110.543	108.047	88.6882	108.427	110.485	104.923	113.257	105.659	103.412	104.89		-6.62857	93.4336	4.74547	2	110.17	1.07292	7	107.258	1.12733	7
	-6.54717	100	110.309	110.482	113.464	109.853	105.975	112.566	107.4	88.9148	109.74	109.734	105.591	111.668	106.162	104.082	106.364		-6.54717	94.4574	5.54261	2	110.141	0.906938	7	107.486	1.07233	7
	-6.46577	97.7358	110.277	110.182	112.849	110.619	106.329	111.749	107.782	87.3977	107.834	109.63	104.695	110.486	104.936	105.149	104.537		-6.46577	92.5668	5.16904	2	109.422	0.964776	7	107.3	1.08928	7
	-6.3844	96.1399	110.94	109.023	112.945	109.708	105.613	111.158	107.361	87.8698	108.627	109.113	105.447	111.468	105.942	104.928	105.696		-6.3844	92.0049	4.13506	2	109.652	0.915732	7	107.201	0.893198	7
	-6.30302	95.4239	109.961	111.121	112.769	110.006	105.319	110.324	106.456	87.8006	107.866	108.015	103.464	112.159	105.18	104.349	105.328		-6.30302	91.6122	3.81164	2	109.337	1.21218	7	106.709	0.922709	7
	-6.22163	97.5994	110.459	109.875	110.514	109.063	105.123	110.883	107.485	87.618	108.243	108.895	104.801	111.054	105.494	103.641	104.998		-6.22163	92.6087	4.99069	2	109.12	0.80942	7	106.67	0.974551	7
	-6.14023	96.1672	109.646	108.889	111.937	108.821	106.811	111.87	107.883	86.8438	106.937	108.596	104.429	111.315	104.763	103.359	104.522		-6.14023	91.5055	4.66173	2	108.821	0.969843	7	106.861	1.11396	7
	-6.05885	96.8356	109.354	109.827	112.697	111.095	107.037	110.413	107.86	87.4732	107.466	109.718	103.738	110.862	105.816	103.298	104.545		-6.05885	92.1544	4.68116	2	109.094	1.07397	7	107.152	1.09256	7
	-5.97747	96.2559	109.559	109.457	112.097	109.402	105.229	111.619	108.951	86.6297	107.49	109.024	104.346	110.164	105.494	104.882	105.689		-5.97747	91.4428	4.81307	2	108.876	0.91686	7	107.324	0.997502	7
	-5.8961	97.0197	109.78	108.203	111.705	111.103	105.522	110.947	107.002	86.9948	107.666	109.266	103.89	111.023	106.013	103.907	105.512		-5.8961	92.0073	5.01243	2	108.79	0.979743	7	107.144	1.06021	7
	-5.8147	96.1945	110.317	109.985	112.025	109.595	106.283	110.802	108.023	87.3033	107.938	109.323	103.958	112.106	105.313	104.684	104.598		-5.8147	91.7489	4.4456	2	109.379	1.05952	7	107.043	0.934951	7
	-5.73332	94.9328	110.103	109.938	110.794	109.466	106.306	110.794	106.971	86.7619	107.642	108.758	104.125	109.634	105.227	104.044	104.13		-5.73332	90.8474	4.08544	2	108.713	0.856473	7	106.705	0.981579	7
	-5.65193	96.0649	108.564	108.897	111.114	108.934	107.707	110.502	107.064	87.2089	107.257	109.226	104.444	110.916	106.987	104.105	105.051		-5.65193	91.6369	4.42804	2	108.631	0.862292	7	107.193	0.822727	7
	-5.57055	95.4852	109.425	110.182	110.354	108.87	105.485	109.936	106.799	86.4409	106.44	109.089	104.566	110.187	106.327	103.473	103.785		-5.57055	90.9631	4.52217	2	108.606	0.844529	7	106.382	0.912996	7
	-5.48917	94.6873	109.03	108.991	111.026	109.95	107.459	111.749	106.729	85.931	105.415	109.032	104.118	110.417	105.863	103.359	103.347		-5.48917	90.3092	4.37815	2	108.29	0.966991	7	106.922	1.1891	7
	-5.40778	95.3488	109.559	109.165	111.074	109.394	106.728	110.705	106.363	86.8375	107.377	109.056	103.411	109.434	104.967	103.602	104.399		-5.40778	91.0932	4.25568	2	108.44	0.932246	7	106.594	0.990683	7
	-5.3264	94.3872	109.093	107.95	112.201	108.757	106.118	111.376	107.057	84.7098	106.048	107.87	104.361	109.565	106.791	104.067	104.483		-5.3264	89.5485	4.83871	2	108.155	0.953689	7	106.95	0.950964	7
	-5.24502	94.3463	109.551	107.461	111.058	108.249	106.366	112.137	105.341	85.3456	106.168	108.935	104.467	108.951	105.698	103.61	103.862		-5.24502	89.846	4.50036	2	108.084	0.839675	7	106.466	1.11421	7
	-5.16362	95.0556	109.456	108.415	111.338	109.023	106.69	109.774	106.706	85.7862	106.408	108.265	102.788	108.851	104.747	103.747	103.961		-5.16362	90.4209	4.63467	2	107.932	1.02228	7	106.378	0.90179	7
	-5.08225	93.6302	108.122	108.226	110.13	108.063	106.065	109.491	106.183	85.4085	106.657	109.153	103.806	110.325	104.354	103.892	104.046		-5.08225	89.5194	4.11085	2	108.06	0.855059	7	106.013	0.808473	7
	-3.27473	87.7447	111.248	107.863	106.82	107.668	106.607	107.557	106.441	85.27	109.084	109.823	101.527	106.978	105.486	106.283	105.604		-3.27473	86.5074	1.23731	2	107.62	1.17912	7	106.521	0.322621	7
	-3.19347	90.8068	111.737	108.187	105.493	106.588	106.562	108.698	106.542	85.8555	107.994	111.082	101.307	108.697	107.27	105.963	105.819		-3.19347	88.3311	2.47566	2	107.785	1.3341	7	106.778	0.3668	7
	-3.11208	88.754	111.666	107.516	106.62	107.096	106.962	107.59	105.77	85.6414	107.738	109.468	100.896	108.198	106.461	106.778	103.854		-3.11208	87.1977	1.55628	2	107.443	1.25484	7	106.359	0.468766	7
	-3.0307	87.5469	110.869	107.848	106.085	107.039	107.014	107.978	105.591	86.2772	107.618	107.7	99.5974	106.594	105.714	105.628	104.583		-3.0307	86.9121	0.63483	2	106.616	1.3032	7	106.221	0.43845	7
	-2.94932	86.7421	111.658	108.147	106.133	106.805	106.404	108.196	106.238	85.5533	107.313	108.144	101.808	106.617	105.463	106.451	104.314		-2.94932	86.1477	0.59441	2	107.117	1.11466	7	106.267	0.450559	7
	-2.86793	87.7856	110.538	106.475	105.477	107.289	105.688	107.226	105.879	85.5722	107.081	107.563	101.109	107.193	104.645	105.209	103.639		-2.86793	86.6789	1.10669	2	106.491	1.07301	7	105.654	0.499313	7
	-2.78655	87.8197	109.946	106.562	104.981	106.596	106.781	107.161	105.326	84.2881	107.265	108.903	100.57	106.579	106.508	105.697	106.487		-2.78655	86.0539	1.76581	2	106.401	1.15106	7	106.365	0.240116	7
	-2.70517	88.5562	110.214	107.863	107.1	106.346	105.997	106.489	105.38	85.7359	108.235	108.451	101.459	106.394	107.514	107.555	105.858		-2.70517	87.1461	1.41018	2	107.102	1.04329	7	106.448	0.311173	7
	-2.62377	88.1198	110.269	107.879	105.821	107.249	105.892	108.714	105.583	84.9049	107.618	108.152	102.575	106.801	105.51	106.07	106.479		-2.62377	86.5124	1.6074	2	107.017	0.902058	7	106.5	0.432078	7
	-2.54238	88.1675	111.185	107.248	106.348	107.958	106.012	107.258	106.589	85.3897	107.546	108.734	101.421	106.709	105.25	106.161	104.453		-2.54238	86.7786	1.38892	2	107.027	1.11815	7	106.24	0.445693	7
	-2.461	88.1743	110.285	107.508	106.189	107.015	107.519	107.622	106.246	85.0623	107.474	109.605	101.413	107.27	105.958	106.314	105.589		-2.461	86.6183	1.556	2	107.106	1.09029	7	106.609	0.296941	7
	-2.37962	87.8401	110.419	107.548	107.492	106.717	106.223	107.201	106.667	84.7539	107.506	106.901	100.41	104.99	104.912	105.369	105.243		-2.37962	86.297	1.54313	2	106.466	1.17486	7	106.048	0.330511	7
	-2.29823	88.3653	111.358	107.09	108.107	106.072	107.496	108.285	105.458	84.7224	107.674	108.257	100.714	106.256	105.4	105.819	104.545		-2.29823	86.5438	1.82143	2	107.065	1.21793	7	106.154	0.490561	7
	-2.21685	89.2587	110.751	106.807	106.652	107.015	106.638	108.245	105.692	85.5344	108.467	107.773	101.36	105.573	105.07	104.227	104.046		-2.21685	87.3966	1.86213	2	106.769	1.09597	7	105.847	0.582209	7
	-2.13547	88.263	110.159	108.013	105.501	106.362	105.183	107.298	104.522	85.3519	105.375	108.015	99.6885	104.729	105.423	105.758	103.862		-2.13547	86.8074	1.45555	2	105.926	1.26737	7	105.487	0.430627	7
	-2.05408	88.6994	109.59	106.152	105.549	106.676	106.185	106.327	105.31	85.2386	106.969	106.99	100.319	105.834	104.386	104.516	103.992		-2.05408	86.969	1.73044	2	105.915	1.06105	7	105.342	0.404802	7
	-1.9727	89.0063	110.009	107.95	105.933	107.168	106.472	106.95	104.85	84.5713	106.176	107.321	100.289	105.665	105.879	105.613	105.289		-1.9727	86.7888	2.21751	2	106.192	1.13523	7	106.032	0.326435	7
	-1.8913	88.488	108.667	106.846	106.117	106.781	105.862	107.493	105.77	84.9868	106.48	107.418	100.646	104.959	104.567	105.438	104.399		-1.8913	86.7374	1.75063	2	105.876	0.972565	7	105.758	0.420758	7
	-1.80992	89.3746	109.125	108.203	105.717	106.257	105.922	106.077	105.731	84.1873	106.52	107.168	100.934	106.026	104.205	104.577	105.113		-1.80992	86.781	2.59364	2	106.242	0.994991	7	105.412	0.299223	7
	-1.72855	88.5835	108.493	106.625	105.733	106.628	106.705	106.028	105.942	83.199	106.849	107.224	100.015	105.373	104.692	104.364	104.368		-1.72855	85.8913	2.69224	2	105.759	1.03165	7	105.532	0.390819	7
	0	100	100	100	100	100	100	100	100	100	100	100	100	100	100	100	100		0	100	0	2	100	0	7	100	0	7
	0.0812833	103.662	98.4924	97.5866	97.4974	98.6051	98.1541	97.9529	98.6745	98.3696	99.6636	97.9014	95.3202	97.7508	98.3652	97.6314	97.6585		0.0812833	101.016	2.64634	2	97.7446	0.493528	7	98.1488	0.160193	7
	0.162667	101.862	97.0321	96.6243	95.7784	96.2587	96.7679	96.367	96.1248	98.3256	96.8279	97.3444	94.948	96.1925	97.0054	96.9002	95.747		0.162667	100.094	1.76812	2	96.3925	0.311008	7	96.453	0.172909	7
	0.24405	101.841	94.9483	94.4633	94.1393	94.6944	94.9371	95.7278	96.538	98.2374	95.2579	94.705	93.8768	95.4556	95.1191	95.4379	95.1482		0.24405	100.039	1.80198	2	94.6923	0.217759	7	95.3718	0.231603	7
	0.325433	101.159	94.4037	94.3292	93.5396	93.2995	93.4001	93.9315	93.3801	98.1493	94.8654	93.6718	90.9063	93.406	94.2073	93.7014	93.5207		0.325433	99.6544	1.50504	2	93.5889	0.489907	7	93.6344	0.125897	7
	0.406817	101.241	92.3277	92.5152	92.5242	92.6302	92.1645	92.4994	93.1852	98.3507	93.1913	92.3238	89.0678	92.3006	91.7787	91.8203	92.3154		0.406817	99.796	1.44522	2	92.0358	0.508278	7	92.3419	0.1852	7
	0.4882	101.596	90.607	91.198	89.6698	90.6709	90.4769	91.0591	91.5166	97.5387	91.4531	91.331	88.5588	90.8191	92.2267	90.7083	91.801		0.4882	99.5673	2.0286	2	90.5195	0.398035	7	91.2085	0.247822	7
	0.5696	101.112	89.3125	89.5181	89.214	90.3886	89.4824	90.784	90.0897	95.4362	91.0285	91.0808	88.1942	89.9747	90.0338	90.7464	90.5266		0.5696	98.2739	2.83769	2	89.7604	0.390615	7	90.2931	0.174301	7
	0.650967	100.164	88.2943	89.4077	90.7012	89.4211	89.603	88.7046	90.0741	97.0855	89.9952	90.2091	86.2569	87.7792	89.46	87.2658	89.4519		0.650967	98.6246	1.53911	2	88.9491	0.597757	7	89.1401	0.347361	7
	0.732367	101.487	87.4891	89.2973	87.2152	87.8407	88.729	87.6284	88.5848	97.8472	88.6815	88.6997	85.596	88.8846	88.2103	88.85	88.2543		0.732367	99.6669	1.81977	2	87.9805	0.489726	7	88.2996	0.171804	7
	0.813533	101.637	87.6707	87.1283	87.0313	86.8811	87.3879	87.1106	86.3392	96.8274	86.687	87.158	83.993	86.7352	88.5011	87.4105	86.9569		0.813533	99.2321	2.4047	2	86.6291	0.456152	7	87.2268	0.252481	7
	0.894867	101.685	86.6525	85.9137	86.0638	86.099	86.0017	85.8969	86.9708	96.5127	85.5896	87.2871	82.2913	84.8699	85.3729	86.8545	86.6958		0.894867	99.0986	2.58593	2	85.524	0.611554	7	86.2702	0.221424	7
	0.97625	100.812	85.2948	85.7244	84.2568	84.0026	85.6024	84.0926	85.0838	96.777	84.2999	86.1006	81.3568	84.3863	85.2393	86.1843	85.2065		0.97625	98.7943	2.01728	2	84.4885	0.591275	7	85.0588	0.295461	7
	1.05763	100.375	84.2055	84.1786	84.1209	83.2769	84.638	83.8175	84.5458	95.7887	83.4588	83.5096	80.4984	83.1734	84.532	85.3237	83.5867		1.05763	98.0819	2.29318	2	83.3065	0.492799	7	84.2458	0.269226	7
	1.13903	100.443	84.2292	85.0383	81.7782	83.3495	82.9277	82.2558	83.5712	95.8643	83.1224	83.3078	79.7539	83.0659	82.3391	82.4981	83.7095		1.13903	98.1538	2.28951	2	82.8994	0.649887	7	82.9501	0.227932	7
	1.2204	100.205	81.9638	81.3629	82.098	81.5514	82.212	80.7751	82.9162	95.9524	80.9997	81.5078	78.1661	82.091	81.561	83.2521	82.7959		1.2204	98.0785	2.12609	2	81.1699	0.524261	7	82.152	0.338705	7
	1.3018	101.705	81.4903	81.142	80.1151	79.721	80.9011	80.589	81.0058	96.3679	79.8302	81.6773	77.771	80.2871	80.1069	80.8682	81.5292		1.3018	99.0364	2.66857	2	80.3304	0.50396	7	80.6745	0.227193	7
	1.38317	100.498	79.8169	80.6215	79.2516	79.463	80.0271	79.6747	80.7875	95.6062	79.3656	81.3221	76.7758	78.6213	79.5724	81.2643	80.7155		1.38317	98.052	2.44585	2	79.3964	0.553695	7	80.2149	0.266586	7
	1.46455	101.671	77.9856	79.0599	77.9004	78.6647	78.671	77.7571	79.3138	94.555	78.2842	80.1517	75.7274	78.5906	79.1166	80.4417	80.1704		1.46455	98.1129	3.55797	2	78.2428	0.510483	7	79.1622	0.349894	7
	1.54595	101.35	77.3147	77.7506	77.1968	77.3504	77.91	77.3606	78.5653	94.3409	77.8837	78.7069	75.2716	76.7176	77.1516	78.5758	79.1647		1.54595	97.8456	3.50468	2	77.2631	0.407611	7	78.0112	0.291361	7
	1.62733	100.402	77.0227	76.9461	77.7325	76.3587	77.8874	77.2474	77.5361	94.6809	76.8984	78.2791	74.5043	77.3624	77.521	78.2331	78.4892		1.62733	97.5416	2.86077	2	76.9636	0.450847	7	77.6104	0.264975	7
	1.7087	100.941	75.7755	76.3152	75.3658	76.2941	76.3053	76.0418	76.9747	94.706	75.1041	77.0442	73.3723	76.8788	75.9648	76.7936	77.1841		1.7087	97.8236	3.11754	2	75.6937	0.474717	7	76.5083	0.179664	7
	1.79008	99.2703	75.3809	75.3293	75.4298	75.3749	75.582	75.1922	77.6452	94.6242	75.1522	77.2217	72.6354	74.7217	74.7465	76.6794	77.5986		1.79008	96.9472	2.32303	2	75.1244	0.510782	7	76.117	0.447676	7
	1.8715	99.7545	74.2126	74.2014	73.6627	73.9155	75.0772	74.6662	75.0409	94.5235	74.9519	75.6881	71.4351	75.2437	74.9194	75.7807	76.0479		1.8715	97.139	2.6155	2	74.1994	0.530113	7	75.064	0.266392	7
	1.95287	99.8704	73.6601	74.091	73.6068	73.6091	74.1957	73.6548	74.9474	93.3904	73.7664	74.8567	71.2679	74.3302	73.937	75.1637	75.0192		1.95287	96.6304	3.24001	2	73.6542	0.431028	7	74.361	0.253199	7
	2.03425	100.02	72.5156	73.3654	72.8952	72.5367	73.8868	73.7681	74.2378	94.1961	72.637	73.7751	70.8577	73.9234	72.6715	74.3945	75.2418		2.03425	97.1083	2.91217	2	72.8528	0.390423	7	73.8196	0.361848	7
	2.11563	99.9386	71.2685	72.8922	71.432	71.69	72.3951	72.1013	73.3645	93.4345	72.2204	73.3312	69.0192	73.0176	72.2393	73.3663	73.8369		2.11563	96.6865	3.25208	2	71.883	0.562713	7	72.7134	0.303185	7
	2.19702	98.5133	71.2763	72.6871	71.432	72.5609	72.3273	71.2274	72.6628	93.7303	71.2832	72.3464	68.2899	72.2039	71.6969	72.6885	73.4761		2.19702	96.1218	2.39147	2	71.3598	0.553991	7	72.3771	0.276328	7
	2.2784	99.6317	71.1737	71.1018	70.8323	71.0934	72.0787	71.3569	71.2281	93.3212	70.7786	72.8872	67.6669	71.0908	71.5397	73.2826	72.5779		2.2784	96.4764	3.15529	2	70.7902	0.587342	7	71.8796	0.305775	7
	2.3598	99.4067	70.3528	70.3526	68.9694	70.0129	70.5492	70.8391	71.5166	93.3149	69.4809	71.7249	66.93	70.3385	71.2882	72.2011	72.9004		2.3598	96.3608	3.0459	2	69.7356	0.569162	7	71.3296	0.373104	7
	2.44118	99.9523	68.6716	69.8399	69.617	69.255	69.6451	69.9814	71.1735	92.8553	69.4569	71.8218	67.1731	71.014	70.0228	70.3275	71.6413		2.44118	96.4038	3.54846	2	69.6563	0.572039	7	70.2924	0.318546	7
	2.52257	98.752	67.8664	69.5244	68.5056	68.5857	68.9821	69.0428	70.425	91.9615	68.8161	70.7402	66.4742	69.8089	68.9067	70.6778	70.7585		2.52257	95.3567	3.39524	2	68.8194	0.527165	7	69.6255	0.357953	7
	2.60395	98.5678	67.456	68.0574	67.89	68.8195	69.05	68.6221	69.9883	92.1	68.3114	69.9249	65.5474	69.1333	68.6631	70.7388	70.3132		2.60395	95.3339	3.23393	2	68.0458	0.520962	7	69.4564	0.329424	7
	2.68532	99.2157	67.7165	68.1284	67.826	67.9326	68.4698	67.6106	69.575	93.1386	67.2781	69.0128	64.9776	68.4501	69.1425	69.5126	70.2288		2.68532	96.1772	3.03855	2	67.6271	0.488881	7	68.9246	0.359712	7
	2.76672	99.3998	66.1852	68.1994	67.1224	67.0537	68.5	67.2061	69.0214	92.3895	66.7895	68.7465	63.9976	67.2757	66.9182	68.949	68.7702		2.76672	95.8947	3.50516	2	66.9023	0.582189	7	68.0598	0.360492	7
	2.8481	97.879	65.8773	67.111	65.8671	66.457	67.8219	66.753	68.3041	93.0757	66.0445	67.3581	63.9292	66.8228	67.0046	67.7532	69.2538		2.8481	95.4773	2.40168	2	66.1443	0.434601	7	67.6211	0.367706	7
	2.92948	97.6608	65.5221	66.1172	65.995	66.1022	66.85	65.9762	67.3606	92.8176	65.62	67.1241	63.6937	67.03	66.4466	68.2026	68.3326		2.92948	95.2392	2.4216	2	65.8717	0.434107	7	67.0387	0.362676	7
	3.01087	99.0316	65.9484	66.409	65.5953	64.7799	67.0308	65.6202	67.1189	91.7663	65.8683	67.3662	62.4554	66.3468	65.7785	67.7761	67.941		3.01087	95.399	3.63262	2	65.7128	0.584009	7	66.5779	0.452	7
	3.09225	98.4587	65.0564	65.2181	64.8437	65.0701	66.511	64.9486	67.423	90.9984	65.2035	66.3815	62.6377	65.725	65.1026	67.182	67.5265		3.09225	94.7285	3.73017	2	65.0094	0.439982	7	66.252	0.445729	7
	3.17362	99.1543	64.2513	65.3127	63.3805	65.9813	65.2528	64.536	65.8558	91.7034	64.819	65.4532	62.2047	64.7808	64.9768	66.3214	66.0986		3.17362	95.4289	3.72547	2	64.3146	0.438961	7	65.5747	0.249589	7
	3.25502	97.2925	63.612	64.3584	63.6683	63.8042	64.3863	64.366	65.2554	91.5712	63.6174	65.0335	62.0451	64.7194	63.8529	65.8187	65.9604		3.25502	94.4318	2.86065	2	63.8649	0.372085	7	64.7777	0.339336	7
	3.33642	98.6224	63.7462	63.3883	64.4359	63.9977	63.7912	64.0829	65.0448	91.5712	62.9606	64.6138	60.746	64.1053	63.7978	65.3237	65.945		3.33642	95.0968	3.5256	2	63.428	0.497492	7	64.569	0.32557	7
	3.4178	97.6744	63.8093	63.2936	61.5176	63.4898	64.2884	63.0472	64.3587	92.3958	62.0554	64.1779	59.88	63.1765	63.8214	65.3922	65.5305		3.4178	95.0351	2.6393	2	62.5586	0.569471	7	64.2755	0.350561	7
	3.49917	98.6156	62.0412	61.8424	61.5735	62.9092	63.2186	63.4922	64.5692	91.7097	61.8792	63.3304	60.5637	63.1227	62.9097	63.9604	64.2484		3.49917	95.1626	3.45294	2	62.0505	0.355186	7	63.6154	0.248753	7
	3.58057	98.1041	62.1438	63.3488	60.8219	62.0061	62.8569	62.9582	63.3918	91.6216	61.3425	63.4676	59.5305	62.2016	62.5088	63.7243	64.0028		3.58057	94.8628	3.24126	2	61.8367	0.529293	7	63.0641	0.263045	7
	3.66175	97.1834	61.6308	61.5033	61.4696	62.3287	62.6686	62.1652	63.3294	90.9984	61.3425	63.2254	59.3862	61.8254	61.4321	63.7928	63.4807		3.66175	94.0909	3.09252	2	61.4833	0.425168	7	62.7425	0.316978	7
	3.74307	97.9677	60.6993	62.3551	60.71	60.9015	62.8494	61.5341	62.9318	91.8482	60.5175	61.7483	58.748	61.5184	60.9369	62.9703	63.4347		3.74307	94.9079	3.05975	2	60.8995	0.438425	7	62.2227	0.402268	7
	3.82445	97.313	60.0363	60.2571	60.1503	60.5306	61.5535	61.6312	62.347	92.3329	60.2051	61.6434	57.8288	60.7354	61.4399	62.7647	62.928		3.82445	94.8229	2.49004	2	60.1223	0.435976	7	61.885	0.319298	7
	3.90585	98.2132	59.5548	60.1625	59.7026	60.5306	61.5309	60.3366	61.0526	90.1171	60.5014	61.6111	58.0111	60.5665	60.4889	62.0335	62.6516		3.90585	94.1651	4.04805	2	60.0157	0.420746	7	61.2321	0.331851	7
	3.98723	98.0563	59.6495	59.6814	59.3987	59.3453	60.2803	59.9159	60.9201	91.3635	58.9475	60.1663	57.2134	60.2134	60.5832	62.1249	61.7074		3.98723	94.7099	3.34644	2	59.3243	0.388408	7	60.6967	0.369474	7
	4.06862	97.2857	58.8365	59.2318	59.2628	59.9581	60.1673	59.6407	60.6316	91.6845	59.4681	60.3277	56.9323	59.6761	60.4339	61.3709	60.7477		4.06862	94.4851	2.80059	2	59.105	0.401978	7	60.4215	0.214979	7
	4.15	98.2541	58.6629	59.1924	58.2154	58.5712	59.6399	59.1876	60.2495	91.011	59.3159	60.9896	55.7776	59.2308	59.5143	61.1272	60.3716		4.15	94.6325	3.62158	2	58.7692	0.595401	7	59.8087	0.319294	7
	4.23138	97.9199	57.8183	58.7665	58.4952	59.1517	59.007	59.9887	59.8908	90.8095	58.6431	59.9322	55.9827	58.6781	59.0898	60.4798	60.2641		4.23138	94.3647	3.5552	2	58.3309	0.457108	7	59.696	0.22882	7
	4.31277	97.4016	57.4236	58.4668	58.4393	58.4341	59.007	58.5889	59.961	91.4579	57.794	59.6335	56.1498	58.4709	58.579	60.0076	59.5117		4.31277	94.4298	2.97186	2	58.054	0.41053	7	59.1556	0.253442	7
	4.39415	98.4519	57.3368	58.3248	56.8562	57.5391	58.2913	57.6665	59.4542	90.6144	56.6725	58.5035	54.3569	58.4248	57.4	59.8934	59.673		4.39415	94.5331	3.91875	2	57.2108	0.555534	7	58.5596	0.410418	7
	4.47553	98.22	56.2317	57.473	56.7042	57.1763	58.6228	57.7717	59.5478	91.0739	56.7046	57.7851	53.7567	57.8798	58.1702	59.0404	59.8265		4.47553	94.647	3.57306	2	56.6479	0.53519	7	58.5937	0.361695	7
	4.55692	98.07	55.9634	57.891	55.7128	56.4506	57.8995	57.9173	58.6199	90.1171	56.7927	57.2847	53.3541	57.4806	57.3057	59.3831	58.2067		4.55692	94.0935	3.97645	2	56.3542	0.582552	7	57.969	0.352978	7
	4.6383	98.3632	56.6106	57.0313	56.0966	56.507	57.4474	56.7198	57.9571	89.7835	55.479	57.7609	53.9391	56.7821	57.0542	58.2711	58.6289		4.6383	94.0733	4.28988	2	56.2428	0.469662	7	57.5122	0.303678	7
	4.71968	97.6267	56.3265	56.0454	55.7848	56.1361	57.3646	55.3524	57.3411	90.5955	55.0625	56.6551	52.7311	56.1296	56.3232	57.8979	58.0454		4.71968	94.1111	3.51559	2	55.5336	0.503379	7	56.923	0.378785	7
	4.80107	97.7153	55.324	56.2189	55.1611	56.0393	56.9954	55.32	57.0604	90.8788	55.0064	56.8488	52.9742	56.0068	54.8534	57.6847	58.3525		4.80107	94.297	3.41829	2	55.3629	0.468795	7	56.6151	0.478537	7
	4.88245	97.5517	55.2056	56.148	55.4809	55.9023	56.5735	55.4737	57.8869	90.4507	54.4217	56.1627	53.0426	55.5615	55.435	57.4791	57.7077		4.88245	94.0012	3.55048	2	55.1461	0.416188	7	56.6369	0.401173	7
	4.96367	98.1382	55.032	55.3277	54.6974	55.1685	56.1742	55.8055	56.2417	90.6584	54.4617	56.1304	52.5336	54.9858	55.1521	56.8241	56.6943		4.96367	94.3983	3.73986	2	54.7384	0.418948	7	56.0086	0.253431	7
	5.04497	97.9063	54.5584	55.17	54.0817	54.6283	55.0215	55.6518	56.0624	89.3743	54.1974	55.1296	52.0778	54.9167	54.5705	56.1615	56.6866		5.04497	93.6403	4.266	2	54.3045	0.404979	7	55.5403	0.309625	7
	5.12635	96.5764	54.4321	54.6494	54.2896	54.0155	54.9311	55.0287	55.961	89.9282	54.4697	55.9448	51.3181	54.6634	54.429	57.1135	55.9957		5.12635	93.2523	3.32409	2	54.2524	0.531883	7	55.3535	0.40261	7
	5.20773	97.8449	52.7903	53.7424	53.1302	53.822	54.9311	54.3571	55.3294	89.7583	53.6927	54.9681	52.0474	54.625	53.6823	55.9482	54.8365		5.20773	93.8016	4.04332	2	53.5709	0.385208	7	54.7009	0.306688	7
	5.28912	97.9268	53.2402	53.908	53.2982	54.4025	54.5544	53.5966	55.4308	89.2547	53.2922	54.2175	51.0978	53.819	54.2011	55.7273	55.3585		5.28912	93.5907	4.33603	2	53.2675	0.388123	7	54.753	0.291942	7
	5.3705	96.6719	52.956	54.1525	52.5706	54.4267	54.5544	53.6289	55.0409	89.4813	52.6274	54.169	50.8927	54.0953	53.2815	54.8591	55.3739		5.3705	93.0766	3.5953	2	53.0662	0.453299	7	54.4522	0.285405	7
	5.4519	96.6037	52.8613	52.8985	53.0263	53.6526	53.5674	53.5561	54.2534	90.5514	52.0907	54.3789	50.1709	53.7422	53.1871	54.9962	54.468		5.4519	93.5776	3.02614	2	52.7384	0.507888	7	53.9544	0.24037	7
	5.53328	97.2925	52.0246	52.7013	52.7145	52.1609	53.7708	53.103	53.809	90.4381	51.8183	53.3296	49.8974	52.8364	52.912	54.3488	54.2377		5.53328	93.8653	3.42719	2	52.1889	0.42746	7	53.4775	0.297861	7
	5.61445	96.2627	52.6482	52.5199	51.779	52.9028	54.0797	53.0625	53.7856	89.5128	51.546	52.8776	49.7911	53.4736	52.5112	53.7243	54.445		5.61445	92.8877	3.37496	2	52.0908	0.455353	7	53.5016	0.262163	7
	5.69578	99.3248	52.5851	52.1256	50.7156	51.9674	53.2962	52.6175	53.848	89.8464	52.0346	53.4103	49.5404	52.5754	52.2204	53.7319	53.7387		5.69578	94.5856	4.73921	2	51.8553	0.493579	7	53.06	0.296132	7
	5.77697	96.7947	51.3458	51.4709	51.779	52.548	52.8291	52.4719	53.3957	89.6576	51.562	53.9511	49.2137	52.5908	52.2597	53.5263	53.6466		5.77697	93.2261	3.56854	2	51.7019	0.539967	7	52.9539	0.212536	7
	5.85828	98.636	50.7222	51.4867	51.0114	51.6449	51.8873	51.9945	53.575	90.4696	51.8504	52.8211	48.7503	52.0611	51.6938	53.1683	52.971		5.85828	94.5528	4.08321	2	51.2433	0.491022	7	52.4193	0.300424	7
	5.93967	98.6224	50.0039	51.0766	50.2279	50.7257	52.0982	51.5818	52.8655	89.0595	50.4966	52.1511	48.8187	51.5545	50.8449	52.4296	52.5795		5.93967	93.841	4.78141	2	50.6185	0.414593	7	51.875	0.320068	7
	6.02085	99.2771	50.9432	51.2028	50.6436	51.8707	52.264	51.9055	51.9766	90.3374	49.7837	51.5942	47.8538	51.3088	50.3105	52.3077	52.9326		6.02085	94.8072	4.46985	2	50.4757	0.489741	7	51.9382	0.304261	7
	6.10218	98.0154	50.6828	50.9188	50.5317	50.4032	51.3674	51.3877	52.5224	90.3185	50.016	51.7475	46.9194	51.5928	50.8371	52.262	52.0728		6.10218	94.167	3.84844	2	50.3442	0.614224	7	51.5504	0.293137	7
	6.18357	96.9174	48.9699	50.2879	49.6042	51.0563	51.3373	50.7727	52.2261	89.1099	49.9359	51.0049	48.1501	51.2244	50.5777	52.559	51.5507		6.18357	93.0137	3.90375	2	49.8825	0.412282	7	51.44	0.277279	7
	6.26497	96.4946	49.9724	50.138	49.3724	50.2983	50.7496	50.9265	51.2904	89.8779	48.9426	51.3439	47.9374	50.3186	49.776	51.2414	51.259		6.26497	93.1862	3.30835	2	49.7179	0.412213	7	50.7916	0.216266	7
	6.34615	97.5107	49.1278	50.3273	49.5083	49.4114	50.7722	50.7565	51.501	89.8905	49.5915	50.5852	47.5575	50.3877	49.5952	51.2643	51.5738		6.34615	93.7006	3.81013	2	49.5836	0.394039	7	50.6963	0.331405	7
	6.42747	97.7972	49.3172	49.9172	49.0925	49.7178	50.7421	49.8908	51.1111	89.9345	49.0067	50.4722	47.4512	50.7408	49.6581	51.2643	51.1132		6.42747	93.8659	3.93133	2	49.4283	0.415849	7	50.4996	0.270976	7
	6.50885	97.2857	48.5358	49.578	48.7487	49.105	50.1168	49.8503	50.6667	88.7448	48.414	50.0525	46.6079	49.7812	49.5638	51.1653	50.783		6.50885	93.0152	4.27044	2	48.8169	0.440819	7	50.1787	0.276859	7
	6.59023	98.0563	48.6384	49.4992	48.4449	49.6452	50.8777	49.0897	50.8226	89.6072	48.9026	48.9305	46.5775	49.7428	49.1394	50.7997	50.6218		6.59023	93.8318	4.22457	2	48.6766	0.390064	7	50.1423	0.309635	7
	6.67162	96.6651	47.9754	48.7499	48.229	48.5647	50.0188	49.7775	50.4327	88.9525	47.8773	48.987	46.6003	49.6891	49.5402	50.2285	49.9002		6.67162	92.8088	3.85627	2	48.3011	0.371035	7	49.7804	0.230582	7
	6.753	96.4809	47.8964	48.3161	48.4289	48.9195	49.5969	48.8955	50.2612	89.5631	47.5168	48.9951	46.2585	48.6989	48.2905	50.198	50.1689		6.753	93.022	3.4589	2	48.0158	0.346338	7	49.4758	0.29619	7
	6.83438	95.9217	47.2018	48.8288	48.0931	48.1293	49.3408	48.7742	49.8168	89.4498	48.0215	48.3009	45.9318	48.8063	48.2826	49.4669	49.3014		6.83438	92.6858	3.23594	2	47.8835	0.38595	7	49.016	0.239738	7
	6.91557	96.6719	47.6991	48.6	47.8132	48.0648	48.949	48.758	49.0604	89.6009	47.9253	49.1888	45.6051	48.1462	48.3612	49.2993	49.5701		6.91557	93.1364	3.5355	2	47.854	0.422912	7	48.8661	0.197395	7
	6.9969	96.5219	47.6517	47.488	47.3575	47.3714	48.5497	48.5557	49.4893	89.7079	46.6517	48.7449	45.6279	47.985	47.8661	48.85	48.9175		6.9969	93.1149	3.40697	2	47.3581	0.375173	7	48.5142	0.265262	7
	7.07828	96.4537	46.7046	47.5353	47.4454	47.4117	48.5346	48.0621	48.6628	90.6144	46.7318	47.9538	45.5139	47.8545	47.5595	48.2254	49.1632		7.07828	93.534	2.91964	2	47.1056	0.324196	7	48.2313	0.233924	7
	7.15967	96.6651	46.6335	47.5984	46.7978	46.9844	48.5196	47.9731	48.6706	89.796	46.3794	47.9054	44.8606	47.6625	47.0801	48.3549	49.263		7.15967	93.2306	3.43452	2	46.8339	0.395246	7	48.1208	0.31687	7
	7.24105	95.6626	46.3888	47.0936	46.2061	46.5006	47.9093	47.8599	48.5848	89.4309	46.083	47.8085	44.6023	47.4092	46.8286	48.1188	48.1959		7.24105	92.5468	3.1158	2	46.5131	0.40131	7	47.714	0.287445	7
	7.32243	96.9788	46.2862	47.0778	46.8138	46.9682	47.7812	47.2611	47.7427	89.9282	46.2592	47.3242	44.9138	47.6088	47.0094	47.9893	48.2957		7.32243	93.4535	3.52528	2	46.612	0.340631	7	47.5782	0.192003	7
	7.40382	96.9311	46.1205	46.2497	46.406	47.3472	48.1052	47.3987	48.0156	89.7457	46.1631	48.1072	44.1313	46.5879	46.9386	47.2125	47.6048		7.40382	93.3384	3.59268	2	46.2522	0.43918	7	47.5175	0.159787	7
	7.4852	97.3607	46.7993	46.6519	45.6864	46.1055	47.073	46.7675	48.1715	89.5443	45.4502	47.4615	43.9869	46.941	46.4513	47.4638	47.4743		7.4852	93.4525	3.90822	2	46.1396	0.447262	7	47.0724	0.264416	7
	7.56658	95.6421	45.9705	46.4232	46.0942	46.2667	47.1031	46.7514	48.6862	90.3752	45.6264	46.6866	43.7742	46.7798	46.75	46.9307	47.6355		7.56658	93.0086	2.63346	2	45.9078	0.387375	7	47.1605	0.298573	7
	7.64797	95.5671	45.8047	45.9973	45.4705	46.041	46.9675	46.0798	46.9318	90.5514	45.1378	46.3395	44.1161	46.5648	45.9247	46.9383	47.5357		7.64797	93.0593	2.50782	2	45.633	0.312529	7	46.6313	0.232353	7
	7.72917	97.7222	45.0391	45.7292	45.0548	44.8395	46.5984	45.9827	47.306	89.2988	45.1858	46.8561	43.2348	46.0659	45.7518	46.8621	47.267		7.72917	93.5105	4.21171	2	45.3094	0.425321	7	46.3725	0.339804	7
	7.81048	96.5423	45.0785	45.7134	44.9348	45.9039	46.1991	46.1364	46.7992	90.18	44.3928	45.2256	43.5311	45.659	45.3195	46.9992	46.4072		7.81048	93.3612	3.18114	2	44.9336	0.288675	7	46.2521	0.212065	7
	7.89187	96.4537	44.6286	45.0351	44.5111	45.1056	46.1388	46.2254	46.6589	88.7511	45.0897	46.1377	43.0677	46.135	45.0916	46.1081	46.4532		7.89187	92.6024	3.85128	2	44.9435	0.398815	7	45.9688	0.236021	7
	7.97325	96.6242	44.4234	45.2717	44.4551	44.9766	46.0484	45.5862	46.5497	89.4121	43.6559	45.7503	42.817	45.3443	45.1702	46.6641	46.2536		7.97325	93.0181	3.60605	2	44.5311	0.390899	7	45.8927	0.250546	7
	8.05463	97.8654	44.2182	44.9562	44.0713	44.6138	46.3573	45.4325	45.8402	88.8896	44.4169	45.718	42.4295	45.2291	44.5807	46.3976	45.5243		8.05463	93.3775	4.48789	2	44.4342	0.400887	7	45.5352	0.279595	7
	8.13602	95.9763	44.1077	44.5382	44.0633	44.5654	45.3251	45.1007	46.3938	89.4247	44.1605	45.1772	42.6878	45.4518	45.1623	45.8416	45.8391		8.13602	92.7005	3.27581	2	44.3124	0.340278	7	45.4611	0.228735	7
	8.21767	95.3011	44.1787	44.6171	44.3192	44.6218	45.7319	45.3758	45.7232	89.1603	44.1205	45.2821	42.2244	44.7302	44.2663	45.7426	45.6088		8.21767	92.2307	3.07042	2	44.2103	0.363487	7	45.2958	0.228399	7
	8.29905	96.0376	43.8235	44.696	43.8634	44.1219	45.2648	44.502	45.076	89.4058	43.8081	45.4435	42.0573	44.4078	44.1563	45.2932	45.3478		8.29905	92.7217	3.31594	2	44.0142	0.396227	7	44.8231	0.206723	7
	8.38043	95.8262	43.342	44.5382	43.4876	44.3799	45.1744	44.6476	46.0897	88.5811	43.9603	44.596	41.8142	44.5459	43.8104	45.4912	45.5397		8.38043	92.2037	3.62254	2	43.7549	0.377878	7	45.019	0.295667	7
	8.46182	96.4332	42.9316	43.7732	43.8394	43.7833	44.5868	44.7528	45.653	90.3815	43.3755	44.2005	41.5483	44.4154	43.944	45.674	45.0023		8.46182	93.4073	3.02587	2	43.4406	0.366504	7	44.7709	0.282029	7
	8.54298	95.6148	43.4052	44.4278	43.0159	43.7671	44.6169	44.2026	44.7641	88.8078	43.2634	44.1279	41.4723	44.0623	43.5825	45.2171	44.5187		8.54298	92.2113	3.40353	2	43.3964	0.375022	7	44.3813	0.216391	7
	8.62432	95.3761	43.2394	43.0712	43.0959	43.0253	44.3683	44.0651	44.8421	89.0721	42.7027	44.4346	41.5103	43.8397	43.1816	44.8134	43.8124		8.62432	92.2241	3.15199	2	43.1277	0.346007	7	44.0155	0.274463	7
	8.7057	97.1902	43.1684	43.2921	42.4242	43.751	44.1046	44.2188	44.1092	88.4238	42.3262	44.4992	40.158	43.7246	43.0637	44.6839	43.8201		8.7057	92.807	4.38322	2	42.7989	0.522483	7	43.9645	0.18902	7
	8.78708	96.174	42.9	42.8346	42.6161	43.5736	44.9032	43.5391	44.6394	87.7943	42.8949	43.135	40.7354	43.1488	42.9616	44.5164	43.7663		8.78708	91.9842	4.18988	2	42.6093	0.319819	7	43.9857	0.268014	7
	8.86848	95.8058	42.5527	42.9923	42.7041	42.9447	44.1799	43.6929	44.0468	88.6126	42.3502	43.5386	40.8645	43.4559	43.0323	44.3717	43.6512		8.86848	92.2092	3.59658	2	42.6369	0.339652	7	43.7028	0.20819	7
	8.94987	95.7717	42.1343	42.8583	41.7366	42.6222	43.5923	43.1265	43.7505	88.493	42.174	44.1763	40.1656	43.3408	43.1581	43.5491	43.774		8.94987	92.1323	3.63933	2	42.3694	0.482993	7	43.3675	0.158333	7
	9.03125	96.4946	42.2685	42.6217	41.6327	42.8318	43.3888	42.5196	43.306	89.3995	41.8456	42.9332	40.6822	44.1007	42.5922	44.1508	43.6051		9.03125	92.947	3.54756	2	42.2978	0.408744	7	43.1992	0.222699	7
	9.11263	95.6148	42.3948	42.2983	41.6887	42.4045	43.8333	43.0698	43.7193	88.9211	41.6613	42.909	40.4923	43.287	42.4035	43.7471	43.5514		9.11263	92.2679	3.34687	2	42.1045	0.349694	7	43.247	0.237165	7
	9.19403	95.1101	41.7555	42.3298	41.7926	42.5093	43.7053	42.7947	43.1579	87.9391	41.7494	43.127	40.3631	42.7804	41.987	43.511	43.252		9.19403	91.5246	3.58554	2	41.9854	0.339161	7	42.9882	0.226528	7
	9.27542	96.9038	41.6213	42.0301	41.7846	42.0335	42.8162	43.1103	43.4854	88.8203	41.6613	42.8283	40.0517	42.5808	42.0734	42.9094	42.8144		9.27542	92.8621	4.04171	2	41.794	0.339042	7	42.7489	0.199738	7
	9.35678	95.1579	41.3766	42.0853	41.4488	41.5578	42.5601	42.6167	43.9142	88.109	41.1807	42.3279	39.649	42.4426	42.0341	42.8332	42.753		9.35678	91.6335	3.52442	2	41.5016	0.360635	7	42.6099	0.276568	7
	9.43817	96.515	41.8502	42.0144	41.2809	41.5175	42.545	42.4953	42.963	88.0713	41.2288	42.4651	39.6718	42.1279	41.6961	43.1074	42.254		9.43817	92.2931	4.22189	2	41.5199	0.350983	7	42.3683	0.225514	7
	9.51957	95.8467	40.8083	41.3124	41.5607	41.4852	41.9272	42.463	42.846	89.4372	41.0285	42.2068	39.4135	42.1586	41.6647	43.1074	42.8451		9.51957	92.642	3.20472	2	41.2127	0.360178	7	42.3341	0.242602	7
	9.60095	95.6285	40.3031	41.3124	40.7932	41.8562	42.8313	42.2364	42.5653	89.5443	40.7482	41.8597	39.4287	42.2047	41.6333	42.163	42.5994		9.60095	92.5863	3.0421	2	40.95	0.356278	7	42.2693	0.16184	7
	9.68233	95.3352	40.9977	41.3045	40.7212	41.0498	42.0854	42.2364	42.23	89.4121	40.66	41.214	38.9881	41.3065	41.6961	42.2163	42.0083		9.68233	92.3736	2.96157	2	40.7417	0.308864	7	41.9318	0.163703	7
	9.76372	96.0786	40.4373	41.7383	41.113	40.8241	42.2437	42.0099	42.2534	88.0587	40.4598	41.6095	39.1248	41.5291	41.2324	42.559	41.563		9.76372	92.0686	4.00995	2	40.8588	0.351683	7	41.8122	0.236659	7
	9.8451	95.9694	40.382	41.0285	40.6013	40.8402	42.4621	41.6539	42.4639	88.6252	39.859	41.1898	38.7754	41.5522	40.9495	42.2925	41.9162		9.8451	92.2973	3.67212	2	40.484	0.354217	7	41.7969	0.258254	7
	9.92648	96.1877	40.0821	41.1783	40.7372	40.5902	41.5807	41.2655	41.6764	89.0218	40.0032	41.5611	37.7725	41.7287	40.8551	41.866	41.5477		9.92648	92.6047	3.58295	2	40.4376	0.511422	7	41.3402	0.175502	7
	10.0079	96.856	40.8004	40.5552	40.5133	40.6386	41.3094	41.0227	42.0585	89.2106	39.827	41.4561	38.2284	41.2605	40.3757	41.6679	41.2713		10.0079	93.0333	3.8227	2	40.3773	0.410973	7	41.192	0.218143	7
	10.0893	95.1579	39.5611	40.4764	40.3614	40.6628	41.7163	41.3707	41.7076	88.386	39.4585	40.9395	38.3575	40.3086	40.6272	41.4166	41.4479		10.0892	91.7719	3.38594	2	39.9233	0.326522	7	41.2784	0.171498	7
	10.1706	95.9558	40.2794	40.9733	40.0016	40.6144	40.7444	40.7234	41.5984	87.5236	39.5707	41.2301	37.8409	40.7538	40.7608	41.508	40.9719		10.1706	91.7397	4.2161	2	40.0928	0.433491	7	40.9888	0.151489	7
	10.252	95.6898	39.7269	40.2871	39.6258	40.1387	41.2039	40.5696	41.1618	88.493	39.867	40.883	37.9929	40.5466	40.0613	41.3404	41.0103		10.252	92.0914	3.59841	2	39.847	0.353824	7	40.7837	0.19908	7
	10.3334	94.9533	39.2217	40.3108	40.1055	40.4048	40.9177	40.7719	41.1618	89.0407	39.2743	40.3503	37.9093	40.8383	40.0299	41.3024	40.4268		10.3334	91.997	2.95631	2	39.7157	0.373877	7	40.7165	0.171658	7
	10.4148	95.0692	39.498	40.3738	39.8337	40.2032	41.0533	40.3431	41.0526	88.1846	39.7789	40.0678	38.0688	40.1013	39.6919	41.3633	40.9412		10.4148	91.6269	3.44232	2	39.6746	0.287499	7	40.6641	0.225131	7
	10.4962	95.2806	39.3243	40.1215	38.8902	39.5339	40.5485	39.8171	40.7719	88.5245	39.058	39.9225	38.1904	39.9862	39.7705	41.508	40.8798		10.4962	91.9026	3.37807	2	39.3562	0.265896	7	40.4043	0.271861	7
	10.5776	96.6719	39.1665	39.1671	39.5059	39.6065	40.3677	40.1651	40.6628	87.6936	38.4492	40.2212	37.8865	39.871	39.3618	40.8987	40.5497		10.5776	92.1827	4.48916	2	39.1811	0.303758	7	40.2303	0.212823	7
	10.6589	95.5671	39.1823	39.6561	39.1141	40.3483	40.5937	39.7605	40.2105	88.7133	38.4092	39.8176	37.9017	40.3623	39.4718	40.3275	40.6034		10.6589	92.1402	3.42687	2	39.2062	0.318437	7	40.188	0.160245	7
	10.7403	95.6353	38.7718	39.5694	39.1141	39.5501	39.9458	40.1165	40.3665	88.9903	38.8978	39.5431	37.3167	40.3316	39.4011	39.9924	39.5363		10.7403	92.3128	3.32248	2	39.0778	0.353856	7	39.8441	0.13424	7
	10.8217	96.3104	38.7718	39.0567	38.5704	39.292	39.7122	39.631	40.3665	88.9903	38.1048	39.4624	36.8609	39.871	39.0238	40.3123	40.304		10.8217	92.6504	3.66006	2	38.6712	0.372654	7	39.806	0.203177	7
	10.9031	95.9899	38.5508	39.1671	38.5224	39.2437	39.8855	39.2993	40.2183	88.1783	38.1769	39.9467	36.4203	39.7405	39.2753	40.1066	39.9202		10.9031	92.0841	3.90582	2	38.6464	0.446142	7	39.707	0.15929	7
	10.9845	95.5739	38.4561	38.8122	38.3065	39.0663	39.8779	39.1779	39.9532	89.0784	38.2169	39.3494	36.5722	39.1571	38.843	39.3755	39.4519		10.9845	92.3262	3.24773	2	38.4101	0.346069	7	39.3923	0.154938	7
	11.0659	96.0035	38.1482	38.6702	38.1227	38.8808	39.4636	39.453	40.1481	88.5623	38.0247	39.0669	36.6102	39.0343	38.8509	39.5887	39.4672		11.0659	92.2829	3.72065	2	38.2396	0.317153	7	39.4075	0.16743	7
	11.1473	94.5714	38.3614	38.3942	38.1386	38.5664	39.8779	39.3236	40	89.1225	37.9285	38.5423	36.5874	38.9192	39.0395	39.505	39.8741		11.1472	91.8469	2.72444	2	38.1245	0.281836	7	39.4552	0.19722	7
	11.2286	94.4145	37.6746	38.9305	38.0587	38.1955	39.0793	39.5582	39.6725	87.9265	37.9285	38.518	36.4962	39.0497	38.678	39.8705	39.2062		11.2286	91.1705	3.24402	2	38.0938	0.329148	7	39.18	0.223321	7
	11.31	94.9806	38.1167	38.6071	37.9388	38.3487	39.3355	39.0646	39.3216	88.0335	37.6402	38.5019	36.8685	38.9268	38.5051	38.888	38.8531		11.31	91.507	3.47354	2	38.0857	0.260735	7	38.9024	0.142829	7
	11.3914	94.2713	37.8562	38.4888	37.6989	38.6309	39.4033	39.0323	39.1111	88.0209	37.6963	38.8086	36.2911	38.9959	38.0335	39.4897	39.0066		11.3914	91.1461	3.1252	2	37.9765	0.345196	7	38.9582	0.187343	7
	11.4728	94.8851	38.093	37.8973	37.435	38.5583	39.2225	38.4821	38.9084	87.4166	37.3999	38.4858	36.1316	38.5046	38.3322	39.0327	38.9222		11.4728	91.1508	3.73425	2	37.7067	0.311606	7	38.7798	0.122944	7
	11.5542	95.4989	37.651	37.6765	37.443	38.2358	38.8985	38.9999	39.1579	87.5425	37.2637	38.8248	35.8885	38.3434	38.0099	39.4593	38.7916		11.5542	91.5207	3.97819	2	37.5844	0.349371	7	38.7933	0.192399	7
	11.6356	95.458	37.6825	37.9289	37.1312	38.1793	38.7252	38.8462	38.9942	87.7691	37.0715	38.3162	36.0328	38.0287	37.6641	39.0327	38.5767		11.6356	91.6135	3.84443	2	37.456	0.293653	7	38.5741	0.186935	7
	11.7169	95.3284	37.4142	37.9762	37.419	38.1874	38.778	38.7976	38.9084	88.002	37.2557	37.9288	35.4251	38.3358	37.5305	39.1318	38.4155		11.7169	91.6652	3.66318	2	37.3935	0.358859	7	38.5356	0.205158	7
	11.7983	95.342	36.9642	37.219	37.443	38.0423	38.7026	38.2232	38.4094	87.3914	37.3037	37.501	35.9796	37.7524	37.782	38.888	38.2389		11.7983	91.3667	3.97531	2	37.1662	0.218367	7	38.3266	0.143039	7
	11.8797	94.8305	37.1695	38.1655	36.9953	37.9213	38.4841	38.0937	38.2066	87.2655	36.4066	37.7916	35.3187	38.1362	37.2475	38.5834	38.2005		11.8797	91.048	3.78251	2	37.1405	0.38869	7	38.1053	0.166279	7
	11.9611	95.9558	36.8616	37.2742	36.7074	37.0747	38.1978	38.3122	38.1365	87.2655	36.3826	37.3799	35.1744	37.6526	37.5933	38.1493	38.0009		11.9611	91.6107	4.34514	2	36.7761	0.312952	7	37.9235	0.166058	7
	12.0425	94.8305	37.1063	37.3531	37.1232	37.2198	38.1376	38.118	38.0195	86.7116	36.1262	37.4203	35.068	37.476	36.6266	38.4158	38.2773		12.0425	90.7711	4.05948	2	36.8105	0.338027	7	37.8306	0.247717	7
	12.1239	95.3898	36.909	37.1007	37.0353	37.2117	38.0622	37.851	38.0195	87.6243	36.8952	37.5898	35.3947	37.7524	37.3025	37.9208	38.3234		12.1239	91.507	3.88272	2	36.9539	0.288953	7	37.813	0.154332	7
	12.2053	95.0692	36.6406	37.2821	36.6195	36.8408	38.1225	37.3331	38.0741	86.7871	36.6389	37.3234	35.0148	37.1536	37.0982	38.1569	37.8858		12.2052	90.9282	4.14105	2	36.6676	0.299981	7	37.6445	0.205582	7
	12.2866	95.608	37.059	36.4067	36.4036	36.8247	37.5499	37.6244	37.6296	87.6873	35.9901	37.1862	35.0832	37.1613	36.7995	37.8065	38.0009		12.2866	91.6476	3.96036	2	36.47	0.288662	7	37.4622	0.177039	7
	12.368	95.5875	36.246	36.73	36.5315	36.8005	37.8588	37.503	38.0819	88.3293	36.1663	37.3638	34.7261	37.3225	36.5244	37.3953	37.832		12.368	91.9584	3.62909	2	36.4409	0.337165	7	37.428	0.217852	7
	12.4494	94.6259	35.9776	36.7143	36.2197	36.6634	37.3616	37.77	37.5283	87.9328	35.4614	36.9683	34.8477	36.9617	36.8702	37.6923	37.8934		12.4494	91.2793	3.34658	2	36.1644	0.302772	7	37.397	0.176399	7
	12.5308	94.4213	36.688	37.0849	36.6515	36.2845	37.3239	37.1794	37.4737	87.6495	35.7578	36.936	34.7641	36.9003	36.4144	37.4791	37.4328		12.5308	91.0354	3.38591	2	36.3975	0.317784	7	37.084	0.194196	7
	12.6122	95.5807	35.8829	36.5486	36.2837	36.6393	36.7814	37.5435	37.9025	87.1522	35.4854	36.8633	34.6578	37.0078	36.5165	37.3724	37.1257		12.6122	91.3665	4.21425	2	36.1042	0.314208	7	37.1259	0.19304	7
	12.6936	95.3147	35.3935	36.2095	35.652	36.5747	37.5122	37.4059	37.4113	87.1585	35.2371	36.7019	34.9009	37.0615	36.0135	37.3953	36.9722		12.6936	91.2366	4.07812	2	35.8795	0.3024	7	37.0408	0.212453	7
	12.775	96.1468	35.4014	36.2253	35.9079	36.6393	37.2184	36.88	37.5595	87.8069	35.7898	36.379	34.6198	36.2094	36.3515	37.1439	36.9952		12.775	91.9768	4.16995	2	35.7904	0.231285	7	36.9697	0.149611	7
	12.8563	94.6396	35.6461	35.8782	35.4202	36.22	36.5855	36.8072	36.8031	87.7691	35.133	36.5163	34.6122	36.7775	36.045	37.0906	36.2583		12.8563	91.2043	3.43524	2	35.7119	0.28636	7	36.5442	0.144143	7
	12.9375	93.9167	35.3777	36.4855	35.5561	36.4861	37.1732	36.7263	36.8499	87.2592	35.5175	36.5405	34.4602	35.7949	35.5105	36.984	36.4425		12.9375	90.5879	3.32872	2	35.6761	0.268301	7	36.5961	0.205817	7
	13.0188	95.1715	36.017	36.1148	35.5641	35.7765	36.5177	36.5402	37.037	87.297	35.1169	36.3306	33.579	36.3399	35.9506	36.7251	36.3811		13.0188	91.2343	3.93727	2	35.5803	0.372787	7	36.4183	0.164295	7
	13.1002	94.6941	36.0644	35.9177	35.692	35.8813	36.2993	36.3055	36.4756	87.0452	34.9167	36.4759	33.7917	36.2248	35.6441	36.9078	36.3427		13.1002	90.8697	3.82447	2	35.5833	0.352459	7	36.2652	0.15424	7
	13.1816	93.7393	34.9041	36.1858	35.1723	35.9055	36.8869	36.4916	36.5224	86.7367	35.3012	35.7817	33.9512	36.0866	35.7934	36.7479	36.1661		13.1816	90.238	3.50129	2	35.3404	0.293431	7	36.3591	0.157129	7
	13.263	94.7555	34.841	35.7757	35.2443	35.8329	36.676	36.4674	36.694	87.127	34.6443	35.927	33.7613	36.0482	35.4083	36.6641	36.4502		13.263	90.9413	3.81424	2	35.1774	0.311882	7	36.3133	0.18846	7
	13.3444	94.5373	35.2356	35.4918	34.8365	35.3895	36.5479	36.4593	35.9142	87.9705	34.7164	35.6365	33.8753	35.8409	35.5419	36.4661	35.9896		13.3444	91.2539	3.28336	2	35.0904	0.254697	7	36.0441	0.176259	7
	13.4258	94.5714	35.0856	35.3971	35.0044	35.0669	36.4801	36.4754	36.0312	87.3222	34.4841	35.5154	33.1611	35.7412	35.204	35.9787	35.9665		13.4258	90.9468	3.6246	2	34.9127	0.330014	7	35.8861	0.211152	7
	13.5072	95.2261	35.0067	35.4602	35.2283	35.3653	35.9527	36.2327	35.6413	87.4921	34.6123	35.5073	33.5562	35.5876	35.3926	36.131	36.1892		13.5071	91.3591	3.86698	2	34.9941	0.271736	7	35.8435	0.141289	7
	13.5885	93.7393	34.9593	35.2946	34.3248	35.2766	35.8623	35.8605	35.9922	86.913	34.404	35.2329	33.3814	35.4495	35.0232	36.2757	35.8207		13.5885	90.3262	3.41316	2	34.7209	0.27733	7	35.7302	0.162896	7
	13.6699	94.5441	34.8567	35.5075	34.9884	35.2443	35.6287	35.4479	35.6257	87.2026	34.2599	34.9665	32.9712	35.4264	35.031	35.8873	35.5059		13.6699	90.8733	3.67076	2	34.711	0.328784	7	35.4816	0.105562	7
	13.7513	95.2738	34.7383	34.9949	34.6286	35.3733	36.254	35.6825	35.6491	86.9193	33.627	35.0876	32.8117	35.7104	35.031	35.476	35.5289		13.7513	91.0966	4.17726	2	34.5141	0.369678	7	35.5707	0.140281	7
	13.8327	94.435	34.4463	34.5847	34.5646	35.5749	35.9376	35.8524	36.0234	86.4472	34.2518	34.8212	33.1611	35.4264	35.3533	35.7273	35.3984		13.8327	90.4411	3.99389	2	34.4652	0.259181	7	35.6953	0.0990027	7
	13.9141	94.3054	34.1542	34.7267	34.2928	34.7363	35.7191	35.1727	35.6491	86.4472	34.1397	34.9988	32.9484	35.4495	34.5359	35.6283	35.7669		13.9141	90.3763	3.9291	2	34.3872	0.301276	7	35.3155	0.191454	7
	13.9954	95.417	34.3042	35.2157	34.6046	34.7283	35.5006	35.634	35.6179	87.6558	34.2919	34.8777	32.8345	35.1117	34.7953	35.2399	34.6384		13.9954	91.5364	3.88062	2	34.4629	0.304179	7	35.1649	0.165332	7
	14.0766	93.9917	34.3674	34.5847	34.2048	34.696	35.2445	35.3508	35.2827	87.5362	33.9715	34.8051	33.465	34.7739	34.4416	35.2247	34.5386		14.0766	90.7639	3.22774	2	34.3103	0.181183	7	34.9684	0.148269	7
	14.158	93.8826	34.32	34.8687	34.2368	34.4138	35.1239	35.286	35.7193	85.6414	33.9074	34.9342	32.7433	35.2499	34.3865	35.6436	34.8841		14.158	89.762	4.12056	2	34.3229	0.316456	7	35.0653	0.203087	7
	14.2393	95.7717	34.2332	34.8687	34.2768	34.3896	35.0486	35.5369	35.3138	87.1333	33.6991	35.1844	32.9028	34.321	34.2372	35.4075	35.3217		14.2393	91.4525	4.31918	2	34.2123	0.283279	7	35.0365	0.195404	7
	14.3207	93.4938	34.0122	34.498	34.1649	34.2364	35.1842	35.286	35.1657	86.8501	33.627	34.7889	32.6065	34.3287	33.9385	35.2551	34.9839		14.3207	90.1719	3.32188	2	34.0037	0.271086	7	34.8643	0.206407	7
	14.4019	94.5646	33.9648	34.4743	33.6292	34.3735	35.3198	35.2051	34.9474	85.8492	33.1144	34.4661	32.3255	34.9198	34.6145	35.2551	34.5309		14.4019	90.2069	4.35769	2	33.842	0.339488	7	34.8923	0.145752	7
	14.4832	93.8348	33.8622	34.3876	33.6452	34.0671	34.9054	34.9705	34.6589	85.3708	33.3627	34.4418	32.371	34.559	33.9621	35.4912	34.7996		14.4832	89.6028	4.23203	2	33.8042	0.292532	7	34.6936	0.201056	7
	14.5646	94.9055	33.5859	34.2141	33.4293	34.1235	34.7322	34.9624	34.5107	87.1019	33.2666	34.1997	32.9484	34.2519	33.97	34.8591	34.3774		14.5646	91.0037	3.90184	2	33.6994	0.198662	7	34.505	0.140938	7
	14.646	95.2329	33.2307	33.8986	33.5412	33.4543	34.6794	34.7277	34.4717	86.913	33.2185	34.0221	32.2875	34.7202	34.1193	34.9048	34.6922		14.646	91.073	4.15994	2	33.5598	0.289456	7	34.4356	0.188673	7
	14.7274	93.7803	33.4517	33.6935	33.5412	33.9381	34.5212	34.5174	34.8226	85.931	32.7379	34.0463	32.1887	34.1829	33.8285	34.6306	34.9148		14.7274	89.8556	3.92462	2	33.406	0.269245	7	34.4533	0.157764	7
	14.8088	95.1306	33.1676	33.9932	33.3973	34.059	34.2048	34.4364	34.7446	86.7305	32.5056	34.1674	32.6141	34.1138	33.7499	34.7753	34.6		14.8088	90.9305	4.20008	2	33.4227	0.263592	7	34.3672	0.143961	7
	14.8902	94.4009	33.7201	33.8355	33.6452	33.8413	34.687	34.3555	34.0741	86.2898	33.1064	33.8284	31.9	34.275	33.2233	34.3107	33.5176		14.8902	90.3453	4.05553	2	33.4729	0.292779	7	34.0014	0.192819	7
	14.9716	93.5143	32.9466	33.8355	32.9495	33.3656	34.5137	34.4526	34.308	86.3591	33.0183	34.1593	32.1963	33.8451	33.4041	34.6382	34.2392		14.9716	89.9367	3.57762	2	33.2787	0.26115	7	34.1316	0.199074	7
	15.0529	94.2236	32.6387	33.4806	33.5892	33.5833	33.8733	33.9995	34.0663	87.0578	32.7139	33.7073	31.5885	33.8758	33.3648	33.8766	33.6251		15.0529	90.6407	3.58289	2	33.0849	0.308592	7	33.7698	0.0954402	7
	15.1343	94.7623	33.0571	33.3623	33.0295	33.1963	34.5363	34.218	34.23	86.1765	32.6979	33.6347	31.7481	34.275	33.9307	34.0366	34.1624		15.1343	90.4694	4.29291	2	33.1149	0.298005	7	34.0443	0.158325	7
	15.2157	94.0258	32.6387	33.662	33.4932	33.422	34.2274	34.5093	33.9493	86.7745	32.5697	34.1513	31.5582	33.254	33.687	34.5621	33.5636		15.2157	90.4001	3.62563	2	33.0467	0.325529	7	33.9887	0.172589	7
	15.2971	94.9533	33.1913	33.6698	32.4938	32.8899	34.2424	33.8701	33.9337	86.529	32.5376	33.4087	31.5582	33.3461	33.6949	34.1203	33.3564		15.2971	90.7412	4.21213	2	32.8865	0.277353	7	33.7297	0.177466	7
	15.3785	94.169	32.4335	33.3938	33.0695	33.3333	34.1445	33.8701	33.9727	86.3087	32.3374	33.6992	31.3986	33.4152	32.5788	34.3641	33.2796		15.3785	90.2388	3.93015	2	32.821	0.305562	7	33.649	0.233602	7
	15.4599	94.3941	32.3704	33.2597	32.4138	33.1156	33.4514	34.2503	33.8168	86.1199	32.1131	33.0132	31.4746	33.7299	33.0975	34.0061	33.5329		15.4599	90.257	4.1371	2	32.625	0.287409	7	33.6101	0.165313	7
	15.5412	92.805	32.7492	33.2045	32.6457	33.4059	33.9712	33.9591	33.9415	86.1639	32.3855	32.8194	31.0112	33.277	32.6653	33.7319	33.6865		15.5412	89.4845	3.32055	2	32.5847	0.287232	7	33.623	0.177009	7
	15.6226	93.3097	31.7705	33.1966	32.3179	32.9624	33.4815	33.2632	34.0663	86.1891	32.2573	33.788	31.034	33.1465	32.7674	33.4425	32.9648		15.6226	89.7494	3.56029	2	32.5015	0.356434	7	33.2783	0.165358	7
	15.704	94.2713	32.2914	32.9994	32.214	33.2366	33.474	33.7163	33.4971	86.485	32.1612	32.7064	31.3226	33.3461	33.3412	33.7167	33.2259		15.704	90.3781	3.89317	2	32.4345	0.249008	7	33.4582	0.0774583	7
	15.7854	93.0505	32.4651	32.6445	32.078	32.8173	33.5267	33.7406	33.5517	85.9058	31.9289	32.6499	31.2391	33.5841	32.4766	33.671	33.2489		15.7854	89.4782	3.57235	2	32.3699	0.275836	7	33.2904	0.179908	7
	15.8668	94.1008	32.1257	32.6445	32.5977	32.527	33.3459	33.4493	33.3255	86.4787	32.4575	32.658	30.5022	32.9086	32.9325	33.3435	33.0723		15.8668	90.2897	3.81107	2	32.2706	0.308114	7	33.1423	0.123178	7
	15.9482	93.6029	32.5914	32.7865	32.3179	32.7286	33.8582	33.1014	33.4581	86.529	32.025	32.9163	30.882	32.8165	32.4373	33.1226	32.8267		15.9482	90.066	3.53696	2	32.3336	0.269339	7	33.0761	0.17938	7
	16.0296	94.6259	32.3467	32.5735	32.6217	32.8495	33.4664	32.98	33.3099	86.0884	31.9369	32.7145	31.0492	32.5938	32.681	33.4425	32.7729		16.0296	90.3572	4.26877	2	32.2623	0.224945	7	33.0718	0.124382	7
	16.111	93.3643	31.8099	32.8102	32.4458	32.5593	33.3007	33.247	32.9903	84.1747	31.8087	32.5046	30.9504	32.8088	32.3037	32.7647	32.819		16.1109	88.7695	4.59475	2	32.1626	0.25603	7	32.8549	0.13553	7
	16.1923	93.5961	31.5889	32.6445	32.102	32.6076	32.9767	32.8829	33.2242	86.8249	31.224	32.7549	30.4034	32.7858	31.9736	32.8789	32.6501		16.1923	90.2105	3.38563	2	31.9291	0.341501	7	32.742	0.149852	7
	17.6146	84.2665	14.7762	14.9223	16.5347	12.4496	14.6387	17.8979	15.2047	81.7135	15.8523	15.1263	15.855	13.9556	15.5231	15.8873	14.3636		17.6146	82.99	1.27653	2	15.2889	0.32335	7	15.1378	0.625026	7
	17.696	87.6219	15.013	15.1984	17.3023	12.3528	14.7291	18.3186	15.4776	82.2422	15.9404	14.7873	15.7867	13.5948	16.1204	15.6512	14.3559		17.696	84.9321	2.68984	2	15.3747	0.433157	7	15.2865	0.687329	7
	17.7774	88.5017	15.5734	15.4429	17.7421	12.2964	14.6387	18.7556	15.7739	81.0588	15.6681	14.8842	16.0906	13.3415	16.1204	15.9787	14.3482		17.7774	84.7802	3.72144	2	15.5347	0.498626	7	15.416	0.749122	7
	17.8588	88.4812	15.163	15.6006	17.838	12.2561	15.5956	18.8041	15.8129	80.8196	15.612	14.9568	16.1589	13.0421	16.0811	16.3747	14.7628		17.8588	84.6504	3.83081	2	15.4816	0.542711	7	15.6696	0.739885	7
	17.9402	87.8811	14.7052	15.1353	18.0699	12.1513	15.3921	19.0792	15.9454	81.8331	15.9564	15.32	16.2349	13.1957	16.2383	16.489	14.9317		17.9402	84.8571	3.024	2	15.5168	0.56606	7	15.7467	0.781556	7
	18.0215	87.6696	14.4131	15.4034	17.9899	12.2642	15.8969	19.2815	15.8596	81.2539	16.0285	15.207	16.4476	12.9807	16.5055	17.0069	15.208		18.0216	84.4618	3.20785	2	15.4958	0.597616	7	16.0032	0.796593	7
	18.1029	87.1786	14.2553	15.2536	18.2058	12.2319	15.7463	19.411	16.0624	80.4167	15.9564	15.1748	16.2957	12.8656	16.5527	16.8621	15.3232		18.1029	83.7977	3.38095	2	15.4296	0.632155	7	16.0271	0.807748	7
	18.1843	86.408	14.1211	15.0485	18.6296	12.0868	15.9271	19.3058	16.0546	79.995	15.8843	15.4169	16.6148	13.3415	16.5999	16.9612	15.5151		18.1843	83.2015	3.2065	2	15.5795	0.653043	7	16.0643	0.812692	7
	18.2657	86.7558	14.0737	15.364	18.7975	12.0303	16.1079	19.8641	16.1871	81.4743	16.1567	15.2555	16.5996	13.4567	16.5134	17.3039	15.5689		18.2657	84.115	2.64077	2	15.6719	0.665375	7	16.2251	0.880084	7
	18.3471	86.8922	14.0737	15.0564	18.7015	11.861	15.9497	19.5566	16.2885	81.1847	16.0365	15.4734	16.554	13.0038	16.8592	17.4486	15.5996		18.3471	84.0384	2.85374	2	15.557	0.691595	7	16.2233	0.879861	7
	18.4285	88.072	13.8685	15.2299	19.0373	11.9255	16.123	19.9773	16.3119	81.5687	15.9885	15.6429	16.8655	13.0191	16.8357	17.6542	15.7838		18.4285	84.8204	3.25167	2	15.6645	0.745404	7	16.3731	0.913399	7
	18.5099	87.8674	13.9001	15.2378	19.1573	11.9739	16.1154	20.4143	16.2651	79.7369	16.3089	15.7075	17.0782	13.0345	16.9771	17.7228	16.0909		18.5099	83.8021	4.06527	2	15.7749	0.767526	7	16.5085	0.949938	7
	18.5913	86.6126	13.7975	15.2378	19.1013	11.8529	16.5675	20.4224	16.655	79.7558	16.1487	15.8366	16.8882	13.2724	17.1107	17.9132	16.1984		18.5912	83.1842	3.4284	2	15.7546	0.738503	7	16.6743	0.966796	7
	18.6726	87.2741	13.8606	15.1826	19.2212	11.8691	16.5298	20.3253	16.4288	80.1838	16.5732	15.7236	17.1693	13.3722	17.2758	17.936	16.2751		18.6726	83.7289	3.54514	2	15.8718	0.758822	7	16.6628	0.958835	7
	18.754	86.4421	13.7185	15.2615	19.8129	12.0384	16.6277	20.9402	16.6394	80.6496	16.4851	15.8528	17.3897	13.449	17.3623	18.195	16.444		18.754	83.5459	2.89622	2	15.9956	0.830725	7	16.8924	1.00236	7
	18.8354	86.483	13.6238	15.3798	19.8929	12.0626	16.6353	20.9888	16.4834	78.9311	16.5332	16.0788	17.496	13.5027	17.7867	18.4539	16.5592		18.8354	82.7071	3.77592	2	16.0724	0.843934	7	16.9957	1.01905	7
	18.9168	87.1923	13.6633	15.3876	20.0368	12.248	16.8914	20.8755	17.2476	79.3025	16.6533	16.0788	17.572	13.4336	17.771	18.6672	16.5131		18.9168	83.2474	3.94486	2	16.1179	0.866354	7	17.1734	0.988917	7
	18.9982	87.8129	13.8527	15.4902	19.9648	12.0948	16.899	21.369	16.9279	79.0444	16.9016	16.1999	17.4276	13.7407	17.6845	18.3244	16.5592		18.9982	83.4287	4.38421	2	16.2254	0.819852	7	17.1227	1.04056	7
	19.0795	85.4873	13.8132	15.6164	20.3406	12.3367	16.9894	21.3448	17.3177	79.4914	16.8135	16.5389	17.5492	13.9172	18.0618	18.7433	16.9123		19.0796	82.4893	2.99795	2	16.3699	0.852202	7	17.3866	1.02182	7
	19.1609	85.2349	13.7659	15.5612	20.4685	12.3287	17.3887	21.3205	17.4269	79.1011	16.7735	16.4178	17.9898	13.8635	17.9596	18.888	17.0889		19.1609	82.168	3.06692	2	16.4057	0.890373	7	17.4859	1.0196	7
	19.2423	85.4464	13.8448	15.8766	20.2207	12.2722	17.4565	21.5956	17.6764	78.7612	16.9417	16.5389	17.9594	13.9096	18.1954	19.0632	16.8893		19.2423	82.1038	3.3426	2	16.4702	0.849547	7	17.5927	1.06208	7
RAW DATA		Mn (uM)/Ca (mM)
		0/0	50/0	50/0	50/0	50/2	50/2	50/2	50/2	0/0	50/0	50/0	50/0	50/0	50/2	50/2	50/2
		16388	15978	15923	16185	15785	14831	15491	15773	16403	15771	15963	16350	17199	15130	14574	15725
		16150	16164	15990	15998	15771	14857	15173	15667	16224	15715	15740	16092	16877	15054	14700	15549
		16050	15714	15711	16083	15769	14639	15016	15560	16206	15657	15435	16198	16978	14969	14403	15640
		16014	15830	15833	15920	15798	14742	15127	15601	15949	15549	15331	15890	16858	14919	14444	15491
		15739	15731	15456	15867	15392	14450	14978	15523	15894	15351	15289	15812	16609	14748	14339	14980
		15885	15533	15403	15600	15347	14504	14838	15448	15979	15304	15166	15771	16608	14734	14398	14947
		15906	15462	15370	15660	15322	14438	14910	15344	15840	15405	15007	15650	16383	14594	14269	14780
		15659	15344	15208	15622	15232	14545	14774	15337	15611	15245	14897	15470	16312	14706	14166	14711
		15557	15324	15369	15405	15082	14412	14762	15079	15462	15211	14877	15399	16411	14515	14211	14556
		15325	15254	15148	15385	15212	14414	14886	15060	15398	14971	14835	15400	16212	14441	14154	14609
		15523	15259	15108	15205	15185	14463	14676	14916	15353	14829	14673	15139	16249	14367	14134	14475
		15355	15023	14916	15172	14992	14284	14488	14928	15332	14787	14603	15176	16032	14319	14090	14333
		15412	15001	14957	15154	14987	14413	14565	14869	15232	14762	14480	15119	15987	14225	14126	14397
		15085	14981	14941	15067	14784	14415	14609	14947	15163	14714	14600	15053	16069	14203	14252	14438
		15211	14829	14786	14943	14790	14381	14632	14938	15162	14748	14523	14965	16074	14233	14109	14276
		15008	14918	14796	14958	14677	14469	14568	14830	15086	14657	14462	15000	16032	14260	14234	14153
		15065	14857	14752	14970	14877	14316	14527	14620	15144	14533	14321	15035	15796	14000	14181	14390
		14923	14945	14830	14923	14659	14332	14473	14712	14837	14542	14435	14814	15826	14110	14186	14345
		15102	15177	14794	14789	14526	14400	14428	14644	14996	14441	14273	14756	15922	14119	14075	14229
		15126	14739	14799	14881	14668	14533	14458	14532	14890	14501	14207	14620	15861	13913	14125	14198
		14915	14723	14728	14768	14436	14417	14410	14531	14779	14296	14123	14736	15583	13929	14019	14182
		14978	14710	14607	14818	14411	14282	14355	14503	14832	14152	14114	14556	15565	13935	13972	14087
		14796	14680	14692	14760	14592	14453	14503	14531	14766	14155	14143	14571	15490	13886	14067	14040
		14797	14753	14664	14619	14455	14283	14317	14318	14709	14090	13954	14360	15203	13893	13974	14030
		14694	14677	14585	14433	14276	14313	14070	14441	14497	14000	13950	14351	15396	13775	13965	14027
		14784	14589	14542	14572	14077	14316	14212	14188	14565	14074	13911	14271	15179	13757	14033	13903
		14840	14532	14459	14486	14176	14231	14042	14351	14559	14017	13885	14338	15186	13646	13803	13915
		14976	14524	14402	14463	14138	14157	14145	14317	14639	13908	14015	14142	15151	13520	13884	13969
		14581	14420	14338	14444	14066	14153	14134	14172	14355	13837	13934	14092	15177	13849	13882	13836
		14582	14343	14198	14218	14016	14257	14060	14128	14670	13761	13898	14212	15128	13671	13846	13898
		14577	14262	14076	14336	14195	14345	13928	14099	14453	13724	13752	14184	15049	13728	13810	13862
		14691	14205	14318	14288	14116	14231	14083	14087	14310	13586	13736	14129	15010	13701	13753	13805
		14561	14262	14171	14492	13859	14204	13981	14005	14407	13658	13727	14000	14883	13568	13741	13782
		14581	14316	14141	14314	13839	14117	14120	13949	14274	13629	13760	14172	14938	13624	13800	13690
		14381	14207	14211	14250	13943	14183	14101	13963	14231	13532	13658	13921	14929	13512	13803	13802
		14503	13971	14028	14300	13817	14165	14011	13864	14232	13806	13662	13985	14804	13579	13687	13803
		14398	14035	14173	14207	13918	14050	13906	14020	14107	13523	13592	13898	14805	13518	13698	13818
		14630	14151	14126	14185	13825	14097	13968	13925	14061	13669	13601	13729	14944	13513	13726	13805
		14438	14041	14198	14119	13831	14183	13870	13935	14010	13662	13616	13854	14767	13507	13840	13762
		14396	13983	14045	14127	13838	14159	13662	13857	14089	13536	13688	13811	14754	13443	13578	13663
		14663	13975	14008	14191	13624	14066	13912	13774	14125	13700	13595	13899	14547	13507	13666	13855
		14331	13971	13970	14114	13719	14113	13811	13823	13884	13462	13582	13781	14393	13351	13806	13617
		14097	14055	13823	14126	13606	14018	13738	13769	13959	13561	13518	13880	14521	13479	13777	13768
		13992	13931	14089	14104	13643	13979	13635	13653	13948	13466	13382	13619	14611	13382	13701	13720
		14311	13994	13931	13822	13526	13953	13704	13785	13919	13513	13491	13795	14467	13422	13608	13677
		14101	13891	13806	14000	13496	14177	13826	13836	13796	13350	13454	13746	14501	13329	13571	13615
		14199	13854	13925	14095	13778	14207	13646	13833	13896	13416	13593	13655	14442	13463	13563	13618
		14114	13880	13878	14020	13568	13967	13795	13973	13762	13419	13507	13735	14351	13422	13771	13767
		14226	13908	13719	13971	13779	14006	13712	13723	13820	13441	13537	13675	14463	13488	13643	13744
		14105	13976	13945	14011	13592	14107	13694	13854	13869	13475	13544	13684	14604	13399	13745	13625
		13920	13949	13939	13857	13576	14110	13693	13719	13783	13438	13474	13706	14282	13388	13661	13564
		14086	13754	13807	13897	13510	14296	13657	13731	13854	13390	13532	13748	14449	13612	13669	13684
		14001	13863	13970	13802	13502	14001	13587	13697	13732	13288	13515	13764	14354	13528	13586	13519
		13884	13813	13819	13886	13636	14263	13811	13688	13651	13160	13508	13705	14384	13469	13571	13462
		13981	13880	13841	13892	13567	14166	13682	13641	13795	13405	13511	13612	14256	13355	13603	13599
		13840	13821	13687	14033	13488	14085	13765	13730	13457	13239	13364	13737	14273	13587	13664	13610
		13834	13879	13625	13890	13425	14118	13859	13510	13558	13254	13496	13751	14193	13448	13604	13529
		13938	13867	13746	13925	13521	14161	13567	13685	13628	13284	13413	13530	14180	13327	13622	13542
		13729	13698	13722	13774	13402	14078	13532	13618	13568	13315	13523	13664	14372	13277	13641	13553
		12866	14094	13676	13360	13353	14150	13293	13651	13546	13618	13606	13364	13936	13421	13955	13756
		13315	14156	13717	13194	13219	14144	13434	13664	13639	13482	13762	13335	14160	13648	13913	13784
		13014	14147	13632	13335	13282	14197	13297	13565	13605	13450	13562	13281	14095	13545	14020	13528
		12837	14046	13674	13268	13275	14204	13345	13542	13706	13435	13343	13110	13886	13450	13869	13623
		12719	14146	13712	13274	13246	14123	13372	13625	13591	13397	13398	13401	13889	13418	13977	13588
		12872	14004	13500	13192	13306	14028	13252	13579	13594	13368	13326	13309	13964	13314	13814	13500
		12877	13929	13511	13130	13220	14173	13244	13508	13390	13391	13492	13238	13884	13551	13878	13871
		12985	13963	13676	13395	13189	14069	13161	13515	13620	13512	13436	13355	13860	13679	14122	13789
		12921	13970	13678	13235	13301	14055	13436	13541	13488	13435	13399	13502	13913	13424	13927	13870
		12928	14086	13598	13301	13389	14071	13256	13670	13565	13426	13471	13350	13901	13391	13939	13606
		12929	13972	13631	13281	13272	14271	13301	13626	13513	13417	13579	13349	13974	13481	13959	13754
		12880	13989	13636	13444	13235	14099	13249	13680	13464	13421	13244	13217	13677	13348	13835	13709
		12957	14108	13578	13521	13155	14268	13383	13525	13459	13442	13412	13257	13842	13410	13894	13618
		13088	14031	13542	13339	13272	14154	13378	13555	13588	13541	13352	13342	13753	13368	13685	13553
		12942	13956	13695	13195	13191	13961	13261	13405	13559	13155	13382	13122	13643	13413	13886	13529
		13006	13884	13459	13201	13230	14094	13141	13506	13541	13354	13255	13205	13787	13281	13723	13546
		13051	13937	13687	13249	13291	14132	13218	13447	13435	13255	13296	13201	13765	13471	13867	13715
		12975	13767	13547	13272	13243	14051	13285	13565	13501	13293	13308	13248	13673	13304	13844	13599
		13105	13825	13719	13222	13178	14059	13110	13560	13374	13298	13277	13286	13812	13258	13731	13692
		12989	13745	13519	13224	13224	14163	13104	13587	13217	13339	13284	13165	13727	13320	13703	13595
		14663	12669	12679	12507	12402	13273	12359	12825	15886	12484	12389	13163	13027	12723	13130	13026
		15200	12478	12373	12194	12229	13028	12106	12655	15627	12442	12129	12547	12734	12515	12819	12721
		14936	12293	12251	11979	11938	12844	11910	12328	15620	12088	12060	12498	12531	12342	12723	12472
		14933	12029	11977	11774	11744	12601	11831	12381	15606	11892	11733	12357	12435	12102	12531	12394
		14833	11960	11960	11699	11571	12397	11609	11976	15592	11843	11605	11966	12168	11986	12303	12182
		14845	11697	11730	11572	11488	12233	11432	11951	15624	11634	11438	11724	12024	11677	12056	12025
		14897	11479	11563	11215	11245	12009	11254	11737	15495	11417	11315	11657	11831	11734	11910	11958
		14826	11315	11350	11158	11210	11877	11220	11554	15161	11364	11284	11609	11721	11455	11915	11792
		14687	11186	11336	11344	11090	11893	10963	11552	15423	11235	11176	11354	11435	11382	11458	11652
		14881	11084	11322	10908	10894	11777	10830	11361	15544	11071	10989	11267	11579	11223	11666	11496
		14903	11107	11047	10885	10775	11599	10766	11073	15382	10822	10798	11056	11299	11260	11477	11327
		14910	10978	10893	10764	10678	11415	10616	11154	15332	10685	10814	10832	11056	10862	11404	11293
		14782	10806	10869	10538	10418	11362	10393	10912	15374	10524	10667	10709	10993	10845	11316	11099
		14718	10668	10673	10521	10328	11234	10359	10843	15217	10419	10346	10596	10835	10755	11203	10888
		14728	10671	10782	10228	10337	11007	10166	10718	15229	10377	10321	10498	10821	10476	10832	10904
		14693	10384	10316	10268	10114	10912	9983	10634	15243	10112	10098	10289	10694	10377	10931	10785
		14913	10324	10288	10020	9887	10738	9960	10389	15309	9966	10119	10237	10459	10192	10618	10620
		14736	10112	10222	9912	9855	10622	9847	10361	15188	9908	10075	10106	10242	10124	10670	10514
		14908	9880	10024	9743	9756	10442	9610	10172	15021	9773	9930	9968	10238	10066	10562	10443
		14861	9795	9858	9655	9593	10341	9561	10076	14987	9723	9751	9908	9994	9816	10317	10312
		14722	9758	9756	9722	9470	10338	9547	9944	15041	9600	9698	9807	10078	9863	10272	10224
		14801	9600	9676	9426	9462	10128	9398	9872	15045	9376	9545	9658	10015	9665	10083	10054
		14556	9550	9551	9434	9348	10032	9293	9958	15032	9382	9567	9561	9734	9510	10068	10108
		14627	9402	9408	9213	9167	9965	9228	9624	15016	9357	9377	9403	9802	9532	9950	9906
		14644	9332	9394	9206	9129	9848	9103	9612	14836	9209	9274	9381	9683	9407	9869	9772
		14666	9187	9302	9117	8996	9807	9117	9521	14964	9068	9140	9327	9630	9246	9768	9801
		14654	9029	9242	8934	8891	9609	8911	9409	14843	9016	9085	9085	9512	9191	9633	9618
		14445	9030	9216	8934	8999	9600	8803	9319	14890	8899	8963	8989	9406	9122	9544	9571
		14609	9017	9015	8859	8817	9567	8819	9135	14825	8836	9030	8907	9261	9102	9622	9454
		14576	8913	8920	8626	8683	9364	8755	9172	14824	8674	8886	8810	9163	9070	9480	9496
		14656	8700	8855	8707	8589	9244	8649	9128	14751	8671	8898	8842	9251	8909	9234	9332
		14480	8598	8815	8568	8506	9156	8533	9032	14609	8591	8764	8750	9094	8767	9280	9217
		14453	8546	8629	8491	8535	9165	8481	8976	14631	8528	8663	8628	9006	8736	9288	9159
		14548	8579	8638	8483	8425	9088	8356	8923	14796	8399	8550	8553	8917	8797	9127	9148
		14575	8385	8647	8395	8316	9092	8306	8852	14677	8338	8517	8424	8764	8514	9053	8958
		14352	8346	8509	8238	8242	9002	8250	8760	14786	8245	8345	8415	8705	8525	8896	9021
		14320	8301	8383	8254	8198	8873	8154	8639	14745	8192	8316	8384	8732	8454	8955	8901
		14521	8355	8420	8204	8034	8897	8110	8608	14578	8223	8346	8221	8643	8369	8899	8850
		14437	8242	8269	8110	8070	8828	8027	8647	14456	8140	8224	8245	8562	8283	8821	8796
		14539	8140	8281	7927	8183	8661	7976	8446	14568	8092	8109	8188	8439	8267	8708	8610
		14266	8059	8160	7963	7913	8546	7955	8369	14547	7942	8057	8167	8431	8124	8642	8592
		14461	8076	8037	8059	7937	8467	7920	8342	14547	7860	8005	7996	8351	8117	8577	8590
		14322	8084	8025	7694	7874	8533	7792	8254	14678	7747	7951	7882	8230	8120	8586	8536
		14460	7860	7841	7701	7802	8391	7847	8281	14569	7725	7846	7972	8223	8004	8398	8369
		14385	7873	8032	7607	7690	8343	7781	8130	14555	7658	7863	7836	8103	7953	8367	8337
		14250	7808	7798	7688	7730	8318	7683	8122	14456	7658	7833	7817	8054	7816	8376	8269
		14365	7690	7906	7593	7553	8342	7605	8071	14591	7555	7650	7733	8014	7753	8268	8263
		14269	7606	7640	7523	7507	8170	7617	7996	14668	7516	7637	7612	7912	7817	8241	8197
		14401	7545	7628	7467	7507	8167	7457	7830	14316	7553	7633	7636	7890	7696	8145	8161
		14378	7557	7567	7429	7360	8001	7405	7813	14514	7359	7454	7531	7844	7708	8157	8038
		14265	7454	7510	7412	7436	7986	7371	7776	14565	7424	7474	7494	7774	7689	8058	7913
		14407	7432	7505	7281	7264	7916	7315	7727	14458	7405	7556	7342	7716	7572	8026	7864
		14358	7325	7451	7316	7336	7832	7414	7681	14426	7321	7425	7369	7644	7518	7941	7850
		14282	7275	7413	7309	7247	7832	7241	7690	14529	7215	7388	7391	7617	7453	7879	7752
		14436	7264	7395	7111	7136	7737	7127	7625	14395	7075	7248	7155	7611	7303	7864	7773
		14402	7124	7287	7092	7091	7781	7140	7637	14468	7079	7159	7076	7540	7401	7752	7793
		14380	7090	7340	6968	7001	7685	7158	7518	14316	7090	7097	7023	7488	7291	7797	7582
		14423	7172	7231	7016	7008	7625	7010	7433	14263	6926	7156	7100	7397	7259	7651	7637
		14315	7136	7106	6977	6962	7614	6841	7354	14392	6874	7019	6941	7312	7166	7602	7561
		14328	7009	7128	6899	6950	7565	6837	7318	14437	6867	7043	6973	7296	6979	7574	7601
		14304	6994	7119	6939	6933	7509	6856	7424	14369	6794	6958	6982	7238	7053	7547	7517
		14390	6972	7015	6841	6842	7456	6897	7213	14402	6799	6954	6915	7163	7017	7461	7385
		14356	6912	6995	6764	6775	7303	6878	7190	14198	6766	6830	6855	7154	6943	7374	7384
		14161	6896	6929	6790	6699	7291	6801	7177	14286	6800	6931	6755	7121	6925	7499	7294
		14347	6688	6814	6645	6675	7291	6718	7096	14259	6703	6810	6851	7116	6830	7346	7143
		14359	6745	6835	6666	6747	7241	6624	7109	14179	6653	6717	6726	7011	6896	7317	7211
		14175	6709	6866	6575	6750	7241	6628	7059	14215	6570	6711	6699	7047	6779	7203	7213
		14165	6697	6707	6632	6654	7110	6619	6958	14385	6503	6737	6604	7001	6767	7221	7095
		14266	6591	6682	6593	6469	7137	6563	6901	14367	6469	6607	6568	6883	6732	7136	7065
		14115	6670	6659	6476	6561	7178	6558	6898	14220	6435	6551	6554	6966	6681	7054	7092
		14564	6662	6609	6343	6445	7074	6503	6906	14273	6496	6617	6521	6849	6644	7055	7000
		14193	6505	6526	6476	6517	7012	6485	6848	14243	6437	6684	6478	6851	6649	7028	6988
		14463	6426	6528	6380	6405	6887	6426	6871	14372	6473	6544	6417	6782	6577	6981	6900
		14461	6335	6476	6282	6291	6915	6375	6780	14148	6304	6461	6426	6716	6469	6884	6849
		14557	6454	6492	6334	6433	6937	6415	6666	14351	6215	6392	6299	6684	6401	6868	6895
		14372	6421	6456	6320	6251	6818	6351	6736	14348	6244	6411	6176	6721	6468	6862	6783
		14211	6204	6376	6204	6332	6814	6275	6698	14156	6234	6319	6338	6673	6435	6901	6715
		14149	6331	6357	6175	6238	6736	6294	6578	14278	6110	6361	6310	6555	6333	6728	6677
		14298	6224	6381	6192	6128	6739	6273	6605	14280	6191	6267	6260	6564	6310	6731	6718
		14340	6248	6329	6140	6166	6735	6166	6555	14287	6118	6253	6246	6610	6318	6731	6658
		14265	6149	6286	6097	6090	6652	6161	6498	14098	6044	6201	6135	6485	6306	6718	6615
		14378	6162	6276	6059	6157	6753	6067	6518	14235	6105	6062	6131	6480	6252	6670	6594
		14174	6078	6181	6032	6023	6639	6152	6468	14131	5977	6069	6134	6473	6303	6595	6500
		14147	6068	6126	6057	6067	6583	6043	6446	14228	5932	6070	6089	6344	6144	6591	6535
		14065	5980	6191	6015	5969	6549	6028	6389	14210	5995	5984	6046	6358	6143	6495	6422
		14175	6043	6162	5980	5961	6497	6026	6292	14234	5983	6094	6003	6272	6153	6473	6457
		14153	6037	6021	5923	5875	6444	6001	6347	14251	5824	6039	6006	6251	6090	6414	6372
		14143	5917	6027	5934	5880	6442	5940	6241	14395	5834	5941	5991	6234	6051	6332	6404
		14174	5908	6035	5853	5827	6440	5929	6242	14265	5790	5935	5905	6209	5990	6349	6417
		14027	5877	5971	5779	5767	6359	5915	6231	14207	5753	5923	5871	6176	5958	6318	6278
		14220	5864	5969	5855	5825	6342	5841	6123	14286	5775	5863	5912	6202	5981	6301	6291
		14213	5843	5864	5804	5872	6385	5858	6158	14257	5763	5960	5809	6069	5972	6199	6201
		14276	5929	5915	5714	5718	6248	5780	6178	14225	5674	5880	5790	6115	5910	6232	6184
		14024	5824	5886	5765	5738	6252	5778	6244	14357	5696	5784	5762	6094	5948	6162	6205
		14013	5803	5832	5687	5710	6234	5695	6019	14385	5635	5741	5807	6066	5843	6163	6192
		14329	5706	5798	5635	5561	6185	5683	6067	14186	5641	5805	5691	6001	5821	6153	6157
		14156	5711	5796	5620	5693	6132	5702	6002	14326	5542	5603	5730	5948	5766	6171	6045
		14143	5654	5710	5567	5594	6124	5713	5984	14099	5629	5716	5669	6010	5737	6054	6051
		14168	5628	5740	5560	5578	6112	5634	5970	14204	5450	5668	5636	5907	5747	6127	6025
		14350	5602	5700	5512	5533	6153	5615	5879	14121	5545	5664	5585	5892	5672	6092	5930
		14073	5588	5647	5511	5527	6016	5574	5950	14206	5513	5597	5619	5921	5746	6019	5971
		13974	5597	5657	5543	5534	6070	5608	5864	14164	5508	5610	5558	5827	5632	6006	5941
		14082	5552	5667	5486	5472	6008	5500	5781	14203	5469	5630	5536	5785	5618	5947	5907
		14051	5491	5647	5439	5504	5996	5518	5911	14072	5488	5525	5504	5803	5574	5973	5932
		14140	5439	5550	5483	5430	5918	5531	5855	14358	5415	5476	5469	5786	5591	5997	5862
		14020	5499	5633	5380	5428	5922	5463	5741	14108	5401	5467	5459	5740	5545	5937	5799
		13985	5478	5461	5390	5336	5889	5446	5751	14150	5331	5505	5464	5711	5494	5884	5707
		14251	5469	5489	5306	5426	5854	5465	5657	14047	5284	5513	5286	5696	5479	5867	5708
		14102	5435	5431	5330	5404	5960	5381	5725	13947	5355	5344	5362	5621	5466	5845	5701
		14048	5391	5451	5341	5326	5864	5400	5649	14077	5287	5394	5379	5661	5475	5826	5686
		14043	5338	5434	5220	5286	5786	5330	5611	14058	5265	5473	5287	5646	5491	5718	5702
		14149	5355	5404	5207	5312	5759	5255	5554	14202	5224	5319	5355	5745	5419	5797	5680
		14020	5371	5363	5214	5259	5818	5323	5607	14126	5201	5316	5330	5639	5395	5744	5673
		13946	5290	5367	5227	5272	5801	5289	5535	13970	5212	5343	5313	5573	5342	5713	5634
		14209	5273	5329	5226	5213	5683	5328	5577	14110	5201	5306	5272	5547	5353	5634	5577
		13953	5242	5336	5184	5154	5649	5267	5632	13997	5141	5244	5219	5529	5348	5624	5569
		14152	5302	5327	5163	5149	5647	5252	5510	13991	5147	5261	5222	5488	5305	5660	5504
		14054	5170	5238	5198	5145	5565	5248	5495	14208	5122	5229	5188	5492	5301	5660	5581
		14022	5106	5238	5102	5191	5685	5220	5459	14225	5087	5186	5190	5498	5297	5536	5549
		13979	5194	5237	5093	5091	5586	5220	5416	14204	5076	5106	5132	5381	5305	5543	5472
		14088	5123	5292	5142	5063	5607	5192	5419	13989	5051	5155	5150	5410	5246	5588	5414
		14072	5116	5202	5078	5065	5636	5148	5446	14079	4976	5103	5104	5413	5210	5553	5460
		14104	5078	5221	5095	5034	5519	5100	5345	14142	4994	5149	4972	5436	5198	5497	5412
		14202	5169	5142	5067	5040	5483	5070	5394	14172	4972	5136	5032	5375	5137	5471	5376
		13953	5012	5132	5048	5043	5537	5113	5349	14041	4926	5072	5049	5251	5169	5438	5399
		14070	5103	5195	5003	5037	5408	5033	5335	13904	4940	5108	4981	5309	5186	5450	5337
		14031	5033	5108	4956	4978	5469	5014	5279	14058	4977	5065	5001	5282	5097	5428	5342
		13923	4969	5111	5016	5011	5431	5039	5279	14145	4903	4999	4990	5320	5093	5423	5266
		13940	5004	5119	4982	4986	5449	4986	5265	14009	4966	4964	5011	5224	5050	5431	5333
		13971	4982	5087	4864	4903	5382	4921	5229	14063	4876	4946	5027	5209	5060	5450	5325
		14175	4962	4966	4941	4912	5358	4964	5215	13931	4800	4983	4987	5194	5008	5370	5282
		14013	4964	5028	4892	5004	5388	4914	5157	14093	4795	4933	4989	5258	5022	5295	5289
		14023	4912	5017	4892	4905	5302	4958	5177	14137	4856	4899	4912	5254	5013	5251	5150
		14122	4912	4952	4824	4873	5271	4898	5177	14137	4757	4889	4852	5194	4965	5293	5250
		14075	4884	4966	4818	4867	5294	4857	5158	14008	4766	4949	4794	5177	4997	5266	5200
		14014	4872	4921	4791	4845	5293	4842	5124	14151	4771	4875	4814	5101	4942	5170	5139
		14077	4833	4903	4768	4822	5238	4876	5149	14069	4747	4840	4819	5085	4943	5198	5141
		13867	4860	4868	4770	4783	5293	4860	5130	14158	4735	4775	4816	5070	4967	5187	5194
		13844	4773	4936	4760	4737	5187	4889	5088	13968	4735	4772	4804	5087	4921	5235	5107
		13927	4829	4895	4745	4756	5221	4828	5043	13985	4699	4770	4853	5071	4899	5106	5061
		13823	4796	4880	4715	4791	5230	4824	5016	13983	4706	4808	4777	5080	4839	5185	5081
		13913	4826	4805	4682	4782	5206	4756	4990	13887	4669	4768	4756	5016	4877	5125	5070
		14003	4770	4777	4683	4742	5163	4820	5022	13907	4652	4810	4724	4995	4836	5181	5053
		13997	4774	4809	4644	4735	5140	4801	5001	13943	4628	4747	4743	4954	4792	5125	5025
		13978	4740	4815	4680	4736	5147	4795	4990	13980	4651	4699	4663	4994	4775	5138	5004
		13980	4683	4719	4683	4718	5137	4724	4926	13883	4657	4646	4736	4918	4807	5106	4981
		13905	4709	4839	4627	4703	5108	4708	4900	13863	4545	4682	4649	4968	4739	5066	4976
		14070	4670	4726	4591	4598	5070	4735	4891	13863	4542	4631	4630	4905	4783	5009	4950
		13905	4701	4736	4643	4616	5062	4711	4876	13775	4510	4636	4616	4882	4660	5044	4986
		13987	4676	4704	4632	4615	5052	4678	4876	13920	4606	4657	4659	4918	4746	4979	4992
		13940	4642	4727	4580	4569	5060	4614	4883	13787	4574	4624	4609	4840	4720	5010	4935
		14019	4695	4616	4553	4567	4984	4650	4826	13930	4493	4607	4618	4841	4682	4964	4950
		14016	4592	4657	4569	4564	5025	4635	4884	14032	4515	4629	4571	4862	4647	4910	4928
		13875	4558	4655	4530	4547	4959	4668	4813	13969	4427	4580	4587	4815	4691	4949	4936
		13845	4648	4702	4584	4500	4954	4595	4806	13924	4464	4576	4576	4807	4633	4921	4876
		14015	4546	4634	4538	4544	4882	4640	4861	13845	4430	4567	4562	4821	4646	4907	4836
		13976	4484	4591	4459	4536	4979	4623	4798	13846	4399	4547	4594	4828	4582	4910	4816
		14098	4485	4593	4491	4544	4940	4558	4817	13949	4468	4507	4557	4717	4625	4877	4819
		13877	4516	4549	4430	4492	4856	4549	4720	13943	4386	4524	4556	4791	4586	4870	4723
		13771	4482	4626	4447	4525	4934	4539	4726	13862	4434	4527	4536	4663	4518	4856	4747
		13955	4563	4579	4448	4437	4847	4516	4750	13868	4384	4501	4420	4734	4574	4822	4739
		13885	4569	4554	4464	4450	4818	4487	4678	13828	4359	4519	4448	4719	4535	4846	4734
		13745	4422	4588	4399	4453	4896	4510	4684	13779	4407	4433	4469	4701	4554	4825	4711
		13894	4414	4536	4408	4444	4868	4507	4706	13841	4325	4451	4444	4696	4505	4814	4748
		13862	4464	4500	4357	4389	4851	4506	4606	13975	4334	4415	4459	4669	4522	4788	4688
		13867	4445	4488	4378	4349	4842	4508	4621	13872	4305	4400	4365	4656	4479	4724	4685
		13963	4435	4496	4406	4386	4772	4478	4571	13899	4321	4399	4417	4636	4503	4744	4714
		13745	4429	4475	4293	4375	4760	4432	4616	13807	4295	4365	4394	4618	4456	4763	4666
		13863	4416	4502	4376	4371	4729	4381	4569	13853	4277	4332	4340	4615	4457	4712	4625
		13970	4401	4437	4331	4387	4812	4410	4572	13808	4198	4347	4319	4652	4457	4658	4628
		13847	4364	4385	4323	4412	4770	4431	4620	13733	4276	4314	4365	4615	4498	4691	4611
		13828	4327	4403	4289	4308	4741	4347	4572	13733	4262	4336	4337	4618	4394	4678	4659
		13991	4346	4465	4328	4307	4712	4404	4568	13925	4281	4321	4322	4574	4427	4627	4512
		13782	4354	4385	4278	4303	4678	4369	4525	13906	4241	4312	4405	4530	4382	4625	4499
		13766	4348	4421	4282	4268	4662	4361	4581	13605	4233	4328	4310	4592	4375	4680	4544
		14043	4337	4421	4287	4265	4652	4392	4529	13842	4207	4359	4331	4471	4356	4649	4601
		13709	4309	4374	4273	4246	4670	4361	4510	13797	4198	4310	4292	4472	4318	4629	4557
		13866	4303	4371	4206	4263	4688	4351	4482	13638	4134	4270	4255	4549	4404	4629	4498
		13759	4290	4360	4208	4225	4633	4322	4445	13562	4165	4267	4261	4502	4321	4660	4533
		13916	4255	4338	4181	4232	4610	4321	4426	13837	4153	4237	4337	4462	4322	4577	4478
		13964	4210	4298	4195	4149	4603	4292	4421	13807	4147	4215	4250	4523	4341	4583	4519
		13751	4238	4272	4195	4209	4582	4266	4466	13651	4087	4218	4237	4453	4304	4547	4548
		13949	4202	4310	4177	4224	4540	4256	4456	13778	4058	4233	4293	4444	4294	4566	4507
		13842	4272	4290	4208	4197	4604	4246	4370	13708	4133	4191	4199	4465	4227	4505	4366
		13712	4174	4290	4121	4138	4581	4258	4400	13719	4122	4232	4238	4409	4250	4548	4460
		13816	4135	4245	4201	4165	4496	4202	4369	13830	4084	4176	4158	4413	4245	4448	4380
		13895	4188	4230	4131	4117	4584	4229	4390	13690	4082	4167	4179	4465	4317	4469	4450
		13787	4135	4268	4189	4145	4543	4265	4354	13785	4066	4231	4154	4332	4286	4538	4372
		13923	4205	4269	4064	4079	4545	4186	4352	13746	4062	4139	4154	4344	4287	4480	4345
		13808	4109	4234	4136	4134	4532	4186	4357	13711	4037	4175	4133	4353	4145	4512	4335
		13841	4101	4217	4054	4107	4440	4233	4337	13681	4009	4090	4143	4394	4211	4465	4368
		13608	4149	4210	4083	4143	4509	4197	4353	13688	4043	4066	4082	4335	4156	4429	4388
		13682	4025	4209	4042	4088	4444	4111	4369	13692	4027	4186	4085	4318	4169	4391	4294
		13823	4091	4184	4029	4122	4443	4167	4296	13739	4015	4052	4123	4344	4242	4427	4328
		13644	4113	4139	4012	4070	4450	4170	4303	13647	3986	4045	4112	4375	4132	4421	4331
		13798	4070	4139	4077	4034	4426	4134	4274	13738	4052	4046	4015	4287	4190	4378	4308
		13725	4129	4157	4042	4059	4494	4091	4291	13746	3998	4078	4065	4275	4127	4349	4276
		13875	4098	4130	4080	4074	4442	4076	4272	13676	3987	4053	4087	4246	4158	4391	4269
		13690	4030	4160	4058	4038	4420	4109	4231	13372	3971	4027	4074	4274	4110	4302	4275
		13724	4002	4139	4015	4044	4377	4064	4261	13793	3898	4058	4002	4271	4068	4317	4253
		12356	1872	1892	2068	1544	1943	2212	1950	12981	1979	1874	2087	1818	1975	2086	1871
		12848	1902	1927	2164	1532	1955	2264	1985	13065	1990	1832	2078	1771	2051	2055	1870
		12977	1973	1958	2219	1525	1943	2318	2023	12877	1956	1844	2118	1738	2051	2098	1869
		12974	1921	1978	2231	1520	2070	2324	2028	12839	1949	1853	2127	1699	2046	2150	1923
		12886	1863	1919	2260	1507	2043	2358	2045	13000	1992	1898	2137	1719	2066	2165	1945
		12855	1826	1953	2250	1521	2110	2383	2034	12908	2001	1884	2165	1691	2100	2233	1981
		12783	1806	1934	2277	1517	2090	2399	2060	12775	1992	1880	2145	1676	2106	2214	1996
		12670	1789	1908	2330	1499	2114	2386	2059	12708	1983	1910	2187	1738	2112	2227	2021
		12721	1783	1948	2351	1492	2138	2455	2076	12943	2017	1890	2185	1753	2101	2272	2028
		12741	1783	1909	2339	1471	2117	2417	2089	12897	2002	1917	2179	1694	2145	2291	2032
		12914	1757	1931	2381	1479	2140	2469	2092	12958	1996	1938	2220	1696	2142	2318	2056
		12884	1761	1932	2396	1485	2139	2523	2086	12667	2036	1946	2248	1698	2160	2327	2096
		12700	1748	1932	2389	1470	2199	2524	2136	12670	2016	1962	2223	1729	2177	2352	2110
		12797	1756	1925	2404	1472	2194	2512	2107	12738	2069	1948	2260	1742	2198	2355	2120
		12675	1738	1935	2478	1493	2207	2588	2134	12812	2058	1964	2289	1752	2209	2389	2142
		12681	1726	1950	2488	1496	2208	2594	2114	12539	2064	1992	2303	1759	2263	2423	2157
		12785	1731	1951	2506	1519	2242	2580	2212	12598	2079	1992	2313	1750	2261	2451	2151
		12876	1755	1964	2497	1500	2243	2641	2171	12557	2110	2007	2294	1790	2250	2406	2157
		12535	1750	1980	2544	1530	2255	2638	2221	12628	2099	2049	2310	1813	2298	2461	2203
		12498	1744	1973	2560	1529	2308	2635	2235	12566	2094	2034	2368	1806	2285	2480	2226
		12529	1754	2013	2529	1522	2317	2669	2267	12512	2115	2049	2364	1812	2315	2503	2200

## Sheet: Fig2D
EcoDMT
Lipid to protein ration 50
Mn and Mg Competition
NORMALIZED DATA																																			Condition
		Mn (uM)/Mg(mM)									Mn (uM)/Mg(mM)									Mn (uM)/Mg(mM)									Mn (uM)/Mg(mM)						Mean	SEM	N
	Time (min)	0/0	50/0	50/0.5	50/0.5	50/0.5	50/2	50/2	50/2		0/0	50/0	50/0.5	50/0.5	50/0.5	50/2	50/2	50/2		0/0	50/0	50/0.5	50/0.5	50/0.5	50/2	50/2	50/2		50/0					Time (min)	0 μM Mn2+ / 0 mM Mg2+			50 μM Mn2+ / 0 mM Mg2+			50 μM Mn2+ / 0.5 mM Mg2+			50 μM Mn2+ / 2 mM Mg2+
	-6.93892	108.781	116.507	114.798	111.887	120.858	113.741	116.427	117.465		114.643	128.358	133.895	135.875	140.42	138.641	143.617	144.119		130.162	135.664	131.693	134.624	136.92	138.023	140.91	142.062		121.227					-6.93892	117.862	6.3786	3	125.439	4.1893	4	128.997	3.46424	9	132.778	4.28914	9
	-6.8713	108.788	115.507	114.511	111.248	119.27	111.51	116.895	117.718		113.371	128.936	133.887	136.511	139.797	139.61	143.996	146.312		128.644	134.376	131.169	133.137	138.012	136.168	139.124	141.266		120.606					-6.8713	116.934	6.00267	3	124.856	4.21045	4	128.616	3.57129	9	132.511	4.42575	9
	-6.80343	107.403	115.904	114.182	110.569	119.283	111.469	117.076	116.026		113.534	129.212	131.613	135.76	139.441	137.681	142.655	142.266		126.879	132.963	127.896	131.469	133.983	134.795	138.542	141.203		118.765					-6.80343	115.939	5.74915	3	124.211	4.08525	4	127.133	3.36652	9	131.301	4.21881	9
	-6.73558	106.942	115.5	113.537	110.596	118.204	111.584	116.553	115.18		112.217	127.547	131.817	134.488	138.187	137.059	142.036	144.932		125.699	132.746	128.763	129.903	133.173	133.839	137.944	140.233		119.947					-6.73558	114.953	5.58474	3	123.935	3.84852	4	126.519	3.29077	9	131.04	4.2981	9
	-6.66772	105.837	115.153	112.576	110.155	117.207	110.462	114.458	114.987		112.396	127.349	131.366	133.966	137.689	138.065	141.435	144.544		124.151	129.898	126.592	128.015	132.579	132.41	135.941	140.186		119.149					-6.66772	114.128	5.35726	3	122.887	3.45015	4	125.572	3.29883	9	130.276	4.40987	9
	-6.59958	106.136	114.451	112.892	109.408	117.832	110.186	114.535	114.734		111.853	127.478	131.059	132.288	138.089	136.784	141.019	142.653		123.49	129.401	126.232	127.999	131.183	131.607	134.034	138.444		118.815					-6.59958	113.826	5.10585	3	122.536	3.5446	4	125.22	3.22872	9	129.333	4.2139	9
	-6.53198	105.388	114.841	111.63	108.932	117.647	109.709	112.915	115.034		111.957	126.797	131.358	133.71	136.248	136.848	141.407	141.5		121.694	129.02	125.342	126.945	129.795	131.398	134.05	137.742		117.958					-6.53198	113.013	4.73647	3	122.154	3.41311	4	124.623	3.24768	9	128.956	4.25791	9
	-6.46412	103.945	114.018	111.272	108.328	115.804	110.3	113.516	114.261		111.272	126.684	130.71	132.977	136.711	136.199	140.214	139.495		123.505	127.895	124.186	125.537	130.364	130.699	132.854	135.551		117.456					-6.46412	112.907	5.70517	3	121.513	3.41695	4	123.988	3.34346	9	128.121	3.99326	9
	-6.396	104.823	112.324	110.887	107.553	116.271	108.936	112.978	113.082		111.429	125.106	129.058	132.641	135.999	135.303	139.456	142.01		121.235	127.018	124.803	125.293	128.607	129.969	131.852	134.487		117.505					-6.396	112.496	4.76779	3	120.488	3.40977	4	123.457	3.2645	9	127.564	4.16927	9
	-6.32813	104.387	111.551	110.754	106.433	115.226	108.063	113.558	112.995		111.19	124.89	128.803	132.261	134.62	135.275	138.865	141.415		119.567	125.256	121.459	124.467	126.729	127.062	130.01	134.503		117.466					-6.32813	111.715	4.38987	3	119.791	3.28096	4	122.306	3.23493	9	126.861	4.11239	9
	-6.26027	103.328	111.31	109.716	106.351	115.143	107.727	111.219	113.195		110.03	124.07	127.448	129.753	134.247	135.239	138.994	139.457		118.786	124.061	122.717	123.413	127.259	127.487	129.476	132.477		116.816					-6.26027	110.714	4.47539	3	119.064	3.0986	4	121.783	3.14535	9	126.141	4.09559	9
	-6.19213	102.47	110.905	110.018	106.208	114.717	108.694	110.828	111.117		111.585	124.648	126.886	130.106	133.802	133.446	137.718	137.235		116.374	123.735	121.217	123.043	124.98	126.09	128.806	130.853		117.643					-6.19213	110.143	4.0779	3	119.233	3.18157	4	121.22	3.0731	9	124.976	3.89475	9
	-6.12428	103.503	110.53	109.148	105.943	114.153	106.397	110.262	108.246		109.472	122.543	128.053	130.106	132.548	132.989	138.819	139.713		116.975	123.176	122.686	120.62	124.675	124.661	127.182	132.761		116.934					-6.12428	109.983	3.89726	3	118.296	2.94427	4	120.881	3.11006	9	124.559	4.37567	9
	-6.05667	102.574	109.594	109.415	105.93	113.493	106.712	110.479	109.831		109.338	123.708	125.183	129.461	133.144	133.108	137.007	135.666		116.464	121.337	120.959	121.438	124.555	124.211	126.172	130.475		117.771					-6.05667	109.459	4.01012	3	118.102	3.08747	4	120.397	3.03636	9	123.74	3.93825	9
	-5.98882	102.522	110.012	109.604	104.666	113.39	105.691	110.179	108.819		109.092	123.639	126.444	127.032	133.001	131.26	135.712	135.269		116.351	122.64	120.577	120.227	123.399	123.737	125.622	128.394		117.141					-5.98882	109.322	3.99379	3	118.358	3.12735	4	119.815	3.02425	9	122.743	3.8754	9
	-5.92068	101.755	108.927	108.686	104.7	112.592	106.356	109.844	109.412		108.519	123.044	124.544	127.995	131.507	131.58	137.053	137.434		114.683	121.43	120.647	120.227	121.874	122.605	124.717	126.754		117.052					-5.92068	108.319	3.73331	3	117.613	3.15987	4	119.197	2.96302	9	122.862	3.96374	9
	-5.85252	101.417	110.331	107.844	104.456	111.416	105.133	108.922	109.052		108.981	121.767	125.362	128.286	130.422	131.077	135.222	134.418		114.345	121.158	120.123	120.038	121.642	122.725	124.337	126.281		116.511					-5.85252	108.248	3.7499	3	117.442	2.64489	4	118.843	3.02708	9	121.908	3.83482	9
	-5.78492	101.495	109.338	108.041	104.891	111.244	105.725	107.868	107.354		108.393	122.681	124.936	126.44	131.48	131.882	134.483	136.346		113.729	120.708	117.874	119.581	121.441	122.364	123.449	127.968		116.127					-5.78492	107.872	3.54112	3	117.214	2.96236	4	118.436	2.95895	9	121.938	4.04184	9
	-5.71707	100.455	107.417	108.651	105.026	111.588	105.227	108.65	108.013		108.304	122.164	125.473	126.246	131.213	131.041	135.121	131.675		113.24	120.941	119.834	119.062	122.187	122.436	122.317	124.712		114.305					-5.71707	107.333	3.72254	3	116.207	3.40064	4	118.809	2.91405	9	121.021	3.72997	9
	-5.64893	99.4605	107.984	108.188	104.368	111.347	103.138	106.779	106.261		106.533	121.327	124.212	124.541	131.302	131.672	134.418	137.661		113.015	119.955	118.389	117.685	120.061	121.368	122.859	124.689		115.379					-5.64893	106.336	3.91399	3	116.161	3.0077	4	117.788	2.85967	9	120.983	4.29346	9
	-5.58133	98.44	106.672	107.578	104.273	109.394	103.36	106.96	106.967		107.708	121.551	123.974	126.007	129.034	129.532	134.621	132.3		113.616	118.015	119.272	117.245	118.978	122.107	120.572	123.199		115.733					-5.58133	106.588	4.41655	3	115.493	3.17441	4	117.306	2.86619	9	119.958	3.88675	9
	-5.51347	98.921	108.431	107.816	103.668	110.164	103.79	108.762	106.015		106.354	120.654	122.466	125.159	129.354	128.27	132.319	134.389		112.834	117.665	119.248	117.017	119.563	119.915	121.582	121.189		114.571					-5.51347	106.037	4.01958	3	115.33	2.61364	4	117.162	2.81187	9	119.581	3.75318	9
	-5.4456	98.6285	106.311	107.206	103.532	108.871	103.83	107.302	106.708		105.007	120.214	122.705	124.576	129.159	127.355	133.235	130.541		111.91	117.976	117.436	118.11	117.341	118.783	121.073	122.876		114.945					-5.4456	105.182	3.83505	3	114.861	3.04783	4	116.548	2.8403	9	119.078	3.61902	9
	-5.37773	98.7195	107.098	105.769	103.566	109.704	102.735	106.123	105.182		106.548	120.412	121.598	125.645	129.505	127.355	130.951	134.162		110.911	117.518	119.069	116.033	119.531	120.26	121.752	121.236		115.044					-5.37773	105.393	3.56635	3	115.018	2.85889	4	116.713	2.9415	9	118.862	3.86911	9
	-5.30987	98.037	107.388	105.945	104.361	109.037	102.849	106.793	105.249		106.183	119.446	121.18	125.336	127.335	127.785	132.172	130.484		110.573	116.478	116.507	116.214	117.397	120.188	119.675	120.936		114.473					-5.30987	104.931	3.67246	3	114.446	2.5648	4	115.923	2.71249	9	118.459	3.69779	9
	-5.242	97.7576	106.587	105.832	102.866	108.816	102.143	106.388	105.722		106.004	118.635	122.347	123.719	127.958	126.569	131.367	135.165		109.731	117.332	116.671	115.734	116.779	119.802	119.821	120.069		114.128					-5.242	104.498	3.53759	3	114.171	2.69926	4	115.636	2.8143	9	118.561	3.89403	9
	-5.17415	98.895	105.949	105.279	103.369	107.627	102.815	106.786	105.049		105.9	119.239	121.3	125.124	128.589	126.687	131.34	132.498		110.558	116.183	116.514	115.113	116.683	116.92	119.013	118.934		113.843					-5.17415	105.118	3.38936	3	113.803	2.84166	4	115.511	2.91971	9	117.782	3.70868	9
	-5.10628	97.3936	105.19	105.174	102.629	108.191	102.016	105.061	104.996		105.357	118.972	121.606	123.198	126.09	129.212	132.329	128.423		110.054	115.29	115.803	114.562	116.651	117.385	119.158	118.012		113.971					-5.10628	104.268	3.69511	3	113.356	2.92021	4	114.878	2.7214	9	117.399	3.78251	9
	-5.03842	97.4586	106.367	105.012	103.138	107.345	102.117	105.292	103.217		104.874	119.817	121.632	122.226	125.983	125.288	130.35	131.666		108.942	115.088	115.694	114.019	115.768	116.703	118.011	118.138		114.571					-5.03842	103.758	3.36158	3	113.961	2.79285	4	114.535	2.67698	9	116.754	3.74989	9
	-4.97028	96.8801	105.524	105.174	103.057	107.338	101.082	105.229	104.576		104.516	119.498	121.615	122.588	125.431	125.645	128.936	130.815		107.807	115.205	115.046	114.727	115.535	116.952	118.14	118.13		112.1					-4.97028	103.068	3.23649	3	113.082	2.94058	4	114.501	2.65149	9	116.612	3.64306	9
	-4.90217	96.1716	105.63	104.648	103.417	106.526	102.069	106.367	101.932		103.013	119.42	120.388	122.067	124.711	125.462	128.714	131.855		108.807	114.863	115.366	112.525	115.623	115.081	116.718	117.074		113.597					-4.90217	102.664	3.65162	3	113.378	2.86929	4	113.919	2.58886	9	116.141	3.70747	9
	-4.83457	96.9906	105.403	104.844	101.848	104.979	101.068	104.901	103.55		102.731	118.454	121.436	122.394	125.796	125.846	128.714	128.007		108.168	114.374	114.663	113.461	113.778	115.868	118.471	116.506		111.844					-4.83457	102.63	3.22704	3	112.519	2.73493	4	113.689	2.83259	9	115.881	3.55541	9
	-4.7667	96.6461	104.254	105.917	100.999	105.99	100.941	105.404	102.564		104.323	118.859	118.625	121.661	125.556	124.044	129.786	130.04		107.101	113.164	114.069	113.469	114.974	115.844	116.5	114.725		112.642					-4.7667	102.69	3.12656	3	112.23	3.00834	4	113.473	2.6638	9	115.539	3.67321	9
	-4.69883	96.1001	105.268	104.872	102.33	104.917	101.008	105.557	103.264		101.421	119.403	119.119	121.299	124.266	123.331	128.021	130.38		108.469	114.957	115.03	113.335	114.203	114.631	116.548	114.796		111.608					-4.69883	101.997	3.58205	3	112.809	2.97764	4	113.263	2.5915	9	115.282	3.5356	9
	-4.6307	95.6776	104.148	104.9	101.807	105.742	102.19	104.587	101.019		103.088	119.161	120.933	120.963	124.907	124.492	127.309	126.38		107.319	114.584	113.319	112.918	113.176	115.876	117.009	117.011		112.779					-4.6307	102.028	3.40206	3	112.668	3.14161	4	113.185	2.6654	9	115.097	3.43163	9
	-4.5631	96.5421	103.836	102.916	101.63	104.931	99.8455	104.726	102.338		102.746	117.108	119.256	121.087	125.013	123.13	127.78	125.539		106.613	113.722	114.702	113.012	113.914	114.005	116.435	114.859		112.632					-4.5631	101.967	2.93307	3	111.825	2.8282	4	112.94	2.76037	9	114.295	3.40472	9
	-4.49525	96.0546	104.141	103.344	101.012	104.855	101.068	104.091	101.672		103.207	118.394	119.196	120.689	124.293	122.7	126.985	125.331		106.65	114.646	112.913	112.178	114.34	113.804	116.314	113.408		111.952					-4.49525	101.971	3.1205	3	112.283	3.01835	4	112.536	2.71023	9	113.93	3.32455	9
	-4.42737	94.6766	104.566	103.638	101.623	103.803	100.652	104.356	101.246		101.376	118.566	119.145	120.477	122.887	122.727	127.383	129.123		106.613	113.878	113.179	111.95	113.649	113.611	116.12	113.661		110.318					-4.42737	100.889	3.45424	3	111.832	2.9526	4	112.261	2.60801	9	114.32	3.5778	9
	-4.35898	96.1911	103.659	103.526	101.746	103.831	100.356	105.215	100.613		101.057	118.368	118.387	119.991	124.64	123.322	125.987	126.541		106.537	112.799	112.515	111.4	113.449	113.346	115.684	115.245		111.283					-4.35898	101.262	2.98848	3	111.527	3.03289	4	112.165	2.663	9	114.034	3.4059	9
	-4.29113	95.1056	103.276	103.498	101.304	103.659	99.7716	103.812	100.26		102.374	118.126	120.286	121.723	123.403	124.108	126.81	125.719		105.621	115.166	113.718	111.494	112.839	112.551	113.898	113.708		111.322					-4.29113	101.033	3.10853	3	111.973	3.2161	4	112.436	2.76809	9	113.404	3.53088	9
	-4.22328	95.4111	102.978	102.545	99.9592	103.136	98.5285	102.276	101.552		101.347	117.669	119.571	121.74	122.612	122.151	125.072	124.565		106.342	112.768	113.061	110.778	112.037	112.214	114.884	113.298		111.588					-4.22328	101.033	3.15937	3	111.251	3.05566	4	111.715	2.83735	9	112.727	3.37945	9
	-4.15542	95.2291	103.056	102.348	100.822	103.789	98.9854	103.651	101.106		101.622	118.212	118.975	119.276	124.738	121.557	126.394	127.666		105.523	113.226	112.702	110.817	112.342	113.065	113.93	113.913		111.194					-4.15542	100.791	3.00047	3	111.422	3.1544	4	111.756	2.76591	9	113.363	3.52276	9
	-4.08755	94.7351	103.999	103.113	99.3751	102.82	99.4289	103.658	99.8801		100.208	118.514	116.914	118.569	122.14	122.014	126.967	128.461		105.666	112.768	113.694	110.731	111.716	112.158	115.037	112.991		111.204					-4.08755	100.203	3.15541	3	111.621	2.98749	4	111.008	2.60469	9	113.399	3.65596	9
	-4.01968	94.8651	103.226	102.257	100.632	103.707	99.1668	102.883	100.546		100.588	117.307	118.77	120.38	121.5	120.569	126.477	124.168		104.967	112.054	112.608	110.951	111.852	111.531	115.078	111.469		110.357					-4.01968	100.14	2.92471	3	110.736	2.90756	4	111.406	2.62879	9	112.432	3.37134	9
	-3.95182	94.6246	103.361	101.865	99.9049	103.377	99.3214	101.724	100.566		100.729	116.892	116.249	119.673	122.665	122.261	124.304	126.825		105.132	112.294	111.796	109.952	110.592	111.154	113.243	112.802		109.806					-3.95182	100.162	3.04653	3	110.588	2.82102	4	110.675	2.64698	9	112.467	3.48502	9
	-3.88395	93.7602	103.361	102.713	99.6128	103.205	98.6965	102.52	99.3339		101.295	116.297	117.799	119.355	122.407	122.169	124.471	123.799		105.17	111.402	112.124	110.912	111.17	111.331	112.532	113.629		109.865					-3.88395	100.075	3.34967	3	110.231	2.66925	4	111.033	2.65246	9	112.054	3.39279	9
	-3.81608	94.2476	103.099	101.97	100.625	103.363	97.7961	103.044	99.6869		100.097	116.202	117.578	119.514	122.629	120.944	124.767	123.657		104.366	110.812	112.272	111.258	110.384	112.262	112.637	113.298		109.235					-3.81608	99.57	2.93271	3	109.837	2.69621	4	111.066	2.63665	9	112.01	3.36362	9
	-3.74822	93.6302	102.567	102.187	100.557	103.721	98.1523	102.911	98.7744		101.31	116.28	117.144	119.541	120.246	120.532	123.777	126.759		104.231	111.642	113.226	110.078	110.368	111.459	113.421	112.423		109.373					-3.74822	99.7234	3.16115	3	109.965	2.85446	4	110.785	2.47674	9	112.023	3.49821	9
	-3.68035	93.0322	101.744	101.9	99.5653	103.535	97.944	102.639	100.133		99.308	115.918	117.782	119.452	123.048	119.92	124.914	122.91		104.043	110.952	111.03	110.149	109.364	111.708	113.211	111.903		110.456					-3.68035	98.7943	3.18883	3	109.767	2.94491	4	110.647	2.72376	9	111.698	3.28148	9
	-2.43995	92.6292	98.0572	98.2194	98.3902	101.169	96.7681	98.4292	90.8546		101.808	119.783	118.838	123.542	124.302	124.3	125.876	122.702		102.991	105.751	110.124	106.073	109.019	105.886	109.3	108.198		118.125					-2.43995	99.1426	3.27457	3	110.429	5.17742	4	109.964	3.40341	9	109.146	4.26143	9
	-2.37227	91.9857	98.7946	98.8433	98.7705	100.626	97.0302	99.3298	90.9212		100.089	118.652	119.656	125.945	126.41	124.886	125.229	125.7		103.96	106.923	107.609	108.284	108.723	108.327	109.389	107.079		118.913					-2.37227	98.6783	3.52794	3	110.821	4.8874	4	110.541	3.65696	9	109.766	4.34176	9
	-2.30465	92.2002	96.7099	96.6772	97.3034	99.9381	96.6539	98.129	93.2259		101.376	119.834	119.324	124.505	122.407	125.105	125.072	125.643		102.991	105.495	108.726	108.528	108.137	107.709	110.044	108.939		117.269					-2.30465	98.8558	3.36027	3	109.827	5.3724	4	109.505	3.5282	9	110.058	4.26025	9
	-2.23678	91.3422	97.5679	97.4553	97.6566	100.364	94.6516	99.246	95.4306		101.004	120.525	118.344	121.272	125.672	124.035	124.415	121.331		101.631	106.683	108.468	107.254	107.631	107.348	109.421	107.772		117.663					-2.23678	97.9924	3.33002	3	110.609	5.27224	4	109.346	3.44907	9	109.295	3.91671	9
	-2.16867	91.0497	97.6246	97.7007	96.2233	99.5667	95.3571	98.7503	91.7671		101.205	118.256	118.123	123.339	124.693	124.053	124.249	121.549		102.818	106.046	107.148	106.821	108.209	105.485	108.104	106.74		117.397					-2.16867	98.3577	3.68351	3	109.831	4.92895	4	109.092	3.58188	9	108.45	4.11689	9
	-2.1008	90.8352	97.6388	96.4248	97.4324	100.316	95.5923	98.6875	93.1659		100.677	120.3	117.561	122.553	125.334	122.517	124.295	125.199		101.45	105.976	108.148	107.781	107.126	104.81	109.785	106.314		115.26					-2.1008	97.6542	3.41679	3	109.794	5.02149	4	109.186	3.5287	9	108.93	4.152	9
	-2.03293	90.2957	97.3055	97.3782	96.7056	99.6768	94.8398	98.2128	93.2925		101.116	119.739	117.638	124.24	124.186	123.816	124.674	126.163		102.096	105.689	107.968	106.632	106.885	104.706	108.145	107.489		114.68					-2.03293	97.8361	3.78079	3	109.353	4.95661	4	109.034	3.57803	9	109.037	4.32177	9
	-1.96507	90.7897	96.8163	97.7147	96.4475	98.9959	94.6046	97.6473	94.7712		99.0923	118.566	118.021	122.244	124.755	123.651	125.136	126.371		101.105	105.115	106.554	105.79	106.283	106.247	108.678	107.977		115.516					-1.96507	96.9955	3.15681	3	109.003	4.97921	4	108.534	3.55848	9	109.454	4.28536	9
	-1.89695	90.4387	96.7596	95.7028	95.7207	97.9437	94.9876	97.9894	90.6881		100.499	117.496	118.319	123.401	123.83	124.639	124.924	124.461		100.766	105.076	107.593	107.01	105.505	106.207	108.638	107.228		114.788					-1.89695	97.2346	3.3988	3	108.53	4.74366	4	108.336	3.73378	9	108.862	4.41113	9
	-1.82908	90.1722	97.5963	96.7122	96.332	99.1816	94.9473	97.4728	92.5598		99.8512	118.161	117.348	120.91	124.07	122.919	124.314	120.764		101.849	106.155	107.007	106.176	105.85	105.581	107.272	108.545		115.073					-1.82908	97.2906	3.6056	3	109.246	4.64308	4	108.176	3.46067	9	108.264	4.04366	9
	-1.76122	90.9132	97.9579	96.8454	96.0875	98.4251	95.4243	97.6124	92.9994		100.409	117.85	118.421	120.751	123.048	122.261	124.804	125.7		99.8272	104.346	105.382	105.232	105.561	104.858	107.595	106.921		114.364					-1.76122	97.0499	3.07292	3	108.63	4.56561	4	107.75	3.48713	9	108.686	4.24434	9
	-1.69337	91.2772	96.8446	96.1865	95.5169	99.3879	95.0615	98.2477	91.5273		100.826	117.332	116.505	120.645	123.154	122.224	123.87	120.509		100.428	104.455	105.867	105.861	106.283	104.192	107.765	107.094		116.117					-1.69337	97.5105	3.11874	3	108.687	4.89982	4	107.712	3.42125	9	107.832	4.01323	9
	-1.62497	91.1212	97.341	97.7147	96.2573	99.106	94.8868	97.5705	91.3608		99.8512	117.307	117.953	122.306	124.64	121.676	123.352	121.171		100.594	104.991	107.031	105.987	105.962	104.136	106.9	106.621		114.906					-1.62497	97.1887	3.04129	3	108.636	4.61299	4	108.551	3.5547	9	107.519	4.03066	9
	-1.55737	90.1852	97.3268	96.6141	94.9056	98.5077	93.7311	98.2896	93.086		99.9107	119.808	117.74	121.961	123.297	122.773	124.249	119.327		100.451	103.143	106.32	105.004	105.778	104.963	106.181	106.637		113.193					-1.55737	96.849	3.3355	3	108.368	5.028	4	107.792	3.59652	9	107.693	3.98683	9
	-1.4895	90.9457	97.4828	96.9646	95.8158	98.2257	94.6852	97.4798	95.5772		99.2113	117.203	118.438	120.362	123.279	122.032	123.592	119.866		100.165	104.09	106.367	105.767	106.299	103.694	108.121	106.874		113.882					-1.4895	96.7741	2.92718	3	108.165	4.51925	4	107.946	3.47913	9	107.991	3.80594	9
	-1.42163	90.6922	97.2063	97.3782	95.6663	98.5764	95.1891	97.5356	93.0194		100.186	117.229	118.932	120.345	124.239	121.895	124.166	123.166		99.8647	104.874	105.179	104.775	103.788	104.577	106.117	106.566		114.473					-1.42163	96.9143	3.11243	3	108.446	4.58758	4	107.653	3.5831	9	108.026	4.08206	9
	-1.35352	91.2707	97.3623	96.2496	95.1026	98.2326	95.1488	97.2633	90.1019		99.0104	118.54	117.382	121.087	123.341	122.297	125.478	123.903		99.5867	104.183	104.914	104.421	104.823	104.039	105.987	105.825		114.591					-1.35352	96.6226	2.68111	3	108.669	4.83452	4	107.284	3.57898	9	107.783	4.39007	9
	-1.2859	90.0747	96.3199	96.8314	96.4815	98.4939	94.8733	98.7224	92.9461		100.595	117.954	118.975	121.254	122.131	121.502	124.452	122.769		99.226	105.192	104.914	104.933	104.285	103.734	105.583	105.573		112.74					-1.2859	96.632	3.30236	3	108.052	4.70671	4	107.589	3.4857	9	107.795	4.05797	9
	-1.21805	89.3858	97.2275	96.9436	94.926	96.8365	94.5105	97.6822	95.5772		98.7351	118.135	118.532	123.092	123.848	121.301	124.813	123.298		99.2035	103.912	104.695	104.201	105.071	104.585	107.159	104.596		113.331					-1.21805	95.7748	3.19737	3	108.151	4.68862	4	107.572	3.80045	9	108.169	4.01396	9
	-1.14992	89.9383	96.4263	96.7333	95.0482	96.9672	94.954	96.7956	91.2209		99.6577	118.376	118.208	120.627	122.558	122.956	123.334	120.915		99.9399	104.23	106.25	104.886	104.004	104.425	106.82	105.368		112.277					-1.14992	96.512	3.28786	3	107.827	4.77848	4	107.253	3.56628	9	107.421	4.11799	9
	0	100	100	100	100	100	100	100	100		100	100	100	100	100	100	100	100		100	100	100	100	100	100	100	100		100					0	100	0	3	100	0	4	100	0	9	100	0	9
	0.0677667	98.973	98.4259	99.0606	100.815	97.8681	99.8723	98.869	99.7869		101.124	99.8533	99.2335	99.364	98.8525	97.3935	99.6487	102.439		99.9173	98.502	98.9923	98.8671	98.8525	99.2532	99.9111	97.5248		99.6653					0.0677667	100.005	0.622319	3	99.1116	0.376222	4	99.1006	0.256486	9	99.411	0.496925	9
	0.13535	97.9786	98.2628	98.633	99.9389	98.2326	98.1858	98.8062	99.627		99.8363	96.2126	96.389	97.129	97.2425	95.9941	96.9492	97.466		99.8046	96.5151	98.1173	97.8995	97.6729	98.6429	98.1254	96.2636		99.173					0.13535	99.2065	0.614041	3	97.5409	0.7072	4	97.9172	0.337698	9	97.7845	0.404324	9
	0.203233	97.9006	96.2136	97.3151	99.0015	99.2504	97.7357	98.6945	95.6638		100.923	95.16	95.2052	94.9823	95.9972	95.985	96.7736	97.3147		98.5197	96.8876	97.2737	96.8925	97.0952	97.7756	99.1839	95.5384		98.405					0.203233	99.1143	0.921656	3	96.6666	0.679827	4	97.0014	0.493891	9	97.185	0.434259	9
	0.271333	98.427	97.5821	97.21	97.2083	97.5174	96.7211	97.6543	94.4515		100.298	94.1506	93.4934	94.523	94.2003	94.2747	96.034	99.8487		99.1434	96.3986	97.0862	95.8855	95.2817	96.001	97.2689	95.0181		95.7566					0.271333	99.2893	0.544894	3	95.972	0.715199	4	95.8228	0.50492	9	96.3636	0.58724	9
	0.339217	98.31	96.4405	96.6281	98.5328	97.3936	96.0895	97.8009	94.8978		100.327	93.0722	93.6212	93.189	93.3909	93.0675	92.8631	98.1278		99.8497	94.7299	96.4612	95.2797	95.1292	95.2542	96.2023	94.5058		94.7622					0.339217	99.4957	0.608665	3	94.7512	0.687581	4	95.514	0.628969	9	95.4232	0.615419	9
	0.4068	97.8616	96.0292	96.1584	97.9826	96.1144	95.7401	97.4937	96.6296		100.61	91.8989	91.1344	93.4452	92.8394	92.6742	92.1975	96.1044		99.2411	95.312	95.8206	95.6494	94.8885	94.6198	95.0145	92.8898		94.2306					0.4068	99.2376	0.79344	3	94.3677	0.902135	4	94.8926	0.692342	9	94.8182	0.625891	9
	0.474933	97.4716	96.0363	95.5345	97.052	97.2285	95.1824	96.1812	93.6722		100.268	89.6903	91.1088	90.9806	92.1722	90.4244	92.6967	94.0715		98.0914	94.7221	96.0159	93.6512	94.6397	94.0255	93.8348	92.2277		93.3937					0.474933	98.6103	0.847905	3	93.4606	1.36765	4	94.2648	0.806857	9	93.5907	0.557945	9
	0.5428	96.4641	95.1429	94.2166	95.7479	95.5024	93.7244	96.8445	93.4657		99.9777	89.1381	90.1805	89.8057	90.3487	90.9182	91.4394	92.5019		98.2041	93.3483	95.4769	93.5725	94.736	93.9693	94.1984	92.5114		92.7931					0.5428	98.2153	1.0143	3	92.6056	1.2599	4	93.2875	0.826709	9	93.2859	0.582351	9
	0.610667	97.5236	94.6111	95.3663	96.1758	94.6015	94.2821	96.3837	94.6646		100.878	87.8785	88.1792	89.7085	89.8417	88.7507	90.1451	91.632		99.5792	94.4272	94.5004	93.9816	93.1151	94.0898	92.542	92.1725		92.1729					0.610667	99.3269	0.976525	3	92.2724	1.56601	4	92.83	0.952095	9	92.7403	0.794227	9
	0.678517	97.8941	94.4976	94.3989	95.7479	95.8875	92.8173	95.4063	92.3		100.216	87.5162	87.4468	87.7739	88.1694	88.1745	89.2484	88.5874		98.5047	92.0522	93.9614	93.4388	92.77	92.7728	92.4451	92.6297		91.2277					0.678517	98.8715	0.694877	3	91.3234	1.44657	4	92.1772	1.14508	9	91.5979	0.798868	9
	0.74665	97.5041	94.5544	94.2727	94.729	94.9178	93.2944	95.1201	92.1934		99.6949	85.4629	86.4418	87.1201	87.0397	87.0953	87.5012	91.0269		97.9336	91.5787	92.9068	92.1485	92.754	92.3392	91.7098	90.9664		90.0364					0.74665	98.3775	0.670276	3	90.4081	1.89638	4	91.37	1.16832	9	91.2496	0.857081	9
	0.814783	97.3156	94.0225	93.5296	94.5388	94.2782	93.1533	95.7624	90.5948		100.417	86.3687	85.4284	85.6095	85.99	85.4582	87.7323	88.5401		97.8058	90.8569	92.3053	90.7324	91.8312	91.3595	91.0229	90.391		88.9928					0.814783	98.5127	0.962462	3	90.0602	1.6099	4	90.4715	1.26283	9	90.446	1.00458	9
	0.882633	97.3091	93.122	93.6768	94.3078	95.1516	91.9707	94.6593	91.6539		99.4792	85.1005	85.8542	85.053	86.1679	84.8454	85.1345	88.2659		97.2423	91.633	91.2741	90.2919	91.0769	91.1025	90.6351	89.6815		88.4119					0.882633	98.0102	0.734755	3	89.5669	1.78397	4	90.3171	1.27434	9	89.7721	1.07258	9
	0.9505	97.2376	92.5902	93.6418	94.009	93.9069	91.9438	93.8006	90.7747		100.283	83.8754	83.4185	84.3728	84.38	83.8028	84.4781	84.9943		97.9336	90.4067	91.1726	90.7639	89.3757	89.906	89.4392	89.0509		88.7368					0.9505	98.4846	0.92122	3	88.9023	1.85205	4	89.449	1.44712	9	88.6878	1.16966	9
	1.01863	96.6851	93.6397	93.782	93.581	94.292	91.9102	93.291	88.3434		100.387	83.4613	83.0949	83.7986	83.5616	82.7602	84.3672	83.6895		96.1151	89.2658	89.4383	89.4737	88.7819	89.7615	88.001	89.5239		89.6229					1.01863	97.729	1.33908	3	88.9974	2.09488	4	88.8671	1.50769	9	87.9609	1.22501	9
	1.0865	96.8541	92.2782	92.3519	93.6829	93.5424	91.1644	94.017	89.9754		100.432	82.357	81.9877	82.6325	83.2859	82.5224	84.4319	82.8101		96.5585	89.1881	89.993	89.0174	88.5572	88.5249	87.2657	88.2863		87.9492					1.0865	97.948	1.24467	3	87.9431	2.0726	4	88.339	1.55195	9	87.6665	1.2893	9
	1.15435	96.4706	93.1858	92.8917	92.2497	92.1945	90.1162	93.8704	89.2893		99.7842	80.9162	81.2979	82.076	83.9619	81.0408	83.3873	85.2307		95.8822	88.1714	89.8758	88.5611	88.2764	87.6897	87.4596	86.4575		88.1658					1.15435	97.379	1.21455	3	87.6098	2.52522	4	87.9317	1.48963	9	87.1713	1.26143	9
	1.22248	96.1651	93.0157	92.2397	92.0663	92.4902	90.4388	93.0676	87.6041		99.8958	80.0966	80.2419	80.8569	82.1384	81.3883	82.13	83.1694		95.8521	87.3486	88.6962	87.499	87.5943	87.3846	86.0133	86.2447		87.0631					1.22248	97.3043	1.29889	3	86.881	2.64439	4	87.0914	1.64027	9	86.3823	1.27554	9
	1.29033	97.2116	92.1932	91.013	92.0459	92.6828	90.3783	92.5021	87.1778		99.442	79.6566	78.8792	80.689	80.4661	80.5378	81.4829	83.7935		96.1827	86.7821	89.118	87.4125	86.6073	86.6779	85.8516	87.167		87.8606					1.29033	97.6121	0.96193	3	86.6231	2.5999	4	86.546	1.76887	9	86.1743	1.28837	9
	1.35822	96.3991	91.945	91.5948	91.2784	91.7475	88.9068	92.0762	88.8497		99.6577	78.4143	79.3221	80.0088	79.6744	78.7452	80.5306	82.3657		96.1377	86.7277	87.665	85.9964	86.2542	85.7544	86.191	86.1107		86.3247					1.35822	97.3982	1.13231	3	85.8529	2.79037	4	85.9491	1.73009	9	85.5034	1.42952	9
	1.42633	96.0481	91.6117	91.3985	91.1357	91.8644	89.3435	91.6504	86.1254		98.936	77.8276	77.6955	79.417	79.2919	78.9464	80.4937	81.3729		96.04	85.5092	87.4932	85.0051	85.9332	85.3288	85.4719	84.4474		85.5174					1.42633	97.008	0.963993	3	85.1165	2.82298	4	85.4705	1.85559	9	84.7978	1.36797	9
	1.4942	96.0351	90.9665	90.9499	91.0134	91.3417	89.1621	91.9157	85.8922		98.9211	77.6896	76.9971	78.9311	79.2742	77.3459	79.976	80.938		96.0926	86.4328	86.7667	84.478	85.3956	84.8229	83.872	84.2977		84.8873					1.4942	97.0163	0.952575	3	84.994	2.75539	4	85.0164	1.85963	9	84.2469	1.50446	9
	1.56205	96.0676	90.5197	90.3049	89.6957	90.4958	89.2965	90.7498	87.6574		99.0997	76.361	76.5713	77.6855	78.438	78.3702	77.9699	81.1554		95.5891	84.9969	86.8604	84.6511	84.3043	84.3732	83.969	83.7459		84.8184					1.56205	96.9188	1.09916	3	84.174	2.92125	4	84.3341	1.85621	9	84.143	1.50535	9
	1.62992	95.5931	89.9099	90.7466	90.864	90.1176	88.0871	91.036	85.6191		98.2664	76.2057	75.8474	76.3958	77.4151	75.9466	78.1363	79.8695		95.4013	86.2853	86.9151	84.6983	83.9111	84.5499	82.9913	82.3979		84.5328					1.62992	96.4202	0.924722	3	84.2334	2.90068	4	84.1012	2.0636	9	83.1815	1.59422	9
	1.69805	95.2616	89.0874	89.9685	89.5327	89.7806	88.1543	90.4147	84.5001		100.432	74.8684	75.2598	74.9205	75.9384	76.1752	77.221	76.5129		95.3712	83.6619	85.1027	84.8792	83.0445	83.6345	83.775	83.3911		82.9182					1.69805	97.0214	1.70532	3	82.634	2.93099	4	83.1585	2.10817	9	82.6421	1.69089	9
	1.76592	95.6126	89.3994	90.1717	88.6225	90.1726	87.3681	90.5124	85.0929		99.9777	74.1179	75.0043	75.53	75.5026	74.4192	76.8605	76.3427		95.2885	84.8649	84.3372	83.9902	83.3414	83.9557	82.5953	81.4914		83.8338					1.76592	96.9596	1.51193	3	83.054	3.21464	4	82.9636	2.08603	9	82.0709	1.79167	9
	1.83377	95.6256	89.761	88.8608	88.7651	89.7325	87.3413	91.5875	84.64		98.869	73.8073	74.093	73.9223	74.6397	74.8765	76.047	77.3544		94.1163	83.8171	84.5637	82.4483	82.2099	83.9155	82.5953	82.2876		83.2726					1.83377	96.2037	1.40211	3	82.6645	3.29785	4	82.1373	2.17697	9	82.2939	1.82008	9
	1.90163	95.2226	88.2649	88.6155	89.4172	88.2745	87.1061	89.3466	83.8806		98.2292	73.1257	73.9142	73.0477	74.364	73.6967	75.3629	75.9361		95.4313	82.8314	84.384	82.4876	81.584	82.2934	82.1671	81.7437		81.5201					1.90163	96.2944	0.969274	3	81.4355	3.13115	4	81.7876	2.19745	9	81.2815	1.78295	9
	1.9695	95.2421	88.5485	88.98	88.5478	88.9416	86.7231	91.0081	83.7341		98.7054	71.9783	72.1002	72.606	73.6791	73.3126	75.1965	73.1657		95.0105	83.1186	83.4935	81.2525	82.2741	82.7993	81.0036	80.9475		82.0419					1.9695	96.3193	1.19489	3	81.4218	3.45488	4	81.3194	2.33918	9	80.8767	2.03323	9
	2.0374	95.1771	87.0737	88.4332	87.7462	87.9444	85.9773	89.4094	84.8132		99.6503	71.2363	72.1938	71.864	73.4923	72.5718	73.782	74.9149		95.251	82.2648	83.9622	81.4491	81.1587	81.2334	80.9632	80.7977		82.101					2.0374	96.6928	1.4789	3	80.6689	3.34904	4	80.916	2.28312	9	80.4959	1.92932	9
	2.10528	95.1446	88.9882	88.3	88.2285	88.1645	85.8093	88.3622	83.9606		99.0402	71.5641	71.2741	71.4929	72.2736	70.9621	72.5432	74.9527		94.6949	82.1562	83.2904	80.686	79.8588	81.6028	80.7046	81.2313		80.191					2.10528	96.2932	1.37959	3	80.7249	3.58858	4	80.3965	2.41916	9	80.0143	1.99549	9
	2.17335	94.8716	88.6124	88.4402	87.0262	87.9032	86.2595	88.3133	82.5218		97.8125	70.5375	70.3032	72.1555	72.7184	70.9987	71.9331	72.2958		94.3267	80.6504	82.4076	81.4255	79.8909	80.4545	80.6965	79.9937		81.2445					2.17335	95.6703	1.0826	3	80.2612	3.71271	4	80.2523	2.35384	9	79.2741	2.09515	9
	2.24122	93.7732	87.2509	87.0592	87.1824	88.3983	86.4476	88.816	82.675		98.5417	70.0112	70.0988	69.9735	71.8555	71.328	71.9793	73.2791		94.9354	81.2248	82.7748	80.5523	79.6903	80.4304	79.0805	80.2065		79.9646					2.24122	95.7501	1.43556	3	79.6129	3.57367	4	79.7317	2.48412	9	79.3603	2.07011	9
	2.30883	94.6896	86.0243	87.7042	87.427	87.5868	84.7679	87.6501	82.3753		98.7798	68.9846	69.7411	69.9382	69.6495	71.1816	70.8237	72.57		93.703	80.5495	82.7279	79.7262	80.1878	81.5787	78.9027	79.9543		79.7972					2.30883	95.7241	1.55413	3	78.8389	3.56583	4	79.4099	2.60904	9	78.8671	2.02834	9
	2.37695	93.9357	86.627	86.891	86.8768	87.9513	85.1508	87.1056	81.2296		99.4568	68.8379	69.2386	69.7261	69.4983	70.0018	71.1195	68.6838		95.4764	79.6957	82.1108	79.8364	79.5217	79.7238	79.4522	79.7493		78.5665					2.37695	96.2896	1.64488	3	78.4318	3.66082	4	79.0723	2.59971	9	78.024	2.20704	9
	2.44455	94.2801	86.2157	87.3116	86.6526	87.298	84.7746	86.7355	81.3761		98.1027	68.5446	68.5062	68.7986	68.7333	69.1513	70.9254	71.18		94.4319	80.6737	81.7749	80.2455	80.2038	79.8603	78.628	79.836		79.2655					2.44455	95.6049	1.24965	3	78.6749	3.69495	4	78.8361	2.7043	9	78.0519	2.09386	9
	2.51242	93.8252	86.0384	86.183	86.5915	87.1261	84.6469	86.5191	83.1013		98.2664	68.0528	67.8419	68.083	68.3597	68.383	69.3815	68.8067		94.8151	80.0373	81.064	79.1283	78.8076	79.0412	79.2421	79.4419		78.2219					2.51242	95.6356	1.34609	3	78.0876	3.73867	4	78.1317	2.71233	9	77.6182	2.34951	9
	2.58053	93.5652	86.1944	86.4143	85.8443	86.9473	85.1844	86.5471	81.3695		98.5342	67.7595	66.4963	67.5353	68.5465	67.5873	68.5588	70.5465		94.4469	80.4253	81.314	78.0662	78.7594	79.4989	78.2159	78.2595		78.8619					2.58053	95.5154	1.53071	3	78.3103	3.85419	4	77.7693	2.7756	9	77.3075	2.31895	9
	2.6484	93.4027	86.4568	85.8675	85.2466	86.6928	83.1687	86.568	80.7101		98.817	66.7242	66.3516	67.3498	67.7015	66.6636	68.8176	67.3222		94.1238	79.2611	80.5484	79.1519	78.5909	79.1857	78.0866	78.9689		78.5665					2.6484	95.4478	1.69739	3	77.7521	4.08582	4	77.5001	2.76654	9	76.6102	2.41317	9
	2.71627	94.4166	86.2015	85.517	85.6541	85.8125	83.6122	85.5487	81.1164		99.4866	66.6465	66.2323	66.8286	67.9772	66.5905	68.7621	67.4357		94.229	78.8032	80.1969	77.964	78.286	79.5391	77.1412	78.1018		77.4146					2.71627	96.0441	1.72211	3	77.2665	4.03114	4	77.1632	2.73472	9	76.4275	2.37514	9
	2.78438	94.1631	85.9463	85.545	84.9341	86.3902	82.732	85.8978	79.8641		98.192	65.7493	64.2906	65.4947	66.2516	66.1515	67.0334	69.1944		93.3799	78.5936	79.9313	77.2874	77.7323	78.4951	76.9069	78.3147		76.9322					2.78438	95.245	1.49072	3	76.8053	4.17339	4	76.4286	2.98107	9	76.0655	2.34015	9
	2.85252	93.5392	84.443	84.7739	84.0307	85.5787	82.8193	85.3183	80.0306		98.1027	64.7313	64.6227	65.583	66.5273	65.7582	66.9871	65.7905		93.0869	78.4694	81.0562	78.019	77.3792	77.5797	78.531	78.8192		76.8436					2.85252	94.9096	1.60188	3	76.1218	4.1334	4	76.3968	2.86512	9	75.7371	2.51708	9
	2.92038	93.7082	85.0812	85.1735	84.2413	86.1495	82.8798	85.5487	80.004		97.433	64.4379	64.7931	64.9117	65.9936	64.5418	65.8963	68.3718		94.4319	78.4617	80.1969	77.3818	77.3311	78.19	77.3109	77.353		76.3414					2.92038	95.191	1.1403	3	76.0806	4.30407	4	76.2414	2.94517	9	75.5663	2.50765	9
	2.98825	93.2467	84.9323	85.3488	84.2752	84.4027	82.2885	84.5783	79.3512		99.1071	64.1705	63.6689	65.3004	65.8424	64.2674	66.1921	67.2655		94.0487	78.0503	79.6266	77.0199	76.6651	78.0294	76.0666	78.1176		76.9223					2.98825	95.4675	1.83449	3	76.0188	4.32797	4	75.7944	2.91179	9	75.1285	2.46158	9
	3.05637	92.2977	84.0743	84.2692	83.2088	84.836	81.919	83.9919	79.5644		98.3631	63.2473	63.8903	63.7809	65.2642	64.0113	65.6189	65.0151		94.6423	77.5691	78.7048	77.1064	76.5046	76.873	76.5029	77.8259		75.5243					3.05637	95.101	1.76589	3	75.1038	4.3522	4	75.285	2.91981	9	74.5914	2.55567	9
	3.12397	93.2077	83.9254	84.2482	83.9696	84.9254	82.4363	84.4178	79.1581		97.5818	63.2991	62.6895	63.5512	64.597	63.9382	64.5373	64.5518		94.2591	77.3052	78.861	77.2245	76.1515	76.7044	76.3494	76.6908		75.6227					3.12397	95.0162	1.31824	3	75.0381	4.30377	4	75.1353	3.06494	9	74.3093	2.64987	9
	3.19183	93.4222	84.0247	84.1851	83.956	85.3861	82.3087	82.8051	80.2504		98.2738	62.1776	62.5532	63.0919	63.6719	62.8315	64.4356	64.3816		93.2898	77.1577	78.6814	77.0514	75.9429	77.2023	75.509	77.7708		76.0264					3.19183	94.9952	1.63973	3	74.8466	4.5778	4	74.9466	3.15375	9	74.1661	2.68964	9
	3.25995	93.0972	83.1809	83.414	82.9507	84.1208	82.349	83.2379	79.1647		98.0506	61.3752	62.1615	63.2509	63.4496	62.3468	64.7499	63.3321		94.2741	76.0711	78.0095	76.0601	75.4133	77.2424	75.8242	77.4712		75.5637					3.25995	95.1406	1.49413	3	74.0477	4.568	4	74.3145	3.02673	9	73.9687	2.74562	9
	3.32757	94.0461	84.0176	84.6057	82.8692	84.1345	81.8719	83.0006	77.8858		97.2991	61.2976	61.6675	62.076	62.7468	62.42	63.5389	63.7481		94.4995	76.6455	77.8377	76.3669	75.8305	76.8008	75.5252	76.8564		75.7606					3.32757	95.2816	1.01721	3	74.4303	4.75273	4	74.2372	3.20141	9	73.5164	2.69499	9
	3.39543	92.7722	82.9823	83.5121	82.9846	84.3477	81.9526	82.6655	79.8908		97.9464	61.0991	61.0373	61.758	61.457	61.1213	63.3632	62.5851		92.6736	76.5135	77.0877	74.8722	74.7151	75.9817	75.3555	75.9735		75.4258					3.39543	94.4641	1.74142	3	74.0052	4.61398	4	73.5302	3.25389	9	73.2099	2.85379	9
	3.4633	93.0907	83.0107	83.2737	83.3243	84.0726	81.4755	82.8679	78.079		98.1994	60.8662	60.3304	61.4488	61.6527	60.5908	63.1598	63.8994		93.688	75.978	78.0095	75.234	74.3861	76.6964	75.1697	76.0129		74.8449					3.4633	94.9927	1.6126	3	73.6749	4.63585	4	73.5258	3.30608	9	73.1057	2.77887	9
	3.53142	93.6757	83.0462	83.6102	82.5092	83.6944	80.5752	82.7772	77.5395		97.4554	60.7454	60.2197	60.3975	61.6794	60.5634	61.9026	63.871		93.6504	76.4592	77.2752	75.5251	75.0281	75.6203	74.6849	74.1526		74.5397					3.53142	94.9272	1.26412	3	73.6976	4.68589	4	73.3265	3.32393	9	72.4096	2.7453	9
	3.59928	92.3107	82.8405	82.783	82.6314	83.4399	80.1183	82.3932	77.0532		96.9196	59.3046	59.7939	60.159	61.6438	59.7037	61.6622	63.0673		92.9967	75.0233	77.1034	74.5889	74.3781	76.1744	75.3151	75.4375		74.589					3.59928	94.0757	1.43571	3	72.9393	4.92445	4	72.9468	3.30604	9	72.325	2.82991	9
	3.66715	92.0312	81.8975	82.7129	82.7877	83.158	80.4408	81.9045	77.706		97.2024	59.2097	59.8365	59.6996	60.8166	59.9872	61.5882	61.129		92.4406	75.5123	76.7987	74.0933	73.688	75.4115	75.6464	75.7764		73.4764					3.66715	93.8914	1.6597	3	72.524	4.78686	4	72.6213	3.34736	9	72.1767	2.91479	9
	3.73527	93.5912	81.7557	81.9909	81.7009	84.162	80.1922	81.7509	77.253		97.6339	58.7007	58.8826	59.3993	60.3096	58.6519	61.2832	62.6513		92.4932	75.2251	76.2284	74.7778	74.7874	74.9297	74.8788	76.1154		73.6143					3.73527	94.5728	1.56305	3	72.3239	4.87024	4	72.471	3.41711	9	71.9674	2.89637	9
	3.80313	92.5382	81.7486	82.2783	81.7348	83.323	79.7756	82.1488	77.2797		97.433	58.0537	58.2439	59.0459	59.8203	59.3196	60.5713	61.7057		92.4707	75.1785	75.291	74.88	73.6479	74.6487	75.1293	76.1154		74.2542					3.80313	94.1473	1.64298	3	72.3087	5.03602	4	72.0295	3.4477	9	71.8549	2.93983	9
	3.871	92.5512	81.55	81.9769	81.3341	83.2405	79.8428	80.2011	77.273		97.8646	57.8121	58.4739	58.8958	60.016	58.4324	60.4696	59.9943		92.8539	74.7749	75.5488	73.3853	73.367	74.3917	74.1677	75.5163		72.8266					3.871	94.4232	1.72289	3	71.7409	5.00512	4	71.8042	3.38982	9	71.1432	2.96721	9
	3.93912	92.0962	80.919	82.2292	80.8654	83.3024	79.7218	80.8573	77.1864		97.5893	57.7603	58.2695	58.2244	59.5713	58.6611	59.1939	60.9871		92.869	74.2083	75.2597	73.22	73.7763	74.0946	73.6991	75.3035		73.4863					3.93912	94.1848	1.71679	3	71.5935	4.90527	4	71.6354	3.45169	9	71.0783	2.97846	9
	4.00673	92.7007	81.3728	82.2923	81.3137	82.3327	80.0443	81.3739	76.6336		98.1176	56.9321	57.4093	57.6237	58.7351	57.7282	59.0644	60.8548		92.5684	75	75.8534	72.5907	73.0942	74.5925	73.4809	74.1447		72.5903					4.00673	94.4622	1.82808	3	71.4738	5.18918	4	71.2495	3.54787	9	70.8797	3.05391	9
	4.07458	92.8112	80.4722	81.7245	80.4986	82.3396	79.2582	80.9481	76.6469		98.311	57.605	56.8813	57.447	57.7922	57.6184	58.7871	60.0794		91.5915	73.4865	75.2129	73.3774	73.7041	73.8938	74.192	74.7596		72.9645					4.07458	94.2379	2.06676	3	71.1321	4.82286	4	70.9975	3.57849	9	70.6871	3.06944	9
	4.14272	92.7267	80.848	81.4581	80.9129	82.539	79.4732	79.7543	76.6136		98.0878	56.6043	56.8642	56.8728	58.1391	57.2252	58.0198	59.7107		92.373	73.3468	74.2754	73.1807	72.8294	74.2954	72.7376	73.4432		71.8322					4.14272	94.3958	1.84881	3	70.6578	5.08227	4	70.7858	3.58237	9	70.1414	3.07056	9
	4.21057	92.7007	80.3588	81.388	80.0842	82.3465	79.023	79.6844	76.7335		97.0536	56.2937	55.953	56.1926	57.4809	56.6764	57.8904	59.2946		91.6291	73.5874	74.1583	73.2909	72.3399	74.1669	73.2304	74.6413		73.2795					4.21057	93.7944	1.65866	3	70.8798	5.12913	4	70.3594	3.65327	9	70.149	3.13681	9
	4.27843	93.4222	80.2312	81.7455	79.7718	82.1883	78.9357	79.6495	76.9		97.6562	55.6035	55.5527	56.2014	57.1518	56.6581	57.3357	57.621		92.0123	74.1152	74.127	73.1414	72.3319	72.7776	74.1273	73.183		71.9307					4.27843	94.3636	1.6959	3	70.4701	5.25765	4	70.2458	3.68555	9	69.6876	3.21931	9
	4.34657	92.9412	79.1534	82.1521	79.8669	81.2668	78.1428	79.7333	76.174		97.4405	55.4482	55.6634	55.6007	56.6269	55.5972	57.2432	56.2216		92.3279	74.2937	73.5802	72.5356	72.4121	73.4843	72.6972	73.7348		71.8322					4.34657	94.2365	1.61173	3	70.1819	5.14134	4	69.9672	3.70574	9	69.2254	3.30644	9
	4.41468	92.9347	80.1957	79.6285	80.2133	81.3011	78.1227	79.119	75.5945		97.4851	55.7588	54.8799	55.53	56.4668	55.8716	56.7995	56.25		93.4551	73.4477	73.5646	72.3389	71.9467	73.8135	71.9134	73.183		71.5566					4.41468	94.625	1.43795	3	70.2397	5.17079	4	69.5411	3.66278	9	68.963	3.25324	9
	4.48255	93.0777	79.9121	80.1332	79.6087	81.2393	78.3243	79.1329	75.9875		97.8571	54.5855	54.2667	55.7067	56.7159	55.4052	55.8658	56.0136		92.4031	72.5396	73.7677	72.3153	71.6418	72.2075	73.2062	73.1279		71.4876					4.48255	94.446	1.71667	3	69.6312	5.35394	4	69.4884	3.66956	9	68.8079	3.35225	9
	4.55015	92.9477	79.3874	80	79.4865	80.8541	78.425	78.9514	74.3822		96.8006	54.9651	54.4456	55.106	56.0843	55.0302	55.6254	58.0087		92.8389	71.7712	73.7677	71.6151	70.8153	71.9666	72.4063	73.1042		71.0938					4.55015	94.1957	1.30282	3	69.3044	5.13623	4	69.1305	3.68157	9	68.6556	3.22287	9
	4.61802	93.1232	79.0612	80.2243	78.8887	80.5103	77.686	79.4261	75.4479		97.5372	54.0592	53.7046	55.0442	55.5506	55.2588	56.0229	57.8385		92.5158	71.8643	73.0646	71.3319	71.377	73.2354	71.9295	72.647		71.0643					4.61802	94.392	1.58232	3	69.0122	5.29875	4	68.8551	3.71423	9	68.8325	3.22124	9
	4.68588	91.9532	78.8201	79.1027	79.1876	80.132	77.7867	79.2656	74.9484		96.8601	53.9039	54.65	53.8428	55.3727	54.6552	55.8565	56.3256		91.7794	72.1826	72.4553	71.9692	71.2566	72.882	71.5659	72.1425		70.3653					4.68588	93.5309	1.66537	3	68.818	5.29298	4	68.6632	3.68173	9	68.3809	3.30239	9
	4.75375	91.9467	78.4443	79.1237	78.5355	80.2627	78.1697	78.7699	75.2082		98.0804	53.0929	53.1426	53.6131	54.6433	54.0424	55.3573	55.0775		91.9071	72.2446	72.1194	71.3398	71.5455	72.2316	71.8003	72.0006		71.0643					4.75375	93.9781	2.05118	3	68.7115	5.45196	4	68.2584	3.78471	9	68.0731	3.41833	9
	4.82187	92.2197	78.3238	79.3761	78.7121	80.469	77.0006	78.372	74.7752		97.7009	52.8341	53.3555	53.5071	54.8212	53.7589	54.8858	54.5197		90.9002	71.8566	73.1662	71.6151	71.3288	72.6813	70.4509	72.7495		70.7492					4.82187	93.6069	2.08212	3	68.4409	5.46381	4	68.4835	3.81256	9	67.6882	3.41688	9
	4.88973	92.3432	78.5861	78.5279	78.0397	80.4965	77.7935	78.2533	74.3089		97.8125	52.7651	52.3846	53.5336	53.905	53.3016	54.2664	55.2477		90.3968	71.158	72.5568	70.915	71.1443	71.9425	71.3882	72.0479		69.8041					4.88973	93.5175	2.2198	3	68.0783	5.4572	4	67.9448	3.83461	9	67.6167	3.43633	9
	4.9576	91.6932	78.3167	78.647	78.3861	80.1527	76.6781	77.6808	75.428		97.8199	52.6443	52.5294	52.9505	53.8961	53.2102	54.0261	56.3351		91.1031	70.7467	72.2834	70.97	71.0319	71.7417	71.1054	71.709		70.1388					4.9576	93.5387	2.14736	3	67.9616	5.43403	4	67.8719	3.85479	9	67.546	3.35374	9
	5.02547	92.8307	78.5081	78.9345	78.2163	79.0798	76.4362	78.5325	73.8227		96.7783	52.1439	51.814	52.9594	54.1452	52.9907	53.7765	53.5836		91.7944	70.7389	70.8382	70.7497	70.8875	71.4687	71.5013	71.0941		69.7056					5.02547	93.8011	1.51834	3	67.7741	5.56809	4	67.5138	3.81643	9	67.0229	3.48947	9
	5.09358	92.0572	78.1819	78.612	77.4691	79.4925	76.8461	78.1486	74.2956		96.7262	52.4545	51.9247	52.4293	53.1133	51.9115	53.9706	55.191		90.9453	70.9717	72.3303	70.2541	70.6708	71.4045	70.5398	71.8745		69.7056					5.09358	93.2429	1.77098	3	67.8285	5.45403	4	67.3662	3.88047	9	67.1313	3.46987	9
	5.16145	92.6032	77.6998	77.7778	76.8374	79.0386	76.537	77.6459	74.5154		96.5923	51.9282	51.1157	52.1555	53.1133	51.7011	52.8797	54.7088		91.817	70.8864	72.1897	70.2541	70.727	71.8943	70.4186	71.8036		69.8533					5.16145	93.6708	1.47826	3	67.5919	5.50369	4	67.0232	3.86362	9	66.9005	3.5432	9
	5.22932	91.9727	77.7565	77.4834	78.2163	78.5503	76.3153	77.4574	73.5896		97.247	51.3761	51.4478	52.2173	52.882	51.6462	52.8058	52.9123		90.9528	70.2344	70.721	71.1588	70.1332	71.3081	70.9842	71.5907		69.8041					5.22932	93.3908	1.95044	3	67.2928	5.61093	4	66.9789	3.85463	9	66.5122	3.59127	9
	5.29717	91.6997	76.4376	77.932	77.3061	78.9423	75.8987	77.4853	73.0767		96.131	50.8757	50.9113	51.6254	52.713	51.6005	52.5654	53.9429		91.5089	70.9019	71.2132	69.9237	69.2264	71.2358	70.5317	70.8103		69.5875					5.29717	93.1132	1.50989	3	66.9507	5.56007	4	66.6437	3.90477	9	66.3497	3.50233	9
	5.36503	92.3952	77.8345	78.0582	77.0072	78.5297	76.2145	76.7174	74.3223		98.0804	50.8671	50.8772	51.7049	52.0281	51.2072	52.5839	52.7042		91.2609	70.3741	71.0569	69.5933	68.7129	71.1154	70.3701	71.5513		69.6662					5.36503	93.9121	2.10967	3	67.1855	5.74467	4	66.3965	3.902	9	66.3096	3.61185	9
	5.4329	92.6487	76.8134	77.3992	76.7898	78.8942	75.5224	76.8151	73.5896		96.8155	50.4271	50.2896	51.0512	51.3343	51.2896	52.5099	53.385		90.0586	70.3198	70.6195	69.908	69.2425	70.9227	70.4186	70.6448		68.3765					5.4329	93.1743	1.96816	3	66.4842	5.64814	4	66.1698	3.98758	9	66.122	3.5118	9
	5.50102	92.4927	77.1751	77.9671	75.3159	78.9767	75.556	77.1712	73.856		96.5179	50.0992	51.0049	50.8392	51.4321	50.5945	51.5947	53.4607		91.584	69.2797	70.3461	69.8608	69.6277	70.5051	70.1438	71.0705		68.219					5.50102	93.5315	1.51604	3	66.1932	5.72457	4	66.1523	3.93005	9	65.9947	3.61917	9
	5.56863	91.3162	76.6504	76.8735	75.8253	77.6357	75.2536	77.227	74.5287		97.7381	50.1424	50.3321	50.0088	51.2542	51.006	51.5485	52.8461		91.1181	69.6135	70.3617	70.3643	69.2666	69.678	70.1034	70.6842		68.4749					5.56863	93.3908	2.1744	3	66.2203	5.656	4	65.7691	3.93887	9	65.8751	3.61953	9
	5.6365	91.6607	77.6076	77.4834	75.5876	77.8763	75.1797	76.7872	73.7095		95.8705	49.5902	49.2506	49.5318	50.507	49.8994	50.7997	52.2882		91.4488	69.5359	70.4711	69.31	68.8814	70.0634	69.8933	70.7709		69.0164					5.6365	92.9933	1.4399	3	66.4375	5.95016	4	65.4332	4.07051	9	65.4879	3.70891	9
	5.7046	91.0042	76.5298	76.8314	74.6909	77.6081	74.9916	76.8361	73.4963		97.0759	48.9863	48.978	49.5848	50.5248	50.2652	50.9383	53.1014		90.6748	69.3806	70.1976	68.8695	69.066	69.3407	69.1742	69.3363		67.2344					5.7046	92.9183	2.08097	3	65.5328	5.86247	4	65.1501	4.00528	9	65.2756	3.58027	9
	5.77247	91.3617	76.2036	77.8619	74.9151	78.1583	75.2671	76.2566	72.9035		96.183	49.0726	49.5316	51.2014	50.7205	49.8079	51.2249	50.9077		90.4043	68.9227	69.7446	69.8529	68.2074	69.4612	69.3681	69.4624		67.8744					5.77247	92.6497	1.78817	3	65.5183	5.78633	4	65.5771	3.95075	9	64.9622	3.6754	9
	5.84035	91.4267	75.6718	76.0533	74.82	76.9136	74.4272	75.9145	72.9901		96.8824	48.7447	48.5863	48.9488	49.9555	49.4147	50.5223	52.014		90.3442	69.2332	69.3696	68.7751	68.7851	69.5816	68.6571	69.3836		67.8645					5.84035	92.8844	2.02328	3	65.3786	5.79996	4	64.6897	4.01513	9	64.7672	3.62491	9
	5.90847	90.9977	76.6858	76.8174	75.214	77.1336	74.3399	76.0821	72.8702		96.5327	48.3479	48.7311	49.1431	49.6709	48.5641	49.9676	51.598		89.8858	69.5048	70.2758	69.4674	68.1432	69.7984	68.9318	69.8565		67.6479					5.90847	92.4721	2.05555	3	65.5466	6.05504	4	64.9551	4.08241	9	64.6676	3.74312	9
	5.97607	92.7397	75.764	75.9271	74.82	78.007	74.4339	76.2497	73.3431		95.8408	48.8741	48.6544	48.7191	49.7865	48.7745	50.2912	50.6997		90.3968	68.7675	69.518	68.6413	68.095	68.618	69.1419	69.0604		67.6184					5.97607	92.9924	1.57662	3	65.256	5.7496	4	64.6854	4.06727	9	64.5125	3.75253	9
	6.04393	91.3487	75.3244	76.4178	74.3173	76.047	74.3936	75.1885	71.8377		97.2396	48.6067	47.8113	48.242	49.8399	48.8202	49.2928	51.0968		90.0436	68.3173	69.4165	69.5303	68.2154	70.2803	68.9156	68.9579		67.2049					6.04393	92.8773	2.21344	3	64.8633	5.7091	4	64.4264	4.0701	9	64.3093	3.7178	9
	6.1118	92.3172	74.8422	76.2776	74.2019	76.4734	73.7419	75.377	72.1042		96.8601	47.951	47.5047	48.189	49.5997	48.0062	49.6163	50.6051		90.4794	68.2242	68.604	68.5391	68.5765	70.1036	69.3035	69.021		67.5298					6.1118	93.2189	1.89633	3	64.6368	5.8009	4	64.2184	4.08617	9	64.2088	3.76816	9
	6.17967	91.8492	75.0762	76.2285	74.8268	75.9026	73.7553	76.0821	71.8511		97.4702	47.7439	47.8879	48.3922	49.3862	48.2806	49.6533	49.2814		90.9754	69.109	69.5571	68.1693	68.6888	68.7786	68.9156	69.2023		66.5846					6.17967	93.4316	2.03502	3	64.6284	5.903	4	64.3377	4.07297	9	63.9778	3.81227	9
	6.24753	90.8807	75.8207	75.6817	74.2155	76.4322	74.2794	75.7819	72.4306		96.1905	47.6749	47.5643	48.0389	48.7191	47.0459	49.5147	47.986		90.239	67.5567	68.8696	67.6029	68.8012	68.9794	68.3581	68.6505		66.4074					6.24753	92.4367	1.886	3	64.3649	5.94524	4	63.9917	4.10541	9	63.6696	3.9681	9
	6.3154	90.7897	75.3031	75.6397	73.937	76.2258	73.6948	75.1745	72.717		96.7708	46.9675	47.4791	47.8799	47.9897	47.4758	49.302	48.2886		90.6522	68.488	69.1118	68.0749	67.6296	69.5897	68.0349	68.6662		67.3132					6.3154	92.7376	2.01701	3	64.518	6.10952	4	63.7742	4.1303	9	63.6604	3.90697	9
	6.38352	91.4657	75.1897	76.7893	74.4736	76.6866	74.098	74.8953	73.6362		96.7634	46.9157	46.4657	47.6413	47.9007	47.0093	48.3683	49.3287		90.547	67.1298	68.8306	68.4368	68.1993	68.2486	68.4874	68.414		66.9391					6.38352	92.9254	1.93724	3	64.0436	6.02431	4	63.936	4.29644	9	63.6095	3.94073	9
	6.45138	91.4527	75.2322	74.7704	73.9913	75.7582	74.2861	75.0698	72.3506		96.4807	46.7777	46.4486	47.394	48.2654	46.6709	48.5624	47.7496		90.0511	67.9137	67.8775	67.8231	68.1432	68.6983	68.3177	68.6899		65.8265					6.45138	92.6615	1.95198	3	63.9375	6.06499	4	63.3858	4.13134	9	63.3773	4.01385	9
	6.51925	91.0887	74.7571	75.0158	73.4139	75.6207	73.7822	74.5462	71.558		96.8527	46.6569	47.0533	47.3322	47.625	46.6435	48.3313	49.3287		90.0962	68.6278	68.6196	68.13	67.2364	69.0918	68.4147	68.3036		67.3033					6.51925	92.6792	2.10632	3	64.3363	6.11266	4	63.3385	4.12158	9	63.3333	3.88369	9
	6.58737	91.1927	74.1686	74.9527	73.8622	76.7691	73.1573	75.5236	71.951		97.0685	46.3894	46.3805	46.5813	47.7673	46.7898	47.4346	48.9221		91.306	67.3937	68.2994	66.9263	67.0759	67.3412	69.1984	66.5064		65.9447					6.58737	93.189	1.93998	3	63.4741	5.97024	4	63.1794	4.22966	9	62.9805	3.93158	9
	6.65497	91.4202	74.5302	74.2797	73.6721	75.937	73.1237	75.0419	71.6512		96.5774	46.0357	46.0399	46.1396	47.0379	46.7441	47.4993	46.9365		90.3968	66.959	67.3932	66.9184	67.3247	68.4574	67.841	67.3971		65.9348					6.65497	92.7981	1.91259	3	63.365	6.0861	4	62.7492	4.22951	9	62.7436	4.00844	9
	6.72283	91.2317	74.3601	74.9527	73.8962	75.153	72.6668	75.7959	71.7312		96.5104	45.8373	45.6055	46.2544	47.0023	46.2411	47.4161	48.0427		89.9609	67.8749	68.1509	67.2488	66.8673	68.0238	68.9641	67.6021		66.7126					6.72283	92.5677	2.00521	3	63.6962	6.18613	4	62.7924	4.26118	9	62.9426	4.01873	9
	6.79095	90.9587	74.4168	74.6372	73.2102	75.2149	73.117	74.4624	72.1641		96.6369	45.4404	45.844	45.8834	47.3136	45.9301	46.9446	48.1373		90.4268	67.6032	67.4947	66.7768	66.2333	68.9553	68.245	68.0041		66.1219					6.79095	92.6741	1.98732	3	63.3956	6.25161	4	62.512	4.19163	9	62.8844	4.04089	9
	6.85882	90.9912	74.2608	74.7143	73.4819	75.0499	72.1897	74.7696	71.8577		96.6295	44.9659	45.9036	45.318	46.6109	46.0948	47.0556	48.0806		90.4268	66.4079	67.9166	66.9971	67.108	68.1282	68.148	67.4602		65.6887					6.85882	92.6825	1.98019	3	62.8308	6.2634	4	62.5667	4.28364	9	62.6427	3.97139	9
	6.92668	91.6672	74.197	74.8055	73.6177	75.098	72.8079	74.5392	72.0109		95.3943	45.2679	45.3415	45.2827	46.0505	45.4637	46.7505	47.9009		89.3748	67.1763	67.9713	67.359	67.0839	67.7507	67.5824	66.7744		65.8462					6.92668	92.1455	1.75407	3	63.1219	6.22685	4	62.5122	4.36165	9	62.3979	4.0219	9
	6.99455	90.7572	73.6155	73.9923	73.0539	75.5381	72.4451	73.7573	71.2183		96.3467	44.7934	45.3756	45.4682	45.9616	45.7381	46.7597	47.4092		89.8106	67.1996	67.6197	66.0294	66.6747	67.8551	67.8491	66.9399		65.7773					6.99455	92.3049	2.03932	3	62.8465	6.25451	4	62.1904	4.29071	9	62.2191	3.9693	9
	7.06268	91.4397	73.6368	74.3498	73.4615	74.424	72.1024	73.506	71.8111		96.5625	44.4224	44.4132	45.318	46.3619	45.0247	46.9539	45.5938		90.2615	67.2152	67.3072	66.3284	66.8031	68.0318	67.542	67.3971		65.3736					7.06268	92.7546	1.93411	3	62.662	6.33255	4	62.0852	4.31451	9	61.9959	4.10054	9
	7.13053	91.3422	73.6652	74.1045	73.3596	74.5891	72.4115	74.0226	71.6379		97.0908	44.6812	45.1541	45.1855	45.837	44.7686	46.4177	47.1539		90.0135	66.4002	66.5495	66.3205	66.105	67.7106	67.7279	67.0661		65.7281					7.13053	92.8155	2.17177	3	62.6187	6.2433	4	61.9116	4.2784	9	62.1019	4.0773	9
	7.1984	90.3347	73.963	73.7399	72.5309	73.8189	72.5795	73.5269	71.1317		94.7693	44.2757	44.4813	44.9382	45.5791	44.3662	45.9924	46.5961		90.1713	66.0587	66.8073	66.7217	65.6636	67.4376	67.5986	66.7823		65.8659					7.1984	91.7585	1.50618	3	62.5408	6.37385	4	61.5868	4.27096	9	61.779	4.10961	9
	7.2668	90.4907	74.1473	73.0459	72.3679	74.706	71.4708	73.0801	70.5455		96.2798	44.2412	44.3366	44.6731	45.4012	44.0644	45.9185	44.5821		90.0135	65.8336	66.5807	66.5565	66.4259	68.08	66.7421	67.2868		65.1177					7.2668	92.2613	2.01393	3	62.3349	6.36985	4	61.566	4.31136	9	61.3078	4.17045	9
	7.33465	91.6672	73.6297	73.6909	72.8841	74.4034	71.6858	72.9964	71.8111		96.2649	44.4655	44.0555	44.2933	44.734	44.3479	45.7428	47.3903		89.0367	66.2993	66.7526	65.4315	66.4901	67.55	67.1865	67.3656		64.6746					7.33465	92.3229	2.1122	3	62.2673	6.2454	4	61.4151	4.40024	9	61.7863	4.0593	9
	7.40252	89.9773	72.6158	73.4104	72.7347	73.922	71.9344	73.3454	70.3923		96.8304	44.2326	43.2976	44.5406	44.9119	44.3205	45.5764	46.3975		90.3216	65.5542	66.2448	66.4228	66.0969	67.6544	66.7986	65.3949		64.8912					7.40252	92.3764	2.22919	3	61.8234	6.11856	4	61.2869	4.38426	9	61.3127	4.05835	9
	7.47038	90.7962	73.0057	73.9012	72.9249	73.365	71.8135	73.9738	70.5922		96.9866	43.2318	43.8171	44.0724	44.6095	44.1924	45.3915	45.3101		89.7656	66.0354	66.8073	65.5259	65.4149	66.5302	67.2592	65.8915		64.6155					7.47038	92.5161	2.25496	3	61.7221	6.43032	4	61.1598	4.38661	9	61.2171	4.15467	9
	7.53825	90.9782	73.7361	73.1441	72.6532	73.6125	71.6321	73.3734	71.3115		96.4137	43.5251	43.6297	43.4276	44.5028	44.5034	44.8738	44.5253		89.8933	65.7482	66.6745	66.116	65.0056	66.6586	66.2977	67.3577		65.0684					7.53825	92.4284	2.0171	3	62.0195	6.47121	4	60.974	4.4087	9	61.1704	4.2103	9
	7.6061	90.3997	72.4669	73.109	72.1505	73.8601	71.585	73.0732	71.2449		97.1205	43.344	43.4764	43.6307	44.7696	44.1101	45.0032	44.5253		89.9985	65.5852	65.9792	65.5417	65.134	66.8433	66.7744	65.9073		64.3497					7.6061	92.5063	2.31005	3	61.4364	6.28959	4	60.8501	4.36343	9	61.0074	4.19476	9
	7.67423	90.1072	72.9277	73.4665	72.232	73.2412	71.4574	73.0662	70.6255		95.8854	43.0679	43.1272	43.4452	44.5383	42.8754	45.1234	45.1683		89.7806	65.1506	66.5495	66.1396	65.4149	66.5542	66.435	66.7192		65.1373					7.67423	91.9244	1.98275	3	61.5709	6.43475	4	60.9061	4.42002	9	60.8916	4.20284	9
	7.7421	90.3217	72.7576	73.0529	72.1166	73.7432	71.7396	72.8707	70.7387		97.2619	43.3008	43.3401	43.2332	43.8979	43.2596	44.5965	43.1827		89.6378	65.9034	66.5807	65.0696	65.5914	67.3412	65.8937	65.9546		65.6887					7.7421	92.4072	2.43539	3	61.9126	6.4174	4	60.7362	4.44005	9	60.6197	4.31367	9
	7.80997	89.9968	72.6158	73.13	72.0283	73.8326	71.3767	72.5077	70.4056		96.6443	43.1024	42.8717	43.2862	43.9246	42.8206	43.7922	45.225		90.6823	65.2903	66.0339	65.6754	65.463	66.4418	66.6209	65.4974		64.1134					7.80997	92.4411	2.11091	3	61.2805	6.34452	4	60.694	4.46233	9	60.5209	4.22195	9
	7.87783	91.4072	72.6299	72.2748	71.8652	74.1421	71.2894	72.6682	70.8919		97.128	42.6365	42.2586	43.3392	43.6755	43.287	44.3746	45.0359		89.5927	65.267	65.1746	66.0137	65.7679	66.3374	66.0149	65.1348		64.5072					7.87783	92.7093	2.27058	3	61.2602	6.47244	4	60.5013	4.4787	9	60.5593	4.1731	9
	7.94568	89.8668	72.3038	72.2538	72.4018	72.9592	70.7787	72.0399	70.3124		96.1979	42.3001	42.1223	42.6943	42.9461	42.8114	44.467	44.8468		89.3147	65.0419	66.2604	65.5731	64.9173	66.5061	66.9926	65.2609		63.6605					7.94568	91.7931	2.20816	3	60.8266	6.45986	4	60.2365	4.52733	9	60.4462	4.16823	9
	8.01355	89.4898	71.8854	72.7305	71.5528	73.5782	71.3095	72.0679	70.5189		96.2351	42.7314	42.1904	42.712	43.1062	42.5919	44.0603	44.4781		89.2771	65.4998	64.6356	65.164	65.447	67.0923	66.2977	65.5053		65.029					8.01355	91.6673	2.28472	3	61.2864	6.37957	4	60.1241	4.5016	9	60.4358	4.25048	9
	8.08167	90.6987	72.4881	72.0365	71.0977	72.9248	70.5167	71.8026	69.6863		95.9524	42.4554	42.0882	42.2438	42.8482	42.3541	43.8199	43.3812		89.8632	64.6383	65.2996	65.6203	64.3316	66.9718	65.6997	65.4028		63.7491					8.08167	92.1714	1.90579	3	60.8327	6.43276	4	59.8323	4.47767	9	59.9595	4.25465	9
	8.14953	89.9058	72.247	71.6859	71.3286	73.0761	70.9131	72.6682	69.7862		96.3393	42.0757	42.2926	42.5442	42.8838	42.0157	42.9324	42.9368		88.8789	64.6461	64.9637	65.5967	65.0618	66.4739	65.9745	66.4039		63.8771					8.14953	91.708	2.33456	3	60.7115	6.4927	4	59.9371	4.45448	9	60.0117	4.40935	9
	8.2174	89.8538	71.85	71.9033	71.2811	73.0417	70.6914	71.8654	69.9594		96.064	41.6875	41.6283	41.917	42.9995	42.6011	43.2652	42.2466		89.3222	64.6926	64.7293	65.0618	64.9575	66.0082	65.1988	64.7328		64.3005					8.2174	91.7467	2.16412	3	60.6326	6.54906	4	59.7244	4.50994	9	59.6188	4.30835	9
	8.28553	90.4517	71.5592	71.9664	71.94	72.7804	70.678	71.7746	69.0935		95.7738	41.791	41.5176	41.5371	43.2041	41.7139	42.8307	42.7383		89.3297	64.6538	64.62	65.3056	64.5402	65.7352	65.3361	64.8747		63.6999					8.28553	91.8518	1.98759	3	60.426	6.45371	4	59.7124	4.53847	9	59.4194	4.32142	9
	8.35338	90.3217	71.4245	71.9173	71.4101	73.0968	69.8246	72.6822	69.1401		96.131	41.6444	41.8157	41.811	42.6348	41.6408	43.2467	43.6744		89.5176	64.1493	65.0184	64.7235	64.8451	65.7673	65.627	65.0323		63.5818					8.35338	91.9901	2.0834	3	60.2	6.43774	4	59.6969	4.52914	9	59.6262	4.27225	9
	8.42125	90.7767	72.1974	72.2117	71.6818	73.4475	70.4629	71.8375	70.046		96.1235	41.515	41.6539	41.6784	42.617	42.2352	42.8122	42.7383		90.7725	65.0342	64.4325	64.6448	64.5402	65.8315	64.7705	64.6145		64.2513					8.42125	92.5576	1.78297	3	60.7494	6.65609	4	59.6564	4.56683	9	59.4832	4.30624	9
	8.48938	89.3793	71.616	72.1977	71.2403	73.0555	70.0867	71.9631	69.5397		95.558	41.0146	41.1599	41.6519	41.7275	41.4304	42.7568	42.3695		89.1719	64.3123	65.2762	64.4953	64.5563	65.43	65.3927	64.4648		63.5325					8.48938	91.3697	2.095	3	60.1189	6.62316	4	59.4845	4.62102	9	59.2704	4.35023	9
	8.55725	89.7758	71.928	71.1111	71.1656	72.0308	69.9456	71.3139	70.0127		95.8557	40.7816	40.7511	41.0336	42.3145	41.3024	42.1189	42.1048		89.7505	64.2425	65.7058	64.4481	64.139	65.7753	65.2311	65.1742		63.247					8.55725	91.794	2.03085	3	60.0498	6.70916	4	59.1889	4.5635	9	59.2199	4.40763	9
	8.6251	89.9903	71.8358	71.6579	70.9754	72.2578	70.4025	71.4465	69.4065		96.5253	41.0232	40.9555	40.9629	41.5762	40.9091	42.1374	43.211		88.4656	63.7613	65.0262	64.3616	63.8742	65.1249	64.9725	65.0481		63.0403					8.6251	91.6604	2.47196	3	59.9151	6.60534	4	59.072	4.59876	9	59.1843	4.35189	9
	8.69297	90.2957	71.0771	70.8938	71.5664	73.1243	69.4954	71.5094	69.1734		96.0491	40.5314	40.9981	40.8127	41.3627	40.9457	42.0264	42.5019		89.7355	64.2269	64.7137	63.7558	63.6334	64.7234	65.4735	64.3781		63.4932					8.69297	92.0268	2.01766	3	59.8322	6.65634	4	58.9846	4.62709	9	58.9141	4.34598	9
	8.7611	90.1917	71.0842	71.2303	70.8056	72.4297	69.8045	71.4186	69.0468		96.3244	40.9369	40.6064	40.6625	41.5495	40.7902	41.934	41.8589		89.5326	64.3356	64.6434	64.157	63.7297	65.3417	65.021	64.6697		64.2316					8.7611	92.0163	2.16246	3	60.1471	6.60099	4	58.8682	4.60837	9	58.8762	4.40491	9
	8.82895	90.1397	71.2969	70.8517	71.5324	71.9001	69.7373	71.1044	69.9927		96.8229	40.3416	40.2146	40.9452	41.3627	40.8908	42.1744	41.8022		89.1268	64.5141	63.9559	64.0154	64.0427	65.0285	64.8352	64.0312		63.7393					8.82895	92.0298	2.41431	3	59.973	6.76035	4	58.7579	4.6075	9	58.8441	4.38581	9
	8.89683	90.6467	70.6445	71.3985	71.1792	72.244	69.7306	71.1044	69.0535		96.4137	40.9283	40.7511	40.6272	41.3005	40.0768	41.5457	42.0953		89.5852	64.1183	64.3778	63.9053	63.9705	64.7475	64.9725	64.5751		63.119					8.89683	92.2152	2.12149	3	59.7025	6.47669	4	58.8616	4.62305	9	58.6557	4.42525	9
	8.96495	90.3932	71.6585	71.9313	70.4252	72.0102	69.0721	71.2231	69.1867		95.5729	40.0052	40.1209	40.2562	41.3361	40.3878	41.2684	41.0269		88.6835	63.4974	64.6278	63.5355	63.7859	64.9482	64.7382	64.0627		63.5818					8.96495	91.5499	2.07118	3	59.6857	6.83361	4	58.6699	4.65616	9	58.4349	4.45587	9
	9.03255	89.9708	70.6445	71.3074	70.4524	72.1477	70.3756	70.8741	68.9602		95.878	40.0656	39.891	40.2915	41.4339	39.7293	41.1574	42.048		88.5107	63.412	64.0966	64.0154	64.139	64.8759	64.0595	64.0549		62.6563					9.03255	91.4531	2.25221	3	59.1946	6.62565	4	58.6417	4.64818	9	58.4594	4.45617	9
	9.10067	90.2957	71.7011	70.8517	71.3218	72.1477	69.7776	71.0765	68.9403		96.5774	39.6601	40.1891	40.0442	40.749	39.8665	41.3886	41.6698		88.7887	63.8078	63.6122	64.0233	63.5612	65.0767	64.6978	63.4085		62.0951					9.10067	91.8873	2.38507	3	59.316	6.87777	4	58.5	4.67928	9	58.4336	4.44618	9
	9.16853	89.6588	70.5878	70.5223	70.5679	72.4778	69.6903	70.4831	69.9127		96.6518	39.8413	39.3034	40.159	40.5266	39.8025	41.1112	41.6131		88.4205	63.5051	63.3544	63.6063	63.7859	65.1329	63.8736	63.976		62.6465					9.16853	91.577	2.56244	3	59.1452	6.6761	4	58.256	4.70009	9	58.3995	4.47054	9
	9.23645	91.2317	71.226	70.9218	70.5407	71.3362	69.6365	70.4622	68.021		95.5655	39.8413	39.38	39.9647	40.1085	39.9854	40.3716	41.6698		89.217	63.3188	63.8778	63.8345	63.168	64.7394	64.5362	63.3375		62.5086					9.23645	92.0047	1.87296	3	59.2237	6.75336	4	58.1258	4.69831	9	58.0844	4.42478	9
	9.30427	89.6263	70.1978	70.2979	70.2214	72.1202	69.8448	70.0154	68.9802		95.3795	39.4013	39.0819	39.5141	40.3665	39.4549	40.5658	40.0908		89.0592	62.9851	64.6512	63.2602	62.5662	65.0526	64.7463	64.3702		62.0459					9.30427	91.355	2.01889	3	58.6575	6.67203	4	58.0089	4.71891	9	58.1245	4.57884	9
	9.37213	88.7293	71.1763	70.0105	70.3709	71.6044	69.3341	70.1271	69.3199		95.5357	39.2805	38.9882	39.8587	39.477	39.3452	39.9556	41.3105		88.9089	62.9618	63.9872	63.7873	62.5662	65.1409	64.116	63.3375		62.0459					9.37213	91.058	2.23947	3	58.8661	6.84364	4	57.85	4.7229	9	57.9985	4.52263	9
	9.43998	89.7173	71.6443	70.8307	69.8071	72.134	69.8179	70.8531	68.3874		95.4539	38.9699	38.9031	39.1343	40.0996	39.3909	40.2515	41.197		88.0373	63.2412	63.5888	63.5906	63.3606	64.3379	64.52	63.2981		62.5578					9.43998	91.0695	2.2452	3	59.1033	7.02192	4	57.9387	4.76682	9	58.006	4.51412	9
	9.50838	90.4062	69.9	70.375	70.398	71.5494	68.4271	70.3156	67.7679		96.6667	39.0475	38.7839	38.9134	40.1441	38.8879	40.2607	39.9017		88.7136	62.9773	63.4091	63.3703	63.16	64.7475	63.9544	63.2272		61.9671					9.50838	91.9288	2.41879	3	58.473	6.71083	4	57.7893	4.75388	9	57.4989	4.5175	9
	9.57598	90.8807	69.8362	70.7536	70.5203	71.2675	68.5883	70.0433	69.2999		96.1384	39.5048	38.5113	39.0813	39.9306	38.6226	40.5935	39.2965		89.8257	63.0161	63.7763	63.0714	62.7909	64.5628	64.5685	62.9671		61.9573					9.57598	92.2816	1.9523	3	58.5786	6.59325	4	57.7448	4.77423	9	57.6158	4.59874	9
	9.64385	89.8018	70.5878	71.0831	69.2637	71.3225	69.1998	70.4622	69.0002		97.567	38.4954	38.5113	38.9841	39.6816	38.8056	39.1791	40.7905		88.4055	62.9385	64.0028	62.678	62.4378	64.7234	63.9625	63.8341		61.1499					9.64385	91.9247	2.84977	3	58.2929	6.90924	4	57.5516	4.75556	9	57.773	4.61714	9
	9.71172	89.4898	69.2831	71.2233	68.9173	70.456	67.997	70.141	68.9203		95.744	38.6938	38.5198	38.7014	39.9395	39.0068	39.3917	40.4501		89.187	62.3021	62.956	62.8589	62.9674	64.6752	63.2838	63.4164		62.0557					9.71172	91.4736	2.13702	3	58.0837	6.67687	4	57.3933	4.70936	9	57.4758	4.53528	9
	9.77957	89.7433	70.3326	70.0666	69.9701	71.1093	68.884	70.0084	68.6738		95.6696	38.4091	38.2729	38.6131	39.4592	38.33	39.5396	40.2137		89.3598	62.2866	62.8076	63.0556	63.0396	64.7796	63.7928	63.0853		61.8293					9.77957	91.5909	2.04238	3	58.2144	6.88446	4	57.3771	4.77274	9	57.4786	4.60008	9
	9.84745	88.7358	69.7866	69.8563	69.5829	70.8961	68.8638	69.9106	68.3208		96.5551	37.9691	38.1962	38.3657	38.9521	38.5861	39.5858	39.2871		89.2471	63.1947	62.8388	62.8904	62.6785	64.1853	64.2696	62.6675		62.0853					9.84745	91.5126	2.52553	3	58.2589	6.97355	4	57.1397	4.7786	9	57.2974	4.60596	9
	9.9153	89.8863	70.9565	69.6109	69.1075	71.6526	68.4203	69.8129	68.1076		94.8065	37.926	37.8215	38.5866	38.7031	38.1928	39.6413	38.9467		87.8043	61.8131	63.2372	63.213	62.1971	64.4262	63.5747	62.7385		61.8194					9.9153	90.8324	2.07598	3	58.1288	7.07048	4	57.1255	4.81078	9	57.0957	4.61001	9
	9.98317	89.6913	70.1836	70.2559	69.7256	70.4078	68.9847	69.6663	68.3807		96.0714	38.1589	37.8811	38.2862	39.2012	38.0648	39.0681	39.0507		89.3222	61.588	62.417	62.4105	63.2723	63.2619	63.809	63.0459		61.9376					9.98317	91.695	2.19082	3	57.967	6.89495	4	57.0953	4.784	9	57.0369	4.65173	9
	10.051	88.4563	70.5382	69.0151	68.7882	70.8342	68.5211	68.7029	68.4473		95.4911	37.8138	38.06	38.3039	38.4362	37.9733	38.9295	40.2515		88.0147	62.077	63.3388	63.3782	62.2292	63.8561	63.6959	62.5099		61.5044					10.051	90.654	2.42188	3	57.9833	7.03319	4	56.9315	4.76643	9	56.9875	4.55217	9
	10.1189	89.2558	69.4675	69.5759	68.761	70.731	68.595	70.1131	68.021		96.1086	37.3825	37.7363	37.818	38.4273	37.6715	38.8925	38.975		88.7812	61.6501	63.0263	62.9297	62.2212	63.6875	64.3746	62.9119		62.0656					10.1189	91.3819	2.36735	3	57.6414	6.98763	4	56.803	4.81229	9	57.0269	4.69676	9
	10.1867	89.2493	69.8787	69.9124	68.9988	70.7173	68.4943	69.4429	68.5739		96.2128	38.1244	37.1317	37.7032	38.285	38.083	39.4194	38.6063		88.7436	62.1779	62.3545	62.088	62.1409	64.5708	64.6332	62.163		60.953					10.1867	91.4019	2.40988	3	57.7835	6.84429	4	56.5924	4.85301	9	57.1096	4.66709	9
	10.2546	89.0478	69.7228	70.1577	68.8561	71.3775	68.5682	69.6314	67.7346		95.5432	37.3652	37.3446	37.7208	38.5074	37.2233	38.2176	37.708		89.5476	61.5259	63.0888	62.8117	62.1489	63.3663	63.203	63.8184		61.4945					10.2546	91.3795	2.08681	3	57.5271	6.99385	4	56.8904	4.8843	9	56.6079	4.78539	9
	10.3228	89.7628	69.6802	69.5969	68.9444	71.3431	68.884	69.8688	68.6139		95.2455	37.3825	36.9613	37.3057	38.116	37.3239	38.3748	39.6653		88.2176	62.1546	62.4404	62.1194	61.828	63.0852	63.6231	61.4615		61.4847					10.3227	91.0753	2.13229	3	57.6755	7.01483	4	56.5172	4.90198	9	56.7667	4.67939	9
	10.3906	88.3783	69.5526	69.3305	69.2637	71.0543	68.2792	69.408	68.4074		96.0268	37.2099	37.4297	37.7032	38.2049	37.0953	38.0882	39.3154		89.7054	62.1313	62.6748	62.5993	62.1008	63.5429	62.9606	61.9502		61.3173					10.3906	91.3702	2.35962	3	57.5528	7.02948	4	56.7068	4.85538	9	56.5608	4.68302	9
	10.4585	89.1908	69.6944	68.3771	68.7746	70.6416	68.1113	69.1846	67.668		96.5402	37.417	36.8591	37.5972	38.2227	37.4977	38.1622	38.4739		88.8563	62.7911	62.4639	63.0556	61.6434	63.4867	63.7443	62.7148		61.337					10.4585	91.5291	2.5074	3	57.8099	7.03779	4	56.4039	4.8215	9	56.5604	4.68839	9
	10.5263	88.9698	69.51	69.1623	68.6524	70.676	67.735	68.7168	67.668		95.4688	36.7872	36.8591	37.2968	38.1338	37.3971	38.2823	38.2375		88.165	61.5958	62.0733	62.1352	61.8681	63.8962	63.1707	62.2418		62.3511					10.5263	90.8678	2.31215	3	57.561	7.1505	4	56.3174	4.84789	9	56.3717	4.65854	9
	10.5942	89.1128	69.51	68.8608	68.238	70.2703	68.5682	68.7308	68.2675		94.9926	37.0805	36.544	36.7933	37.3688	37.1593	37.9495	38.7292		88.1049	61.9528	62.9795	62.0565	61.6033	63.3743	62.3061	62.1709		61.2484					10.5942	90.7367	2.14771	3	57.4479	7.04192	4	56.0794	4.90195	9	56.3618	4.68544	9
	10.6621	89.2428	69.1839	69.1693	68.6116	70.3184	67.9433	69.024	67.8212		96.2946	36.6923	36.808	37.182	37.9826	37.3788	38.4118	37.6418		88.3003	62.0537	62.1201	62.025	61.5391	63.4706	63.0899	62.502		60.4608					10.6621	91.2792	2.52242	3	57.0977	7.06122	4	56.1951	4.84291	9	56.3648	4.70266	9
	10.7302	88.8723	70.0773	69.0431	68.7678	70.4903	68.1785	69.3102	66.8954		95.6771	36.3989	36.2545	36.5548	37.9648	37.2233	37.8756	38.663		87.7066	61.4328	62.7139	61.136	61.2181	63.1414	62.8798	61.8714		60.9137					10.7302	90.752	2.48542	3	57.2057	7.24693	4	56.0159	4.90898	9	56.2265	4.652	9
	10.798	88.8138	69.2902	69.4427	68.6184	69.8783	68.0978	68.5493	67.335		96.3914	36.744	36.5525	36.8993	37.4311	36.7843	37.9865	38.6252		88.6234	62.077	62.2529	61.8205	61.6033	63.2378	62.4111	61.9265		60.9826					10.798	91.2762	2.55819	3	57.2735	7.08691	4	56.0554	4.89434	9	56.1059	4.64944	9
	10.8657	88.6123	69.5171	68.2159	68.0954	70.1602	67.3386	69.0031	67.6081		95.8705	36.7354	36.3482	36.6784	37.52	36.8667	37.7739	38.4739		87.5639	61.9295	62.3936	62.3476	60.7607	63.2057	62.201	61.3117		61.5438					10.8657	90.6822	2.61175	3	57.4314	7.13871	4	55.8356	4.86006	9	55.9758	4.64939	9
	10.9335	87.9623	69.4533	68.3631	69.1007	69.8095	68.0172	68.8914	67.6214		95.5357	36.2954	36.0075	36.5459	37.4222	36.5831	37.7461	38.9656		88.3378	60.6722	62.2061	61.6081	61.2582	63.2217	62.7747	62.1157		60.5395					10.9335	90.6119	2.46427	3	56.7401	7.12687	4	55.8135	4.90999	9	56.2152	4.68609	9
	11.0014	88.4368	68.5173	68.9029	68.5505	70.0089	67.997	69.1497	66.7954		96.5997	36.2954	36.0501	36.6431	37.0486	36.1899	37.8109	36.9138		89.217	61.0835	61.9014	61.7733	60.9854	62.226	62.6697	62.3128		60.5198					11.0014	91.4178	2.6007	3	56.604	7.01051	4	55.7627	4.92245	9	55.785	4.7779	9
	11.0695	87.9493	68.6521	68.8889	68.3603	70.3803	67.1437	68.4027	67.8012		95.625	36.2091	35.7776	36.1396	36.8084	36.199	37.5612	38.1997		87.5038	60.8584	61.503	61.3406	61.0255	63.31	62.5404	61.5482		60.4312					11.0695	90.3594	2.63596	3	56.5377	7.03466	4	55.5805	4.97196	9	55.8562	4.70373	9
	11.1374	88.6838	69.1555	68.1879	68.1225	70.0433	68.5682	68.4306	67.315		95.3497	36.1142	36.1523	36.5724	37.0841	36.0984	36.7754	37.8593		88.8263	61.3552	61.8389	60.782	61.3946	62.3464	62.1768	61.0594		60.0079					11.1374	90.9532	2.19861	3	56.6582	7.13862	4	55.5754	4.86816	9	55.6255	4.76972	9
	11.2052	89.3338	69.0137	68.7206	68.3399	69.1699	67.9164	67.9	67.3616		95.878	35.6915	35.4199	36.1396	36.8173	36.0984	37.0343	36.5261		88.2326	60.905	62.0264	61.0731	60.7366	62.5311	63.1303	62.4231		60.8349					11.2052	91.1481	2.38619	3	56.6113	7.23264	4	55.3826	4.93647	9	55.6579	4.83247	9
	11.2731	88.2028	68.6946	68.7697	68.2652	69.5482	67.1504	69.0799	67.1351		96.183	35.8036	36.0756	36.2279	36.6305	35.9429	37.0251	36.4599		87.1431	60.9904	61.7374	61.1596	60.4558	62.8041	62.7586	61.4851		60.0571					11.2731	90.5096	2.85315	3	56.3864	7.12865	4	55.43	4.91118	9	55.5379	4.83577	9
	11.341	89.0218	68.9073	68.1949	68.7475	69.0255	67.5536	68.0955	67.2817		95.7961	35.3378	35.5135	35.7509	36.5415	35.7783	37.173	36.961		87.9997	60.6954	61.753	61.3878	61.2903	63.3261	62.2899	61.6033		60.0768					11.341	90.9392	2.44632	3	56.2543	7.25681	4	55.3561	4.96601	9	55.5625	4.79558	9
	11.4088	88.0663	68.6095	67.9215	67.8101	69.2318	67.8358	68.5912	66.8287		94.9628	35.2084	35.5646	35.8481	36.7283	35.5954	36.7385	36.1952		88.5482	61.1068	61.1827	61.1675	60.5039	62.6034	62.6858	61.4851		59.6731					11.4088	90.5258	2.22287	3	56.1495	7.25014	4	55.1065	4.88542	9	55.3955	4.87422	9
	11.4767	88.0793	69.2902	67.9986	67.9867	69.9195	66.9623	67.9838	67.0819		95.8929	35.5534	35.3943	35.8216	36.3903	36.2082	36.267	36.9989		87.3835	60.2841	60.8546	60.6247	60.865	62.7238	61.5708	60.8939		59.7913					11.4767	90.4519	2.72789	3	56.2298	7.22961	4	55.095	4.94267	9	55.1878	4.74781	9
	11.5448	88.5798	67.9926	68.0827	67.6878	69.3831	66.922	68.5074	67.295		94.0104	35.217	34.6704	35.3004	36.1679	35.4582	36.7385	36.5166		87.2858	60.9128	60.4875	61.2776	60.7366	62.8122	62.9121	61.3747		60.1162					11.5448	89.9587	2.06002	3	56.0596	7.1695	4	54.866	4.99624	9	55.393	4.85288	9
	11.6127	88.2873	68.7868	67.8654	68.1701	69.7957	67.4528	67.9489	66.3758		95.3423	35.217	35.3177	35.4329	36.4348	35.9063	36.7015	36.1762		86.6246	60.9438	61.6514	60.3257	60.8089	62.3464	61.7566	60.8151		59.2006					11.6127	90.0847	2.67223	3	56.037	7.24635	4	55.0892	4.97088	9	55.0533	4.77159	9
	11.6806	88.5473	67.8934	68.7767	68.0274	69.5069	66.9892	68.5423	66.7488		95.5134	35.3895	34.7726	34.894	35.9989	35.3759	36.2023	37.0934		87.639	60.9749	60.5187	61.2147	60.4076	61.7763	61.8859	62.8725		59.7125					11.6806	90.5666	2.48727	3	55.9926	7.09915	4	54.902	5.05887	9	55.2763	4.82887	9
	11.7484	88.4173	68.6237	68.251	67.2123	68.8054	67.2915	67.6766	66.3558		95.0818	35.1566	34.7215	35.3799	36.1057	35.0009	36.0081	36.8949		88.3303	60.1056	60.9093	60.6955	60.3113	61.9289	61.9829	61.5797		60.3328					11.7484	90.6098	2.23615	3	56.0547	7.24236	4	54.7102	4.94876	9	54.9688	4.81496	9
	11.8163	89.0218	68.2266	68.3141	67.1172	69.3831	67.6141	67.3904	66.7089		94.9405	34.5354	35.0792	34.8057	35.9989	34.7997	36.2947	36.7436		87.639	60.7808	60.9015	60.3886	61.0014	62.3063	61.9505	60.9727		59.7716					11.8163	90.5338	2.23923	3	55.8286	7.34383	4	54.7766	4.99457	9	54.9757	4.82806	9
	11.8842	88.3133	67.8792	67.3186	67.8305	69.0599	67.3856	67.7255	67.255		95.5506	34.5009	34.5256	35.371	35.6342	34.69	35.9064	35.902		88.135	59.8572	60.9093	60.1448	60.2472	62.8684	61.5385	60.9648		60.2934					11.8841	90.6663	2.4427	3	55.6327	7.28066	4	54.5601	4.9732	9	54.9151	4.92654	9
	11.9523	88.0793	67.9997	67.5289	67.7965	68.7298	66.7473	67.8791	66.3292		95.5952	34.7856	34.8833	34.788	35.8833	35.0192	35.0929	36.5166		87.9471	60.711	60.6359	61.0416	61.0095	62.3063	61.8536	60.8939		58.0093					11.9522	90.5405	2.52763	3	55.3764	7.18052	4	54.6996	4.98811	9	54.7376	4.86463	9
	12.0201	88.4758	66.7447	67.8584	67.484	69.5619	66.7137	68.3049	65.9162		95.8482	34.8546	34.466	34.5848	35.1539	34.8271	35.6568	35.8831		87.4512	59.5622	60.55	60.3493	60.6163	62.3143	62.1202	60.6417		59.5156					12.0201	90.5917	2.64484	3	55.1693	6.9813	4	54.5138	5.07494	9	54.7087	4.88082	9
	12.0877	88.4498	67.0779	67.8724	67.0765	68.5785	67.2378	67.914	67.0619		95.3125	34.3974	34.4234	34.5936	35.5631	34.6076	35.5274	36.3654		87.4361	60.253	60.5968	60.2549	60.3675	61.9128	61.7647	61.3432		59.5747					12.0877	90.3995	2.47388	3	55.3258	7.17892	4	54.3696	4.9968	9	54.8594	4.91301	9
	12.1559	89.2948	67.9855	68.5314	67.4569	68.0421	66.8346	68.3538	66.2293		95.2232	34.6648	34.4575	35.053	35.572	34.9369	35.9896	35.3536		87.9246	59.5234	60.5734	60.5932	60.7928	61.6558	61.6516	60.9727		60.4903					12.1558	90.8142	2.23972	3	55.666	7.25129	4	54.5636	4.99984	9	54.6642	4.88419	9
	12.2237	88.9503	68.5102	67.5149	67.5044	68.998	67.0631	67.8721	68.0077		95.6845	34.1213	34.1935	34.523	35.2428	34.5802	35.2593	34.9943		88.0072	60.1056	61.0812	59.9481	59.3966	62.0654	61.3526	61.1146		59.1809					12.2237	90.8807	2.4173	3	55.4795	7.42223	4	54.2669	5.03798	9	54.701	5.01963	9
	12.2916	88.4628	67.3757	67.7392	67.5588	67.9871	66.277	67.2787	65.9495		94.9182	34.0782	34.0232	34.1078	35.2517	34.6534	35.2408	35.8642		87.8569	59.7175	60.2844	59.9874	60.2311	61.2061	61.6193	60.9097		59.8405					12.2916	90.4126	2.25954	3	55.253	7.28189	4	54.1301	5.03947	9	54.3332	4.83286	9
	12.3595	88.3068	67.1417	66.9891	67.7014	68.4341	66.754	67.4602	66.1893		95.2307	34.1989	33.8699	34.6731	34.976	34.2052	34.7878	35.4482		86.9101	59.8261	59.925	60.0504	59.9904	61.5354	60.9405	61.1304		59.7913					12.3595	90.1492	2.57252	3	55.2395	7.22337	4	54.0677	5.01803	9	54.2723	4.93381	9
	12.4271	88.4823	67.0141	67.2766	66.7436	68.6198	67.0698	67.3415	66.1427		94.933	34.3542	33.4866	33.8781	34.8514	34.2967	35.1946	36.0628		88.15	59.6864	60.4875	59.7593	59.541	61.1901	61.4092	60.7835		58.4917					12.427	90.5218	2.20772	3	54.8866	7.09865	4	53.8493	5.06968	9	54.3879	4.875	9
	12.4949	88.6253	67.7941	68.286	66.2818	68.1177	66.0821	66.8319	66.4091		95.4092	33.7762	33.9976	34.5053	34.8248	34.3607	34.8063	34.5499		86.9176	59.6787	60.0187	59.539	60.191	61.1098	61.2799	59.9559		59.4368					12.4949	90.3174	2.59321	3	55.1715	7.39141	4	53.9735	5.01013	9	53.9317	4.91031	9
	12.5628	87.8388	67.3757	67.1994	67.1512	68.3378	66.4584	67.3694	66.489		95.2827	33.2931	33.8699	34.1166	34.8159	34.1321	34.7324	35.6278		87.0379	58.887	60.0109	60.3808	59.5892	61.8646	61.2233	59.2543		58.7083					12.5628	90.0531	2.625	3	54.566	7.37369	4	53.9413	5.04068	9	54.1279	4.90879	9
	12.6306	88.6058	67.1134	67.8794	66.6418	68.7298	66.4651	67.6627	66.0361		94.8735	34.337	34.0487	33.6926	34.8692	34.0498	35.1484	34.8147		87.8344	59.5622	60.339	60.1212	60.5922	61.7201	61.1345	60.752		58.6295					12.6306	90.4379	2.22896	3	54.9105	7.116	4	54.1015	5.09202	9	54.1981	4.94992	9
	12.6985	88.1508	66.9928	66.6386	67.1376	68.1521	66.2837	67.0762	65.9095		94.9777	33.7244	33.4781	33.7986	34.2911	33.8577	34.5105	35.921		87.4286	59.539	59.9719	59.5862	59.7657	61.5514	60.4476	60.0662		59.2104					12.6985	90.1857	2.40504	3	54.8667	7.27287	4	53.6467	5.068	9	53.9582	4.87553	9
	12.7664	88.5408	67.787	66.8559	66.0168	68.3928	66.3979	67.5161	66.2559		95.997	33.4656	33.5973	33.8251	34.2199	33.6108	34.7231	34.7296		87.9847	59.3604	60.3468	60.1054	60.0546	61.3989	60.9971	61.2329		58.2652					12.7664	90.8408	2.58309	3	54.7196	7.39706	4	53.7128	5.06192	9	54.0958	5.00167	9
	12.8342	88.9633	67.3686	66.919	67.2123	68.4478	66.7137	67.16	66.1627		94.3824	33.6813	33.4781	33.7191	34.3355	33.3364	33.9928	35.1267		87.5939	59.4303	59.9563	60.3572	59.4929	60.3871	61.0052	60.2002		58.728					12.8342	90.3132	2.07266	3	54.8021	7.30775	4	53.7687	5.10303	9	53.7872	4.99184	9
	12.9024	89.1518	66.7234	67.0312	66.7504	68.8742	65.4841	67.146	65.6364		94.2113	33.6813	32.8905	33.4629	34.1309	33.5742	35.0005	34.2095		88.135	58.8327	59.9484	60.129	59.4929	60.7243	61.3122	59.6484		59.2202					12.9024	90.4993	1.87905	3	54.6144	7.21012	4	53.6345	5.1609	9	53.6373	4.91508	9
	12.9702	88.9633	66.6099	67.2555	66.1595	68.3516	65.5782	66.7411	64.7905		94.4792	33.388	33.1375	33.6837	34.0509	33.5467	34.3811	35.2402		87.9321	60.09	59.6125	59.4524	59.3564	61.0777	61.4334	59.8297		58.5508					12.9702	90.4582	2.03242	3	54.6597	7.30253	4	53.4511	5.08634	9	53.6243	4.86778	9
	13.0381	88.1118	67.5388	67.1153	66.0033	68.3034	66.0754	67.1111	65.8163		94.814	32.8099	33.0949	33.083	33.873	33.5193	34.3718	34.531		87.4361	59.702	59.8703	59.0984	59.3163	61.1419	60.7547	59.8061		59.0135					13.0381	90.1206	2.35477	3	54.7661	7.56978	4	53.3064	5.1163	9	53.6808	4.95891	9
	13.1059	88.0728	66.7305	67.0172	66.2953	68.4685	66.324	67.0483	66.0161		94.2932	33.5088	33.1545	33.1979	33.7395	33.1169	34.2979	34.2946		88.8037	58.8792	59.6985	59.1063	58.6583	60.4674	60.4476	59.5381		58.2652					13.1059	90.3899	1.963	3	54.3459	7.20808	4	53.2596	5.11401	9	53.5057	4.98745	9
	13.1738	88.0923	66.5532	66.6246	67.1648	68.0215	65.8671	66.4689	66.5623		95.3348	33.1637	33.1119	33.1625	33.4015	33.437	33.9743	34.4648		87.6315	58.7162	59.5813	58.8152	59.1237	61.0616	61.2718	59.609		58.344					13.1738	90.3529	2.49452	3	54.1943	7.26119	4	53.223	5.13601	9	53.6352	4.98973	9
	13.2417	87.9233	66.8368	66.6176	66.4652	67.8977	65.3296	67.2368	65.6698		94.3973	33.0601	32.8905	33.1184	33.6951	32.7511	34.1315	34.5499		87.4512	59.2984	59.2454	59.8458	59.9262	61.3908	61.2476	60.2081		58.5015					13.2417	89.9239	2.24085	3	54.4242	7.36478	4	53.3002	5.12899	9	53.6128	5.01204	9
	13.3095	87.6828	67.0425	65.8254	66.2342	67.1618	66.156	66.3153	66.589		95.5357	32.7927	32.5754	32.5883	33.6328	32.623	33.8726	34.0582		88.2702	58.8171	59.3469	59.4603	60.5842	61.4149	59.8255	60.7914		57.9108					13.3095	90.4962	2.52543	3	54.1408	7.40651	4	53.0455	5.12158	9	53.5162	5.06981	9
	13.3774	88.7683	66.9999	66.7227	66.438	67.9802	64.7719	67.0274	65.8096		94.8586	32.8099	32.5583	32.5795	33.2236	32.5773	33.8356	33.3964		87.5338	59.5002	59.636	58.9489	59.5811	60.4272	60.1325	59.2622		58.1668					13.3774	90.3869	2.26408	3	54.3692	7.44472	4	53.0743	5.19341	9	53.0267	5.01849	9
	13.4453	88.0403	66.4043	66.6526	66.9474	67.9527	66.1426	66.5945	65.1635		94.3229	32.6719	33.0267	32.9859	33.446	32.5407	33.697	33.7273		88.443	59.3527	59.1438	59.8301	59.4688	61.158	60.2295	59.5538		57.3496					13.4453	90.2688	2.03041	3	53.9446	7.35195	4	53.2727	5.15312	9	53.2008	5.04084	9
	13.5134	87.8128	66.1136	67.2976	66.8999	67.8083	65.5647	66.8947	65.057		95.1711	32.9393	32.5158	32.5	33.6328	32.7968	33.6322	33.8313		88.6985	59.3527	59.1985	59.421	59.6533	60.8046	60.6577	59.3016		58.8363					13.5134	90.5608	2.31929	3	54.3105	7.31406	4	53.2141	5.21131	9	53.1712	5.00836	9
	13.5813	88.3718	67.1347	66.5825	66.5195	68.2553	65.8537	65.8545	66.0694		95.6622	32.7668	32.5072	32.4823	32.9924	32.6504	33.623	32.829		87.7442	59.4225	59.425	60.1526	59.549	60.917	60.5123	59.3962		58.8658					13.5813	90.5927	2.5412	3	54.5474	7.50138	4	53.1629	5.23916	9	53.0784	5.07947	9
	13.6491	88.0013	66.9999	66.9471	66.4787	68.5304	66.3307	66.6085	65.9628		94.628	31.8609	32.1751	32.7385	33.6061	32.8059	33.3919	33.8975		87.2858	59.0577	59.4563	59.4288	58.4978	60.8769	60.2214	59.2149		58.0782					13.6491	89.9717	2.33728	3	53.9992	7.64498	4	53.0954	5.20533	9	53.2567	5.05572	9
	13.7172	88.7228	66.5532	65.7273	66.078	67.6295	65.081	66.3781	65.0969		96.0491	32.3182	32.2858	32.2968	33.2503	32.6596	33.0313	34.4837		87.0905	58.4756	59.8078	59.5311	59.549	60.3308	60.1002	59.4829		58.0388					13.7172	90.6208	2.75476	3	53.8465	7.43827	4	52.9062	5.17285	9	52.9605	4.96202	9
	13.7851	88.0078	67.1488	66.9821	65.3512	68.0627	65.4572	65.9243	65.5698		94.5461	32.1715	32.1495	32.5177	32.939	32.5681	32.9666	34.3419		87.6841	58.3126	58.6985	58.9883	59.4608	60.4513	60.4072	59.9164		58.1668					13.7851	90.0793	2.23535	3	53.9499	7.55715	4	52.7944	5.1926	9	53.067	5.0074	9
	13.853	88.3198	66.2767	66.1059	66.3497	67.1068	65.6386	66.9436	65.39		94.8438	32.275	32.0644	32.553	32.7166	32.1749	33.1885	33.472		87.0905	58.9568	59.1907	59.2322	59.0595	59.9534	60.0598	59.3962		58.6197					13.853	90.0847	2.40586	3	54.0321	7.46435	4	52.7087	5.17727	9	52.913	5.07476	9
	13.9208	88.7878	66.2838	65.531	66.5263	67.5882	65.39	66.1477	65.1036		94.6949	32.4303	32.0133	32.0671	32.9924	32.5224	32.7355	34.0488		87.346	58.3514	59.8156	59.1771	59.4929	59.8972	59.5507	59.3725		58.8658					13.9208	90.2762	2.24822	3	53.9828	7.40918	4	52.8004	5.21502	9	52.7521	4.98963	9
	13.9887	87.4683	66.8439	65.9516	66.2342	67.6157	65.9007	66.2175	65.4433		94.4494	32.0162	32.2006	32.2792	33.3037	32.1474	32.7448	32.952		87.3986	58.6386	58.9329	58.7837	58.6102	60.6199	60.6577	58.3478		58.1569					13.9887	89.7721	2.33874	3	53.9139	7.56649	4	52.6569	5.14442	9	52.7812	5.12058	9
	14.0566	88.9113	66.7447	65.9376	65.9625	67.9114	65.1347	65.3868	64.9903		94.7173	32.0507	32.1155	32.1996	32.3608	32.6687	32.9574	33.0371		87.3384	59.3216	59.6282	58.8152	59.1558	59.5921	59.9144	59.546		57.0838					14.0565	90.3223	2.24388	3	53.8002	7.53805	4	52.6763	5.22714	9	52.5808	4.98688	9
	14.1244	88.8788	66.4752	65.7764	65.8267	66.8386	65.5379	66.5666	65.057		93.8616	31.6625	31.6897	32.2173	32.7433	31.5347	32.828	32.6778		87.1957	58.3903	58.8157	58.4848	58.7225	60.7564	59.4699	59.2701		58.2062					14.1244	89.9787	2.00134	3	53.6835	7.58925	4	52.3461	5.14843	9	52.6331	5.14702	9
	14.1923	87.7283	66.3759	66.197	65.555	67.4713	65.8469	65.9592	65.2967		94.814	31.8523	31.7493	31.8286	32.7255	31.9371	33.2994	33.7179		87.3986	57.8314	58.3861	58.8939	58.7386	60.9893	59.3407	58.5527		57.261					14.1923	89.9803	2.41873	3	53.3302	7.45656	4	52.3939	5.1981	9	52.7711	5.03067	9
	14.2604	88.2808	66.2554	65.6011	65.8402	67.0105	65.1414	65.4496	64.7905		94.4643	31.7315	31.5619	31.8375	32.7344	31.681	32.7448	33.4626		87.6616	58.0487	58.5189	58.6657	58.3373	60.379	60.2052	59.4435		57.5367					14.2604	90.1355	2.17174	3	53.3931	7.4917	4	52.2342	5.16917	9	52.5886	5.04737	9
	14.3283	87.2993	66.4752	65.5731	65.3172	67.4025	64.8256	66.036	64.6573		94.2783	31.7056	31.8685	31.7138	32.4231	32.056	32.5321	32.6116		87.8494	58.3592	58.9954	57.6509	58.6904	59.6081	60.1244	58.9863		57.389					14.3283	89.809	2.24027	3	53.4823	7.53926	4	52.1816	5.16964	9	52.3819	5.06317	9
	14.3961	87.5528	66.1987	64.9001	65.9557	67.5194	65.2825	65.5264	64.8038		93.9658	31.5072	31.1872	31.9876	32.1829	31.5987	32.3195	32.5359		87.3309	58.3514	58.3783	58.5162	58.4176	59.7527	60.1487	58.9075		58.0585					14.3961	89.6165	2.17558	3	53.529	7.57877	4	52.1161	5.20766	9	52.3195	5.10856	9
	14.4643	88.2938	66.0072	64.9982	65.2493	66.9624	65.1549	65.317	64.2243		94.4122	31.3605	31.63	31.8993	32.2985	31.5072	32.2086	32.3279		87.0078	58.3049	57.5346	58.2409	58.4336	59.576	59.4699	58.8207		58.2455					14.4643	89.9046	2.28417	3	53.4795	7.59491	4	51.9163	5.1186	9	52.0674	5.08012	9
	14.5319	87.8973	65.4258	65.5731	64.7602	66.591	64.96	65.31	64.7972		94.3973	31.2484	30.9572	31.4399	32.0672	31.7633	32.264	32.3185		87.7668	58.5765	58.0189	58.469	58.6102	59.5198	59.0659	59.2858		57.6647					14.5319	90.0205	2.18875	3	53.2288	7.52873	4	51.8319	5.19654	9	52.1427	5.07534	9
	14.6	88.0793	65.4896	65.2086	64.8553	66.983	65.6185	65.5683	63.878		95.2158	31.1017	31.3149	31.4929	32.3163	31.4066	32.4859	32.621		87.4737	58.5377	59.1282	58.0206	57.7676	59.4154	59.6235	59.1282		57.6942					14.6	90.2563	2.48591	3	53.2058	7.57219	4	51.8986	5.16439	9	52.1939	5.07535	9
	14.6679	88.5473	66.3192	65.7273	64.9232	67.5744	64.4628	65.7079	65.2168		94.4494	31.5503	31.0594	31.5548	31.9071	31.4158	31.8573	32.1577		87.7968	57.7926	58.3861	58.3746	58.1046	59.3993	59.4942	59.002		56.9361					14.6679	90.2645	2.10364	3	53.1496	7.50479	4	51.9569	5.23996	9	52.0793	5.1383	9
	14.7357	87.8518	65.7803	65.7553	65.0183	66.818	64.5569	64.926	64.8971		94.0848	31.5762	31.3235	31.3781	31.6403	31.1322	32.3472	32.5265		87.4512	57.9789	58.5189	58.8703	59.0194	59.3431	58.9528	59.4041		57.3791					14.7357	89.7959	2.14756	3	53.1786	7.45069	4	52.038	5.25002	9	52.0095	5.06772	9
	14.8036	87.6958	65.4754	65.4399	65.7723	67.2925	64.6577	65.7428	64.1444		95.1935	31.0586	31.3831	31.2191	31.9605	31.306	32.1531	31.7322		87.1957	58.2117	58.4095	58.3038	58.5941	60.106	58.8074	57.9852		56.69					14.8036	90.0283	2.5866	3	52.8589	7.51532	4	52.0416	5.25323	9	51.8483	5.10603	9
	14.8715	87.8583	66.142	65.4819	64.9368	67.0724	65.2624	65.7219	64.6173		95.1637	31.0586	30.8465	31.2544	31.9961	31.4249	32.1161	32.4697		87.2858	57.8081	57.9955	58.3196	58.4818	59.833	59.3487	58.3084		56.8869					14.8714	90.1026	2.53593	3	52.9739	7.59583	4	51.8206	5.23332	9	52.1225	5.10791	9
	14.9393	84.9269	18.7903	17.6726	15.3036	18.2175	15.857	13.8718	15.0603		102.894	16.1246	15.568	15.3622	13.4585	13.4352	17.3153	16.7455		85.0316	20.638	23.1232	20.3918	19.732	20.734	22.0184	21.7247		31.6038					14.9393	90.9509	5.97177	3	21.7892	3.40016	4	17.6477	1.01908	9	17.418	1.10305	9
	15.0074	84.6734	17.7267	16.2215	14.5768	16.5463	14.5132	12.8456	14.2876		101.704	16.0901	15.2274	15.8657	14.1167	13.9199	17.4633	17.3033		85.0917	19.6911	21.303	19.1488	18.3277	19.3447	20.3701	20.0694		30.0286					15.0074	90.4896	5.60843	3	20.8841	3.13576	4	16.8149	0.781855	9	16.6797	0.957042	9
	15.0751	83.2044	16.6915	15.6747	13.6462	15.6042	14.7417	12.5384	13.7681		102.738	15.952	15.5084	15.742	14.1345	14.0388	18.2953	17.2182		84.5657	18.4803	20.2797	18.2991	17.9987	18.5497	19.1176	19.3047		28.3154					15.075	90.1694	6.29663	3	19.8598	2.86807	4	16.3208	0.709664	9	16.397	0.872979	9
	15.1429	82.8274	15.6279	15.3242	13.1028	14.827	13.9622	11.9799	13.6082		102.001	15.9089	15.3722	15.6537	14.1434	14.1211	18.5171	17.5208		85.4524	17.9215	19.5688	17.6776	17.0599	18.0278	18.1157	18.0514		27.0257					15.1429	90.0938	6.00189	3	19.121	2.68395	4	15.8588	0.652789	9	15.9894	0.841699	9
	15.2108	83.7634	14.6494	14.3568	12.247	14.0774	13.2836	11.4772	12.9954		100.015	16.0211	15.3466	15.6714	14.0366	14.0754	18.4432	18.0598		86.2188	16.9901	18.4126	17.001	16.5784	17.1043	17.3966	17.0188		25.7064					15.2108	89.999	5.05784	3	18.3417	2.50141	4	15.3031	0.619783	9	15.5394	0.858583	9
	15.2786	83.6659	13.841	13.803	11.7851	13.3003	12.175	11.1282	11.8031		101.012	16.3316	15.4573	15.8392	14.01	14.3497	18.9701	18.1449		85.0992	16.7339	17.7799	16.3244	15.9445	16.221	16.3785	16.3408		25.0468					15.2786	89.9257	5.55854	3	17.9883	2.43823	4	14.916	0.610797	9	15.0568	0.945948	9
	15.3465	82.9769	12.9689	12.8356	11.1941	12.6332	11.5702	10.3323	11.5966		100.618	16.2022	15.6702	15.6714	14.0278	14.4046	19.0164	18.2583		84.2801	15.9423	16.7174	15.404	15.2383	15.7151	15.7401	16.0019		24.5053					15.3465	89.2916	5.67551	3	17.4047	2.47789	4	14.3769	0.604282	9	14.7373	1.01158	9
	15.4144	83.5554	12.5363	12.1486	10.8477	12.2481	11.0932	9.9623	10.764		101.868	16.2712	15.6447	16.0247	14.0366	14.5144	19.3122	18.6271		85.5425	15.5387	16.3659	15.0028	14.9494	15.161	14.9725	15.2609		23.0285					15.4144	90.3218	5.80131	3	16.8437	2.21426	4	14.141	0.651549	9	14.4075	1.10244	9
	15.4822	82.9444	11.8131	11.6158	10.5964	11.4916	10.5288	9.59927	10.2178		101.533	16.8234	15.9343	16.1572	14.4636	14.743	19.4786	18.5893		84.4605	15.5309	15.9206	14.8061	14.5001	14.4624	14.819	14.9298		22.7528					15.4822	89.6459	5.95951	3	16.73	2.27113	4	13.9429	0.714239	9	14.152	1.17195	9
	15.5501	83.4124	11.4018	11.1392	10.216	10.9827	9.88376	9.25021	10.3111		102.024	16.8752	16.0365	16.2809	14.5793	15.0174	19.7559	19.1471		84.0848	14.8556	15.4207	14.1059	13.8983	14.35	14.2776	14.2992		21.975					15.5501	89.8403	6.09483	3	16.2769	2.21006	4	13.6288	0.7646	9	14.0325	1.25859	9
	15.6182	83.3669	10.9906	10.6835	9.96468	10.6526	9.81657	8.9919	9.71824		101.577	16.8752	15.9939	16.2986	14.7216	15.0357	20.2829	18.8918		83.7466	14.452	14.991	13.8541	13.5773	14.1813	13.9706	14.0233		21.3449					15.6182	89.5636	6.00788	3	15.9157	2.17554	4	13.4153	0.802534	9	13.8791	1.31917	9
RAW DATA
		Mn (uM)/Mg(mM)									Mn (uM)/Mg(mM)									Mn (uM)/Mg(mM)									Mn (uM)/Mg(mM)
		0/0	50/0	50/0.5	50/0.5	50/0.5	50/2	50/2	50/2		0/0	50/0	50/0.5	50/0.5	50/0.5	50/2	50/2	50/2		0/0	50/0	50/0.5	50/0.5	50/0.5	50/2	50/2	50/2		50/0
		16736	16431	16376	16472	17574	16928	16677	17635		15408	14878	15722	15381	15786	15159	15535	15242		17322	17479	16858	17112	17063	17188	17439	18022		12278
		16737	16290	16335	16378	17343	16596	16744	17673		15237	14945	15721	15453	15716	15265	15576	15474		17120	17313	16791	16923	17199	16957	17218	17921		12313
		16524	16346	16288	16278	17345	16590	16770	17419		15259	14977	15454	15368	15676	15054	15431	15046		16885	17131	16372	16711	16697	16786	17146	17913		12250
		16453	16289	16196	16282	17188	16607	16695	17292		15082	14784	15478	15224	15535	14986	15364	15328		16728	17103	16483	16512	16596	16667	17072	17790		12063
		16283	16240	16059	16217	17043	16440	16395	17263		15106	14761	15425	15165	15479	15096	15299	15287		16522	16736	16205	16272	16522	16489	16824	17784		12183
		16329	16141	16104	16107	17134	16399	16406	17225		15033	14776	15389	14975	15524	14956	15254	15087		16434	16672	16159	16270	16348	16389	16588	17563		12102
		16214	16196	15924	16037	17107	16328	16174	17270		15047	14697	15424	15136	15317	14963	15296	14965		16195	16623	16045	16136	16175	16363	16590	17474		12068
		15992	16080	15873	15948	16839	16416	16260	17154		14955	14684	15348	15053	15369	14892	15167	14753		16436	16478	15897	15957	16246	16276	16442	17196		11981
		16127	15841	15818	15834	16907	16213	16183	16977		14976	14501	15154	15015	15289	14794	15085	15019		16134	16365	15976	15926	16027	16185	16318	17061		11930
		16060	15732	15799	15669	16755	16083	16266	16964		14944	14476	15124	14972	15134	14791	15021	14956		15912	16138	15548	15821	15793	15823	16090	17063		11935
		15897	15698	15651	15657	16743	16033	15931	16994		14788	14381	14965	14688	15092	14787	15035	14749		15808	15984	15709	15687	15859	15876	16024	16806		11931
		15765	15641	15694	15636	16681	16177	15875	16682		14997	14448	14899	14728	15042	14591	14897	14514		15487	15942	15517	15640	15575	15702	15941	16600		11865
		15924	15588	15570	15597	16599	15835	15794	16251		14713	14204	15036	14728	14901	14541	15016	14776		15567	15870	15705	15332	15537	15524	15740	16842		11949
		15781	15456	15608	15595	16503	15882	15825	16489		14695	14339	14699	14655	14968	14554	14820	14348		15499	15633	15484	15436	15522	15468	15615	16552		11877
		15773	15515	15635	15409	16488	15730	15782	16337		14662	14331	14847	14380	14952	14352	14680	14306		15484	15801	15435	15282	15378	15409	15547	16288		11962
		15655	15362	15504	15414	16372	15829	15734	16426		14585	14262	14624	14489	14784	14387	14825	14535		15262	15645	15444	15282	15188	15268	15435	16080		11898
		15603	15560	15384	15378	16201	15647	15602	16372		14647	14114	14720	14522	14662	14332	14627	14216		15217	15610	15377	15258	15159	15283	15388	16020		11889
		15615	15420	15412	15442	16176	15735	15451	16117		14568	14220	14670	14313	14781	14420	14547	14420		15135	15552	15089	15200	15134	15238	15278	16234		11834
		15455	15149	15499	15462	16226	15661	15563	16216		14556	14160	14733	14291	14751	14328	14616	13926		15070	15582	15340	15134	15227	15247	15138	15821		11795
		15302	15229	15433	15365	16191	15350	15295	15953		14318	14063	14585	14098	14761	14397	14540	14559		15040	15455	15155	14959	14962	15114	15205	15818		11610
		15145	15044	15346	15351	15907	15383	15321	16059		14476	14089	14557	14264	14506	14163	14562	13992		15120	15205	15268	14903	14827	15206	14922	15629		11719
		15219	15292	15380	15262	16019	15447	15579	15916		14294	13985	14380	14168	14542	14025	14313	14213		15016	15160	15265	14874	14900	14933	15047	15374		11755
		15174	14993	15293	15242	15831	15453	15370	16020		14113	13934	14408	14102	14520	13925	14412	13806		14893	15200	15033	15013	14623	14792	14984	15588		11637
		15188	15104	15088	15247	15952	15290	15201	15791		14320	13957	14278	14223	14559	13925	14165	14189		14760	15141	15242	14749	14896	14976	15068	15380		11675
		15083	15145	15113	15364	15855	15307	15297	15801		14271	13845	14229	14188	14315	13972	14297	13800		14715	15007	14914	14772	14630	14967	14811	15342		11685
		15040	15032	15097	15144	15823	15202	15239	15872		14247	13751	14366	14005	14385	13839	14210	14295		14603	15117	14935	14711	14553	14919	14829	15232		11627
		15215	14942	15018	15218	15650	15302	15296	15771		14233	13821	14243	14164	14456	13852	14207	14013		14713	14969	14915	14632	14541	14560	14729	15088		11592
		14984	14835	15003	15109	15732	15183	15049	15763		14160	13790	14279	13946	14175	14128	14314	13582		14646	14854	14824	14562	14537	14618	14747	14971		11563
		14994	15001	14980	15184	15609	15198	15082	15496		14095	13888	14282	13836	14163	13699	14100	13925		14498	14828	14810	14493	14427	14533	14605	14987		11576
		14905	14882	15003	15172	15608	15044	15073	15700		14047	13851	14280	13877	14101	13738	13947	13835		14347	14843	14727	14583	14398	14564	14621	14986		11637
		14796	14897	14928	15225	15490	15191	15236	15303		13845	13842	14136	13818	14020	13718	13923	13945		14480	14799	14768	14303	14409	14331	14445	14852		11386
		14922	14865	14956	14994	15265	15042	15026	15546		13807	13730	14259	13855	14142	13760	13923	13538		14395	14736	14678	14422	14179	14429	14662	14780		11538
		14869	14703	15109	14869	15412	15023	15098	15398		14021	13777	13929	13772	14115	13563	14039	13753		14253	14580	14602	14423	14328	14426	14418	14554		11360
		14785	14846	14960	15065	15256	15033	15120	15503		13631	13840	13987	13731	13970	13485	13848	13789		14435	14811	14725	14406	14232	14275	14424	14563		11441
		14720	14688	14964	14988	15376	15209	14981	15166		13855	13812	14200	13693	14042	13612	13771	13366		14282	14763	14506	14353	14104	14430	14481	14844		11336
		14853	14644	14681	14962	15258	14860	15001	15364		13809	13574	14003	13707	14054	13463	13822	13277		14188	14652	14683	14365	14196	14197	14410	14571		11455
		14778	14687	14742	14871	15247	15042	14910	15264		13871	13723	13996	13662	13973	13416	13736	13255		14193	14771	14454	14259	14249	14172	14395	14387		11440
		14566	14747	14784	14961	15094	14980	14948	15200		13625	13743	13990	13638	13815	13419	13779	13656		14188	14672	14488	14230	14163	14148	14371	14419		11371
		14799	14619	14768	14979	15098	14936	15071	15105		13582	13720	13901	13583	14012	13484	13628	13383		14178	14533	14403	14160	14138	14115	14317	14620		11205
		14632	14565	14764	14914	15073	14849	14870	15052		13759	13692	14124	13779	13873	13570	13717	13296		14056	14838	14557	14172	14062	14016	14096	14425		11303
		14679	14523	14628	14716	14997	14664	14650	15246		13621	13639	14040	13781	13784	13356	13529	13174		14152	14529	14473	14081	13962	13974	14218	14373		11307
		14651	14534	14600	14843	15092	14732	14847	15179		13658	13702	13970	13502	14023	13291	13672	13502		14043	14588	14427	14086	14000	14080	14100	14451		11334
		14575	14667	14709	14630	14951	14798	14848	14995		13468	13737	13728	13422	13731	13341	13734	13586		14062	14529	14554	14075	13922	13967	14237	14334		11294
		14595	14558	14587	14815	15080	14759	14737	15095		13519	13597	13946	13627	13659	13183	13681	13132		13969	14437	14415	14103	13939	13889	14242	14141		11295
		14558	14577	14531	14708	15032	14782	14571	15098		13538	13549	13650	13547	13790	13368	13446	13413		13991	14468	14311	13976	13782	13842	14015	14310		11209
		14425	14577	14652	14665	15007	14689	14685	14913		13614	13480	13832	13511	13761	13358	13464	13093		13996	14353	14353	14098	13854	13864	13927	14415		11153
		14500	14540	14546	14814	15030	14555	14760	14966		13453	13469	13806	13529	13786	13224	13496	13078		13889	14277	14372	14142	13756	13980	13940	14373		11159
		14405	14465	14577	14804	15082	14608	14741	14829		13616	13478	13755	13532	13518	13179	13389	13406		13871	14384	14494	13992	13754	13880	14037	14262		11095
		14313	14349	14536	14658	15055	14577	14702	15033		13347	13436	13830	13522	13833	13112	13512	12999		13846	14295	14213	14001	13629	13911	14011	14196		11109
		14251	13829	14011	14485	14711	14402	14099	13640		13683	13884	13954	13985	13974	13591	13616	12977		13984	13741	13909	13921	13748	13405	13633	13761		11219
		14152	13933	14100	14541	14632	14441	14228	13650		13452	13753	14050	14257	14211	13655	13546	13294		13850	13804	13960	13712	13564	13357	13648	13855		11998
		14185	13639	13791	14325	14532	14385	14056	13996		13625	13890	14011	14094	13761	13679	13529	13288		13674	13812	13930	13933	13499	13235	13657	13865		12078
		14053	13760	13902	14377	14594	14087	14216	14327		13575	13970	13896	13728	14128	13562	13458	12832		13780	13791	14047	13690	13613	13154	13617	13725		11911
		14008	13768	13937	14166	14478	14192	14145	13777		13602	13707	13870	13962	14018	13564	13440	12855		13641	13717	13912	13666	13517	13263	13516	13752		11951
		13975	13770	13755	14344	14587	14227	14136	13987		13531	13944	13804	13873	14090	13396	13445	13241		13706	13625	14097	13483	13586	13186	13527	13726		11924
		13892	13723	13891	14237	14494	14115	14068	14006		13590	13879	13813	14064	13961	13538	13486	13343		13835	13776	13775	13764	13549	13490	13538	13584		11707
		13968	13654	13939	14199	14395	14080	13987	14228		13318	13743	13858	13838	14025	13520	13536	13365		13706	13592	13918	13795	13476	13413	13619	13820		11648
		13914	13646	13652	14092	14242	14137	14036	13615		13507	13619	13893	13969	13921	13628	13513	13163		13525	13745	13885	13633	13413	13368	13542	13672		11733
		13873	13764	13796	14182	14422	14131	13962	13896		13420	13696	13779	13687	13948	13440	13447	12772		13683	13663	13716	13578	13485	13136	13379	13541		11659
		13987	13815	13815	14146	14312	14202	13982	13962		13495	13660	13905	13669	13833	13368	13500	13294		13501	13654	13844	13700	13350	13052	13587	13487		11688
		14043	13658	13721	14062	14452	14148	14073	13741		13551	13600	13680	13657	13845	13364	13399	12745		13587	13617	13821	13554	13320	13039	13384	13636		11616
		14019	13728	13939	14171	14411	14122	13976	13716		13420	13597	13850	13845	14012	13304	13343	12815		13455	13543	13640	13447	13245	13231	13450	13698		11794
		13875	13726	13782	13972	14324	13950	14079	13975		13428	13887	13825	13806	13861	13424	13440	12620		13410	13538	13773	13602	13148	13226	13445	13603		11671
		13992	13748	13832	14106	14283	14092	13963	14349		13334	13585	13907	13625	13859	13343	13369	12677		13554	13677	13698	13496	13191	13148	13276	13770		11497
		13953	13709	13891	14084	14334	14167	13971	13965		13465	13588	13965	13623	13967	13328	13431	13026		13285	13444	13490	13376	13155	13058	13316	13564		11567
		14042	13731	13730	14001	14284	14161	13932	13527		13307	13740	13783	13707	13866	13372	13573	13104		13365	13458	13552	13456	13245	12975	13337	13586		11627
		13858	13584	13813	14204	14322	14120	14141	13954		13520	13672	13970	13726	13730	13285	13462	12984		13387	13527	13701	13472	13205	12968	13230	13526		11639
		13752	13712	13829	13975	14081	14066	13992	14349		13270	13693	13918	13934	13923	13263	13501	13040		13368	13289	13610	13347	13182	13071	13141	13528		11451
		13837	13599	13799	13993	14100	14132	13865	13695		13394	13721	13880	13655	13778	13444	13341	12788		13330	13411	13616	13444	13247	12913	13381	13558		11511
		15385	14103	14265	14722	14541	14883	14324	15013		13440	11591	11742	11320	11242	10934	10817	10576		13290	13512	13464	13318	12934	13023	13133	13519		11404
		15227	13881	14131	14842	14231	14864	14162	14981		13591	11574	11652	11248	11113	10649	10779	10834		13297	12691	12672	12567	12319	12360	12365	12372		10157
		15074	13858	14070	14713	14284	14613	14153	14957		13418	11152	11318	10995	10932	10496	10487	10308		13282	12435	12560	12444	12172	12284	12144	12212		10123
		15062	13569	13882	14575	14432	14546	14137	14362		13564	11030	11179	10752	10792	10495	10468	10292		13111	12483	12452	12316	12100	12176	12275	12120		10073
		15143	13762	13867	14311	14180	14395	13988	14180		13480	10913	10978	10700	10590	10308	10388	10560		13194	12420	12428	12188	11874	11955	12038	12054		9995
		15125	13601	13784	14506	14162	14301	14009	14247		13484	10788	10993	10549	10499	10176	10045	10378		13288	12205	12348	12111	11855	11862	11906	11989		9726
		15056	13543	13717	14425	13976	14249	13965	14507		13522	10652	10701	10578	10437	10133	9973	10164		13207	12280	12266	12158	11825	11783	11759	11784		9625
		14996	13544	13628	14288	14138	14166	13777	14063		13476	10396	10698	10299	10362	9887	10027	9949		13054	12204	12291	11904	11794	11709	11613	11700		9571
		14841	13418	13440	14096	13887	13949	13872	14032		13437	10332	10589	10166	10157	9941	9891	9783		13069	12027	12222	11894	11806	11702	11658	11736		9486
		15004	13343	13604	14159	13756	14032	13806	14212		13558	10186	10354	10155	10100	9704	9751	9691		13252	12166	12097	11946	11604	11717	11453	11693		9425
		15061	13327	13466	14096	13943	13814	13666	13857		13469	10144	10268	9936	9912	9641	9654	9369		13109	11860	12028	11877	11561	11553	11441	11751		9362
		15001	13335	13448	13946	13802	13885	13625	13841		13399	9906	10150	9862	9785	9523	9465	9627		13033	11799	11893	11713	11559	11499	11350	11540		9266
		14972	13260	13342	13918	13709	13864	13717	13601		13496	10011	10031	9691	9667	9344	9490	9364		13016	11706	11816	11533	11444	11377	11265	11467		9145
		14971	13133	13363	13884	13836	13688	13559	13760		13370	9864	10081	9628	9687	9277	9209	9335		12941	11806	11684	11477	11350	11345	11217	11377		9039
		14960	13058	13358	13840	13655	13684	13436	13628		13478	9722	9795	9551	9486	9163	9138	8989		13033	11648	11671	11537	11138	11196	11069	11297		8980
		14875	13206	13378	13777	13711	13679	13363	13263		13492	9674	9757	9486	9394	9049	9126	8851		12791	11501	11449	11373	11064	11178	10891	11357		9013
		14901	13014	13174	13792	13602	13568	13467	13508		13498	9546	9627	9354	9363	9023	9133	8758		12850	11491	11520	11315	11036	11024	10800	11200		9103
		14842	13142	13251	13581	13406	13412	13446	13405		13411	9379	9546	9291	9439	8861	9020	9014		12760	11360	11505	11257	11001	10920	10824	10968		8933
		14795	13118	13158	13554	13449	13460	13331	13152		13426	9284	9422	9153	9234	8899	8884	8796		12756	11254	11354	11122	10916	10882	10645	10941		8955
		14956	13002	12983	13551	13477	13451	13250	13088		13365	9233	9262	9134	9046	8806	8814	8862		12800	11181	11408	11111	10793	10794	10625	11058		8843
		14831	12967	13066	13438	13341	13232	13189	13339		13394	9089	9314	9057	8957	8610	8711	8711		12794	11174	11222	10931	10749	10679	10667	10924		8924
		14777	12920	13038	13417	13358	13297	13128	12930		13297	9021	9123	8990	8914	8632	8707	8606		12781	11017	11200	10805	10709	10626	10578	10713		8768
		14775	12829	12974	13399	13282	13270	13166	12895		13295	9005	9041	8935	8912	8457	8651	8560		12788	11136	11107	10738	10642	10563	10380	10694		8686
		14780	12766	12882	13205	13159	13290	12999	13160		13319	8851	8991	8794	8818	8569	8434	8583		12721	10951	11119	10760	10506	10507	10392	10624		8622
		14707	12680	12945	13377	13104	13110	13040	12854		13207	8833	8906	8648	8703	8304	8452	8447		12696	11117	11126	10766	10457	10529	10271	10453		8615
		14656	12564	12834	13181	13055	13120	12951	12686		13498	8678	8837	8481	8537	8329	8353	8092		12692	10779	10894	10789	10349	10415	10368	10579		8586
		14710	12608	12863	13047	13112	13003	12965	12775		13437	8591	8807	8550	8488	8137	8314	8074		12681	10934	10796	10676	10386	10455	10222	10338		8422
		14712	12659	12676	13068	13048	12999	13119	12707		13288	8555	8700	8368	8391	8187	8226	8181		12525	10799	10825	10480	10245	10450	10222	10439		8515
		14650	12448	12641	13164	12836	12964	12798	12593		13202	8476	8679	8269	8360	8058	8152	8031		12700	10672	10802	10485	10167	10248	10169	10370		8458
		14653	12488	12693	13036	12933	12907	13036	12571		13266	8343	8466	8219	8283	8016	8134	7738		12644	10709	10688	10328	10253	10311	10025	10269		8280
		14643	12280	12615	12918	12788	12796	12807	12733		13393	8257	8477	8135	8262	7935	7981	7923		12676	10599	10748	10353	10114	10116	10020	10250		8333
		14638	12550	12596	12989	12820	12771	12657	12605		13311	8295	8369	8093	8125	7759	7847	7927		12602	10585	10662	10256	9952	10162	9988	10305		8339
		14596	12497	12616	12812	12782	12838	12650	12389		13146	8176	8255	8168	8175	7763	7781	7646		12553	10391	10549	10350	9956	10019	9987	10148		8145
		14427	12305	12419	12835	12854	12866	12722	12412		13244	8115	8231	7921	8078	7799	7786	7750		12634	10465	10596	10239	9931	10016	9787	10175		8252
		14568	12132	12511	12871	12736	12616	12555	12367		13276	7996	8189	7917	7830	7783	7661	7675		12470	10378	10590	10134	9993	10159	9765	10143		8122
		14452	12217	12395	12790	12789	12673	12477	12195		13367	7979	8130	7893	7813	7654	7693	7264		12706	10268	10511	10148	9910	9928	9833	10117		8105
		14505	12159	12455	12757	12694	12617	12424	12217		13185	7945	8044	7788	7727	7561	7672	7528		12567	10394	10468	10200	9995	9945	9731	10128		7980
		14435	12134	12294	12748	12669	12598	12393	12476		13207	7888	7966	7707	7685	7477	7505	7277		12618	10312	10377	10058	9821	9843	9807	10078		8051
		14395	12156	12327	12638	12643	12678	12397	12216		13243	7854	7808	7645	7706	7390	7416	7461		12569	10362	10409	9923	9815	9900	9680	9928		7945
		14370	12193	12249	12550	12606	12378	12400	12117		13281	7734	7791	7624	7611	7289	7444	7120		12526	10212	10311	10061	9794	9861	9664	10018		8010
		14526	12157	12199	12610	12478	12444	12254	12178		13371	7725	7777	7565	7642	7281	7438	7132		12540	10153	10266	9910	9756	9905	9547	9908		7980
		14487	12121	12203	12504	12562	12313	12304	11990		13197	7621	7549	7414	7448	7233	7251	7318		12427	10126	10232	9824	9687	9775	9518	9935		7863
		14391	11909	12093	12371	12444	12326	12221	12015		13185	7503	7588	7424	7479	7190	7246	6958		12388	10110	10376	9917	9643	9661	9719	9999		7814
		14417	11999	12150	12402	12527	12335	12254	12011		13095	7469	7608	7348	7419	7057	7128	7231		12567	10109	10266	9836	9637	9737	9568	9813		7805
		14346	11978	12175	12407	12273	12247	12115	11913		13320	7438	7476	7392	7402	7027	7160	7114		12516	10056	10193	9790	9554	9717	9414	9910		7754
		14200	11857	12021	12250	12336	12192	12031	11945		13220	7331	7502	7220	7337	6999	7098	6876		12595	9994	10075	9801	9534	9573	9468	9873		7813
		14340	11836	12018	12362	12349	12269	12092	11884		13115	7337	7361	7194	7262	6991	6981	6827		12544	9960	10095	9816	9490	9552	9449	9729		7671
		14373	11850	12009	12360	12416	12250	11861	12048		13208	7207	7345	7142	7158	6870	6970	6809		12415	9941	10072	9794	9464	9614	9345	9866		7681
		14323	11731	11899	12212	12232	12256	11923	11885		13178	7114	7299	7160	7133	6817	7004	6698		12546	9801	9986	9668	9398	9619	9384	9828		7722
		14469	11849	12069	12200	12234	12185	11889	11693		13077	7105	7241	7027	7054	6825	6873	6742		12576	9875	9964	9707	9450	9564	9347	9750		7675
		14273	11703	11913	12217	12265	12197	11841	11994		13164	7082	7167	6991	6909	6683	6854	6619		12333	9858	9868	9517	9311	9462	9326	9638		7695
		14322	11707	11879	12267	12225	12126	11870	11722		13198	7055	7084	6956	6931	6625	6832	6758		12468	9789	9986	9563	9270	9551	9303	9643		7661
		14412	11712	11927	12147	12170	11992	11857	11641		13098	7041	7071	6837	6934	6622	6696	6755		12463	9851	9892	9600	9350	9417	9243	9407		7602
		14202	11683	11809	12165	12133	11924	11802	11568		13026	6874	7021	6810	6930	6528	6670	6670		12376	9666	9870	9481	9269	9486	9321	9570		7571
		14159	11550	11799	12188	12092	11972	11732	11666		13064	6863	7026	6758	6837	6559	6662	6465		12302	9729	9831	9418	9183	9391	9362	9613		7576
		14399	11530	11696	12028	12238	11935	11710	11598		13122	6804	6914	6724	6780	6413	6629	6626		12309	9692	9758	9505	9320	9331	9267	9656		7463
		14237	11529	11737	12033	12116	11873	11767	11602		13095	6729	6839	6684	6725	6486	6552	6526		12306	9686	9638	9518	9178	9296	9298	9656		7477
		14239	11501	11694	11974	12104	11883	11488	11601		13153	6701	6866	6667	6747	6389	6541	6345		12357	9634	9671	9328	9143	9264	9179	9580		7542
		14169	11412	11730	11905	12113	11865	11582	11588		13116	6695	6842	6591	6697	6414	6403	6450		12359	9561	9634	9307	9194	9227	9121	9553		7397
		14262	11476	11739	11971	11972	11913	11656	11505		13187	6599	6741	6523	6603	6312	6389	6436		12319	9663	9710	9227	9109	9289	9094	9406		7464
		14279	11349	11658	11851	11973	11796	11595	11507		13213	6677	6679	6503	6497	6300	6359	6354		12189	9468	9628	9327	9185	9202	9182	9484		7373
		14266	11402	11620	11912	12002	11828	11424	11502		13183	6561	6677	6438	6536	6257	6276	6315		12293	9450	9508	9302	9076	9252	9002	9317		7411
		14262	11333	11610	11790	11974	11761	11414	11520		13044	6525	6570	6361	6462	6197	6262	6271		12194	9481	9493	9316	9015	9236	9063	9469		7296
		14373	11315	11661	11744	11951	11748	11409	11545		13125	6445	6523	6362	6425	6195	6202	6094		12245	9549	9489	9297	9014	9063	9174	9284		7443
		14299	11163	11719	11758	11817	11630	11421	11436		13096	6427	6536	6294	6366	6079	6192	5946		12287	9572	9419	9220	9024	9151	8997	9354		7306
		14298	11310	11359	11809	11822	11627	11333	11349		13102	6463	6444	6286	6348	6109	6144	5949		12437	9463	9417	9195	8966	9192	8900	9284		7296
		14320	11270	11431	11720	11813	11657	11335	11408		13152	6327	6372	6306	6376	6058	6043	5924		12297	9346	9443	9192	8928	8992	9060	9277		7268
		14300	11196	11412	11702	11757	11672	11309	11167		13010	6371	6393	6238	6305	6017	6017	6135		12355	9247	9443	9103	8825	8962	8961	9274		7261
		14327	11150	11444	11614	11707	11562	11377	11327		13109	6266	6306	6231	6245	6042	6060	6117		12312	9259	9353	9067	8895	9120	8902	9216		7221
		14147	11116	11284	11658	11652	11577	11354	11252		13018	6248	6417	6095	6225	5976	6042	5957		12214	9300	9275	9148	8880	9076	8857	9152		7218
		14146	11063	11287	11562	11671	11634	11283	11291		13182	6154	6240	6069	6143	5909	5988	5825		12231	9308	9232	9068	8916	8995	8886	9134		7147
		14188	11046	11323	11588	11701	11460	11226	11226		13131	6124	6265	6057	6163	5878	5937	5766		12097	9258	9366	9103	8889	9051	8719	9229		7218
		14207	11083	11202	11489	11705	11578	11209	11156		13146	6116	6151	6060	6060	5828	5870	5843		12030	9168	9288	9014	8866	8959	8835	9140		7186
		14107	11045	11219	11540	11655	11412	11127	11324		13147	6102	6168	5994	6059	5818	5844	5958		12124	9115	9253	9021	8852	8934	8800	9097		7090
		14282	11072	11260	11515	11499	11376	11249	11083		13007	6044	6084	5995	6087	5794	5817	5667		12216	9114	9068	8993	8834	8900	8849	9019		7124
		14163	11026	11214	11405	11559	11437	11194	11154		13000	6080	6097	5935	5971	5676	5838	5837		12103	9144	9259	8930	8807	8892	8730	9118		7080
		14247	10958	11095	11312	11493	11391	11122	11187		12982	6019	6002	5904	5971	5653	5720	5786		12219	9133	9241	8930	8814	8953	8715	9109		7080
		14150	10966	11053	11515	11422	11358	11095	11048		13070	5955	6041	5911	5945	5647	5712	5596		12104	9049	9053	9045	8740	8880	8785	9082		7095
		14108	10780	11117	11381	11479	11296	11099	10971		12920	5897	5978	5844	5926	5642	5686	5705		12178	9135	9116	8888	8627	8871	8729	8983		7090
		14215	10977	11135	11337	11419	11343	10989	11158		13182	5896	5974	5853	5849	5599	5688	5574		12145	9067	9096	8846	8563	8856	8709	9077		7068
		14254	10833	11041	11305	11472	11240	11003	11048		13012	5845	5905	5779	5771	5608	5680	5646		11985	9060	9040	8886	8629	8832	8715	8962		7076
		14230	10884	11122	11088	11484	11245	11054	11088		12972	5807	5989	5755	5782	5532	5581	5654		12188	8926	9005	8880	8677	8780	8681	9016		6945
		14049	10810	10966	11163	11289	11200	11062	11189		13136	5812	5910	5661	5762	5577	5576	5589		12126	8969	9007	8944	8632	8677	8676	8967		6929
		14102	10945	11053	11128	11324	11189	10999	11066		12885	5748	5783	5607	5678	5456	5495	5530		12170	8959	9021	8810	8584	8725	8650	8978		6955
		14001	10793	10960	10996	11285	11161	11006	11034		13047	5678	5751	5613	5680	5496	5510	5616		12067	8939	8986	8754	8607	8635	8561	8796		7010
		14056	10747	11107	11029	11365	11202	10923	10945		12927	5688	5816	5796	5702	5446	5541	5384		12031	8880	8928	8879	8500	8650	8585	8812		6829
		14066	10672	10849	11015	11184	11077	10874	10958		13021	5650	5705	5541	5616	5403	5465	5501		12023	8920	8880	8742	8572	8665	8497	8802		6894
		14000	10815	10958	11073	11216	11064	10898	10940		12974	5604	5722	5563	5584	5310	5405	5457		11962	8955	8996	8830	8492	8692	8531	8862		6893
		14268	10685	10831	11015	11343	11078	10922	11011		12881	5665	5713	5515	5597	5333	5440	5362		12030	8860	8899	8725	8486	8545	8557	8761		6871
		14054	10623	10901	10941	11058	11072	10770	10785		13069	5634	5614	5461	5603	5338	5332	5404		11983	8802	8886	8838	8501	8752	8529	8748		6868
		14203	10555	10881	10924	11120	10975	10797	10825		13018	5558	5578	5455	5576	5249	5367	5352		12041	8790	8782	8712	8546	8730	8577	8756		6826
		14131	10588	10874	11016	11037	10977	10898	10787		13100	5534	5623	5478	5552	5279	5371	5212		12107	8904	8904	8665	8560	8565	8529	8779		6859
		13982	10693	10796	10926	11114	11055	10855	10874		12928	5526	5585	5438	5477	5144	5356	5075		12009	8704	8816	8593	8574	8590	8460	8709		6763
		13968	10620	10790	10885	11084	10968	10768	10917		13006	5444	5575	5420	5395	5191	5333	5107		12064	8824	8847	8653	8428	8666	8420	8711		6745
		14072	10604	10954	10964	11151	11028	10728	11055		13005	5438	5456	5393	5385	5140	5232	5217		12050	8649	8811	8699	8499	8499	8476	8679		6837
		14070	10610	10666	10893	11016	11056	10753	10862		12967	5422	5454	5365	5426	5103	5253	5050		11984	8750	8689	8621	8492	8555	8455	8714		6799
		14014	10543	10701	10808	10996	10981	10678	10743		13017	5408	5525	5358	5354	5100	5228	5217		11990	8842	8784	8660	8379	8604	8467	8665		6686
		14030	10460	10692	10874	11163	10888	10818	10802		13046	5377	5446	5273	5370	5116	5131	5174		12151	8683	8743	8507	8359	8386	8564	8437		6836
		14065	10511	10596	10846	11042	10883	10749	10757		12980	5336	5406	5223	5288	5111	5138	4964		12030	8627	8627	8506	8390	8525	8396	8550		6698
		14036	10487	10692	10879	10928	10815	10857	10769		12971	5313	5355	5236	5284	5056	5129	5081		11972	8745	8724	8548	8333	8471	8535	8576		6697
		13994	10495	10647	10778	10937	10882	10666	10834		12988	5267	5383	5194	5319	5022	5078	5091		12034	8710	8640	8488	8254	8587	8446	8627		6776
		13999	10473	10658	10818	10913	10744	10710	10788		12987	5212	5390	5130	5240	5040	5090	5085		12034	8556	8694	8516	8363	8484	8434	8558		6716
		14103	10464	10671	10838	10920	10836	10677	10811		12821	5247	5324	5126	5177	4971	5057	5066		11894	8655	8701	8562	8360	8437	8364	8471		6672
		13963	10382	10555	10755	10984	10782	10565	10692		12949	5192	5328	5147	5167	5001	5058	5014		11952	8658	8656	8393	8309	8450	8397	8492		6688
		14068	10385	10606	10815	10822	10731	10529	10781		12978	5149	5215	5130	5212	4923	5079	4822		12012	8660	8616	8431	8325	8472	8359	8550		6681
		14053	10389	10571	10800	10846	10777	10603	10755		13049	5179	5302	5115	5153	4895	5021	4987		11979	8555	8519	8430	8238	8432	8382	8508		6640
		13898	10431	10519	10678	10734	10802	10532	10679		12737	5132	5223	5087	5124	4851	4975	4928		12000	8511	8552	8481	8183	8398	8366	8472		6676
		13922	10457	10420	10654	10863	10637	10468	10591		12940	5128	5206	5057	5104	4818	4967	4715		11979	8482	8523	8460	8278	8478	8260	8536		6690
		14103	10384	10512	10730	10819	10669	10456	10781		12938	5154	5173	5014	5029	4849	4948	5012		11849	8542	8545	8317	8286	8412	8315	8546		6614
		13843	10241	10472	10708	10749	10706	10506	10568		13014	5127	5084	5042	5049	4846	4930	4907		12020	8446	8480	8443	8237	8425	8267	8296		6569
		13969	10296	10542	10736	10668	10688	10596	10598		13035	5011	5145	4989	5015	4832	4910	4792		11946	8508	8552	8329	8152	8285	8324	8359		6591
		13997	10399	10434	10696	10704	10661	10510	10706		12958	5045	5123	4916	5003	4866	4854	4709		11963	8471	8535	8404	8101	8301	8205	8545		6563
		13908	10220	10429	10622	10740	10654	10467	10696		13053	5024	5105	4939	5033	4823	4868	4709		11977	8450	8446	8331	8117	8324	8264	8361		6609
		13863	10285	10480	10634	10650	10635	10466	10603		12887	4992	5064	4918	5007	4688	4881	4777		11948	8394	8519	8407	8152	8288	8222	8464		6536
		13896	10261	10421	10617	10723	10677	10438	10620		13072	5019	5089	4894	4935	4730	4824	4567		11929	8491	8523	8271	8174	8386	8155	8367		6616
		13846	10241	10432	10604	10736	10623	10386	10570		12989	4996	5034	4900	4938	4682	4737	4783		12068	8412	8453	8348	8158	8274	8245	8309		6672
		14063	10243	10310	10580	10781	10610	10409	10643		13054	4942	4962	4906	4910	4733	4800	4763		11923	8409	8343	8391	8196	8261	8170	8263		6512
		13826	10197	10307	10659	10609	10534	10319	10556		12929	4903	4946	4833	4828	4681	4810	4743		11886	8380	8482	8335	8090	8282	8291	8279		6552
		13768	10138	10375	10534	10699	10613	10323	10587		12934	4953	4954	4835	4846	4657	4766	4704		11881	8439	8274	8283	8156	8355	8205	8310		6466
		13954	10223	10276	10467	10604	10495	10285	10462		12896	4921	4942	4782	4817	4631	4740	4588		11959	8328	8359	8341	8017	8340	8131	8297		6605
		13832	10189	10226	10501	10626	10554	10409	10477		12948	4877	4966	4816	4821	4594	4644	4541		11828	8329	8316	8338	8108	8278	8165	8424		6475
		13824	10133	10257	10494	10621	10521	10294	10503		12911	4832	4888	4745	4834	4658	4680	4468		11887	8335	8286	8270	8095	8220	8069	8212		6488
		13916	10092	10266	10591	10583	10519	10281	10373		12872	4844	4875	4702	4857	4561	4633	4520		11888	8330	8272	8301	8043	8186	8086	8230		6531
		13896	10073	10259	10513	10629	10392	10411	10380		12920	4827	4910	4733	4793	4553	4678	4619		11913	8265	8323	8227	8081	8190	8122	8250		6470
		13966	10182	10301	10553	10680	10487	10290	10516		12919	4812	4891	4718	4791	4618	4631	4520		12080	8379	8248	8217	8043	8198	8016	8197		6458
		13751	10100	10299	10488	10623	10431	10308	10440		12843	4754	4833	4715	4691	4530	4625	4481		11867	8286	8356	8198	8045	8148	8093	8178		6526
		13812	10144	10144	10477	10474	10410	10215	10511		12883	4727	4785	4645	4757	4516	4556	4453		11944	8277	8411	8192	7993	8191	8073	8268		6453
		13845	10131	10222	10449	10507	10478	10234	10420		12973	4755	4809	4637	4674	4473	4558	4570		11773	8215	8324	8181	7960	8110	8041	8252		6424
		13892	10024	10113	10536	10633	10343	10243	10385		12909	4698	4814	4620	4650	4477	4546	4495		11942	8275	8284	8104	7930	8060	8103	8167		6403
		13876	10025	10161	10424	10532	10389	10230	10366		12946	4745	4768	4603	4671	4460	4536	4427		11915	8289	8275	8155	7942	8137	8047	8204		6449
		13868	10055	10107	10531	10455	10379	10185	10508		13013	4676	4722	4635	4650	4471	4562	4421		11861	8312	8187	8137	7981	8098	8024	8123		6524
		13946	9963	10185	10479	10505	10378	10185	10367		12958	4744	4785	4599	4643	4382	4494	4452		11922	8261	8241	8123	7972	8063	8041	8192		6474
		13907	10106	10261	10368	10471	10280	10202	10387		12845	4637	4711	4557	4647	4416	4464	4339		11802	8181	8273	8076	7949	8088	8012	8127		6411
		13842	9963	10172	10372	10491	10474	10152	10353		12886	4644	4684	4561	4658	4344	4452	4447		11779	8170	8205	8137	7993	8079	7928	8126		6458
		13892	10112	10107	10500	10491	10385	10181	10350		12980	4597	4719	4533	4581	4359	4477	4407		11816	8221	8143	8138	7921	8104	8007	8044		6364
		13794	9955	10060	10389	10539	10372	10096	10496		12990	4618	4615	4546	4556	4352	4447	4401		11767	8182	8110	8085	7949	8111	7905	8116		6307
		14036	10045	10117	10385	10373	10364	10093	10212		12844	4618	4624	4524	4509	4372	4367	4407		11873	8158	8177	8114	7872	8062	7987	8035		6363
		13789	9900	10028	10338	10487	10395	10029	10356		12819	4567	4589	4473	4538	4314	4388	4240		11852	8115	8276	8041	7797	8101	8013	8166		6349
		13651	10038	9987	10360	10412	10319	10045	10407		12840	4553	4578	4512	4438	4302	4322	4369		11832	8112	8191	8108	7797	8112	7935	8035		6302
		13803	10104	10104	10277	10489	10391	10149	10267		12829	4517	4568	4430	4508	4307	4354	4357		11716	8148	8140	8083	7896	8012	7985	8030		6302
		13909	9858	10039	10364	10404	10184	10072	10174		12992	4526	4554	4405	4513	4252	4355	4220		11806	8114	8117	8055	7871	8063	7915	8021		6354
		13982	9849	10093	10382	10363	10208	10033	10404		12921	4579	4522	4424	4489	4223	4391	4156		11954	8119	8164	8017	7825	8040	7991	7988		6294
		13816	9955	10140	10197	10371	10299	10093	10359		13113	4462	4522	4413	4461	4243	4238	4314		11765	8109	8193	7967	7781	8060	7916	8098		6293
		13768	9771	10160	10146	10245	10120	10047	10347		12868	4485	4523	4381	4490	4265	4261	4278		11869	8027	8059	7990	7847	8054	7832	8045		6211
		13807	9919	9995	10301	10340	10252	10028	10310		12858	4452	4494	4371	4436	4191	4277	4253		11892	8025	8040	8015	7856	8067	7895	8003		6303
		13652	9842	9965	10244	10309	10249	10014	10257		12977	4401	4485	4343	4379	4219	4282	4155		11877	8142	8044	7994	7811	7993	7954	7950		6280
		13829	10007	9930	10174	10419	10183	10000	10225		12742	4396	4441	4368	4351	4176	4288	4119		11685	7964	8095	8035	7751	8023	7868	7959		6306
		13799	9898	10022	10265	10238	10267	9979	10266		12912	4423	4448	4334	4407	4162	4226	4130		11887	7935	7990	7933	7885	7878	7897	7998		6279
		13609	9948	9845	10127	10300	10198	9841	10276		12834	4383	4469	4336	4321	4152	4211	4257		11713	7998	8108	8056	7755	7952	7883	7930		6291
		13732	9797	9925	10123	10285	10209	10043	10212		12917	4333	4431	4281	4320	4119	4207	4122		11815	7943	8068	7999	7754	7931	7967	7981		6247
		13731	9855	9973	10158	10283	10194	9947	10295		12931	4419	4360	4268	4304	4164	4264	4083		11810	8011	7982	7892	7744	8041	7999	7886		6304
		13700	9833	10008	10137	10379	10205	9974	10169		12841	4331	4385	4270	4329	4070	4134	3988		11917	7927	8076	7984	7745	7891	7822	8096		6191
		13810	9827	9928	10150	10374	10252	10008	10301		12801	4333	4340	4223	4285	4081	4151	4195		11740	8008	7993	7896	7705	7856	7874	7797		6246
		13597	9809	9890	10197	10332	10162	9942	10270		12906	4313	4395	4268	4295	4056	4120	4158		11938	8005	8023	7957	7739	7913	7792	7859		6245
		13722	9829	9754	10125	10272	10137	9910	10159		12975	4337	4328	4256	4297	4100	4128	4069		11825	8090	7996	8015	7682	7906	7889	7956		6228
		13688	9803	9866	10107	10277	10081	9843	10159		12831	4264	4328	4222	4287	4089	4141	4044		11733	7936	7946	7898	7710	7957	7818	7896		6230
		13710	9803	9823	10046	10218	10205	9845	10249		12767	4298	4291	4165	4201	4063	4105	4096		11725	7982	8062	7888	7677	7892	7711	7887		6333
		13730	9757	9867	10101	10225	10112	9887	10182		12942	4253	4322	4209	4270	4087	4155	3981		11751	7995	7952	7884	7669	7904	7808	7929		6221
		13673	9883	9849	10124	10250	10147	9928	10043		12859	4219	4257	4138	4268	4070	4097	4089		11672	7915	8028	7771	7629	7863	7782	7849		6141
		13664	9772	9906	10102	10161	10135	9819	10109		12955	4259	4292	4177	4208	4022	4109	4085		11794	7998	7969	7858	7677	7875	7724	7856		6187
		13633	9804	9731	10025	10202	10022	9884	10150		12885	4258	4268	4152	4218	4031	4086	4069		11653	7979	7987	7925	7572	7871	7698	7778		6194
		13533	9795	9752	10173	10151	10123	9868	10152		12840	4207	4228	4137	4207	4000	4083	4121		11756	7817	7963	7831	7634	7873	7769	7880		6251
		13606	9663	9829	10092	10180	10120	9905	10028		12983	4207	4233	4148	4165	3957	4090	3904		11873	7870	7924	7852	7600	7749	7756	7905		6149
		13531	9682	9827	10064	10234	9993	9798	10179		12852	4197	4201	4091	4138	3958	4063	4040		11645	7841	7873	7797	7605	7884	7740	7808		6147
		13644	9753	9727	10029	10185	10205	9802	10106		12815	4186	4245	4140	4169	3947	3978	4004		11821	7905	7916	7726	7651	7764	7695	7746		6138
		13744	9733	9803	10061	10058	10108	9726	10113		12886	4137	4159	4091	4139	3947	4006	3863		11742	7847	7940	7763	7569	7787	7813	7919		6095
		13570	9688	9810	10050	10113	9994	9895	10079		12927	4150	4236	4101	4118	3930	4005	3856		11597	7858	7903	7774	7534	7821	7767	7800		6179
		13696	9718	9728	10121	10037	10054	9754	10101		12875	4096	4170	4047	4108	3912	4021	3909		11711	7820	7905	7803	7638	7886	7709	7815		6100
		13549	9676	9689	9983	10067	10096	9825	10033		12763	4081	4176	4058	4129	3892	3974	3828		11784	7873	7832	7775	7540	7796	7758	7800		6102
		13551	9772	9700	10009	10167	9966	9738	10071		12888	4121	4156	4055	4091	3959	3923	3913		11629	7767	7790	7706	7585	7811	7620	7725		6061
		13628	9589	9712	9965	10089	9960	9813	10103		12635	4082	4071	3996	4066	3877	3974	3862		11616	7848	7743	7789	7569	7822	7786	7786		6073
		13583	9701	9681	10036	10149	10039	9733	9965		12814	4082	4147	4011	4096	3926	3970	3826		11528	7852	7892	7668	7578	7764	7643	7715		6106
		13623	9575	9811	10015	10107	9970	9818	10021		12837	4102	4083	3950	4047	3868	3916	3923		11663	7856	7747	7781	7528	7693	7659	7976		6013
		13603	9678	9736	9895	10005	10015	9694	9962		12779	4075	4077	4005	4059	3827	3895	3902		11755	7744	7797	7715	7516	7712	7671	7812		6065
		13696	9622	9745	9881	10089	10063	9653	10015		12760	4003	4119	3940	4047	3805	3926	3886		11663	7831	7796	7676	7602	7759	7667	7735		6128
		13587	9573	9603	9986	10042	10029	9701	10097		12842	3999	4054	4004	4006	3793	3884	3797		11729	7712	7797	7645	7508	7829	7616	7734		6071
		13551	9590	9633	9981	9994	9934	9723	9958		12848	4032	4096	3938	4034	3829	3796	3862		11704	7822	7762	7759	7603	7759	7655	7725		6124
		13612	9413	9680	9935	10115	9929	9784	9896		12882	4040	4047	3915	3952	3808	3857	3795		11638	7674	7751	7671	7554	7760	7688	7693		5892
		13608	9460	9682	9875	9972	10007	9728	10068		12810	3987	4042	3916	3998	3784	3843	3846		11636	7763	7757	7659	7523	7710	7644	7782		6045
		13738	9588	9776	9931	9894	9947	9791	9943		12798	4018	4046	3968	3999	3820	3893	3739		11701	7669	7754	7702	7576	7678	7630	7735		6051
		13685	9662	9631	9938	10033	9981	9722	10210		12860	3955	4015	3908	3962	3781	3814	3701		11712	7744	7819	7620	7402	7729	7593	7753		6144
		13610	9502	9663	9946	9886	9864	9637	9901		12757	3950	3995	3861	3963	3789	3812	3793		11692	7694	7717	7625	7506	7622	7626	7727		6011
		13586	9469	9556	9967	9951	9935	9663	9937		12799	3964	3977	3925	3932	3740	3763	3749		11566	7708	7671	7633	7476	7663	7542	7755		6078
		13613	9451	9597	9826	9978	9982	9646	9930		12759	3982	3932	3835	3918	3750	3807	3814		11731	7690	7743	7596	7420	7620	7600	7711		6073
		13635	9561	9741	9758	9905	9835	9573	9970		12823	3915	3992	3906	3915	3757	3765	3654		11567	7689	7683	7568	7501	7610	7584	7606		5941
		13514	9502	9586	9886	9937	9891	9650	9982		12806	3859	3977	3862	3914	3732	3757	3768		11583	7587	7682	7675	7426	7704	7577	7517		6037
		13632	9465	9683	9811	9994	9892	9692	9914		12751	3980	3998	3814	3920	3723	3802	3682		11689	7674	7724	7642	7551	7686	7566	7707		5963
		13562	9448	9506	9884	9910	9865	9608	9895		12765	3909	3931	3826	3855	3702	3733	3799		11635	7671	7677	7574	7448	7665	7481	7620		5955
		13622	9560	9537	9719	9945	9882	9671	9947		12902	3879	3945	3829	3847	3675	3756	3673		11709	7648	7725	7640	7484	7646	7549	7768		6014
		13687	9501	9546	9895	9953	9929	9620	9933		12685	3904	3931	3817	3860	3645	3677	3715		11657	7657	7675	7672	7414	7520	7550	7637		5918
		13716	9410	9562	9827	10015	9746	9618	9854		12662	3904	3862	3788	3837	3671	3786	3618		11729	7580	7674	7643	7414	7562	7588	7567		5965
		13687	9394	9594	9740	9939	9760	9560	9727		12698	3870	3891	3813	3828	3668	3719	3727		11702	7742	7631	7557	7397	7606	7603	7590		6015
		13556	9525	9574	9717	9932	9834	9613	9881		12743	3803	3886	3745	3808	3665	3718	3652		11636	7692	7664	7512	7392	7614	7519	7587		5947
		13550	9411	9560	9760	9956	9871	9604	9911		12673	3884	3893	3758	3793	3621	3710	3627		11818	7586	7642	7513	7310	7530	7481	7553		5994
		13553	9386	9504	9888	9891	9803	9521	9993		12813	3844	3888	3754	3755	3656	3675	3645		11662	7565	7627	7476	7368	7604	7583	7562		5918
		13527	9426	9503	9785	9873	9723	9631	9859		12687	3832	3862	3749	3788	3581	3692	3654		11638	7640	7584	7607	7468	7645	7580	7638		5926
		13490	9455	9390	9751	9766	9846	9499	9997		12840	3801	3825	3689	3781	3567	3664	3602		11747	7578	7597	7558	7550	7648	7404	7712		5942
		13657	9449	9518	9781	9885	9640	9601	9880		12749	3803	3823	3688	3735	3562	3660	3532		11649	7666	7634	7493	7425	7525	7442	7518		5882
		13545	9365	9508	9856	9881	9844	9539	9783		12677	3787	3878	3734	3760	3558	3645	3567		11770	7647	7571	7605	7411	7616	7454	7555		5908
		13510	9324	9600	9849	9860	9758	9582	9767		12791	3818	3818	3679	3781	3586	3638	3578		11804	7647	7578	7553	7434	7572	7507	7523		5825
		13596	9468	9498	9793	9925	9801	9433	9919		12857	3798	3817	3677	3709	3570	3637	3472		11677	7656	7607	7646	7421	7586	7489	7535		5976
		13539	9449	9550	9787	9965	9872	9541	9903		12718	3693	3778	3706	3778	3587	3612	3585		11616	7609	7611	7554	7290	7581	7453	7512		5979
		13650	9386	9376	9728	9834	9686	9508	9773		12909	3746	3791	3656	3738	3571	3573	3647		11590	7534	7656	7567	7421	7513	7438	7546		5899
		13540	9470	9555	9621	9897	9742	9443	9844		12707	3729	3775	3681	3703	3561	3566	3632		11669	7513	7514	7498	7410	7528	7476	7601		5895
		13588	9347	9430	9768	9758	9769	9589	9817		12747	3741	3765	3685	3678	3518	3590	3540		11590	7596	7577	7529	7360	7466	7433	7535		5908
		13660	9348	9348	9794	9828	9732	9475	9774		12727	3759	3759	3630	3709	3556	3541	3601		11624	7518	7657	7522	7414	7459	7370	7532		5954
		13457	9427	9408	9751	9832	9808	9485	9825		12694	3711	3781	3654	3744	3515	3542	3485		11631	7555	7544	7472	7304	7549	7507	7402		5979
		13679	9413	9406	9711	9875	9694	9366	9757		12730	3715	3771	3645	3638	3572	3565	3494		11623	7643	7633	7476	7372	7421	7415	7554		5907
		13674	9375	9383	9691	9719	9754	9535	9767		12615	3670	3721	3647	3681	3448	3551	3456		11604	7523	7529	7434	7318	7566	7360	7519		5798
		13497	9361	9443	9651	9811	9800	9448	9803		12743	3692	3728	3603	3679	3492	3602	3566		11631	7451	7474	7486	7320	7595	7344	7428		5912
		13582	9344	9358	9693	9744	9695	9375	9727		12696	3678	3706	3604	3680	3464	3542	3539		11666	7479	7491	7457	7270	7519	7451	7541		5816
		13431	9375	9354	9616	9801	9648	9459	9707		12671	3675	3742	3590	3645	3505	3519	3449		11691	7519	7552	7328	7314	7423	7441	7483		5844
		13470	9336	9258	9710	9818	9716	9386	9729		12629	3652	3662	3621	3618	3455	3496	3441		11622	7518	7473	7438	7280	7441	7444	7473		5829
		13584	9309	9272	9606	9737	9697	9356	9642		12689	3635	3714	3611	3631	3445	3484	3419		11579	7512	7365	7403	7282	7419	7360	7462		5897
		13523	9227	9354	9534	9683	9668	9355	9728		12687	3622	3635	3559	3605	3473	3490	3418		11680	7547	7427	7432	7304	7412	7310	7521		5916
		13551	9236	9302	9548	9740	9766	9392	9590		12797	3605	3677	3565	3633	3434	3514	3450		11641	7542	7569	7375	7199	7399	7379	7501		5857
		13623	9353	9376	9558	9826	9594	9412	9791		12694	3657	3647	3572	3587	3435	3446	3401		11684	7446	7474	7420	7241	7397	7363	7485		5860
		13516	9277	9380	9572	9716	9608	9300	9743		12645	3660	3678	3552	3557	3404	3499	3440		11638	7470	7491	7483	7355	7390	7296	7536		5783
		13492	9234	9335	9683	9785	9623	9417	9630		12794	3600	3685	3534	3593	3423	3478	3356		11604	7500	7477	7411	7302	7485	7278	7356		5828
		13517	9328	9341	9560	9753	9713	9414	9701		12790	3600	3622	3538	3597	3436	3474	3434		11616	7448	7424	7413	7288	7451	7345	7397		5758
		13066	2650	2521	2253	2649	2360	1987	2261		13829	1869	1828	1739	1513	1469	1873	1771		11316	2659	2960	2592	2459	2582	2725	2756		3210
		13027	2500	2314	2146	2406	2160	1840	2145		13669	1865	1788	1796	1587	1522	1889	1830		11324	2537	2727	2434	2284	2409	2521	2546		3050
		12801	2354	2236	2009	2269	2194	1796	2067		13808	1849	1821	1782	1589	1535	1979	1821		11254	2381	2596	2326	2243	2310	2366	2449		2876
		12743	2204	2186	1929	2156	2078	1716	2043		13709	1844	1805	1772	1590	1544	2003	1853		11372	2309	2505	2247	2126	2245	2242	2290		2745
		12887	2066	2048	1803	2047	1977	1644	1951		13442	1857	1802	1774	1578	1539	1995	1910		11474	2189	2357	2161	2066	2130	2153	2159		2611
		12872	1952	1969	1735	1934	1812	1594	1772		13576	1893	1815	1793	1575	1569	2052	1919		11325	2156	2276	2075	1987	2020	2027	2073		2544
		12766	1829	1831	1648	1837	1722	1480	1741		13523	1878	1840	1774	1577	1575	2057	1931		11216	2054	2140	1958	1899	1957	1948	2030		2489
		12855	1768	1733	1597	1781	1651	1427	1616		13691	1886	1837	1814	1578	1587	2089	1970		11384	2002	2095	1907	1863	1888	1853	1936		2339
		12761	1666	1657	1560	1671	1567	1375	1534		13646	1950	1871	1829	1626	1612	2107	1966		11240	2001	2038	1882	1807	1801	1834	1894		2311
		12833	1608	1589	1504	1597	1471	1325	1548		13712	1956	1883	1843	1639	1642	2137	2025		11190	1914	1974	1793	1732	1787	1767	1814		2232
		12826	1550	1524	1467	1549	1461	1288	1459		13652	1956	1878	1845	1655	1644	2194	1998		11145	1862	1919	1761	1692	1766	1729	1779		2168

## Sheet: Fig2E
EcoDMT-M235A
Lipid to protein ration 50
Manganese titration
NORMALIZED DATA
		Mn concentrations (uM)
	Time (min)	0	1	5	10	25	50	200	400	0	1	5	10	25	50	200	400	0	1	5	10	25	50	200	400	0	1	5	10	25	50	200	400	0	1	5	10	25	50	200	400	0	1	5	10	25	50	200	400
	-6.40167	117.011	109.064	119.828	119.419	128.152	130.72	155.866	166.214	108.418	108.904	117.873	125.006	127.44	133.567	151.886	173.671	111.98	109.469	112.095	121.128	130.583	126.501	145.271	156.17	106.877	111.33	116.054	123.292	129.766	134.023	151.943	158.619	104.055	110.755	126.403	129.258	127.995	137.837	142.71	156.202	113.255	113.342	124.184	119.784	133.257	143.859	163.236	167.817
	-6.335	112.635	107.79	115.907	116.842	125.891	130.605	152.92	162.833	107.339	108.162	115.989	123.451	129.276	132.946	149.352	174.403	110.335	104.864	110.082	116.917	127.892	127.178	143.468	155.956	105.9	108.984	114.421	120.105	127.771	134.072	152.024	155.416	102.386	108.567	125.195	127.952	126.763	135.227	141.532	152.119	111.037	109.555	124.47	118.117	133.925	143.958	162.129	165.176
	-6.26833	111.82	106.683	113.153	116.553	120.609	128.542	149.078	165.133	105.774	107.399	115.231	121.312	126.886	135.809	147.653	168.736	106.214	104.673	110.723	115.503	125.185	124.247	145.961	154.083	105.937	108.348	113.14	118.009	126.615	130.835	148.624	156.196	103.738	107.301	123.836	127.403	125.845	134.882	140.884	150.82	110.72	109.614	125.508	117.251	124.706	133.541	160.265	166.647
	-6.20167	110.532	106.203	112.382	114.533	120.826	130.812	144.006	158.731	106.916	105.788	115.874	119.635	127.691	132.46	147.25	170.296	105.113	102.956	109.187	112.458	121.431	122.492	138.731	150.713	103.226	108.169	109.339	120.301	123.079	130.981	149.622	156.14	102.323	107.969	122.275	126.071	123.748	137.407	141.09	151.5	108.166	107.089	121.889	117.013	127.333	132.397	145.273	163.074
	-6.135	109.074	103.397	111.412	113.234	116.804	129.344	147.464	160.837	106.874	104.007	115.759	119.684	125.327	130.813	148.546	168.704	104.025	101.458	107.562	113.332	121.463	125.664	139.774	149.911	104.554	107.195	109.587	119.101	122.353	131.492	146.087	153.745	102.175	108.222	121.923	126.515	123.748	132.014	141.09	146.675	108.24	108.254	118.756	117.186	124.015	132.273	143.274	162.294
	-6.06833	107.198	103.637	109.099	111.647	118.348	125.034	144.8	158.065	105.034	104.622	116.448	121.142	125.101	130.516	146.876	165.234	103.753	101.866	106.786	112.779	122.946	118.467	139.226	147.147	103.319	106.44	109.36	119.625	122.693	129.813	146.789	154.664	102.619	105.136	124.566	125.157	122.569	134.538	139.352	146.52	110.291	110.235	118.38	114.848	125.19	134.958	144.057	163.765
	-6.00167	106.876	103.101	107.821	111.338	117.913	126.249	142.649	157.567	104.124	104.198	116.563	119.854	124.547	132.541	147.135	159.981	101.441	98.7466	106.025	112.691	118.176	123.571	134.647	147.486	101.549	105.784	108.76	117.835	122.489	130.032	146.411	150.682	101.964	106.034	119.557	125.94	123.408	133.993	138.704	146.397	108.52	105.496	118.8	115.866	124.038	129.463	145.543	160.192
	-5.935	105.834	101.809	106.808	111.276	117.087	122.49	139.805	156.486	102.94	102.374	111.303	120.559	121.479	129.301	147.25	164.47	99.9864	98.842	106.726	107.956	120.238	117.775	135.796	144.08	99.5944	107.176	109.05	116.023	120.109	128.085	145.089	153.049	100.739	104.468	121.118	124.242	121.415	133.419	138.586	147.324	106.152	107.73	117.741	117.468	120.235	134.038	144.625	160.372
	-5.86833	105.228	100.665	108.746	110.019	112.848	121.848	143.135	155.1	101.713	101.314	112.497	117.23	119.794	127.842	145.062	161.063	97.2668	94.8229	104.087	106.251	114.679	115.36	132.42	139.818	102.397	105.148	107.231	115.062	119.497	129.423	143.416	150.794	99.7254	102.902	121.646	124.451	123.145	134.337	136.642	144.633	106.115	106.292	119.44	112.814	121.226	133.043	145.543	163.705
	-5.80167	105.152	99.28	104.318	108.967	114.674	122.1	136.424	154.601	100.169	101.632	108.155	115.869	118.763	127.221	143.046	165.107	97.2804	97.5749	105.116	104.298	118.063	116.117	129.15	139.301	99.7603	105.327	105.103	113.774	120.063	125.602	145.521	150.571	97.529	105.343	120.866	123.851	120.813	133.161	137.349	147.324	105.5	107.827	118.998	114.827	123.853	129.985	144.733	163.915
	-5.735	102.955	98.0801	105.442	110.616	111.5	119.509	137.756	152.855	97.9907	98.2192	109.212	114.629	118.335	127.005	144.688	163.069	97.1444	97.8338	102.625	106.673	116.822	115.553	130.122	139.034	99.1335	103.657	106.281	114.407	117.615	127.209	141.743	149.373	97.3178	102.211	119.532	118.809	119.24	131.469	135.052	143.767	105.22	107.807	117.917	117.143	122.609	129.935	141.302	160.192
	-5.66833	104.793	97.7848	106.874	106.947	114.891	118.936	138.397	146.397	103.151	100.276	110.039	114.046	121.152	124.818	142.557	159.153	97.1172	97.4932	103.4	104.561	115.227	113.653	130.281	138.873	98.8754	102.047	103.595	113.272	116.89	126.478	139.099	146.811	98.0148	102.948	117.191	120.481	119.083	130.063	133.461	143.18	103.859	106.914	119.484	113.68	122.839	134.485	143.058	158.691
	-5.60167	101.856	98.7078	104.737	106.885	112.826	118.294	137.474	149.252	98.9848	98.3252	107.581	116.039	119.09	122.603	139.908	159.217	98.3274	95.8311	103.684	102.142	113.294	114.748	125.473	133.666	98.1379	101.073	106.921	113.098	117.819	126.235	140.853	144.444	98.6272	101.612	117.09	117.372	116.042	128.141	134.728	144.355	106.432	105.632	120.344	115.563	120.051	131.527	143.301	159.021
	-5.535	102.33	97.6001	105.882	106.308	112.587	120.128	134.068	149.418	97.7792	99.0884	110.521	113.244	118.863	124.575	136.424	161.827	97.43	95.0136	102.893	104.255	114.083	113.54	127.895	133.22	97.7139	102.226	102.355	111.067	114.441	122.317	138.451	144.946	97.5502	102.649	114.976	117.503	117.143	128.141	131.753	141.386	105.481	105.71	119.417	115.649	121.434	131.029	142.572	159.862
	-5.46833	102.141	96.6956	103.878	104.143	112.674	115.497	134.401	144.651	99.4501	98.9612	108.04	113.56	117.455	122.144	138.929	160.076	98.7354	93.515	99.8061	105.741	111.054	108.211	128.407	137.054	96.6445	101.65	101.364	112.29	115.325	123.582	140.178	143.442	96.3252	100.783	115.681	117.346	113.552	127.194	130.781	142.932	103.878	105.263	119.925	116.667	117.239	131.079	142.923	161.213
	-5.40167	102.065	96.1233	102.666	105.937	111.5	119.326	132.249	145.649	99.5558	96.8624	108.546	111.519	117.279	123.548	138.785	156.129	95.499	94.4823	102.953	101.923	116.194	113.83	125.561	136.163	96.0177	99.3639	100.579	111.155	114.01	123.169	136.994	144.444	94.7835	100.115	116.939	115.439	114.653	127.194	130.545	140.643	104.53	106.312	119.175	115.671	123.162	131.999	143.058	160.042
	-5.335	102.197	95.6064	105.904	105.339	110.391	116.667	130.917	146.286	97.0178	98.0708	102.963	113.487	116.625	123.602	138.123	155.014	97.4028	94.891	100.134	102.127	115.678	112.735	126.145	135.164	94.2662	98.0123	102.066	109.539	116.527	120.467	134.674	144.389	95.755	98.8485	115.706	116.379	115.098	125.33	132.106	138.602	103.635	107.594	119.064	115.195	121.48	128.245	141.977	158.451
	-5.26833	98.996	94.0927	102.886	104.391	111.13	117.309	132.044	148.808	96.1294	98.6644	105.307	113.341	115.216	122.63	137.086	151.735	94.7648	93.842	101.447	101.749	109.813	108.179	125.756	134.914	95.944	97.9129	100.269	109.146	112.242	121.538	136.589	140.072	96.114	99.1248	114.145	119.148	112.949	127.367	131.311	142.314	102.554	103.069	119.395	113.766	120.442	127.797	138.628	156.139
	-5.20167	99.6211	95.5141	100.815	103.34	110.978	116.185	135.092	145.344	96.1083	96.396	105.353	111.932	115.87	120.686	138.295	153.582	95.1183	93.7466	100.447	102.812	112.359	114.925	128.071	132.525	93.6947	98.4894	100.847	108.426	110.723	119.007	136.751	143.191	94.3823	98.8715	116.511	117.999	115.02	124.24	131.429	140.52	102.89	106.409	119.285	116.299	120.996	126.504	142.41	158.751
	-5.135	100.379	95.8649	101.586	104.391	112.283	114.993	135.143	141.297	95.8968	97.244	104.457	107.947	114.537	122.387	133.429	157.179	94.0577	94.3188	100.91	100.306	109.475	113.573	126.41	132.882	93.9159	97.3961	100.269	107.029	111.698	122.317	134.269	141.158	93.6853	97.1442	112.358	116.353	112.398	124.986	129.985	139.097	101.715	106.292	118.071	111.472	121.111	125.982	142.328	156.139
	-5.06833	99.337	93.3912	102.534	105.545	111.043	110.683	131.071	143.21	96.764	96.9684	106.249	110.595	111.544	120.335	135.589	150.939	95.2135	93.1335	104.072	101.545	111.005	109.837	127.223	135.663	92.8097	96.939	98.8223	106.003	110.542	119.908	133.783	139.153	94.8046	99.0557	113.038	115.935	111.245	121.572	129.396	135.416	102.405	105.38	116.946	112.013	117.861	127.101	140.411	160.282
	-5.00167	99.7537	94.8311	105.684	106.061	109.783	116.942	126.844	143.404	93.7394	93.6188	106.386	110.304	112.022	120.173	132.623	152.117	92.6299	95.0681	101.581	101.734	111.747	113.927	122.645	132.507	93.4919	94.5736	99.6488	105.152	109.091	115.6	129.601	138.457	93.8965	96.5454	109.917	116.353	111.822	124.125	126.186	135.602	102.89	105.749	116.659	113.636	120.051	127.648	140.059	160.042
	-4.935	100.246	95.0895	102.6	103.504	111.739	117.4	132.505	150.388	97.7369	95.0392	104.342	112.296	114.034	120.308	137.576	152.627	95.6078	92.0436	99.821	99.2569	113.132	112.591	122.768	130.064	93.0494	94.2357	97.9132	104.519	110.564	116.111	132.353	138.624	92.397	97.052	111.503	115.047	110.039	122.576	124.242	135.756	102.144	104.37	117.321	112.662	119.498	125.286	137.223	151.666
	-4.86833	97.7837	93.8711	103.855	105.174	109.065	115.566	132.428	142.905	93.824	93.3008	104.618	111.081	113.028	121.658	136.078	154.314	89.9646	92.7793	100.089	102.084	108.911	110.642	125.756	130.67	91.1504	94.1562	97.9545	105.828	106.915	115.43	129.304	137.789	90.6019	97.4666	111.05	114.394	109.541	123.896	127.57	137.767	101.324	104.117	116.549	111.883	119.382	126.554	142.491	156.83
	-4.80167	98.5035	93.4096	102.666	101.587	111.391	117.033	132.633	142.572	91.6878	94.7212	103.722	110.158	111.343	118.985	134.466	152.722	90.8485	91.2398	96.525	98.2078	110.941	112.301	124.342	132.882	91.9248	92.7052	98.1818	104.453	108.456	114.991	130.059	136.202	92.9461	94.749	110.194	114.681	109.882	123.982	124.978	136.808	100.056	105.03	114.85	110.584	119.152	127.723	135.683	153.077
	-4.735	97.329	95.3849	102.71	105.339	110.935	113.87	135.579	143.598	94.6489	93.7672	104.549	108.165	113.984	118.688	133.026	147.628	91.7596	93.8147	99.9254	101.341	109.04	108.453	120.7	132.917	90.7817	92.6456	97.6446	104.3	107.096	114.31	129.223	134.726	92.1014	95.9696	109.615	113.871	109.253	120.97	125.184	136.499	101.342	104.797	115.755	109.654	117.354	126.927	137.169	153.527
	-4.66833	98.5035	91.379	103.415	106.081	109.391	112.861	134.862	144.9	92.5973	92.8344	100.758	106.829	113.38	119.957	137.489	149.729	92.6707	93.5014	98.091	100.568	111.843	111.721	124.377	132.596	90.5605	92.8642	96.9835	103.449	108.071	113.799	127.577	135.45	91.7001	94.4496	110.647	112.356	110.433	122.691	125.803	135.014	100.895	104.312	116.946	109.784	119.544	123.744	138.493	157.55
	-4.60167	98.011	93.7973	103.106	103.628	108.152	116.094	132.889	143.986	94.2682	94.7	102.665	110.061	111.896	119.552	132.623	148.233	91.95	92.9837	100.373	98.3972	110.264	107.036	127.594	131.687	91.5007	93.0233	96.343	103.122	108.071	111.511	128.602	134.67	90.9609	93.5053	109.061	114.185	108.021	119.851	122.798	134.488	100.541	103.399	115.909	110.325	115.326	123.521	139.573	155.059
	-4.535	97.6511	94.8126	102.556	103.36	108.152	112.311	130.866	142.35	94.1624	93.1524	104.204	106.367	111.896	116.878	129.312	154.187	91.6644	94.8365	99.8807	102.054	110.361	111.045	123.334	131.776	88.4956	91.8704	96.8802	100.96	107.277	111.876	128.225	134.252	90.5597	97.1211	109.69	111.729	105.924	120.884	122.003	134.766	100.261	101.826	114.872	112.619	117.884	125.982	136.008	154.848
	-4.46833	96.6092	91.8959	100.397	101.402	107.826	113.388	130.379	141.325	92.1743	93.322	102.849	107.412	112.651	117.364	131.097	147.055	88.4417	92.1526	97.5541	97.1295	105.575	109.032	123.316	127.71	89.0671	90.3796	97.1281	104.017	105.486	113.069	129.924	133.445	89.5037	92.6301	108.91	110.554	106.815	119.621	122.769	132.725	102.125	102.661	112.467	106.515	116.617	125.709	138.196	156.199
	-4.40167	96.2682	92.6528	100.705	103.546	109.239	115.337	131.148	145.205	94.1413	92.0288	103.055	109.137	111.62	118.39	132.047	147.883	90.3318	94.0327	95.1529	99.286	107.976	106.311	120.311	126.623	90.3577	92.8841	95.5992	101.222	106.756	113.264	128.09	131.328	89.9683	94.3344	108.784	111.494	108.231	122.92	121.06	133.313	101.137	101.767	113.261	109.935	115.672	124.838	138.115	152.056
	-4.335	95.7189	92.6712	102.181	101.773	107.261	116.002	132.428	143.487	93.8452	92.9828	100.62	106.318	107.772	115.204	127.325	151.608	93.269	92.5068	98.7472	97.7707	110.844	110.739	120.965	129.476	87.8319	93.2618	95.5372	101.113	105.373	111.682	123.071	132.554	88.7645	94.5187	105.638	111.311	108.965	118.158	123.181	130.22	100.485	104.35	111.959	111.234	118.092	126.579	137.52	152.747
	-4.26833	97.329	93.7419	98.8984	104.123	107.652	111.417	130.943	142.794	91.4552	90.0784	102.55	103.621	112.752	114.043	125.166	150.302	91.6916	90.7357	99.2543	97.3044	109.185	107.052	122.591	130.456	88.2006	91.5126	96.5083	98.9522	105.894	112.314	125.283	131.913	86.1668	94.2883	106.871	111.155	107.444	117.642	122.68	134.736	100.634	103.593	113.327	110.476	117.907	123.222	138.169	151.876
	-4.20167	95.9273	91.8405	100.022	103.917	107.826	115.406	131.301	142.323	90.6514	92.4952	99.196	107.315	108.954	113.935	131.068	147.533	90.5902	91.9619	96.5548	95.3227	108.46	108.179	122.591	129.333	87.9609	90.7176	96.095	101.921	104.965	111.365	125.202	132.136	89.1658	93.0216	105.99	109.352	106.37	117.04	120.236	132.045	103.02	104.583	112.357	110.216	117.677	125.46	138.52	154.098
[truncated: 290 more rows]
[truncated: 41 more columns]

## Sheet: Fig2F
EcoDMT-M235A
[truncated: 330 more rows]

## Sheet: Fig2G-titration
EcoDMT-M235A
[truncated: 328 more rows]

## Sheet: Fig2G-Km-calculation
EcoDMT-M235A
[truncated: 13 more rows]

[truncated: 7 more sheets: Fig2H, Fig2I, Fig2J, Fig2K, Fig2L-titration, Fig2L-Km-calculation, Sheet1]
