# Supplementary material for: Structural and functional properties of a magnesium transporter of the SLC11/NRAMP family
Source: eLife journal article supplement (doi:10.7554/elife.74589), 2022-01-10
Supplement: supp [file Figure2_supplement1.xlsx]

## Sheet: Mn
Empty Liposomes
POPE:POPG
Mn2+
		Mn2+ (uM)					Mn2+ (uM)					Mn2+ (uM)							Mn2+ 400 uM
NORMALIZED DATA	Time (min)	400					400					400						Time (min)	Mean	SEM	N
	-6.36842	109.493	116.225	116.028	116.492		108.757	109.615	112.02	109.988		100.34	98.2496	98.1315	97.7258			-6.36842	107.755	2.10649	12
	-6.3013	112.842	113.546	117.882	119.682		110.61	106.63	112.054	107.181		99.1391	100.114	96.4881	98.5061			-6.3013	107.889	2.26527	12
	-6.23463	113.305	111.866	114.112	114.627		108.926	108.519	106.91	108.474		99.2977	99.318	97.8838	95.786			-6.23463	106.585	1.95696	12
	-6.16797	112.319	113.319	113.551	115.413		108.757	108.654	111.043	109.444		97.6665	98.1359	97.3886	95.8082			-6.16797	106.792	2.11928	12
	-6.10155	111.257	110.292	113.458	114.488		109.784	106.073	108.368	106.279		98.8446	100.023	95.8352	97.9264			-6.10155	106.052	1.84462	12
	-6.0349	109.777	112.396	112.695	114.411		107.78	107.675	105.556	107.385		100.091	98.4087	96.1279	98.8629			-6.0349	105.93	1.78317	12
	-5.96797	106.847	111.246	112.586	115.613		106.399	110.223	109.619	105.734		100.023	98.977	98.6042	98.8406			-5.96797	106.226	1.7091	12
	-5.90155	109.912	109.475	112.819	110.558		107.023	107.743	107.116	102.893		96.783	98.4769	96.3755	96.4103			-5.90155	104.632	1.76953	12
	-5.8349	108.028	108.642	111.822	110.342		106.383	106.933	105.367	103.914		96.2845	97.6131	96.2855	95.8974			-5.8349	103.959	1.69851	12
	-5.76797	108.312	107.734	107.928	108.708		106.214	106.748	107.287	105.139		100.295	97.113	97.4786	97.6366			-5.76797	104.216	1.34367	12
	-5.70157	107.43	106.811	110.919	111.575		106.602	105.516	108.968	104.866		98.3009	98.6588	94.6421	95.6968			-5.70157	104.165	1.68912	12
	-5.63463	106.01	108.128	109.938	110.666		104.294	108.114	105.316	102.688		99.6602	98.3178	95.7001	95.5853			-5.63463	103.701	1.53489	12
	-5.56798	105.053	106.69	106.106	108.431		107.073	104.555	103.927	103.08		98.2782	98.3178	97.2535	96.9677			-5.56798	102.978	1.20122	12
	-5.5013	103.827	105.222	106.885	109.017		103.739	106.275	103.206	100.868		97.0548	98.7724	94.4845	96.9231			-5.5013	102.189	1.31296	12
	-5.4349	104.829	105.025	104.174	108.97		103.907	104.47	104.544	102.11		98.3462	97.5904	94.3494	96.7893			-5.4349	102.092	1.24641	12
	-5.36823	104.515	102.27	103.255	104.886		101.819	105.145	105.83	101.923		98.3915	96.1128	95.7902	96.3434			-5.36823	101.357	1.08074	12
	-5.30132	101.076	103.088	103.785	106.859		102.375	105.752	102.555	99.1662		96.7603	96.9084	96.353	95.4515			-5.30132	100.844	1.11296	12
	-5.23465	102.527	103.86	102.726	105.333		102.93	104.96	103.258	101.14		96.5111	96.9993	95.52	95.6299			-5.23465	100.949	1.07229	12
	-5.168	101.704	101.287	103.396	104.146		101.886	103.627	101.698	99.3024		98.5727	98.0223	94.507	96.0981			-5.168	100.354	0.884226	12
	-5.10132	101.405	99.8184	100.561	105.102		100.354	102.868	98.5597	98.0092		98.1423	97.7722	98.0864	96.99			-5.10132	99.8056	0.693142	12
	-5.03465	98.7143	99.6216	100.903	102.713		101.886	103.07	100.617	97.7199		99.8188	96.1355	96.5106	95.9643			-5.03465	99.4729	0.721061	12
	-4.96798	101.271	99.2735	100.343	102.266		99.1748	101.366	99.6571	98.5707		98.8672	97.8404	95.5876	97.369			-4.96798	99.2988	0.540346	12
	-4.90132	96.5167	98.7438	100.592	102.173		96.9855	102.547	101.132	98.3155		97.9157	98.2723	96.3305	95.3623			-4.90132	98.7405	0.683937	12
	-4.8349	99.5964	97.8356	99.4237	101.279		98.9054	101.468	100.96	98.2134		96.9415	98.3633	96.3305	96.8116			-4.8349	98.844	0.506858	12
	-4.76822	99.1778	97.5481	100.265	102.482		98.4338	101.113	99.8628	98.0602		96.9869	98.3405	96.5781	96.0981			-4.76822	98.7455	0.552349	12
	-4.70157	96.8456	96.3675	98.3178	100.647		97.8444	98.7348	98.6626	94.7762		97.8024	97.8859	94.6646	97.2129			-4.70157	97.4802	0.485053	12
	-4.6349	93.3473	97.1697	98.6916	98.9211		96.3961	100.86	96.965	95.2697		96.6697	98.1814	94.6421	97.3467			-4.6349	97.0384	0.586155	12
	-4.56797	95.4702	96.0194	95.8255	98.9519		97.0866	98.836	98.0796	93.9595		96.5338	98.8406	95.0698	96.0312			-4.56797	96.7253	0.473896	12
	-4.5013	93.138	96.0799	99.19	98.1042		96.194	97.554	95.9705	93.9425		97.3267	96.5219	95.4075	96.9008			-4.5013	96.3608	0.485554	12
	-4.43463	93.6164	96.4583	95.3271	98.7207		96.3287	95.9008	97.4451	93.9255		99.0258	99.5454	95.3624	96.5886			-4.43463	96.5204	0.546926	12
	-4.36797	94.4835	95.6713	98.0997	96.8866		95.1162	95.4453	95.3875	92.4111		99.2977	97.6358	96.2629	93.2887			-4.36797	95.8322	0.567955	12
	-4.30132	94.5283	94.7631	99.0966	99.0444		92.2028	94.3151	94.9588	94.0786		98.1196	96.9311	94.7321	96.0981			-4.30132	95.7391	0.620033	12
	-4.23465	92.5998	94.5361	95.3427	96.7478		94.5605	93.691	94.2044	92.1048		97.3267	98.045	95.9703	92.5975			-4.23465	94.8105	0.557582	12
	-4.16798	94.3938	92.4171	93.6916	96.1005		91.546	95.3273	94.1187	94.1637		98.2782	99.7727	96.7132	95.3177			-4.16798	95.1534	0.672817	12
	-4.1013	94.3041	94.0215	93.2555	95.1911		92.3543	93.1174	92.1639	91.203		97.9157	98.6361	96.9833	96.4771			-4.1013	94.6353	0.695045	12
	-4.03438	91.344	92.1447	93.676	95.4377		91.2428	91.0425	90.8093	93.1087		98.1423	94.3851	94.8447	96.4771			-4.03438	93.5546	0.684059	12
	-3.96773	91.4038	91.6301	92.9907	92.2781		91.6807	93.5054	92.1639	88.3614		98.9352	97.9313	95.3399	95.4961			-3.96773	93.4764	0.860254	12
	-3.90132	91.1795	92.0993	95.5452	94.1584		94.291	90.7389	92.1639	91.4752		97.3947	97.5449	96.2629	94.6934			-3.90132	93.9623	0.696964	12
	-3.83438	91.5084	90.0711	95.5763	92.3551		90.7039	89.2713	94.5988	90.1651		99.4789	96.6129	95.4525	94.4705			-3.83438	93.3554	0.910025	12
	-3.76772	89.4454	91.5393	93.271	92.0006		93.0785	91.4305	90.0034	89.7737		97.8024	96.431	96.0828	96.5663			-3.76772	93.1188	0.846509	12
	-3.70105	89.6846	90.5403	92.6324	92.1085		91.5965	91.1775	91.0322	92.4962		99.343	96.2946	97.5236	96.544			-3.70105	93.4145	0.910543	12
	-3.63438	88.2942	90.843	92.7414	94.2201		90.064	92.139	90.3464	88.4465		98.029	96.7038	95.1598	94.7826			-3.63438	92.6475	0.916393	12
	-3.56798	88.4437	90.1165	90.2336	90.7676		92.4217	91.2281	93.1584	91.9857		98.3462	98.1587	96.6231	95.3177			-3.56798	93.0668	0.952976	12
	-3.50105	89.1314	90.5252	90.7788	90.8909		90.0135	90.7389	90.5864	88.4635		97.8251	96.2719	96.6457	95.2954			-3.50105	92.2639	0.941285	12
	-3.4344	87.7411	87.9219	89.1277	92.1393		90.2661	92.004	89.7291	88.1742		97.4626	97.8859	96.308	95.4515			-3.4344	92.0176	1.10368	12
	-3.36772	87.3972	89.0722	90.919	92.2935		89.0199	91.4474	90.655	88.2253		97.4853	96.6583	95.8352	95.4961			-3.36772	92.042	1.01113	12
	-3.30105	86.7544	90.5101	91.1371	90.783		89.9461	92.9318	89.4547	88.6166		97.8478	97.1357	95.8802	96.99			-3.30105	92.3323	1.08075	12
	-3.2344	86.6497	90.0409	91.3707	90.074		88.3462	90.5702	91.118	89.2973		99.0485	97.4994	97.0509	95.5853			-3.2344	92.2209	1.16043	12
	-3.16773	85.8723	88.0581	90.1246	91.2608		88.2115	90.9582	91.7524	89.1782		98.5501	95.5217	95.9027	95.8974			-3.16773	91.774	1.12049	12
	-2.14453	81.7761	81.7164	86.4953	86.6831		103.065	102.429	102.761	103.199		114.024	116.14	112.9	115.964			-2.14453	100.596	3.82716	12
	-2.0817	79.0103	80.4601	84.8754	85.2805		104.075	99.865	101.852	98.7409		117.15	115.935	112.81	115.719			-2.0817	99.6478	4.12602	12
	-2.01895	79.1299	80.0969	86.0436	85.7737		103.503	100	100.086	97.9922		117.195	115.094	111.706	113.735			-2.01895	99.1963	3.97589	12
	-1.95617	78.6814	80.1423	84.5483	85.2189		100.724	97.5877	97.1536	99.0982		115.723	116.958	114.205	113.712			-1.95617	98.6461	4.10462	12
	-1.89342	77.9489	79.6125	84.6106	84.4945		102.307	101.299	99.6742	98.6217		115.541	113.685	114.34	113.601			-1.89342	98.8114	4.07381	12
	-1.83067	79.3093	78.4925	85.8879	85.0339		103.621	100.489	99.6914	99.8128		115.247	116.981	113.958	113.623			-1.83067	99.3455	4.10413	12
	-1.7679	78.9655	79.5369	84.9221	83.9088		99.3937	101.451	101.629	99.9319		116.561	115.322	113.192	113.467			-1.7679	99.0234	4.08764	12
	-1.70515	79.1299	80.9142	82.1184	83.2306		103.958	99.359	98.954	99.2683		117.422	114.549	110.873	115.184			-1.70515	98.7467	4.14109	12
	-1.64238	79.3691	80.2785	83.6137	84.4945		102.492	99.4771	101.269	98.7579		115.655	117.868	112.967	114.582			-1.64238	99.2353	4.14804	12
	-1.57962	80.1316	80.4601	84.5327	84.6023		102.206	96.2551	99.0912	97.3966		117.422	116.686	112.697	115.585			-1.57962	98.9221	4.12997	12
	-1.51685	78.8459	80.6266	84.3925	83.246		101.701	100.877	98.4739	95.9503		116.923	115.754	111.639	114.247			-1.51685	98.5564	4.09872	12
	-1.4541	78.9505	79.7488	84.704	84.3403		101.836	100.978	103.738	98.3495		116.38	115.322	113.552	114.025			-1.4541	99.327	4.11149	12
	-1.39133	77.9339	80.3088	84.19	83.5697		101.583	99.7301	99.5713	99.0812		114.25	115.435	114.07	116.968			-1.39133	98.8909	4.18384	12
	-1.32858	79.5635	79.2039	83.3645	83.1843		99.579	96.913	97.7538	96.3417		114.998	116.413	114.52	115.92			-1.32858	98.1462	4.22396	12
	-1.26583	78.502	80.5812	84.0966	84.2478		101.179	98.1444	97.2737	95.8142		115.904	115.367	111.616	115.295			-1.26583	98.1685	4.07115	12
	-1.20305	76.9024	79.2039	82.8505	83.5697		101.145	99.224	99.2455	96.4608		114.454	116.072	111.796	113.913			-1.20305	97.9031	4.16718	12
	-1.1403	78.2927	78.2352	83.5358	83.0919		99.8316	98.4987	99.7599	95.3037		116.742	114.731	112.224	116.276			-1.1403	98.0436	4.25688	12
	-1.07755	78.0386	79.4158	82.352	83.4926		101.061	96.8286	100.48	94.7422		115.904	113.503	112.449	115.808			-1.07755	97.8396	4.18616	12
	-1.01478	79.1897	78.6893	82.2897	80.8416		99.6969	97.4528	95.8505	97.0223		114.182	113.867	109.5	113.802			-1.01478	96.8653	4.04222	12
	-0.952017	77.4555	80.7023	83.8474	82.8298		99.5453	96.0864	96.9307	95.8993		115.088	113.98	111.324	112.865			-0.952017	97.2129	3.9903	12
	0	100	100	100	100		100	100	100	100		100	100	100	100			0	100	0	12
	0.0626333	98.7293	99.9395	100.53	100.293		98.6864	97.3009	100.652	97.3966		103.693	100.091	100.27	100.713			0.0626333	99.8578	0.493762	12
	0.1254	99.1927	96.3675	95.6698	96.2855		95.4699	97.166	97.1022	99.6086		100.702	98.3633	99.5723	100.022			0.1254	97.9602	0.528901	12
	0.18815	96.9502	96.9275	99.4704	97.1948		97.777	96.1707	98.2339	96.1375		98.2102	99.8409	98.1765	98.796			0.18815	97.8238	0.344959	12
	0.2509	96.9801	97.881	95.0467	98.0425		97.5918	96.3394	97.1879	98.1964		101.269	100.705	98.4917	98.3278			0.2509	98.0049	0.49043	12
	0.313667	97.2044	97.3362	95.6542	97.6726		100.64	97.1154	98.7997	94.555		98.8219	98.8861	98.4466	99.5987			0.313667	97.8942	0.484801	12
	0.376433	98.2359	96.4129	97.648	93.0179		98.0465	96.8455	96.4678	96.5459		98.7313	99.068	98.7843	99.6878			0.376433	97.4576	0.514391	12
	0.439183	96.3522	96.428	96.9315	97.0561		97.0866	95.9683	97.2222	93.3469		99.6375	100.296	98.1315	98.1048			0.439183	97.2134	0.514868	12
	0.50195	92.6745	98.6227	97.1651	94.7596		97.1539	96.7443	98.0624	97.5838		97.6212	99.8181	97.7488	98.4615			0.50195	97.2013	0.539966	12
	0.5647	94.7526	95.6259	96.7757	96.3779		94.7625	93.5897	98.7997	95.8142		98.5274	99.1589	97.9514	98.7737			0.5647	96.7425	0.542907	12
	0.627467	93.6612	94.5058	96.1838	91.4303		97.3729	96.6093	96.4335	96.4778		98.4141	100.159	97.321	100.045			0.627467	96.5511	0.722346	12
	0.690233	94.5881	94.7934	95.3427	93.6498		97.5581	93.5391	94.0158	94.5891		99.5242	101.023	97.0284	98.3055			0.690233	96.1631	0.715204	12
	0.752983	93.8406	95.4442	95.0623	94.0197		95.4025	94.9055	96.7421	94.7422		98.9579	98.5224	95.6101	97.0346			0.752983	95.857	0.47313	12
	0.815733	93.8855	94.1426	95.4984	91.9236		95.3183	95.5128	95.5418	92.1899		97.7571	99.2726	96.5106	96.5663			0.815733	95.3433	0.611893	12
	0.8785	92.5848	95.3837	93.1464	93.4803		96.4635	94.7537	94.0501	94.1126		101.541	98.4769	98.4466	98.7737			0.8785	95.9344	0.807769	12
	0.941267	91.4935	94.9902	94.9533	91.1837		96.9013	93.4379	94.513	94.7933		99.343	100.023	98.0189	98.796			0.941267	95.7039	0.84774	12
	1.00402	91.3888	93.7491	92.3676	92.8329		95.9751	93.0837	92.7641	93.0747		97.1454	100.409	96.6907	98.3946			1.00402	94.823	0.813842	12
	1.06678	92.9885	92.7955	92.2118	92.1547		95.4193	95.8839	95.9019	92.7344		97.372	96.5674	97.2535	97.9487			1.06678	94.936	0.63655	12
	1.12953	93.6164	92.4474	93.785	90.3977		96.0593	93.5729	92.3525	92.7004		99.0032	98.1587	96.6907	98.1494			1.12953	94.7445	0.800284	12
	1.1923	90.5965	92.7804	91.3707	92.1547		96.2614	93.4548	94.8731	95.2697		97.1228	99.2498	97.276	96.3211			1.1923	94.7276	0.769959	12
	1.25507	90.3274	91.6906	93.8318	89.889		94.3415	96.5418	92.6097	92.8875		96.783	98.045	96.3305	95.2285			1.25507	94.0422	0.761396	12
	1.31782	91.942	93.4766	93.6916	91.1683		95.874	92.9825	94.3416	92.5302		96.3978	97.8859	97.2985	96.9454			1.31782	94.5445	0.653047	12
	1.38058	89.3407	90.7522	92.7103	88.733		94.4257	93.1174	93.7757	94.8443		98.0517	97.9995	96.3305	96.1427			1.38058	93.852	0.894242	12
	1.44333	91.7327	93.6582	91.9782	91.492		95.5372	93.8934	91.5295	96.1715		96.3525	98.1359	94.5295	95.9866			1.44333	94.2498	0.645188	12
	1.5061	88.8623	91.0398	90.81	91.0604		91.7144	93.3873	95.4904	94.8954		95.0838	98.6361	95.1148	96.8785			1.5061	93.5811	0.837966	12
	1.56887	90.5666	92.3566	92.757	90.3514		95.1162	92.3583	94.4444	92.9386		97.3267	96.8857	95.8577	96.165			1.56887	93.927	0.685785	12
	1.63162	90.7759	91.3274	92.8193	87.4692		96.0088	95.1586	94.8217	92.7344		96.5338	99.068	97.321	95.0948			1.63162	94.0944	0.927129	12
	1.69438	90.5816	91.4031	93.0218	89.6732		92.3038	92.5607	93.7414	93.3469		98.0517	97.9995	95.6551	96.6109			1.69438	93.7458	0.801243	12
	1.75713	92.1961	90.9793	91.7134	86.8989		95.6551	94.0452	94.9931	92.6153		95.9447	96.7947	95.3174	94.136			1.75713	93.4408	0.79426	12
	1.8199	88.8773	90.4495	91.9938	89.6116		93.129	95.0742	91.3237	93.8914		96.6244	99.0452	96.0153	95.0948			1.8199	93.4275	0.891404	12
	1.88265	89.4753	91.0701	92.3676	89.3804		93.3479	91.8016	93.1927	92.8195		98.686	98.3633	97.0509	97.146			1.88265	93.7251	0.952118	12
	1.94542	92.226	90.9187	90.3271	90.4593		95.1667	92.7463	94.9074	92.3771		98.4368	98.7497	95.8577	94.0914			1.94542	93.8554	0.828066	12
	2.00818	88.8025	91.0247	89.3146	90.1819		93.6174	92.8981	94.6845	95.0145		96.126	96.0446	96.8258	95.0056			2.00818	93.295	0.811784	12
	2.07093	89.2361	92.1144	89.0031	90.5518		94.7962	93.0668	94.4273	93.1257		97.9384	97.6358	96.7357	96.7447			2.07093	93.7813	0.907607	12
	2.1337	89.9836	90.4949	91.1838	89.9199		93.449	93.0837	95.0103	94.2998		98.4594	98.6815	96.6231	95.0725			2.1337	93.8551	0.89117	12
	2.19645	90.3274	91.6906	90.5452	88.6868		93.1458	91.2955	94.8217	93.8914		97.7345	97.5222	94.5295	96.4548			2.19645	93.3871	0.85222	12
	2.25923	90.8208	91.0549	89.2835	88.2244		92.8259	93.0162	94.1015	92.1899		96.715	98.4315	96.443	95.3177			2.25923	93.202	0.900715	12
	2.32197	88.5932	89.8895	89.7196	87.6387		94.2405	90.9582	95.1475	95.4569		98.2782	97.0902	95.8127	95.1171			2.32197	93.1619	1.03581	12
	2.38475	90.4769	90.7522	92.2741	89.9507		93.5332	91.2112	93.1584	94.6912		96.3299	97.5222	96.1504	94.8495			2.38475	93.4083	0.730793	12
	2.4475	89.8341	89.9803	90.405	87.3767		93.4153	90.6545	94.3759	95.576		96.3072	98.5224	96.9383	94.3144			2.4475	93.1417	0.992896	12
	2.51027	89.9238	91.3728	91.4174	88.6714		92.3206	93.2018	94.7016	94.47		96.8056	96.772	94.462	94.0691			2.51027	93.1823	0.730831	12
	2.573	88.2942	90.616	90.3894	87.5154		93.55	91.2449	95.9534	93.1257		97.5532	98.7497	95.4525	94.6265			2.573	93.0893	1.02691	12
	2.63577	90.8208	90.4495	92.2586	88.3785		91.2934	90.1484	93.93	95.4399		97.2361	96.1128	91.9631	93.5786			2.63577	92.6341	0.770972	12
	2.69853	91.4785	90.2376	89.0343	86.6831		92.4554	90.9919	93.0727	93.5852		95.3557	97.1584	93.8766	92.9543			2.69853	92.2403	0.811562	12
	2.7613	89.7145	88.6333	89.4548	87.947		91.4955	90.9582	95.7819	95.627		96.4884	97.4767	93.6515	93.7347			2.7613	92.5803	0.95385	12
	2.82405	87.8756	91.1458	90.8411	87.7312		91.7986	91.2787	96.5364	93.2619		96.4431	97.7495	95.0698	93.2441			2.82405	92.748	0.941845	12
	2.88682	89.6846	87.1046	90.4517	87.3305		90.3671	89.9966	93.9129	95.0825		96.8509	97.0902	95.4075	92.1739			2.88682	92.1211	1.00859	12
	2.94957	88.3391	90.7976	90.9813	88.7793		91.1923	92.915	95.0789	94.0956		95.6502	97.1357	95.4075	93.4894			2.94957	92.8218	0.812047	12
	3.01233	89.5351	89.4809	90.5452	88.8101		92.3543	91.0425	95.2503	93.8064		95.7182	95.9764	94.6871	92.5084			3.01233	92.4762	0.748623	12
	3.0751	88.7726	89.1781	90.919	87.9316		91.0408	91.1606	92.8669	92.0878		94.4495	97.4085	94.4845	92.9097			3.0751	91.9341	0.781818	12
	3.13785	87.9803	89.6171	89.19	87.6233		91.4618	90.1822	94.6159	94.7933		94.8346	95.4762	94.4845	95.4292			3.13785	92.1407	0.891633	12
	3.20062	90.6414	90.4647	89.5794	86.6369		92.4217	90.6039	93.0213	94.1637		96.7377	95.4308	96.1279	91.1929			3.20062	92.2518	0.860858	12
	3.26338	89.8191	89.6019	90.3583	88.2398		92.068	91.5317	94.6845	92.0708		96.8962	97.2948	95.3174	92.7759			3.26338	92.5549	0.846999	12
	3.32613	88.952	89.6322	88.4735	89.0105		93.7689	89.7605	93.69	92.2069		96.0127	96.2491	93.1337	92.8874			3.32613	91.9815	0.795533	12
	3.38888	88.9221	88.8906	89.6729	87.4538		91.1923	90.6714	94.7359	92.9896		95.8541	97.8177	95.7902	92.8874			3.38888	92.2398	0.950559	12
	3.45165	89.565	88.3457	90.2492	87.8083		93.7184	90.4352	93.5185	92.6153		95.4916	96.4083	95.5651	92.3969			3.45165	92.1765	0.835405	12
	3.5144	88.0849	90.1771	90.5919	86.1282		91.7817	92.0378	93.2785	92.7174		96.2166	94.9079	94.6871	93.4225			3.5144	92.0026	0.838419	12
	3.57717	87.9055	88.5727	91.0125	88.8564		91.4112	90.0978	94.273	94.9804		94.3815	96.09	95.8802	94.0245			3.57717	92.2905	0.861311	12
	3.63993	88.8175	89.6473	89.4704	88.7947		92.1859	90.4352	94.7188	92.9045		94.5854	96.4083	94.7321	91.4158			3.63993	92.0097	0.763521	12
	3.70268	89.8939	88.5425	88.8629	86.7139		91.5123	89.9798	94.2387	94.4359		95.4916	96.7038	93.8541	93.8016			3.70268	92.0026	0.914692	12
	3.76545	86.7693	87.9068	88.5514	85.3113		92.1186	90.587	95.8848	94.7592		96.1713	94.9079	95.6551	91.0814			3.76545	91.642	1.11458	12
	3.8282	88.8324	88.0278	89.8442	85.6813		91.3102	91.498	93.227	92.0708		95.469	95.7945	94.5295	93.0212			3.8282	91.6088	0.89044	12
	3.89097	87.2029	90.616	88.4268	87.5		90.165	90.0978	95.7305	93.2449		94.9932	95.9991	95.4975	91.728			3.89097	91.7668	0.941481	12
	3.95373	88.2643	87.3316	89.1121	86.0358		90.485	89.2375	94.4959	94.1126		94.2003	93.794	93.0212	91.4827			3.95373	90.9644	0.856266	12
	4.01648	89.2211	89.4354	89.595	88.7176		91.6975	89.2038	94.1015	92.0027		96.1486	96.431	94.3719	93.6009			4.01648	92.0439	0.817397	12
	4.07925	87.8756	87.0592	90.296	86.6831		90.2324	87.6856	93.8443	93.1428		95.7182	94.5442	94.7771	93.3333			4.07925	91.266	0.962809	12
	4.142	87.472	87.0289	88.0685	86.2361		92.3543	89.3219	93.3813	93.6873		93.6339	96.9993	95.7001	94.2029			4.142	91.5072	1.0633	12
	4.20477	87.158	86.817	89.0966	84.6023		90.9229	89.7436	94.4444	93.9085		94.5854	94.3169	94.8447	92.8874			4.20477	91.1106	1.0327	12
	4.26753	87.756	86.0451	90.3894	85.897		90.2661	89.0857	93.4328	94.521		94.4042	95.6354	92.2783	92.0401			4.26753	90.9793	0.952637	12
	4.33028	86.7843	88.7089	89.8754	85.9125		89.3062	90.0472	93.0213	93.9085		94.087	94.5215	91.7154	92.7313			4.33028	90.885	0.83381	12
	4.39303	87.1879	88.2246	88.5047	85.373		91.8996	89.2375	94.393	93.1938		94.8799	94.7715	95.2724	92.7982			4.39303	91.3114	0.992271	12
	4.45582	88.8922	86.7867	88.5202	86.9605		89.6093	90.1991	94.1872	92.4111		96.2166	95.1125	95.0698	91.5942			4.45582	91.2966	0.950964	12
	4.51857	87.457	85.9392	88.7072	86.6677		92.6406	90.1991	95.4904	92.2239		93.9964	95.3626	92.0306	91.4604			4.51857	91.0146	0.939324	12
	4.58132	87.5766	87.1349	89.6106	85.2959		91.125	89.7605	94.2044	92.1048		93.2488	94.9989	94.1018	92.0401			4.58132	90.9335	0.895545	12
	4.64408	87.457	85.2429	88.3178	86.4519		90.5861	90.8401	92.9698	93.4661		95.8768	96.431	91.5353	91.0145			4.64408	90.8491	1.01886	12
	4.70683	88.07	87.3619	91.3396	86.082		90.8892	87.8711	93.1413	92.7004		94.7667	95.749	92.2332	91.5942			4.70683	90.9832	0.879105	12
	4.7696	85.678	87.8916	88.5047	86.7139		90.6197	89.9123	94.7359	91.186		94.5401	96.2719	93.8991	91.505			4.7696	90.9549	0.980349	12
	4.83237	86.8441	89.8592	88.3489	86.2053		88.902	88.7652	92.6783	93.4661		95.5369	94.2714	92.4358	92.4415			4.83237	90.8129	0.878576	12
	4.89512	85.5434	88.3154	88.3489	85.8662		91.2934	88.2085	92.2154	92.6493		94.6987	95.749	93.1337	91.5273			4.89512	90.6291	0.960803	12
	4.95788	88.5783	85.9694	86.1838	86.267		90.2492	87.4157	93.2956	93.3469		95.333	93.3849	95.0698	92.1516			4.95788	90.6038	1.03509	12
	6.92383	12.7224	7.88558	7.42991	9.58693		19.4678	15.722	20.3704	18.9893		18.2148	16.1628	13.7326	12.6421			6.92383	14.4105	1.29782	12
	6.9865	12.7074	7.58287	7.13396	8.56967		19.2826	15.7389	20.7133	18.4448		18.4413	15.6854	13.3724	12.0624			6.9865	14.1446	1.35316	12
	7.04925	12.3038	7.91585	6.91589	7.90691		18.5921	15.1991	20.2332	18.1385		18.7358	15.9582	13.8676	12.5084			7.04925	14.0229	1.33203	12
	7.11202	12.3636	7.65854	6.65109	7.49075		18.8447	14.7436	20.6619	17.9003		18.5319	15.9582	13.2598	11.7503			7.11202	13.8179	1.38299	12
	7.17478	12.3038	7.40124	6.43302	7.01295		18.1037	14.8954	20.1818	17.4749		18.7358	15.9582	13.6425	11.4381			7.17478	13.6318	1.38103	12
	7.23753	12.3038	7.47692	6.10592	6.4889		18.3395	14.6255	20.6447	17.2537		18.5093	16.2537	13.3724	11.5273			7.23753	13.5751	1.42456	12
	7.3003	12.1692	7.58287	5.95016	6.35018		19.0805	13.8833	20.8162	17.0835		18.8944	16.4128	12.9446	11.4158			7.3003	13.5486	1.46879	12
	7.36305	12.1094	7.44665	5.95016	6.11899		18.9458	14.4568	20.6962	16.505		18.396	15.8218	13.2823	11.1706			7.36305	13.4083	1.44646	12
	7.42582	12.1692	7.67368	5.95016	5.81073		18.9626	14.2713	20.6619	16.9644		18.7132	16.1855	13.2373	11.0368			7.42582	13.4697	1.47218	12
	7.48857	12.0197	7.47692	5.8567	5.68742		18.5248	13.8158	20.5418	16.6582		18.2148	16.1173	13.1022	10.8584			7.48857	13.2395	1.45184	12
	7.55133	12.1244	7.58287	5.66978	5.57953		18.6595	13.529	20.3875	16.9644		18.464	16.1173	12.8095	10.5686			7.55133	13.2047	1.47332	12
RAW DATA		Mn2+ (uM)					Mn2+ (uM)					Mn2+ (uM)
		400					400					400
		7324	7679	7449	7558		6458	6498	6533	6464		4429	4322	4359	4383
		7548	7502	7568	7765		6568	6321	6535	6299		4376	4404	4286	4418
		7579	7391	7326	7437		6468	6433	6235	6375		4383	4369	4348	4296
		7513	7487	7290	7488		6458	6441	6476	6432		4311	4317	4326	4297
		7442	7287	7284	7428		6519	6288	6320	6246		4363	4400	4257	4392
		7343	7426	7235	7423		6400	6383	6156	6311		4418	4329	4270	4434
		7147	7350	7228	7501		6318	6534	6393	6214		4415	4354	4380	4433
		7352	7233	7243	7173		6355	6387	6247	6047		4272	4332	4281	4324
		7226	7178	7179	7159		6317	6339	6145	6107		4250	4294	4277	4301
		7245	7118	6929	7053		6307	6328	6257	6179		4427	4272	4330	4379
		7186	7057	7121	7239		6330	6255	6355	6163		4339	4340	4204	4292
		7091	7144	7058	7180		6193	6409	6142	6035		4399	4325	4251	4287
		7027	7049	6812	7035		6358	6198	6061	6058		4338	4325	4320	4349
		6945	6952	6862	7073		6160	6300	6019	5928		4284	4345	4197	4347
		7012	6939	6688	7070		6170	6193	6097	6001		4341	4293	4191	4341
		6991	6757	6629	6805		6046	6233	6172	5990		4343	4228	4255	4321
		6761	6811	6663	6933		6079	6269	5981	5828		4271	4263	4280	4281
		6858	6862	6595	6834		6112	6222	6022	5944		4260	4267	4243	4289
		6803	6692	6638	6757		6050	6143	5931	5836		4351	4312	4198	4310
		6783	6595	6456	6819		5959	6098	5748	5760		4332	4301	4357	4350
		6603	6582	6478	6664		6050	6110	5868	5743		4406	4229	4287	4304
		6774	6559	6442	6635		5889	6009	5812	5793		4364	4304	4246	4367
		6456	6524	6458	6629		5759	6079	5898	5778		4322	4323	4279	4277
		6662	6464	6383	6571		5873	6015	5888	5772		4279	4327	4279	4342
		6634	6445	6437	6649		5845	5994	5824	5763		4281	4326	4290	4310
		6478	6367	6312	6530		5810	5853	5754	5570		4317	4306	4205	4360
		6244	6420	6336	6418		5724	5979	5655	5599		4267	4319	4204	4366
		6386	6344	6152	6420		5765	5859	5720	5522		4261	4348	4223	4307
		6230	6348	6368	6365		5712	5783	5597	5521		4296	4246	4238	4346
		6262	6373	6120	6405		5720	5685	5683	5520		4371	4379	4236	4332
		6320	6321	6298	6286		5648	5658	5563	5431		4383	4295	4276	4184
		6323	6261	6362	6426		5475	5591	5538	5529		4331	4264	4208	4310
		6194	6246	6121	6277		5615	5554	5494	5413		4296	4313	4263	4153
		6314	6106	6015	6235		5436	5651	5489	5534		4338	4389	4296	4275
		6308	6212	5987	6176		5484	5520	5375	5360		4322	4339	4308	4327
		6110	6088	6014	6192		5418	5397	5296	5472		4332	4152	4213	4327
		6114	6054	5970	5987		5444	5543	5375	5193		4367	4308	4235	4283
		6099	6085	6134	6109		5599	5379	5375	5376		4299	4291	4276	4247
		6121	5951	6136	5992		5386	5292	5517	5299		4391	4250	4240	4237
		5983	6048	5988	5969		5527	5420	5249	5276		4317	4242	4268	4331
		5999	5982	5947	5976		5439	5405	5309	5436		4385	4236	4332	4330
		5906	6002	5954	6113		5348	5462	5269	5198		4327	4254	4227	4251
		5916	5954	5793	5889		5488	5408	5433	5406		4341	4318	4292	4275
		5962	5981	5828	5897		5345	5379	5283	5199		4318	4235	4293	4274
		5869	5809	5722	5978		5360	5454	5233	5182		4302	4306	4278	4281
		5846	5885	5837	5988		5286	5421	5287	5185		4303	4252	4257	4283
		5803	5980	5851	5890		5341	5509	5217	5208		4319	4273	4259	4350
		5796	5949	5866	5844		5246	5369	5314	5248		4372	4289	4311	4287
		5744	5818	5786	5921		5238	5392	5351	5241		4350	4202	4260	4301
		5470	5399	5553	5624		6120	6072	5993	6065		5033	5109	5015	5201
		5285	5316	5449	5533		6180	5920	5940	5803		5171	5100	5011	5190
		5293	5292	5524	5565		6146	5928	5837	5759		5173	5063	4962	5101
		5263	5295	5428	5529		5981	5785	5666	5824		5108	5145	5073	5100
		5214	5260	5432	5482		6075	6005	5813	5796		5100	5001	5079	5095
		5305	5186	5514	5517		6153	5957	5814	5866		5087	5146	5062	5096
		5282	5255	5452	5444		5902	6014	5927	5873		5145	5073	5028	5089
		5293	5346	5272	5400		6173	5890	5771	5834		5183	5039	4925	5166
		5309	5304	5368	5482		6086	5897	5906	5804		5105	5185	5018	5139
		5360	5316	5427	5489		6069	5706	5779	5724		5183	5133	5006	5184
		5274	5327	5418	5401		6039	5980	5743	5639		5161	5092	4959	5124
		5281	5269	5438	5472		6047	5986	6050	5780		5137	5073	5044	5114
		5213	5306	5405	5422		6032	5912	5807	5823		5043	5078	5067	5246
		5322	5233	5352	5397		5913	5745	5701	5662		5076	5121	5087	5199
		5251	5324	5399	5466		6008	5818	5673	5631		5116	5075	4958	5171
		5144	5233	5319	5422		6006	5882	5788	5669		5052	5106	4966	5109
		5237	5169	5363	5391		5928	5839	5818	5601		5153	5047	4985	5215
		5220	5247	5287	5417		6001	5740	5860	5568		5116	4993	4995	5194
		5297	5199	5283	5245		5920	5777	5590	5702		5040	5009	4864	5104
		5181	5332	5383	5374		5911	5696	5653	5636		5080	5014	4945	5062
		6689	6607	6420	6488		5938	5928	5832	5877		4414	4399	4442	4485
		6604	6603	6454	6507		5860	5768	5870	5724		4577	4403	4454	4517
		6635	6367	6142	6247		5669	5760	5663	5854		4445	4327	4423	4486
		6485	6404	6386	6306		5806	5701	5729	5650		4335	4392	4361	4431
		6487	6467	6102	6361		5795	5711	5668	5771		4470	4430	4375	4410
		6502	6431	6141	6337		5976	5757	5762	5557		4362	4350	4373	4467
		6571	6370	6269	6035		5822	5741	5626	5674		4358	4358	4388	4471
		6445	6371	6223	6297		5765	5689	5670	5486		4398	4412	4359	4400
		6199	6516	6238	6148		5769	5735	5719	5735		4309	4391	4342	4416
		6338	6318	6213	6253		5627	5548	5762	5631		4349	4362	4351	4430
		6265	6244	6175	5932		5782	5727	5624	5670		4344	4406	4323	4487
		6327	6263	6121	6076		5793	5545	5483	5559		4393	4444	4310	4409
		6277	6306	6103	6100		5665	5626	5642	5568		4368	4334	4247	4352
		6280	6220	6131	5964		5660	5662	5572	5418		4315	4367	4287	4331
		6193	6302	5980	6065		5728	5617	5485	5531		4482	4332	4373	4430
		6120	6276	6096	5916		5754	5539	5512	5571		4385	4400	4354	4431
		6113	6194	5930	6023		5699	5518	5410	5470		4288	4417	4295	4413
		6220	6131	5920	5979		5666	5684	5593	5450		4298	4248	4320	4393
		6262	6108	6021	5865		5704	5547	5386	5448		4370	4318	4295	4402
		6060	6130	5866	5979		5716	5540	5533	5599		4287	4366	4321	4320
		6042	6058	6024	5832		5602	5723	5401	5459		4272	4313	4279	4271
		6150	6176	6015	5915		5693	5512	5502	5438		4255	4306	4322	4348
		5976	5996	5952	5757		5607	5520	5469	5574		4328	4311	4279	4312
		6136	6188	5905	5936		5673	5566	5338	5652		4253	4317	4199	4305
		5944	6015	5830	5908		5446	5536	5569	5577		4197	4339	4225	4345
		6058	6102	5955	5862		5648	5475	5508	5462		4296	4262	4258	4313
		6072	6034	5959	5675		5701	5641	5530	5450		4261	4358	4323	4265
		6059	6039	5972	5818		5481	5487	5467	5486		4328	4311	4249	4333
		6167	6011	5888	5638		5680	5575	5540	5443		4235	4258	4234	4222
		5945	5976	5906	5814		5530	5636	5326	5518		4265	4357	4265	4265
		5985	6017	5930	5799		5543	5442	5435	5455		4356	4327	4311	4357
		6169	6007	5799	5869		5651	5498	5535	5429		4345	4344	4258	4220
		5940	6014	5734	5851		5559	5507	5522	5584		4243	4225	4301	4261
		5969	6086	5714	5875		5629	5517	5507	5473		4323	4295	4297	4339
		6019	5979	5854	5834		5549	5518	5541	5542		4346	4341	4292	4264
		6042	6058	5813	5754		5531	5412	5530	5518		4314	4290	4199	4326
		6075	6016	5732	5724		5512	5514	5488	5418		4269	4330	4284	4275
		5926	5939	5760	5686		5596	5392	5549	5610		4338	4271	4256	4266
		6052	5996	5924	5836		5554	5407	5433	5565		4252	4290	4271	4254
		6009	5945	5804	5669		5547	5374	5504	5617		4251	4334	4306	4230
		6015	6037	5869	5753		5482	5525	5523	5552		4273	4257	4196	4219
		5906	5987	5803	5678		5555	5409	5596	5473		4306	4344	4240	4244
		6075	5976	5923	5734		5421	5344	5478	5609		4292	4228	4085	4197
		6119	5962	5716	5624		5490	5394	5428	5500		4209	4274	4170	4169
		6001	5856	5743	5706		5433	5392	5586	5620		4259	4288	4160	4204
		5878	6022	5832	5692		5451	5411	5630	5481		4257	4300	4223	4182
		5999	5755	5807	5666		5366	5335	5477	5588		4275	4271	4238	4134
		5909	5999	5841	5760		5415	5508	5545	5530		4222	4273	4238	4193
		5989	5912	5813	5762		5484	5397	5555	5513		4225	4222	4206	4149
		5938	5892	5837	5705		5406	5404	5416	5412		4169	4285	4197	4167
		5885	5921	5726	5685		5431	5346	5518	5571		4186	4200	4197	4280
		6063	5977	5751	5621		5488	5371	5425	5534		4270	4198	4270	4090
		6008	5920	5801	5725		5467	5426	5522	5411		4277	4280	4234	4161
		5950	5922	5680	5775		5568	5321	5464	5419		4238	4234	4137	4166
		5948	5873	5757	5674		5415	5375	5525	5465		4231	4303	4255	4166
		5991	5837	5794	5697		5565	5361	5454	5443		4215	4241	4245	4144
		5892	5958	5816	5588		5450	5456	5440	5449		4247	4175	4206	4190
		5880	5852	5843	5765		5428	5341	5498	5582		4166	4227	4259	4217
		5941	5923	5744	5761		5474	5361	5524	5460		4175	4241	4208	4100
		6013	5850	5705	5626		5434	5334	5496	5550		4215	4254	4169	4207
		5804	5808	5685	5535		5470	5370	5592	5569		4245	4175	4249	4085
		5942	5816	5768	5559		5422	5424	5437	5411		4214	4214	4199	4172
		5833	5987	5677	5677		5354	5341	5583	5480		4193	4223	4242	4114
		5904	5770	5721	5582		5373	5290	5511	5531		4158	4126	4132	4103
		5968	5909	5752	5756		5445	5288	5488	5407		4244	4242	4192	4198
		5878	5752	5797	5624		5358	5198	5473	5474		4225	4159	4210	4186
		5851	5750	5654	5595		5484	5295	5446	5506		4133	4267	4251	4225
		5830	5736	5720	5489		5399	5320	5508	5519		4175	4149	4213	4166
		5870	5685	5803	5573		5360	5281	5449	5555		4167	4207	4099	4128
		5805	5861	5770	5574		5303	5338	5425	5519		4153	4158	4074	4159
		5832	5829	5682	5539		5457	5290	5505	5477		4188	4169	4232	4162
		5946	5734	5683	5642		5321	5347	5493	5431		4247	4184	4223	4108
		5850	5678	5695	5623		5501	5347	5569	5420		4149	4195	4088	4102
		5858	5757	5753	5534		5411	5321	5494	5413		4116	4179	4180	4128
		5850	5632	5670	5609		5379	5385	5422	5493		4232	4242	4066	4082
		5891	5772	5864	5585		5397	5209	5432	5448		4183	4212	4097	4108
		5731	5807	5682	5626		5381	5330	5525	5359		4173	4235	4171	4104
		5809	5937	5672	5593		5279	5262	5405	5493		4217	4147	4106	4146
		5722	5835	5672	5571		5421	5229	5378	5445		4180	4212	4137	4105
		5925	5680	5533	5597		5359	5182	5441	5486		4208	4108	4223	4133
		851	521	477	622		1156	932	1188	1116		804	711	610	567
		850	501	458	556		1145	933	1208	1084		814	690	594	541
		823	523	444	513		1104	901	1180	1066		827	702	616	561
		827	506	427	486		1119	874	1205	1052		818	702	589	527
		823	489	413	455		1075	883	1177	1027		827	702	606	513
		823	494	392	421		1089	867	1204	1014		817	715	594	517
		814	501	382	412		1133	823	1214	1004		834	722	575	512
		810	492	382	397		1125	857	1207	970		812	696	590	501
		814	507	382	377		1126	846	1205	997		826	712	588	495
		804	494	376	369		1100	819	1198	979		804	709	582	487
		811	501	364	362		1108	802	1189	997		815	709	569	474

## Sheet: Ca
Empty Liposomes
POPE:POPG
Ca2+
NORMALIZED DATA		Fluorescence Fura2 (380 nm)														Fluorescence Fura2 (340 nm)															Normalized Fura2 (340/380)																Neg 2 mM Ca2+
	Time (min)	2 mM Ca2+														2 mM Ca2+															2 mM Ca2+															Time (min)	Mean	SEM	N
	-11.9823	116.297	131.769	129.438	113.533	137.46	140.653	115.354	118.585	115.844	121.182	116.715	112.163	112.245		113.405	125.589	131.088	109.875	98.6784	119.5	123.379	123.132	117.819	107.246	139.787	108.892	123.281			97.5135	95.3105	101.275	96.7776	71.787	84.9608	106.957	103.834	101.704	88.5001	119.767	97.0837	109.832			-11.9823	98.1003	3.31044	13
	-11.6141	120.058	123.799	134.62	106.903	131.59	120.946	114.444	130	119.734	128.867	118.27	114.162	110.204		113.713	123.906	127.461	113.95	112.922	117	115.017	119.395	105.837	107.101	123.268	104.524	102.656			94.7155	100.086	94.6824	106.592	85.8135	96.7374	100.5	91.8423	88.3933	83.1101	104.226	91.5581	93.151			-11.6141	94.7237	1.91564	13
	-11.246	115.14	133.515	131.533	103.815	127.321	123.311	114.04	120.283	123.435	118.128	115.16	113.727	115.121		102.619	120.875	122.107	110.815	110.279	117.167	121.843	126.69	119.201	105.217	120.426	111.232	107.656			89.1259	90.533	92.8341	106.743	86.6148	95.0174	106.842	105.327	96.5704	89.0706	104.573	97.8064	93.5161			-11.246	96.5056	2.00017	13
	-10.8779	121.89	130.677	131.312	103.088	121.025	118.131	119.495	123.396	114.421	122.66	110.593	114.162	114.007		110.786	107.407	121.244	117.868	101.322	121.333	127.133	134.342	106.912	107.826	120.782	114.509	115.312			90.89	82.1931	92.3324	114.337	83.7199	102.711	106.392	108.87	93.4376	87.9064	109.213	100.304	101.145			-10.8779	97.9578	2.86194	13
	-10.5097	115.236	131.332	127.784	104.178	127.001	119.257	126.768	116.698	127.135	127.488	120.117	107.124	121.614		106.317	117.172	117.271	105.799	100.734	111.333	119.283	118.149	105.684	97.8261	125.222	98.908	113.594			92.2604	89.218	91.773	101.556	79.3176	93.356	94.096	101.244	83.1272	76.7338	104.25	92.3301	93.4051			-10.5097	91.7437	2.28539	13
	-10.1416	115.622	125.655	128.776	99.0917	120.491	125.338	109.798	128.962	119.924	118.227	117.396	114.248	119.388		106.78	116.33	122.625	102.508	96.7695	116.833	116.382	125.801	107.066	92.3188	136.412	102.964	110.938			92.3524	92.5788	95.2235	103.447	80.3126	93.2147	105.997	97.5485	89.2782	78.0864	116.199	90.123	92.922			-10.1416	94.4064	2.79918	13
	-9.7736	111.186	124.672	127.784	104.632	119.53	117.23	101.919	118.679	111.29	128.079	119.048	113.988	121.336		98.7673	126.431	110.708	112.539	107.93	129.5	118.089	119.217	105.837	96.3768	121.314	99.376	115.781			88.8306	101.41	86.637	107.557	90.2946	110.467	115.865	100.453	95.1001	75.248	101.904	87.1812	95.4222			-9.7736	96.6439	3.098	13
	-9.40523	111.765	112.555	119.074	100.908	118.25	116.779	115.253	120.943	121.157	122.66	124.684	109.036	117.161		95.6857	113.973	125.216	106.426	97.0631	112.167	129.01	120.285	104.301	102.029	131.794	95.1638	105.938			85.6135	101.26	105.158	105.468	82.0832	96.0501	111.937	99.4554	86.0872	83.1803	105.702	87.2777	90.4201			-9.40523	95.361	2.80491	13
	-9.03707	106.268	126.638	120.066	96.6394	123.693	133.784	110.101	125.66	118.975	122.365	119.048	107.559	121.521		113.713	113.131	108.808	119.279	106.167	124.5	115.188	114.591	104.762	93.7681	123.979	110.452	112.031			107.006	89.3347	90.6236	123.427	85.8316	93.0606	104.62	91.1908	88.0535	76.6301	104.142	102.69	92.1906			-9.03707	96.0616	3.32051	13
	-8.66893	112.44	127.511	123.374	106.812	121.025	119.257	111.717	113.962	111.101	121.675	117.104	106.95	124.212		100.924	118.519	114.335	111.285	102.496	106.5	113.481	114.057	100.614	100.435	120.071	102.808	101.719			89.7588	92.9477	92.6737	104.188	84.6905	89.3031	101.579	100.083	90.5616	82.5436	102.534	96.1268	81.8916			-8.66893	92.9909	2.0903	13
	-8.30087	105.979	114.52	118.633	103.815	116.649	134.459	109.697	114.151	121.822	126.601	118.95	105.734	111.781		108.166	112.29	117.271	106.426	104.993	103.833	115.358	121.53	100.307	105.652	121.847	105.46	109.219			102.064	98.0527	98.8522	102.516	90.0074	77.2228	105.161	106.465	82.3394	83.4529	102.435	99.7409	97.7077			-8.30087	95.8474	2.62576	13
	-7.9327	106.268	122.271	132.415	99.3642	119.957	122.072	109.091	112.642	103.605	116.65	113.994	108.341	114.378		103.544	114.646	110.535	111.442	99.4126	123	113.993	113.345	94.47	94.9275	115.808	103.12	96.25			97.4365	93.7644	83.4768	112.155	82.8733	100.76	104.494	100.625	91.1826	81.3779	101.591	95.1814	84.1504			-7.9327	94.5437	2.64958	13
	-7.56458	105.979	119.214	122.492	100.999	119.317	125.45	112.424	113.774	116.793	122.069	114.772	98.523	111.132		106.009	115.488	111.399	108.777	101.762	103.333	114.676	115.836	105.991	102.319	115.808	104.992	107.656			100.029	96.8747	90.9441	107.701	85.2872	82.3698	102.003	101.813	90.7508	83.8205	100.903	106.566	96.8727			-7.56458	95.8412	2.35048	13
	-7.19642	99.6143	114.192	115.656	96.3669	124.12	117.905	107.071	118.491	115.75	113.202	120.505	98.0886	115.306		101.079	104.377	119.516	102.978	100.147	114.833	114.334	121.886	94.9309	97.2464	114.742	97.0359	111.563			101.47	91.4048	103.338	106.86	80.6858	97.3945	106.784	102.866	82.0141	85.9052	95.2177	98.9267	96.7533			-7.19642	96.1246	2.44135	13
	-6.8283	92.0926	115.066	116.979	94.4596	114.941	117.005	107.172	114.717	111.29	117.537	106.9	103.128	118.367		95.8398	111.448	122.28	104.075	102.349	107.167	112.969	113.345	97.235	91.3043	111.19	101.404	92.6562			104.069	96.856	104.531	110.18	89.045	91.5919	105.41	98.8042	87.3706	77.6814	104.013	98.3286	78.2786			-6.8283	95.8584	2.88381	13
	-6.46015	100.482	119.432	114.333	98.1835	113.981	110.586	110.909	117.642	115.465	118.227	112.342	105.995	120.779		104.006	100.673	111.572	103.762	97.9442	101.167	122.867	122.242	95.6989	94.9275	121.492	101.872	106.562			103.507	84.2933	97.5849	105.681	85.9304	91.4827	110.782	103.911	82.8814	80.2929	108.145	96.1105	88.2292			-6.46015	95.2947	2.90088	13
	-6.092	103.086	117.249	118.743	98.2743	108.965	120.833	107.879	119.906	107.211	122.167	104.276	99.8262	108.349		103.852	115.152	111.226	98.4326	101.322	107.333	116.894	116.904	92.3195	100.87	111.545	94.3838	92.1875			100.743	98.2112	93.6696	100.161	92.9856	88.8276	108.357	97.4966	86.1104	82.5666	106.971	94.5481	85.084			-6.092	95.0563	2.22733	13
	-5.72383	100.386	119.76	112.018	93.0064	116.542	127.703	104.343	108.868	104.459	118.03	104.276	94.2659	115.584		94.9153	111.448	124.18	102.821	96.3289	108.833	107.167	106.584	90.4762	103.478	113.499	102.496	98.5938			94.5505	93.0594	110.857	110.553	82.6559	85.224	102.706	97.9018	86.6139	87.6715	108.845	108.731	85.3002			-5.72383	96.513	2.97602	13
	-5.35563	105.4	117.031	117.2	93.4605	110.459	114.865	103.838	104.811	107.59	116.65	111.759	99.6525	108.998		105.701	120.37	109.154	97.8056	94.2731	105.5	115.7	100.534	102.458	97.2464	115.986	97.3479	98.75			100.285	102.854	93.1349	104.649	85.3468	91.8471	111.423	95.9188	95.2297	83.3658	103.782	97.6874	90.5979			-5.35563	96.6247	2.21403	13
	-4.02062	94.5034	97.5983	101.654	84.9228	105.55	104.279	107.172	106.321	101.518	112.02	114.189	92.9626	105.844		101.541	97.3064	124.18	105.016	92.0705	103.5	105.461	109.431	91.2442	88.5507	104.796	89.3916	102.031			107.447	99.701	122.159	123.66	87.2296	99.2527	98.4035	102.925	89.8798	79.0492	91.7743	96.1586	96.3976			-4.02062	99.5414	3.50379	13
	-3.6946	91.514	103.93	98.677	89.2825	96.2647	106.869	115.556	103.774	102.751	107.882	106.803	95.9166	98.0519		97.6888	103.535	110.19	97.6489	97.9442	99.1667	101.877	103.025	96.3134	87.2464	110.302	94.5398	94.8438			106.747	99.6202	111.667	109.371	101.745	92.7924	88.1629	99.2786	93.7343	80.8722	103.276	98.5646	96.7281			-3.6946	98.6584	2.3622	13
	-3.3262	100.193	100.109	106.395	89.01	113.767	103.716	95.0505	103.302	105.977	108.177	102.624	93.8315	98.0519		93.5285	98.1481	107.772	85.2665	99.5595	108.167	106.485	111.21	108.756	92.4638	104.263	95.4758	90.7812			93.3485	98.0411	101.295	95.7943	87.5115	104.291	112.03	107.655	102.622	85.4742	101.597	101.752	92.5849			-3.3262	98.7689	2.1242	13
	-2.95815	93.8284	104.694	111.025	84.7411	99.3597	104.054	95.5556	96.5094	97.723	103.547	106.997	93.2233	106.679		93.9908	85.8586	102.418	92.6332	90.0147	102.833	105.973	101.779	89.2473	82.8986	111.368	89.3916	84.6875			100.173	82.0088	92.2474	109.313	90.5948	98.8268	110.902	105.461	91.3269	80.059	104.085	95.8898	79.3853			-2.95815	95.4055	2.95917	13
	-2.58972	85.6316	105.895	105.402	84.1054	101.921	106.532	100.303	93.3962	98.3871	108.276	107.386	89.1399	98.1447		92.9122	90.5724	113.817	93.1034	98.6784	108.5	109.556	106.406	87.5576	91.3043	111.545	92.8237	87.3438			108.502	85.5302	107.983	110.699	96.8185	101.848	109.225	113.929	88.993	84.3257	103.873	104.133	88.9949			-2.58972	100.373	2.85408	13
	-2.22158	100.193	103.493	110.364	87.4659	96.2647	98.6486	95.9596	105.094	95.5408	105.616	101.846	91.225	103.896		97.8428	101.347	95.8549	86.5204	87.0778	102.167	100.683	91.9929	98.0031	93.1884	100.178	93.1357	97.6562			97.6545	97.9258	86.8536	98.9189	90.4567	103.566	104.922	87.5336	102.577	88.2334	98.3614	102.094	93.9941			-2.22158	96.3917	1.76542	13
	-1.85347	98.65	101.856	105.843	89.01	101.281	104.955	92.1212	99.8113	96.9639	101.675	99.2225	85.2302	103.432		94.453	90.7407	101.036	83.6991	91.9236	98.5	98.1229	99.4662	97.235	91.0145	108.881	89.5476	95.625			95.7456	89.0874	95.4582	94.0333	90.7613	93.8498	106.515	99.6542	100.28	89.5152	109.734	105.066	92.4518			-1.85347	97.0885	1.85424	13
	-1.48543	88.2353	99.2358	103.638	87.0118	98.9328	105.18	92.1212	99.434	99.6205	101.576	103.013	88.6186	90.8163		96.6102	96.2963	97.7547	92.0063	93.8326	91.6667	103.754	97.153	103.226	84.2029	95.9147	93.6037	91.875			109.492	97.0379	94.3229	105.74	94.8448	87.152	112.628	97.7061	103.619	82.8962	93.1097	105.625	101.166			-1.48543	98.8722	2.38854	13
	0	100	100	100	100	100	100	100	100	100	100	100	100	100		100	100	100	100	100	100	100	100	100	100	100	100	100			100	100	100	100	100	100	100	100	100	100	100	100	100			0	100	0	13
	0.326	89.1032	99.2358	101.874	112.897	100.213	102.59	92.3232	97.2642	98.5769	100.69	99.5141	93.1364	96.846		88.7519	99.6633	103.282	94.6708	97.6505	103	103.072	95.0178	95.2381	110.435	107.815	103.12	95.9375			99.6058	100.431	101.381	83.8557	97.4425	100.4	111.642	97.6905	96.613	109.678	108.342	110.719	99.0619			0.326	101.297	2.08644	13
	0.694183	90.5497	104.803	91.4002	147.866	97.2252	102.815	94.8485	101.321	98.1025	96.4532	104.47	83.927	89.1466		90.4468	99.4949	107.427	87.931	92.6579	102	107.338	102.313	86.0215	128.116	102.131	98.5959	97.5			99.8864	94.9348	117.534	59.4669	95.3023	99.207	113.168	100.979	87.6854	132.827	97.7612	117.478	109.37			0.694183	101.969	4.90307	13
	1.06238	88.1389	92.5764	98.1257	140.418	99.2529	100	95.7576	95.3774	97.4383	99.6059	106.317	86.5334	91.4657		91.5254	105.724	103.8	83.0721	88.8399	96.8333	103.584	100.534	92.0123	111.884	96.6252	102.184	94.6875			103.842	114.202	105.782	59.1607	89.5086	96.8333	108.173	105.406	94.4313	112.327	90.8842	118.086	103.522			1.06238	100.166	4.19025	13
	1.43062	90.6461	102.293	99.3385	121.253	96.905	94.9324	92.1212	97.1698	96.6793	93.6946	90.1846	97.3067	94.7124		88.1356	98.1481	115.544	89.185	95.8884	101.667	94.5392	112.278	88.7865	112.174	100.888	109.516	89.2188			97.2304	95.9485	116.313	73.5525	98.9509	107.094	102.625	115.548	91.8361	119.723	111.868	112.548	94.1996			1.43062	102.88	3.55318	13
	1.7988	100.193	95.1965	92.3925	118.892	97.6521	96.2838	96.2626	93.6792	93.7381	96.6502	97.2789	93.0495	88.8683		94.453	107.071	97.4093	94.3574	92.2173	106.167	100	107.473	89.7081	97.2464	105.861	92.8237	95.3125			94.2712	112.473	105.43	79.364	94.4346	110.264	103.882	114.725	95.7008	100.617	108.823	99.7573	107.251			1.7988	102.076	2.66175	13
	2.16698	92.0926	98.2533	99.6692	112.171	98.1857	100.788	90.9091	88.7736	92.2201	103.054	95.724	83.5795	92.9499		88.5978	105.219	96.8912	102.351	90.7489	99.1667	95.3925	101.068	88.9401	90.5797	89.8757	99.688	94.5312			96.2052	107.089	97.2127	91.2458	92.4258	98.3911	104.932	113.849	96.4433	87.8952	93.8904	119.273	101.701			2.16698	100.043	2.52673	13
	2.53513	90.1639	99.345	90.1874	104.723	97.5454	92.2297	94.9495	94.1509	94.7818	102.463	95.3353	88.3579	98.6085		95.5316	96.1279	93.0915	93.5737	96.1821	109.333	106.655	96.7972	77.1121	93.3333	108.881	98.2839	86.25			105.953	96.7618	103.22	89.3535	98.6024	118.545	112.328	102.811	81.3575	91.0897	114.209	111.234	87.4671			2.53513	100.995	3.17705	13
	2.90348	97.107	92.3581	103.638	100.454	103.415	101.351	97.0707	94.2453	91.8406	90.7389	92.7114	88.5317	100.464		91.6795	92.0875	106.39	99.373	91.63	99.6667	93.3447	104.448	94.6237	87.8261	99.2895	94.2278	92.0312			94.4108	99.7071	102.655	98.9238	88.604	98.3378	96.1616	110.826	103.03	96.7899	107.095	106.434	91.6064			2.90348	99.5832	1.76055	13
	3.27168	94.0212	92.4672	97.7949	104.541	96.4781	98.6486	87.7778	87.7358	96.4896	89.8522	90.9621	85.1434	94.2486		93.8367	98.3165	105.181	97.3354	94.2731	101.833	96.9283	93.7722	89.4009	94.3478	95.3819	100.78	87.0312			99.8037	106.326	107.553	93.1071	97.7145	103.228	110.425	106.88	92.6535	105.003	104.859	118.365	92.3422			3.27168	102.943	2.12162	13
	3.63985	94.3105	95.4148	95.2591	110.082	98.3991	94.3694	90.303	91.4151	92.5996	91.133	92.6142	85.3171	95.0835		90.6009	101.01	94.6459	96.2382	93.3921	100.167	101.706	94.8399	82.3349	100	98.4014	95.4758	92.9688			96.0666	105.864	99.3563	87.4243	94.9115	106.143	112.628	103.746	88.9149	109.73	106.249	111.907	97.7759			3.63985	101.594	2.28689	13
	4.00793	90.4532	88.6463	94.0463	103.542	90.6083	89.8649	93.7374	94.3396	96.8691	93.202	88.1438	83.927	93.5065		85.5162	101.01	101.554	92.0063	88.3994	92.5	97.4403	93.2384	87.5576	88.9855	102.131	109.828	90.9375			94.5419	113.947	107.983	88.8587	97.5621	102.932	103.95	98.8327	90.3876	95.476	115.869	130.862	97.2526			4.00793	102.958	3.25678	13
	4.37633	95.3713	95.524	87.1003	105.45	91.889	96.2838	84.9495	91.3208	85.1044	91.9212	108.746	84.6221	92.7644		88.2897	92.7609	103.109	90.2821	94.2731	97.1667	104.266	107.651	87.404	106.812	110.835	100	94.5312			92.5747	97.1075	118.379	85.6164	102.595	100.917	122.739	117.883	102.702	116.199	101.92	118.172	101.905			4.37633	106.055	3.18583	13
	4.7445	88.4282	96.8341	88.4234	108.356	89.2209	100.113	95.6566	101.792	90.7021	98.6207	92.6142	78.5404	81.6327		89.8305	94.6128	97.582	88.4013	95.7416	90.3333	106.143	107.651	88.172	101.884	106.394	103.432	103.281			101.586	97.7061	110.358	81.5841	107.308	90.2317	110.963	105.756	97.2106	103.309	114.879	131.693	126.52			4.7445	106.085	3.77479	13
	5.11263	94.8891	93.9956	91.29	108.81	102.561	98.0856	91.7172	89.2453	94.3074	95.0739	93.1001	78.5404	86.3636		87.2111	96.8013	99.4819	89.4984	94.1263	92.6667	103.242	96.4413	83.7174	98.2609	101.954	87.5195	103.906			91.9084	102.985	108.973	82.2519	91.7756	94.4753	112.566	108.063	88.7707	103.352	109.51	111.432	120.312			5.11263	102.029	3.10968	13
	5.48077	93.2498	95.1965	98.8975	116.712	95.0907	94.7072	85.2525	82.3585	85.2941	94.3842	92.9057	85.8384	84.3228		83.0508	98.6532	88.9465	96.7085	86.4905	93.8333	108.532	99.4662	96.3134	98.2609	105.151	98.908	95.3125			89.0628	103.631	89.9381	82.8607	90.9557	99.0773	127.307	120.772	112.919	104.107	113.18	115.226	113.033			5.48077	104.775	3.79813	13
	5.8489	90.2604	98.7991	102.977	123.342	95.4109	92.5676	90.5051	90.6604	89.0892	93.9901	89.6987	82.1894	81.1688		84.8998	94.2761	89.4646	91.6928	88.2526	95	108.874	94.6619	91.0906	96.9565	107.993	92.6677	92.0312			94.061	95.422	86.8784	74.34	92.4974	102.628	120.296	104.414	102.247	103.156	120.395	112.749	113.383			5.8489	101.728	3.68226	13
	6.2173	87.3674	92.5764	94.0463	114.169	92.1025	88.4009	83.7374	94.2453	88.1404	95.665	94.3635	85.404	78.5714		89.6764	96.2963	108.808	89.3417	85.1689	94.1667	102.56	105.338	87.404	97.971	105.506	83.3073	91.25			102.643	104.018	115.697	78.2539	92.4719	106.522	122.478	111.77	99.1645	102.41	111.808	97.545	116.136			6.2173	104.686	3.21484	13
	6.58543	90.839	96.2882	83.7927	116.44	104.376	86.036	87.5758	83.7736	91.9355	83.9409	88.7269	83.4926	88.8683		91.0632	90.0673	92.7461	91.8495	91.3363	97.3333	106.997	106.762	86.1751	99.7101	100	95.7878	87.9688			100.247	93.5393	110.685	78.8817	87.5072	113.131	122.176	127.441	93.7343	118.786	112.705	114.726	98.9878			6.58543	105.581	4.03656	13
	6.95368	92.6712	93.559	96.8026	119.437	97.9723	90.7658	95.4545	89.3396	91.8406	87.2906	99.5141	83.8401	86.1781		83.5131	87.2054	91.8826	83.0721	83.7004	95.1667	97.6109	97.5089	78.1874	106.087	99.8224	91.2637	92.1875			90.1177	93.209	94.9174	69.5531	85.4328	104.849	102.259	109.144	85.1338	121.533	100.31	108.854	106.973			6.95368	97.8682	3.73288	13
	7.32168	89.5853	95.1965	89.4157	119.528	107.257	92.6802	88.2828	88.2075	83.3966	89.1626	94.4606	82.1025	79.3135		85.208	91.7508	96.8912	89.4984	102.203	86.1667	94.0273	107.295	86.7896	102.174	98.9343	90.7956	104.219			95.1138	96.3805	108.36	74.8767	95.2874	92.9721	106.507	121.64	104.068	114.593	104.736	110.588	131.401			7.32168	104.348	3.94235	13
	7.6899	84.7637	89.5197	99.559	122.162	100.213	93.4685	91.6162	89.6226	89.7533	89.064	86.8805	73.6751	81.9109		92.1418	90.5724	97.4093	90.1254	87.9589	95.3333	98.8055	104.27	85.8679	110.435	106.927	99.064	84.0625			108.704	101.176	97.8408	73.7755	87.7715	101.995	107.847	116.344	95.671	123.995	123.074	134.461	102.627			7.6899	105.791	4.4844	13
	8.05838	96.0463	90.6114	94.3771	117.348	97.9723	92.9054	89.3939	92.5472	90.4175	87.8818	90.9621	78.1929	77.0872		89.3683	91.0774	92.4007	82.1317	86.0499	94.8333	101.365	97.153	88.6329	99.2754	100.71	92.8237	100.312			93.0471	100.514	97.9059	69.9899	87.8309	102.075	113.392	104.977	98.0263	112.965	110.717	118.711	130.129			8.05838	103.098	4.18327	13
	8.42662	96.2392	84.2795	87.6516	122.071	89.6478	85.3604	92.2222	84.0566	87.3814	85.6158	92.0311	74.0226	81.2616		82.8968	94.1077	94.6459	82.9154	87.0778	82.3333	98.8055	102.313	91.5515	103.913	109.059	94.5398	92.1875			86.1362	111.662	107.98	67.924	97.1332	96.4538	107.138	121.719	104.772	121.371	118.502	127.717	113.445			8.42662	106.304	4.54213	13
	8.79485	85.3423	94.4323	93.9361	122.797	92.1025	91.8919	89.0909	88.4906	89.3738	86.4039	87.5607	79.2354	78.5714		73.1895	92.0875	91.3644	86.2069	86.0499	94.6667	104.266	102.847	76.9585	104.348	103.197	97.0359	93.4375			85.7599	97.517	97.2624	70.2025	93.4285	103.02	117.034	116.224	86.1086	120.767	117.858	122.465	118.92			8.79485	103.582	4.63336	13
	9.16307	80.0386	91.7031	93.9361	124.796	97.4386	88.1757	87.0707	85.9434	81.6888	83.9409	91.6424	80.7124	86.2709		83.8213	83.165	94.6459	88.0878	83.4068	88	91.1263	96.9751	83.871	107.971	91.6519	86.4275	93.2812			104.726	90.6894	100.756	70.5856	85.5993	99.8008	104.658	112.836	102.671	128.627	100.01	107.081	108.126			9.16307	101.244	3.83256	13
	9.53123	87.0781	95.9607	94.0463	117.62	87.5133	89.4144	80.9091	79.8113	80.3605	82.9557	90.8649	71.9374	80.705		83.2049	86.3636	88.601	76.3323	82.6725	90.3333	105.802	94.8399	89.8618	106.667	98.579	87.3635	83.9062			95.5521	89.999	94.21	64.8972	94.4685	101.028	130.767	118.83	111.823	128.583	108.49	121.444	103.967			9.53123	104.927	5.00455	13
	9.89938	85.4388	90.393	94.2668	112.352	86.5528	83.6712	79.596	78.2075	85.6736	85.7143	87.2692	76.1077	79.2208		78.7365	87.8788	86.8739	76.489	85.7562	88.8333	101.877	83.9858	81.7204	103.768	98.0462	91.4197	82.5			92.1555	97.2186	92.1575	68.0796	99.0797	106.17	127.993	107.388	95.3858	121.063	112.349	120.119	104.139			9.89938	103.331	4.32784	13
	10.2675	86.5959	82.5328	89.3054	124.705	86.6596	79.6171	84.1414	96.4151	86.2429	85.5172	93.3916	74.3701	80.334		80.2773	82.6599	92.4007	79.6238	86.4905	90.1667	101.195	96.4413	88.3257	103.913	98.579	88.7676	83.75			92.7034	100.154	103.466	63.8498	99.8049	113.25	120.267	100.027	102.415	121.511	105.554	119.359	104.252			10.2675	103.586	4.1476	13
	10.6355	91.2247	86.6812	95.7001	127.339	97.1185	87.7252	86.2626	83.6792	78.7476	86.4039	96.9874	72.0243	75.974		78.5824	93.0976	92.9188	82.2884	84.2878	94	95.3925	92.8826	79.7235	104.638	107.638	86.8955	88.9062			86.1416	107.402	97.0937	64.6216	86.7887	107.153	110.584	110.998	101.239	121.103	110.981	120.647	117.022			10.6355	103.213	4.46846	13
	11.0039	89.1032	88.3188	88.5336	113.261	92.9562	82.4324	90.404	84.717	75.9013	81.8719	89.2128	75.7602	82.1892		87.057	91.5825	92.9188	85.8934	91.4831	88.6667	100	83.8078	84.9462	109.855	96.4476	96.5679	91.5625			97.7036	103.695	104.953	75.8369	98.4152	107.563	110.615	98.9268	111.917	134.179	108.11	127.465	111.404			11.0039	106.983	3.94453	13
	11.372	87.1745	85.3712	84.785	129.7	90.8218	82.9955	83.1313	86.9811	83.0171	86.3054	83.5763	78.2798	80.9833		82.7427	81.6498	94.9914	83.8558	85.4626	84.5	109.556	95.1957	88.4793	105.942	99.8224	94.5398	99.0625			94.9161	95.641	112.038	64.6535	94.0992	101.813	131.787	109.444	106.58	122.752	119.439	120.772	122.325			11.372	107.405	4.89163	13
	11.7402	83.8959	80.5677	95.2591	134.242	92.7428	91.6667	75.7576	84.3396	86.7173	80.2956	90.7677	67.7672	81.2616		85.208	94.1077	91.3644	87.931	79.5888	85.8333	96.4164	107.651	88.9401	107.536	93.2504	78.9392	82.3438			101.564	116.806	95.9115	65.5021	85.8167	93.6364	127.27	127.64	102.563	133.925	102.735	116.486	101.332			11.7402	105.476	5.24386	13
	12.1083	79.0743	91.7031	88.2029	125.341	94.6638	86.8243	82.0202	85.7547	89.0892	81.2808	85.2284	73.4144	78.9425		88.1356	89.899	83.9378	82.2884	81.7915	94.6667	94.5392	104.093	77.8802	107.971	97.1581	87.2075	87.6562			111.459	98.0327	95.1645	65.6518	86.4021	109.032	115.263	121.384	87.4182	132.837	113.997	118.788	111.038			12.1083	105.113	4.97595	13
	12.4764	82.8351	94.214	85.1158	122.162	91.2487	81.4189	83.3333	83.9623	82.7324	78.1281	86.6861	75.4127	73.9332		82.4345	95.1178	92.7461	81.9749	86.6373	91.1667	97.2696	100.89	82.3349	103.768	94.6714	95.1638	85.9375			99.5164	100.959	108.965	67.1036	94.9464	111.972	116.724	120.161	99.5194	132.818	109.212	126.191	116.237			12.4764	108.025	4.59459	13
	12.8446	82.0636	98.4716	82.3594	127.702	93.3831	82.4324	78.4848	74.6226	83.3966	83.8424	88.241	76.4553	76.9017		84.1294	85.1852	94.1278	70.8464	94.42	87	106.143	96.7972	83.7174	114.928	92.0071	95.3198	80.1562			102.517	86.5073	114.289	55.4779	101.11	105.541	135.241	129.716	100.385	137.076	104.268	124.674	104.232			12.8446	107.772	6.07966	13
	13.2131	80.0386	82.9694	91.8412	123.07	84.952	86.1486	87.3737	83.3962	86.8121	83.4483	86.7833	75.8471	77.18		78.2743	89.7306	93.6097	79.9373	89.5742	87.5	110.068	100.356	80.9524	106.087	96.4476	87.5195	95.9375			97.7957	108.149	101.926	64.9527	105.441	101.569	125.974	120.336	93.2501	127.129	111.136	115.389	124.304			13.2131	107.489	4.68741	13
	13.5812	83.2208	88.7555	83.903	125.25	93.7033	86.036	79.596	77.7358	75.4269	78.3251	79.3003	73.7619	78.3859		76.1171	93.0976	92.5734	81.9749	80.3231	80.8333	98.6348	90.3915	83.4101	96.087	99.4671	89.5476	92.3438			91.464	104.892	110.334	65.4492	85.7206	93.9529	123.919	116.28	110.584	122.677	125.431	121.401	117.807			13.5812	106.916	5.00078	13
	13.9495	78.5921	90.8297	89.4157	119.346	88.794	84.1216	81.0101	82.5472	89.4687	82.8571	84.3537	73.8488	77.4583		92.1418	87.2054	88.4283	85.5799	80.1762	85.1667	96.587	95.5516	77.1121	109.13	109.236	89.2356	92.5			117.24	96.0098	98.8958	71.7074	90.2946	101.242	119.228	115.754	86.189	131.709	129.498	120.835	119.419			13.9495	107.54	5.04273	13
	14.3177	86.4031	90.0655	79.6031	117.984	86.873	86.2613	75.1515	79.8113	67.1727	89.4581	85.2284	76.5421	65.1206		80.5855	91.2458	84.6287	86.5204	79.442	79.5	98.1229	101.779	74.1935	109.71	100	95.3198	84.0625			93.2669	101.31	106.313	73.3325	91.4461	92.1619	130.567	127.525	110.452	122.639	117.332	124.532	129.087			14.3177	109.228	4.99206	13
	14.6858	83.3173	84.9345	86.4388	115.259	90.5016	76.9144	79.798	79.717	80.5503	78.6207	80.8552	71.7637	73.8404		77.812	85.3535	88.2556	77.5862	90.8957	81.3333	101.365	93.9502	78.8018	95.942	102.842	91.4197	87.9688			93.3924	100.493	102.102	67.3147	100.436	105.745	127.027	117.855	97.8294	122.032	127.193	127.39	119.134			14.6859	108.303	4.83622	13
	15.054	80.9065	85.4803	87.2106	116.894	86.6596	88.2883	78.0808	85.7547	80.4554	73.7931	78.62	70.7211	76.2523		80.2773	85.0168	93.2642	83.8558	92.8047	87.3333	94.7099	100.356	88.3257	98.8406	98.0462	85.8034	83.125			99.2224	99.4578	106.941	71.7368	107.091	98.9184	121.297	117.027	109.782	133.943	124.709	121.326	109.013			15.054	109.267	4.3271	13
	15.4222	77.5313	86.2445	83.462	114.805	87.2999	80.4054	78.0808	84.8113	78.463	77.734	88.0466	65.0738	73.9332		80.8937	94.2761	88.0829	73.1975	83.5536	82	96.9283	93.4164	84.639	106.667	98.2238	92.8237	82.1875			104.337	109.313	105.537	63.7583	95.7087	101.983	124.138	110.146	107.871	137.22	111.559	142.644	111.165			15.4222	109.645	5.35437	13
	15.7904	69.6239	81.2227	79.2723	118.71	92.3159	85.3604	72.1212	78.3962	79.6964	79.803	80.1749	70.9818	69.666		76.7334	94.7811	77.7202	76.8025	87.3715	85.3333	101.365	102.135	88.7865	98.2609	100.355	89.8596	80.3125			110.211	116.693	98.042	64.6974	94.6441	99.9683	140.548	130.281	111.406	123.129	125.17	126.595	115.282			15.7904	112.051	5.41496	13
	16.1586	73.5776	85.1528	81.3671	124.069	90.0747	83.2207	74.2424	82.6415	79.3169	76.7488	79.3975	71.5899	74.9536		78.8906	90.2357	90.8463	83.0721	80.6167	81	96.7577	87.0107	81.4132	92.7536	95.7371	88.6115	97.9688			107.221	105.969	111.65	66.9564	89.4999	97.3315	130.327	105.287	102.643	120.854	120.58	123.777	130.706			16.1586	108.677	4.91935	13
	16.5266	73.8669	84.7162	83.462	120.254	86.2327	77.8153	86.0606	81.1321	87.4763	77.0443	83.4791	68.636	81.0761		77.6579	90.0673	88.4283	86.8339	96.4758	85.5	93.0034	94.1281	79.5699	101.159	93.4281	89.8596	79.2188			105.132	106.317	105.95	72.2085	111.878	109.876	108.067	116.018	90.9617	131.3	111.918	130.922	97.7092			16.5266	107.558	4.27912	13
	16.8951	79.6528	87.8821	87.8721	118.529	78.2284	76.464	73.4343	80.3774	83.2068	72.8079	76.1905	66.7246	72.9128		83.8213	91.5825	83.0743	78.0564	81.0573	77.8333	89.5904	92.7046	86.1751	94.2029	91.4742	90.3276	85.3125			105.233	104.211	94.54	65.8545	103.616	101.791	122.001	115.337	103.567	129.386	120.06	135.374	117.006			16.8951	109.075	4.88646	13
	17.263	79.6528	76.7467	87.8721	110.99	81.1099	78.1532	68.9899	82.2642	75.4269	81.8719	81.2439	75.2389	69.1095		72.8814	92.5926	91.8826	72.7273	82.9662	78	84.471	99.4662	76.4977	86.8116	102.487	96.0998	79.5312			91.4987	120.647	104.564	65.526	102.289	99.804	122.44	120.911	101.42	106.033	126.147	127.726	115.08			17.263	108.007	4.76284	13
	17.6312	87.1745	81.3319	79.8236	103.542	86.2327	72.5225	68.9899	79.717	78.5579	75.3695	77.4538	68.5491	68.3673		86.4407	92.7609	91.5371	81.6614	82.8194	84.3333	91.4676	90.5694	81.874	96.5217	92.54	90.0156	89.5312			99.1582	114.052	114.674	78.8678	96.0418	116.286	132.581	113.614	104.221	128.065	119.478	131.316	130.956			17.6312	113.793	4.41324	13
	17.9993	75.6027	87.3362	87.8721	110.899	93.7033	84.5721	71.6162	85.8491	81.5939	75.0739	76.7736	70.5474	73.8404		86.5948	94.9495	82.2107	76.9592	83.9941	76.1667	84.8123	93.9502	73.7327	98.5507	88.6323	95.3198	83.9062			114.539	108.717	93.5572	69.3957	89.6384	90.0613	118.426	109.436	90.3654	131.272	115.446	135.115	113.632			17.9993	106.123	5.15218	13
	18.3676	82.6422	86.6812	85.226	108.81	83.1377	79.5045	70.303	80.6604	87.7609	82.6601	82.7017	69.5917	76.9944		86.2866	87.2054	82.038	87.3041	88.3994	85.8333	94.8805	96.0854	71.8894	97.3913	95.7371	78.0031	77.9688			104.41	100.605	96.2593	80.2352	106.329	107.96	134.959	119.123	81.9151	117.821	115.762	112.087	101.265			18.3676	106.056	4.1446	13
	18.7356	79.46	85.8079	82.3594	116.985	79.8292	77.7027	67.8788	75.6604	79.5066	78.9163	81.1467	67.2459	72.449		86.1325	93.6027	86.0104	79.3103	80.3231	85.5	85.1536	85.0534	82.0276	109.855	92.54	84.5554	81.5625			108.397	109.084	104.433	67.7956	100.619	110.035	125.449	112.415	103.171	139.205	114.04	125.741	112.579			18.7356	110.228	4.61169	13
	19.104	78.785	80.4585	76.4057	122.797	78.8687	74.3243	70.101	79.5283	75.6167	72.7094	78.8144	72.6325	72.82		88.5978	87.7104	79.7927	80.8777	85.022	91.6667	88.0546	92.3488	76.6513	105.797	93.4281	92.1997	94.6875			112.455	109.013	104.433	65.8627	107.802	123.333	125.611	116.121	101.368	145.507	118.542	126.94	130.029			19.104	114.386	5.2478	13
	19.4724	74.0598	83.6245	79.3826	112.352	87.0864	82.2072	77.7778	76.0377	77.3245	81.5764	80.9524	73.1538	75.5102		80.7396	90.404	88.7737	82.7586	90.4552	86.6667	95.9044	99.8221	77.7266	101.449	87.9218	85.0234	79.6875			109.019	108.107	111.83	73.6599	103.868	105.425	123.306	131.28	100.52	124.361	108.609	116.226	105.532			19.4724	109.365	3.89643	13
	19.8406	76.2777	80.5677	85.0055	108.174	80.683	81.1937	73.7374	73.4906	80.9298	77.2414	82.6045	69.1573	78.1076		76.4253	79.6296	81.8653	74.9216	90.1615	83	92.1502	88.968	69.5853	99.4203	85.2575	85.9594	84.2188			100.193	98.8357	96.3059	69.26	111.748	102.225	124.971	121.06	85.9822	128.714	103.212	124.296	107.824			19.8406	105.74	4.68524	13
	20.2088	73.5776	86.5721	79.7133	107.811	81.5368	74.2117	66.8687	83.9623	83.4915	76.7488	84.9368	70.5474	72.5417		76.2712	89.5623	89.4646	82.9154	86.1968	89.3333	84.471	93.0605	70.9677	97.8261	93.6057	83.9314	83.4375			103.661	103.454	112.233	76.908	105.715	120.376	126.324	110.836	85	127.463	110.206	118.972	115.02			20.2088	108.936	4.08033	13
	20.577	76.9527	84.1703	74.7519	110.627	86.873	75.1126	69.4949	79.3396	74.9526	74.0887	84.1594	67.3328	79.8701		81.2018	85.0168	84.1105	79.7806	81.0573	82.3333	92.6621	89.3238	76.1905	100.87	96.27	85.0234	79.2188			105.522	101.006	112.52	72.1169	93.3055	109.613	133.336	112.584	101.652	136.147	114.39	126.273	99.1845			20.577	109.05	4.74697	13
	20.9452	86.0174	82.8603	81.3671	96.0945	80.5763	71.2838	73.2323	78.0189	79.3169	70.8374	80.8552	68.1147	68.6456		85.6703	88.3838	81.1744	75.7053	96.4758	77.6667	104.949	95.1957	80.1843	83.0435	89.5204	84.5554	82.3438			99.5965	106.666	99.7632	78.7822	119.732	108.954	143.309	122.016	101.094	117.231	110.717	124.137	119.955			20.9452	111.689	4.34299	13
	21.3134	77.8206	81.3319	87.5413	98.5468	78.762	79.5045	76.5657	68.8679	78.9374	70.7389	76.0933	64.6394	65.2134		79.661	83.165	80.4836	77.5862	94.8605	81	91.6382	90.9253	77.1121	86.5217	92.54	83.7754	79.0625			102.365	102.254	91.9378	78.7303	120.439	101.881	119.686	132.028	97.6877	122.311	121.614	129.604	121.237			21.3134	110.906	4.46802	13
	21.6816	81.4851	75.655	78.8313	88.7375	87.1932	75.7883	74.8485	84.1509	77.3245	76.2562	84.8397	66.6377	64.8423		79.661	82.4916	94.4732	88.0878	86.0499	85.8333	95.0512	87.0107	78.6482	93.0435	90.9414	77.0671	80.3125			97.7615	109.036	119.842	99.2678	98.6888	113.254	126.991	103.398	101.712	122.014	107.192	115.651	123.858			21.6816	110.667	2.85629	13
	22.0496	79.1707	79.8035	78.28	90.3724	76.5208	77.027	68.3838	80.6604	79.8861	78.2266	76.0933	71.5899	72.82		80.8937	83.165	83.9378	85.7367	82.232	71.6667	85.8362	95.0178	75.4224	87.2464	95.5595	88.2995	78.2812			102.176	104.212	107.228	94.8704	107.464	93.0409	125.521	117.8	94.4124	111.53	125.582	123.341	107.5			22.0496	108.821	3.18386	13
	22.418	81.6779	80.8952	76.1852	84.0145	87.0864	80.6306	68.1818	80.7547	82.6376	70.936	83.7707	73.9357	72.6345		77.1957	90.2357	93.437	78.2132	83.1131	77.6667	102.56	95.3737	73.1183	82.3188	93.0728	83.1513	82.0312			94.5123	111.546	122.644	93.0948	95.4374	96.324	150.421	118.103	88.4807	116.047	111.104	112.464	112.937			22.418	109.47	4.59825	13
	22.786	80.9065	78.4934	75.9647	87.9201	83.8847	79.8423	76.3636	83.6792	74.4782	70.936	87.2692	68.4622	71.6141		75.1926	87.8788	86.5285	84.953	92.0705	75.5	94.0273	89.6797	82.4885	90.4348	84.5471	85.9594	78.5938			92.9377	111.957	113.906	96.6252	109.758	94.5614	123.131	107.171	110.755	127.488	96.8808	125.558	109.746			22.786	109.267	3.22407	13
	23.1544	73.7705	88.1004	73.9802	95.0045	91.2487	77.3649	68.8889	73.5849	74.0987	75.468	78.5228	66.5508	78.3859		84.7458	89.2256	79.2746	74.9216	90.7489	80.6667	89.9317	89.8577	77.1121	82.029	101.776	83.6193	86.875			114.878	101.277	107.157	78.8611	99.4523	104.268	130.546	122.114	104.067	108.694	129.614	125.647	110.83			23.1544	110.57	3.96581	13
	23.5225	79.9421	92.1397	81.0364	93.5513	81.857	73.3108	67.5758	81.1321	73.4345	70.7389	74.9271	66.6377	70.9647		80.1233	84.8485	85.8377	80.094	87.6652	71.6667	84.9829	92.5267	83.1029	91.0145	88.0995	85.8034	81.5625			100.227	92.0867	105.925	85.6151	107.096	97.7573	125.76	114.045	113.166	128.663	117.58	128.761	114.934			23.5224	110.124	3.79149	13
	23.8908	77.7242	85.262	79.8236	97.8202	84.4184	75.3378	72.3232	76.5094	83.4915	70.7389	80.1749	70.1998	69.2022		82.1263	79.798	86.1831	83.5423	82.5257	79.1667	91.4676	87.0107	83.4101	88.1159	89.3428	80.4992	74.2188			105.664	93.5915	107.967	85.404	97.758	105.082	126.471	113.725	99.9026	124.565	111.435	114.672	107.249			23.8909	107.191	3.20189	13
	24.2592	69.1418	81.8777	74.4212	90.6449	87.2999	79.3919	66.3636	78.6792	78.1784	72.8079	75.2187	66.5508	66.9759		77.1957	85.3535	87.2193	69.7492	83.4068	81.3333	90.1024	87.7224	78.0338	81.7391	83.3037	83.1513	76.5625			111.648	104.245	117.197	76.9478	95.5405	102.445	135.771	111.494	99.8151	112.267	110.749	124.944	114.314			24.2593	109.029	3.96434	13
	24.6273	68.5632	83.2969	87.6516	85.6494	79.2956	73.536	68.9899	73.8679	74.8577	78.4236	78.8144	61.9461	74.397		76.5794	79.2929	82.038	76.3323	85.022	86.1667	89.2491	95.5516	68.3564	85.6522	82.7709	84.0874	73.125			111.692	95.1931	93.5956	89.1218	107.222	117.176	129.366	129.355	91.3151	109.217	105.02	135.743	98.2902			24.6273	108.639	4.30132	13
	24.9956	70.7811	80.3493	78.1698	86.1035	81.0032	70.2703	66.5657	75.8491	75.9962	78.2266	78.3285	65.9427	69.9443		83.359	90.2357	87.2193	78.3699	82.0852	79.8333	92.1502	92.8826	78.1874	79.5652	90.9414	82.6833	88.5938			117.77	112.304	111.577	91.0182	101.336	113.609	138.435	122.457	102.883	101.711	116.103	125.387	126.663			24.9956	113.943	3.53485	13
	25.3638	73.3848	85.0437	84.2337	91.3715	78.3351	72.1847	62.2222	68.3962	78.8425	66.3054	73.6638	64.2919	66.8831		90.2928	85.1852	81.8653	77.8997	80.7636	76	84.8123	87.3665	78.0338	93.4783	75.6661	83.9314	78.4375			123.04	100.166	97.1882	85.256	103.1	105.285	136.305	127.736	98.9743	140.981	102.718	130.547	117.275			25.3638	112.967	4.81359	13
	25.732	76.7599	76.9651	72.6571	84.0145	81.0032	78.6036	69.899	77.2642	76.7552	74.3842	79.689	69.2441	67.6252		80.8937	88.3838	84.8014	81.0345	81.7915	71.5	83.959	87.7224	76.4977	83.0435	89.8757	84.7114	77.8125			105.385	114.836	116.714	96.4529	100.973	90.9628	120.115	113.536	99.6645	111.641	112.783	122.337	115.064			25.732	109.267	2.67961	13
	26.0999	70.6847	78.4934	76.1852	88.1926	82.6041	69.482	68.8889	71.3208	78.9374	70.6404	77.551	62.5543	70.872		73.3436	86.8687	90.5009	73.3542	79.7357	77.3333	89.5904	104.626	76.3441	90	95.3819	88.6115	84.2188			103.762	110.67	118.791	83.1751	96.5276	111.3	130.051	146.698	96.7147	127.406	122.992	141.655	118.832			26.0999	116.044	5.07737	13
	26.4683	66.731	85.3712	82.5799	110.082	80.683	67.9054	69.596	73.6792	76.3757	68.2759	71.9145	67.5065	68.1818		73.8059	84.5118	97.4093	68.3386	77.0925	77.5	91.4676	91.8149	79.4163	102.464	92.1847	89.5476	77.9688			110.602	98.9933	117.958	62.0798	95.5498	114.129	131.427	124.614	103.981	150.073	128.187	132.65	114.354			26.4683	114.2	6.02093	13
	26.8365	72.2276	81.3319	80.4851	101.09	81.7503	75.2252	73.1313	75.7547	78.0835	71.5271	72.6919	63.51	71.7996		79.5069	83.165	89.4646	68.4953	85.9031	78.5	98.6348	83.0961	73.2719	94.6377	89.1652	84.7114	76.4062			110.078	102.254	111.157	67.7568	105.08	104.353	134.874	109.691	93.8379	132.31	122.662	133.383	106.416			26.8364	110.296	5.06272	13
	27.2046	77.5313	78.0568	76.6262	100.908	89.6478	74.6622	64.7475	72.7358	79.8861	70.7389	68.1244	66.2902	66.7904		70.416	89.5623	85.6649	78.0564	79.8825	84.5	92.1502	84.5196	72.1966	90.1449	84.5471	81.2793	92.6562			90.8227	114.74	111.796	77.3538	89.1071	113.176	142.322	116.201	90.3744	127.433	124.107	122.611	138.727			27.2047	112.213	5.54568	13
	27.5728	72.5169	80.786	80.1544	77.6567	74.1729	74.4369	66.2626	70.8491	77.3245	76.5517	76.2877	65.9427	67.1614		85.8243	87.3737	82.3834	74.6082	91.4831	78.1667	86.1775	96.2633	73.7327	80	89.8757	82.2153	78.9062			118.351	108.155	102.781	96.0744	123.338	105.011	130.054	135.871	95.355	104.505	117.812	124.677	117.487			27.5728	113.805	3.56476	13
	27.941	71.5526	78.3843	81.0364	72.0254	82.2839	75.7883	65.9596	66.7925	75.4269	80.3941	77.7454	64.0313	66.2338		68.1048	89.3939	91.5371	71.9436	88.9868	70.1667	88.0546	94.1281	73.1183	74.9275	90.4085	80.9672	75.625			95.1815	114.046	112.958	99.8863	108.146	92.5825	133.498	140.926	96.9392	93.2003	116.288	126.45	114.179			27.941	111.098	4.33168	13
	28.3092	67.7917	79.476	75.634	74.2053	75.2401	77.7027	65.3535	71.3208	78.2732	71.8227	79.1059	65.2476	78.4787		75.5008	88.3838	85.1468	82.9154	95.301	77.1667	96.587	94.306	78.341	72.6087	91.6519	82.8393	79.0625			111.372	111.208	112.577	111.738	126.663	99.3101	147.792	132.228	100.087	101.094	115.86	126.961	100.744			28.3092	115.203	4.05146	13
	28.6774	64.3202	74.0175	75.4135	68.8465	84.2049	70.045	60.7071	77.8302	72.9602	75.2709	71.4286	61.8593	67.1614		79.1988	85.3535	87.5648	76.8025	86.3436	77.3333	80.0341	85.4093	73.8863	74.9275	83.8366	92.5117	82.1875			123.132	115.315	116.113	111.556	102.54	110.405	131.837	109.738	101.269	99.5438	117.371	149.552	122.373			28.6774	116.211	3.78003	13
	29.0455	72.6133	72.0524	77.398	85.2861	82.1772	70.3829	66.3636	74.3396	76.3757	76.8473	77.3567	62.9018	69.3878		76.1171	95.9596	81.3472	78.8401	81.7915	72.8333	88.2253	84.3416	69.4316	88.1159	91.2966	81.5913	79.5312			104.825	133.18	105.102	92.4419	99.5307	103.482	132.942	113.454	90.908	114.664	118.02	129.712	114.619			29.0455	111.76	3.928	13
	29.4137	69.6239	79.476	74.2007	87.6476	79.1889	69.482	66.9697	71.5094	72.6755	82.069	77.551	71.3293	69.9443		69.3374	83.3333	88.7737	76.0188	87.812	78.3333	88.7372	93.0605	70.6605	91.0145	85.2575	90.3276	77.6562			99.5885	104.853	119.64	86.7323	110.889	112.739	132.504	130.137	97.2274	110.9	109.937	126.635	111.026			29.4137	111.755	3.66123	13
	29.7819	64.8987	76.4192	81.8082	91.7348	79.0822	72.4099	68.8889	76.0377	78.1784	68.867	76.7736	63.3362	69.295		77.3498	88.8889	88.4283	74.9216	88.9868	75.8333	86.3481	90.7473	74.0399	90.7246	87.5666	88.4555	79.5312			119.185	116.317	108.092	81.672	112.524	104.728	125.344	119.345	94.7064	131.739	114.058	139.66	114.772			29.7819	114.011	4.16304	13
	30.1501	70.4918	78.7118	76.1852	98.0926	77.4813	73.4234	73.0303	68.3962	69.7343	64.6305	69.6793	61.5986	69.7588		75.1926	84.3434	84.2832	78.0564	82.5257	82.5	85.1536	90.5694	80.0307	95.7971	86.3233	76.4431	85.4688			106.669	107.155	110.629	79.5742	106.51	112.362	116.6	132.419	114.765	148.223	123.887	124.099	122.52			30.1501	115.801	4.46053	13
	30.5182	72.324	80.8952	81.9184	95.822	74.4931	66.7793	75.7576	71.2264	73.1499	70.1478	70.5539	61.2511	65.2134		75.5008	91.2458	87.5648	72.5705	88.6931	83.5	83.7884	94.8399	72.8111	94.058	84.7247	78.6271	82.5			104.392	112.795	106.893	75.7347	119.062	125.039	110.601	133.153	99.5368	134.085	120.085	128.369	126.508			30.5182	115.096	4.48021	13
	30.8866	74.3491	73.7991	77.0673	87.6476	73.6393	73.1982	72.5253	64.8113	78.1784	65.4187	78.0369	64.5526	62.7087		81.3559	81.8182	90.5009	77.8997	79.8825	74.6667	85.3242	91.4591	82.7957	85.3623	91.119	90.9516	79.375			109.424	110.866	117.431	88.8783	108.478	102.006	117.648	141.116	105.906	130.486	116.764	140.895	126.577			30.8866	116.652	4.18454	13
	31.2546	70.974	81.6594	76.4057	81.5622	86.3394	73.1982	74.0404	69.5283	66.0342	67.8818	79.9806	62.5543	69.295		79.9692	80.4714	88.2556	69.4357	82.8194	86	80.3754	83.274	79.1091	83.4783	96.27	84.3994	88.4375			112.674	98.5452	115.509	85.1322	95.9231	117.489	108.556	119.77	119.8	122.976	120.367	134.922	127.625			31.2546	113.791	3.80254	13
	31.6228	60.5593	85.0437	73.3186	73.1153	85.9125	74.2117	68.0808	71.9811	79.5066	71.9212	75.6074	66.8983	71.0575		80.1233	90.0673	81.0017	73.9812	97.21	73.1667	83.959	100.356	79.4163	76.2319	88.6323	76.2871	75.625			132.305	105.907	110.479	101.184	113.15	98.5918	123.323	139.42	99.8864	105.994	117.227	114.034	106.428			31.6228	112.918	3.45693	13
	31.9912	66.4417	68.559	82.6902	78.02	78.6553	74.0991	81.9192	73.5849	76.6603	72.2167	71.9145	60.0348	65.6772		70.8783	81.6498	82.7288	77.7429	80.3231	81	85.3242	87.1886	69.5853	82.1739	93.4281	82.3713	90.9375			106.677	119.094	100.047	99.6449	102.12	109.313	104.157	118.487	90.7709	113.788	129.916	137.206	138.461			31.9912	113.052	4.14373	13
	32.3594	66.6345	79.1485	77.839	77.1117	73.9594	70.8333	74.8485	68.2075	74.2884	70.5419	69.1934	64.987	67.6252		79.1988	77.4411	85.4922	73.0408	90.3084	80.6667	91.4676	85.2313	83.5637	85.7971	89.8757	71.1388	80.625			118.855	97.8428	109.832	94.7207	122.105	113.882	122.204	124.959	112.486	121.626	129.891	109.466	119.223			32.3594	115.161	2.85332	13
	32.7276	62.5844	75.655	80.7056	81.7439	76.2006	70.9459	71.2121	75.4717	75.9962	68.0788	74.1497	62.7281	68.9239		75.8089	89.899	90.6736	73.511	91.1894	78.3333	87.0307	94.8399	68.9708	88.6957	89.1652	82.8393	82.0312			121.131	118.828	112.351	89.9284	119.67	110.413	122.213	125.663	90.7556	130.284	120.25	132.061	119.017			32.7276	116.351	3.60631	13
	33.0958	69.9132	70.8515	75.634	71.5713	74.5998	72.6351	75.5556	71.6038	68.5009	78.6207	66.3751	63.0756	69.0167		76.8875	77.6094	82.9016	77.8997	82.9662	84.1667	91.1263	87.5445	79.7235	84.7826	87.5666	87.3635	91.25			109.976	109.538	109.609	108.842	111.215	115.876	120.608	122.262	116.383	107.838	131.927	138.506	132.214			33.0958	118.061	2.87355	13
	33.4641	67.0203	78.821	70.011	78.7466	75.8805	66.4414	76.5657	65.1887	66.129	72.7094	81.7298	61.7724	66.6048		75.3467	82.9966	92.5734	77.5862	92.9515	88.1667	87.5427	94.1281	87.7112	87.2464	93.4281	81.1232	84.375			112.424	105.298	132.227	98.5264	122.497	132.698	114.337	144.393	132.636	119.993	114.313	131.326	126.68			33.4641	122.104	3.56815	13
	33.8322	72.9026	81.7686	68.3572	92.0981	74.92	76.1261	73.7374	75.0943	72.3909	74.9754	76.8707	67.854	67.5325		74.8844	85.1852	83.0743	66.9279	83.1131	74.6667	87.7133	94.484	72.3502	90.7246	81.8828	89.5476	81.25			102.718	104.178	121.53	72.6702	110.936	98.0828	118.954	125.82	99.9438	121.006	106.52	131.971	120.312			33.8322	110.357	4.31788	13
	34.2004	68.6596	76.7467	73.2084	82.2888	70.8645	71.8468	64.8485	71.6981	74.5731	82.5616	69.7765	61.9461	68.1818		77.1957	76.2626	87.0466	78.5266	85.7562	79.8333	88.7372	88.79	77.2657	75.6522	80.2842	89.2356	83.4375			112.432	99.3692	118.903	95.4281	121.014	111.116	136.838	123.839	103.611	91.6312	115.059	144.053	122.375			34.2004	115.051	4.25904	13
	34.5685	70.5882	73.2533	71.2238	76.4759	77.2679	74.2117	73.8384	74.2453	71.1575	68.3744	71.3314	64.8132	64.9351		73.4977	79.9663	88.0829	80.2508	86.3436	73.5	87.7133	87.1886	75.7296	79.1304	86.1456	77.3791	84.8438			104.122	109.164	123.671	104.936	111.746	99.041	118.791	117.433	106.425	115.731	120.768	119.388	130.659			34.5685	113.99	2.49741	13
	34.9368	63.9344	73.9083	71.6648	75.2952	78.4418	59.7973	70.202	70	69.7343	71.0345	72.9835	61.4248	71.8924		77.3498	92.5926	80.6563	76.1755	91.3363	79.6667	82.9352	95.0178	74.5008	78.8406	80.9947	86.2715	81.875			120.983	125.28	112.547	101.169	116.438	133.228	118.138	135.74	106.835	110.989	110.977	140.45	113.885			34.9368	118.974	3.25785	13
	35.305	66.9238	78.9301	70.1213	72.752	78.8687	66.2162	64.5455	62.8302	69.3548	66.9951	74.5384	67.7672	66.141		72.8814	78.2828	91.019	74.2947	85.7562	86	79.3515	80.9609	71.275	74.058	84.0142	81.1232	83.75			108.902	99.1799	129.802	102.12	108.733	129.878	122.939	128.857	102.769	110.542	112.713	119.709	126.623			35.305	115.597	3.1168	13
	35.6732	60.0771	68.2314	69.2393	75.931	78.0149	73.1982	70.7071	69.8113	66.7932	73.8916	76.2877	65.8558	68.8312		83.8213	77.7778	88.0829	77.8997	82.0852	84.6667	77.8157	92.3488	70.8141	76.6667	79.5737	83.6193	86.5625			139.523	113.991	127.215	102.593	105.217	115.668	110.054	132.283	106.02	103.756	104.307	126.973	125.761			35.6732	116.412	3.47103	13
	36.0413	60.7522	74.1266	63.1753	75.931	80.683	71.2838	71.3131	67.4528	69.5446	64.0394	74.4412	64.0313	69.9443		75.5008	91.0774	93.9551	79.6238	91.0426	78	86.3481	85.5872	71.1214	72.6087	93.0728	80.6552	71.25			124.277	122.867	148.721	104.863	112.84	109.422	121.083	126.885	102.267	113.381	125.029	125.962	101.867			36.0414	118.42	3.5875	13
	36.4095	70.4918	75	71.6648	70.2089	72.0384	70.8333	64.9495	74.717	69.9241	72.9064	72.5948	63.0756	66.6976		83.9753	86.1953	83.247	68.3386	83.2599	81.5	76.2799	89.3238	78.9555	76.8116	95.3819	82.5273	87.1875			119.128	114.927	116.162	97.336	115.577	115.059	117.445	119.55	112.916	105.356	131.39	130.839	130.721			36.4095	117.416	2.70981	13
	36.7777	59.9807	74.5633	77.9493	66.8483	74.1729	73.0856	64.9495	70.7547	80.4554	67.9803	73.3722	66.7246	65.7699		77.812	80.1347	83.0743	72.2571	79.5888	78	81.058	77.5801	74.5008	76.087	80.4618	82.6833	82.8125			129.728	107.472	106.575	108.091	107.302	106.724	124.802	109.647	92.5988	111.925	109.663	123.917	125.912			36.7777	112.643	2.89885	13
	37.1459	69.4311	77.5109	74.5314	73.6603	77.588	67.7928	58.5859	75.6604	73.055	75.7635	67.1526	62.9887	67.4397		73.3436	77.4411	88.9465	75.7053	81.7915	74.6667	76.4505	90.0356	75.7296	81.8841	79.2185	80.9672	74.375			105.635	99.9099	119.341	102.776	105.418	110.14	130.493	119	103.661	108.078	117.968	128.542	110.284			37.1459	112.404	2.72505	13
	37.5141	67.1167	76.9651	78.0595	72.9337	70.4376	72.1847	67.4747	68.6792	73.5294	68.2759	69.7765	61.6855	66.6048		75.963	91.0774	81.0017	65.8307	83.9941	67.3333	82.2526	99.6441	78.0338	81.7391	93.7833	81.7473	79.375			113.181	118.336	103.769	90.2611	119.246	93.2793	121.901	145.086	106.126	119.719	134.405	132.523	119.173			37.5141	116.693	4.35596	13
	37.8821	70.6847	79.8035	67.0342	70.2997	76.7343	69.1441	65.6566	69.6226	68.5009	64.2365	72.7891	63.7706	61.41		77.5039	83.67	86.8739	78.2132	88.2526	66.8333	80.7167	85.0534	72.8111	70.7246	88.6323	79.7192	80.625			109.647	104.845	129.596	111.257	115.011	96.658	122.938	122.163	106.292	110.1	121.766	125.009	131.29			37.8821	115.89	2.89832	13
	38.2503	65.3809	77.5109	70.452	72.4796	73.9594	65.8784	59.798	70.7547	70.3985	70.1478	67.8328	67.5934	69.3878		78.1202	84.0067	80.1382	76.6458	89.8678	81.5	80.3754	87.0107	70.5069	79.5652	90.2309	84.0874	73.4375			119.485	108.381	113.749	105.748	121.51	123.713	134.412	122.975	100.154	113.425	133.019	124.402	105.836			38.2503	117.447	2.94383	13
	38.6187	64.2237	76.2009	67.9162	60.0363	78.762	66.7793	64.8485	67.1698	66.888	70.2463	68.9018	63.5969	64.1929		76.1171	89.7306	90.1554	67.2414	89.4273	83.6667	83.4471	85.2313	80.0307	75.5072	91.4742	86.5835	82.8125			118.519	117.755	132.745	112.001	113.541	125.288	128.68	126.889	119.649	107.489	132.76	136.144	129.006			38.6187	123.113	2.48247	13
	38.9869	66.5381	76.6376	69.57	69.0282	80.1494	67.3423	60.101	75.0943	71.0626	70.8374	72.8863	62.3805	64.6568		74.4222	74.0741	86.3558	76.9592	91.7768	80.1667	85.6655	90.3915	71.5822	71.3043	89.3428	83.6193	71.875			111.849	96.6551	124.128	111.49	114.507	119.043	142.536	120.371	100.731	100.659	122.578	134.047	111.164			38.9869	116.135	3.64553	13
	39.3549	66.0559	76.9651	68.247	66.9391	79.6158	64.6396	62.4242	62.3585	67.4573	70.936	67.5413	64.5526	62.616		73.6518	93.266	82.2107	76.8025	83.7004	71.6667	83.2765	88.0783	78.0338	75.7971	92.7176	81.4353	74.6875			111.499	121.18	120.461	114.735	105.13	110.871	133.404	141.245	115.679	106.853	137.275	126.153	119.279			39.3549	120.29	3.16664	13
	39.7234	70.974	69.4323	71.6648	72.0254	74.5998	65.0901	68.2828	71.6038	72.0114	66.798	75.7046	63.8575	61.6883		77.812	84.3434	83.7651	71.6301	72.2467	87.6667	81.57	89.1459	68.9708	74.3478	82.0604	88.6115	78.2812			109.635	121.476	116.885	99.4511	96.8457	134.685	119.459	124.499	95.7777	111.302	108.396	138.764	126.898			39.7234	115.698	3.81462	13
	40.0914	60.27	70.0873	73.3186	73.3878	69.7972	74.0991	66.4646	66.6981	76.0911	67.8818	75.3158	65.9427	58.4416		76.2712	76.2626	82.9016	80.4075	85.9031	71.5	76.1092	86.4769	70.1997	77.2464	84.1918	86.7395	73.4375			126.549	108.811	113.07	109.565	123.075	96.4924	114.511	129.654	92.2575	113.795	111.785	131.538	125.66			40.0914	115.136	3.34316	13
	40.4595	67.406	72.9258	70.8931	91.8256	69.6905	67.9054	62.3232	62.0755	71.9165	65.6158	68.8047	66.0295	71.243		76.2712	72.0539	77.2021	67.5549	87.812	76.6667	84.6416	79.1815	66.3594	83.3333	80.8171	82.9953	72.1875			113.152	98.8044	108.899	73.5686	126.003	112.902	135.811	127.557	92.2729	127.002	117.459	125.694	101.326			40.4595	112.342	4.81175	13
	40.8279	68.6596	78.1659	74.6417	97.1844	67.6628	69.7072	59.697	71.0377	61.575	64.9261	73.1778	59.861	62.616		73.3436	84.6801	83.247	74.9216	90.1615	75.6667	78.3276	76.6904	74.808	95.2174	88.8099	89.0796	71.4062			106.822	108.334	111.529	77.0923	133.251	108.549	131.209	107.957	121.491	146.655	121.362	148.811	114.038			40.8279	118.238	5.27439	13
	41.1958	67.2131	78.3843	71.3341	95.1862	75.8805	69.8198	60.7071	64.8113	70.019	66.4039	71.2342	59.6872	63.8219		73.6518	77.7778	86.7012	74.1379	84.141	79.5	90.6143	77.5801	75.2688	87.2464	87.0337	92.8237	87.3438			109.579	99.2262	121.542	77.8873	110.886	113.865	149.265	119.701	107.498	131.387	122.18	155.517	136.855			41.1958	119.645	5.73332	13
	41.5642	67.9846	76.31	71.5546	74.5686	71.0779	71.0586	63.0303	62.6415	71.0626	62.9557	69.6793	59.0791	65.2134		80.7396	82.6599	83.247	64.2633	84.5815	76	84.9829	87.9004	72.8111	75.2174	77.2647	86.2715	82.1875			118.762	108.321	116.341	86.1802	118.998	106.954	134.829	140.323	102.46	119.477	110.886	146.027	126.029			41.5642	118.122	4.49935	13
	41.9324	69.7203	71.179	61.0805	70.663	79.5091	73.8739	67.8788	67.4528	68.3112	67.5862	70.4568	62.1199	65.3989		72.4191	67.5084	69.7755	71.7868	88.1057	77.5	82.7645	85.2313	72.6575	77.6812	82.0604	86.5835	82.5			103.871	94.8431	114.235	101.59	110.812	104.909	121.93	126.357	106.362	114.936	116.469	139.381	126.149			41.9324	113.988	3.38657	13
	42.3005	63.9344	68.7773	67.9162	67.6658	71.825	64.527	68.1818	62.5472	63.852	72.6108	67.7357	58.7315	64.1002		71.1864	70.202	85.6649	74.7649	96.3289	74.1667	77.8157	85.7651	65.745	74.9275	88.8099	81.4353	80			111.343	102.072	126.133	110.491	134.116	114.939	114.13	137.121	102.965	103.191	131.113	138.657	124.805			42.3005	119.313	3.70217	13
	42.6687	64.7059	77.9476	69.4598	73.7511	71.1846	65.7658	64.4444	67.1698	65.6546	64.335	72.1088	56.9939	61.1317		86.1325	76.936	77.3748	75.2351	81.351	84.1667	83.959	88.968	72.8111	83.4783	84.3694	87.6755	75			133.114	98.7022	111.395	102.012	114.282	127.979	130.281	132.452	110.9	129.756	117.003	153.833	122.686			42.6687	121.877	4.1397	13
	43.0369	68.3703	72.5983	69.129	82.9246	71.9317	70.045	67.2727	64.9057	63.852	64.4335	65.5005	54.9957	63.0798		68.4129	78.1145	78.5838	73.3542	83.9941	78.6667	82.4232	94.484	74.0399	85.5072	92.3623	79.5632	71.25			100.062	107.598	113.677	88.4589	116.769	112.309	122.521	145.571	115.956	132.706	141.01	144.672	112.952			43.0369	119.559	4.79786	13
	43.4051	69.7203	69.1048	76.075	84.9228	70.2241	66.6667	64.5455	68.9623	74.4782	66.8966	66.3751	63.6838	64.4712		74.7304	75.9259	80.4836	73.8245	85.9031	72.8333	83.1058	83.6299	72.043	75.7971	86.6785	95.4758	74.375			107.186	109.871	105.795	86.9313	122.327	109.25	128.755	121.269	96.7304	113.305	130.589	149.922	115.362			43.4051	115.176	4.43915	13
	43.7731	64.7059	73.0349	65.8214	81.0173	76.0939	63.5135	65.5556	70.7547	70.8729	62.4631	68.4159	56.8202	67.6252		71.0324	95.1178	89.2919	73.1975	85.7562	77.6667	90.273	86.2989	76.1905	84.058	87.7442	81.1232	79.6875			109.777	130.236	135.658	90.348	112.698	122.284	137.705	121.969	107.503	134.572	128.251	142.772	117.837			43.7731	122.432	4.07662	13
	47.2172	22.1794	24.4541	23.5943	27.4296	24.6531	20.1577	20.101	21.2264	24.6679	18.5222	18.6589	17.9844	21.1503		148.844	200.505	199.136	125.392	171.366	185.333	151.195	201.246	170.661	77.8261	144.227	153.354	170.781			671.094	819.922	844.004	457.14	695.107	919.419	752.174	948.09	691.832	420.178	772.968	852.708	807.466			47.2172	742.469	44.0343	13
	47.5434	18.2257	24.4541	26.5711	24.3415	22.8388	22.8604	23.3333	21.5094	27.1347	19.9015	21.8659	18.1581	22.2635		144.684	179.63	197.237	136.52	160.059	195.5	147.952	190.214	171.429	73.913	130.906	134.789	160.938			793.849	734.557	742.297	560.854	700.818	855.192	634.081	884.326	631.768	371.395	598.676	742.309	722.878			47.5434	690.231	37.3424	13
	47.9118	18.1292	21.7249	24.9173	24.8865	18.9968	22.8604	24.9495	19.5283	27.704	22.7586	21.8659	18.9401	24.026		134.052	184.512	204.318	138.871	154.479	190	140.444	200.712	175.269	80.5797	122.735	147.738	183.125			739.427	849.311	819.983	558.02	813.183	831.133	562.912	1027.8	632.648	354.062	561.31	780.029	762.196			47.9118	714.77	48.4063	13
	48.28	20.4436	23.3624	26.9019	27.6113	18.4632	24.3243	25.7576	19.434	25.4269	22.7586	17.8814	15.2911	22.5417		148.228	191.919	206.736	133.699	171.953	191	152.389	196.797	174.347	80.8696	122.202	142.59	166.719			725.059	821.486	768.481	484.219	931.329	785.222	591.628	1012.65	685.679	355.336	683.404	932.504	739.6			48.28	732.046	50.5391	13
	48.6482	25.5545	21.9432	21.1687	23.3424	16.4354	23.8739	22.9293	22.4528	26.6603	18.8177	21.0884	18.4188	21.6141		134.823	187.71	187.565	137.618	167.107	187	151.706	179.537	168.356	71.5942	129.663	148.83	184.844			527.59	855.437	886.048	589.56	1016.75	783.283	661.627	799.62	631.486	380.461	614.851	808.034	855.2			48.6482	723.842	48.1569	13
	49.0164	18.6114	23.69	24.5865	26.158	23.0523	26.6892	24.3434	22.7358	25.2372	19.3103	23.9067	14.9435	20.4082		145.455	173.569	193.782	116.144	175.037	185.833	150.171	182.206	173.425	77.5362	125.4	168.799	167.344			781.536	732.669	788.164	444.01	759.303	696.287	616.884	801.406	687.182	401.527	524.538	1129.58	819.984			49.0164	706.39	51.8987	13
RAW DATA		Fluorescence Fura2 (380 nm)														Fluorescence Fura2 (340 nm)
		2 mM Ca2+														2 mM Ca2+
		1206	1207	1174	1250	1288	1249	1142	1257	1221	1230	1201	1291	1210		736	746	759	701	672	717	723	692	767	740	787	698	789
		1245	1134	1221	1177	1233	1074	1133	1378	1262	1308	1217	1314	1188		738	736	738	727	769	702	674	671	689	739	694	670	657
		1194	1223	1193	1143	1193	1095	1129	1275	1301	1199	1185	1309	1241		666	718	707	707	751	703	714	712	776	726	678	713	689
		1264	1197	1191	1135	1134	1049	1183	1308	1206	1245	1138	1314	1229		719	638	702	752	690	728	745	755	696	744	680	734	738
		1195	1203	1159	1147	1190	1059	1255	1237	1340	1294	1236	1233	1311		690	696	679	675	686	668	699	664	688	675	705	634	727
		1199	1151	1168	1091	1129	1113	1087	1367	1264	1200	1208	1315	1287		693	691	710	654	659	701	682	707	697	637	768	660	710
		1153	1142	1159	1152	1120	1041	1009	1258	1173	1300	1225	1312	1308		641	751	641	718	735	777	692	670	689	665	683	637	741
		1159	1031	1080	1111	1108	1037	1141	1282	1277	1245	1283	1255	1263		621	677	725	679	661	673	756	676	679	704	742	610	678
		1102	1160	1089	1064	1159	1188	1090	1332	1254	1242	1225	1238	1310		738	672	630	761	723	747	675	644	682	647	698	708	717
		1166	1168	1119	1176	1134	1059	1106	1208	1171	1235	1205	1231	1339		655	704	662	710	698	639	665	641	655	693	676	659	651
		1099	1049	1076	1143	1093	1194	1086	1210	1284	1285	1224	1217	1205		702	667	679	679	715	623	676	683	653	729	686	676	699
		1102	1120	1201	1094	1124	1084	1080	1194	1092	1184	1173	1247	1233		672	681	640	711	677	738	668	637	615	655	652	661	616
		1099	1092	1111	1112	1118	1114	1113	1206	1231	1239	1181	1134	1198		688	686	645	694	693	620	672	651	690	706	652	673	689
		1033	1046	1049	1061	1163	1047	1060	1256	1220	1149	1240	1129	1243		656	620	692	657	682	689	670	685	618	671	646	622	714
		955	1054	1061	1040	1077	1039	1061	1216	1173	1193	1100	1187	1276		622	662	708	664	697	643	662	637	633	630	626	650	593
		1042	1094	1037	1081	1068	982	1098	1247	1217	1200	1156	1220	1302		675	598	646	662	667	607	720	687	623	655	684	653	682
		1069	1074	1077	1082	1021	1073	1068	1271	1130	1240	1073	1149	1168		674	684	644	628	690	644	685	657	601	696	628	605	590
		1041	1097	1016	1024	1092	1134	1033	1154	1101	1198	1073	1085	1246		616	662	719	656	656	653	628	599	589	714	639	657	631
		1093	1072	1063	1029	1035	1020	1028	1111	1134	1184	1150	1147	1175		686	715	632	624	642	633	678	565	667	671	653	624	632
		980	894	922	935	989	926	1061	1127	1070	1137	1175	1070	1141		659	578	719	670	627	621	618	615	594	611	590	573	653
		949	952	895	983	902	949	1144	1100	1083	1095	1099	1104	1057		634	615	638	623	667	595	597	579	627	602	621	606	607
		1039	917	965	980	1066	921	941	1095	1117	1098	1056	1080	1057		607	583	624	544	678	649	624	625	708	638	587	612	581
		973	959	1007	933	931	924	946	1023	1030	1051	1101	1073	1150		610	510	593	591	613	617	621	572	581	572	627	573	542
		888	970	956	926	955	946	993	990	1037	1099	1105	1026	1058		603	538	659	594	672	651	642	598	570	630	628	595	559
		1039	948	1001	963	902	876	950	1114	1007	1072	1048	1050	1120		635	602	555	552	593	613	590	517	638	643	564	597	625
		1023	933	960	980	949	932	912	1058	1022	1032	1021	981	1115		613	539	585	534	626	591	575	559	633	628	613	574	612
		915	909	940	958	927	934	912	1054	1050	1031	1060	1020	979		627	572	566	587	639	550	608	546	672	581	540	600	588
		1037	916	907	1101	937	888	990	1060	1054	1015	1029	1151	1078		649	594	579	638	681	600	586	562	651	690	563	641	640
		924	909	924	1243	939	911	914	1031	1039	1022	1024	1072	1044		576	592	598	604	665	618	604	534	620	762	607	661	614
		939	960	829	1628	911	913	939	1074	1034	979	1075	966	961		587	591	622	561	631	612	629	575	560	884	575	632	624
		914	848	890	1546	930	888	948	1011	1027	1011	1094	996	986		594	628	601	530	605	581	607	565	599	772	544	655	606
		940	937	901	1335	908	843	912	1030	1019	951	928	1120	1021		572	583	669	569	653	610	554	631	578	774	568	702	571
		1039	872	838	1309	915	855	953	993	988	981	1001	1071	958		613	636	564	602	628	637	586	604	584	671	596	595	610
		955	900	904	1235	920	895	900	941	972	1046	985	962	1002		575	625	561	653	618	595	559	568	579	625	506	639	605
		935	910	818	1153	914	819	940	998	999	1040	981	1017	1063		620	571	539	597	655	656	625	544	502	644	613	630	552
		1007	846	940	1106	969	900	961	999	968	921	954	1019	1083		595	547	616	634	624	598	547	587	616	606	559	604	589
		975	847	887	1151	904	876	869	930	1017	912	936	980	1016		609	584	609	621	642	611	568	527	582	651	537	646	557
		978	874	864	1212	922	838	894	969	976	925	953	982	1025		588	600	548	614	636	601	596	533	536	690	554	612	595
		938	812	853	1140	849	798	928	1000	1021	946	907	966	1008		555	600	588	587	602	555	571	524	570	614	575	704	582
		989	875	790	1161	861	855	841	968	897	933	1119	974	1000		573	551	597	576	642	583	611	605	569	737	624	641	605
		917	887	802	1193	836	889	947	1079	956	1001	953	904	880		583	562	565	564	652	542	622	605	574	703	599	663	661
		984	861	828	1198	961	871	908	946	994	965	958	904	931		566	575	576	571	641	556	605	542	545	678	574	561	665
		967	872	897	1285	891	841	844	873	899	958	956	988	909		539	586	515	617	589	563	636	559	627	678	592	634	610
		936	905	934	1358	894	822	896	961	939	954	923	946	875		551	560	518	585	601	570	638	532	593	669	608	594	589
		906	848	853	1257	863	785	829	999	929	971	971	983	847		582	572	630	570	580	565	601	592	569	676	594	534	584
		942	882	760	1282	978	764	867	888	969	852	913	961	958		591	535	537	586	622	584	627	600	561	688	563	614	563
		961	857	878	1315	918	806	945	947	968	886	1024	965	929		542	518	532	530	570	571	572	548	509	732	562	585	590
		929	872	811	1316	1005	823	874	935	879	905	972	945	855		553	545	561	571	696	517	551	603	565	705	557	582	667
		879	820	903	1345	939	830	907	950	946	904	894	848	883		598	538	564	575	599	572	579	586	559	762	602	635	538
		996	830	856	1292	918	825	885	981	953	892	936	900	831		580	541	535	524	586	569	594	546	577	685	567	595	642
		998	772	795	1344	840	758	913	891	921	869	947	852	876		538	559	548	529	593	494	579	575	596	717	614	606	590
		885	865	852	1352	863	816	882	938	942	877	901	912	847		475	547	529	550	586	568	611	578	501	720	581	622	598
		830	840	852	1374	913	783	862	911	861	852	943	929	930		544	494	548	562	568	528	534	545	546	745	516	554	597
		903	879	853	1295	820	794	801	846	847	842	935	828	870		540	513	513	487	563	542	620	533	585	736	555	560	537
		886	828	855	1237	811	743	788	829	903	870	898	876	854		511	522	503	488	584	533	597	472	532	716	552	586	528
		898	756	810	1373	812	707	833	1022	909	868	961	856	866		521	491	535	508	589	541	593	542	575	717	555	569	536
		946	794	868	1402	910	779	854	887	830	877	998	829	819		510	553	538	525	574	564	559	522	519	722	606	557	569
		924	809	803	1247	871	732	895	898	800	831	918	872	886		565	544	538	548	623	532	586	471	553	758	543	619	586
		904	782	769	1428	851	737	823	922	875	876	860	901	873		537	485	550	535	582	507	642	535	576	731	562	606	634
		870	738	864	1478	869	814	750	894	914	815	934	780	876		553	559	529	561	542	515	565	605	579	742	525	506	527
		820	840	800	1380	887	771	812	909	939	825	877	845	851		572	534	486	525	557	568	554	585	507	745	547	559	561
		859	863	772	1345	855	723	825	890	872	793	892	868	797		535	565	537	523	590	547	570	567	536	716	533	610	550
		851	902	747	1406	875	732	777	791	879	851	908	880	829		546	506	545	452	643	522	622	544	545	793	518	611	513
		830	760	833	1355	796	765	865	884	915	847	893	873	832		508	533	542	510	610	525	645	564	527	732	543	561	614
		863	813	761	1379	878	764	788	824	795	795	816	849	845		494	553	536	523	547	485	578	508	543	663	560	574	591
		815	832	811	1314	832	747	802	875	943	841	868	850	835		598	518	512	546	546	511	566	537	502	753	615	572	592
		896	825	722	1299	814	766	744	846	708	908	877	881	702		523	542	490	552	541	477	575	572	483	757	563	611	538
		864	778	784	1269	848	683	790	845	849	798	832	826	796		505	507	511	495	619	488	594	528	513	662	579	586	563
		839	783	791	1287	812	784	773	909	848	749	809	814	822		521	505	540	535	632	524	555	564	575	682	552	550	532
		804	790	757	1264	818	714	773	899	827	789	906	749	797		525	560	510	467	569	492	568	525	551	736	553	595	526
		722	744	719	1307	865	758	714	831	840	810	825	817	751		498	563	450	490	595	512	594	574	578	678	565	576	514
		763	780	738	1366	844	739	735	876	836	779	817	824	808		512	536	526	530	549	486	567	489	530	640	539	568	627
		766	776	757	1324	808	691	852	860	922	782	859	790	874		504	535	512	554	657	513	545	529	518	698	526	576	507
		826	805	797	1305	733	679	727	852	877	739	784	768	786		544	544	481	498	552	467	525	521	561	650	515	579	546
		826	703	797	1222	760	694	683	872	795	831	836	866	745		473	550	532	464	565	468	495	559	498	599	577	616	509
		904	745	724	1140	808	644	683	845	828	765	797	789	737		561	551	530	521	564	506	536	509	533	666	521	577	573
		784	800	797	1221	878	751	709	910	860	762	790	812	796		562	564	476	491	572	457	497	528	480	680	499	611	537
		857	794	773	1198	779	706	696	855	925	839	851	801	830		560	518	475	557	602	515	556	540	468	672	539	500	499
		824	786	747	1288	748	690	672	802	838	801	835	774	781		559	556	498	506	547	513	499	478	534	758	521	542	522
		817	737	693	1352	739	660	694	843	797	738	811	836	785		575	521	462	516	579	550	516	519	499	730	526	591	606
		768	766	720	1237	816	730	770	806	815	828	833	842	814		524	537	514	528	616	520	562	561	506	700	495	545	510
		791	738	771	1191	756	721	730	779	853	784	850	796	842		496	473	474	478	614	498	540	500	453	686	480	551	539
		763	793	723	1187	764	659	662	890	880	779	874	812	782		495	532	518	529	587	536	495	523	462	675	527	538	534
		798	771	678	1218	814	667	688	841	790	752	866	775	861		527	505	487	509	552	494	543	502	496	696	542	545	507
		892	759	738	1058	755	633	725	827	836	719	832	784	740		556	525	470	483	657	466	615	535	522	573	504	542	527
		807	745	794	1085	738	706	758	730	832	718	783	744	703		517	494	466	495	646	486	537	511	502	597	521	537	506
		845	693	715	977	817	673	741	892	815	774	873	767	699		517	490	547	562	586	515	557	489	512	642	512	494	514
		821	731	710	995	717	684	677	855	842	794	783	824	785		525	494	486	547	560	430	503	534	491	602	538	566	501
		847	741	691	925	816	716	675	856	871	720	862	851	783		501	536	541	499	566	466	601	536	476	568	524	533	525
		839	719	689	968	786	709	756	887	785	720	898	788	772		488	522	501	542	627	453	551	504	537	624	476	551	503
		765	807	671	1046	855	687	682	780	781	766	808	766	845		550	530	459	478	618	484	527	505	502	566	573	536	556
		829	844	735	1030	767	651	669	860	774	718	771	767	765		520	504	497	511	597	430	498	520	541	628	496	550	522
		806	781	724	1077	791	669	716	811	880	718	825	808	746		533	474	499	533	562	475	536	489	543	608	503	516	475
		717	750	675	998	818	705	657	834	824	739	774	766	722		501	507	505	445	568	488	528	493	508	564	469	533	490
		711	763	795	943	743	653	683	783	789	796	811	713	802		497	471	475	487	579	517	523	537	445	591	466	539	468
		734	736	709	948	759	624	659	804	801	794	806	759	754		541	536	505	500	559	479	540	522	509	549	512	530	567
		761	779	764	1006	734	641	616	725	831	673	758	740	721		586	506	474	497	550	456	497	491	508	645	426	538	502
		796	705	659	925	759	698	692	819	809	755	820	797	729		525	525	491	517	557	429	492	493	498	573	506	543	498
		733	719	691	971	774	617	682	756	832	717	798	720	764		476	516	524	468	543	464	525	588	497	621	537	568	539
		692	782	749	1212	756	603	689	781	805	693	740	777	735		479	502	564	436	525	465	536	516	517	707	519	574	499
		749	745	730	1113	766	668	724	803	823	726	748	731	774		516	494	518	437	585	471	578	467	477	653	502	543	489
		804	715	695	1111	840	663	641	771	842	718	701	763	720		457	532	496	498	544	507	540	475	470	622	476	521	593
		752	740	727	855	695	661	656	751	815	777	785	759	724		557	519	477	476	623	469	505	541	480	552	506	527	505
		742	718	735	793	771	673	653	708	795	816	800	737	714		442	531	530	459	606	421	516	529	476	517	509	519	484
		703	728	686	817	705	690	647	756	825	729	814	751	846		490	525	493	529	649	463	566	530	510	501	516	531	506
		667	678	684	758	789	622	601	825	769	764	735	712	724		514	507	507	490	588	464	469	480	481	517	472	593	526
		753	660	702	939	770	625	657	788	805	780	796	724	748		494	570	471	503	557	437	517	474	452	608	514	523	509
		722	728	673	965	742	617	663	758	766	833	798	821	754		450	495	514	485	598	470	520	523	460	628	480	579	497
		673	700	742	1010	741	643	682	806	824	699	790	729	747		502	528	512	478	606	455	506	510	482	626	493	567	509
		731	721	691	1080	726	652	723	725	735	656	717	709	752		488	501	488	498	562	495	499	509	521	661	486	490	547
		750	741	743	1055	698	593	750	755	771	712	726	705	703		490	542	507	463	604	501	491	533	474	649	477	504	528
		771	676	699	965	690	650	718	687	824	664	803	743	676		528	486	524	497	544	448	500	514	539	589	513	583	508
		736	748	693	898	809	650	733	737	696	689	823	720	747		519	478	511	443	564	516	471	468	515	576	542	541	566
		628	779	665	805	805	659	674	763	838	730	778	770	766		520	535	469	472	662	439	492	564	517	526	499	489	484
		689	628	750	859	737	658	811	780	808	733	740	691	708		460	485	479	496	547	486	500	490	453	567	526	528	582
		691	725	706	849	693	629	741	723	783	716	712	748	729		514	460	495	466	615	484	536	479	544	592	506	456	516
		649	693	732	900	714	630	705	800	801	691	763	722	743		492	534	525	469	621	470	510	533	449	612	502	531	525
		725	649	686	788	699	645	748	759	722	798	683	726	744		499	461	480	497	565	505	534	492	519	585	493	560	584
		695	722	635	867	711	590	758	691	697	738	841	711	718		489	493	536	495	633	529	513	529	571	602	526	520	540
		756	749	620	1014	702	676	730	796	763	761	791	781	728		486	506	481	427	566	448	514	531	471	626	461	574	520
		712	703	664	906	664	638	642	760	786	838	718	713	735		501	453	504	501	584	479	520	499	503	522	452	572	534
		732	671	646	842	724	659	731	787	750	694	734	746	700		477	475	510	512	588	441	514	490	493	546	485	496	543
		663	677	650	829	735	531	695	742	735	721	751	707	775		502	550	467	486	622	478	486	534	485	544	456	553	524
		694	723	636	801	739	588	639	666	731	680	767	780	713		473	465	527	474	584	516	465	455	464	511	473	520	536
		623	625	628	836	731	650	700	740	704	750	785	758	742		544	462	510	497	559	508	456	519	461	529	448	536	554
		630	679	573	836	756	633	706	715	733	650	766	737	754		490	541	544	508	620	468	506	481	463	501	524	517	456
		731	687	650	773	675	629	643	792	737	740	747	726	719		545	512	482	436	567	489	447	502	514	530	537	529	558
		622	683	707	736	695	649	643	750	848	690	755	768	709		505	476	481	461	542	468	475	436	485	525	453	530	530
		720	710	676	811	727	602	580	802	770	769	691	725	727		476	460	515	483	557	448	448	506	493	565	446	519	476
		696	705	708	803	660	641	668	728	775	693	718	710	718		493	541	469	420	572	404	482	560	508	564	528	524	508
		733	731	608	774	719	614	650	738	722	652	749	734	662		503	497	503	499	601	401	473	478	474	488	499	511	516
		678	710	639	798	693	585	592	750	742	712	698	778	748		507	499	464	489	612	489	471	489	459	549	508	539	470
		666	698	616	661	738	593	642	712	705	713	709	732	692		494	533	522	429	609	502	489	479	521	521	515	555	530
		690	702	631	760	751	598	595	796	749	719	750	718	697		483	440	500	491	625	481	502	508	466	492	503	536	460
		685	705	619	737	746	574	618	661	711	720	695	743	675		478	554	476	490	570	430	488	495	508	523	522	522	478
		736	636	650	793	699	578	676	759	759	678	779	735	665		505	501	485	457	492	526	478	501	449	513	462	568	501
		625	642	665	808	654	658	658	707	802	689	775	759	630		495	453	480	513	585	429	446	486	457	533	474	556	470
		699	668	643	1011	653	603	617	658	758	666	708	760	768		495	428	447	431	598	460	496	445	432	575	455	532	462
		712	716	677	1070	634	619	591	753	649	659	753	689	675		476	503	482	478	614	454	459	431	487	657	500	571	457
		697	718	647	1048	711	620	601	687	738	674	733	687	688		478	462	502	473	573	477	531	436	490	602	490	595	559
		705	699	649	821	666	631	624	664	749	639	717	680	703		524	491	482	410	576	456	498	494	474	519	435	553	526
		723	652	554	778	745	656	672	715	720	686	725	715	705		470	401	404	458	600	465	485	479	473	536	462	555	528
		663	630	616	745	673	573	675	663	673	737	697	676	691		462	417	496	477	656	445	456	482	428	517	500	522	512
		671	714	630	812	667	584	638	712	692	653	742	656	659		559	457	448	480	554	505	492	500	474	576	475	562	480
		709	665	627	913	674	622	666	688	673	654	674	633	680		444	464	455	468	572	472	483	531	482	590	520	510	456
		723	633	690	935	658	592	639	731	785	679	683	733	695		485	451	466	471	585	437	487	470	469	523	488	612	476
		671	669	597	892	713	564	649	750	747	634	704	654	729		461	565	517	467	584	466	529	485	496	580	494	520	510
		230	224	214	302	231	179	199	225	260	188	192	207	228		966	1191	1153	800	1167	1112	886	1131	1111	537	812	983	1093
		189	224	241	268	214	203	231	228	286	202	225	209	240		939	1067	1142	871	1090	1173	867	1069	1116	510	737	864	1030
		188	199	226	274	178	203	247	207	292	231	225	218	259		870	1096	1183	886	1052	1140	823	1128	1141	556	691	947	1172
		212	214	244	304	173	216	255	206	268	231	184	176	243		962	1140	1197	853	1171	1146	893	1106	1135	558	688	914	1067
		265	201	192	257	154	212	227	238	281	191	217	212	233		875	1115	1086	878	1138	1122	889	1009	1096	494	730	954	1183
		193	217	223	288	216	237	241	241	266	196	246	172	220		944	1031	1122	741	1192	1115	880	1024	1129	535	706	1082	1071

## Sheet: Mg
Empty Liposomes
POPE:POPG
Mg2+
NORMALIZED DATA		Mg2+									Mg2+							Neg 5 mM Mg2+
	Time (min)	5 mM									5 mM						Time (min)	Mean	SEM	N
	-8.24797	78.5714	77.7778	76.25	77.2152	75.9036	80.5195	75	73.2558		88.9734	86.2745	88.0309	89.1129	87.3077		-8.24797	81.0917	1.64408	13
	-8.15982	78.5714	81.4815	78.75	81.0127	74.6988	80.5195	75	74.4186		89.7338	87.8431	87.2587	89.9194	88.0769		-8.15982	82.0988	1.61457	13
	-8.0718	79.7619	81.4815	77.5	78.481	77.1084	81.8182	76.1905	72.093		92.3954	89.8039	90.7336	93.1452	88.0769		-8.0718	82.9684	1.94139	13
	-7.98403	79.7619	80.2469	81.25	79.7468	77.1084	81.8182	76.1905	74.4186		91.635	90.5882	90.7336	93.5484	89.6154		-7.98403	83.5894	1.84373	13
	-7.89628	83.3333	79.0123	78.75	81.0127	78.3133	81.8182	73.8095	75.5814		90.4943	91.3725	88.8031	94.3548	89.6154		-7.89628	83.5593	1.84227	13
	-7.80825	82.1429	81.4815	81.25	79.7468	77.1084	84.4156	78.5714	75.5814		92.0152	91.3725	90.3475	94.3548	90		-7.80825	84.4914	1.75854	13
	-7.72048	82.1429	81.4815	81.25	81.0127	79.5181	84.4156	78.5714	75.5814		92.3954	89.4118	89.5753	93.5484	90.7692		-7.72048	84.5903	1.62157	13
	-7.63247	85.7143	81.4815	81.25	81.0127	78.3133	81.8182	77.381	74.4186		93.1559	90.1961	89.9614	93.1452	90.3846		-7.63247	84.4794	1.74982	13
	-7.54472	84.5238	77.7778	82.5	77.2152	78.3133	81.8182	79.7619	73.2558		93.9163	90.5882	90.7336	93.1452	90.3846		-7.54472	84.1488	1.90976	13
	-7.45722	82.1429	82.716	85	82.2785	79.5181	81.8182	77.381	75.5814		94.6768	90.1961	91.5058	93.5484	92.6923		-7.45722	85.312	1.79327	13
	-7.36947	82.1429	81.4815	78.75	81.0127	80.7229	81.8182	78.5714	75.5814		95.8175	91.3725	91.5058	94.3548	92.6923		-7.36947	85.0634	1.9291	13
	-7.2817	79.7619	82.716	81.25	81.0127	78.3133	80.5195	76.1905	74.4186		93.5361	91.3725	91.8919	92.7419	93.4615		-7.2817	84.399	1.96897	13
	-7.19393	82.1429	81.4815	81.25	79.7468	75.9036	81.8182	76.1905	74.4186		93.1559	91.7647	94.2085	93.1452	91.9231		-7.19393	84.3961	2.04321	13
	-7.10592	83.3333	82.716	81.25	81.0127	79.5181	79.2208	79.7619	74.4186		94.2966	92.1569	92.6641	91.129	93.0769		-7.10592	84.9658	1.86049	13
	-7.01815	82.1429	85.1852	80	83.5443	79.5181	83.1169	78.5714	74.4186		92.7757	90.9804	91.5058	93.9516	91.9231		-7.01815	85.2026	1.76919	13
	-6.93013	85.7143	80.2469	81.25	81.0127	78.3133	80.5195	78.5714	75.5814		92.7757	91.7647	91.8919	93.1452	93.4615		-6.93013	84.9422	1.85967	13
	-6.84237	83.3333	83.9506	80	79.7468	80.7229	83.1169	77.381	77.907		93.5361	91.7647	91.1197	92.7419	92.3077		-6.84237	85.2022	1.70888	13
	-6.75463	83.3333	82.716	77.5	82.2785	77.1084	80.5195	77.381	75.5814		93.5361	90.5882	90.3475	93.1452	92.6923		-6.75463	84.3636	1.88398	13
	-6.66687	83.3333	85.1852	82.5	81.0127	80.7229	81.8182	77.381	76.7442		95.4373	90.1961	92.278	92.7419	96.1538		-6.66687	85.808	1.868	13
	-6.57912	83.3333	82.716	82.5	81.0127	80.7229	80.5195	78.5714	75.5814		92.7757	89.4118	91.8919	93.1452	91.9231		-6.57912	84.9311	1.67979	13
	-6.4911	84.5238	82.716	82.5	81.0127	80.7229	81.8182	78.5714	74.4186		92.7757	93.7255	91.1197	93.9516	92.6923		-6.4911	85.4268	1.82624	13
	-6.40332	83.3333	82.716	80	82.2785	80.7229	80.5195	78.5714	75.5814		93.1559	93.3333	92.278	92.7419	93.0769		-6.40332	85.2545	1.82937	13
	-6.31557	82.1429	83.9506	81.25	81.0127	79.5181	81.8182	78.5714	76.7442		91.2548	94.902	91.5058	93.9516	94.2308		-6.31557	85.4502	1.8451	13
	-6.22782	83.3333	80.2469	83.75	78.481	77.1084	80.5195	79.7619	76.7442		93.1559	92.1569	90.7336	95.5645	92.6923		-6.22782	84.9422	1.90937	13
	-6.14005	83.3333	82.716	81.25	83.5443	79.5181	79.2208	78.5714	76.7442		92.0152	91.3725	91.5058	93.5484	94.2308		-6.14005	85.1978	1.76692	13
	-6.05228	83.3333	81.4815	83.75	81.0127	79.5181	83.1169	79.7619	73.2558		93.1559	94.1176	91.8919	95.9677	93.4615		-6.05228	85.6788	1.98492	13
	-5.96452	82.1429	83.9506	83.75	82.2785	78.3133	81.8182	79.7619	76.7442		92.3954	91.3725	92.6641	95.1613	93.4615		-5.96452	85.678	1.77515	13
	-5.87677	84.5238	83.9506	80	82.2785	79.5181	80.5195	80.9524	76.7442		92.7757	92.1569	93.8224	93.9516	93.8462		-5.87677	85.7723	1.80553	13
	-5.78902	82.1429	83.9506	81.25	81.0127	79.5181	83.1169	79.7619	74.4186		94.2966	93.7255	93.0502	95.1613	96.1538		-5.78902	85.9661	2.04927	13
	-5.70125	84.5238	81.4815	81.25	84.8101	78.3133	81.8182	82.1429	75.5814		93.1559	94.902	93.0502	97.1774	93.8462		-5.70125	86.3117	1.98062	13
	-5.61348	82.1429	81.4815	81.25	82.2785	81.9277	81.8182	82.1429	76.7442		93.9163	93.7255	93.8224	93.9516	93.0769		-5.61348	86.0214	1.79596	13
	-5.52568	85.7143	85.1852	82.5	82.2785	83.1325	84.4156	78.5714	75.5814		94.6768	94.1176	93.0502	94.7581	94.2308		-5.52568	86.7856	1.84082	13
	-5.43797	83.3333	83.9506	80	83.5443	80.7229	80.5195	80.9524	77.907		95.057	92.549	93.0502	97.9839	94.2308		-5.43797	86.4462	1.93748	13
	-5.3502	84.5238	85.1852	83.75	83.5443	81.9277	81.8182	79.7619	79.0698		94.2966	92.549	93.4363	92.7419	95.3846		-5.3502	86.7684	1.65603	13
	-5.26218	83.3333	82.716	81.25	81.0127	80.7229	81.8182	83.3333	75.5814		93.9163	92.1569	91.5058	95.1613	94.6154		-5.26218	85.9326	1.81749	13
	-5.17443	85.7143	83.9506	81.25	86.0759	80.7229	80.5195	82.1429	76.7442		95.8175	93.3333	92.6641	94.3548	93.8462		-5.17443	86.7028	1.79885	13
	-5.08667	83.3333	83.9506	80	83.5443	81.9277	80.5195	80.9524	76.7442		94.2966	91.7647	92.278	93.9516	94.2308		-5.08667	85.9611	1.76058	13
	-4.9989	83.3333	83.9506	82.5	82.2785	80.7229	83.1169	80.9524	77.907		92.3954	92.9412	92.6641	95.1613	94.2308		-4.9989	86.3196	1.69537	13
	-4.91088	85.7143	83.9506	82.5	84.8101	81.9277	83.1169	77.381	80.2326		95.057	93.7255	92.278	94.3548	93.0769		-4.91088	86.7789	1.68614	13
	-4.82313	80.9524	81.4815	82.5	81.0127	81.9277	77.9221	82.1429	76.7442		93.5361	91.3725	92.278	92.3387	91.9231		-4.82313	85.0871	1.70764	13
	-4.73537	84.5238	86.4198	82.5	83.5443	83.1325	83.1169	80.9524	79.0698		93.1559	92.9412	93.8224	93.9516	95		-4.73537	87.087	1.60153	13
	-4.64735	84.5238	83.9506	82.5	83.5443	80.7229	81.8182	80.9524	76.7442		94.2966	92.549	92.6641	93.9516	91.5385		-4.64735	86.1351	1.66206	13
	-4.5596	85.7143	82.716	85	86.0759	83.1325	81.8182	80.9524	77.907		94.6768	91.3725	92.6641	91.9355	93.8462		-4.5596	86.7547	1.53277	13
	-4.47183	84.5238	83.9506	82.5	81.0127	83.1325	83.1169	82.1429	79.0698		94.6768	91.7647	91.8919	91.9355	93.4615		-4.47183	86.3984	1.50856	13
	-4.3838	85.7143	85.1852	81.25	81.0127	80.7229	80.5195	82.1429	79.0698		95.057	91.3725	92.6641	92.7419	92.3077		-4.3838	86.1354	1.61975	13
	-4.29605	85.7143	85.1852	82.5	83.5443	81.9277	83.1169	80.9524	79.0698		92.7757	92.1569	91.8919	93.9516	93.0769		-4.29605	86.6049	1.48608	13
	-4.20828	82.1429	82.716	81.25	83.5443	81.9277	81.8182	78.5714	79.0698		93.9163	92.549	90.7336	93.9516	95		-4.20828	85.9378	1.72404	13
	-4.12055	86.9048	82.716	83.75	82.2785	81.9277	81.8182	80.9524	79.0698		90.4943	90.1961	90.7336	91.9355	93.0769		-4.12055	85.8349	1.34751	13
	-4.03278	86.9048	82.716	85	82.2785	83.1325	83.1169	80.9524	77.907		93.5361	90.1961	91.1197	91.129	93.4615		-4.03278	86.2654	1.42244	13
	-2.76583	84.5238	87.6543	85	86.0759	81.9277	84.4156	80.9524	82.5581		88.9734	87.451	88.0309	88.3065	88.0769		-2.76583	85.6882	0.741537	13
	-2.67823	84.5238	86.4198	83.75	84.8101	81.9277	83.1169	85.7143	79.0698		88.2129	89.4118	88.0309	87.5	88.8462		-2.67823	85.4872	0.837554	13
	-2.59022	84.5238	83.9506	86.25	87.3418	83.1325	85.7143	83.3333	79.0698		90.1141	89.0196	88.0309	88.3065	87.3077		-2.59022	85.8534	0.834373	13
	-2.5022	86.9048	85.1852	85	86.0759	84.3373	81.8182	80.9524	79.0698		90.1141	86.6667	85.7143	89.5161	86.5385		-2.5022	85.2226	0.871538	13
	-2.41445	84.5238	85.1852	85	86.0759	84.3373	84.4156	82.1429	79.0698		89.3536	88.6275	88.8031	89.9194	86.9231		-2.41445	85.7213	0.851998	13
	-2.32642	84.5238	88.8889	85	84.8101	84.3373	83.1169	82.1429	79.0698		88.5932	88.6275	85.3282	85.8871	87.6923		-2.32642	85.2321	0.785339	13
	-2.23867	85.7143	87.6543	83.75	86.0759	85.5422	83.1169	83.3333	81.3953		87.8327	87.0588	86.8726	86.6935	86.1538		-2.23867	85.4764	0.548338	13
	-2.15063	85.7143	87.6543	87.5	88.6076	85.5422	83.1169	80.9524	80.2326		88.9734	86.6667	85.3282	86.2903	87.3077		-2.15063	85.6836	0.756854	13
	-2.06288	85.7143	85.1852	85	87.3418	84.3373	85.7143	83.3333	76.7442		88.5932	87.8431	86.8726	87.0968	87.6923		-2.06288	85.4976	0.842924	13
	-1.97512	85.7143	85.1852	85	83.5443	85.5422	83.1169	82.1429	79.0698		90.4943	86.6667	84.9421	86.2903	88.0769		-1.97512	85.0604	0.775787	13
	-1.8871	84.5238	87.6543	88.75	86.0759	86.747	84.4156	82.1429	79.0698		90.1141	86.6667	85.7143	85.4839	85.3846		-1.8871	85.5956	0.778019	13
	-1.79933	82.1429	86.4198	86.25	84.8101	85.5422	83.1169	82.1429	79.0698		89.7338	86.2745	87.6448	85.0806	85.3846		-1.79933	84.8933	0.759484	13
	-1.71158	84.5238	82.716	86.25	83.5443	84.3373	81.8182	83.3333	80.2326		88.9734	86.2745	86.1004	86.2903	85		-1.71158	84.5688	0.635815	13
	-1.62357	85.7143	86.4198	85	86.0759	81.9277	83.1169	82.1429	77.907		87.4525	86.6667	86.4865	85.4839	86.5385		-1.62357	84.6871	0.748816	13
	-1.5358	85.7143	86.4198	85	86.0759	81.9277	83.1169	80.9524	79.0698		87.4525	86.6667	85.3282	85.8871	85.3846		-1.5358	84.5381	0.694675	13
	-1.44778	85.7143	85.1852	85	86.0759	84.3373	85.7143	85.7143	79.0698		88.9734	85.098	85.7143	86.2903	85		-1.44778	85.2221	0.597326	13
	-1.35977	85.7143	85.1852	85	88.6076	84.3373	83.1169	82.1429	77.907		89.3536	87.451	84.9421	86.6935	86.9231		-1.35977	85.1826	0.828638	13
	-1.27175	85.7143	87.6543	88.75	88.6076	83.1325	84.4156	83.3333	79.0698		88.5932	85.4902	83.3977	85.4839	85		-1.27175	85.2802	0.765186	13
	-1.18373	88.0952	87.6543	85	86.0759	84.3373	83.1169	84.5238	79.0698		88.5932	87.0588	84.9421	85.4839	86.1538		-1.18373	85.3927	0.688164	13
	-1.0957	86.9048	87.6543	83.75	86.0759	84.3373	84.4156	83.3333	79.0698		87.4525	86.2745	84.9421	86.6935	84.6154		-1.0957	85.0399	0.634264	13
	0	100	100	100	100	100	100	100	100		100	100	100	100	100		0	100	0	13
	0.0876167	100	100	98.75	98.7342	101.205	100	97.619	97.6744		100.76	98.8235	100.386	102.419	99.6154		0.0876167	99.6913	0.38035	13
	0.17565	101.19	98.7654	100	101.266	100	100	100	100		101.901	99.2157	100.772	100.403	98.4615		0.17565	100.152	0.272672	13
	0.2634	100	100	97.5	101.266	101.205	98.7013	96.4286	98.8372		100.76	98.0392	99.2278	100.806	100.385		0.2634	99.4736	0.418426	13
	0.351167	101.19	97.5309	96.25	102.532	102.41	98.7013	98.8095	97.6744		101.141	98.4314	98.8417	99.1935	98.8462		0.351167	99.3501	0.53047	13
	0.439183	100	101.235	98.75	98.7342	103.614	98.7013	100	100		101.901	98.4314	96.139	101.613	98.0769		0.439183	99.7843	0.543712	13
	0.526933	101.19	104.938	101.25	100	100	98.7013	98.8095	100		101.901	98.8235	96.139	100.403	99.6154		0.526933	100.136	0.568653	13
	0.61495	102.381	102.469	101.25	101.266	102.41	98.7013	102.381	100		102.662	96.8627	98.0695	98.3871	98.0769		0.61495	100.378	0.5839	13
	0.702717	98.8095	101.235	100	105.063	101.205	98.7013	98.8095	101.163		101.901	98.0392	96.139	99.1935	97.6923		0.702717	99.8424	0.632987	13
	0.790733	102.381	101.235	100	101.266	101.205	102.597	100	98.8372		101.141	100.392	97.2973	99.1935	97.3077		0.790733	100.219	0.469441	13
	0.87875	102.381	102.469	97.5	101.266	98.7952	97.4026	98.8095	102.326		101.521	98.4314	97.6834	99.5968	96.1538		0.87875	99.5642	0.605895	13
	0.9665	100	100	96.25	102.532	101.205	101.299	100	96.5116		99.6198	98.4314	98.0695	100	97.6923		0.9665	99.3546	0.519002	13
	1.05453	100	101.235	100	103.797	101.205	102.597	101.19	100		98.8593	98.0392	97.2973	98.7903	97.6923		1.05453	100.054	0.535662	13
	1.1423	101.19	100	97.5	102.532	100	98.7013	97.619	100		100.76	97.6471	95.7529	97.9839	97.6923		1.1423	99.0292	0.523314	13
	1.23032	100	100	101.25	101.266	103.614	101.299	98.8095	97.6744		101.521	99.2157	97.6834	97.9839	97.6923		1.23032	99.8469	0.519626	13
	1.31833	102.381	98.7654	95	101.266	102.41	100	97.619	103.488		100.76	98.0392	93.8224	97.1774	96.1538		1.31833	98.991	0.837998	13
	1.40608	100	101.235	97.5	102.532	101.205	100	97.619	102.326		99.6198	96.0784	96.139	95.1613	96.9231		1.40608	98.949	0.696437	13
	1.49385	102.381	101.235	101.25	101.266	102.41	101.299	101.19	104.651		99.6198	97.6471	94.2085	95.5645	95.7692		1.49385	99.8839	0.867955	13
	1.58187	101.19	103.704	100	103.797	101.205	98.7013	98.8095	105.814		102.662	96.8627	96.139	95.9677	95		1.58187	99.9886	0.950725	13
	1.66962	102.381	100	100	101.266	98.7952	98.7013	100	102.326		97.7186	96.4706	94.2085	97.9839	96.1538		1.66962	98.9234	0.673733	13
	1.75765	100	102.469	101.25	101.266	101.205	100	98.8095	102.326		100.76	96.8627	95.7529	96.7742	96.1538		1.75765	99.5099	0.660582	13
	1.84542	102.381	98.7654	98.75	102.532	100	98.7013	98.8095	100		100.38	96.8627	93.8224	97.9839	95		1.84542	98.7683	0.696886	13
	1.93317	100	101.235	96.25	102.532	103.614	103.896	97.619	98.8372		98.8593	96.4706	96.139	95.5645	96.9231		1.93317	99.0723	0.816019	13
	2.0212	100	104.938	102.5	101.266	102.41	97.4026	101.19	98.8372		98.8593	98.8235	94.9807	97.5806	96.1538		2.0212	99.6109	0.776737	13
	2.1092	103.571	101.235	101.25	102.532	103.614	101.299	101.19	101.163		100	96.0784	96.5251	97.9839	95.7692		2.1092	100.17	0.75453	13
	2.19697	102.381	101.235	101.25	103.797	102.41	97.4026	100	100		100.76	97.2549	94.2085	97.1774	96.9231		2.19697	99.6	0.771027	13
	2.28473	102.381	101.235	98.75	98.7342	100	101.299	100	101.163		101.141	95.2941	96.139	95.9677	95.3846		2.28473	99.0375	0.703782	13
	2.37247	102.381	103.704	102.5	101.266	102.41	100	98.8095	100		98.4791	95.6863	95.7529	95.5645	94.6154		2.37247	99.3206	0.862645	13
	2.46025	100	103.704	97.5	101.266	103.614	101.299	98.8095	103.488		99.6198	94.1176	95.7529	95.1613	96.1538		2.46025	99.2682	0.926583	13
	2.54827	103.571	100	101.25	103.797	101.205	100	98.8095	98.8372		100.76	95.2941	94.9807	95.5645	96.1538		2.54827	99.248	0.832017	13
	2.63628	102.381	100	98.75	101.266	98.7952	100	100	103.488		98.4791	96.8627	94.5946	95.5645	95		2.63628	98.8601	0.766319	13
	2.7238	102.381	103.704	98.75	100	101.205	103.896	102.381	102.326		100	96.8627	93.8224	95.1613	96.5385		2.7238	99.7713	0.917698	13
	2.81182	104.762	97.5309	100	105.063	102.41	102.597	101.19	101.163		101.141	96.4706	94.9807	96.7742	97.3077		2.81182	100.107	0.899389	13
	2.89982	103.571	103.704	101.25	102.532	101.205	101.299	96.4286	102.326		98.8593	96.4706	97.2973	96.371	96.5385		2.89982	99.8347	0.80704	13
	2.98758	103.571	101.235	100	100	100	100	97.619	104.651		99.2395	96.8627	95.3668	96.371	95.7692		2.98758	99.2835	0.792045	13
	3.07535	103.571	100	97.5	105.063	102.41	101.299	102.381	100		101.141	95.6863	94.2085	97.1774	95.7692		3.07535	99.7082	0.933748	13
	3.16337	100	102.469	100	105.063	100	101.299	101.19	103.488		98.4791	96.8627	94.5946	95.5645	96.5385		3.16337	99.6576	0.871605	13
	3.25112	101.19	104.938	102.5	101.266	102.41	102.597	101.19	103.488		98.0989	97.2549	94.9807	95.1613	96.5385		3.25112	100.124	0.917541	13
	3.33913	104.762	102.469	102.5	103.797	104.819	100	101.19	98.8372		100	95.6863	93.8224	95.5645	98.4615		3.33913	100.147	0.993469	13
	3.42688	100	100	98.75	100	102.41	98.7013	98.8095	102.326		98.8593	98.0392	96.139	95.9677	96.9231		3.42688	98.9942	0.557633	13
	3.51467	102.381	98.7654	100	101.266	97.5904	102.597	98.8095	103.488		99.6198	95.6863	94.2085	98.7903	96.9231		3.51467	99.2404	0.762334	13
	3.60242	104.762	102.469	100	101.266	106.024	101.299	102.381	100		99.2395	96.4706	94.9807	95.1613	95.3846		3.60242	99.9567	1.003	13
	3.69017	102.381	102.469	97.5	103.797	102.41	100	102.381	102.326		98.0989	96.8627	96.5251	96.371	95.3846		3.69017	99.7312	0.83353	13
	3.7782	101.19	102.469	102.5	101.266	104.819	102.597	102.381	101.163		99.6198	96.4706	93.8224	98.3871	97.6923		3.7782	100.337	0.838099	13
	3.86622	104.762	100	103.75	103.797	104.819	102.597	103.571	102.326		96.9582	96.4706	94.2085	97.9839	96.9231		3.86622	100.628	1.02202	13
	3.95398	98.8095	104.938	100	100	101.205	100	102.381	97.6744		97.7186	94.1176	94.2085	96.371	96.5385		3.95398	98.7663	0.866203	13
	4.042	105.952	100	100	100	102.41	102.597	98.8095	101.163		98.8593	94.5098	94.5946	96.7742	95		4.042	99.2823	0.947751	13
	4.12977	98.8095	102.469	100	100	101.205	101.299	102.381	100		98.0989	95.2941	96.139	95.9677	96.1538		4.12977	99.0628	0.700833	13
	4.21777	103.571	100	101.25	101.266	103.614	100	96.4286	102.326		98.8593	95.2941	95.7529	95.5645	96.9231		4.21777	99.2961	0.84479	13
	4.30553	98.8095	103.704	101.25	102.532	100	101.299	100	103.488		98.8593	96.4706	94.9807	95.1613	97.3077		4.30553	99.5278	0.815224	13
	4.39357	101.19	103.704	100	100	100	100	101.19	103.488		100	97.2549	95.3668	97.1774	94.6154		4.39357	99.5375	0.767544	13
	4.48132	104.762	103.704	97.5	106.329	102.41	98.7013	102.381	102.326		98.8593	94.902	94.9807	96.371	94.2308		4.48132	99.8043	1.13146	13
	4.56933	103.571	104.938	102.5	102.532	101.205	103.896	103.571	102.326		97.7186	94.1176	93.8224	95.9677	95.3846		4.56933	100.119	1.13211	13
	4.65735	104.762	102.469	103.75	101.266	100	103.896	101.19	100		98.8593	95.6863	94.2085	95.5645	94.6154		4.65735	99.7129	1.0193	13
	4.74512	101.19	100	100	98.7342	104.819	101.299	102.381	101.163		99.6198	96.4706	93.8224	95.9677	94.2308		4.74512	99.2075	0.902618	13
	4.83288	102.381	101.235	102.5	101.266	103.614	101.299	102.381	101.163		96.5779	94.1176	96.5251	97.1774	93.4615		4.83288	99.5152	0.956988	13
	4.92063	101.19	102.469	103.75	103.797	101.205	101.299	101.19	104.651		98.0989	95.6863	94.5946	95.5645	95		4.92063	99.8843	1.00679	13
	5.0084	100	101.235	100	102.532	102.41	101.299	101.19	104.651		99.2395	95.6863	93.8224	96.371	94.2308		5.0084	99.4359	0.941027	13
	5.09615	101.19	102.469	100	105.063	106.024	101.299	104.762	103.488		98.8593	96.4706	97.2973	95.9677	93.0769		5.09615	100.459	1.09919	13
	5.1839	102.381	102.469	100	102.532	104.819	101.299	102.381	103.488		98.8593	95.2941	94.2085	95.1613	93.4615		5.1839	99.7195	1.08325	13
	5.27167	98.8095	102.469	103.75	101.266	102.41	100	97.619	103.488		100.38	96.4706	93.8224	97.5806	94.2308		5.27167	99.4074	0.920418	13
	5.35943	103.571	103.704	98.75	101.266	98.7952	100	101.19	102.326		98.0989	96.0784	93.4363	95.1613	95		5.35943	99.029	0.9342	13
	5.44718	103.571	101.235	101.25	102.532	104.819	102.597	103.571	102.326		98.0989	96.4706	95.3668	94.7581	95		5.44718	100.123	1.01339	13
	5.53522	102.381	101.235	98.75	101.266	103.614	101.299	103.571	104.651		97.3384	95.6863	96.9112	96.371	94.2308		5.53522	99.7927	0.949447	13
	5.62302	104.762	103.704	103.75	100	101.205	100	97.619	102.326		98.0989	96.0784	95.3668	96.371	91.9231		5.62302	99.3233	1.06186	13
	5.71078	100	107.407	100	106.329	103.614	101.299	100	100		99.2395	94.1176	94.5946	97.5806	94.2308		5.71078	99.8779	1.16855	13
	5.79853	102.381	103.704	97.5	106.329	106.024	102.597	104.762	101.163		97.3384	95.2941	94.9807	96.371	95.3846		5.79853	100.295	1.18896	13
	5.8863	102.381	98.7654	102.5	101.266	102.41	100	103.571	101.163		94.6768	94.5098	96.5251	95.5645	95		5.8863	99.1025	0.946362	13
	5.97405	103.571	103.704	100	102.532	103.614	101.299	103.571	101.163		97.3384	95.2941	94.2085	94.3548	93.8462		5.97405	99.5766	1.10916	13
	6.06207	103.571	104.938	100	105.063	106.024	102.597	101.19	104.651		96.5779	94.5098	93.4363	97.5806	94.2308		6.06207	100.336	1.26964	13
	6.14983	105.952	103.704	101.25	106.329	101.205	100	104.762	103.488		99.6198	95.2941	96.5251	96.371	96.5385		6.14983	100.849	1.06581	13
	6.2376	104.762	103.704	98.75	103.797	103.614	103.896	101.19	101.163		96.9582	93.7255	94.5946	96.371	93.0769		6.2376	99.6618	1.18981	13
	6.32562	104.762	102.469	100	102.532	107.229	97.4026	101.19	101.163		97.3384	94.902	94.9807	95.9677	95.7692		6.32562	99.6696	1.09767	13
	6.41363	103.571	102.469	98.75	102.532	101.205	101.299	102.381	101.163		98.8593	95.2941	94.2085	97.1774	95		6.41363	99.5314	0.891855	13
	6.50138	101.19	103.704	102.5	103.797	103.614	100	101.19	104.651		98.4791	96.8627	92.6641	97.1774	95		6.50138	100.064	1.04638	13
	6.58915	105.952	103.704	100	102.532	102.41	101.299	98.8095	102.326		98.8593	92.549	96.5251	95.5645	94.6154		6.58915	99.6265	1.09082	13
	6.67692	104.762	103.704	102.5	105.063	106.024	100	102.381	102.326		98.4791	95.6863	93.0502	95.9677	94.6154		6.67692	100.351	1.21033	13
	6.76492	102.381	100	100	100	106.024	101.299	102.381	104.651		95.4373	93.7255	94.2085	94.3548	96.1538		6.76492	99.2781	1.14513	13
	6.85268	102.381	104.938	101.25	105.063	102.41	100	103.571	98.8372		96.1977	94.902	94.5946	95.5645	95		6.85268	99.593	1.10173	13
	6.94045	102.381	103.704	102.5	103.797	104.819	103.896	102.381	103.488		96.9582	93.7255	95.7529	95.9677	95.3846		6.94045	100.366	1.12882	13
	7.02822	101.19	101.235	98.75	103.797	104.819	100	101.19	100		97.3384	94.1176	93.8224	96.7742	93.8462		7.02822	98.9909	1.00783	13
	7.11598	98.8095	103.704	101.25	103.797	102.41	101.299	100	101.163		100.76	95.2941	93.4363	94.3548	93.8462		7.11598	99.2403	1.03776	13
	7.20373	102.381	101.235	98.75	103.797	106.024	100	101.19	100		96.9582	95.2941	94.2085	96.7742	95		7.20373	99.3548	0.999417	13
	7.29148	102.381	102.469	102.5	106.329	103.614	102.597	101.19	103.488		96.9582	95.2941	94.2085	93.1452	92.3077		7.29148	99.7295	1.29501	13
	7.37925	101.19	104.938	103.75	102.532	101.205	101.299	101.19	104.651		96.9582	94.902	94.2085	95.5645	95.3846		7.37925	99.8287	1.07966	13
	7.46703	98.8095	104.938	100	103.797	103.614	101.299	100	102.326		96.5779	94.1176	94.5946	94.3548	93.4615		7.46703	99.0685	1.13017	13
	7.55503	103.571	103.704	101.25	105.063	103.614	103.896	101.19	103.488		96.1977	95.2941	94.5946	96.371	92.6923		7.55503	100.071	1.20849	13
	7.64278	102.381	102.469	101.25	103.797	102.41	102.597	100	101.163		95.8175	94.5098	92.278	95.9677	93.8462		7.64278	99.1144	1.11186	13
	7.73055	103.571	103.704	100	102.532	102.41	103.896	101.19	101.163		99.2395	95.2941	95.7529	96.7742	95		7.73055	100.04	0.922588	13
	7.8183	98.8095	104.938	101.25	101.266	103.614	102.597	103.571	103.488		96.5779	96.0784	94.2085	94.7581	95		7.8183	99.7045	1.09098	13
	7.90607	103.571	103.704	98.75	102.532	103.614	101.299	103.571	103.488		96.9582	95.2941	94.9807	95.9677	95		7.90607	99.9023	1.04956	13
	7.99383	102.381	101.235	103.75	101.266	103.614	102.597	103.571	102.326		98.0989	95.6863	93.8224	95.5645	94.2308		7.99383	99.8572	1.05585	13
	8.08158	104.762	101.235	101.25	101.266	103.614	105.195	101.19	103.488		97.3384	95.2941	93.8224	96.371	94.6154		8.08158	99.9571	1.10516	13
	8.1696	102.381	103.704	100	103.797	103.614	102.597	102.381	102.326		96.1977	97.2549	94.5946	95.1613	95		8.1696	99.9238	1.02609	13
	8.25737	102.381	102.469	100	105.063	100	100	102.381	102.326		98.4791	96.8627	93.0502	94.7581	93.0769		8.25737	99.2959	1.06788	13
	8.34512	101.19	103.704	100	102.532	102.41	101.299	102.381	100		98.0989	94.902	94.5946	94.3548	96.5385		8.34512	99.3849	0.921468	13
	8.43315	102.381	102.469	97.5	103.797	102.41	102.597	101.19	102.326		98.8593	95.6863	94.2085	94.7581	94.6154		8.43315	99.446	1.00559	13
	8.5209	102.381	103.704	102.5	105.063	102.41	102.597	104.762	101.163		97.3384	94.902	93.0502	95.1613	95		8.5209	100.002	1.18116	13
	8.60867	101.19	101.235	102.5	105.063	102.41	100	101.19	98.8372		97.3384	94.5098	95.7529	95.9677	96.5385		8.60867	99.4256	0.886584	13
	8.69642	103.571	102.469	98.75	105.063	101.205	100	103.571	101.163		97.3384	95.2941	94.5946	94.3548	94.6154		8.69642	99.3839	1.06212	13
	8.78418	102.381	104.938	105	102.532	103.614	101.299	100	100		100.38	97.2549	96.9112	95.5645	95		8.78418	100.375	0.934669	13
	8.87195	101.19	102.469	101.25	105.063	101.205	101.299	100	102.326		96.5779	96.0784	94.9807	95.5645	96.1538		8.87195	99.5506	0.903636	13
	8.9597	103.571	104.938	101.25	102.532	103.614	101.299	103.571	98.8372		95.8175	94.1176	93.8224	93.9516	96.1538		8.9597	99.4982	1.16666	13
	9.04747	101.19	103.704	101.25	101.266	101.205	102.597	102.381	101.163		96.9582	94.5098	95.3668	95.1613	96.1538		9.04747	99.4543	0.908348	13
	9.13522	102.381	103.704	100	103.797	102.41	101.299	100	101.163		98.0989	95.2941	94.2085	94.3548	94.6154		9.13522	99.3327	1.00329	13
	9.22298	101.19	101.235	102.5	102.532	98.7952	101.299	102.381	101.163		97.3384	94.5098	93.0502	94.3548	94.2308		9.22298	98.8137	1.00685	13
	9.31073	100	101.235	101.25	106.329	104.819	97.4026	100	100		97.7186	96.4706	93.8224	94.3548	96.1538		9.31073	99.1966	1.03531	13
	9.3985	103.571	101.235	101.25	102.532	100	100	104.762	103.488		97.3384	93.7255	93.0502	95.5645	94.2308		9.3985	99.2883	1.12723	13
	9.48627	102.381	102.469	101.25	103.797	102.41	100	100	98.8372		97.3384	93.7255	93.4363	95.9677	94.2308		9.48627	98.911	1.0082	13
	9.57402	102.381	98.7654	102.5	103.797	102.41	102.597	103.571	101.163		96.5779	94.902	93.8224	94.7581	92.6923		9.57402	99.226	1.14208	13
	9.66178	100	106.173	101.25	103.797	98.7952	101.299	102.381	100		96.1977	95.2941	91.8919	96.371	94.2308		9.66178	99.0524	1.13233	13
	9.74953	102.381	103.704	105	103.797	104.819	102.597	98.8095	100		96.9582	94.1176	93.0502	95.9677	95		9.74953	99.7079	1.19427	13
	9.83728	101.19	102.469	100	105.063	103.614	103.896	100	100		96.1977	94.902	93.8224	96.371	93.4615		9.83728	99.3068	1.10268	13
	9.92505	102.381	102.469	101.25	103.797	101.205	102.597	102.381	102.326		95.057	96.8627	93.0502	94.7581	93.0769		9.92505	99.3239	1.12963	13
	10.0128	102.381	103.704	101.25	103.797	100	105.195	98.8095	100		96.5779	94.1176	96.139	94.7581	94.2308		10.0128	99.3046	1.07259	13
	10.1006	101.19	103.704	101.25	105.063	103.614	101.299	102.381	101.163		95.4373	94.5098	93.0502	94.7581	95.7692		10.1006	99.4761	1.14684	13
	10.1886	102.381	104.938	102.5	106.329	106.024	105.195	101.19	100		97.3384	95.6863	93.4363	95.1613	93.8462		10.1886	100.31	1.31526	13
	10.2764	103.571	104.938	101.25	100	101.205	98.7013	98.8095	98.8372		95.8175	94.902	92.6641	95.1613	93.0769		10.2764	98.3796	1.07153	13
	10.3641	102.381	103.704	101.25	102.532	103.614	101.299	102.381	101.163		97.3384	96.4706	92.278	95.5645	93.0769		10.3641	99.4655	1.10995	13
	10.4519	104.762	106.173	102.5	102.532	102.41	100	102.381	103.488		98.4791	96.0784	93.0502	94.7581	94.6154		10.4519	100.094	1.186	13
	10.5396	102.381	104.938	100	102.532	101.205	101.299	103.571	100		95.8175	96.8627	95.3668	96.371	95		10.5396	99.6418	0.939389	13
	10.6274	103.571	102.469	100	103.797	102.41	102.597	103.571	101.163		96.1977	93.7255	94.2085	95.5645	95		10.6274	99.5596	1.10202	13
	10.7151	98.8095	102.469	103.75	102.532	103.614	103.896	102.381	101.163		96.5779	94.1176	95.7529	94.3548	94.6154		10.7151	99.541	1.09112	13
	10.8029	102.381	101.235	101.25	106.329	102.41	101.299	102.381	101.163		96.5779	95.6863	93.8224	94.3548	94.6154		10.8029	99.5003	1.10193	13
	10.8907	102.381	103.704	102.5	105.063	103.614	102.597	101.19	101.163		97.3384	95.6863	94.9807	95.9677	93.0769		10.8907	99.9433	1.10037	13
	10.9784	102.381	103.704	100	105.063	104.819	102.597	100	100		97.7186	95.6863	93.4363	93.5484	94.6154		10.9784	99.5054	1.15838	13
	11.0662	103.571	103.704	103.75	103.797	102.41	100	102.381	101.163		95.4373	95.6863	92.278	94.7581	94.6154		11.0662	99.5039	1.18785	13
	11.1539	102.381	103.704	101.25	106.329	102.41	105.195	101.19	100		97.3384	94.1176	94.5946	93.1452	95.3846		11.154	99.7722	1.22406	13
	11.2417	102.381	104.938	102.5	103.797	104.819	100	100	100		96.9582	95.2941	93.8224	95.5645	94.2308		11.2417	99.562	1.1151	13
	11.3295	104.762	100	105	102.532	101.205	97.4026	100	98.8372		96.1977	97.2549	96.5251	96.371	93.8462		11.3294	99.2256	0.950528	13
	15.0078	192.857	214.815	208.75	212.658	210.843	236.364	265.476	263.953		320.532	298.431	274.517	291.935	276.923		15.0078	251.389	11.3602	13
	15.0953	200	218.519	212.5	213.924	212.048	237.662	267.857	262.791		322.433	299.608	277.606	291.532	272.308		15.0953	252.984	10.9925	13
	15.1831	195.238	217.284	212.5	215.19	213.253	235.065	269.048	259.302		321.293	296.863	277.992	293.145	272.692		15.1831	252.22	11.0606	13
	15.2711	195.238	219.753	208.75	213.924	216.867	237.662	261.905	260.465		319.392	300	274.131	288.71	275.769		15.2711	251.736	10.8719	13
	15.3591	196.429	213.58	211.25	213.924	212.048	240.26	266.667	262.791		320.913	294.902	282.239	291.532	273.846		15.3591	252.337	11.1179	13
	15.4469	198.81	213.58	212.5	212.658	216.867	233.766	267.857	263.953		324.335	296.863	274.517	287.903	272.308		15.4469	251.994	10.986	13
	15.5349	201.19	213.58	208.75	213.924	209.639	241.558	263.095	258.14		325.095	300	274.517	289.516	276.923		15.5349	251.994	11.2161	13
	15.6229	196.429	218.519	211.25	211.392	212.048	238.961	263.095	259.302		318.631	294.118	276.062	286.694	271.923		15.6229	250.648	10.6911	13
	15.7107	201.19	222.222	211.25	208.861	215.663	240.26	269.048	262.791		325.475	297.255	274.903	287.5	276.923		15.7107	253.334	10.9441	13
	15.7984	196.429	217.284	215	217.722	213.253	241.558	266.667	262.791		322.433	296.078	275.676	287.097	275.385		15.7985	252.875	10.7454	13
	15.8865	202.381	216.049	213.75	216.456	213.253	242.857	267.857	266.279		317.11	296.471	272.587	287.5	268.077		15.8865	252.356	10.3401	13
RAW DATA		Mg2+									Mg2+
		5 mM									5 mM
		66	63	61	61	63	62	63	63		234	220	228	221	227
		66	66	63	64	62	62	63	64		236	224	226	223	229
		67	66	62	62	64	63	64	62		243	229	235	231	229
		67	65	65	63	64	63	64	64		241	231	235	232	233
		70	64	63	64	65	63	62	65		238	233	230	234	233
		69	66	65	63	64	65	66	65		242	233	234	234	234
		69	66	65	64	66	65	66	65		243	228	232	232	236
		72	66	65	64	65	63	65	64		245	230	233	231	235
		71	63	66	61	65	63	67	63		247	231	235	231	235
		69	67	68	65	66	63	65	65		249	230	237	232	241
		69	66	63	64	67	63	66	65		252	233	237	234	241
		67	67	65	64	65	62	64	64		246	233	238	230	243
		69	66	65	63	63	63	64	64		245	234	244	231	239
		70	67	65	64	66	61	67	64		248	235	240	226	242
		69	69	64	66	66	64	66	64		244	232	237	233	239
		72	65	65	64	65	62	66	65		244	234	238	231	243
		70	68	64	63	67	64	65	67		246	234	236	230	240
		70	67	62	65	64	62	65	65		246	231	234	231	241
		70	69	66	64	67	63	65	66		251	230	239	230	250
		70	67	66	64	67	62	66	65		244	228	238	231	239
		71	67	66	64	67	63	66	64		244	239	236	233	241
		70	67	64	65	67	62	66	65		245	238	239	230	242
		69	68	65	64	66	63	66	66		240	242	237	233	245
		70	65	67	62	64	62	67	66		245	235	235	237	241
		70	67	65	66	66	61	66	66		242	233	237	232	245
		70	66	67	64	66	64	67	63		245	240	238	238	243
		69	68	67	65	65	63	67	66		243	233	240	236	243
		71	68	64	65	66	62	68	66		244	235	243	233	244
		69	68	65	64	66	64	67	64		248	239	241	236	250
		71	66	65	67	65	63	69	65		245	242	241	241	244
		69	66	65	65	68	63	69	66		247	239	243	233	242
		72	69	66	65	69	65	66	65		249	240	241	235	245
		70	68	64	66	67	62	68	67		250	236	241	243	245
		71	69	67	66	68	63	67	68		248	236	242	230	248
		70	67	65	64	67	63	70	65		247	235	237	236	246
		72	68	65	68	67	62	69	66		252	238	240	234	244
		70	68	64	66	68	62	68	66		248	234	239	233	245
		70	68	66	65	67	64	68	67		243	237	240	236	245
		72	68	66	67	68	64	65	69		250	239	239	234	242
		68	66	66	64	68	60	69	66		246	233	239	229	239
		71	70	66	66	69	64	68	68		245	237	243	233	247
		71	68	66	66	67	63	68	66		248	236	240	233	238
		72	67	68	68	69	63	68	67		249	233	240	228	244
		71	68	66	64	69	64	69	68		249	234	238	228	243
		72	69	65	64	67	62	69	68		250	233	240	230	240
		72	69	66	66	68	64	68	68		244	235	238	233	242
		69	67	65	66	68	63	66	68		247	236	235	233	247
		73	67	67	65	68	63	68	68		238	230	235	228	242
		73	67	68	65	69	64	68	67		246	230	236	226	243
		71	71	68	68	68	65	68	71		234	223	228	219	229
		71	70	67	67	68	64	72	68		232	228	228	217	231
		71	68	69	69	69	66	70	68		237	227	228	219	227
		73	69	68	68	70	63	68	68		237	221	222	222	225
		71	69	68	68	70	65	69	68		235	226	230	223	226
		71	72	68	67	70	64	69	68		233	226	221	213	228
		72	71	67	68	71	64	70	70		231	222	225	215	224
		72	71	70	70	71	64	68	69		234	221	221	214	227
		72	69	68	69	70	66	70	66		233	224	225	216	228
		72	69	68	66	71	64	69	68		238	221	220	214	229
		71	71	71	68	72	65	69	68		237	221	222	212	222
		69	70	69	67	71	64	69	68		236	220	227	211	222
		71	67	69	66	70	63	70	69		234	220	223	214	221
		72	70	68	68	68	64	69	67		230	221	224	212	225
		72	70	68	68	68	64	68	68		230	221	221	213	222
		72	69	68	68	70	66	72	68		234	217	222	214	221
		72	69	68	70	70	64	69	67		235	223	220	215	226
		72	71	71	70	69	65	70	68		233	218	216	212	221
		74	71	68	68	70	64	71	68		233	222	220	212	224
		73	71	67	68	70	65	70	68		230	220	220	215	220
		84	81	80	79	83	77	84	86		263	255	259	248	260
		84	81	79	78	84	77	82	84		265	252	260	254	259
		85	80	80	80	83	77	84	86		268	253	261	249	256
		84	81	78	80	84	76	81	85		265	250	257	250	261
		85	79	77	81	85	76	83	84		266	251	256	246	257
		84	82	79	78	86	76	84	86		268	251	249	252	255
		85	85	81	79	83	76	83	86		268	252	249	249	259
		86	83	81	80	85	76	86	86		270	247	254	244	255
		83	82	80	83	84	76	83	87		268	250	249	246	254
		86	82	80	80	84	79	84	85		266	256	252	246	253
		86	83	78	80	82	75	83	88		267	251	253	247	250
		84	81	77	81	84	78	84	83		262	251	254	248	254
		84	82	80	82	84	79	85	86		260	250	252	245	254
		85	81	78	81	83	76	82	86		265	249	248	243	254
		84	81	81	80	86	78	83	84		267	253	253	243	254
		86	80	76	80	85	77	82	89		265	250	243	241	250
		84	82	78	81	84	77	82	88		262	245	249	236	252
		86	82	81	80	85	78	85	90		262	249	244	237	249
		85	84	80	82	84	76	83	91		270	247	249	238	247
		86	81	80	80	82	76	84	88		257	246	244	243	250
		84	83	81	80	84	77	83	88		265	247	248	240	250
		86	80	79	81	83	76	83	86		264	247	243	243	247
		84	82	77	81	86	80	82	85		260	246	249	237	252
		84	85	82	80	85	75	85	85		260	252	246	242	250
		87	82	81	81	86	78	85	87		263	245	250	243	249
		86	82	81	82	85	75	84	86		265	248	244	241	252
		86	82	79	78	83	78	84	87		266	243	249	238	248
		86	84	82	80	85	77	83	86		259	244	248	237	246
		84	84	78	80	86	78	83	89		262	240	248	236	250
		87	81	81	82	84	77	83	85		265	243	246	237	250
		86	81	79	80	82	77	84	89		259	247	245	237	247
		86	84	79	79	84	80	86	88		263	247	243	236	251
		88	79	80	83	85	79	85	87		266	246	246	240	253
		87	84	81	81	84	78	81	88		260	246	252	239	251
		87	82	80	79	83	77	82	90		261	247	247	239	249
		87	81	78	83	85	78	86	86		266	244	244	241	249
		84	83	80	83	83	78	85	89		259	247	245	237	251
		85	85	82	80	85	79	85	89		258	248	246	236	251
		88	83	82	82	87	77	85	85		263	244	243	237	256
		84	81	79	79	85	76	83	88		260	250	249	238	252
		86	80	80	80	81	79	83	89		262	244	244	245	252
		88	83	80	80	88	78	86	86		261	246	246	236	248
		86	83	78	82	85	77	86	88		258	247	250	239	248
		85	83	82	80	87	79	86	87		262	246	243	244	254
		88	81	83	82	87	79	87	88		255	246	244	243	252
		83	85	80	79	84	77	86	84		257	240	244	239	251
		89	81	80	79	85	79	83	87		260	241	245	240	247
		83	83	80	79	84	78	86	86		258	243	249	238	250
		87	81	81	80	86	77	81	88		260	243	248	237	252
		83	84	81	81	83	78	84	89		260	246	246	236	253
		85	84	80	79	83	77	85	89		263	248	247	241	246
		88	84	78	84	85	76	86	88		260	242	246	239	245
		87	85	82	81	84	80	87	88		257	240	243	238	248
		88	83	83	80	83	80	85	86		260	244	244	237	246
		85	81	80	78	87	78	86	87		262	246	243	238	245
		86	82	82	80	86	78	86	87		254	240	250	241	243
		85	83	83	82	84	78	85	90		258	244	245	237	247
		84	82	80	81	85	78	85	90		261	244	243	239	245
		85	83	80	83	88	78	88	89		260	246	252	238	242
		86	83	80	81	87	78	86	89		260	243	244	236	243
		83	83	83	80	85	77	82	89		264	246	243	242	245
		87	84	79	80	82	77	85	88		258	245	242	236	247
		87	82	81	81	87	79	87	88		258	246	247	235	247
		86	82	79	80	86	78	87	90		256	244	251	239	245
		88	84	83	79	84	77	82	88		258	245	247	239	239
		84	87	80	84	86	78	84	86		261	240	245	242	245
		86	84	78	84	88	79	88	87		256	243	246	239	248
		86	80	82	80	85	77	87	87		249	241	250	237	247
		87	84	80	81	86	78	87	87		256	243	244	234	244
		87	85	80	83	88	79	85	90		254	241	242	242	245
		89	84	81	84	84	77	88	89		262	243	250	239	251
		88	84	79	82	86	80	85	87		255	239	245	239	242
		88	83	80	81	89	75	85	87		256	242	246	238	249
		87	83	79	81	84	78	86	87		260	243	244	241	247
		85	84	82	82	86	77	85	90		259	247	240	241	247
		89	84	80	81	85	78	83	88		260	236	250	237	246
		88	84	82	83	88	77	86	88		259	244	241	238	246
		86	81	80	79	88	78	86	90		251	239	244	234	250
		86	85	81	83	85	77	87	85		253	242	245	237	247
		86	84	82	82	87	80	86	89		255	239	248	238	248
		85	82	79	82	87	77	85	86		256	240	243	240	244
		83	84	81	82	85	78	84	87		265	243	242	234	244
		86	82	79	82	88	77	85	86		255	243	244	240	247
		86	83	82	84	86	79	85	89		255	243	244	231	240
		85	85	83	81	84	78	85	90		255	242	244	237	248
		83	85	80	82	86	78	84	88		254	240	245	234	243
		87	84	81	83	86	80	85	89		253	243	245	239	241
		86	83	81	82	85	79	84	87		252	241	239	238	244
		87	84	80	81	85	80	85	87		261	243	248	240	247
		83	85	81	80	86	79	87	89		254	245	244	235	247
		87	84	79	81	86	78	87	89		255	243	246	238	247
		86	82	83	80	86	79	87	88		258	244	243	237	245
		88	82	81	80	86	81	85	89		256	243	243	239	246
		86	84	80	82	86	79	86	88		253	248	245	236	247
		86	83	80	83	83	77	86	88		259	247	241	235	242
		85	84	80	81	85	78	86	86		258	242	245	234	251
		86	83	78	82	85	79	85	88		260	244	244	235	246
		86	84	82	83	85	79	88	87		256	242	241	236	247
		85	82	82	83	85	77	85	85		256	241	248	238	251
		87	83	79	83	84	77	87	87		256	243	245	234	246
		86	85	84	81	86	78	84	86		264	248	251	237	247
		85	83	81	83	84	78	84	88		254	245	246	237	250
		87	85	81	81	86	78	87	85		252	240	243	233	250
		85	84	81	80	84	79	86	87		255	241	247	236	250
		86	84	80	82	85	78	84	87		258	243	244	234	246
		85	82	82	81	82	78	86	87		256	241	241	234	245
		84	82	81	84	87	75	84	86		257	246	243	234	250
		87	82	81	81	83	77	88	89		256	239	241	237	245
		86	83	81	82	85	77	84	85		256	239	242	238	245
		86	80	82	82	85	79	87	87		254	242	243	235	241
		84	86	81	82	82	78	86	86		253	243	238	239	245
		86	84	84	82	87	79	83	86		255	240	241	238	247
		85	83	80	83	86	80	84	86		253	242	243	239	243
		86	83	81	82	84	79	86	88		250	247	241	235	242
		86	84	81	82	83	81	83	86		254	240	249	235	245
		85	84	81	83	86	78	86	87		251	241	241	235	249
		86	85	82	84	88	81	85	86		256	244	242	236	244
		87	85	81	79	84	76	83	85		252	242	240	236	242
		86	84	81	81	86	78	86	87		256	246	239	237	242
		88	86	82	81	85	77	86	89		259	245	241	235	246
		86	85	80	81	84	78	87	86		252	247	247	239	247
		87	83	80	82	85	79	87	87		253	239	244	237	247
		83	83	83	81	86	80	86	87		254	240	248	234	246
		86	82	81	84	85	78	86	87		254	244	243	234	246
		86	84	82	83	86	79	85	87		256	244	246	238	242
		86	84	80	83	87	79	84	86		257	244	242	232	246
		87	84	83	82	85	77	86	87		251	244	239	235	246
		86	84	81	84	85	81	85	86		256	240	245	231	248
		86	85	82	82	87	77	84	86		255	243	243	237	245
		88	81	84	81	84	75	84	85		253	248	250	239	244
		162	174	167	168	175	182	223	227		843	761	711	724	720
		168	177	170	169	176	183	225	226		848	764	719	723	708
		164	176	170	170	177	181	226	223		845	757	720	727	709
		164	178	167	169	180	183	220	224		840	765	710	716	717
		165	173	169	169	176	185	224	226		844	752	731	723	712
		167	173	170	168	180	180	225	227		853	757	711	714	708
		169	173	167	169	174	186	221	222		855	765	711	718	720
		165	177	169	167	176	184	221	223		838	750	715	711	707
		169	180	169	165	179	185	226	226		856	758	712	713	720
		165	176	172	172	177	186	224	226		848	755	714	712	716
		170	175	171	171	177	187	225	229		834	756	706	713	697
