# Supplementary material for: Structural and functional properties of a magnesium transporter of the SLC11/NRAMP family
Source: eLife journal article supplement (doi:10.7554/elife.74589), 2022-01-10
Supplement: supp [file Figure3.xlsx]

## Sheet: Fig3A
ElenWT
Lipid to protein ratio 50
Manganese titration
NORMALIZED DATA																															Concentrations
		Concentrations Mn (uM)																													Mean	SEM	N
	Time norm (min)	0	1	5	10	25	50	200	400		0	1	5	10	25	50	200	400		0	1	5	10	25	50	200	400			Time (min)	0 μM Mn2+			1 μM Mn2+			5 μM Mn2+			10 μM Mn2+			25 μM Mn2+			50 μM Mn2+			200 μM Mn2+
	-7.47817	119.385	122.453	136.325	140.063	144.476	146.369	158.295	181.225		121.63	127.133	140.284	138.868	143.377	153.145	174.436	193.581		116.285	128.458	139.561	141.492	148.035	155.144	175.351	189.539			-7.47817	119.1	1.54936	3	126.015	1.82145	3	138.723	1.21718	3	140.141	0.758487	3	145.296	1.40585	3	151.553	2.65514	3	169.361
	-7.40892	115.011	118.392	134.477	138.893	141.662	146.075	158.006	178.515		116.923	125.007	136.562	131.754	142.186	149.966	170.855	188.777		112.558	125.778	138.121	139.858	145.958	152.398	171.771	180.964			-7.40892	114.831	1.26338	3	123.059	2.34416	3	136.387	1.05575	3	136.835	2.55571	3	143.269	1.35346	3	149.48	1.84145	3	166.877
	-7.33973	114.205	117.876	132.422	138.008	141.03	144.047	152.85	175.963		112.894	120.1	134.991	131.582	140.311	147.662	173.583	188.615		111.555	123.819	134.379	136.868	142.62	150.017	171.661	178.03			-7.33973	112.885	0.764831	3	120.598	1.73383	3	133.93	0.774811	3	135.486	1.97951	3	141.32	0.682074	3	147.242	1.73599	3	166.031
	-7.27057	112.604	117.55	131.357	136.628	137.568	140.548	151.914	174.855		111.956	120.029	134.518	128.69	138.691	145.375	169.206	183.246		110.861	123.833	133.879	135.928	140.272	147.304	167.897	176.505			-7.27057	111.807	0.50857	3	120.47	1.82736	3	133.251	0.964875	3	133.749	2.53748	3	138.844	0.784254	3	144.409	2.00918	3	163.006
	-7.20142	110.713	115.716	129.14	135.758	136.078	139.573	150.094	172.145		111.291	116.591	130.72	129.55	138.501	146.098	168.543	182.075		110.36	122.778	132.924	133.724	140.048	148.048	166.587	172.713			-7.20142	110.788	0.271275	3	118.361	2.22259	3	130.928	1.09746	3	133.011	1.82737	3	138.209	1.15535	3	144.573	2.56278	3	161.741
	-7.13225	110.524	114.819	127.735	130.988	135.882	138.241	147.626	170.825		109.322	115.335	131.04	129.518	136.039	142.953	165.208	180.844		108.843	121.639	131.394	131.736	139.505	145.534	162.786	172.58			-7.13225	109.563	0.500048	3	117.264	2.19228	3	130.056	1.16515	3	130.747	0.65127	3	137.142	1.18233	3	142.243	2.13506	3	158.54
	-7.06335	108.067	112.755	125.902	130.913	133.609	134.417	146.027	167.042		109.752	114.165	128.752	129.612	134.975	142.112	165.984	177.453		109.113	120.861	128.742	129.624	137.572	144.972	164.207	170.427			-7.06335	108.977	0.491363	3	115.927	2.50039	3	127.799	0.948521	3	130.05	0.431813	3	135.385	1.16219	3	140.5	3.15169	3	158.739
	-6.99392	106.315	111.179	124.009	128.214	131.066	133.38	143.934	165.634		109.413	113.495	127.776	126.61	132.91	139.657	162.005	176.928		105.925	119.5	129.576	130.826	134.904	143.351	161.476	171.17			-6.99392	107.218	1.1035	3	114.725	2.4795	3	127.12	1.63995	3	128.55	1.22854	3	132.96	1.10839	3	138.796	2.91045	3	155.805
	-6.92475	105.558	111.913	121.866	127.944	130.614	133.163	143.389	165.318		106.545	113.766	126.113	125.36	131.036	137.185	158.48	174.304		107.121	118.181	129.015	129.67	133.626	141.499	159.76	169.665			-6.92475	106.408	0.456193	3	114.62	1.85911	3	125.665	2.07601	3	127.658	1.25254	3	131.759	0.941677	3	137.282	2.40674	3	153.877
	-6.8556	106.579	109.264	122.102	124.419	128.402	131.15	141.518	163.048		105.385	113.381	123.353	123.749	128.224	137.201	158.272	173.436		106.568	117.403	125.303	129.562	135.383	139.745	156.863	167.473			-6.8556	106.177	0.39638	3	113.349	2.34958	3	123.586	0.931297	3	125.91	1.8363	3	130.67	2.35737	3	136.032	2.5491	3	152.218
	-6.78668	104.979	109.753	121.26	124.899	124.895	129.122	139.238	160.443		107.314	112.068	122.865	123.859	127.827	135.873	155.41	170.105		104.46	116.792	125.47	127.928	132.157	138.455	158.081	169.55			-6.78668	105.584	0.877784	3	112.871	2.07119	3	123.198	1.22673	3	125.562	1.22075	3	128.293	2.10921	3	134.483	2.78234	3	150.91
	-6.71728	103.554	108.028	119.929	124.104	125.677	128.72	139.187	158.895		104.602	114.066	120.348	122.452	127.414	134.998	155.202	168.43		104.692	115.25	124.682	126.248	131.15	135.809	156.402	167.759			-6.71728	104.283	0.365109	3	112.448	2.23632	3	121.653	1.51928	3	124.268	1.09917	3	128.081	1.61464	3	133.176	2.24023	3	150.264
	-6.64812	102.483	108.123	119.397	123.069	124.247	127.636	138.472	157.822		105.085	110.77	122.727	123.906	127.51	133.317	152.606	168.49		103.817	114.278	123.924	124.507	130.447	139.927	156.79	168.636			-6.64812	103.795	0.75113	3	111.057	1.78257	3	122.016	1.35446	3	123.827	0.416968	3	127.401	1.79057	3	133.627	3.55158	3	149.289
	-6.57893	101.185	108.177	118.643	122.784	124.007	127.171	138.183	155.956		104.263	111.098	120.027	123.859	126.302	133.064	152.397	164.958		103.149	112.597	123.152	123.906	130.096	136.355	155.111	168.693			-6.57893	102.866	0.899936	3	110.624	1.29781	3	120.607	1.33344	3	123.516	0.366351	3	126.802	1.77543	3	132.197	2.68621	3	148.564
	-6.51003	103.151	106.71	117.711	121.359	122.035	126.707	138.727	156.326		101.512	110.014	120.348	125.328	124.365	131.769	153.307	165.886		102.596	113.917	121.045	124.337	129.265	135.594	154.428	166.178			-6.51003	102.42	0.481182	3	110.214	2.08275	3	119.702	1.01526	3	123.675	1.19277	3	125.222	2.13073	3	131.357	2.57371	3	148.821
	-6.4406	101.172	106.588	117.12	120.984	123.374	126.119	137.485	154.549		102.438	110.899	119.982	120.31	123.761	131.937	150.786	163.201		102.609	111.194	122.348	123.936	128.834	132.716	152.03	165.396			-6.4406	102.073	0.453203	3	109.56	1.48867	3	119.817	1.51159	3	121.743	1.11371	3	125.323	1.75891	3	130.257	2.0815	3	146.767
	-6.37145	101.16	105.922	117.859	121.599	122.411	126.444	135.937	152.015		102.986	109.144	118.441	120.216	124.222	129.684	150.711	161.042		102.326	112.958	120.727	123.305	127.7	133.096	151.273	167.702			-6.37145	102.157	0.533898	3	109.342	2.03352	3	119.009	0.875298	3	121.706	0.893279	3	124.778	1.55175	3	129.741	1.92066	3	145.973
	-6.30255	101.828	105.651	115.789	119.769	121.087	124.369	136.651	152.666		102.112	109.372	116.809	118.183	122.824	129.684	148.456	160.537		102.224	112.014	120.955	121.748	127.732	132.302	149.28	166.73			-6.30255	102.054	0.117919	3	109.012	1.84573	3	117.851	1.57941	3	119.9	1.03109	3	123.881	1.98966	3	128.785	2.33379	3	144.796
	-6.23312	100.756	105.868	115.553	120.039	120.47	124.772	135.733	152.807		102.934	108.459	118.533	118.574	120.505	129.633	147.717	160.86		100.347	111.389	121.288	120.993	126.837	131.442	150.424	163.167			-6.23312	101.346	0.802706	3	108.572	1.59474	3	118.458	1.65597	3	119.869	0.703342	3	122.604	2.11661	3	128.616	1.99175	3	144.624
	-6.16395	99.0799	105.067	114.119	118.404	120.455	123.595	135.018	149.411		100.587	107.889	116.58	119.137	119.774	129.482	149.233	159.669		99.9871	110.833	120.197	120.792	126.997	130.103	146.863	164.215			-6.16395	99.8846	0.437985	3	107.93	1.66483	3	116.965	1.76513	3	119.444	0.706315	3	122.409	2.30248	3	127.727	2.0735	3	143.705
	-6.0948	99.0673	105.515	115.021	118.809	120.169	123.967	136.362	150.255		103.064	107.86	116.229	119.199	120.855	129.045	147.072	158.579		100.681	110.458	118.788	120.114	126.342	129.706	145.775	162.71			-6.0948	100.937	1.16081	3	107.944	1.42769	3	116.679	1.11052	3	119.374	0.386719	3	122.455	1.95351	3	127.572	1.81292	3	143.07
	-6.02588	98.059	104.876	113.764	118.164	120.184	124.57	135.154	150.097		100.834	106.862	117.038	123.39	120.235	128.523	145.651	160.093		100.72	110.236	118.682	120.376	124.665	129.342	146.347	162.005			-6.02588	99.8711	0.90664	3	107.325	1.56444	3	116.495	1.4454	3	120.643	1.51438	3	121.694	1.48512	3	127.478	1.47311	3	142.384
	-5.95645	99.1051	104.007	114.385	118.134	120.424	123.672	136.277	150.66		100.3	106.847	116.672	121.685	119.663	129.146	147.698	160.012		100.733	110.125	118.833	119.79	123.259	129.441	146.956	160.842			-5.95645	100.046	0.486679	3	106.993	1.76759	3	116.63	1.28428	3	119.87	1.02594	3	121.115	1.09394	3	127.42	1.87557	3	143.643
	-5.8873	96.8868	104.741	113.882	117.744	122.17	122.883	135.716	150.589		100.535	106.405	115.879	121.326	119.806	128.002	145.442	159.003		100.244	109.417	119.106	120.376	123.786	128.382	147.675	161.833			-5.8873	99.2219	1.17053	3	106.854	1.36842	3	116.289	1.52188	3	119.815	1.07129	3	121.921	1.1556	3	126.422	1.7732	3	142.944
	-5.81813	95.7399	105.175	114.459	117.024	121.282	122.805	136.413	150.044		100.274	106.091	115.772	118.168	119.679	127.296	147.622	157.61		99.8458	109.278	118.712	118.681	124.121	126.844	146.55	162.862			-5.81813	98.6198	1.44527	3	106.848	1.2433	3	116.314	1.2574	3	117.957	0.4896	3	121.694	1.29879	3	125.648	1.42748	3	143.528
	-5.74923	94.4416	103.993	113.394	118.404	118.377	123.161	135.596	149.463		99.4003	106.69	115.589	117.058	119.457	127.497	146.788	157.388		99.0231	109.319	117.47	119.374	125.783	127.01	143.579	161.3			-5.74923	97.6217	1.59374	3	106.668	1.5375	3	115.484	1.1776	3	118.279	0.671711	3	121.206	2.30963	3	125.89	1.37127	3	141.988
	-5.6798	98.664	104.265	114.71	116.619	119.762	121.489	134.661	150.202		98.6832	106.79	115.589	116.948	119.504	127.127	144.931	157.59		99.2416	108.986	116.03	119.528	123.626	127.225	144.797	160.804			-5.6798	98.8629	0.189438	3	106.68	1.36394	3	115.443	0.387981	3	117.699	0.91983	3	120.964	1.33305	3	125.281	1.89576	3	141.463
	-5.61063	96.2314	104.184	113.912	117.159	118.964	122.697	136.277	148.742		99.2177	105.178	115.421	116.291	120.092	127.262	143.055	158.942		98.7404	108.319	116.773	119.282	123.115	126.53	143.173	160.652			-5.61063	98.0632	0.926188	3	105.894	1.24635	3	115.369	0.826258	3	117.577	0.888233	3	120.724	1.23909	3	125.496	1.41552	3	140.835
	-5.54148	94.2652	104.279	112.182	116.844	118.498	122.372	135.205	149.551		98.4094	106.277	114.933	115.322	118.726	127.497	146.068	157.973		99.2031	109.167	117.091	118.65	122.891	127.324	146.07	159.146			-5.54148	97.2926	1.53092	3	106.574	1.41885	3	114.735	1.42049	3	116.939	0.961786	3	120.038	1.42797	3	125.731	1.68035	3	142.448
	-5.47257	95.2861	104.523	111.635	115.989	119.883	122.991	135.205	148.038		97.927	105.806	114.75	115.604	118.123	125.866	143.301	157.226		98.2262	107.875	116.712	117.987	123.179	125.686	143.782	159.165			-5.47257	97.1464	0.934167	3	106.068	0.976414	3	114.366	1.47814	3	116.527	0.738689	3	120.395	1.48192	3	124.848	0.929798	3	140.763
	-5.4034	94.3408	102.839	111.266	115.974	118.182	121.753	134.473	146.525		98.0052	106.89	113.713	115.166	118.202	127.144	143.566	157.751		99.0617	107.056	116.591	118.11	122.556	126.298	142.159	160.556			-5.4034	97.1359	1.43044	3	105.595	1.37883	3	113.856	1.53899	3	116.417	0.878391	3	119.647	1.45468	3	125.065	1.67415	3	140.066
	-5.33425	94.0257	104.17	110.97	115.209	119.807	122.062	133.146	146.718		98.4355	105.863	113.926	114.619	117.376	126.219	143.415	156.056		98.1105	107.694	116.045	117.278	122.684	126.513	143.376	159.87			-5.33425	96.8572	1.41887	3	105.909	1.01764	3	113.647	1.47186	3	115.702	0.80632	3	119.956	1.53397	3	124.932	1.43723	3	139.979
	-5.26508	94.5299	103.029	110.364	114.429	117.806	122.093	135.069	148.038		97.3924	106.291	113.606	114.29	117.662	124.79	141.501	156.641		97.9177	107.597	115.818	117.725	121.23	125.455	142.583	158.537			-5.26508	96.6133	1.05272	3	105.639	1.35838	3	113.263	1.58391	3	115.481	1.12247	3	118.899	1.16615	3	124.113	1.02779	3	139.718
	-5.19618	95.9289	103.803	111.842	115.614	118.724	120.622	131.853	147.51		97.1578	105.82	113.392	117.652	119.171	125.765	142.429	157.872		98.1491	107.25	114.364	117.756	121.677	124.677	141.974	159.623			-5.19618	97.0786	0.642135	3	105.625	0.99978	3	113.199	0.734261	3	117.007	0.697183	3	119.857	0.919111	3	123.688	1.56481	3	138.752
	-5.12675	93.5468	103.532	110.171	115.509	117.143	120.204	132.244	145.522		96.7275	105.621	112.569	115.26	117.106	124.353	142.335	155.087		96.7609	106.958	116.197	117.494	121.486	123.801	141.993	159.032			-5.12675	95.6784	1.06586	3	105.37	0.997093	3	112.979	1.75148	3	116.088	0.706835	3	118.578	1.45367	3	122.786	1.30055	3	138.857
	-5.0576	94.2652	103.926	110.719	113.139	118.046	120.468	132.738	144.167		97.8096	107.061	112.645	113.493	118.393	124.622	141.16	156.076		97.6735	106	114.348	116.846	120.176	123.454	140.886	157.45			-5.0576	96.5828	1.15946	3	105.662	0.920812	3	112.571	1.04855	3	114.493	1.18123	3	118.872	0.659681	3	122.848	1.23684	3	138.261
	-4.9887	94.9206	102.363	110.881	114.054	117.7	121.629	131.496	143.832		96.219	105.007	112.325	112.883	117.551	124.992	142.088	155.006		97.5707	106.347	114.53	116.43	120.831	123.42	141.993	159.051			-4.9887	96.2368	0.765069	3	104.573	1.17034	3	112.579	1.06107	3	114.456	1.04349	3	118.694	1.06927	3	123.347	0.971481	3	138.526
	-4.91925	95.9541	102.051	110.024	113.904	115.427	119.121	131.462	145.029		97.0404	105.977	111.562	113.352	116.518	123.545	139.814	154.542		96.7352	107.014	114.515	115.166	119.537	123.454	139.188	159.642			-4.91925	96.5766	0.323463	3	105.014	1.51141	3	112.034	1.31786	3	114.141	0.536973	3	117.161	1.22895	3	122.04	1.45982	3	136.821
	-4.85012	93.7232	102.526	109.255	112.359	115.849	118.997	130.492	143.832		97.0795	105.093	110.83	112.242	116.074	125.126	139.587	154.239		97.1465	106.597	114.182	114.75	120.543	123.867	140.406	158.384			-4.85012	95.9831	1.1301	3	104.739	1.18836	3	111.422	1.45279	3	113.117	0.817236	3	117.489	1.52864	3	122.663	1.86897	3	136.828
	-4.7812	93.7484	101.942	109.27	112.074	117.083	118.873	130.237	144.237		97.1969	105.449	111.394	112.914	116.296	124.538	141.558	154.34		98.162	105.75	112.091	114.781	120.096	124.032	139.926	159.089			-4.7812	96.3691	1.33962	3	104.381	1.22218	3	110.918	0.848455	3	113.257	0.799882	3	117.825	1.15791	3	122.481	1.8099	3	137.24
	-4.71203	93.572	101.684	109.107	114.459	115.698	117.727	131.257	141.316		96.2712	105.264	110.464	113.727	116.169	123.209	140.838	155.692		96.1183	105.347	113.818	115.644	120.08	121.717	139.742	159.337			-4.71203	95.3205	0.875364	3	104.098	1.20732	3	111.13	1.40017	3	114.61	0.558517	3	117.316	1.38873	3	120.884	1.63626	3	137.279
	-4.6426	96.055	102.282	108.604	111.669	115.939	119.353	131.479	142.354		96.897	104.508	112.004	112.242	115.518	122.772	138.564	152.826		96.3496	104.917	113.258	114.442	120.351	121.899	138.21	157.222			-4.6426	96.4339	0.246701	3	103.902	0.818638	3	111.289	1.39009	3	112.784	0.84509	3	117.269	1.54576	3	121.341	1.02556	3	136.084
	-4.57318	92.8031	102.282	109.58	111.264	115.232	118.408	130.015	142.742		96.193	104.337	111.013	112.289	116.391	122.048	139.341	151.918		96.9666	104.764	111.5	114.134	118.61	121.816	139.096	155.64			-4.57318	95.3209	1.27854	3	103.794	0.766091	3	110.698	0.576195	3	112.562	0.839534	3	116.744	0.991109	3	120.758	1.17653	3	136.151
	-4.50403	96.3196	101.711	108.9	111.759	115.638	117.681	130.134	141.475		95.9322	103.552	112.172	112.649	116.407	121.544	140.212	153.048		96.838	106.097	112.53	113.826	119.201	121.651	138.358	157.298			-4.50403	96.3633	0.262406	3	103.787	1.27148	3	111.201	1.155	3	112.744	0.598359	3	117.082	1.08254	3	120.292	1.30586	3	136.235
	-4.43512	95.2357	101.467	108.323	110.079	115.292	117.712	129.947	141.879		97.3012	104.009	110.57	112.179	116.105	122.301	138.526	152.342		95.3599	105.444	112.348	114.581	117.7	120.576	137.491	158.213			-4.43512	95.9656	0.668754	3	103.64	1.16287	3	110.414	1.16454	3	112.28	1.30038	3	116.366	0.707118	3	120.196	1.33826	3	135.321
	-4.36568	95.0844	101.195	107.111	111.984	113.727	116.535	129.488	140.683		96.3625	104.137	111.318	112.633	116.217	122.099	139.075	151.191		96.2082	105.444	111.97	113.209	118.866	121.022	137.804	156.65			-4.36568	95.885	0.402765	3	103.592	1.25648	3	110.133	1.52254	3	112.609	0.353717	3	116.27	1.48377	3	119.885	1.70374	3	135.456
	-4.29652	93.4963	100.652	107.821	110.154	114.57	117.99	128.926	142.143		94.8892	105.207	111.547	113.68	115.152	121.763	138.601	151.736		97.108	105.306	112.318	112.67	118.131	121.535	137.878	155.831			-4.29652	95.1645	1.05164	3	103.721	1.535	3	110.562	1.38853	3	112.168	1.04826	3	115.951	1.10292	3	120.429	1.2212	3	135.135
	-4.22762	92.8661	101.318	106.963	110.349	114.735	117.031	128.756	140.419		95.5932	103.581	110.342	111.695	115.359	121.914	137.313	150.989		96.1697	104.083	111.652	113.764	118.307	119.649	138.155	155.907			-4.22762	94.8763	1.01878	3	102.994	0.850587	3	109.652	1.39659	3	111.936	0.993007	3	116.134	1.10138	3	119.531	1.41095	3	134.741
	-4.1582	94.1265	101.752	107.126	110.034	114.269	116.52	128.569	140.014		95.0717	103.923	109.503	112.148	115.105	121.393	138.279	151.211		96.6838	106.069	111.167	113.009	118.099	120.609	138.026	155.812			-4.1582	95.294	0.746539	3	103.915	1.24627	3	109.265	1.17248	3	111.73	0.883594	3	115.824	1.16279	3	119.507	1.51071	3	134.958
	-4.08903	93.093	99.9457	107.658	109.165	113.591	116.705	127.599	139.785		94.3546	103.295	109.213	111.914	114.867	120.804	137.54	151.877		96.581	104.444	111.545	113.209	117.748	120.046	135.683	156.784			-4.08903	94.6762	1.01964	3	102.562	1.34947	3	109.472	1.12963	3	111.429	1.19243	3	115.402	1.22933	3	119.185	1.25904	3	133.607
	-4.01987	92.9544	102.228	107.096	109.495	113.17	115.869	128.756	139.838		95.2412	103.338	109.838	111.476	114.914	122.149	137.9	152.342		96.0797	105.014	111.576	111.806	116.597	120.427	135.775	155.45			-4.01987	94.7584	0.933937	3	103.527	0.809808	3	109.504	1.30388	3	110.926	0.721882	3	114.894	0.989515	3	119.482	1.87343	3	134.144
	-3.95097	92.1603	100.258	106.978	109.3	113.847	117.278	127.378	138.976		96.2973	103.481	109.976	111.617	114.692	120.367	138.412	150.646		97.3779	103.958	110.924	111.791	116.518	120.228	136.347	155.964			-3.95097	95.2785	1.58999	3	102.566	1.16201	3	109.293	1.18922	3	110.902	0.803013	3	115.019	0.788051	3	119.291	1.00721	3	134.046
	-3.88153	94.3534	98.9133	105.648	109.405	113.621	114.631	127.514	140.683		95.7627	102.939	109.64	112.539	115.168	120.501	137.313	150.787		94.6401	103.931	111.818	113.779	116.374	118.955	136.052	154.383			-3.88153	94.9187	0.430022	3	101.928	1.53406	3	109.035	1.80681	3	111.908	1.30177	3	115.055	0.796617	3	118.029	1.75676	3	133.626
	-3.81237	92.6771	99.2258	106.919	109.255	112.116	115.622	127.548	139.117		95.8409	102.482	108.725	112.242	114.47	121.561	136.612	148.526		96.144	104.597	110.545	111.976	116.981	119.864	136.513	155.335			-3.81237	94.8873	1.10858	3	102.102	1.56223	3	108.73	1.04688	3	111.157	0.954593	3	114.522	1.40454	3	119.016	1.76622	3	133.558
	-3.7432	92.6393	100	107.052	109.72	112.191	115.9	127.684	138.536		95.3977	102.767	110.357	113.415	115.978	120.468	136.479	150.606		95.7969	105.806	111.197	112.546	118.211	119.203	135.756	156.46			-3.7432	94.6113	0.992719	3	102.858	1.67654	3	109.535	1.26511	3	111.893	1.1155	3	115.46	1.75686	3	118.524	1.36148	3	133.307
	-3.6743	94.6055	100.407	107.318	108.91	112.673	114.522	126.85	137.973		94.6415	102.083	108.984	111.538	115.82	121.241	137.446	151.312		95.8483	104.847	109.697	112.623	117.204	119.666	134.908	153.639			-3.6743	95.0318	0.408415	3	102.446	1.29443	3	108.666	0.70483	3	111.024	1.10251	3	115.232	1.34065	3	118.477	2.02868	3	133.068
	-3.60488	93.5216	98.8998	107.363	109.495	111.589	116.071	126.323	137.375		95.8931	103.623	108.694	111.101	113.659	120.316	138.033	149.859		95.2956	103.736	111.258	110.928	116.278	119.418	134.668	154.992			-3.60488	94.9034	0.712138	3	102.086	1.59366	3	109.105	1.143	3	110.508	0.50905	3	113.842	1.35656	3	118.602	1.29177	3	133.008
	-3.53572	92.2359	99.6876	106.298	108.265	111.845	114.987	127.497	138.483		94.9413	101.655	110.189	113.039	113.167	119.643	137.749	150.585		95.1285	104.903	110.591	112.87	116.342	120.063	135.24	154.973			-3.53572	94.1019	0.934557	3	102.082	1.52056	3	109.026	1.36892	3	111.391	1.56412	3	113.785	1.33429	3	118.231	1.62665	3	133.495
	-3.46682	92.5258	98.6145	105.707	107.245	111.243	116.458	126.697	137.797		94.4589	102.725	109.487	111.21	114.025	119.61	136.46	152.543		94.9486	104.347	109.364	111.668	116.534	119.236	134.723	152.973			-3.46682	93.9778	0.739607	3	101.895	1.70603	3	108.186	1.24013	3	110.041	1.40433	3	113.934	1.52786	3	118.434	0.994259	3	132.627
	-2.4011	115.2	123.839	135.438	139.538	140.593	144.248	161.868	175.875		91.8774	100.057	109.991	111.257	114.946	119.812	136.346	148.466		93.3548	102.236	108.652	110.096	116.645	118.756	132.085	147.542			-2.4011	100.144	7.54017	3	108.711	7.59011	3	118.027	8.71406	3	120.297	9.62641	3	124.061	8.28031	3	127.605	8.32704	3	143.433
	-2.33218	115.15	123.037	136.014	139.853	139.991	146.679	160.694	173.183		91.6558	100.742	108.313	109.396	115.01	119.391	135.209	146.064		91.8509	100.847	108.803	109.032	115.799	117.698	132.103	147.637			-2.33218	99.5522	7.79909	3	108.209	7.4143	3	117.71	9.15316	3	119.427	10.2134	3	123.6	8.1988	3	127.923	9.39095	3	142.669
	-2.26302	116.146	124.042	134.935	137.768	139.013	145.533	160.252	173.57		91.4342	98.9872	109.426	110.522	116.137	119.576	136.915	147.235		91.6838	102.139	108.106	108.57	116.262	116.325	133.284	147.637			-2.26302	99.7546	8.19589	3	108.389	7.87916	3	117.489	8.73119	3	118.953	9.42425	3	123.804	7.60442	3	127.145	9.24208	3	143.484
	-2.1936	114.633	122.032	133.471	137.858	138.064	143.97	159.197	172.602		91.8514	99.6719	110.433	111.132	113.977	118.752	136.195	146.367		91.0154	101	108.136	108.97	114.856	115.614	131.882	148.114			-2.1936	99.1667	7.73703	3	107.568	7.24221	3	117.347	8.08938	3	119.32	9.28995	3	122.299	7.88667	3	126.112	8.9748	3	142.425
	-2.12468	114.306	123.418	133.856	137.408	137.387	143.722	157.904	171.846		92.6076	99.301	108.023	109.256	114.152	119.408	133.637	146.972		90.874	100.764	107.076	107.121	113.195	115.233	130.83	147.18			-2.12468	99.2624	7.5382	3	107.827	7.80645	3	116.318	8.773	3	117.928	9.75941	3	121.578	7.90941	3	126.121	8.88257	3	140.79
	-2.05578	114.923	122.942	133.471	136.928	137.342	144.434	158.601	171.617		92.4641	100.385	107.2	109.334	115.01	119.374	133.561	146.346		91.0925	100.708	107.076	108.169	114.297	115.117	130.332	147.904			-2.05578	99.4933	7.72507	3	108.012	7.4657	3	115.916	8.77796	3	118.144	9.39827	3	122.216	7.5657	3	126.309	9.14567	3	140.831
	-1.98637	113.902	122.725	132.436	136.403	136.574	143.49	156.764	170.526		91.2386	99.1155	107.444	109.084	114.835	117.978	135.664	146.488		91.2468	100.208	108.121	107.522	113.147	114.621	133.229	147.675			-1.98637	98.7959	7.55317	3	107.35	7.69409	3	116	8.22033	3	117.67	9.37768	3	121.519	7.54358	3	125.363	9.11495	3	141.886
	-1.91718	115.238	122.399	131.801	135.458	136.695	142.05	159.724	171.177		90.9257	99.2011	107.566	108.474	113.834	117.81	132.992	146.891		90.7198	100.083	107.364	107.676	112.476	115.581	130.314	146.723			-1.91718	98.9612	8.13871	3	107.228	7.5898	3	115.577	8.11224	3	117.203	9.13069	3	121.002	7.85636	3	125.147	8.47598	3	141.01
	-1.84828	113.411	122.331	132.407	136.028	136.966	144.326	159.35	169.91		91.1604	99.6719	106.574	108.662	113.389	117.003	133.94	145.377		90.6555	99.9444	107.121	108.708	113.227	114.522	131.125	146.361			-1.84828	98.4088	7.5023	3	107.316	7.50799	3	115.367	8.52121	3	117.799	9.11439	3	121.194	7.88599	3	125.284	9.54797	3	141.472
	-1.77887	116.272	122.698	132.229	135.713	137.011	144.465	158.908	170.509		91.4733	99.6434	106.635	107.677	113.596	117.995	133.106	144.449		90.3085	99.7361	106.667	107.182	112.492	114.489	130.203	146.418			-1.77887	99.3512	8.46695	3	107.359	7.66933	3	115.177	8.5262	3	116.857	9.42895	3	121.033	7.9953	3	125.65	9.46196	3	140.739
	-1.7097	114.129	123.336	132.096	135.983	137.553	143.149	157.734	170.051		90.6128	98.5449	105.811	108.193	112.659	117.625	132.5	145.7		90.2828	99.6944	106.303	106.797	112.46	114.489	129.834	146.075			-1.7097	98.3416	7.89435	3	107.192	8.07892	3	114.737	8.68088	3	116.991	9.50464	3	120.891	8.33128	3	125.088	9.07594	3	140.022
	-1.64053	114.621	122.236	133.368	135.473	137.538	142.7	155.334	170.772		91.6558	100.713	106.025	108.021	112.5	115.624	131.855	144.974		91.054	99.0833	106.273	106.366	111.773	113.761	129.705	145.617			-1.64053	99.1101	7.75718	3	107.344	7.46068	3	115.222	9.07327	3	116.62	9.4388	3	120.604	8.4696	3	124.028	9.35132	3	138.965
	-1.57138	113.499	122.507	133.826	134.513	137.282	141.694	157.836	167.975		91.1734	99.4151	105.811	107.27	111.801	116.801	131.95	145.135		89.3959	99.8056	105.955	106.936	112.093	113.149	129.557	145.312			-1.57138	98.0227	7.75508	3	107.243	7.63322	3	115.197	9.31446	3	116.24	9.13726	3	120.392	8.44539	3	123.881	8.96838	3	139.781
	-1.50195	113.953	122.385	133.944	134.348	136.635	143.939	157.785	170.262		92.06	98.873	105.201	106.692	112.992	117.457	131.211	144.772		91.2082	99.3472	106.061	106.242	112.636	112.934	129.188	146.951			-1.50195	99.0736	7.44356	3	106.868	7.75956	3	115.069	9.44108	3	115.761	9.29467	3	120.754	7.94083	3	124.777	9.66957	3	139.395
	-1.43278	111.986	121.108	132.998	136.433	136.68	141.214	158.074	171.124		90.4954	97.8887	104.484	106.457	111.213	116.515	130.586	144.126		90.3728	98.5139	105.955	105.888	111.262	113.48	129.428	144.646			-1.43278	97.6182	7.18419	3	105.837	7.63783	3	114.479	9.2693	3	116.259	10.0882	3	119.718	8.48066	3	123.736	8.78254	3	139.362
	-1.36362	111.747	121.91	133.383	134.363	135.476	142.267	156.287	169.611		90	99.03	104.759	105.926	111.023	115.338	131.742	145.034		90.7326	100.194	104.545	105.61	111.629	111.644	127.897	144.322			-1.36362	97.4932	7.13	3	107.045	7.44014	3	114.229	9.57698	3	115.3	9.5322	3	119.376	8.05172	3	123.083	9.65094	3	138.642
	-1.29472	113.146	122.154	132.54	135.038	136.394	141.198	157.563	168.01		90.1304	99.5578	105.308	105.879	110.53	115.002	130.813	144.065		89.2159	99.1806	105.742	105.687	111.965	113.116	128.395	143.845			-1.29472	97.4974	7.82873	3	106.964	7.59583	3	114.53	9.00576	3	115.535	9.75187	3	119.63	8.39222	3	123.105	9.06283	3	138.924
	-1.2253	111.255	123.227	132.762	134.018	135.22	140.734	157.461	168.186		88.9309	98.816	104.012	107.567	111.213	116.448	130.984	142.915		90.9126	99.0417	105.742	105.78	112.268	113.149	129.004	143.731			-1.2253	97.033	7.13419	3	107.028	8.09979	3	114.172	9.30832	3	115.788	9.12951	3	119.567	7.83217	3	123.444	8.69739	3	139.149
	-1.15613	111.81	120.837	131.993	134.618	136.033	142.05	156.134	169.47		90.7823	99.6291	105.018	106.332	110.816	114.834	131.116	142.43		90.1671	100.014	105.636	104.424	110.911	114.191	127.823	146.742			-1.15613	97.5864	7.11396	3	106.827	7.00595	3	114.216	8.89031	3	115.125	9.76238	3	119.253	8.38973	3	123.692	9.18106	3	138.358
	-1.08722	112.251	121.353	131.062	133.868	136.183	140.022	155.147	168.415		90.1173	98.7874	103.89	106.942	111.023	115.136	130.358	143.016		89.3702	99.3889	104.803	105.102	111.47	112.851	127.952	145.979			-1.08722	97.2462	7.50555	3	106.51	7.42361	3	113.251	8.90897	3	115.304	9.29737	3	119.558	8.31325	3	122.67	8.70098	3	137.819
	0	100	100	100	100	100	100	100	100		100	100	100	100	100	100	100	100		100	100	100	100	100	100	100	100			0	100	0	3	100	0	3	100	0	3	100	0	3	100	0	3	100	0	3	100
	0.0689167	101.676	98.4108	99.8669	98.6351	97.9229	97.6157	98.1793	96.5335		102.608	101.241	97.9408	98.4834	100.937	98.52	98.484	97.4566		99.3445	99.3194	99.1515	97.5493	99.345	96.262	99.3911	94.5694			0.068917	101.209	0.970474	3	99.6571	0.834309	3	98.9864	0.562117	3	98.2226	0.339477	3	99.4017	0.870574	3	97.4659	0.656125	3	98.6848
	0.138333	100.529	98.8047	99.113	97.0451	97.1553	95.6185	94.9464	91.8001		101.525	99.7147	97.6815	97.3421	99.317	96.6532	96.4374	93.8232		99.4987	98.25	98.6515	97.7651	97.3802	96.047	96.5129	91.4825			0.138333	100.518	0.585084	3	98.9231	0.426947	3	98.482	0.421825	3	97.3841	0.208891	3	97.9509	0.686167	3	96.1062	0.300155	3	95.9656
	0.207517	98.8026	96.7128	98.1224	98.0951	96.1017	94.9218	91.4923	87.8761		101.095	98.4736	97.4985	97.7486	99.1582	95.6273	94.3529	90.654		99.8586	98.6806	97.2879	96.979	96.7572	94.7569	93.7823	88.6814			0.207517	99.9188	0.662495	3	97.9557	0.624277	3	97.6363	0.250565	3	97.6076	0.329804	3	97.339	0.929048	3	95.102	0.26694	3	93.2091
	0.2764	98.7648	97.3105	97.6198	96.2502	95.6201	93.2652	90.5904	84.1633		100.756	99.7147	96.7053	97.217	98.9994	94.2987	92.9505	87.7675		99.4859	98.4583	97.3182	95.9464	95.9585	94.211	92.0295	85.5945			0.2764	99.669	0.582109	3	98.4945	0.694263	3	97.2144	0.269026	3	96.4712	0.383087	3	96.8593	1.07447	3	93.925	0.330855	3	91.8568
	0.345833	98.6136	97.2426	97.4719	95.4852	95.0632	92.6924	89.3483	82.1397		100.561	99.1155	96.4765	96.3884	98.8405	94.5341	91.7756	84.2753		100.154	97.1944	96.4091	95.5456	95.8946	92.8217	89.3173	82.3361			0.345833	99.7761	0.593001	3	97.8509	0.632496	3	96.7858	0.343588	3	95.8064	0.291503	3	96.5994	1.14596	3	93.3494	0.593544	3	90.1471
	0.415	97.8699	96.4412	96.5553	96.2202	94.8224	91.3764	85.2476	78.0926		102.021	97.5892	98.1696	96.2789	98.0623	92.9028	89.6343	82.4788		99.473	97.7222	97.2727	95.5764	96.0383	91.5647	87.6384	79.9733			0.415	99.7879	1.20858	3	97.2509	0.406655	3	97.3325	0.466976	3	96.0252	0.225008	3	96.3077	0.944912	3	91.9479	0.480508	3	87.5067
	0.484167	97.5926	95.6534	97.191	94.2703	93.2872	91.6086	84.3968	75.9458		100.026	97.4608	96.0799	97.4672	96.8393	92.3478	87.6255	79.996		99.91	96.2222	96.7121	94.775	94.0735	90.5061	86.0148	77.1532			0.484167	99.1763	0.792517	3	96.4454	0.533559	3	96.661	0.321757	3	95.5041	0.992267	3	94.7333	1.07716	3	91.4875	0.535084	3	86.0124
	0.553067	97.7691	94.7297	95.8013	94.0003	92.8356	88.5741	82.2018	73.0424		100.678	96.7047	94.9664	97.1701	97.7446	92.1292	86.6212	78.583		98.8946	97.0833	96.2273	94.5284	94.2013	89.0175	85.1292	74.9047			0.553067	99.1139	0.846856	3	96.1726	0.729676	3	95.665	0.370295	3	95.2329	0.980515	3	94.9272	1.46284	3	89.9069	1.11847	3	84.6507
	0.622483	96.7608	94.1049	95.3282	93.9103	92.655	88.7444	80.8235	71.2124		101.63	98.4308	95.0732	99.0306	95.8704	91.0864	85.0483	75.9184		99.126	97.1528	95.4545	94.143	93.0351	89.1499	83.8376	72.6944			0.622483	99.1721	1.40573	3	96.5628	1.28316	3	95.2853	0.112149	3	95.6947	1.66934	3	93.8535	1.01439	3	89.6602	0.722649	3	83.2365
	0.69165	97.0759	95.1915	95.3873	94.4053	92.7754	87.4129	79.7686	69.9806		98.8396	97.3609	95.3325	94.5904	95.8545	88.5806	83.8924	74.344		98.6247	95.7917	95.6667	93.5882	93.0511	88.4552	81.0332	69.6265			0.69165	98.1801	0.555568	3	96.1147	0.646742	3	95.4622	0.103464	3	94.1946	0.307893	3	93.8937	0.983635	3	88.1496	0.370094	3	81.5647
	0.760867	97.9834	95.2594	95.5648	93.2653	91.8874	87.6606	78.5094	67.1828		98.7093	97.3039	95.119	94.2777	94.9809	88.5637	81.5994	71.3969		97.8021	96.0694	94.4697	93.4649	92.492	86.6854	79.9262	70.0267			0.760867	98.1649	0.277169	3	96.2109	0.594394	3	95.0511	0.317928	3	93.6693	0.309595	3	93.1201	0.946636	3	87.6366	0.54236	3	80.0117
	0.829717	97.7439	93.9283	95.2839	94.0603	91.5864	86.8091	77.1652	65.6519		99.5046	97.3324	93.5479	93.1989	95.1557	88.5133	80.8035	70.4481		97.7506	94.6667	94.2424	93.4957	92.7316	85.8088	78.2841	68.1784			0.829717	98.333	0.585768	3	95.3091	1.03385	3	94.3581	0.504453	3	93.585	0.252647	3	93.1579	1.05217	3	87.0437	0.789484	3	78.7509
	0.89915	98.1976	94.0234	96.3779	93.2353	91.8272	85.4002	75.9401	64.3674		98.97	96.9615	94.3106	93.1051	94.4727	87.6387	79.5149	68.6314		97.8021	95.4306	95.4242	93.0641	92.7796	85.8419	77.2325	66.654			0.89915	98.3232	0.342957	3	95.4718	0.848413	3	95.3709	0.59738	3	93.1348	0.0516201	3	93.0265	0.773597	3	86.2936	0.684545	3	77.5625
	0.9683	97.4162	94.3629	94.5742	92.9354	91.6616	85.7253	73.3708	62.6958		98.5789	96.1912	94.7376	92.3702	93.6944	87.1174	78.7758	67.6423		98.2776	95.25	93.2727	92.2472	90.8307	84.6675	75.3321	64.8056			0.9683	98.0909	0.348387	3	95.268	0.527839	3	94.1949	0.463474	3	92.5176	0.21187	3	92.0622	0.850609	3	85.8368	0.709399	3	75.8262
	1.03722	97.5674	94.5939	93.9829	92.1854	90.0813	85.0286	73.609	61.2881		99.4654	96.3481	93.0445	99.2964	94.4886	87.521	77.0514	65.8054		98.5604	95.3611	93.7879	92.1547	91.4856	84.8164	74.5756	63.7005			1.03722	98.5311	0.548107	3	95.4343	0.507719	3	93.6051	0.28587	3	94.5455	2.37547	3	92.0185	1.29987	3	85.7887	0.868329	3	75.0787
	1.10663	97.8321	94.7976	94.2637	91.7804	90.2318	83.7436	72.7922	59.0885		99.3872	95.321	93.7919	92.1201	94.298	85.7047	76.5208	64.9374		97.892	95.1389	92.9545	91.0912	91.6454	84.1052	73.6716	62.5762			1.10663	98.3705	0.508678	3	95.0858	0.153393	3	93.6701	0.382814	3	91.6639	0.302656	3	92.0584	1.19183	3	84.5178	0.602536	3	74.3282
	1.17578	97.7187	93.3985	92.7558	91.6154	88.1397	82.087	70.7164	57.3817		99.4915	95.4208	93.5631	95.6848	93.0114	85.6206	75.1374	62.8381		97.3522	95.2361	94.6818	90.5518	90.3355	82.6166	70.3137	60.2706			1.17578	98.1875	0.660559	3	94.6852	0.64552	3	93.6669	0.558418	3	92.6173	1.56416	3	90.4955	1.40863	3	83.4414	1.10027	3	72.0558
	1.24497	98.1598	93.154	93.4358	90.9105	88.4859	81.5916	69.5933	57.1529		98.8527	95.8916	94.1275	92.2139	92.8526	85.3347	73.773	62.5757		98.3162	93.9583	93.5909	91.2454	90.1597	82.5008	69.7601	58.0221			1.24497	98.4429	0.209801	3	94.3346	0.812354	3	93.7181	0.209552	3	91.4566	0.390804	3	90.4994	1.27196	3	83.1424	1.12715	3	71.0422
	1.31387	98.2102	92.733	92.5192	92.0504	89.0728	81.2974	68.4363	55.0941		98.957	96.5906	92.6022	91.526	92.1379	83.8042	73.6024	60.0323		97.2365	93.9306	93.6818	90.5672	91.0543	81.955	68.6162	58.1936			1.31387	98.1346	0.498098	3	94.418	1.13996	3	92.9344	0.37447	3	91.3812	0.434238	3	90.755	0.897361	3	82.3522	0.750418	3	70.2183
	1.3833	96.8238	93.48	91.9722	89.8755	87.6279	80.2756	66.9049	54.3727		97.94	95.3067	92.1599	91.3383	92.0426	83.1988	73.2613	59.4065		99.1003	94.1806	93.7121	90.6289	89.4728	82.0046	67.3432	56.7835			1.3833	97.9547	0.657198	3	94.3224	0.532064	3	92.6147	0.551364	3	90.6142	0.422346	3	89.7144	1.28011	3	81.8263	0.848554	3	69.1698
	1.45245	96.4709	93.6566	93.3028	90.4005	86.9205	80.6317	66.2243	53.8448		97.0274	95.2639	92.4802	91.1038	92.1855	82.2065	71.2147	58.801		98.0463	94.8056	92.5	90.1665	89.361	79.871	66.7343	55.888			1.45245	97.1815	0.461259	3	94.5754	0.478047	3	92.761	0.270959	3	90.5569	0.281668	3	89.489	1.52122	3	80.9031	0.687732	3	68.0578
	1.52137	97.0885	92.6515	93.1106	89.8005	86.8302	78.7428	64.88	51.0118		97.9009	94.6362	92.0683	90.9006	92.8844	82.5765	70.9305	57.3476		97.0437	94.3611	93.7576	90.3206	89.2013	79.5567	66.6605	54.5922			1.52137	97.3444	0.278573	3	93.8829	0.620841	3	92.9788	0.492074	3	90.3406	0.317714	3	89.6386	1.76131	3	80.292	1.16616	3	67.4903
	1.59078	96.849	92.7601	93.1254	89.6655	86.1529	77.69	64.5397	51.1174		98.5658	96.5335	92.2819	90.6348	91.7726	81.7861	70.4946	56.1365		98.4062	93.7361	92.5152	90.151	88.2748	79.7056	65.1661	52.42			1.59078	97.9403	0.547612	3	94.3432	1.1308	3	92.6408	0.251469	3	90.1504	0.279799	3	88.7334	1.63838	3	79.7272	1.18247	3	66.7335
	1.65993	96.5339	92.9639	92.3714	89.2005	87.4022	76.9933	63.3486	50.0616		96.8449	94.5221	92.4954	90.8849	91.7408	80.777	69.3386	56.4191		97.1208	94.0139	92	89.7965	89.1054	78.3989	64.428	52.7439			1.65993	96.8332	0.169529	3	93.8333	0.458799	3	92.2889	0.148838	3	89.9607	0.493118	3	89.4161	1.26205	3	78.7231	1.10421	3	65.7051
	1.72915	97.2397	93.7109	92.6227	89.4555	87.1162	77.2565	62.5659	48.8826		97.9661	95.592	92.4344	90.4784	89.8666	79.5997	68.827	53.9968		96.491	94.375	91.303	89.1954	88.5304	78.2335	64.2066	52.096			1.72915	97.2323	0.425841	3	94.5593	0.55078	3	92.1201	0.412111	3	89.7098	0.391577	3	88.5044	0.794073	3	78.3633	0.679524	3	65.1999
	1.79828	95.8911	94.4037	91.8835	88.2856	85.3552	76.4205	61.8343	48.0556		97.6271	94.6505	90.4973	90.1657	90.0572	79.9361	67.5573	53.9968		97.9177	94.6111	90.8182	89.0259	86.7252	78.2666	63.155	50.7241			1.79828	97.1453	0.632697	3	94.5551	0.0765542	3	91.0663	0.418966	3	89.1591	0.546819	3	87.3792	1.39617	3	78.2077	1.01529	3	64.1822
	1.86743	98.0338	92.5156	90.7599	88.5556	84.9488	76.3895	61.0005	47.4749		97.3012	94.3937	91.3667	89.556	92.0743	80.5752	66.534	53.3105		97.4936	93.5417	91.5606	88.1782	88.5623	78.4651	61.9188	50.2668			1.86743	97.6095	0.219287	3	93.4837	0.542936	3	91.2291	0.241167	3	88.7632	0.411064	3	88.5285	2.05702	3	78.4766	1.20831	3	63.1511
	1.93662	96.912	92.896	90.8486	87.9106	85.009	75.151	60.3029	46.8239		96.6232	95.9486	90.4057	88.8211	89.7872	77.9179	65.8139	51.9984		96.8252	93.9583	90.9394	88.0395	86.5016	76.5796	61.9926	49.9238			1.93662	96.7868	0.0855526	3	94.2676	0.894704	3	90.7312	0.16485	3	88.2571	0.284479	3	87.0993	1.41133	3	76.5495	0.7989	3	62.7031
	2.00552	96.8238	91.7957	90.7895	87.7606	84.0608	75.2593	58.0568	45.7857		98.2008	95.8488	90.9549	90.2595	89.1201	78.0861	65.5865	51.191		96.1183	94.1806	90.7879	88.3785	86.901	76.348	60.4982	49.3712			2.00552	97.0476	0.611501	3	93.9417	1.1761	3	90.8441	0.0553936	3	88.7996	0.751466	3	86.694	1.46415	3	76.5645	0.823168	3	61.3805
	2.07493	96.7356	91.103	90.4347	88.1956	84.4822	74.2375	58.3291	44.7475		98.618	95.2639	91.2447	89.6029	90.4384	77.4302	64.8664	50.4239		97.0951	93.0278	91.2273	87.947	86.0383	75.6368	60.3506	48.8758			2.07493	97.4829	0.576961	3	93.1316	1.20228	3	90.9689	0.267152	3	88.5818	0.515551	3	86.9863	1.78352	3	75.7682	0.923994	3	61.182
	2.1441	96.6221	91.7685	90.4938	87.1456	84.0909	73.835	57.3592	43.7621		97.8227	93.9658	91.2599	88.9931	90.4384	77.7666	63.3314	49.6367		98.1362	93.4861	90.4545	87.5	87.1565	75.4383	59.4834	48.5899			2.1441	97.527	0.461412	3	93.0735	0.666995	3	90.7361	0.262158	3	87.8796	0.566086	3	87.2286	1.83271	3	75.6799	1.14137	3	60.058
	2.21298	97.0885	92.2983	90.6416	87.3856	83.4889	73.1383	56.4404	44.3076		96.3755	94.8359	90.8633	89.0713	89.3107	77.447	63.3693	48.6274		96.1568	93.5694	90.303	88.1165	85.9585	74.9421	59.0959	45.9413			2.21298	96.5403	0.281285	3	93.5679	0.73256	3	90.6027	0.162914	3	88.1911	0.488037	3	86.2527	1.68704	3	75.1758	1.24931	3	59.6352
	2.28243	96.912	91.7142	90.2868	86.8157	82.7664	72.5654	55.3173	42.7943		97.8227	95.5635	89.9481	87.5547	88.1353	77.1948	62.0618	48.4255		98.162	92.625	90.3939	87.3305	86.3738	74.3798	58.4502	45.9985			2.28243	97.6322	0.37318	3	93.3009	1.16144	3	90.2096	0.134353	3	87.2336	0.218775	3	85.7585	1.58011	3	74.7133	1.34674	3	58.6098
	2.35158	97.0381	91.9315	90.1242	86.3807	82.932	72.07	54.6197	41.9321		97.4185	94.0656	90.9701	88.4146	89.0407	76.4716	62.2323	47.8199		96.6452	92.5556	90.1818	86.9451	86.0543	74.6279	56.9373	45.3506			2.35158	97.0339	0.223233	3	92.8509	0.633508	3	90.4254	0.272873	3	87.2468	0.606217	3	86.009	1.76357	3	74.3898	1.27619	3	57.9298
	2.42075	96.2818	91.429	90.0059	85.6157	81.5774	71.5436	54.2113	41.3338		96.3755	94.0656	90.482	88.2583	87.5635	75.5298	61.7396	46.9116		96.581	92.4722	89.6515	88.3785	84.5527	72.7423	57.1587	44.9314			2.42075	96.4128	0.0883456	3	92.6556	0.766641	3	90.0465	0.240595	3	87.4175	0.901569	3	84.5645	1.72807	3	73.2719	1.18079	3	57.7032
	2.48965	96.6347	91.4425	88.6753	84.4458	82.1644	71.59	53.9051	41.5977		96.3494	96.077	89.6736	89.212	89.5807	74.8402	60.6974	45.4582		96.5039	93.7917	90.2121	87.1147	86.0064	72.0476	56.9557	45.1791			2.48965	96.496	0.0824613	3	93.7704	1.3379	3	89.5203	0.450198	3	86.9242	1.37919	3	85.9171	2.14138	3	72.826	1.01576	3	57.186
	2.55908	96.5465	90.5325	88.9267	85.3307	82.36	70.7695	52.9182	40.5948		97.5098	94.1084	90.1922	89.2276	88.3577	75.4793	59.9394	45.6803		97.3779	93.3611	89.4242	85.9279	83.8179	71.9319	55.8856	43.3498			2.55908	97.1447	0.301522	3	92.6673	1.08902	3	89.5144	0.368093	3	86.8287	1.21177	3	84.8452	1.80597	3	72.7269	1.41653	3	56.2477
	2.62823	95.9289	91.8636	89.3998	86.0507	81.6677	70.2586	53.3435	39.9085		96.4146	94.2796	89.5516	86.8043	87.8812	74.0666	58.8782	45.3371		97.0308	91.75	90.5303	87.6541	84.0735	72.61	55.6089	43.5213			2.62823	96.4581	0.318846	3	92.6311	0.824916	3	89.8272	0.354267	3	86.8364	0.463149	3	84.5408	1.80884	3	72.3117	1.10936	3	55.9435
	2.6974	97.3406	92.8416	89.8876	85.4957	81.6677	69.6238	51.5059	38.8879		96.4016	94.7218	89.155	87.1795	88.6753	74.1843	58.954	44.3076		95.2314	92.4722	88.3636	86.4057	83.0351	71.4853	54.3173	42.9497			2.6974	96.3245	0.610092	3	93.3452	0.696515	3	89.1354	0.44005	3	86.3603	0.486589	3	84.4594	2.14463	3	71.7645	1.3239	3	54.9257
	2.76658	97.7691	91.9587	88.2762	85.5707	80.885	69.0664	51.608	39.1519		96.9361	93.8802	89.1855	86.7886	87.6112	73.7134	57.8738	43.7828		96.144	91.6667	89.3788	85.8662	82.8754	70.559	54.5018	42.9116			2.76658	96.9497	0.469187	3	92.5019	0.694297	3	88.9468	0.339933	3	86.0752	0.366775	3	83.7905	1.99486	3	71.113	1.36976	3	54.6612
	2.83573	96.3701	91.429	88.4831	85.4207	81.171	68.4007	50.7232	38.624		96.5059	93.5521	88.0262	86.132	87.77	72.6707	57.9117	43.5002		95.1799	91.5694	89.803	85.8662	82.7796	69.6163	53.9299	41.311			2.83573	96.0186	0.421166	3	92.1835	0.685491	3	88.7708	0.532699	3	85.8063	0.207488	3	83.9068	1.98661	3	70.2292	1.27018	3	54.1882
	2.9049	97.9329	91.1845	87.8179	84.5508	80.3582	68.5091	50.6381	37.9553		96.6493	94.5221	88.3313	86.7261	87.3888	72.738	57.419	42.9754		96.3882	92.8889	88.0909	85.2343	82.3323	70.4267	52.6937	40.8346			2.9049	96.9901	0.477396	3	92.8652	0.96357	3	88.08	0.148317	3	85.5037	0.642245	3	83.3598	2.09357	3	70.5579	1.22255	3	53.5836
	2.9738	97.9329	91.429	88.5719	83.7258	80.3883	67.8743	49.8384	37.4274		98.279	94.3367	88.2855	86.3196	87.4047	72.368	56.4525	42.6726		95.6684	92.0278	88.2879	85.0339	82.4121	69.302	52.5461	41.1204			2.9738	97.2934	0.818651	3	92.5978	0.886448	3	88.3818	0.0950491	3	85.0264	0.748763	3	83.4017	2.08501	3	69.8481	1.32564	3	52.9457
	3.04322	96.1054	90.3015	87.8031	83.4708	80.298	67.1776	49.5491	36.5828		97.2751	93.9087	88.2855	86.3821	87.0553	71.8971	56.3199	42.3092		95.8483	91.4861	89.2576	84.8644	81.4696	69.1366	51.9188	40.5297			3.04322	96.4096	0.439065	3	91.8988	1.06154	3	88.4487	0.427733	3	84.9058	0.840669	3	82.941	2.08477	3	69.4038	1.36893	3	52.5959
	3.1124	96.0676	90.5596	87.5961	84.1308	78.7327	67.0847	49.7192	36.6004		96.6754	94.2939	88.6364	85.4284	86.4676	71.3925	55.4292	41.4009		95.6941	91.2778	88.5152	84.4482	82.3003	69.0539	51.679	39.596			3.1124	96.1457	0.285948	3	92.0438	1.144	3	88.2492	0.328421	3	84.6691	0.390532	3	82.5002	2.23511	3	69.177	1.24509	3	52.2758
	3.18155	96.1306	90.8449	88.4536	83.8758	79.6207	66.4035	48.4771	36.2309		96.7405	93.3096	88.8041	85.0063	86.2452	71.6112	55.0881	41.2596		96.2211	92.0556	87.2273	84.8952	81.7732	68.8554	50.9225	38.1288			3.18155	96.3641	0.190044	3	92.07	0.711528	3	88.1617	0.478033	3	84.5924	0.359735	3	82.5464	1.95102	3	68.9567	1.50419	3	51.4959
	3.25072	96.6221	89.6631	87.2265	83.2158	78.5822	66.837	48.375	35.9141		96.0495	93.7375	88.4228	85.8818	86.5311	70.6525	54.6523	40.7751		95.2699	91.2917	88.2879	84.8952	81.278	67.7969	50.5904	39.3864			3.25072	95.9805	0.391871	3	91.5641	1.18403	3	87.9791	0.378298	3	84.6643	0.778209	3	82.1304	2.33391	3	68.4288	1.14588	3	51.2059
	3.31988	95.7146	90.5325	88.084	83.8908	78.7327	65.3971	47.8986	34.9991		95.9583	93.4665	88.3771	84.1151	85.5305	69.7444	53.989	39.6245		95.0643	91.75	86.8333	84.3866	80.1917	67.433	50.4797	39.8628			3.31988	95.5791	0.266834	3	91.9163	0.851051	3	87.7648	0.473351	3	84.1308	0.143327	3	81.485	2.06615	3	67.5248	1.25578	3	50.7891
	3.3888	96.7482	90.4374	87.5665	82.5109	79.109	65.4745	47.1329	35.0343		96.3364	93.3096	87.7364	84.2871	85.8005	69.4248	53.7048	39.9879		95.1799	92.2917	87.8182	84.4328	79.8083	67.9788	49.9446	38.3003			3.3888	96.0882	0.46941	3	92.0129	0.840764	3	87.707	0.0741152	3	83.7436	0.617786	3	81.5726	2.12357	3	67.6261	1.15391	3	50.2608
	3.45822	97.7691	90.2065	87.5222	82.2859	79.0337	65.0875	46.6054	34.3832		95.7106	93.7518	88.5296	85.272	85.8958	69.7107	53.4205	39.3218		95.437	90.6806	87.5909	84.3557	79.9521	66.8045	49.3542	38.4337			3.45822	96.3056	0.736018	3	91.5463	1.11121	3	87.8809	0.324955	3	83.9712	0.883209	3	81.6272	2.15071	3	67.2009	1.34926	3	49.7934
	3.52738	96.2944	92.0674	86.6943	82.7659	77.348	64.6695	46.4182	33.8202		96.4798	93.4379	88.3771	84.0994	85.1493	69.9125	52.4161	38.8171		95.7198	90.8611	88.1212	82.6757	80.1118	66.9037	49.4465	37.2713			3.52738	96.1647	0.228785	3	92.1221	0.744374	3	87.7308	0.523528	3	83.1803	0.460288	3	80.8697	2.28371	3	67.1619	1.51905	3	49.427
	3.59653	95.7146	89.8261	86.6499	82.8259	77.5436	64.1431	45.8397	33.785		97.914	93.8374	87.1721	85.3815	84.2598	68.6512	52.4351	38.6153		96.2339	92.1944	87.1364	83.77	80.2236	65.6302	48.5424	37.7096			3.59653	96.6208	0.663703	3	91.9527	1.16424	3	86.9861	0.168416	3	83.9925	0.746082	3	80.6757	1.95193	3	66.1415	1.32626	3	48.9391
	3.6657	96.5087	90.7498	87.5961	82.1359	77.4383	64.5456	45.6185	33.5562		95.6063	95.1783	87.6602	84.6779	84.9428	67.9448	52.6435	37.7271		95.1671	90.875	87.2576	82.6911	79.5527	66.1264	48.2472	37.2904			3.6657	95.7607	0.394909	3	92.2677	1.45576	3	87.5046	0.124893	3	83.1683	0.771635	3	80.6446	2.2341	3	66.2056	0.982076	3	48.8364
	3.73487	96.6978	90.0978	87.33	82.6759	76.8362	63.3999	44.6486	33.4682		95.6714	92.525	87.9042	83.5053	85.197	67.5412	51.2412	38.1308		95.3342	91.3056	86.9091	83.246	78.6581	66.0767	47.8967	35.6707			3.73487	95.9011	0.410039	3	91.3094	0.700663	3	87.3811	0.288401	3	83.1424	0.24498	3	80.2304	2.53834	3	65.6726	1.21244	3	47.9288
	3.80377	95.9415	90.3966	87.2708	81.4309	77.348	63.307	45.2442	32.87		96.0365	93.6805	86.2416	83.646	83.831	68.2307	50.9759	36.8187		96.1954	90.9028	87.5455	82.8607	78.3227	65.1009	48.5424	36.0709			3.80377	96.0578	0.0740493	3	91.66	1.02076	3	87.0193	0.396844	3	82.6459	0.6484	3	79.8339	2.01827	3	65.5462	1.43869	3	48.2542
	3.87293	95.9919	89.9348	86.5612	80.276	76.761	63.1832	44.6656	32.2013		96.558	93.4379	86.7755	83.0988	83.7992	66.6162	50.4832	36.5967		95.2571	91.1389	86.9848	82.4445	79.4888	65.7625	47.5461	36.5091			3.87293	95.9357	0.376604	3	91.5039	1.02761	3	86.7738	0.122297	3	81.9398	0.853063	3	80.0164	2.04882	3	65.1873	1.03192	3	47.565
	3.94235	95.9667	90.9128	85.4524	82.2709	76.0385	62.6877	43.8659	32.3949		96.219	92.7389	86.7755	82.833	83.418	67.1208	49.801	36.4554		94.8972	92.1389	86.6364	82.2287	78.2907	65.2332	47.2878	35.766			3.94235	95.6943	0.405172	3	91.9302	0.537388	3	86.2881	0.419764	3	82.4442	0.194784	3	79.2491	2.18351	3	65.0139	1.2844	3	46.9849
	4.01153	95.7651	91.2116	86.1768	81.7459	76.46	62.5019	43.7128	31.9198		95.9713	92.0399	86.0738	83.5366	82.7986	66.7508	49.5168	36.5563		95.0514	90.4306	86.5152	81.828	77.9393	64.4889	46.5129	35.5183			4.01153	95.5959	0.278695	3	91.2274	0.464655	3	86.2553	0.133299	3	82.3702	0.583694	3	79.066	1.91456	3	64.5805	1.22738	3	46.5808
	4.08043	95.6516	91.7278	85.2158	80.636	76.3847	61.4801	43.7468	31.8494		95.3716	92.4108	86.2416	81.7073	82.4809	65.8762	49.2136	36.2737		94.7301	90.4444	86.3939	82.275	78.0511	64.0423	46.107	35.423			4.08043	95.2511	0.272764	3	91.5277	0.5764	3	85.9505	0.369931	3	81.5394	0.480529	3	78.9723	1.8191	3	63.7996	1.27484	3	46.3558
	4.14985	97.0255	88.4814	86.0142	80.336	76.2041	62.0529	42.862	31.3919		96.4146	93.3524	85.0976	82.0826	82.338	66.9694	48.8535	35.87		95.6941	90.1528	87.2576	81.7663	78.115	63.7115	45.7011	34.1273			4.14985	96.3781	0.384768	3	90.6622	1.42901	3	86.1231	0.625901	3	81.395	0.537299	3	78.8857	1.81215	3	64.2446	1.44407	3	45.8055
	4.21902	96.3322	90.2608	86.6943	80.891	75.6623	61.8052	42.5727	31.2159		95.6975	92.7675	86.9128	83.1926	82.068	65.338	48.285	35.3048		95.2185	89.875	85.3333	80.9803	77.5559	64.4558	45.0738	34.9085			4.21902	95.7494	0.322552	3	90.9678	0.906726	3	86.3134	0.494101	3	81.688	0.752777	3	78.4287	1.89997	3	63.8664	1.06157	3	45.3105
	4.28818	96.6347	89.8805	86.0438	79.916	75.9332	61.1705	42.5898	31.2159		94.8501	92.8673	85.5705	82.4891	83.4022	64.9176	47.9629	35.8902		94.6787	90	85.9394	82.799	76.901	62.223	45.2952	34.3941			4.28818	95.3878	0.625419	3	90.9159	0.976308	3	85.8512	0.143565	3	81.7347	0.913736	3	78.7454	2.34507	3	62.7703	1.11579	3	45.2826
	4.35708	96.5087	89.4051	86.2064	80.111	75.2559	61.3408	41.9942	30.5296		94.9283	93.4237	84.9603	82.7548	82.7192	65.523	47.6028	35.002		95.1285	91.2639	85.7121	81.643	76.3578	62.9673	44.7232	34.032			4.35708	95.5218	0.496804	3	91.3642	1.16116	3	85.6263	0.362255	3	81.503	0.766423	3	78.111	2.32597	3	63.277	1.21721	3	44.7734
	4.42677	95.9289	89.2421	86.6351	80.906	75.3612	60.3189	41.8751	31.1983		94.9413	92.6106	84.64	81.8949	81.2897	65.0353	47.9629	34.4974		95.0771	90.1806	86.2273	80.2096	77.6358	61.5448	44.1144	34.375			4.42677	95.3158	0.309058	3	90.6777	1.00368	3	85.8341	0.608558	3	81.0035	0.488946	3	78.0956	1.72678	3	62.2997	1.41285	3	44.6508
	4.49593	96.7104	89.9212	85.2306	80.036	74.4281	59.9783	41.2966	30.3713		94.3155	92.796	85.9213	82.2545	82.3539	64.6317	47.3375	34.3964		95.2828	89.6389	86.1515	80.5641	75.9585	61.3629	43.8007	34.5655			4.49593	95.4362	0.695577	3	90.7854	1.00862	3	85.7678	0.276692	3	80.9515	0.66909	3	77.5801	2.42741	3	61.991	1.37953	3	44.1449
	4.56485	96.2062	90.6955	85.3193	79.946	74.5635	60.5202	40.4458	29.7202		94.9153	92.311	84.7773	81.5041	81.2421	64.5308	46.7311	34.6992		93.6118	89.9167	85.4545	80.5795	76.0543	61.7929	43.8192	33.6319			4.56485	94.9111	0.748933	3	90.9744	0.705106	3	85.1837	0.206929	3	80.6765	0.452384	3	77.2866	2.024	3	62.2813	1.18323	3	43.6654
	4.63427	95.1727	90.3559	86.0585	80.441	74.5184	59.5603	41.0754	30.2129		95.7366	91.6405	85.1434	81.2383	82.7192	63.9926	47.0153	34.0735		95.0386	89.6389	85.5	80.8878	75.8946	61.3298	42.9151	32.7553			4.63427	95.316	0.213875	3	90.5451	0.585512	3	85.5673	0.266322	3	80.8557	0.230717	3	77.7107	2.53556	3	61.6276	1.28813	3	43.6686
	4.70342	95.4122	88.7938	85.1124	79.061	74.413	58.91	40.4969	29.597		95.6845	92.6248	85.6772	81.2852	81.7344	64.0262	46.2194	33.9524		94.7686	90.2639	86.0303	81.7201	75.8626	61.4456	43.4686	32.3933			4.70342	95.2884	0.271524	3	90.5608	1.11584	3	85.6066	0.267328	3	80.6888	0.82349	3	77.3367	2.23834	3	61.4606	1.47694	3	43.395
	4.77233	95.513	90.6411	85.6446	79.436	74.3076	58.6623	40.633	29.4915		94.824	92.1113	85.1129	80.05	81.5438	63.9758	46.2384	33.2055		95	90.25	85.8333	79.8397	75.5112	60.8832	42.583	32.298			4.77233	95.1123	0.206671	3	91.0008	0.566599	3	85.5303	0.215692	3	79.7753	0.180152	3	77.1209	2.2386	3	61.1738	1.54073	3	43.1515
	4.84175	96.5465	90.0299	85.1419	79.376	74.5635	59.2971	39.9524	29.3683		94.8631	92.9101	85.7688	80.7692	80.9879	62.5126	45.8025	33.3064		94.6401	90.1806	85.6212	79.9014	75.3355	59.8578	42.7306	32.1646			4.84175	95.3499	0.601757	3	91.0402	0.935981	3	85.5106	0.189208	3	80.0155	0.406214	3	76.9623	2.02511	3	60.5558	0.99169	3	42.8285
	4.91092	96.5591	88.7938	85.0828	78.2511	74.2173	59.0184	39.2547	29.034		94.6154	92.7104	83.8011	80.4409	81.5121	62.3949	45.1961	33.2459		93.946	89.8472	85.9545	79.7472	74.7125	60.6351	41.9373	31.936			4.91092	95.0402	0.783665	3	90.4505	1.17017	3	84.9461	0.625391	3	79.4797	0.646137	3	76.814	2.3534	3	60.6828	0.974994	3	42.1294
	4.98033	93.8619	89.636	85.1863	78.4161	73.5099	58.9875	39.1016	28.7172		94.1069	92.0827	85.2959	79.878	81.2262	62.3108	44.9308	32.9027		94.2674	89.4583	85.1364	80.0247	75.4952	60.3209	42.4354	32.1075			4.98033	94.0787	0.117901	3	90.3923	0.846751	3	85.2062	0.047121	3	79.4396	0.513505	3	76.7438	2.31332	3	60.5397	0.965585	3	42.1559
	5.04925	95.0214	89.3643	85.4967	78.0111	72.6972	58.2753	39.4419	28.4357		94.6154	91.4836	83.7553	79.7842	80.1144	61.4867	44.7603	32.6201		94.383	89.5278	86.4394	79.4236	74.6965	59.6593	41.9926	31.936			5.04925	94.6733	0.18655	3	90.1252	0.680821	3	85.2305	0.786172	3	79.073	0.541045	3	75.836	2.21567	3	59.8071	0.930004	3	42.0649
	5.11867	95.3869	88.5765	84.4323	78.0861	73.6905	57.8882	38.5401	28.5413		94.7718	93.01	85.4027	80.5347	81.2579	62.294	45.234	32.3577		95.5527	90.2083	84.3788	78.8995	74.4409	59.4939	41.679	31.3072			5.11867	95.2372	0.23753	3	90.5983	1.29461	3	84.7379	0.332739	3	79.1734	0.72	3	76.4631	2.40717	3	59.892	1.28732	3	41.8177
	5.18783	96.0928	89.799	84.4471	78.8211	72.652	57.5941	38.7443	28.2773		94.837	91.8973	84.518	79.878	80.7179	61.5708	44.1349	31.9943		94.8201	89.0972	84.6061	79.7164	74.7604	58.9646	41.0148	30.9832			5.18783	95.2499	0.421439	3	90.2645	0.841156	3	84.5237	0.0459852	3	79.4718	0.328717	3	76.0434	2.41519	3	59.3765	1.16631	3	41.298
	5.25673	94.9206	88.9568	84.2549	78.8211	72.9229	56.8664	38.472	28.1893		95.3194	91.2126	84.2587	80.8943	79.2408	61.3858	43.6991	31.7925		94.5501	89.0556	85.8636	78.9766	74.4888	59.6427	40.7565	30.3354			5.25673	94.93	0.222128	3	89.7416	0.736007	3	84.7924	0.535619	3	79.564	0.666678	3	75.5508	1.89954	3	59.2983	1.31596	3	40.9758
	5.3259	95.3491	89.0926	84.8167	77.7411	72.5166	57.207	37.7914	27.8902		95.3977	91.9544	84.1824	80.3627	79.5902	60.8644	43.5475	31.1062		92.635	88.6667	85	79.6239	73.6262	58.3361	40.7749	31.0404			5.3259	94.4606	0.912917	3	89.9046	1.03225	3	84.6664	0.247689	3	79.2426	0.780445	3	75.2443	2.19643	3	58.8025	1.08126	3	40.7046
	5.39532	95.5004	88.9025	85.1419	78.5511	72.5015	56.6342	38.1487	27.4679		95.7366	91.9258	84.335	80.0188	78.9231	60.5785	43.6801	31.4291		94.7558	88.875	84.197	79.516	72.8275	58.9811	40.6642	31.1547			5.39532	95.3309	0.295554	3	89.9011	1.01239	3	84.558	0.294693	3	79.362	0.430633	3	74.7507	2.08833	3	58.7313	1.14548	3	40.831
	5.46423	95.4374	88.6851	83.9888	78.0411	72.5617	56.6032	37.8765	27.4679		94.0417	91.883	84.5638	80.394	79.1455	60.3095	43.1495	31.1667		93.8432	88.6389	84.4848	79.1153	73.0192	57.8399	40.369	30.545			5.46423	94.4408	0.501587	3	89.7357	1.07375	3	84.3458	0.179963	3	79.1835	0.680079	3	74.9088	2.12246	3	58.2508	1.08946	3	40.465
	5.53365	94.3156	88.7259	83.9888	77.1561	71.6586	56.6187	37.366	27.3271		94.7066	91.3695	83.6486	78.3458	80.2573	60.0404	42.581	30.9245		93.7532	88.7083	85	77.9285	72.8914	57.4429	39.9077	30.2591			5.53365	94.2585	0.276712	3	89.6012	0.884135	3	84.2124	0.405839	3	77.8102	0.348496	3	74.9358	2.68446	3	58.034	1.03102	3	39.9516
	5.60282	94.908	89.0247	84.8758	77.8161	71.3275	56.2471	37.417	27.4679		93.8722	92.1683	83.9994	78.6742	78.4625	59.9226	42.979	30.5813		92.8149	89.2083	84.6364	78.5142	73.1629	57.5587	39.6494	30.2591			5.60282	93.865	0.604231	3	90.1338	1.01865	3	84.5039	0.261532	3	78.3348	0.263435	3	74.3177	2.13909	3	57.9095	1.07543	3	40.0152
	5.67172	94.0635	89.2964	84.1366	77.6211	71.4931	55.7517	37.1108	27.0808		94.3025	91.127	82.6571	79.1432	79.209	59.334	41.7283	30.7832		92.9434	88.125	84.4545	77.8514	73.3067	58.088	39.262	29.4588			5.67172	93.7698	0.418905	3	89.5161	0.873527	3	83.7494	0.553815	3	78.2053	0.473669	3	74.6696	2.32931	3	57.7246	1.04998	3	39.367
	5.74115	94.7567	88.8481	83.6487	77.0961	71.4028	55.7207	36.5493	26.8344		95.4107	91.7404	84.0757	79.3621	78.3355	59.2331	42.9032	30.3391		93.7147	88.1389	84.2727	78.2676	73.3866	57.7737	39.631	29.6494			5.74115	94.6274	0.49386	3	89.5758	1.10148	3	83.999	0.184162	3	78.2419	0.654249	3	74.3749	2.0614	3	57.5758	1.01876	3	39.6945
	5.81032	95.1097	88.9161	83.4713	76.4362	72.0199	55.4111	36.3281	26.4121		93.8853	91.7689	84.4417	78.5335	78.9231	58.6276	42.0883	30.1171		93.6889	89.0694	83.2727	78.0826	72.5719	57.261	39.797	29.9543			5.81032	94.228	0.444474	3	89.9181	0.926442	3	83.7286	0.361147	3	77.6841	0.637381	3	74.505	2.21482	3	57.0999	0.93204	3	39.4045
	5.87948	94.7063	88.9568	83.9592	76.4212	71.4329	55.055	36.5663	26.4825		94.3677	91.9544	83.2672	79.1432	78.399	59.5526	41.7851	30.3795		93.9717	88.8333	83.6818	78.6529	72.1086	56.7979	38.6162	29.4207			5.87948	94.3486	0.212278	3	89.9148	1.02038	3	83.6361	0.201056	3	78.0724	0.83767	3	73.9802	2.21801	3	57.1352	1.30927	3	38.9892
	5.94863	96.0045	88.2912	83.6635	76.7962	71.8543	54.9466	35.7836	26.5177		94.6415	92.0114	83.4655	78.7836	78.1766	59.3845	41.3303	29.4308		94.2802	88.6944	84.1364	77.651	72.8914	55.9709	38.8745	29.0206			5.94863	94.9754	0.525029	3	89.6657	1.17862	3	83.7551	0.198997	3	77.7436	0.575591	3	74.3074	1.95762	3	56.7673	1.34157	3	38.6628
	6.0178	95.6264	88.1826	83.3383	77.2911	71.0716	55.055	35.8176	25.9194		95.6323	90.8987	83.8316	78.0331	78.256	59.1322	41.2735	29.7537		93.7661	88.3056	83.1667	77.8822	72.2364	56.4505	38.5978	28.0869			6.0178	95.0083	0.621104	3	89.1289	0.885599	3	83.4455	0.199299	3	77.7355	0.226416	3	73.8547	2.22621	3	56.8792	1.19635	3	38.5629
	6.08697	95.3239	89.3507	83.5009	76.4662	70.8459	54.6369	35.7836	26.3769		95.2021	91.7404	82.7181	79.065	78.2084	58.3922	40.8944	29.4106		94.0103	88.1111	84.2879	77.7744	71.7252	56.1197	38.0258	28.7919			6.08697	94.8454	0.419053	3	89.7341	1.06507	3	83.5023	0.453151	3	77.7685	0.750232	3	73.5932	2.32153	3	56.383	1.09201	3	38.2346
	6.15587	95.5886	88.2233	83.2791	75.8962	70.2739	54.0796	36.0048	25.6907		94.1721	91.4836	84.2739	79.1901	77.4619	57.5681	41.0081	29.6528		92.9692	87.6806	82.7576	76.1406	71.4537	55.6401	38.0074	28.7348			6.15587	94.2433	0.75701	3	89.1292	1.1876	3	83.4369	0.444789	3	77.0756	1.05959	3	73.0632	2.22557	3	55.7626	1.00891	3	38.3401
	6.2253	94.3408	87.7207	83.8261	76.2262	70.9663	53.8473	35.3752	26.0954		95.7627	91.4123	83.2672	78.6429	78.0972	57.9717	40.667	29.0069		93.162	88.2639	83.0909	77.0654	71.5016	55.5905	37.8598	28.8872			6.2253	94.4218	0.751867	3	89.1323	1.15072	3	83.3948	0.221613	3	77.3115	0.708415	3	73.5217	2.29296	3	55.8032	1.19536	3	37.9673
	6.29445	94.177	88.1146	82.5991	75.8812	69.9579	53.4758	35.3412	25.4971		94.3677	91.5264	83.2977	78.94	78.4943	56.8449	40.6291	29.0472		94.2545	88.2083	83.1515	76.5259	71.6613	55.0612	37.9705	28.2012			6.29445	94.2664	0.0553726	3	89.2831	1.12196	3	83.0161	0.212756	3	77.1157	0.930928	3	73.3712	2.60833	3	55.1273	0.973157	3	37.9803
	6.36337	95.9289	87.9245	83.427	76.5412	69.7321	53.8164	35.12	25.5499		94.5502	91.1555	82.6876	78.4396	77.5889	57.299	40.0417	28.4013		93.7147	88.9583	83.1212	77.3582	71.0064	54.6312	37.5277	28.3727			6.36337	94.7313	0.64558	3	89.3461	0.952651	3	83.0786	0.214496	3	77.4463	0.549813	3	72.7758	2.43452	3	55.2489	1.05172	3	37.5631
	6.43278	94.9962	88.2097	82.7469	75.2962	70.0331	53.2126	34.5755	25.2332		94.0417	91.7404	82.5656	77.5485	77.5095	57.0972	40.0038	28.9261		92.9306	88.875	83.3788	77.1116	70.4633	54.9785	37.0664	27.9916			6.43278	93.9895	0.596867	3	89.6084	1.08316	3	82.8971	0.24647	3	76.6521	0.689561	3	72.6686	2.42363	3	55.0961	1.12294	3	37.2152
	6.50193	95.0466	89.2285	82.5991	75.9112	69.6568	52.9958	35.0859	24.8636		95.7627	92.8816	83.3435	78.0957	78.2243	56.8113	40.0985	28.9463		93.0848	88.2361	82.9091	76.5259	70.3674	55.3755	37.214	27.9535			6.50193	94.6314	0.800433	3	90.1154	1.41246	3	82.9505	0.215902	3	76.8443	0.650386	3	72.7495	2.74506	3	55.0609	1.11261	3	37.4662
	6.57085	95.1223	87.8294	82.3773	75.1312	69.3709	53.0268	34.5244	25.2507		93.9374	91.0271	82.6266	78.0801	77.8272	57.6017	39.7953	28.5426		92.8278	88.6806	82.303	77.0191	70.9425	55.1439	37.1033	27.9726			6.57085	93.9625	0.662484	3	89.179	0.956152	3	82.4356	0.0978569	3	76.7435	0.862333	3	72.7135	2.59678	3	55.2575	1.3219	3	37.141
	6.64027	94.9206	88.0875	82.9539	75.0862	69.6418	52.5159	33.9969	24.8812		93.09	91.5977	82.4436	77.3921	77.5095	56.3909	39.909	28.3004		93.0463	88.375	83.6212	76.6338	70.3994	53.9034	36.7343	27.763			6.64027	93.6856	0.61762	3	89.3534	1.12523	3	83.0062	0.340964	3	76.3707	0.678519	3	72.5169	2.50588	3	54.27	1.13353	3	36.8801
	6.70943	94.2274	88.3863	82.8208	75.2362	68.4979	52.6088	33.7077	25.0748		93.7158	92.0685	83.3282	77.8455	77.2872	56.004	39.0373	28.3004		93.419	87.8194	83.0909	76.2022	71.1981	55.0281	36.3838	28.0488			6.70943	93.7874	0.236085	3	89.4247	1.33196	3	83.08	0.146584	3	76.428	0.76165	3	72.3277	2.59935	3	54.547	1.00923	3	36.3763
	6.7786	94.366	89.147	82.0964	75.0712	69.2203	52.3301	33.8948	24.7405		92.2816	91.3267	82.9012	77.1732	77.2236	56.1218	38.791	27.614		93.2391	88.0833	82.6515	75.9864	70.4153	54.6146	36.1624	27.1532			6.7786	93.2956	0.602377	3	89.519	0.954573	3	82.5497	0.237831	3	76.077	0.608475	3	72.2864	2.49258	3	54.3555	1.10221	3	36.2827
	6.84752	95.3995	87.8701	84.2549	74.5613	69.0247	51.7727	33.9119	24.7932		94.133	90.699	82.0012	77.8455	76.5089	56.5422	39.4542	27.9168		93.5733	88.0139	83.5909	75.894	70.655	54.1846	36.0332	27.2294			6.84752	94.3686	0.540206	3	88.861	0.919931	3	83.2823	0.66862	3	76.1003	0.953679	3	72.0628	2.27229	3	54.1665	1.37686	3	36.4664
	6.91693	94.6937	87.3947	82.806	74.5763	68.7839	51.1534	33.6907	25.0044		94.9022	90.0428	82.8554	77.9862	77.0172	55.4995	38.8289	27.6544		94.0617	87.3611	80.8788	77.0962	69.3131	53.0764	36.0886	27.2104			6.91693	94.5525	0.252696	3	88.2662	0.888346	3	82.1801	0.650798	3	76.5529	1.02117	3	71.7047	2.66061	3	53.2431	1.25737	3	36.2027
	6.98608	95.0971	88.0603	82.1112	74.9813	68.242	51.7418	33.7587	24.5293		95.3716	89.7004	81.986	77.1107	76.1595	55.3313	38.5636	27.4122		93.8817	87.8056	81.2121	75.971	70.1597	53.5395	35.8856	27.3628			6.98608	94.7835	0.457767	3	88.5221	0.593737	3	81.7698	0.281151	3	76.021	0.615224	3	71.5204	2.38468	3	53.5375	1.03622	3	36.0693
	7.055	95.5508	87.3947	82.9539	73.5413	68.6033	51.1999	33.2483	24.3005		93.6767	90.4708	81.7419	77.142	76.1595	56.004	38.0898	27.3314		93.5604	88.1111	81.5	75.6936	69.1214	52.4479	35.5535	26.6197			7.055	94.2626	0.644959	3	88.6589	0.92925	3	82.0653	0.449758	3	75.459	1.04601	3	71.2947	2.43697	3	53.2173	1.43921	3	35.6305
	7.12442	93.7988	88.6308	81.5346	73.9313	68.3173	51.494	32.993	24.4765		93.807	90.9843	82.1995	76.6573	76.4136	55.7686	38.2035	27.1296		93.5604	87.9583	81.7576	75.2004	70.0799	52.3321	35.3321	26.5053			7.12442	93.7221	0.080878	3	89.1911	0.917356	3	81.8306	0.195384	3	75.263	0.787548	3	71.6036	2.45824	3	53.1982	1.30774	3	35.5095
	7.19358	94.3408	87.4898	81.3868	74.1863	68.1517	51.0915	32.7888	23.9662		93.8592	90.3424	82.0622	76.2508	77.176	55.1295	37.8814	27.0892		92.8278	87.7639	79.8333	75.1233	68.8179	52.8779	34.7048	26.5244			7.19358	93.6759	0.446289	3	88.532	0.908625	3	81.0941	0.659856	3	75.1868	0.596812	3	71.3819	2.90343	3	53.033	1.16824	3	35.125
	7.26248	94.429	88.4678	82.8356	74.4863	68.6033	50.5651	32.5847	24.0366		93.4159	90.5136	81.6046	76.0788	76.0324	54.8604	37.1992	26.8874		94.5758	88.25	80.0758	76.0481	68.2748	52.9937	35.5351	27.0008			7.26248	94.1403	0.364647	3	89.0771	0.720962	3	81.5053	0.798243	3	75.5377	0.525796	3	70.9701	2.53291	3	52.8064	1.24348	3	35.1063
	7.33192	95.0592	88.0331	82.2442	73.3313	68.5129	51.0451	33.0441	24.1598		93.1551	90.3424	80.3539	75.9225	75.1747	54.4736	37.0476	26.3827		93.6118	87.25	79.4394	75.0308	68.738	52.1171	34.5572	27.0008			7.33192	93.9421	0.573929	3	88.5418	0.928218	3	80.6792	0.825862	3	74.7615	0.760014	3	70.8086	2.18404	3	52.5453	1.01262	3	34.8829
	7.40108	93.7358	87.7479	81.1798	74.5463	67.8055	51.3083	32.2954	23.8782		94.6415	90.5991	80.8725	75.3596	75.683	54.7763	37.5403	26.524		94.1388	87.2778	80.5303	75.5703	68.4345	51.9352	34.3173	26.4672			7.40108	94.172	0.261963	3	88.5416	1.03768	3	80.8609	0.187579	3	75.1587	0.312204	3	70.641	2.52751	3	52.6732	1.067	3	34.7177
	7.46998	93.2821	88.4678	81.8155	73.4363	67.4744	50.8128	32.1082	23.9838		94.8892	90.271	79.698	75.9225	76.223	54.1372	38.0709	26.4231		93.8817	87.4444	79.8333	74.8459	68.2428	51.2901	34.1144	25.9718			7.46998	94.0177	0.468881	3	88.7278	0.826256	3	80.4489	0.684393	3	74.7349	0.719823	3	70.6467	2.79694	3	52.0801	1.03778	3	34.7645
	7.5394	95.0971	88.5221	81.0171	73.3463	67.5497	50.5961	32.4826	23.7903		94.472	90.5278	80.903	75.2814	75.4288	54.1204	36.4791	26.5644		92.6478	87.2361	80.1364	74.7534	68.738	51.2901	34.4834	26.7912			7.5394	94.0723	0.734736	3	88.762	0.957775	3	80.6855	0.276541	3	74.4604	0.577507	3	70.5722	2.45244	3	52.0022	1.07789	3	34.4817
	7.60857	94.5803	87.2317	81.7268	73.7063	68.0614	50.1626	32.4485	23.3855		93.2855	89.8716	82.4131	76.2508	75.4924	54.0531	36.3275	26.524		92.5964	88.1528	80.5	74.553	66.8051	51.5382	33.7823	26.0671			7.60857	93.4874	0.581527	3	88.4187	0.77358	3	81.5466	0.559552	3	74.8367	0.748095	3	70.1196	2.71074	3	51.918	1.13905	3	34.1861
	7.67748	93.4963	87.0416	81.505	73.8113	67.9561	49.6516	32.0061	23.2624		94.0678	90.913	80.781	74.8124	75.1906	53.885	36.119	25.9386		93.5219	88.1389	80.8636	74.815	68.3387	51.6044	33.8376	25.7812			7.67748	93.6953	0.186381	3	88.6978	1.15199	3	81.0499	0.228825	3	74.4796	0.334134	3	70.4951	2.35034	3	51.7137	1.22327	3	33.9876
	7.7469	95.4248	87.8158	81.2537	72.6714	67.5497	49.7136	31.7509	23.3327		92.8422	90.7561	79.9573	74.828	75.2859	53.2122	36.517	26.1607		93.3162	88.9444	80.1667	74.4914	68.099	51.257	33.69	26.1814			7.7469	93.8611	0.793725	3	89.1721	0.856376	3	80.4592	0.401812	3	73.9969	0.669862	3	70.3115	2.49223	3	51.3943	1.01231	3	33.986
	7.8158	95.0718	88.1011	81.2685	73.1363	66.7821	49.5123	31.5807	23.2272		94.7849	89.3581	80.6589	74.3746	74.9047	53.0777	35.9295	26.0799		93.3676	87.6944	80.1061	74.8921	67.4601	50.3639	33.1181	24.8095			7.8158	94.4081	0.526804	3	88.3845	0.500723	3	80.6778	0.335695	3	74.1344	0.520889	3	69.7156	2.60192	3	50.9846	1.07502	3	33.5428
	7.88548	93.7736	87.7886	80.6771	73.1213	66.9627	49.2336	31.6488	23.2272		93.5984	89.8288	80.9487	76.0319	74.73	53.5486	36.3275	25.6762		91.5681	87.7917	79.9848	74.3372	67.0447	50.7443	33.524	24.9809			7.88548	92.9801	0.707781	3	88.4697	0.679556	3	80.5369	0.286949	3	74.4968	0.843984	3	69.5791	2.57554	3	51.1755	1.26415	3	33.8334
	7.9544	93.824	87.4219	81.9338	73.4213	67.2486	48.7227	31.2234	23.2272		94.7458	89.0728	81.1623	75.7036	75	53.2122	35.4558	25.5147		93.3162	88.0417	79.9242	73.8594	67.3323	50.9428	32.7306	25.3811			7.9544	93.962	0.418403	3	88.1788	0.481465	3	81.0068	0.58529	3	74.3281	0.699258	3	69.8603	2.56996	3	50.9592	1.29604	3	33.1366
	8.02382	94.7441	87.1231	80.2779	73.6763	66.2101	49.2801	31.2574	22.8752		94.0417	89.8431	79.9725	75.1876	74.9524	52.96	36.0811	25.2321		93.3548	87.9028	80.0606	73.9211	67.4121	50.6947	32.952	25.0381			8.02382	94.0469	0.401088	3	88.2896	0.808676	3	80.1037	0.0907554	3	74.2617	0.468333	3	69.5249	2.73584	3	50.9782	1.07172	3	33.4302
	8.09298	94.5299	87.8973	80.7067	73.6163	66.9928	48.8775	30.798	22.5585		93.9765	90.2425	79.7285	75.2814	74.5076	52.8254	35.1336	25.2725		92.0437	87.4306	80.8485	74.029	67.1565	50.2646	32.8413	25.2668			8.09298	93.5167	0.753623	3	88.5235	0.870022	3	80.4279	0.352084	3	74.3089	0.500639	3	69.5523	2.4781	3	50.6559	1.15632	3	32.9243
	8.16188	94.908	87.7343	81.8303	73.0613	66.466	48.9395	31.6658	22.6113		93.2986	90.1141	80.1251	74.4215	74.2535	52.9263	35.0199	25.1312		93.2134	87.0139	79.9848	73.7053	66.869	50.1819	32.2694	24.7523			8.16188	93.8066	0.551222	3	88.2874	0.936718	3	80.6467	0.593155	3	73.7294	0.392829	3	69.1962	2.53134	3	50.6826	1.17782	3	32.985
	8.23132	94.5425	86.4711	80.0857	72.6714	66.2402	48.7227	30.6789	22.8752		94.7588	90.0428	79.5149	73.9212	73.8247	52.2368	34.7925	25.3129		92.365	87.1528	80.1667	74.5993	66.3419	49.3219	32.2694	24.3331			8.23132	93.8888	0.764422	3	87.8889	1.09479	3	79.9225	0.205088	3	73.7306	0.564634	3	68.8022	2.51138	3	50.0938	1.08537	3	32.5803
	8.30047	93.7106	86.2673	80.8545	72.2964	66.18	48.0725	31.1554	22.6817		91.6558	31.2839	11.8822	9.67792	9.49809	7.08039	7.23896	7.52927		95.1285	25.5278	12.1061	9.52528	8.81789	7.44294	9.48339	11.1471			8.30047	94.3134	1.36147	3	27.9565	1.72132	3	11.8893	0.123193	3	9.35592	0.249602	3	8.62891	0.564346	3	6.87445	0.401111	3	7.4912
	9.72533	96.1558	27.0579	11.6795	8.86456	7.57074	6.10002	5.75123	6.17632		91.2647	30.9986	11.9585	9.803	9.08513	6.6263	6.89786	7.26686		93.7918	25.6806	12.1818	9.26326	8.59425	7.16176	8.63469	9.94665			9.72533	93.666	1.35155	3	28.0029	1.57166	3	11.9005	0.181486	3	9.34027	0.247935	3	8.40166	0.460386	3	6.5313	0.394288	3	6.91309
	9.79478	95.9415	27.3295	11.5612	8.95455	7.52559	5.80585	5.20674	5.49006		92.3598	31.2696	12.1415	9.81864	9.13278	6.87857	6.78416	6.66128		93.0977	25.5417	12.0152	9.17078	8.33866	6.6821	7.78598	9.50838			9.79478	93.3795	0.684755	3	28.0334	1.69491	3	11.8025	0.278273	3	9.31466	0.259606	3	8.29221	0.499257	3	6.39358	0.390894	3	6.51856
	9.86395	94.6811	27.2888	11.2507	8.95455	7.40518	5.62007	4.98554	4.7862		92.3077	30.7989	11.9738	9.72483	9.35515	6.84494	6.32935	6.41906		94.4602	25.7639	12.197	9.37115	8.21086	6.61594	7.30627	9.1654			9.86395	93.6063	0.659941	3	27.9641	1.4877	3	11.8564	0.237824	3	9.28018	0.28661	3	8.33878	0.55358	3	6.31903	0.416688	3	6.13332
	9.93337	94.0509	27.3295	11.3986	8.74456	7.45033	5.49621	4.76434	4.36389		93.6375	30.8559	11.806	9.56848	8.89454	6.50858	6.10195	5.97497		94.2545	25.5972	11.9545	9.29408	8.22684	6.51671	6.95572	8.6128			9.93337	94.7288	0.802806	3	27.8144	1.57303	3	11.7296	0.156689	3	9.22237	0.22342	3	8.19057	0.4173	3	6.20479	0.307856	3	5.90664
	10.0025	96.2944	26.9899	11.4281	8.80456	7.45033	5.5891	4.66224	4.13514		92.4511	31.2696	11.8517	9.59975	9.29161	6.37403	6.10195	5.53088		92.2494	25.5972	11.8939	8.92417	8.30671	6.31823	6.71587	8.26982			10.0025	92.518	0.17759	3	28.0473	1.68237	3	11.6605	0.212643	3	9.08949	0.260343	3	8.29938	0.574993	3	6.07314	0.273461	3	5.73027
	10.0717	92.8535	27.2752	11.236	8.74456	7.29982	5.52717	4.37298	4.01197		90.7823	31.0842	11.7755	9.72483	9.05337	6.32358	5.8935	5.3694		93.4319	25.9861	12.0455	9.4328	8.29073	6.28515	6.36531	7.88872			10.0717	92.7088	0.973201	3	28.165	1.51752	3	11.7595	0.16985	3	9.37573	0.219889	3	8.20962	0.512159	3	6.00401	0.300555	3	5.5496
	10.1406	93.9123	27.4246	11.4577	8.96955	7.28477	5.40331	4.38999	3.81841		92.751	30.5991	11.7907	9.78737	9.10102	6.3404	5.91245	5.16754		92.4679	25.8889	12.1667	9.27867	8.24281	6.30169	6.18081	7.66006			10.1406	93.3084	0.70373	3	27.835	1.4199	3	11.7804	0.226054	3	9.3502	0.234496	3	8.32994	0.422282	3	6.05642	0.26486	3	5.48875
	10.21	94.7063	27.0171	11.3838	8.98455	7.646	5.52717	4.37298	3.67764		90.8214	31.0128	12.1263	9.86554	9.18043	6.28994	5.9314	4.98587		93.072	25.9028	12.1667	9.29408	8.14696	6.38439	5.81181	7.45046			10.21	92.5935	0.916758	3	28.1994	1.4976	3	11.9218	0.224964	3	9.34139	0.289926	3	8.29938	0.470885	3	6.08265	0.255972	3	5.28698
initial velocity		1.36221	5.53104	5.69371	6.05054	8.31679	14.2348	24.0235	34.1784		0.793859	2.59495	5.63056	6.4497	5.98397	12.3268	20.0915	30.4199		2.10333	4.61953	4.80885	7.17942	6.80867	13.7343	23.8866	31.8194
normalized initial velocity		0	4.16883	4.3315	4.68833	6.95458	12.8726	22.6613	32.8162		0	1.80109	4.8367	5.65584	5.19011	11.5329	19.2977	29.626		0	2.5162	2.70551	5.07609	4.70534	11.6309	21.7832	29.716
RAW DATA
	Time norm (min)	0	1	5	10	25	50	200	400		0	1	5	10	25	50	200	400		0	1	5	10	25	50	200	400
	-7.47817	9472	9015	9221	9338	9599	9454	9303	10299		9329	8912	9197	8882	9027	9106	9205	9590		9047	9249	9211	9180	9267	9380	9504	9947
	-7.40892	9125	8716	9096	9260	9412	9435	9286	10145		8968	8763	8953	8427	8952	8917	9016	9352		8757	9056	9116	9074	9137	9214	9310	9497
	-7.33973	9061	8678	8957	9201	9370	9304	8983	10000		8659	8419	8850	8416	8834	8780	9160	9344		8679	8915	8869	8880	8928	9070	9304	9343
	-7.27057	8934	8654	8885	9109	9140	9078	8928	9937		8587	8414	8819	8231	8732	8644	8929	9078		8625	8916	8836	8819	8781	8906	9100	9263
	-7.20142	8784	8519	8735	9051	9041	9015	8821	9783		8536	8173	8570	8286	8720	8687	8894	9020		8586	8840	8773	8676	8767	8951	9029	9064
	-7.13225	8769	8453	8640	8733	9028	8929	8676	9708		8385	8085	8591	8284	8565	8500	8718	8959		8468	8758	8672	8547	8733	8799	8823	9057
	-7.06335	8574	8301	8516	8728	8877	8682	8582	9493		8418	8003	8441	8290	8498	8450	8759	8791		8489	8702	8497	8410	8612	8765	8900	8944
	-6.99392	8435	8185	8388	8548	8708	8615	8459	9413		8392	7956	8377	8098	8368	8304	8549	8765		8241	8604	8552	8488	8445	8667	8752	8983
	-6.92475	8375	8239	8243	8530	8678	8601	8427	9395		8172	7975	8268	8018	8250	8157	8363	8635		8334	8509	8515	8413	8365	8555	8659	8904
	-6.8556	8456	8044	8259	8295	8531	8471	8317	9266		8083	7948	8087	7915	8073	8158	8352	8592		8291	8453	8270	8406	8475	8449	8502	8789
	-6.78668	8329	8080	8202	8327	8298	8340	8183	9118		8231	7856	8055	7922	8048	8079	8201	8427		8127	8409	8281	8300	8273	8371	8568	8898
	-6.71728	8216	7953	8112	8274	8350	8314	8180	9030		8023	7996	7890	7832	8022	8027	8190	8344		8145	8298	8229	8191	8210	8211	8477	8804
	-6.64812	8131	7960	8076	8205	8255	8244	8138	8969		8060	7765	8046	7925	8028	7927	8053	8347		8077	8228	8179	8078	8166	8460	8498	8850
	-6.57893	8028	7964	8025	8186	8239	8214	8121	8863		7997	7788	7869	7922	7952	7912	8042	8172		8025	8107	8128	8039	8144	8244	8407	8853
	-6.51003	8184	7856	7962	8091	8108	8184	8153	8884		7786	7712	7890	8016	7830	7835	8090	8218		7982	8202	7989	8067	8092	8198	8370	8721
	-6.4406	8027	7847	7922	8066	8197	8146	8080	8783		7857	7774	7866	7695	7792	7845	7957	8085		7983	8006	8075	8041	8065	8024	8240	8680
	-6.37145	8026	7798	7972	8107	8133	8167	7989	8639		7899	7651	7765	7689	7821	7711	7953	7978		7961	8133	7968	8000	7994	8047	8199	8801
	-6.30255	8079	7778	7832	7985	8045	8033	8031	8676		7832	7667	7658	7559	7733	7711	7834	7953		7953	8065	7983	7899	7996	7999	8091	8750
	-6.23312	7994	7794	7816	8003	8004	8059	7977	8684		7895	7603	7771	7584	7587	7708	7795	7969		7807	8020	8005	7850	7940	7947	8153	8563
	-6.16395	7861	7735	7719	7894	8003	7983	7935	8491		7715	7563	7643	7620	7541	7699	7875	7910		7779	7980	7933	7837	7950	7866	7960	8618
	-6.0948	7860	7768	7780	7921	7984	8007	8014	8539		7905	7561	7620	7624	7609	7673	7761	7856		7833	7953	7840	7793	7909	7842	7901	8539
	-6.02588	7780	7721	7695	7878	7985	8046	7943	8530		7734	7491	7673	7892	7570	7642	7686	7931		7836	7937	7833	7810	7804	7820	7932	8502
	-5.95645	7863	7657	7737	7876	8001	7988	8009	8562		7693	7490	7649	7783	7534	7679	7794	7927		7837	7929	7843	7772	7716	7826	7965	8441
	-5.8873	7687	7711	7703	7850	8117	7937	7976	8558		7711	7459	7597	7760	7543	7611	7675	7877		7799	7878	7861	7810	7749	7762	8004	8493
	-5.81813	7596	7743	7742	7802	8058	7932	8017	8527		7691	7437	7590	7558	7535	7569	7790	7808		7768	7868	7835	7700	7770	7669	7943	8547
	-5.74923	7493	7656	7670	7894	7865	7955	7969	8494		7624	7479	7578	7487	7521	7581	7746	7797		7704	7871	7753	7745	7874	7679	7782	8465
	-5.6798	7828	7676	7759	7775	7957	7847	7914	8536		7569	7486	7578	7480	7524	7559	7648	7807		7721	7847	7658	7755	7739	7692	7848	8439
	-5.61063	7635	7670	7705	7811	7904	7925	8009	8453		7610	7373	7567	7438	7561	7567	7549	7874		7682	7799	7707	7739	7707	7650	7760	8431
	-5.54148	7479	7677	7588	7790	7873	7904	7946	8499		7548	7450	7535	7376	7475	7581	7708	7826		7718	7860	7728	7698	7693	7698	7917	8352
	-5.47257	7560	7695	7551	7733	7965	7944	7946	8413		7511	7417	7523	7394	7437	7484	7562	7789		7642	7767	7703	7655	7711	7599	7793	8353
	-5.4034	7485	7571	7526	7732	7852	7864	7903	8327		7517	7493	7455	7366	7442	7560	7576	7815		7707	7708	7695	7663	7672	7636	7705	8426
	-5.33425	7460	7669	7506	7681	7960	7884	7825	8338		7550	7421	7469	7331	7390	7505	7568	7731		7633	7754	7659	7609	7680	7649	7771	8390
	-5.26508	7500	7585	7465	7629	7827	7886	7938	8413		7470	7451	7448	7310	7408	7420	7467	7760		7618	7747	7644	7638	7589	7585	7728	8320
	-5.19618	7611	7642	7565	7708	7888	7791	7749	8383		7452	7418	7434	7525	7503	7478	7516	7821		7636	7722	7548	7640	7617	7538	7695	8377
	-5.12675	7422	7622	7452	7701	7783	7764	7772	8270		7419	7404	7380	7372	7373	7394	7511	7683		7528	7701	7669	7623	7605	7485	7696	8346
	-5.0576	7479	7651	7489	7543	7843	7781	7801	8193		7502	7505	7385	7259	7454	7410	7449	7732		7599	7632	7547	7581	7523	7464	7636	8263
	-4.9887	7531	7536	7500	7604	7820	7856	7728	8174		7380	7361	7364	7220	7401	7432	7498	7679		7591	7657	7559	7554	7564	7462	7696	8347
	-4.91925	7613	7513	7442	7594	7669	7694	7726	8242		7443	7429	7314	7250	7336	7346	7378	7656		7526	7705	7558	7472	7483	7464	7544	8378
	-4.85012	7436	7548	7390	7491	7697	7686	7669	8174		7446	7367	7266	7179	7308	7440	7366	7641		7558	7675	7536	7445	7546	7489	7610	8312
	-4.7812	7438	7505	7391	7472	7779	7678	7654	8197		7455	7392	7303	7222	7322	7405	7470	7646		7637	7614	7398	7447	7518	7499	7584	8349
	-4.71203	7424	7486	7380	7631	7687	7604	7714	8031		7384	7379	7242	7274	7314	7326	7432	7713		7478	7585	7512	7503	7517	7359	7574	8362
	-4.6426	7621	7530	7346	7445	7703	7709	7727	8090		7432	7326	7343	7179	7273	7300	7312	7571		7496	7554	7475	7425	7534	7370	7491	8251
	-4.57318	7363	7530	7412	7418	7656	7648	7641	8112		7378	7314	7278	7182	7328	7257	7353	7526		7544	7543	7359	7405	7425	7365	7539	8168
	-4.50403	7642	7488	7366	7451	7683	7601	7648	8040		7358	7259	7354	7205	7329	7227	7399	7582		7534	7639	7427	7385	7462	7355	7499	8255
	-4.43512	7556	7470	7327	7339	7660	7603	7637	8063		7463	7291	7249	7175	7310	7272	7310	7547		7419	7592	7415	7434	7368	7290	7452	8303
	-4.36568	7544	7450	7245	7466	7556	7527	7610	7995		7391	7300	7298	7204	7317	7260	7339	7490		7485	7592	7390	7345	7441	7317	7469	8221
	-4.29652	7418	7410	7293	7344	7612	7621	7577	8078		7278	7375	7313	7271	7250	7240	7314	7517		7555	7582	7413	7310	7395	7348	7473	8178
	-4.22762	7368	7459	7235	7357	7623	7559	7567	7980		7332	7261	7234	7144	7263	7249	7246	7480		7482	7494	7369	7381	7406	7234	7488	8182
	-4.1582	7468	7491	7246	7336	7592	7526	7556	7957		7292	7285	7179	7173	7247	7218	7297	7491		7522	7637	7337	7332	7393	7292	7481	8177
	-4.08903	7386	7358	7282	7278	7547	7538	7499	7944		7237	7241	7160	7158	7232	7183	7258	7524		7514	7520	7362	7345	7371	7258	7354	8228
	-4.01987	7375	7526	7244	7300	7519	7484	7567	7947		7305	7244	7201	7130	7235	7263	7277	7547		7475	7561	7364	7254	7299	7281	7359	8158
	-3.95097	7312	7381	7236	7287	7564	7575	7486	7898		7386	7254	7210	7139	7221	7157	7304	7463		7576	7485	7321	7253	7294	7269	7390	8185
	-3.88153	7486	7282	7146	7294	7549	7404	7494	7995		7345	7216	7188	7198	7251	7165	7246	7470		7363	7483	7380	7382	7285	7192	7374	8102
	-3.81237	7353	7305	7232	7284	7449	7468	7496	7906		7351	7184	7128	7179	7207	7228	7209	7358		7480	7531	7296	7265	7323	7247	7399	8152
	-3.7432	7350	7362	7241	7315	7454	7486	7504	7873		7317	7204	7235	7254	7302	7163	7202	7461		7453	7618	7339	7302	7400	7207	7358	8211
	-3.6743	7506	7392	7259	7261	7486	7397	7455	7841		7259	7156	7145	7134	7292	7209	7253	7496		7457	7549	7240	7307	7337	7235	7312	8063
	-3.60488	7420	7281	7262	7300	7414	7497	7424	7807		7355	7264	7126	7106	7156	7154	7284	7424		7414	7469	7343	7197	7279	7220	7299	8134
	-3.53572	7318	7339	7190	7218	7431	7427	7493	7870		7282	7126	7224	7230	7125	7114	7269	7460		7401	7553	7299	7323	7283	7259	7330	8133
	-3.46682	7341	7260	7150	7150	7391	7522	7446	7831		7245	7201	7178	7113	7179	7112	7201	7557		7387	7513	7218	7245	7295	7209	7302	8028
	-2.4011	9140	9117	9161	9303	9341	9317	9513	9995		7047	7014	7211	7116	7237	7124	7195	7355		7263	7361	7171	7143	7302	7180	7159	7743
	-2.33218	9136	9058	9200	9324	9301	9474	9444	9842		7030	7062	7101	6997	7241	7099	7135	7236		7146	7261	7181	7074	7249	7116	7160	7748
	-2.26302	9215	9132	9127	9185	9236	9400	9418	9864		7013	6939	7174	7069	7312	7110	7225	7294		7133	7354	7135	7044	7278	7033	7224	7748
	-2.1936	9095	8984	9028	9191	9173	9299	9356	9809		7045	6987	7240	7108	7176	7061	7187	7251		7081	7272	7137	7070	7190	6990	7148	7773
	-2.12468	9069	9086	9054	9161	9128	9283	9280	9766		7103	6961	7082	6988	7187	7100	7052	7281		7070	7255	7067	6950	7086	6967	7091	7724
	-2.05578	9118	9051	9028	9129	9125	9329	9321	9753		7092	7037	7028	6993	7241	7098	7048	7250		7087	7251	7067	7018	7155	6960	7064	7762
	-1.98637	9037	9035	8958	9094	9074	9268	9213	9691		6998	6948	7044	6977	7230	7015	7159	7257		7099	7215	7136	6976	7083	6930	7221	7750
	-1.91718	9143	9011	8915	9031	9082	9175	9387	9728		6974	6954	7052	6938	7167	7005	7018	7277		7058	7206	7086	6986	7041	6988	7063	7700
	-1.84828	8998	9006	8956	9069	9100	9322	9365	9656		6992	6987	6987	6950	7139	6957	7068	7202		7053	7196	7070	7053	7088	6924	7107	7681
	-1.77887	9225	9033	8944	9048	9103	9331	9339	9690		7016	6985	6991	6887	7152	7016	7024	7156		7026	7181	7040	6954	7042	6922	7057	7684
	-1.7097	9055	9080	8935	9066	9139	9246	9270	9664		6950	6908	6937	6920	7093	6994	6992	7218		7024	7178	7016	6929	7040	6922	7037	7666
	-1.64053	9094	8999	9021	9032	9138	9217	9129	9705		7030	7060	6951	6909	7083	6875	6958	7182		7084	7134	7014	6901	6997	6878	7030	7642
	-1.57138	9005	9019	9052	8968	9121	9152	9276	9546		6993	6969	6937	6861	7039	6945	6963	7190		6955	7186	6993	6938	7017	6841	7022	7626
	-1.50195	9041	9010	9060	8957	9078	9297	9273	9676		7061	6931	6897	6824	7114	6984	6924	7172		7096	7153	7000	6893	7051	6828	7002	7712
	-1.43278	8885	8916	8996	9096	9081	9121	9290	9725		6941	6862	6850	6809	7002	6928	6891	7140		7031	7093	6993	6870	6965	6861	7015	7591
	-1.36362	8866	8975	9022	8958	9001	9189	9185	9639		6903	6942	6868	6775	6990	6858	6952	7185		7059	7214	6900	6852	6988	6750	6932	7574
	-1.29472	8977	8993	8965	9003	9062	9120	9260	9548		6913	6979	6904	6772	6959	6838	6903	7137		6941	7141	6979	6857	7009	6839	6959	7549
	-1.2253	8827	9072	8980	8935	8984	9090	9254	9558		6821	6927	6819	6880	7002	6924	6912	7080		7073	7131	6979	6863	7028	6841	6992	7543
	-1.15613	8871	8896	8928	8975	9038	9175	9176	9631		6963	6984	6885	6801	6977	6828	6919	7056		7015	7201	6972	6775	6943	6904	6928	7701
	-1.08722	8906	8934	8865	8925	9048	9044	9118	9571		6912	6925	6811	6840	6990	6846	6879	7085		6953	7156	6917	6819	6978	6823	6935	7661
	0	7934	7362	6764	6667	6644	6459	5877	5683		7670	7010	6556	6396	6296	5946	5277	4954		7780	7200	6600	6488	6260	6046	5420	5248
	0.0689167	8067	7245	6755	6576	6506	6305	5770	5486		7870	7097	6421	6299	6355	5858	5197	4828		7729	7151	6544	6329	6219	5820	5387	4963
	0.138333	7976	7274	6704	6470	6455	6176	5580	5217		7787	6990	6404	6226	6253	5747	5089	4648		7741	7074	6511	6343	6096	5807	5231	4801
	0.207517	7839	7120	6637	6540	6385	6131	5377	4994		7754	6903	6392	6252	6243	5686	4979	4491		7769	7105	6421	6292	6057	5729	5083	4654
	0.2764	7836	7164	6603	6417	6353	6024	5324	4783		7728	6990	6340	6218	6233	5607	4905	4348		7740	7089	6423	6225	6007	5696	4988	4492
	0.345833	7824	7159	6593	6366	6316	5987	5251	4668		7713	6948	6325	6165	6223	5621	4843	4175		7792	6998	6363	6199	6003	5612	4841	4321
	0.415	7765	7100	6531	6415	6300	5902	5010	4438		7825	6841	6436	6158	6174	5524	4730	4086		7739	7036	6420	6201	6012	5536	4750	4197
	0.484167	7743	7042	6574	6285	6198	5917	4960	4316		7672	6832	6299	6234	6097	5491	4624	3963		7773	6928	6383	6149	5889	5472	4662	4049
	0.553067	7757	6974	6480	6267	6168	5721	4831	4151		7722	6779	6226	6215	6154	5478	4571	3893		7694	6990	6351	6133	5897	5382	4614	3931
	0.622483	7677	6928	6448	6261	6156	5732	4750	4047		7795	6900	6233	6334	6036	5416	4488	3761		7712	6995	6300	6108	5824	5390	4544	3815
	0.69165	7702	7008	6452	6294	6164	5646	4688	3977		7581	6825	6250	6050	6035	5267	4427	3683		7673	6897	6314	6072	5825	5348	4392	3654
	0.760867	7774	7013	6464	6218	6105	5662	4614	3818		7571	6821	6236	6030	5980	5266	4306	3537		7609	6917	6235	6064	5790	5241	4332	3675
	0.829717	7755	6915	6445	6271	6085	5607	4535	3731		7632	6823	6133	5961	5991	5263	4264	3490		7605	6816	6220	6066	5805	5188	4243	3578
	0.89915	7791	6922	6519	6216	6101	5516	4463	3658		7591	6797	6183	5955	5948	5211	4196	3400		7609	6871	6298	6038	5808	5190	4186	3498
	0.9683	7729	6947	6397	6196	6090	5537	4312	3563		7561	6743	6211	5908	5899	5180	4157	3351		7646	6858	6156	5985	5686	5119	4083	3401
	1.03722	7741	6964	6357	6146	5985	5492	4326	3483		7629	6754	6100	6351	5949	5204	4066	3260		7668	6866	6190	5979	5727	5128	4042	3343
	1.10663	7762	6979	6376	6119	5995	5409	4278	3358		7623	6682	6149	5892	5937	5096	4038	3217		7616	6850	6135	5910	5737	5085	3993	3284
	1.17578	7753	6876	6274	6108	5856	5302	4156	3261		7631	6689	6134	6120	5856	5091	3965	3113		7574	6857	6249	5875	5655	4995	3811	3163
	1.24497	7788	6858	6320	6061	5879	5270	4090	3248		7582	6722	6171	5898	5846	5074	3893	3100		7649	6765	6177	5920	5644	4988	3781	3045
	1.31387	7792	6827	6258	6137	5918	5251	4022	3131		7590	6771	6071	5854	5801	4983	3884	2974		7565	6763	6183	5876	5700	4955	3719	3054
	1.3833	7682	6882	6221	5992	5822	5185	3932	3090		7512	6681	6042	5842	5795	4947	3866	2943		7710	6781	6185	5880	5601	4958	3650	2980
	1.45245	7654	6895	6311	6027	5775	5208	3892	3060		7442	6678	6063	5827	5804	4888	3758	2913		7628	6826	6105	5850	5594	4829	3617	2933
	1.52137	7703	6821	6298	5987	5769	5086	3813	2899		7509	6634	6036	5814	5848	4910	3743	2841		7550	6794	6188	5860	5584	4810	3613	2865
	1.59078	7684	6829	6299	5978	5724	5018	3793	2905		7560	6767	6050	5797	5778	4863	3720	2781		7656	6749	6106	5849	5526	4819	3532	2751
	1.65993	7659	6844	6248	5947	5807	4973	3723	2845		7428	6626	6064	5813	5776	4803	3659	2795		7556	6769	6072	5826	5578	4740	3492	2768
	1.72915	7715	6899	6265	5964	5788	4990	3677	2778		7514	6701	6060	5787	5658	4733	3632	2675		7507	6795	6026	5787	5542	4730	3480	2734
	1.79828	7608	6950	6215	5886	5671	4936	3634	2731		7488	6635	5933	5767	5670	4753	3565	2675		7618	6812	5994	5776	5429	4732	3423	2662
	1.86743	7778	6811	6139	5904	5644	4934	3585	2698		7463	6617	5990	5728	5797	4791	3511	2641		7585	6735	6043	5721	5544	4744	3356	2638
	1.93662	7689	6839	6145	5861	5648	4854	3544	2661		7411	6726	5927	5681	5653	4633	3473	2576		7533	6765	6002	5712	5415	4630	3360	2620
	2.00552	7682	6758	6141	5851	5585	4861	3412	2602		7532	6719	5963	5773	5611	4643	3461	2536		7478	6781	5992	5734	5440	4616	3279	2591
	2.07493	7675	6707	6117	5880	5613	4795	3428	2543		7564	6678	5982	5731	5694	4604	3423	2498		7554	6698	6021	5706	5386	4573	3271	2565
	2.1441	7666	6756	6121	5810	5587	4769	3371	2487		7503	6587	5983	5692	5694	4624	3342	2459		7635	6731	5970	5677	5456	4561	3224	2550
	2.21298	7703	6795	6131	5826	5547	4724	3317	2518		7392	6648	5957	5697	5623	4605	3344	2409		7481	6737	5960	5717	5381	4531	3203	2411
	2.28243	7689	6752	6107	5788	5499	4687	3251	2432		7503	6699	5897	5600	5549	4590	3275	2399		7637	6669	5966	5666	5407	4497	3168	2414
	2.35158	7699	6768	6096	5759	5510	4655	3210	2383		7472	6594	5964	5655	5606	4547	3284	2369		7519	6664	5952	5641	5387	4512	3086	2380
	2.42075	7639	6731	6088	5708	5420	4621	3186	2349		7392	6594	5932	5645	5513	4491	3258	2324		7514	6658	5917	5734	5293	4398	3098	2358
	2.48965	7667	6732	5998	5630	5459	4624	3168	2364		7390	6735	5879	5706	5640	4450	3203	2252		7508	6753	5954	5652	5384	4356	3087	2371
	2.55908	7660	6665	6015	5689	5472	4571	3110	2307		7479	6597	5913	5707	5563	4488	3163	2263		7576	6722	5902	5575	5247	4349	3029	2275
	2.62823	7611	6763	6047	5737	5426	4538	3135	2268		7395	6609	5871	5552	5533	4404	3107	2246		7549	6606	5975	5687	5263	4390	3014	2284
	2.6974	7723	6835	6080	5700	5426	4497	3027	2210		7394	6640	5845	5576	5583	4411	3111	2195		7409	6658	5832	5606	5198	4322	2944	2254
	2.76658	7757	6770	5971	5705	5374	4461	3033	2225		7435	6581	5847	5551	5516	4383	3054	2169		7480	6600	5899	5571	5188	4266	2954	2252
	2.83573	7646	6731	5985	5695	5393	4418	2981	2195		7402	6558	5771	5509	5526	4321	3056	2155		7405	6593	5927	5571	5182	4209	2923	2168
	2.9049	7770	6713	5940	5637	5339	4425	2976	2157		7413	6626	5791	5547	5502	4325	3030	2129		7499	6688	5814	5530	5154	4258	2856	2143
	2.9738	7770	6731	5991	5582	5341	4384	2929	2127		7538	6613	5788	5521	5503	4303	2979	2114		7443	6626	5827	5517	5159	4190	2848	2158
	3.04322	7625	6648	5939	5565	5335	4339	2912	2079		7461	6583	5788	5525	5481	4275	2972	2096		7457	6587	5891	5506	5100	4180	2814	2127
	3.1124	7622	6667	5925	5609	5231	4333	2922	2080		7415	6610	5811	5464	5444	4245	2925	2051		7445	6572	5842	5479	5152	4175	2801	2078
	3.18155	7627	6688	5983	5592	5290	4289	2849	2059		7420	6541	5822	5437	5430	4258	2907	2044		7486	6628	5757	5508	5119	4163	2760	2001
	3.25072	7666	6601	5900	5548	5221	4317	2843	2041		7367	6571	5797	5493	5448	4201	2884	2020		7412	6573	5827	5508	5088	4099	2742	2067
	3.31988	7594	6665	5958	5593	5231	4224	2815	1989		7360	6552	5794	5380	5385	4147	2849	1963		7396	6606	5731	5475	5020	4077	2736	2092
	3.3888	7676	6658	5923	5501	5256	4229	2770	1991		7389	6541	5752	5391	5402	4128	2834	1981		7405	6645	5796	5478	4996	4110	2707	2010
	3.45822	7757	6641	5920	5486	5251	4204	2739	1954		7341	6572	5804	5454	5408	4145	2819	1948		7425	6529	5781	5473	5005	4039	2675	2017
	3.52738	7640	6778	5864	5518	5139	4177	2728	1922		7400	6550	5794	5379	5361	4157	2766	1923		7447	6542	5816	5364	5015	4045	2680	1956
	3.59653	7594	6613	5861	5522	5152	4143	2694	1920		7510	6578	5715	5461	5305	4082	2767	1913		7487	6638	5751	5435	5022	3968	2631	1979
	3.6657	7657	6681	5925	5476	5145	4169	2681	1907		7333	6672	5747	5416	5348	4040	2778	1869		7404	6543	5759	5365	4980	3998	2615	1957
	3.73487	7672	6633	5907	5512	5105	4095	2624	1902		7338	6486	5763	5341	5364	4016	2704	1889		7417	6574	5736	5401	4924	3995	2596	1872
	3.80377	7612	6655	5903	5429	5139	4089	2659	1868		7366	6567	5654	5350	5278	4057	2690	1824		7484	6545	5778	5376	4903	3936	2631	1893
	3.87293	7616	6621	5855	5352	5100	4081	2625	1830		7406	6550	5689	5315	5276	3961	2664	1813		7411	6562	5741	5349	4976	3976	2577	1916
	3.94235	7614	6693	5780	5485	5052	4049	2578	1841		7380	6501	5689	5298	5252	3991	2628	1806		7383	6634	5718	5335	4901	3944	2563	1877
	4.01153	7598	6715	5829	5450	5080	4037	2569	1814		7361	6452	5643	5343	5213	3969	2613	1811		7395	6511	5710	5309	4879	3899	2521	1864
	4.08043	7589	6753	5764	5376	5075	3971	2571	1810		7315	6478	5654	5226	5193	3917	2597	1797		7370	6512	5702	5338	4886	3872	2499	1859
	4.14985	7698	6514	5818	5356	5063	4008	2519	1784		7395	6544	5579	5250	5184	3982	2578	1777		7445	6491	5759	5305	4890	3852	2477	1791
	4.21902	7643	6645	5864	5393	5027	3992	2502	1774		7340	6503	5698	5321	5167	3885	2548	1749		7408	6471	5632	5254	4855	3897	2443	1832
	4.28818	7667	6617	5820	5328	5045	3951	2503	1774		7275	6510	5610	5276	5251	3860	2531	1778		7366	6480	5672	5372	4814	3762	2455	1805
	4.35708	7657	6582	5831	5341	5000	3962	2468	1735		7281	6549	5570	5293	5208	3896	2512	1734		7401	6571	5657	5297	4780	3807	2424	1786
	4.42677	7611	6570	5860	5394	5007	3896	2461	1773		7282	6492	5549	5238	5118	3867	2531	1709		7397	6493	5691	5204	4860	3721	2391	1804
	4.49593	7673	6620	5765	5336	4945	3874	2427	1726		7234	6505	5633	5261	5185	3843	2498	1704		7413	6454	5686	5227	4755	3710	2374	1814
	4.56485	7633	6677	5771	5330	4954	3909	2377	1689		7280	6471	5558	5213	5115	3837	2466	1719		7283	6474	5640	5228	4761	3736	2375	1765
	4.63427	7551	6652	5821	5363	4951	3847	2414	1717		7343	6424	5582	5196	5208	3805	2481	1688		7394	6454	5643	5248	4751	3708	2326	1719
	4.70342	7570	6537	5757	5271	4944	3805	2380	1682		7339	6493	5617	5199	5146	3807	2439	1682		7373	6499	5678	5302	4749	3715	2356	1700
	4.77233	7578	6673	5793	5296	4937	3789	2388	1676		7273	6457	5580	5120	5134	3804	2440	1645		7391	6498	5665	5180	4727	3681	2308	1695
	4.84175	7660	6628	5759	5292	4954	3830	2348	1669		7276	6513	5623	5166	5099	3717	2417	1650		7363	6493	5651	5184	4716	3619	2316	1688
	4.91092	7661	6537	5755	5217	4931	3812	2307	1650		7257	6499	5494	5145	5132	3710	2385	1647		7309	6469	5673	5174	4677	3666	2273	1676
	4.98033	7447	6599	5762	5228	4884	3810	2298	1632		7218	6455	5592	5109	5114	3705	2371	1630		7334	6441	5619	5192	4726	3647	2300	1685
	5.04925	7539	6579	5783	5201	4830	3764	2318	1616		7257	6413	5491	5103	5044	3656	2362	1616		7343	6446	5705	5153	4676	3607	2276	1676
	5.11867	7568	6521	5711	5206	4896	3739	2265	1622		7269	6520	5599	5151	5116	3704	2387	1603		7434	6495	5569	5119	4660	3597	2259	1643
	5.18783	7624	6611	5712	5255	4827	3720	2277	1607		7274	6442	5541	5109	5082	3661	2329	1585		7377	6415	5584	5172	4680	3565	2223	1626
	5.25673	7531	6549	5699	5255	4845	3673	2261	1602		7311	6394	5524	5174	4989	3650	2306	1575		7356	6412	5667	5124	4663	3606	2209	1592
	5.3259	7565	6559	5737	5183	4818	3695	2221	1585		7317	6446	5519	5140	5011	3619	2298	1541		7207	6384	5610	5166	4609	3527	2210	1629
	5.39532	7577	6545	5759	5237	4817	3658	2242	1561		7343	6444	5529	5118	4969	3602	2305	1557		7372	6399	5557	5159	4559	3566	2204	1635
	5.46423	7572	6529	5681	5203	4821	3656	2226	1561		7213	6441	5544	5142	4983	3586	2277	1544		7301	6382	5576	5133	4571	3497	2188	1603
	5.53365	7483	6532	5681	5144	4761	3657	2196	1553		7264	6405	5484	5011	5053	3570	2247	1532		7294	6387	5610	5056	4563	3473	2163	1588
	5.60282	7530	6554	5741	5188	4739	3633	2199	1561		7200	6461	5507	5032	4940	3563	2268	1515		7221	6423	5586	5094	4580	3480	2149	1588
	5.67172	7463	6574	5691	5175	4750	3601	2181	1539		7233	6388	5419	5062	4987	3528	2202	1525		7231	6345	5574	5051	4589	3512	2128	1546
	5.74115	7518	6541	5658	5140	4744	3599	2148	1525		7318	6431	5512	5076	4932	3522	2264	1503		7291	6346	5562	5078	4594	3493	2148	1556
	5.81032	7546	6546	5646	5096	4785	3579	2135	1501		7201	6433	5536	5023	4969	3486	2221	1492		7289	6413	5496	5066	4543	3462	2157	1572
	5.87948	7514	6549	5679	5095	4746	3556	2149	1505		7238	6446	5459	5062	4936	3541	2205	1505		7311	6396	5523	5103	4514	3434	2093	1544
	5.94863	7617	6500	5659	5120	4774	3549	2103	1507		7259	6450	5472	5039	4922	3531	2181	1458		7335	6386	5553	5038	4563	3384	2107	1523
	6.0178	7587	6492	5637	5153	4722	3556	2105	1473		7335	6372	5496	4991	4927	3516	2178	1474		7295	6358	5489	5053	4522	3413	2092	1474
	6.08697	7563	6578	5648	5098	4707	3529	2103	1499		7302	6431	5423	5057	4924	3472	2158	1457		7314	6344	5563	5046	4490	3393	2061	1511
	6.15587	7584	6495	5633	5060	4669	3493	2116	1460		7223	6413	5525	5065	4877	3423	2164	1469		7233	6313	5462	4940	4473	3364	2060	1508
	6.2253	7485	6458	5670	5082	4715	3478	2079	1483		7345	6408	5459	5030	4917	3447	2146	1437		7248	6355	5484	5000	4476	3361	2052	1516
	6.29445	7472	6487	5587	5059	4648	3454	2077	1449		7238	6416	5461	5049	4942	3380	2144	1439		7333	6351	5488	4965	4486	3329	2058	1480
	6.36337	7611	6473	5643	5103	4633	3476	2064	1452		7252	6390	5421	5017	4885	3407	2113	1407		7291	6405	5486	5019	4445	3303	2034	1489
	6.43278	7537	6494	5597	5020	4653	3437	2032	1434		7213	6431	5413	4960	4880	3395	2111	1433		7230	6399	5503	5003	4411	3324	2009	1469
	6.50193	7541	6569	5587	5061	4628	3423	2062	1413		7345	6511	5464	4995	4925	3378	2116	1434		7242	6353	5472	4965	4405	3348	2017	1467
	6.57085	7547	6466	5572	5009	4609	3425	2029	1435		7205	6381	5417	4994	4900	3425	2100	1414		7222	6385	5432	4997	4441	3334	2011	1468
	6.64027	7531	6485	5611	5006	4627	3392	1998	1414		7140	6421	5405	4950	4880	3353	2106	1402		7239	6363	5519	4972	4407	3259	1991	1457
	6.70943	7476	6507	5602	5016	4551	3398	1981	1425		7188	6454	5463	4979	4866	3330	2060	1402		7268	6323	5484	4944	4457	3327	1972	1472
	6.7786	7487	6563	5553	5005	4599	3380	1992	1406		7078	6402	5435	4936	4862	3337	2047	1368		7254	6342	5455	4930	4408	3302	1960	1425
	6.84752	7569	6469	5699	4971	4586	3344	1993	1409		7220	6358	5376	4979	4817	3362	2082	1383		7280	6337	5517	4924	4423	3276	1953	1429
	6.91693	7513	6434	5601	4972	4570	3304	1980	1421		7279	6312	5432	4988	4849	3300	2049	1370		7318	6290	5338	5002	4339	3209	1956	1428
	6.98608	7545	6483	5554	4999	4534	3342	1984	1394		7315	6288	5375	4932	4795	3290	2035	1358		7304	6322	5360	4929	4392	3237	1945	1436
	7.055	7581	6434	5611	4903	4558	3307	1954	1381		7185	6342	5359	4934	4795	3330	2010	1354		7279	6344	5379	4911	4327	3171	1927	1397
	7.12442	7442	6525	5515	4929	4539	3326	1939	1391		7195	6378	5389	4903	4811	3316	2016	1344		7279	6333	5396	4879	4387	3164	1915	1391
	7.19358	7485	6441	5505	4946	4528	3300	1927	1362		7199	6333	5380	4877	4859	3278	1999	1342		7222	6319	5269	4874	4308	3197	1881	1392
	7.26248	7492	6513	5603	4966	4558	3266	1915	1366		7165	6345	5350	4866	4787	3262	1963	1332		7358	6354	5285	4934	4274	3204	1926	1417
	7.33192	7542	6481	5563	4889	4552	3297	1942	1373		7145	6333	5268	4856	4733	3239	1955	1307		7283	6282	5243	4868	4303	3151	1873	1417
	7.40108	7437	6460	5491	4970	4505	3314	1898	1357		7259	6351	5302	4820	4765	3257	1981	1314		7324	6284	5315	4903	4284	3140	1860	1389
	7.46998	7401	6513	5534	4896	4483	3282	1887	1363		7278	6328	5225	4856	4799	3219	2009	1309		7304	6296	5269	4856	4272	3101	1849	1363
	7.5394	7545	6517	5480	4890	4488	3268	1909	1352		7246	6346	5304	4815	4749	3218	1925	1316		7208	6281	5289	4850	4303	3101	1869	1406
	7.60857	7504	6422	5528	4914	4522	3240	1907	1329		7155	6300	5403	4877	4753	3214	1917	1314		7204	6347	5313	4837	4182	3116	1831	1368
	7.67748	7418	6408	5513	4921	4515	3207	1881	1322		7215	6373	5296	4785	4734	3204	1906	1285		7276	6346	5337	4854	4278	3120	1834	1353
	7.7469	7571	6465	5496	4845	4488	3211	1866	1326		7121	6362	5242	4786	4740	3164	1927	1296		7260	6404	5291	4833	4263	3099	1826	1374
	7.8158	7543	6486	5497	4876	4437	3198	1856	1320		7270	6264	5288	4757	4716	3156	1896	1292		7264	6314	5287	4859	4223	3045	1795	1302
	7.88548	7440	6463	5457	4875	4449	3180	1860	1320		7179	6297	5307	4863	4705	3184	1917	1272		7124	6321	5279	4823	4197	3068	1817	1311
	7.9544	7444	6436	5542	4895	4468	3147	1835	1320		7267	6244	5321	4842	4722	3164	1871	1264		7260	6339	5275	4792	4215	3080	1774	1332
	8.02382	7517	6414	5430	4912	4399	3183	1837	1300		7213	6298	5243	4809	4719	3149	1904	1250		7263	6329	5284	4796	4220	3065	1786	1314
	8.09298	7500	6471	5459	4908	4451	3157	1810	1282		7208	6326	5227	4815	4691	3141	1854	1252		7161	6295	5336	4803	4204	3039	1780	1326
	8.16188	7530	6459	5535	4871	4416	3161	1861	1285		7156	6317	5253	4760	4675	3147	1848	1245		7252	6265	5279	4782	4186	3034	1749	1299
	8.23132	7501	6366	5417	4845	4401	3147	1803	1300		7268	6312	5213	4728	4648	3106	1836	1254		7186	6275	5291	4840	4153	2982	1749	1277
	8.30047	7435	6351	5469	4820	4397	3105	1831	1289		7030	2193	779	619	598	421	382	373		7401	1838	799	618	552	450	514	585
	9.72533	7629	1992	790	591	503	394	338	351		7000	2173	784	627	572	394	364	360		7297	1849	804	601	538	433	468	522
	9.79478	7612	2012	782	597	500	375	306	312		7084	2192	796	628	575	409	358	330		7243	1839	793	595	522	404	422	499
	9.86395	7512	2009	761	597	492	363	293	272		7080	2159	785	622	589	407	334	318		7349	1855	805	608	514	400	396	481
	9.93337	7462	2012	771	583	495	355	280	248		7182	2163	774	612	560	387	322	296		7333	1843	789	603	515	394	377	452
	10.0025	7640	1987	773	587	495	361	274	235		7091	2192	777	614	585	379	322	274		7177	1843	785	579	520	382	364	434
	10.0717	7367	2008	760	583	485	357	257	228		6963	2179	772	622	570	376	311	266		7269	1871	795	612	519	380	345	414
	10.1406	7451	2019	775	598	484	349	258	217		7114	2145	773	626	573	377	312	256		7194	1864	803	602	516	381	335	402
	10.21	7514	1989	770	599	508	357	257	209		6966	2174	795	631	578	374	313	247		7241	1865	803	603	510	386	315	391
[truncated: 5 more columns]

## Sheet: Fig3B
ElenWT
Lipid to protein ratio 50
Manganese titration
		Mn2+(uM)	V (F/min)
		0	0	0	0
		1	2.5162	1.80109	4.16883
		5	2.70552	4.8367	4.3315
		10	5.07609	5.65584	4.68833
		25	4.70534	5.19011	6.95458
		50	11.6309	11.5329	12.8726
		200	21.7832	19.2977	22.6613
		400	29.716	29.626	32.8162
			Km = 119uM
			Vmax=38

## Sheet: Fig3C
ElenWT
Lipid to protein ratio 50
Manganese titration
in presence of Mg2+
NORMALIZED DATA																													Concentrations
		Concentrations Mn/Mg (uM/uM)																											mean	SEM	N
	Time (min)	0/0	50/0	50/0	50/500	50/500	50/2000	50/2000	50/2000		0/0	50/0	50/0	50/500	50/500	50/2000	50/2000	50/2000		0/0	50/0	50/0	50/500	50/2000	50/2000	50/2000		Time (min)	0 μM Mn2+/ 0 mM Mg2+			50 μM Mn2+/ 0 mM Mg2+			50 μM Mn2+/ 0.5 mM Mg2+			50 μM Mn2+/ 2 mM Mg2+
	-6.56465	129.388	161.883	159.554	156.293	159.251	155.455	158.602	154.713		124.326	161.4	159.509	160.261	160.122	160.867	154.753	166.251		122.312	153.029	153.362	149.218	153.388	131.55	136.964		-6.56465	125.342	2.10477	3	121.305	22.5924	6	157.029	2.07975	5	152.505	3.71952	9
	-6.49792	126.666	159.734	156.093	154.429	158.302	154.066	155.007	150.923		122.308	159.96	154.807	158.329	156.26	159.524	153.987	163.129		118.354	147.245	150.169	145.651	152.285	130.685	136.675		-6.49792	122.443	2.4004	3	155.691	2.34888	6	154.594	2.35031	5	150.698	3.48186	9
	-6.4311	124.071	158.113	152.685	150.393	154.729	151.841	155.544	148.202		119.515	158.269	154.842	156.832	153.312	155.204	149.243	160.688		115.53	146.117	148.371	145.369	148.961	126.863	131.037		-6.4311	119.705	2.46751	3	153.342	2.20651	6	152.127	1.98727	5	147.509	3.76273	9
	-6.36453	123.037	155.509	152.293	148.871	154.056	149.013	153.125	147.117		120.107	156.577	153.1	155.422	152.685	155.952	149.792	159.841		114.95	143.684	145.803	142.819	146.692	126.274	128.717		-6.36453	119.365	2.36368	3	151.733	2.35874	6	150.771	2.26857	5	146.28	3.82545	9
	-6.29753	122.498	152.577	151.722	148.427	153.849	150.669	151.882	144.963		119.67	157.999	152.49	153.943	152.668	154.354	147.644	156.27		113.954	142.556	144.567	140.676	145.158	124.724	128.321		-6.29753	118.707	2.5128	3	150.183	2.21514	6	149.912	2.51847	5	144.887	3.70853	9
	-6.23097	120.995	151.903	149.153	145.092	151.933	148.527	151.025	144.218		118.95	154.472	152.003	150.827	150.669	152.925	145.131	155.406		111.811	140.703	142.256	140.989	145.318	124.471	129.162		-6.23097	117.252	2.78375	3	149.084	2.68263	6	147.902	2.09939	5	144.02	3.50436	9
	-6.16427	120.173	148.188	147.154	143.382	149.31	146.637	151.663	142.468		117.285	154.4	152.229	151.784	149.128	152.007	144.781	156.403		112.114	139.961	140.555	140.535	142.17	122.68	126.373		-6.16427	116.524	2.35735	3	147.056	2.40381	6	146.828	2.09146	5	142.798	3.80449	9
	-6.09775	119.138	148.224	146.851	142.647	146.307	145.8	149.983	140.023		116.354	154.85	148.363	149.695	148.857	153.248	144.648	154.692		111.811	138.833	138.325	137.328	139.166	122.572	124.51		-6.09775	115.768	2.13524	3	146.477	2.73216	6	144.967	2.26956	5	141.627	3.84927	9
	-6.03102	116.742	147.441	144.139	140.663	144.874	144.896	145.514	138.111		114.802	151.683	146.778	147.502	148.077	149.218	140.453	152.118		108.282	135.321	136.399	136.89	140.173	119.952	125.484		-6.03102	113.275	2.55878	3	144.419	3.05871	6	143.601	2.12772	5	139.546	3.53706	9
	-5.96447	115.594	146.367	142.07	138.475	143.649	142.938	146.253	137.35		115.056	152.402	147.214	146.632	147.501	147.415	140.17	153.762		108.95	135.82	135.693	134.528	138.319	118.486	122.575		-5.96447	113.2	2.13062	3	143.068	2.62541	6	142.157	2.47568	5	138.585	3.81969	9
	-5.89783	115.098	143.872	140.41	137.209	142.855	143.357	144.775	135.682		112.939	148.209	142.529	145.936	145.062	148.81	140.786	150.689		108.194	133.725	134.489	133.964	137.504	116.635	120.988		-5.89783	112.077	2.03918	3	142.019	2.97941	6	141.005	2.3256	5	137.692	3.92794	9
	-5.8308	113.326	141.869	142.676	137.859	140.076	139.106	142.675	135.326		111.966	146.824	141.606	145.065	143.351	147.908	139.754	147.849		105.786	133.935	133.991	132.134	135.826	116.202	123.008		-5.8308	110.359	2.32004	3	140.535	2.27755	6	139.697	2.26816	5	136.406	3.55565	9
	-5.76443	114.729	141.468	139.572	136.2	139.282	138.303	140.44	133.933		111.331	146.392	141.101	142.315	142.267	145.272	138.805	147.517		105.408	133.597	134.457	130.929	134.915	115.901	120.772		-5.76443	110.489	2.72354	3	139.587	2.01817	6	138.199	2.13897	5	135.095	3.50682	9
	-5.69785	113.595	141.067	139.572	134.183	137.487	137.734	138.39	133.771		110.583	145.456	139.481	142.176	141.521	143.997	136.324	146.006		107.122	132.179	132.563	129.865	135.011	115.108	115.723		-5.69785	110.433	1.87009	3	138.812	2.24655	6	137.046	2.30539	5	133.563	3.67611	9
	-5.63103	112.489	140.302	137.913	134.439	137.849	135.542	137.114	131.082		108.932	144.754	139.742	140.453	140.437	141.378	135.891	144.644		104.248	130.793	131.777	128.692	132.502	114.159	117.755		-5.63103	108.556	2.38645	3	137.62	2.25762	6	136.374	2.21446	5	132.23	3.38196	9
	-5.56442	114.006	139.592	137.591	131.891	135.83	134.17	137.752	129.738		110.188	142.181	139.359	139.426	139.743	140.306	135.559	143.381		105.458	129.907	131.311	130.304	133.861	113.173	117.983		-5.56442	109.884	2.47226	3	137.15	2.28958	6	135.439	1.91737	5	131.769	3.35	9
	-5.4976	113.581	141.686	137.074	132.575	135.468	133.852	135.786	129.495		108.057	142.739	137.095	139.182	138.455	139.15	134.576	141.887		104.009	130.616	130.204	127.003	132.726	112.212	114.846		-5.4976	108.549	2.77421	3	136.853	2.16946	6	134.536	2.21821	5	130.503	3.42736	9
	-5.43103	111.1	138.827	135.379	131.994	135.64	132.497	134.375	130.888		107.591	140.651	134.709	137.633	138.879	137.84	133.011	140.143		101.803	129.101	130.252	127.3	131	111.971	116.865		-5.43103	106.831	2.71073	3	135.566	2.11735	6	134.289	2.09986	5	129.843	3.11341	9
	-5.36448	110.916	138.936	134.79	129.343	134.277	132.296	134.997	128.021		107.718	140.489	136.625	135.892	136.236	137.84	132.412	137.701		100.769	130.003	128.679	128.16	131.384	111.851	115.374		-5.36448	106.468	2.99517	3	134.628	1.92919	6	132.782	1.6885	5	129.097	3.11499	9
	-5.2977	110.646	137.042	135.236	130.677	133.19	130.472	133.401	127.81		105.672	140.453	135.266	134.534	134.847	136.616	131.846	139.395		102.887	127.635	128.727	127.722	131.592	113.906	115.374		-5.2977	106.402	2.26953	3	134.292	2.06233	6	132.194	1.33796	5	128.935	2.92799	9
	-5.23113	109.158	135.64	134.808	130.386	132.775	132.664	134.022	128.134		105.828	140.31	135.005	134.43	135.778	137.296	131.896	138.2		103.013	130.213	129.177	127.237	131.304	112.524	114.809		-5.23113	105.999	1.77604	3	134.26	1.67131	6	132.121	1.5165	5	128.983	3.07177	9
	-5.16432	110.377	136.533	135.004	129.48	132.827	130.639	133.165	127.729		105.362	138.33	136.05	133.664	132.119	135.238	130.065	137.718		102.609	130.97	127.957	126.22	130.984	112.248	113.643		-5.16432	106.116	2.27383	3	134.296	1.7646	6	130.862	1.35552	5	127.937	2.99984	9
	-5.09775	107.783	135.076	134.915	129.018	132.361	130.622	133.686	127.049		105.588	136.638	133.107	133.594	132.238	134.813	129.982	136.638		99.2941	128.908	128.438	125.11	129.338	111.25	114.605		-5.09775	104.222	2.54391	3	133.62	1.64258	6	130.464	1.53794	5	127.554	2.94643	9
	-5.03118	108.605	134.93	133.256	129.378	132.24	133.768	132.577	126.628		104.021	136.746	134.622	132.933	132.085	134.932	130.681	135.708		100.996	126.797	129.754	125.407	131.352	112.115	114.557		-5.03118	104.541	2.21188	3	132.414	1.46052	6	130.409	1.3896	5	128.035	2.92268	9
	-4.96435	107.698	135.84	134.951	128.215	131.981	129.869	131.082	127.243		104.177	135.883	133.716	131.906	132.983	133.282	129.549	134.562		100.819	128.585	129.931	126.596	129.898	111.454	113.68		-4.96435	104.231	1.98581	3	133.446	1.36939	6	130.336	1.23833	5	126.736	2.77634	9
	-4.8976	107.556	133.71	133.078	128.488	130.29	129.167	131.788	125.251		105.164	133.237	132.828	131.784	132.221	134.031	129.782	133.832		100.025	127.908	127.797	125.845	130.345	110.156	113.643		-4.8976	104.249	2.22166	3	132.015	1.37252	6	129.726	1.16992	5	126.444	2.89882	9
	-4.83092	107.499	133.218	133.559	128.369	130.324	129.869	130.729	126.369		104.981	134.353	132.637	131.819	130.408	131.956	128.3	132.951		101.5	127.296	128.101	125.61	130.265	109.183	110.939		-4.83092	104.66	1.73924	3	131.373	1.17049	6	129.306	1.07484	5	125.618	3.01178	9
	-4.76437	106.195	133.673	131.722	127.137	129.168	128.23	129.788	126.806		104.134	134.749	131.47	130.322	131.78	133.112	128.234	131.556		101.55	126.909	127.54	124.89	129.37	110.721	109.893		-4.76437	103.96	1.34361	3	131.139	1.29332	6	128.66	1.21006	5	125.301	2.90177	9
	-4.69753	105.571	133.6	132.15	127.223	130.273	128.765	130.712	125.332		103.274	134.587	131.313	130.566	129.392	130.442	128.117	133.001		101.828	126.813	126.192	124.343	128.635	110.156	111.864		-4.69753	103.558	1.08994	3	130.829	1.44727	6	128.359	1.16228	5	125.225	2.77866	9
	-4.63102	105.33	134.438	132.364	127.668	130.739	128.631	130.46	125.64		102.963	132.626	131.679	130.566	130.561	131.207	126.686	132.287		101.588	126.781	126.272	124.953	126.67	109.243	109.424		-4.63102	103.294	1.09281	3	130.959	1.49215	6	128.897	1.1404	5	124.472	2.95583	9
	-4.56445	104.508	132.854	131.258	126.83	129.496	128.179	128.646	125.478		102.977	133.795	131.296	129.73	129.849	130.425	127.618	131.224		101.349	126.023	125.357	123.999	127.437	108.209	108.27		-4.56445	102.945	0.912157	3	129.966	1.37602	6	127.981	1.14082	5	123.943	3.01928	9
	-4.49763	105.529	131.033	131.008	126.795	130.307	127.912	128.948	124.668		102.78	133.129	131.574	130.252	127.732	128.333	126.386	132.453		100.983	126.764	126.497	123.655	127.357	108.185	109.785		-4.49763	103.097	1.32177	3	130.065	1.16737	6	127.748	1.2346	5	123.781	2.88477	9
	-4.43107	104.65	134.074	132.31	126.488	130.117	126.908	128.73	124.441		102.455	133.129	130.582	129.33	127.918	129.966	126.386	131.888		98.4243	126.909	123.8	124.703	126.494	107.488	111.047		-4.43107	101.843	1.82302	3	130.3	1.64979	6	127.711	0.974684	5	123.705	2.8392	9
	-4.36407	103.828	131.47	130.794	126.163	129.513	126.74	129.536	125.202		102.737	131.636	130.129	127.485	127.884	129.456	126.419	127.769		98.6638	126.797	124.892	123.748	126.27	106.635	110.939		-4.36407	101.743	1.5714	3	129.611	1.26975	6	126.959	0.964329	5	123.219	2.79196	9
	-4.29768	104.721	132.216	130.812	125.616	128.184	128.665	128.511	123.648		102.328	132.356	128.37	129.904	127.986	130.051	127.252	129.131		100.756	124.799	127.588	123.702	126.83	108.486	111.215		-4.29768	102.602	1.15257	3	129.53	1.15197	6	127.078	1.08571	5	123.754	2.70638	9
	-4.23112	104.494	131.67	129.67	126.419	128.409	125.569	128.041	123.615		102.977	132.787	128.979	127.676	127.749	128.622	125.853	127.886		99.1932	123.88	124.474	122.825	126.27	108.942	107.621		-4.23112	102.221	1.57614	3	128.403	1.45823	6	126.616	1.0007	5	122.491	2.73482	9
	-4.1643	103.487	131.688	128.707	126.009	128.202	127.209	127.89	123.388		101.651	132.805	127.9	128.042	127.376	127.262	126.253	130.161		99.3193	125.588	124.763	122.622	126.814	108.257	106.587		-4.1643	101.486	1.20605	3	128.752	1.30231	6	126.45	1.03217	5	122.647	2.93908	9
	-4.09768	102.382	131.743	128.814	125.103	129.479	125.669	127.419	125.235		101.397	131.024	127.726	127.728	125.783	129.524	124.338	125.826		100.227	125.153	123.72	122.606	125.312	107.632	108.835		-4.09768	101.335	0.622775	3	128.356	1.45415	6	126.14	1.16963	5	122.199	2.68838	9
	-4.03085	102.736	131.561	128.029	125.342	128.202	125.268	127.503	122.838		102.117	132.823	128.178	127.537	126.817	128.537	125.504	127.969		98.752	124.041	123.447	121.652	126.334	107.127	106.07		-4.03085	101.202	1.23773	3	127.638	1.38456	6	125.91	1.16562	5	121.906	2.94854	9
	-3.9643	103.317	130.796	128.243	124.042	125.992	125.853	128.411	121.882		102.469	129.98	127.586	128.251	127.884	128.861	124.971	127.338		100.05	123.961	123.576	121.965	125.216	106.466	108.679		-3.9643	101.946	0.978741	3	127.929	1.49481	6	125.627	1.18391	5	121.964	2.81222	9
	-3.89778	102.991	130.395	128.653	123.358	127.459	123.661	127.419	123.631		101.044	131.51	128.352	128.233	125.699	128.724	124.305	127.387		100.088	123.687	123.56	121.23	124.72	106.959	105.818		-3.89778	101.375	0.854145	3	127.31	1.23452	6	125.196	1.29824	5	121.403	2.90265	9
	-3.83095	103.686	132.089	126.976	121.272	127.373	125.251	127.201	123.421		101.679	129.818	126.733	128.425	127.833	126.599	123.606	128.301		98.4369	123.993	122.741	121.23	123.81	106.286	106.948		-3.83095	101.267	1.52918	3	127.61	1.56004	6	125.227	1.6316	5	121.269	2.82602	9
	-3.7644	102.41	131.178	128.243	123.205	125.716	124.665	125.874	121.607		101.863	130.628	128.352	125.187	126.038	127.143	124.555	126.208		98.9159	124.557	123.447	121.183	123.794	107.127	106.491		-3.7644	101.063	1.08503	3	127.329	1.22414	6	124.266	0.914437	5	120.829	2.70172	9
	-3.69737	102.098	132.198	127.386	123.17	127.201	124.297	126.361	120.7		101.764	128.019	127.447	126.945	126.715	127.109	123.073	125.029		98.4621	122.527	123.977	121.183	125.807	105.204	107.789		-3.69737	100.775	1.1603	3	127.511	1.52471	6	125.043	1.21406	5	120.597	2.74676	9
	-3.631	101.985	131.98	127.368	121.495	125.992	122.959	126.781	122.141		102.921	129.206	126.245	126.91	123.598	127.789	122.94	125.561		98.9789	123.493	121.891	119.884	124.545	105.865	105.397		-3.631	101.295	1.18905	3	126.7	1.46095	6	123.576	1.32136	5	120.442	2.86616	9
	-3.56425	101.971	130.942	126.976	121.717	125.526	124.013	126.126	122.417		103.245	129.584	128.004	125.674	127.207	125.901	122.54	122.505		98.3487	123.558	122.372	120.854	124.001	104.591	105.962		-3.56425	101.188	1.46669	3	126.55	1.32947	6	124.196	1.23153	5	119.784	2.78162	9
	-3.49762	102.793	131.925	127.154	119.528	124.681	122.758	124.563	121.623		100.945	129.854	127.168	127.554	124.682	125.323	122.174	125.876		97.0629	123.381	122.035	119.79	123.937	103.594	104.508		-3.49762	100.267	1.68847	3	127.014	1.52443	6	123.247	1.55642	5	119.373	2.93397	9
	-3.431	102.396	129.849	127.654	121.375	124.957	123.059	124.53	122.643		100.254	128.559	127.116	126.701	126.021	125.595	121.708	123.634		97.0251	123.123	123.223	119.462	123.314	105.012	106.792		-3.431	99.8916	1.56094	3	126.812	1.23568	6	123.703	1.40256	5	119.587	2.6163	9
	-3.36418	101.007	130.268	126.762	121.631	125.216	125.033	124.614	120.554		101.326	129.206	126.106	125.727	123.598	126.769	123.156	123.817		96.7478	122.301	120.751	119.227	121.988	105.012	104.628		-3.36418	99.6936	1.47579	3	125.959	1.50343	6	123.08	1.19953	5	119.508	2.83819	9
	-3.29762	101.503	130.049	125.727	120.674	126.752	125.402	125.067	120.619		100.579	129.242	124.695	124.386	124.767	125.272	122.207	122.189		97.8192	122.929	122.115	119.227	122.307	104.219	104.592		-3.29762	99.9668	1.10643	3	126.022	1.30742	6	123.161	1.3899	5	119.097	2.83122	9
	-3.2308	102.594	129.867	126.048	120.776	124.525	120.934	126.31	120.91		101.566	129.278	126.228	124.456	126.41	125.731	122.191	122.305		97.3024	121.125	120.575	119.431	123.778	104.387	104.88		-3.2308	100.488	1.62003	3	125.259	1.60291	6	123.12	1.29791	5	119.047	2.79622	9
	-3.16428	101.262	128.975	125.62	121.204	123.939	122.39	126.21	119.339		99.9436	130.97	126.646	123.151	123.768	125.034	121.242	123.783		97.5923	123.542	120.446	118.461	121.317	104.796	105.109		-3.16428	99.5992	1.07316	3	125.681	1.36714	6	122.104	1.03231	5	118.802	2.7071	9
	-3.09772	101.162	129.339	126.298	121.529	124.232	123.26	124.664	121.105		100.325	128.037	125.009	124.874	124.428	124.762	121.492	123.883		97.9327	121.463	121.537	117.788	120.885	104.135	104.183		-3.09772	99.8066	0.967662	3	126.042	1.60042	6	122.57	1.33184	5	118.708	2.79188	9
	-3.03088	101.262	128.993	126.244	121.375	124.077	123.025	125.084	120.57		100.945	127.803	125.967	125.396	124.53	125.612	121.741	123.584		99.6092	121.785	121.666	119.039	122.707	102.825	104.628		-3.03088	100.605	0.506406	3	125.289	1.26045	6	122.883	1.17261	5	118.864	2.91002	9
	-2.96433	101.715	128.082	124.621	121.46	124.232	122.54	125	119.906		100.282	128.541	124.347	124.769	124.462	124.66	120.226	123.484		96.9368	121.399	121.361	116.865	121.301	104.459	105.409		-2.96433	99.6448	1.41576	3	124.872	1.21859	6	122.358	1.49558	5	118.554	2.64221	9
	-2.8975	101.659	127.609	125.727	119.733	124.905	122.172	123.135	120.845		100.72	127.551	122.623	124.247	124.293	125.034	120.593	123.252		96.5461	122.462	120.173	117.193	121.508	102.873	104.532		-2.8975	99.6414	1.57124	3	124.81	1.28864	6	122.074	1.53232	5	118.216	2.78332	9
	-2.83093	100.78	129.139	125.656	120.4	124.646	120.867	125.37	118.772		100.353	125.769	125.409	124.073	123.056	125.051	120.077	123.003		98.0335	122.494	120.847	118.461	122.611	103.57	104.327		-2.83093	99.722	0.853187	3	124.718	1.32617	6	122.127	1.17093	5	118.183	2.78467	9
	-2.76418	101.248	127.718	124.121	118.741	124.353	121.285	123.79	120.943		100.141	126.633	124.852	126.649	121.904	123.503	121.358	121.408		97.1637	121.64	119.772	119.024	122.036	103.197	103.089		-2.76418	99.5174	1.21942	3	124.072	1.18839	6	122.134	1.52555	5	117.846	2.79804	9
	-2.69755	101.021	127.245	126.298	120.793	122.472	121.369	123.622	120.473		100.212	129.206	122.867	123.429	121.464	124.15	120.11	124.88		93.5964	121.254	120.494	118.586	120.134	102.32	106.443		-2.69755	98.2763	2.35157	3	124.463	1.18344	6	121.349	0.822937	5	118.167	2.69365	9
	-1.828	106.819	137.862	135.29	130.797	135.157	134.655	136.778	132.216		106.505	139.14	134.413	133.264	133.237	134.66	132.212	129.314		82.1127	103.303	103.483	96.5426	113.487	89.4351	97.692		-1.828	98.4788	8.18356	3	122.002	6.25398	6	125.8	7.34691	5	122.272	5.92091	9
	-1.77437	106.876	135.968	135.718	130.694	135.968	133.333	135.87	132.475		105.926	138.564	134.848	133.716	132.272	132.687	129.865	130.593		82.869	102.868	100.562	95.9637	113.199	89.5793	95.8048		-1.77437	98.5569	7.84874	3	124.778	7.32681	6	125.723	7.49023	5	121.49	5.88414	9
	-1.72065	106.266	135.859	136.467	129.172	135.45	132.363	134.325	130.175		107.267	136.297	131.54	131.854	130.984	132.925	130.098	130.842		81.1799	102.981	102.134	96.7616	111.857	89.8197	96.3577		-1.72065	98.2375	8.53372	3	125.142	7.15992	6	124.844	7.0947	5	120.974	5.74424	9
	-1.66682	107.372	137.261	137.056	130.284	133.362	132.848	136.24	129.576		104.783	136.009	132.933	131.158	131.899	131.054	128.167	130.693		83.1842	102.884	101.075	95.9168	111.825	90.3365	96.9467		-1.66682	98.4464	7.66762	3	124.352	7.12984	6	124.524	7.16957	5	120.854	5.64626	9
	-1.61303	105.642	136.314	135.272	129.891	133.276	132.195	135.114	129.397		104.487	136.441	131.122	131.871	130.595	130.799	129.749	131.008		81.911	101.837	101.701	96.3705	111.234	88.762	97.091		-1.61303	97.3468	7.72508	3	124.011	7.05014	6	124.401	7.03126	5	120.594	5.74048	9
	-1.55923	105.826	135.021	133.577	129.224	132.862	132.363	132.779	129.576		106.392	134.137	132.724	131.175	129.544	129.728	128.833	129.115		79.4151	102.111	100.883	96.1045	111.569	88.6899	94.3142		-1.55923	97.2112	8.89955	3	123.192	6.89999	6	123.782	6.94965	5	119.663	5.74178	9
	-1.5054	105.741	137.37	135.54	127.633	133.138	131.56	134.274	129.673		105.644	134.821	130.686	130.444	129.189	131.122	129.532	129.796		79.4403	103.029	101.46	95.995	111.713	89.5673	92.7034		-1.5054	96.9419	8.75086	3	124.043	6.9248	6	123.28	6.88052	5	119.993	5.87058	9
	-1.45162	105.189	137.662	134.309	127.787	131.774	131.643	133.249	128.571		105.447	134.983	132.41	129.312	128.85	130.544	127.518	128.932		79.6294	102.095	101.637	96.1827	112.4	89.988	93.6531		-1.45162	96.7548	8.56304	3	123.535	6.9122	6	122.781	6.68168	5	119.611	5.63143	9
	-1.39778	106.11	136.605	132.953	127.086	131.619	130.89	132.981	128.215		105.559	135.181	132.062	129.574	129.273	128.844	127.884	130.676		80.6631	102.643	100.931	95.7916	112.32	90.2644	95.6966		-1.39778	97.4442	8.39207	3	123.421	6.87197	6	122.669	6.75757	5	119.752	5.45462	9
	-1.34395	105.855	135.895	133.952	126.864	133.155	129.083	131.704	127.567		104.261	134.587	130.216	129.33	129.205	128.588	126.652	128.484		80.6631	102.417	102.247	95.9481	109.811	88.2692	93.8214		-1.34395	96.9264	8.14467	3	123.626	6.75457	6	122.9	6.81318	5	118.22	5.57048	9
	-1.29012	104.31	135.786	132.774	126.813	130.169	130.572	131.838	127.211		103.951	133.831	132.497	127.554	128.799	129.303	127.152	130.41		80.3731	101.998	101.557	97.5282	110.211	89.0505	94.3142		-1.29012	96.2112	7.91972	3	122.82	6.69836	6	122.173	6.18746	5	118.896	5.59321	9
	-1.23627	105.401	136.332	132.649	126.06	129.738	130.689	131.502	127.956		104.854	133.813	128.701	128.808	128.867	129.983	125.42	128.102		80.6378	101.756	101.107	96.3235	111.282	89.6995	93.8334		-1.23627	96.9643	8.16478	3	123.029	6.85309	6	121.959	6.43866	5	118.719	5.48808	9
	-1.1824	105.741	137.152	131.597	126.009	129.824	129.652	130.343	128.053		104.896	135.271	130.721	128.86	128.884	127.789	127.385	128.7		81.2177	102.191	101.38	96.5582	110.547	89.0505	94.2782		-1.1824	97.2851	8.03742	3	122.472	6.63913	6	122.027	6.39926	5	118.422	5.45475	9
	-1.12865	105.231	135.804	132.114	126.624	129.755	128.096	131.384	127.13		104.05	134.227	131.383	128.303	127.799	130.068	127.268	128.351		81.2807	102.981	100.112	96.8554	110.323	89.363	92.8237		-1.12865	96.8538	7.79402	3	122.834	6.78636	6	121.867	6.27314	5	118.312	5.54663	9
	-1.07485	105.245	134.22	131.757	126.761	130.773	128.43	130.83	127.551		104.558	133.651	131.661	129.365	127.918	129.15	127.202	128.235		80.1966	101.547	100.61	96.5582	108.613	89.1587	92.3909		-1.07485	96.6665	8.23733	3	122.291	6.72662	6	122.275	6.46455	5	117.951	5.59526	9
	-1.02095	105.855	132.981	133.452	126.351	131.93	128.648	131.116	126.757		104.953	133.201	130.547	129.974	127.63	128.878	125.903	127.288		81.1169	101.885	100.979	97.5125	109.012	88.762	94.0498		-1.02095	97.3081	8.09982	3	122.435	6.64877	6	122.679	6.3645	5	117.824	5.44939	9
	-0.967233	104.962	135.003	130.74	126.248	129.392	128.665	131.603	126.757		105.193	134.353	130.146	128.059	128.867	129.048	126.669	126.009		80.6883	101.611	100.032	95.0876	110.371	87.8245	93.9055		-0.96723	96.9475	8.1299	3	121.856	6.68866	6	121.531	6.63227	5	117.872	5.51005	9
	-0.913367	105.146	134.201	132.864	125.633	129.876	129.652	129.956	125.769		103.767	134.407	129.45	128.703	127.969	130.153	127.002	126.873		80.7387	101.837	100.867	96.1202	108.357	88.5938	91.4894		-0.91337	96.5507	7.91603	3	122.378	6.67874	6	121.66	6.42251	5	117.538	5.65826	9
	-0.859533	105.018	133.309	132.275	126.932	128.909	128.313	130.292	127		104.487	135.793	129.833	127.885	128.257	129.473	126.253	127.005		80.3101	101.805	100.449	95.9793	108.245	88.4495	91.3211		-0.85953	96.6052	8.14899	3	121.949	6.62109	6	121.593	6.41128	5	117.373	5.64691	9
	-0.805717	105.415	134.711	131.276	127.65	128.581	127.209	130.88	126.401		105.136	133.939	130.529	126.388	127.732	127.908	125.753	127.122		80.3731	101.66	99.6309	96.7146	108.469	88.4736	92.6914		-0.80572	96.9749	8.30128	3	122.15	6.86337	6	121.413	6.18457	5	117.212	5.47768	9
	0	100	100	100	100	100	100	100	100		100	100	100	100	100	100	100	100		100	100	100	100	100	100	100		0	100	0	3	110.745	6.80983	6	100	0	5	100	0	9
	0.0536167	101.233	96.9222	98.9474	95.383	98.8609	99.8494	100.806	99.4655		99.2098	100.216	98.5893	97.4587	98.8819	98.5714	98.7848	98.854		99.8613	98.5337	99.4383	99.5932	99.217	99.7596	100.409		0.053617	100.101	0.596342	3	98.9736	0.47347	6	98.0356	0.748082	5	99.5241	0.252469	9
	0.10755	101.148	96.2848	98.0018	96.4774	96.6517	98.2597	101.075	97.3113		99.5061	95.9511	98.6068	96.6406	97.4928	98.4014	98.818	98.389		99.0042	97.2607	96.7902	96.7459	97.651	98.6899	99.8798		0.10755	99.8862	0.647474	3	97.8571	0.579855	6	96.8017	0.178093	5	98.7195	0.381029	9
	0.16135	100.964	95.1739	98.9652	95.3488	97.3766	97.5736	99.4624	96.6796		99.7883	95.3032	96.9349	96.0313	97.0862	96.6667	96.4042	97.9738		99.4958	97.0512	96.6458	95.0407	97.635	97.4279	99.4951		0.16135	100.083	0.448667	3	97.0657	0.605002	6	96.1767	0.461738	5	97.702	0.377963	9
	0.21515	100.581	95.1011	97.1097	93.6731	97.9116	96.8876	98.0343	96.8416		99.0969	95.9151	95.8203	96.3621	96.8321	96.6327	96.7205	97.326		100.542	95.6333	95.5063	94.3992	96.069	96.3221	97.5478		0.21515	100.073	0.488351	3	95.9314	0.353507	6	95.8356	0.784851	5	96.9313	0.204485	9
	0.269017	99.9858	94.1176	96.0393	93.1601	95.2882	95.2811	97.211	95.2867		98.7018	94.6194	95.2456	93.7337	95.3583	97.0068	96.9036	96.861		98.9159	96.6806	94.8162	93.883	95.6056	95.8293	97.8603		0.269017	99.2012	0.397149	3	95.5649	0.379153	6	94.2846	0.440994	5	96.4273	0.313271	9
	0.322833	98.7525	92.3875	95.9144	91.775	94.2527	95.2811	97.2614	95.805		98.2362	92.7659	94.9843	94.1862	94.8162	95.9694	94.8726	95.4991		98.0587	93.5224	94.4953	93.0069	95.4778	96.8389	96.0692		0.322833	98.3491	0.208074	3	94.3641	0.512442	6	93.6074	0.544567	5	95.8972	0.251521	9
	0.376617	100.284	91.5134	93.8805	91.7237	95.6852	93.8588	96.3542	94.4606		99.4356	92.0281	93.295	92.5849	93.9522	95.2381	95.0225	94.8015		98.626	92.6523	93.1632	91.2078	95.6216	95.0841	96.5861		0.376617	99.4484	0.478525	3	93.1599	0.482068	6	93.0307	0.810116	5	95.2253	0.288102	9
	0.430417	99.0502	90.7303	93.4701	91.3988	93.7867	94.3106	95.6317	94.8008		98.9417	90.7504	92.8074	92.3064	93.4779	93.0442	93.5908	94.2202		98.4747	92.749	93.5002	92.6001	94.2953	94.9038	94.783		0.430417	98.8222	0.176539	3	92.6288	0.443123	6	92.714	0.426799	5	94.3978	0.25338	9
	0.484217	99.4613	88.9091	92.3818	89.6546	93.9593	92.6205	95.4301	93.4564		98.843	89.7427	92.8422	89.8172	92.6139	92.9082	93.158	92.6258		98.4747	91.057	92.0238	91.4268	94.1834	93.6659	96.0452		0.484217	98.9263	0.287833	3	91.3216	0.57853	6	91.4944	0.822537	5	93.7882	0.407525	9
	0.538083	99.1211	89.6558	91.4719	89.7743	92.5613	91.4324	94.0188	92.6142		99.3791	88.465	91.7973	90.0957	90.2422	92.1088	91.7263	92.9082		97.0377	90.4608	91.6546	90.8323	93.8479	94.5673	93.3526		0.538083	98.5126	0.741225	3	90.9713	0.507232	6	90.7012	0.495653	5	92.9529	0.360339	9
	0.591883	99.3195	88.9091	90.7047	89.0219	92.7511	91.6667	92.9099	92.355		98.3068	88.9869	91.0136	89.4691	90.869	91.1735	92.4588	92.4597		98.0335	89.2846	91.5262	90.2534	93.0649	93.8822	91.6817		0.591883	98.5533	0.391166	3	90.1145	0.578381	6	90.4729	0.652243	5	92.4058	0.275528	9
	0.645783	99.3621	88.1442	90.4014	88.3892	91.5257	91.1312	92.8763	91.9663		99.2945	87.9791	89.5158	89.2602	90.4117	91.0374	91.3601	92.1276		98.4495	89.6229	90.3065	90.8792	91.4509	94.0024	92.6794		0.645783	99.0353	0.293569	3	89.7459	0.428471	6	90.0932	0.564307	5	92.0702	0.324992	9
	0.6996	99.3904	86.1774	89.2239	87.1409	91.5257	91.7001	92.7755	90.8487		98.8147	87.0974	88.7844	88.8773	90.5472	90.7313	90.2614	92.0445		96.7099	87.3671	89.3597	88.2979	93.1128	93.4255	91.1888		0.6996	98.305	0.814672	3	88.2705	0.545539	6	89.2778	0.785859	5	91.7876	0.375902	9
	0.753433	99.1919	87.3247	87.6717	85.6703	89.7308	89.8762	94.1532	90.8811		99.0828	86.6835	88.4361	87.6762	89.9712	90.7483	89.6621	90.9816		98.21	86.7225	89.6806	88.2509	91.4989	93.8942	91.5254		0.753433	98.8283	0.310727	3	87.8802	0.460587	6	88.2599	0.77906	5	91.469	0.526989	9
	0.807167	98.4406	85.7403	87.0651	87.1238	90.5247	90.3112	92.2547	90.3628		99.0828	85.8017	88.7496	87.6762	88.7176	89.881	89.1626	90.4833		98.9411	86.3519	88.3325	88.0788	92.2819	92.6202	91.3331		0.807167	98.8215	0.194803	3	87.1016	0.442996	6	88.4242	0.585997	5	90.9656	0.403429	9
	0.861	98.228	83.5913	87.529	85.2599	90.0242	88.6212	91.8683	89.9417		97.3049	84.9379	88.5232	86.6319	89.0903	90.9014	89.2792	90.0847		95.3107	85.7396	87.5782	86.6083	91.1473	92.8486	91.8259		0.861	96.9479	0.860847	3	86.4982	0.748512	6	87.5229	0.879336	5	90.7242	0.45305	9
	0.914817	99.2345	84.9208	88.1891	86.9528	89.0059	89.1901	91.129	88.7593		98.9699	85.1899	87.7046	86.7015	88.2433	89.915	89.146	90.8819		99.3697	86.1102	88.4128	86.0763	91.1473	91.4784	89.554		0.914817	99.1914	0.117401	3	86.849	0.706167	6	87.396	0.535248	5	90.1334	0.344094	9
	0.968633	98.1996	83.5367	86.9759	84.4391	89.2302	88.7885	90.6754	88.9537		97.5166	83.5883	86.1372	85.2219	88.0908	89.6088	88.863	89.6363		98.3613	83.8543	86.4709	84.9969	91.9303	92.5721	90.2633		0.968633	98.0258	0.258862	3	85.622	0.696441	6	86.3958	0.950543	5	90.1435	0.453731	9
	1.02248	98.6107	83.646	86.6191	84.8837	88.6089	88.6379	89.7177	88.079		97.9258	82.8505	85.458	84.9782	86.2951	88.6565	87.964	89.2211		98.147	83.2581	85.524	83.6358	89.5654	90.8894	90.5517		1.02248	98.2278	0.201815	3	84.7954	0.599964	6	85.6804	0.844458	5	89.2536	0.342641	9
	1.0763	99.3621	82.2437	85.3524	84.3707	87.4698	87.6506	90.4402	88.3544		98.8712	82.2206	84.8311	84.0731	86.4984	87.585	87.681	89.2543		98.7142	82.1141	84.7537	84.684	89.9329	90.8534	90.6599		1.0763	98.9825	0.195119	3	83.7954	0.638601	6	85.4192	0.664131	5	89.1569	0.455789	9
	1.13017	98.8092	82.6443	85.3702	83.5841	87.0211	88.3869	89.2473	87.7065		97.4884	81.7168	83.7861	84.4735	86.2782	87.2789	87.165	88.3574		96.5839	82.1302	84.224	83.9956	88.1911	90.4447	88.0995		1.13017	97.6271	0.646126	3	83.5701	0.577626	6	85.0705	0.670233	5	88.3197	0.338291	9
	1.184	97.0938	82.4622	84.6387	82.9343	87.0038	86.429	89.5161	88.1924		97.0227	82.4006	83.5772	83.3768	86.1088	86.7177	87.0817	88.3242		98.7899	81.1312	83.6142	83.1977	88.1911	90.0481	89.3256		1.184	97.6355	0.57756	3	82.8915	0.548895	6	84.5243	0.844476	5	88.2029	0.42515	9
	1.23782	98.1004	80.1858	84.0856	83.8235	85.9165	87.3327	89.2809	87.415		97.9117	80.0972	83.3682	83.3072	85.5497	87.415	86.832	88.7892		96.1931	81.4373	83.1648	82.2121	86.9767	89.5312	88.364		1.23782	97.4017	0.60675	3	82.4752	0.594634	6	84.1618	0.694662	5	87.993	0.33915	9
	1.29158	98.0295	80.5682	84.4603	82.4042	86.4515	85.9772	89.2977	88.0305		97.065	79.9172	82.9328	82.7328	84.8721	87.0918	86.7155	86.9623		97.2394	80.0516	82.908	82.3217	88.0153	89.6154	88.8929		1.29158	97.4446	0.296724	3	81.9089	0.77818	6	83.7565	0.819845	5	87.8443	0.416947	9
	1.34517	97.746	79.6212	82.1231	81.6518	86.0545	85.8099	88.4073	86.9291		97.0933	78.5676	82.0794	81.3925	84.7874	85.7483	85.6667	87.8259		96.3696	78.0696	81.6883	81.1796	87.2803	89.5072	87.4384		1.34517	97.0696	0.397497	3	80.7254	0.745631	6	83.0132	1.00597	5	87.1792	0.436145	9
	1.39903	99.1919	79.7123	84.157	81.0021	84.7774	84.9063	87.0464	85.8601		97.2062	78.2437	80.7384	80.5396	83.0764	85.6122	84.2184	85.9658		96.4578	79.0203	82.1056	81.4768	87.2323	88.75	87.1379		1.39903	97.6186	0.815775	3	80.9404	0.891197	6	82.1745	0.778542	5	86.3033	0.459234	9
	1.45277	98.7667	79.8397	82.5156	80.2497	84.5702	85.2744	86.9456	85.3256		96.6417	79.0714	81.9749	81.0792	83.6185	84.6429	85.0508	86.5803		98.7142	78.0052	81.8328	81.8054	86.705	88.2332	88.7607		1.45277	98.0409	0.699732	3	80.1959	0.75481	6	82.2646	0.800784	5	86.3909	0.48139	9
	1.5066	97.8168	77.9639	82.4086	80.8311	84.8291	85.241	86.7272	84.9854		97.5589	77.9917	80.5643	80.087	84.618	84.966	84.8677	87.3443		96.7478	77.1673	81.1908	81.0701	86.4493	88.2452	86.2003		1.5066	97.3745	0.322096	3	79.9628	0.897095	6	82.2871	1.00838	5	86.114	0.398933	9
	1.5605	97.505	77.0716	82.248	80.0787	83.8454	84.9063	86.2735	84.7101		97.3896	76.5161	80.1115	79.7563	83.4152	83.4524	83.9521	86.2813		97.2268	77.6184	81.4155	80.4287	85.2669	87.8606	87.775		1.5605	97.3738	0.080695	3	79.4849	0.895626	6	81.5048	0.876843	5	85.6087	0.520017	9
	1.61432	95.4777	76.9077	81.5522	79.9761	83.224	84.2871	86.2735	84.0298		97.3896	76.5161	78.9272	79.8956	82.9409	83.8265	83.0864	85.999		96.1679	75.9104	79.4415	79.9437	85.3308	87.0312	87.8351		1.61432	96.3451	0.558968	3	78.4066	0.929588	6	81.196	0.77153	5	85.2999	0.534524	9
	1.66808	98.7525	75.8696	80.9277	80.1642	82.3093	83.7349	86.2231	83.0742		97.5307	76.0122	80.0244	79.3908	82.1108	82.6361	84.0353	85.3181		97.7562	75.8943	79.6662	79.271	85.0591	88.101	86.2483		1.66808	98.0131	0.375365	3	77.9669	0.882713	6	80.6492	0.656148	5	84.9367	0.58413	9
	1.72197	96.3	76.5434	79.9108	78.5739	81.6017	82.4967	84.8454	83.4467		97.0086	74.5546	78.1609	78.2768	82.2802	82.7721	82.6702	84.8032		97.9831	75.6365	78.7996	79.3335	84.4679	86.5264	86.6931		1.72197	97.0972	0.487897	3	77.8211	0.813544	6	80.0132	0.812752	5	84.3024	0.530116	9
	1.77578	96.8954	75.5782	79.661	77.4453	83.2068	82.5301	84.6942	82.5073		96.4724	75.4004	77.7604	78.3638	81.5348	82.6701	83.3528	84.7534		96.7099	75.7654	79.4736	78.6139	85.5864	86.6587	86.0801		1.77578	96.6926	0.122409	3	77.199	0.891358	6	79.8329	1.08684	5	84.3148	0.53549	9
	1.8296	97.0371	74.959	79.5897	78.1977	82.7235	82.162	85.5007	83.2847		96.416	75.2384	78.1087	78.4856	80.8064	82.9082	83.0032	85.0523		97.0125	73.864	78.2699	77.6439	83.6529	85.649	87.4865		1.8296	96.8219	0.203071	3	76.6406	0.907025	6	79.5714	0.955042	5	84.2999	0.572771	9
	1.88337	97.108	74.3034	78.6441	77.7702	81.1011	81.8775	84.6942	82.1672		95.9786	74.1767	77.7604	77.302	80.7386	82.602	83.1863	84.6703		97.0251	74.1218	77.7403	77.9881	83.9406	85.9976	85.467		1.88337	96.7039	0.363458	3	76.3595	0.830202	6	78.98	0.801721	5	83.8447	0.490763	9
	1.93725	96.8954	73.5021	78.3764	77.1546	80.4798	80.6727	84.9294	82.4749		96.5712	73.7808	76.1581	76.7624	79.9085	82.0748	81.5549	83.1257		98.21	73.5256	76.8255	78.2854	84.5318	86.899	85.0703		1.93725	97.2255	0.501059	3	75.6945	0.904697	6	78.5181	0.734078	5	83.4815	0.667952	9
	1.99092	96.6402	73.3382	77.3952	76.6245	81.5844	81.6265	83.8878	82.2967		97.3049	73.7088	76.6284	76.9365	79.9424	82.2109	81.2219	82.7437		97.8444	73.5256	76.4885	76.9556	82.3586	86.3582	85.6954		1.99092	97.2632	0.348263	3	75.1144	0.721968	6	78.4087	0.997491	5	83.1555	0.598092	9
	2.0449	97.5475	73.2471	77.6628	75.9405	81.2047	80.9739	83.6358	82.4911		97.0509	72.8631	76.0014	75.8573	79.4681	79.966	81.2552	83.1922		96.0166	72.9617	75.991	76.0013	82.7421	85.3606	85.0583		2.0449	96.8717	0.450915	3	75.0333	0.808538	6	77.6944	1.11324	5	82.7417	0.604722	9
	2.09857	96.1724	74.3034	76.9492	76.026	80.0656	81.4257	83.1989	81.8432		96.7687	71.4414	75.2525	75.8399	78.5194	81.0544	80.7724	82.9596		97.0377	71.5759	76.6811	76.1108	82.7581	85.0841	85.8156		2.09857	96.6596	0.255684	3	74.729	0.893751	6	77.3123	0.845697	5	82.768	0.582744	9
	2.15225	95.9881	72.0816	76.521	76.8468	79.962	80.0201	81.838	81.5679		96.2325	71.9093	75.984	75.9269	78.909	80.5102	81.3051	82.0628		97.6554	71.6887	76.0552	76.7209	83.4771	85.2043	84.8539		2.15225	96.6253	0.519827	3	73.8401	0.958527	6	77.6731	0.755164	5	82.3155	0.607113	9
	2.20607	97.987	71.9723	75.2007	75.0855	79.7031	79.9029	82.3421	80.8066		96.4442	71.0275	75.148	74.517	79.5528	79.6429	79.8402	82.0628		96.1553	71.1247	75.0762	75.5163	82.4065	85.012	83.9885		2.20607	96.8621	0.568554	3	73.5445	0.857151	6	76.8749	1.13529	5	81.7783	0.633691	9
	2.25995	97.0797	72.027	76.0393	74.9487	78.4087	79.083	81.9892	79.7862		95.0755	69.9118	75.2351	75.2654	78.8413	79.7449	79.2409	81.4981		94.8947	71.2536	74.7553	74.9844	82.1349	84.2067	84.2409		2.25995	95.6833	0.700132	3	73.3751	0.893962	6	76.4897	0.876127	5	81.325	0.66842	9
	2.31378	95.4919	71.8266	75.0758	74.0937	78.8229	79.1332	81.5524	79.8348		96.4865	68.9221	74.3992	74.6736	76.7237	78.7415	79.2575	81.4649		95.941	71.1086	75.654	75.438	81.8472	83.5938	84.3491		2.31378	95.9732	0.287566	3	73.1353	1.01209	6	75.9504	0.842298	5	81.086	0.667666	9
	2.36758	96.2291	69.8233	75.2007	74.5041	79.6859	77.7108	81.4516	80.0454		94.3559	70.2357	73.1627	74.047	77.1811	79.4388	79.5905	81.1659		96.3948	69.6423	75.5095	74.5463	80.9524	84.5553	84.4452		2.36758	95.6599	0.653783	3	72.2495	1.26114	6	75.9929	1.07577	5	81.0395	0.753543	9
	2.42135	95.7896	69.4227	75.2899	74.0766	78.6848	77.828	81.166	80.5799		96.0632	69.372	72.7099	74.1688	76.3849	79.0136	78.6249	80.9334		97.4663	69.1589	73.9849	74.3742	81.4318	83.6418	83.7721		2.42135	96.4397	0.519329	3	71.8758	1.06223	6	75.5379	0.893995	5	80.7768	0.689795	9
	2.47523	96.1866	70.9889	74.4692	73.7859	77.7701	78.5141	80.8636	79.5432		96.2325	69.102	72.4835	72.9504	76.7745	77.585	78.5251	81.2324		98.563	69.5778	74.2898	74.7028	81.7673	84.0264	83.3393		2.47523	96.994	0.784582	3	71.9013	0.92343	6	75.1967	0.905323	5	80.5996	0.744795	9
	2.52902	95.5344	70.57	74.8974	72.6915	77.4594	77.3594	80.7124	80.0777		95.3154	67.9863	72.1874	73.3681	77.5368	78.5884	77.443	79.1895		96.8234	68.8044	73.5997	73.2009	81.1122	84.2788	82.8465		2.52902	95.8911	0.470434	3	71.5762	1.01267	6	74.8514	1.08634	5	80.1787	0.782043	9
	2.58288	97.0513	70.0419	74.8974	72.4863	77.2868	77.577	79.8891	79.0735		96.1055	68.4542	73.1278	72.6719	75.8428	78.5884	78.5417	82.561		95.6007	68.1115	73.5676	73.7328	80.7766	83.4495	83.2913		2.58288	96.2525	0.425167	3	71.132	1.17518	6	74.4041	0.935659	5	80.4165	0.737804	9
	2.63657	96.6969	69.2224	72.6316	72.948	77.2178	76.9746	79.4019	79.3651		94.1442	67.4825	71.5256	72.3934	75.1821	78.0952	78.6749	80.4019		97.8318	68.3049	72.9096	73.373	80.8086	83.9784	82.1613		2.63657	96.2243	1.09044	3	70.7751	0.956343	6	74.2229	0.882734	5	79.9846	0.713074	9
	2.69027	95.2651	69.1495	73.8448	71.5116	76.9071	77.4096	79.2507	78.6038		95.7951	67.9503	71.0554	72.2193	74.7247	77.1939	78.5916	79.5383		96.1553	66.758	73.2948	73.1227	80.1534	82.6803	82.8705		2.69027	95.7385	0.258533	3	70.3425	1.22248	6	73.6971	0.965674	5	79.588	0.679171	9
	2.74403	94.8115	68.2571	74.0232	71.8536	76.8036	77.008	78.5618	78.0369		95.4988	66.8166	70.8986	71.7493	74.7755	76.7347	77.676	79.4885		97.668	67.6603	72.5084	72.888	79.7859	82.1755	82.7744		2.74403	95.9927	0.860796	3	70.2425	1.09472	6	73.614	0.965028	5	79.138	0.716728	9
	2.79787	94.939	68.2936	72.6316	71.8536	75.2503	76.2885	79.0155	78.3771		96.0773	66.4747	70.3762	71.7319	74.5214	77.432	76.8437	78.7743		95.8528	68.2082	72.027	72.3874	80.0735	83.3413	83.4836		2.79787	95.623	0.348091	3	69.8126	0.964139	6	73.1489	0.726808	5	79.2922	0.8679	9
	2.8517	95.8038	68.2754	72.3283	71.2893	74.9051	76.1714	78.8978	77.7778		95.146	66.5827	71.3166	70.705	74.5553	75.5102	77.3265	78.5916		95.8023	66.5968	72.5245	73.3886	80.0735	82.6442	82.7383		2.8517	95.5841	0.21901	3	69.4293	1.11003	6	72.9687	0.848174	5	78.859	0.857003	9
	2.90562	95.4069	68.2025	72.0071	71.5629	75.6127	76.9411	78.4274	77.1623		95.6963	65.215	70.62	70.879	74.3351	76.2075	76.5107	79.0566		98.0587	67.0158	71.048	71.6051	79.4343	81.8029	82.546		2.90562	96.3873	0.83988	3	69.3621	0.970112	6	72.799	0.919672	5	78.6765	0.76029	9
	2.95938	95.8747	66.9277	71.9001	69.5109	74.8015	75.1841	79.0995	77.7616		95.3859	65.485	69.5751	69.5039	74.5723	76.2075	76.3443	77.5453		96.6091	66.7257	70.7591	71.6364	78.3637	81.5986	82.0652		2.95938	95.9566	0.355467	3	68.6913	1.1158	6	72.005	1.16239	5	78.2411	0.785642	9
	3.01313	96.5551	67.2373	71.8466	70.1436	73.8177	76.6734	78.0074	77.4052		94.9203	66.4027	69.9408	71.6101	73.3017	75.2381	76.2111	78.193		96.2309	66.049	70.8233	71.3861	79.1147	82.5721	81.8728		3.01313	95.9021	0.499762	3	68.5027	1.07153	6	72.0519	0.669333	5	78.3653	0.824316	9
	3.06697	96.2716	66.8549	70.9723	71.238	73.6797	75.1506	77.369	77.1299		94.1724	65.521	69.279	69.1384	73.505	74.7959	74.5297	78.3425		96.1679	66.3229	70.8073	70.5413	80.1055	81.1058	81.969		3.06697	95.5373	0.683101	3	68.5501	0.919084	6	71.6205	0.873596	5	77.8331	0.922569	9
	3.1208	95.2226	66.8731	72.5245	69.8016	74.301	74.6151	78.6458	77.0813		95.3718	64.0274	68.9307	69.0339	73.0307	74.7959	74.9625	77.3127		97.5167	64.631	71.4492	70.9637	79.1787	82.3918	81.7767		3.1208	96.037	0.74109	3	68.3796	1.31536	6	71.4262	0.985261	5	77.8623	0.967908	9
	3.17467	95.3218	65.7622	70.7226	69.6135	72.9893	75.5187	77.2681	77.3729		95.1602	65.449	68.7043	69.7998	72.0989	74.7959	76.0779	78.1598		96.9999	65.0177	69.2666	70.4787	79.5781	81.9832	82.3416		3.17467	95.8273	0.588152	3	67.2878	1.10338	6	70.9961	0.663298	5	78.1218	0.898641	9
	3.22833	96.0873	65.7075	70.0803	68.6218	73.9731	75.9371	76.8481	76.3362		94.6098	64.1713	68.5301	69.3821	72.9968	74.5578	74.4132	77.5785		95.399	64.5504	70.7591	70.1815	79.1946	81.2019	80.5866		3.22833	95.3654	0.426842	3	67.5418	1.07764	6	71.031	1.0432	5	77.406	0.820202	9
	3.28225	95.095	65.0883	69.5272	69.4938	73.3	74.2805	77.4698	75.8179		94.2853	63.7034	67.6419	68.6336	72.5055	73.8946	75.3787	76.4989		96.5713	64.5665	69.2345	70.4161	78.8431	81.1418	81.1636		3.28225	95.3172	0.66919	3	66.853	1.0193	6	70.8698	0.885465	5	77.1654	0.906597	9
	3.33615	96.0731	65.0337	70.0803	69.2031	71.7121	74.2135	76.1761	75.3158		93.9326	63.8654	67.9902	68.2681	71.3366	74.6939	74.3299	77.8608		96.0545	64.0993	69.0258	69.8842	78.4756	80.2404	81.6805		3.33615	95.3534	0.710439	3	66.5974	1.09818	6	70.0808	0.645492	5	76.9985	0.905633	9
	3.38997	95.4919	65.2704	70.2944	68.3653	72.2126	73.4438	76.6129	75.5426		94.751	62.4618	68.0077	67.6588	71.3366	74.4898	73.9637	76.8145		95.4368	62.8585	69.3147	68.883	77.8364	81.3462	81.0795		3.38997	95.2266	0.238332	3	66.599	1.24091	6	69.6913	0.883371	5	76.7921	0.959722	9
	3.44375	95.3076	64.5784	69.2061	68.0062	72.2644	73.494	76.1257	75.7532		94.0454	62.9296	67.3981	67.8155	71.9634	74.0476	74.4964	76.4491		95.0208	63.2936	67.7901	68.6796	77.5168	80.5769	80.5265		3.44375	94.7913	0.382007	3	65.8896	1.14463	6	69.7458	0.97853	5	76.554	0.862867	9
	3.4976	95.3218	64.1231	68.314	68.0575	72.4715	73.6278	75.9577	75.494		93.9749	62.3718	67.4678	67.9373	70.6929	74.3027	73.7972	77.0304		96.2183	63.2775	68.1432	68.2885	76.4941	80.2043	80.7068		3.4976	95.1717	0.651964	3	65.6976	1.0282	6	69.4895	0.901191	5	76.4017	0.860411	9
	3.55143	94.4712	63.7225	68.6708	67.6642	71.2289	72.6071	76.1761	75.4616		94.4123	61.652	66.9279	66.7015	70.659	73.5374	73.997	75.6519		97.7814	62.8908	67.9345	69.2897	76.2384	79.6995	81.416		3.55143	95.555	1.11335	3	65.5097	1.149	6	69.1086	0.8606	5	76.0872	0.950427	9
	3.60527	94.3436	63.0304	67.7074	67.3393	71.5395	73.3936	76.0921	74.9919		94.5816	61.562	66.4228	67.5892	70.3541	73.4864	74.2967	76.2664		95.462	62.9069	68.8333	68.1946	77.2291	79.5192	79.7211		3.60527	94.7957	0.340131	3	65.1763	1.22507	6	69.0033	0.827031	5	76.1107	0.788291	9
	3.65902	95.5203	62.4841	68.6173	66.6382	71.1253	71.9712	75.1008	73.8581		94.2148	60.6262	66.597	66.7711	70.9639	73.6224	72.865	76.1667		96.4704	62.0206	66.9234	69.102	76.6539	79.375	79.5769		3.65902	95.4018	0.653846	3	64.6717	1.22731	6	68.9201	0.972074	5	75.4656	0.906594	9
	3.71283	95.0383	62.5569	67.8501	65.92	71.6431	72.4398	75.168	73.7123		95.1743	60.7522	65.7611	67.1715	69.9983	72.3129	72.1159	75.7017		96.899	62.3429	66.442	67.7879	76.0946	79.4952	81.1756		3.71283	95.7039	0.598875	3	64.4025	1.19401	6	68.5041	1.02598	5	75.3573	1.07151	9
	3.76668	94.9816	62.5205	68.1534	65.8687	70.107	72.0549	74.6976	74.0849		93.8197	60.1943	65.1341	65.8486	69.5409	73.1803	73.2312	75.2699		95.3359	61.1183	66.1371	68.132	76.3663	79.1226	79.6851		3.76668	94.7124	0.457934	3	64.0738	1.23731	6	67.8994	0.893085	5	75.2992	0.882878	9
	3.82053	94.9674	62.138	68.0107	66.5014	69.4857	72.1218	75.1512	74.7651		94.1442	60.7522	65.2386	65.8138	69.8289	71.5476	72.7651	75.6519		97.5923	61.6339	66.3778	67.7096	75.9827	79.1466	79.8774		3.82053	95.568	1.0397	3	63.9148	1.2454	6	67.8679	0.792928	5	75.2233	0.9661	9
	3.87428	95.0383	61.2093	67.0294	66.5527	70.4349	71.8708	74.7984	74.0201		94.1865	60.4823	63.9673	65.309	68.9141	72.1088	72.5487	74.0741		95.2099	61.4889	65.7358	67.3029	75.3915	77.7404	78.3748		3.87428	94.8116	0.316415	3	63.5757	1.11485	6	67.7027	0.898471	5	74.5475	0.774841	9
	3.92813	95.336	61.1182	66.7797	65.4583	69.3994	72.6573	73.6391	73.7771		93.4951	59.6545	64.3678	65.4656	69.4901	71.9218	72.0992	75.7848		96.4452	60.0548	66.0889	66.9274	74.8003	78.0168	79.3124		3.92813	95.0921	0.860305	3	63.0818	1.20107	6	67.3482	0.896884	5	74.6676	0.866711	9
	3.98198	94.0601	61.6281	67.2079	65.3728	70.2796	71.2182	73.9919	73.7609		92.8461	59.9064	63.6364	65.1523	68.7786	71.2925	71.4833	75.7681		96.4452	61.0216	66.6667	67.1934	75.743	77.9928	79.8654		3.98198	94.4505	1.05716	3	63.4244	1.2771	6	67.3553	0.984557	5	74.5685	1.02104	9
	4.03583	96.059	61.9559	66.405	65.4241	69.5892	70.9003	73.9247	74.0039		93.2129	60.1764	63.9324	64.9608	68.9819	71.0204	72.1159	75.5356		97.5167	60.7477	66.0729	67.3342	74.6085	78.3894	79.5889		4.03583	95.5962	1.26375	3	63.1207	1.11187	6	67.258	0.923373	5	74.4542	1.00979	9
	4.08967	95.3076	60.0255	66.0839	65.0992	69.9344	70.2142	74.2944	73.3398		93.6503	58.2868	64.333	64.456	68.0163	71.1565	72.0493	75.7848		96.3444	60.7316	66.7951	66.4737	75.7271	78.4736	79.7331		4.08967	95.1008	0.784546	3	62.9575	1.24817	6	66.7959	0.994914	5	74.5303	1.07539	9
	4.14347	95.3927	61.191	65.0847	65.5267	69.2268	71.4023	73.2191	73.599		94.2853	58.2149	64.2111	64.4038	68.5414	70.7653	70.6842	75.4028		96.1175	60.4254	64.5161	66.8961	74.7044	78.2572	79.5649		4.14347	95.2652	0.532732	3	62.3062	1.12024	6	66.919	0.900647	5	74.1777	1.05572	9
	4.1973	93.5923	61.2457	65.6021	64.381	68.5019	71.0341	73.0847	72.6757		93.8479	58.4848	64.0543	64.2472	67.8638	70.6122	71.0504	75.2035		95.6259	59.4747	65.0939	66.0513	74.209	77.6322	80.0216		4.1973	94.3554	0.639531	3	62.3071	1.26681	6	66.209	0.872097	5	73.9471	1.07034	9
	4.25113	95.2935	60.7357	65.7984	64.6717	68.9679	69.595	73.3031	72.8539		92.7473	59.3126	63.5319	64.9956	67.508	70.9354	71.8329	74.4561		95.525	59.088	65.1902	65.6758	73.6977	77.476	78.7835		4.25113	94.5219	0.889833	3	62.2252	1.30328	6	66.3638	0.815446	5	73.6593	0.982557	9
	4.30497	94.0743	60.1166	64.7814	64.5862	68.1049	70.3146	73.0511	72.1898		93.2129	58.8087	63.4796	63.9861	66.9829	70.4762	70.884	74.2402		95.3738	58.5401	64.805	64.8623	73.7456	77.7885	79.3004		4.30497	94.2203	0.628037	3	61.8479	1.16265	6	65.7045	0.784515	5	73.5545	1.05849	9
	4.35878	96.0306	59.5702	64.942	64.1416	68.5019	69.5616	72.5302	72.4328		93.6927	58.2509	63.41	63.9339	67.3895	70.9524	70.6842	74.755		96.6595	58.8785	63.9544	66.286	74.2729	77.9447	78.6032		4.35878	95.4609	0.902577	3	61.6056	1.14838	6	66.0506	0.893916	5	73.5263	1.05392	9
	4.41257	94.7973	59.0421	65.9233	64.1074	67.2247	70.1138	73.0175	72.6757		93.3822	57.0272	62.7482	63.7598	66.8812	70.1361	70.1515	74.7716		94.4914	58.7657	63.5532	65.1596	74.3049	77.8606	78.7715		4.41257	94.2236	0.42986	3	61.4908	1.31026	6	65.4265	0.704951	5	73.5337	1.0799	9
	4.46643	94.5421	59.2424	64.2462	63.4063	67.6217	70.0971	72.8327	71.5743		92.4086	56.9912	62.3476	63.3943	67.3725	70.4762	70.2181	73.8748		95.7519	58.2501	64.2273	64.6589	73.8095	77.3438	78.3147		4.46643	94.2342	0.977322	3	60.9569	1.29657	6	65.2907	0.930431	5	73.1712	1.006	9
	4.52025	94.2302	57.8947	64.3711	62.6368	67.6562	69.5114	72.9167	71.5258		93.0577	56.2894	62.069	62.9069	66.5594	69.6599	70.3513	73.5592		95.3864	58.4918	63.8581	63.908	73.6497	77.8005	78.5792		4.52025	94.2248	0.672229	3	60.6591	1.32484	6	64.7335	1.00723	5	73.0615	1.10174	9
	4.57407	94.457	59.206	64.835	62.5513	68.0532	69.7289	71.6902	72.4004		92.2675	56.3434	61.6336	61.7406	67.508	69.5408	70.7008	73.6755		95.9662	57.7022	64.3396	64.612	73.3621	77.1034	77.8219		4.57407	94.2303	1.07372	3	60.7402	1.44777	6	64.893	1.27132	5	72.8916	0.990206	9
	4.6279	93.3371	58.4593	64.4603	62.9275	66.8105	68.8922	70.8501	71.9793		94.4687	58.1249	61.1808	62.3673	67.1184	68.4864	70.035	72.9613		96.0166	58.1051	63.473	64.174	72.9466	77.1154	79.1802		4.6279	94.6075	0.776619	3	60.4124	1.3284	6	64.6795	0.978796	5	72.4941	1.20493	9
	4.68152	93.4363	57.9494	63.8894	62.1238	66.6552	68.591	72.9839	72.287		91.9571	56.1994	61.86	62.3325	65.6107	69.0476	69.0028	74.0409		96.4704	57.3961	63.4248	63.1571	73.2982	75.9615	78.0623		4.68152	93.9546	1.32841	3	60.3275	1.18475	6	63.9758	0.912488	5	72.5861	1.0902	9
	4.73523	94.5138	57.0752	63.8359	62.4829	65.9648	68.6412	72.2782	71.4448		93.1	55.4616	60.937	62.5413	65.6785	69.1497	70.1681	73.0776		94.7183	57.7989	64.4198	63.7359	73.2822	77.488	78.0983		4.73523	94.1107	0.508761	3	60.1982	1.47554	6	64.0807	0.746463	5	72.6253	1.11642	9
	4.7891	94.0601	57.7126	62.6762	62.4829	66.4135	68.2229	71.5054	70.9589		93.1283	55.8575	61.6684	61.9495	65.7801	68.6565	69.3524	73.8249		95.6133	56.3809	61.9162	63.8454	72.3554	75.0601	78.3628		4.7891	94.2672	0.724793	3	59.1807	1.24649	6	64.0943	0.879756	5	72.0332	1.09975	9
	4.84292	95.1092	57.6944	62.6405	61.816	65.4815	68.7082	71.119	71.056		93.2694	55.4076	60.5016	61.8103	65.9495	68.2823	69.9351	72.8617		95.399	57.2833	62.6224	63.2509	72.8827	76.9471	77.9541		4.84292	94.5925	0.666834	3	59.6277	1.23367	6	63.6617	0.881731	5	72.194	1.12852	9
	4.89677	94.2586	56.6746	62.2302	61.6621	66.0166	69.5448	72.0934	70.5377		92.5638	55.4076	60.2577	61.6014	65.9665	69.0476	70.3679	73.8914		97.5797	56.7999	62.3816	63.204	71.4286	75.8413	77.6656		4.89677	94.8007	1.47311	3	58.9992	1.25536	6	63.6901	0.982497	5	72.2687	0.983642	9
	4.9506	94.8256	57.2391	62.355	61.6279	66.1546	68.2062	71.5054	70.23		92.8037	55.1917	59.9094	61.7929	65.4244	68.8776	68.9862	73.9744		96.3066	56.5259	62.1088	62.4218	71.6043	77.0312	76.7881		4.9506	94.6453	1.01519	3	58.9824	1.21967	6	63.4843	0.957357	5	71.9115	1.11073	9
	5.00433	92.6708	55.8004	61.7841	61.303	66.2409	68.34	71.1862	71.2342		91.9571	54.3279	60.6061	61.4099	64.7976	67.534	68.8031	73.6755		96.4578	56.0587	61.4348	62.9224	72.3554	75.9976	78.4469		5.00433	93.6953	1.39657	3	58.3632	1.23107	6	63.3348	0.964073	5	71.9525	1.20915	9
	5.05822	93.89	56.9659	62.8903	61.5253	65.7577	68.5743	70.5309	70.1976		92.9589	54.7058	60.101	59.7041	64.2724	67.8912	68.3036	72.7786		95.399	55.6397	61.9965	62.1871	72.0997	75.9135	76.5837		5.05822	94.0826	0.710931	3	58.7377	1.45531	6	62.6893	1.05924	5	71.4303	1.06529	9
	5.11205	94.3295	56.0736	61.802	61.0123	65.4988	68.0556	71.3206	71.2828		92.9025	54.0939	59.9094	60.4178	65.4074	67.7721	68.1705	70.7524		96.6091	55.4786	62.1088	62.6408	71.4446	75.9495	77.1006		5.11205	94.6137	1.0794	3	58.3783	1.36398	6	62.9954	1.06741	5	71.3165	1.10774	9
	5.16577	93.0111	55.8732	61.7663	60.8413	65.2917	67.6539	71.0685	69.8089		93.0718	53.878	59.2128	60.7659	64.1708	67.7211	67.9541	71.4499		95.4746	55.2691	61.5632	62.5469	71.7482	75.7091	78.1705		5.16577	93.8525	0.811243	3	58.0792	1.38717	6	62.7233	0.897112	5	71.2538	1.21577	9
	5.21968	94.4287	55.7458	61.5879	60.277	64.7912	67.0348	70.1613	70.4082		92.3804	53.0862	59.0909	59.7389	64.1199	67.2789	68.7864	72.2139		94.8569	55.4947	60.8731	61.7178	70.9652	75.7933	77.0766		5.21968	93.8887	0.764199	3	57.7987	1.30005	6	62.129	1.00902	5	71.0798	1.15974	9
	5.27352	93.8191	54.9445	61.0883	60.3112	64.8775	66.3655	70.8333	69.9061		93.6362	53.4821	59.0561	59.8433	64.6282	67.415	67.9374	71.9648		94.7813	54.9146	60.9212	61.9837	70.6456	75.5529	76.5957		5.27352	94.0789	0.35515	3	57.3409	1.41016	6	62.3288	1.05238	5	70.8018	1.16476	9
	5.3273	94.4287	55.8368	61.2132	60.448	64.5668	66.8675	69.7413	70.3272		91.308	54.9397	58.8645	60.1044	63.8658	66.7687	68.1538	72.0312		96.3066	54.5118	60.2792	61.2641	71.3806	75.5409	76.6438		5.3273	94.0144	1.45774	3	57.3965	1.31287	6	62.0498	0.911062	5	70.8283	1.16985	9
	5.38115	93.3938	55.6729	60.339	60.3796	64.7912	66.4993	69.6909	69.8413		91.9148	53.3201	58.6904	60.2089	64.0861	66.8878	67.8875	72.1641		95.3359	54.7857	60.841	60.6227	70.294	75.1923	77.0886		5.38115	93.5482	0.990618	3	57.5738	1.13007	6	62.0177	0.996782	5	70.6162	1.2081	9
	5.43608	93.5639	54.5438	60.107	59.5246	65.2572	67.3025	68.9684	69.161		92.3099	53.77	58.4291	59.9826	63.3068	66.4796	67.6544	72.3468		95.525	54.4151	59.2521	61.0294	71.0291	75.1923	76.4515		5.43608	93.7996	0.935587	3	56.7214	1.20241	6	61.8201	1.07922	5	70.5095	1.17705	9
	5.50292	93.8616	54.3617	60.0357	60.4309	63.117	66.5997	70.1949	69.3554		93.2129	52.6363	58.3943	59.8433	63.3915	66.4626	68.3036	72.0644		96.0292	53.6255	59.8941	60.873	70.294	75.2644	75.9466		5.50292	94.3679	0.851499	3	56.686	1.26257	6	61.5311	0.723474	5	70.4984	1.13404	9
	5.56947	93.5781	54.5074	59.6967	60.5677	64.4978	65.8635	69.6405	70.0842		92.451	52.5463	58.1156	59.5126	63.527	66.8027	67.5545	71.8817		95.5502	53.6094	58.867	60.7791	70.3579	74.9519	77.1607		5.56947	93.8598	0.905695	3	56.2852	1.24348	6	61.7768	0.950018	5	70.4775	1.24088	9
	5.63603	94.7831	54.0703	59.4826	59.1997	63.5312	65.9304	69.4556	69.4201		92.0982	52.4744	57.7325	59.4604	63.6456	67.0068	66.7555	71.2506		95.2477	54.125	59.0595	60.6852	70.9811	73.6899	75.4538		5.63603	94.043	0.981602	3	56.2332	1.2221	6	61.3044	0.965748	5	69.9938	1.07086	9
	5.70305	93.9183	54.3617	60.0178	59.2339	63.9972	66.3153	69.3044	69.7117		92.6908	52.4384	57.628	58.5553	63.3746	65.7483	67.4713	70.0548		94.6426	53.0616	59.7978	60.7478	70.5337	74.976	76.8602		5.70305	93.7506	0.569641	3	56.241	1.37802	6	61.1818	1.08665	5	70.1084	1.23951	9
	5.76943	93.6065	54.1614	59.4112	59.3536	64.0318	66.332	69.7077	69.5335		91.9994	52.2944	57.7151	58.0679	62.951	65.8333	67.155	71.0679		94.8191	54.0606	59.3003	60.8417	69.6548	74.4111	76.8241		5.76943	93.475	0.816618	3	56.1666	1.22256	6	61.0492	1.1027	5	70.0577	1.21603	9
	5.83625	93.9609	54.0157	58.6976	58.8748	63.7211	66.1814	69.6909	68.8533		93.0154	52.6183	58.1156	58.3464	62.4428	65.8673	66.7388	70.8354		94.4031	53.2871	59.1879	59.9343	69.5749	73.7019	76.2952		5.83625	93.7931	0.409294	3	55.8663	1.22886	6	60.6639	1.03959	5	69.7488	1.1628	9
	5.90283	93.2662	53.5604	58.8046	59.2168	63.6693	65.6794	69.4556	69.8737		93.8902	51.3227	56.8269	59.1471	63.0866	66.7177	67.5379	71.0513		96.3822	53.0616	58.8349	59.7309	69.9585	73.7861	75.6822		5.90283	94.5129	0.951858	3	55.8326	1.2414	6	60.9701	0.992425	5	69.9714	1.07714	9
	5.96938	93.9042	53.1233	59.1436	59.9008	63.8592	65.5622	69.5228	69.6145		92.705	51.4486	57.0881	57.8068	62.6631	65.2721	66.6223	70.6029		95.4494	52.3203	59.2361	60.2003	70.1662	73.7861	76.752		5.96938	94.0195	0.794348	3	55.3288	1.43792	6	60.886	1.07051	5	69.7668	1.25641	9
	6.0362	92.7275	52.7044	58.1445	58.6183	63.4622	65.6292	69.0524	68.5941		92.2958	51.5206	56.8095	58.5727	63.0696	65.7483	67.388	70.8686		94.7813	51.7886	58.0806	60.6852	70.342	73.2212	74.2397		6.0362	93.2682	0.766749	3	54.8758	1.31454	6	60.8816	1.04736	5	69.4537	1.00977	9
	6.10277	93.0252	52.7773	58.7154	58.7722	63.0998	66.5328	68.6828	69.3878		92.1688	50.9268	57.2971	57.8242	61.5111	65.5442	67.5379	71.1011		94.6931	52.3203	57.7114	58.6984	68.5682	73.9303	75.7904		6.10277	93.2957	0.74114	3	54.9758	1.2735	6	59.9811	0.99564	5	69.6751	1.1263	9
	6.16958	93.6632	52.6498	58.1267	58.4473	62.5475	65.5455	69.0524	69.1934		92.2252	50.9448	57.1055	57.7198	61.7483	65.102	66.5723	70.2873		94.4031	52.1431	58.1287	58.9643	68.6641	72.4159	75.8024		6.16958	93.4305	0.639387	3	54.8787	1.35438	6	59.8854	0.952975	5	69.1817	1.1333	9
	6.23617	93.5072	52.7408	57.8947	57.7291	62.651	65.1606	68.162	68.7399		92.4933	50.5309	56.0954	57.2324	61.7991	66.0034	66.8054	70.2209		95.0208	51.9336	58.7065	59.3242	69.7667	72.3317	76.3914		6.23617	93.6738	0.734363	3	54.8877	1.38355	6	59.7472	1.07746	5	69.2869	1.15697	9
	6.30303	93.2662	51.8121	57.0027	57.8317	63.2724	64.9264	68.498	68.4321		91.8724	50.171	55.1028	56.9539	62.3751	65.2041	66.1728	69.5067		95.4368	52.3364	58.4336	59.3398	68.7919	72.8846	76.6799		6.30303	93.5251	1.03705	3	54.3685	1.31452	6	59.9546	1.24006	5	69.0107	1.25798	9
	6.36973	93.0536	52.0124	57.9126	57.7462	61.2185	64.9766	68.5484	68.5779		92.1405	50.9088	55.0331	57.0757	61.7483	65.034	65.407	69.0251		96.4957	51.3696	58.4978	59.0269	69.2554	73.149	74.985		6.36973	93.8966	1.32599	3	54.1777	1.43871	6	59.3631	0.924415	5	68.7732	1.16575	9
	6.43617	94.1452	51.2475	57.2168	57.6607	62.1505	64.3574	68.33	67.5899		91.6608	50.171	55.6252	57.0931	61.4433	65.5612	66.1229	69.3739		97.189	51.8692	57.7114	59.4337	68.8559	73.5577	75.8745		6.43617	94.3316	1.59857	3	53.9978	1.24983	6	59.5563	0.999155	5	68.847	1.24764	9
	6.50298	93.8333	51.5389	57.6093	57.028	62.5647	64.9766	68.6324	68.4807		92.1123	49.5951	55.4162	57.2846	61.3756	65.6803	65.3904	69.5233		94.2014	51.4985	57.4065	58.8861	68.5682	72.9688	75.4418		6.50298	93.3824	0.643847	3	53.9749	1.34468	6	59.4278	1.10181	5	68.8514	1.16757	9
	6.56955	93.4647	51.1564	57.3952	57.0964	62.2195	64.4411	67.9435	68.092		91.9289	50.2429	55.2769	55.8921	61.1892	64.0986	65.8898	69.9219		95.9032	51.9497	56.9571	58.5732	69.0476	73.4255	75.4778		6.56955	93.7656	1.15711	3	53.745	1.33641	6	58.9941	1.1963	5	68.7042	1.28037	9
	6.63632	93.3088	51.12	57.9126	57.9343	61.9434	64.4244	67.8427	67.3955		92.3945	48.9293	54.7196	56.6928	61.3925	64.7789	66.539	69.6562		95.0208	50.6445	57.1337	59.0582	68.776	73.4495	74.5883		6.63632	93.5747	0.769711	3	53.7218	1.41378	6	59.4042	1.00082	5	68.6056	1.17161	9
	7.46628	104.905	10.9816	10.8653	11.1149	11.4429	11.6968	12.8024	13.1519		104.868	12.0569	14.0369	11.3838	11.113	12.1769	12.5187	13.702		89.5374	9.28134	9.17991	8.72966	9.73154	8.78606	9.62856		7.46628	99.7702	5.1164	3	23.9928	8.83824	6	10.7568	0.511284	5	11.5772	0.586306	9
	7.52002	104.948	10.3806	10.9188	11.2175	11.3393	11.7303	12.3488	13.0709		105.235	11.3011	13.2881	11.2794	10.5709	11.8707	12.0693	13.2536		90.9366	8.78182	9.16386	8.58886	9.57175	8.90625	9.54442		7.52002	100.373	4.71893	3	10.8898	0.794753	6	10.5992	0.521295	5	11.374	0.53884	9
	7.57372	105.855	10.417	10.6869	10.7045	11.4601	11.2617	12.3488	12.8928		105.559	11.0671	12.783	10.8268	10.8589	11.4626	12.1358	13.4197		88.7558	8.58846	8.57005	8.36984	9.65165	8.65385	9.48431		7.57372	100.057	5.65108	3	10.4753	0.726446	6	10.444	0.534846	5	11.2568	0.550955	9
	7.62755	105.826	10.672	10.7583	10.79	11.0804	11.2115	12.3656	12.9414		106.336	10.6892	12.2083	10.6179	10.6556	11.8537	11.9527	13.0875		89.5878	8.57235	8.47376	8.33855	9.57175	8.65385	9.64058		7.62755	100.583	5.4997	3	10.3877	0.667729	6	10.2965	0.496183	5	11.2532	0.533441	9
	7.6813	106.252	10.0164	10.5798	10.8242	11.184	11.2952	12.164	12.6984		104.205	10.5633	11.9122	10.7398	10.6048	11.5476	11.9361	13.2702		89.3483	8.31453	8.36142	8.4637	9.53979	8.65385	9.66462		7.6813	99.935	5.32623	3	10.0283	0.611255	6	10.3633	0.484482	5	11.1966	0.523456	9
	7.7352	104.409	10.3624	10.8475	10.5677	11.184	11.1613	12.1472	12.7956		104.431	11.1571	11.7032	10.6353	10.537	11.3265	11.753	13.2038		90.2559	8.16951	8.57005	8.1821	9.71556	8.60577	9.25592		7.7352	99.6984	4.72127	3	10.0708	0.582773	6	10.2212	0.523268	5	11.1072	0.532512	9
	7.78897	106.762	10.1074	10.6155	10.5164	11.1667	11.1278	12.3152	12.8928		104.191	10.3113	11.5465	10.5309	10.2151	11.1905	12.0027	13.2204		90.6088	8.25008	8.52191	8.33855	9.66763	8.60577	9.6526		7.78897	100.521	5.01115	3	10.0592	0.573186	6	10.1535	0.479511	5	11.1861	0.531137	9
	7.84278	105.444	10.2349	10.6512	10.6703	10.8733	11.3956	12.248	12.7632		103.584	10.3653	11.4768	10.6005	10.6725	11.5306	11.753	12.8716		89.4996	8.16951	8.42561	8.35419	9.41195	8.4976	9.74877		7.84278	99.5091	5.03347	3	9.88985	0.539271	6	10.2342	0.472198	5	11.1356	0.518522	9
	7.8966	105.061	10.1257	10.5263	10.4822	10.8043	11.6466	12.1136	12.666		103.358	10.2573	11.024	10.4787	10.6556	11.4796	11.703	13.1872		89.9912	8.13729	8.47376	8.30726	9.23618	8.76202	9.58048		7.8966	99.4702	4.76491	3	9.85086	0.525134	6	10.1456	0.463558	5	11.1527	0.525284	9
	7.95042	105.77	10.326	10.6512	10.5164	10.787	11.6131	12.1136	12.7794		104.981	10.1674	11.0589	10.8616	10.4184	11.3776	11.703	13.2204		89.7391	8.05672	8.34537	8.26033	9.34803	8.48558	9.31602		7.95042	100.163	5.21708	3	9.77677	0.511871	6	10.1688	0.484129	5	11.1063	0.554459	9
	8.0043	105.614	10.1439	10.3836	10.3625	10.7007	11.2784	11.828	13.0709		104.713	10.1134	10.9718	10.7224	10.5031	11.2755	11.8861	13.0211		88.3903	8.04061	8.21698	8.36984	9.37999	8.42548	9.46027		8.0043	99.5723	5.59707	3	9.66854	0.505841	6	10.1317	0.445425	5	11.0695	0.547438	9
																																10.5426	0.42921	2
RAW DATA
	Time (min)	0/0	50/0	50/0	50/500	50/500	50/2000	50/2000	50/2000		0/0	50/0	50/0	50/500	50/500	50/2000	50/2000	50/2000		0/0	50/0	50/0	50/500	50/500	50/2000	50/2000
	-6.56465	9703	9497	9556	9538	9599	10173	10945	11394		9127	8889	8943	9140	9227	9290	9440	9552		8811	8969	9159	9207	9452	9459	10010
	-6.49792	9389	9138	9357	9310	9530	9954	10873	11370		8935	8771	8749	9031	9172	9207	9226	9318		8668	8889	8889	9096	9224	9380	9822
	-6.4311	9165	9068	9245	9292	9322	9698	10555	10901		8752	8682	8558	8795	8965	9074	9258	9150		8470	8795	8891	9010	9050	9126	9675
	-6.36453	9119	8917	9085	9129	9180	9624	10506	10708		8679	8539	8536	8706	8926	8905	9114	9083		8512	8701	8791	8929	9013	9170	9624
	-6.29753	9040	8847	9008	8992	9084	9520	10377	10675		8641	8378	8504	8680	8914	9004	9040	8950		8481	8780	8756	8844	9012	9076	9409
	-6.23097	8870	8732	8864	9012	9094	9543	10356	10745		8535	8341	8360	8485	8803	8876	8989	8904		8430	8584	8728	8665	8894	8992	9357
	-6.16427	8894	8686	8758	8983	8897	9508	10207	10513		8477	8137	8248	8385	8651	8763	9027	8796		8312	8580	8741	8720	8803	8938	9417
	-6.09775	8870	8616	8619	8778	8709	9191	10198	10358		8404	8139	8231	8342	8477	8713	8927	8645		8246	8605	8519	8600	8787	9011	9314
	-6.03102	8590	8398	8499	8750	8772	9263	9980	10439		8235	8096	8079	8226	8394	8659	8661	8527		8136	8429	8428	8474	8741	8774	9159
	-5.96447	8643	8429	8455	8599	8656	9001	9858	10197		8154	8037	7963	8098	8323	8542	8705	8480		8154	8469	8453	8424	8707	8668	9258
	-5.89783	8583	8299	8380	8563	8605	8975	9704	10065		8119	7900	7870	8024	8277	8567	8617	8377		8004	8236	8184	8384	8563	8750	9073
	-5.8308	8392	8312	8349	8446	8500	8926	9668	10233		7994	7790	7997	8062	8116	8313	8492	8355		7935	8159	8131	8334	8462	8697	8902
	-5.76443	8362	8291	8378	8369	8443	8804	9643	10047		8093	7768	7823	7965	8070	8265	8359	8269		7890	8135	8102	8176	8398	8542	8882
	-5.69785	8498	8203	8260	8301	8449	8642	9577	9627		8013	7746	7823	7847	7966	8231	8237	8259		7837	8083	8009	8168	8354	8467	8791
	-5.63103	8270	8117	8211	8226	8292	8632	9498	9796		7935	7704	7730	7862	7987	8100	8161	8093		7720	8044	8024	8069	8290	8313	8709
	-5.56442	8366	8062	8182	8329	8377	8605	9416	9815		8042	7665	7712	7713	7870	8018	8199	8010		7809	7901	8002	8010	8249	8250	8633
	-5.4976	8251	8106	8113	8118	8306	8661	9336	9554		8012	7780	7683	7753	7849	7999	8082	7995		7658	7932	7872	7996	8173	8182	8543
	-5.43103	8076	8012	8116	8137	8198	8553	9316	9722		7837	7623	7588	7719	7859	7918	7998	8081		7625	7816	7735	7907	8198	8105	8438
	-5.36448	7994	8068	8018	8192	8222	8531	9306	9598		7824	7629	7555	7564	7780	7906	8035	7904		7634	7807	7845	7807	8042	8105	8291
	-5.2977	8162	7921	8021	8164	8235	8494	9477	9598		7805	7525	7580	7642	7717	7797	7940	7891		7489	7805	7767	7729	7960	8033	8393
	-5.23113	8172	8081	8049	8133	8217	8491	9362	9551		7700	7448	7556	7625	7693	7928	7977	7911		7500	7797	7752	7723	8015	8073	8321
	-5.16432	8140	8128	7973	8068	8197	8437	9339	9454		7786	7497	7567	7572	7696	7807	7926	7886		7467	7687	7812	7679	7799	7952	8292
	-5.09775	7877	8000	8003	7997	8094	8427	9256	9534		7603	7417	7562	7545	7669	7806	7957	7844		7483	7593	7643	7675	7806	7927	8227
	-5.03118	8012	7869	8085	8016	8220	8400	9328	9530		7661	7409	7469	7566	7662	7994	7891	7818		7372	7599	7730	7637	7797	7934	8171
	-4.96435	7998	7980	8096	8092	8129	8407	9273	9457		7597	7459	7564	7498	7647	7761	7802	7856		7383	7551	7678	7578	7850	7837	8102
	-4.8976	7935	7938	7963	8044	8157	8340	9165	9454		7587	7342	7459	7514	7549	7719	7844	7733		7453	7404	7627	7571	7805	7881	8058
	-4.83092	8052	7900	7982	8029	8152	8303	9084	9229		7583	7315	7486	7507	7551	7761	7781	7802		7440	7466	7616	7573	7698	7759	8005
	-4.76437	8056	7876	7947	7983	8096	8326	9212	9142		7491	7340	7383	7435	7484	7663	7725	7829		7380	7488	7549	7487	7779	7827	7921
	-4.69753	8078	7870	7863	7948	8050	8355	9165	9306		7447	7336	7407	7440	7548	7695	7780	7738		7319	7479	7540	7501	7638	7670	8008
	-4.63102	8059	7868	7868	7987	7927	8188	9089	9103		7430	7382	7419	7466	7575	7687	7765	7757		7297	7370	7561	7501	7707	7715	7965
	-4.56445	8040	7821	7811	7926	7975	8279	9003	9007		7372	7295	7357	7417	7503	7660	7657	7747		7298	7435	7539	7453	7665	7669	7901
	-4.49763	8011	7867	7882	7904	7970	8226	9001	9133		7444	7195	7343	7415	7550	7644	7675	7697		7284	7398	7555	7483	7540	7546	7975
	-4.43107	7808	7876	7714	7971	7916	8210	8943	9238		7382	7362	7416	7397	7539	7584	7662	7683		7261	7398	7498	7430	7551	7642	7941
	-4.36407	7827	7869	7782	7910	7902	8170	8872	9229		7324	7219	7331	7378	7504	7574	7710	7730		7281	7315	7472	7324	7549	7612	7693
	-4.29768	7993	7745	7950	7907	7937	8135	9026	9252		7387	7260	7332	7346	7427	7689	7649	7634		7252	7355	7371	7463	7555	7647	7775
	-4.23112	7869	7688	7756	7851	7902	8064	9064	8953		7371	7230	7268	7393	7440	7504	7621	7632		7298	7379	7406	7335	7541	7563	7700
	-4.1643	7879	7794	7774	7838	7936	8130	9007	8867		7300	7231	7214	7369	7428	7602	7612	7618		7204	7380	7344	7356	7519	7483	7837
	-4.09768	7951	7767	7709	7837	7842	8010	8955	9054		7222	7234	7220	7316	7502	7510	7584	7732		7186	7281	7334	7338	7425	7616	7576
	-4.03085	7834	7698	7692	7776	7906	8101	8913	8824		7247	7224	7176	7330	7428	7486	7589	7584		7237	7381	7360	7327	7486	7558	7705
	-3.9643	7937	7693	7700	7796	7836	8037	8858	9041		7288	7182	7188	7254	7300	7521	7643	7525		7262	7223	7326	7368	7549	7577	7667
	-3.89778	7940	7676	7699	7749	7805	7977	8899	8803		7265	7160	7211	7214	7385	7390	7584	7633		7161	7308	7370	7367	7420	7569	7670
	-3.83095	7809	7695	7648	7749	7748	7934	8843	8897		7314	7253	7117	7092	7380	7485	7571	7620		7206	7214	7277	7378	7546	7444	7725
	-3.7644	7847	7730	7692	7746	7747	7905	8913	8859		7224	7203	7188	7205	7284	7450	7492	7508		7219	7259	7370	7192	7440	7476	7599
	-3.69737	7811	7604	7725	7746	7873	8025	8753	8967		7202	7259	7140	7203	7370	7428	7521	7452		7212	7114	7318	7293	7480	7474	7528
	-3.631	7852	7664	7595	7663	7794	7919	8808	8768		7194	7247	7139	7105	7300	7348	7546	7541		7294	7180	7249	7291	7296	7514	7560
	-3.56425	7802	7668	7625	7725	7760	7967	8702	8815		7193	7190	7117	7118	7273	7411	7507	7558		7317	7201	7350	7220	7509	7403	7376
	-3.49762	7700	7657	7604	7657	7756	7896	8619	8694		7251	7244	7127	6990	7224	7336	7414	7509		7154	7216	7302	7328	7360	7369	7579
	-3.431	7697	7641	7678	7636	7717	7817	8737	8884		7223	7130	7155	7098	7240	7354	7412	7572		7105	7144	7299	7279	7439	7385	7444
	-3.36418	7675	7590	7524	7621	7634	7947	8737	8704		7125	7153	7105	7113	7255	7472	7417	7443		7181	7180	7241	7223	7296	7454	7455
	-3.29762	7760	7629	7609	7621	7654	7916	8671	8701		7160	7141	7047	7057	7344	7494	7444	7447		7128	7182	7160	7146	7365	7366	7357
	-3.2308	7719	7517	7513	7634	7746	7899	8685	8725		7237	7131	7065	7063	7215	7227	7518	7465		7198	7184	7248	7150	7462	7393	7364
	-3.16428	7742	7667	7505	7572	7592	7854	8719	8744		7143	7082	7041	7088	7181	7314	7512	7368		7083	7278	7272	7075	7306	7352	7453
	-3.09772	7769	7538	7573	7529	7565	7828	8664	8667		7136	7102	7079	7107	7198	7366	7420	7477		7110	7115	7178	7174	7345	7336	7459
	-3.03088	7902	7558	7581	7609	7679	7794	8555	8704		7143	7083	7076	7098	7189	7352	7445	7444		7154	7102	7233	7204	7351	7386	7441
	-2.96433	7690	7534	7562	7470	7591	7819	8691	8769		7175	7033	6985	7103	7198	7323	7440	7403		7107	7143	7140	7168	7347	7330	7435
	-2.8975	7659	7600	7488	7491	7604	7774	8559	8696		7171	7007	7047	7002	7237	7301	7329	7461		7138	7088	7041	7138	7337	7352	7421
	-2.83093	7777	7602	7530	7572	7673	7746	8617	8679		7109	7091	7043	7041	7222	7223	7462	7333		7112	6989	7201	7128	7264	7353	7406
	-2.76418	7708	7549	7463	7608	7637	7804	8586	8576		7142	7013	6957	6944	7205	7248	7368	7467		7097	7037	7169	7276	7196	7262	7310
	-2.69755	7425	7525	7508	7580	7518	7703	8513	8855		7126	6987	7079	7064	7096	7253	7358	7438		7102	7180	7055	7091	7170	7300	7519
	-1.828	6514	6411	6448	6171	7102	6884	7441	8127		7535	7570	7583	7649	7831	8047	8141	8163		7548	7732	7718	7656	7865	7918	7786
	-1.77437	6574	6384	6266	6134	7084	6865	7453	7970		7539	7466	7607	7643	7878	7968	8087	8179		7507	7700	7743	7682	7808	7802	7863
	-1.72065	6440	6391	6364	6185	7000	6816	7473	8016		7496	7460	7649	7554	7848	7910	7995	8037		7602	7574	7553	7575	7732	7816	7878
	-1.66682	6599	6385	6298	6131	6998	6708	7516	8065		7574	7537	7682	7619	7727	7939	8109	8000		7426	7558	7633	7535	7786	7706	7869
	-1.61303	6498	6320	6337	6160	6961	6698	7385	8077		7452	7485	7582	7596	7722	7900	8042	7989		7405	7582	7529	7576	7709	7691	7888
	-1.55923	6300	6337	6286	6143	6982	6706	7379	7846		7465	7414	7487	7557	7698	7910	7903	8000		7540	7454	7621	7536	7647	7628	7774
	-1.5054	6302	6394	6322	6136	6991	6813	7452	7712		7459	7543	7597	7464	7714	7862	7992	8006		7487	7492	7504	7494	7626	7710	7815
	-1.45162	6317	6336	6333	6148	7034	6708	7487	7791		7420	7559	7528	7473	7635	7867	7931	7938		7473	7501	7603	7429	7606	7676	7763
	-1.39778	6399	6370	6289	6123	7029	6699	7510	7961		7485	7501	7452	7432	7626	7822	7915	7916		7481	7512	7583	7444	7631	7576	7868
	-1.34395	6399	6356	6371	6133	6872	6717	7344	7805		7467	7462	7508	7419	7715	7714	7839	7876		7389	7479	7477	7430	7627	7561	7736
	-1.29012	6376	6330	6328	6234	6897	6635	7409	7846		7358	7456	7442	7416	7542	7803	7847	7854		7367	7437	7608	7328	7603	7603	7852
	-1.23627	6397	6315	6300	6157	6964	6632	7463	7806		7435	7486	7435	7372	7517	7810	7827	7900		7431	7436	7390	7400	7607	7643	7713
	-1.1824	6443	6342	6317	6172	6918	6640	7409	7843		7459	7531	7376	7369	7522	7748	7758	7906		7434	7517	7506	7403	7608	7514	7749
	-1.12865	6448	6391	6238	6191	6904	6592	7435	7722		7423	7457	7405	7405	7518	7655	7820	7849		7374	7459	7544	7371	7544	7648	7728
	-1.07485	6362	6302	6269	6172	6797	6584	7418	7686		7424	7370	7385	7413	7577	7675	7787	7875		7410	7427	7560	7432	7551	7594	7721
	-1.02095	6435	6323	6292	6233	6822	6558	7385	7824		7467	7302	7480	7389	7644	7688	7804	7826		7438	7402	7496	7467	7534	7578	7664
	-0.967233	6401	6306	6233	6078	6907	6546	7307	7812		7404	7413	7328	7383	7497	7689	7833	7826		7455	7466	7473	7357	7607	7588	7587
	-0.913367	6405	6320	6285	6144	6781	6597	7371	7611		7417	7369	7447	7347	7525	7748	7735	7765		7354	7469	7433	7394	7554	7653	7639
	-0.859533	6371	6318	6259	6135	6774	6538	7359	7597		7408	7320	7414	7423	7469	7668	7755	7841		7405	7546	7455	7347	7571	7613	7647
	-0.805717	6376	6309	6208	6182	6788	6528	7361	7711		7436	7397	7358	7465	7450	7602	7790	7804		7451	7443	7495	7261	7540	7521	7654
	0	7933	6206	6231	6392	6258	6628	8320	8319		7054	5491	5605	5848	5794	5976	5952	6174		7087	5557	5742	5745	5903	5880	6021
	0.0536167	7922	6115	6196	6366	6209	6408	8300	8353		7141	5322	5546	5578	5728	5967	6000	6141		7031	5569	5661	5599	5837	5796	5952
	0.10755	7854	6036	6031	6184	6111	6479	8211	8309		7135	5287	5493	5642	5600	5872	6016	6008		7052	5332	5662	5552	5755	5786	5924
	0.16135	7893	6023	6022	6075	6110	6333	8106	8277		7122	5226	5547	5576	5642	5831	5920	5969		7072	5296	5566	5517	5731	5684	5899
	0.21515	7976	5935	5951	6034	6012	6313	8014	8115		7095	5222	5443	5478	5673	5790	5835	5979		7023	5330	5502	5536	5716	5682	5860
	0.269017	7847	6000	5908	6001	5983	6334	7973	8141		7053	5168	5383	5448	5521	5694	5786	5883		6995	5258	5469	5385	5629	5704	5832
	0.322833	7779	5804	5888	5945	5975	6336	8057	7992		6966	5073	5376	5367	5461	5694	5789	5915		6962	5155	5454	5411	5597	5643	5750
	0.376617	7824	5750	5805	5830	5984	6237	7911	8035		7074	5025	5262	5364	5544	5609	5735	5832		7047	5114	5357	5319	5546	5600	5708
	0.430417	7812	5756	5826	5919	5901	6146	7896	7885		6987	4982	5239	5345	5434	5636	5692	5853		7012	5043	5329	5303	5518	5471	5673
	0.484217	7812	5651	5734	5844	5894	6126	7793	7990		7016	4882	5178	5243	5444	5535	5680	5770		7005	4987	5331	5160	5467	5463	5577
	0.538083	7698	5614	5711	5806	5873	6097	7868	7766		6992	4923	5127	5250	5363	5464	5596	5718		7043	4916	5271	5176	5327	5416	5594
	0.591883	7777	5541	5703	5769	5824	6104	7811	7627		7006	4882	5084	5206	5374	5478	5530	5702		6967	4945	5226	5140	5364	5361	5567
	0.645783	7810	5562	5627	5809	5723	6061	7821	7710		7009	4840	5067	5169	5303	5446	5528	5678		7037	4889	5140	5128	5337	5353	5547
	0.6996	7672	5422	5568	5644	5827	6097	7773	7586		7011	4732	5001	5096	5303	5480	5522	5609		7003	4840	5098	5106	5345	5335	5542
	0.753433	7791	5382	5588	5641	5726	6024	7812	7614		6997	4795	4914	5010	5199	5371	5604	5611		7022	4817	5078	5037	5311	5336	5478
	0.807167	7849	5359	5504	5630	5775	5951	7706	7598		6944	4708	4880	5095	5245	5397	5491	5579		7022	4768	5096	5037	5237	5285	5448
	0.861	7561	5321	5457	5536	5704	5993	7725	7639		6929	4590	4906	4986	5216	5296	5468	5553		6896	4720	5083	4977	5259	5345	5424
	0.914817	7883	5344	5509	5502	5704	5862	7611	7450		7000	4663	4943	5085	5157	5330	5424	5480		7014	4734	5036	4981	5209	5287	5472
	0.968633	7803	5204	5388	5433	5753	5905	7702	7509		6927	4587	4875	4938	5170	5306	5397	5492		6911	4645	4946	4896	5200	5269	5397
	1.02248	7786	5167	5329	5346	5605	5798	7562	7533		6956	4593	4855	4964	5134	5297	5340	5438		6940	4604	4907	4882	5094	5213	5372
	1.0763	7831	5096	5281	5413	5628	5832	7559	7542		7009	4516	4784	4934	5068	5238	5383	5455		7007	4569	4871	4830	5106	5150	5374
	1.13017	7662	5097	5248	5369	5519	5806	7525	7329		6970	4538	4785	4888	5042	5282	5312	5415		6909	4541	4811	4853	5093	5132	5320
	1.184	7837	5035	5210	5318	5519	5748	7492	7431		6849	4528	4744	4850	5041	5165	5328	5445		6876	4579	4799	4790	5083	5099	5318
	1.23782	7631	5054	5182	5255	5443	5785	7449	7351		6920	4403	4713	4902	4978	5219	5314	5397		6939	4451	4787	4786	5050	5140	5346
	1.29158	7714	4968	5166	5262	5508	5684	7456	7395		6915	4424	4734	4819	5009	5138	5315	5435		6879	4441	4762	4753	5010	5121	5236
	1.34517	7645	4845	5090	5189	5462	5716	7447	7274		6895	4372	4603	4775	4986	5128	5262	5367		6881	4366	4713	4676	5005	5042	5288
	1.39903	7652	4904	5116	5208	5459	5559	7384	7249		6997	4377	4717	4737	4912	5074	5181	5301		6889	4348	4636	4627	4904	5034	5176
	1.45277	7831	4841	5099	5229	5426	5583	7341	7384		6967	4384	4625	4693	4900	5096	5175	5268		6849	4394	4707	4658	4936	4977	5213
	1.5066	7675	4789	5059	5182	5410	5602	7342	7171		6900	4281	4619	4727	4915	5094	5162	5247		6914	4334	4626	4601	4995	4996	5259
	1.5605	7713	4817	5073	5141	5336	5632	7310	7302		6878	4232	4610	4683	4858	5074	5135	5230		6902	4252	4600	4582	4924	4907	5195
	1.61432	7629	4711	4950	5110	5340	5593	7241	7307		6735	4223	4571	4677	4822	5037	5135	5188		6902	4252	4532	4590	4896	4929	5178
	1.66808	7755	4710	4964	5067	5323	5579	7330	7175		6966	4166	4536	4688	4769	5004	5132	5129		6912	4224	4595	4561	4847	4859	5137
	1.72197	7773	4694	4910	5071	5286	5474	7199	7212		6793	4203	4479	4595	4728	4930	5050	5152		6875	4143	4488	4497	4857	4867	5106
	1.77578	7672	4702	4952	5025	5356	5455	7210	7161		6835	4150	4465	4529	4821	4932	5041	5094		6837	4190	4465	4502	4813	4861	5103
	1.8296	7696	4584	4877	4963	5235	5439	7126	7278		6845	4116	4461	4573	4793	4910	5089	5142		6833	4181	4485	4509	4770	4875	5121
	1.88337	7697	4600	4844	4985	5253	5514	7155	7110		6850	4080	4408	4548	4699	4893	5041	5073		6802	4122	4465	4441	4766	4857	5098
	1.93725	7791	4563	4787	5004	5290	5401	7230	7077		6835	4036	4393	4512	4663	4821	5055	5092		6844	4100	4373	4410	4717	4826	5005
	1.99092	7762	4563	4766	4919	5154	5448	7185	7129		6817	4027	4338	4481	4727	4878	4993	5081		6896	4096	4400	4420	4719	4834	4982
	2.0449	7617	4528	4735	4858	5178	5389	7102	7076		6881	4022	4353	4441	4705	4839	4978	5093		6878	4049	4364	4358	4691	4702	5009
	2.09857	7698	4442	4778	4865	5179	5349	7079	7139		6784	4080	4313	4446	4639	4866	4952	5053		6858	3970	4321	4357	4635	4766	4995
	2.15225	7747	4449	4739	4904	5224	5372	7089	7059		6771	3958	4289	4494	4633	4782	4871	5036		6820	3996	4363	4362	4658	4734	4941
	2.20607	7628	4414	4678	4827	5157	5368	7073	6987		6912	3952	4215	4391	4618	4775	4901	4989		6835	3947	4315	4281	4696	4683	4941
	2.25995	7528	4422	4658	4793	5140	5306	7006	7008		6848	3955	4262	4383	4543	4726	4880	4926		6738	3885	4320	4324	4654	4689	4907
	2.31378	7611	4413	4714	4822	5122	5359	6955	7017		6736	3944	4208	4333	4567	4729	4854	4929		6838	3830	4272	4290	4529	4630	4905
	2.36758	7647	4322	4705	4765	5066	5304	7035	7025		6788	3834	4215	4357	4617	4644	4848	4942		6687	3903	4201	4254	4556	4671	4887
	2.42135	7732	4292	4610	4754	5096	5255	6959	6969		6757	3812	4220	4332	4559	4651	4831	4975		6808	3855	4175	4261	4509	4646	4873
	2.47523	7819	4318	4629	4775	5117	5276	6991	6933		6785	3898	4174	4315	4506	4692	4813	4911		6820	3840	4162	4191	4532	4562	4891
	2.52902	7681	4270	4586	4679	5076	5262	7012	6892		6739	3875	4198	4251	4488	4623	4804	4944		6755	3778	4145	4215	4577	4621	4768
	2.58288	7584	4227	4584	4713	5055	5227	6943	6929		6846	3846	4198	4239	4478	4636	4755	4882		6811	3804	4199	4175	4477	4621	4971
	2.63657	7761	4239	4543	4690	5057	5232	6987	6835		6821	3801	4071	4266	4474	4600	4726	4900		6672	3750	4107	4159	4438	4592	4841
	2.69027	7628	4143	4567	4674	5016	5239	6879	6894		6720	3797	4139	4182	4456	4626	4717	4853		6789	3776	4080	4149	4411	4539	4789
	2.74403	7748	4199	4518	4659	4993	5248	6837	6886		6688	3748	4149	4202	4450	4602	4676	4818		6768	3713	4071	4122	4414	4512	4786
	2.79787	7604	4233	4488	4627	5011	5183	6934	6945		6697	3750	4071	4202	4360	4559	4703	4839		6809	3694	4041	4121	4399	4553	4743
	2.8517	7600	4133	4519	4691	5011	5190	6876	6883		6758	3749	4054	4169	4340	4552	4696	4802		6743	3700	4095	4062	4401	4440	4732
	2.90562	7779	4159	4427	4577	4971	5161	6806	6867		6730	3745	4036	4185	4381	4598	4668	4764		6782	3624	4055	4072	4388	4481	4760
	2.95938	7664	4141	4409	4579	4904	5165	6789	6827		6763	3675	4030	4065	4334	4493	4708	4801		6760	3639	3995	3993	4402	4481	4669
	3.01313	7634	4099	4413	4563	4951	5071	6870	6811		6811	3692	4027	4102	4277	4582	4643	4779		6727	3690	4016	4114	4327	4424	4708
	3.06697	7629	4116	4412	4509	5013	5186	6748	6819		6791	3671	3978	4166	4269	4491	4605	4762		6674	3641	3978	3972	4339	4398	4717
	3.1208	7736	4011	4452	4536	4955	5167	6855	6803		6717	3672	4065	4082	4305	4459	4681	4759		6759	3558	3958	3966	4311	4398	4655
	3.17467	7695	4035	4316	4505	4980	5079	6821	6850		6724	3611	3964	4071	4229	4513	4599	4777		6744	3637	3945	4010	4256	4398	4706
	3.22833	7568	4006	4409	4486	4956	5106	6756	6704		6778	3608	3928	4013	4286	4538	4574	4713		6705	3566	3935	3986	4309	4384	4671
	3.28225	7661	4007	4314	4501	4934	5066	6751	6752		6708	3574	3897	4064	4247	4439	4611	4681		6682	3540	3884	3943	4280	4345	4606
	3.33615	7620	3978	4301	4467	4911	5035	6676	6795		6777	3571	3928	4047	4155	4435	4534	4650		6657	3549	3904	3922	4211	4392	4688
	3.38997	7571	3901	4319	4403	4871	5082	6768	6745		6736	3584	3940	3998	4184	4389	4560	4664		6715	3471	3905	3887	4211	4380	4625
	3.44375	7538	3928	4224	4390	4851	5022	6704	6699		6723	3546	3879	3977	4187	4392	4531	4677		6665	3497	3870	3896	4248	4354	4603
	3.4976	7633	3927	4246	4365	4787	5021	6673	6714		6724	3521	3829	3980	4199	4400	4521	4661		6660	3466	3874	3903	4173	4369	4638
	3.55143	7757	3903	4233	4429	4771	5045	6631	6773		6664	3499	3849	3957	4127	4339	4534	4659		6691	3426	3843	3832	4171	4324	4555
	3.60527	7573	3904	4289	4359	4833	5009	6616	6632		6655	3461	3795	3938	4145	4386	4529	4630		6703	3421	3814	3883	4153	4321	4592
	3.65902	7653	3849	4170	4417	4797	4981	6604	6620		6738	3431	3846	3897	4121	4301	4470	4560		6677	3369	3824	3836	4189	4329	4586
	3.71283	7687	3869	4140	4333	4762	5017	6614	6753		6704	3435	3803	3855	4151	4329	4474	4551		6745	3376	3776	3859	4132	4252	4558
	3.76668	7563	3793	4121	4355	4779	4956	6583	6629		6700	3433	3820	3852	4062	4306	4446	4574		6649	3345	3740	3783	4105	4303	4532
	3.82053	7742	3825	4136	4328	4755	4955	6585	6645		6699	3412	3812	3889	4026	4310	4473	4616		6672	3376	3746	3781	4122	4207	4555
	3.87428	7553	3816	4096	4302	4718	4932	6468	6520		6704	3361	3757	3892	4081	4295	4452	4570		6675	3361	3673	3752	4068	4240	4460
	3.92813	7651	3727	4118	4278	4681	4904	6491	6598		6725	3356	3743	3828	4021	4342	4383	4555		6626	3315	3696	3761	4102	4229	4563
	3.98198	7651	3787	4154	4295	4740	4878	6489	6644		6635	3384	3767	3823	4072	4256	4404	4554		6580	3329	3654	3743	4060	4192	4562
	4.03583	7736	3770	4117	4304	4669	4939	6522	6621		6776	3402	3722	3826	4032	4237	4400	4569		6606	3344	3671	3732	4072	4176	4548
	4.08967	7643	3769	4162	4249	4739	4954	6529	6633		6723	3296	3704	3807	4052	4196	4422	4528		6637	3239	3694	3703	4015	4184	4563
	4.14347	7625	3750	4020	4276	4675	4815	6511	6619		6729	3360	3648	3832	4011	4267	4358	4544		6682	3235	3687	3700	4046	4161	4540
	4.1973	7586	3691	4056	4222	4644	4862	6459	6657		6602	3363	3677	3765	3969	4245	4350	4487		6651	3250	3678	3691	4006	4152	4528
	4.25113	7578	3667	4062	4198	4612	4819	6446	6554		6722	3335	3688	3782	3996	4159	4363	4498		6573	3296	3648	3734	3985	4171	4483
	4.30497	7566	3633	4038	4146	4615	4867	6472	6597		6636	3301	3631	3777	3946	4202	4348	4457		6606	3268	3645	3676	3954	4144	4470
	4.35878	7668	3654	3985	4237	4648	4822	6485	6539		6774	3271	3640	3751	3969	4157	4317	4472		6640	3237	3641	3673	3978	4172	4501
	4.41257	7496	3647	3960	4165	4650	4785	6478	6553		6687	3242	3695	3749	3895	4190	4346	4487		6618	3169	3603	3663	3948	4124	4502
	4.46643	7596	3615	4002	4133	4619	4821	6435	6515		6669	3253	3601	3708	3918	4189	4335	4419		6549	3167	3580	3642	3977	4144	4448
	4.52025	7567	3630	3979	4085	4609	4807	6473	6537		6647	3179	3608	3663	3920	4154	4340	4416		6595	3128	3564	3614	3929	4096	4429
	4.57407	7613	3581	4009	4130	4591	4789	6415	6474		6663	3251	3634	3658	3943	4167	4267	4470		6539	3131	3539	3547	3985	4089	4436
	4.6279	7617	3606	3955	4102	4565	4835	6416	6587		6584	3210	3613	3680	3871	4117	4217	4444		6695	3230	3513	3583	3962	4027	4393
	4.68152	7653	3562	3952	4037	4587	4787	6320	6494		6591	3182	3581	3633	3862	4099	4344	4463		6517	3123	3552	3581	3873	4060	4458
	4.73523	7514	3587	4014	4074	4586	4743	6447	6497		6667	3134	3578	3654	3822	4102	4302	4411		6598	3082	3499	3593	3877	4066	4400
	4.7891	7585	3499	3858	4081	4528	4750	6245	6519		6635	3169	3513	3654	3848	4077	4256	4381		6600	3104	3541	3559	3883	4037	4445
	4.84292	7568	3555	3902	4043	4561	4736	6402	6485		6709	3168	3511	3615	3794	4106	4233	4387		6610	3079	3474	3551	3893	4015	4387
	4.89677	7741	3525	3887	4040	4470	4773	6310	6461		6649	3112	3488	3606	3825	4156	4291	4355		6560	3079	3460	3539	3894	4060	4449
	4.9506	7640	3508	3870	3990	4481	4749	6409	6388		6689	3143	3495	3604	3833	4076	4256	4336		6577	3067	3440	3550	3862	4050	4454
	5.00433	7652	3479	3828	4022	4528	4710	6323	6526		6537	3064	3463	3585	3838	4084	4237	4398		6517	3019	3480	3528	3825	3971	4436
	5.05822	7568	3453	3863	3975	4512	4749	6316	6371		6623	3128	3525	3598	3810	4098	4198	4334		6588	3040	3451	3430	3794	3992	4382
	5.11205	7664	3443	3870	4004	4471	4621	6319	6414		6654	3079	3464	3568	3795	4067	4245	4401		6584	3006	3440	3471	3861	3985	4260
	5.16577	7574	3430	3836	3998	4490	4674	6299	6503		6561	3068	3462	3558	3783	4043	4230	4310		6596	2994	3400	3491	3788	3982	4302
	5.21968	7525	3444	3793	3945	4441	4694	6306	6412		6661	3061	3452	3525	3754	4006	4176	4347		6547	2950	3393	3432	3785	3956	4348
	5.27352	7519	3408	3796	3962	4421	4634	6286	6372		6618	3017	3424	3527	3759	3966	4216	4316		6636	2972	3391	3438	3815	3964	4333
	5.3273	7640	3383	3756	3916	4467	4659	6285	6376		6661	3066	3431	3535	3741	3996	4151	4342		6471	3053	3380	3453	3770	3926	4337
	5.38115	7563	3400	3791	3875	4399	4649	6256	6413		6588	3057	3382	3531	3754	3974	4148	4312		6514	2963	3370	3459	3783	3933	4345
	5.43608	7578	3377	3692	3901	4445	4653	6256	6360		6600	2995	3369	3481	3781	4022	4105	4270		6542	2988	3355	3446	3737	3909	4356
	5.50292	7618	3328	3732	3891	4399	4608	6262	6318		6621	2985	3365	3534	3657	3980	4178	4282		6606	2925	3353	3438	3742	3908	4339
	5.56947	7580	3327	3668	3885	4403	4625	6236	6419		6601	2993	3346	3542	3737	3936	4145	4327		6552	2920	3337	3419	3750	3928	4328
	5.63603	7556	3359	3680	3879	4442	4608	6131	6277		6686	2969	3334	3462	3681	3940	4134	4286		6527	2916	3315	3416	3757	3940	4290
	5.70305	7508	3293	3726	3883	4414	4623	6238	6394		6625	2985	3364	3464	3708	3963	4125	4304		6569	2914	3309	3364	3741	3866	4218
	5.76943	7522	3355	3695	3889	4359	4596	6191	6391		6603	2974	3330	3471	3710	3964	4149	4293		6520	2906	3314	3336	3716	3871	4279
	5.83625	7489	3307	3688	3831	4354	4553	6132	6347		6628	2966	3290	3443	3692	3955	4148	4251		6592	2924	3337	3352	3686	3873	4265
	5.90283	7646	3293	3666	3818	4378	4605	6139	6296		6579	2941	3296	3463	3689	3925	4134	4314		6654	2852	3263	3398	3724	3923	4278
	5.96938	7572	3247	3691	3848	4391	4574	6139	6385		6624	2917	3315	3503	3700	3918	4138	4298		6570	2859	3278	3321	3699	3838	4251
	6.0362	7519	3214	3619	3879	4402	4560	6092	6176		6541	2894	3259	3428	3677	3922	4110	4235		6541	2863	3262	3365	3723	3866	4267
	6.10277	7512	3247	3596	3752	4291	4521	6151	6305		6562	2898	3291	3437	3656	3976	4088	4284		6532	2830	3290	3322	3631	3854	4281
	6.16958	7489	3236	3622	3769	4297	4542	6025	6306		6607	2891	3258	3418	3624	3917	4110	4272		6536	2831	3279	3316	3645	3828	4232
	6.23617	7538	3223	3658	3792	4366	4483	6018	6355		6596	2896	3245	3376	3630	3894	4057	4244		6555	2808	3221	3288	3648	3881	4228
	6.30303	7571	3248	3641	3793	4305	4580	6064	6379		6579	2845	3195	3382	3666	3880	4077	4225		6511	2788	3164	3272	3682	3834	4185
	6.36973	7655	3188	3645	3773	4334	4480	6086	6238		6564	2856	3246	3377	3547	3883	4080	4234		6530	2829	3160	3279	3645	3824	4156
	6.43617	7710	3219	3596	3799	4309	4535	6120	6312		6641	2814	3207	3372	3601	3846	4067	4173		6496	2788	3194	3280	3627	3855	4177
	6.50298	7473	3196	3577	3764	4291	4553	6071	6276		6619	2830	3229	3335	3625	3883	4085	4228		6528	2756	3182	3291	3623	3862	4186
	6.56955	7608	3224	3549	3744	4321	4546	6109	6279		6593	2809	3217	3339	3605	3851	4044	4204		6515	2792	3174	3211	3612	3769	4210
	6.63632	7538	3143	3560	3775	4304	4466	6111	6205		6582	2807	3246	3388	3589	3850	4038	4161		6548	2719	3142	3257	3624	3809	4194
	7.46628	7103	576	572	558	609	688	731	801		7400	603	609	650	663	699	762	812		7432	670	806	654	656	716	825
	7.52002	7214	545	571	549	599	646	741	794		7403	570	612	656	657	701	735	807		7458	628	763	648	624	698	798
	7.57372	7041	533	534	535	604	641	720	789		7467	572	599	626	664	673	735	796		7481	615	734	622	641	674	808
	7.62755	7107	532	528	533	599	638	720	802		7465	586	603	631	642	670	736	799		7536	594	701	610	629	697	788
	7.6813	7088	516	521	541	597	632	720	804		7495	550	593	633	648	675	724	784		7385	587	684	617	626	679	799
	7.7352	7160	507	534	523	608	608	716	770		7365	569	608	618	648	667	723	790		7401	620	672	611	622	666	795
	7.78897	7188	512	531	533	605	628	716	803		7531	555	595	615	647	665	733	796		7384	573	663	605	603	658	796
	7.84278	7100	507	525	534	589	614	707	811		7438	562	597	624	630	681	729	788		7341	576	659	609	630	678	775
	7.8966	7139	505	528	531	578	625	729	797		7411	556	590	613	626	696	721	782		7325	570	633	602	629	675	794
	7.95042	7119	500	520	528	585	606	706	775		7461	567	597	615	625	694	721	789		7440	565	635	624	615	669	796
	8.0043	7012	499	512	535	587	607	701	787		7450	557	582	606	620	674	704	807		7421	562	630	616	620	663	784

## Sheet: Fig3D
Elen-ts
Lipid to protein ratio 50
Manganese titration
NORMALIZED DATA																																							Concentrations
		Concentrations (uM)																																					Mean	SEM	N
	Time norm	0	1	5	10	50	200	400		0	1	5	10	25	50	200	400		0	1	5	10	25	50	200	400		0	1	5	10	25	50	200	400			Time (min)	0 Mn2+			1 μM Mn2+			5 μM Mn2+			10 μM Mn2+
	-9.0235	99.1533	102.216	106.047	109.798	115.053	126.531	145.969		122.134	126.518	132.145	143.208	139.246	152.644	170.669	218.138		124.932	125.653	136.124	134.32	138.063	147.63	167.027	192.496		117.586	127.887	127.831	135.62	140.866	155.826	201.49	262.763			-9.0235	115.951	5.80027	4	120.569	6.13469	4	125.537	6.71356	4	130.737	7.24942
	-8.94178	97.9051	101.976	105.672	107.592	113.399	123.591	145.18		117.127	125.072	129.644	139.928	136.927	148.213	167.07	211.63		119.914	123.081	133.368	129.43	136.75	143.585	163.732	189.297		118.399	124.281	127.11	134.297	143.214	153.247	201.112	264.097			-8.94178	113.336	5.17515	4	118.602	5.55721	4	123.949	6.2262	4	127.811	7.07294
	-8.8601	94.854	99.9174	105.305	108.147	112.197	122.842	143.185		113.547	122.799	128.123	135.3	133.399	144.756	164.066	203.814		117.682	121.211	131.508	128.691	133.105	139.702	161.37	186.544		115.041	125.288	124.557	132.076	145.181	151.623	198.77	262.941			-8.8601	110.281	5.21298	4	117.304	5.85594	4	122.373	5.86366	4	126.054	6.11939
	-8.77843	95.1022	99.4741	103.414	106.505	110.527	122.815	136.859		111.742	120.322	125.915	134.912	131.295	142.232	160.553	202.027		116.746	118.546	128.525	125.579	128.678	137.523	157.141	181.487		114.988	123.084	125.338	132.882	142.305	151.353	200.804	264.008			-8.77843	109.645	4.957	4	115.356	5.3758	4	120.798	5.83597	4	124.969	6.47285
	-8.69678	92.0657	98.1893	103.469	104.887	108.788	115.98	135.394		110.577	118	123.776	130.728	130.059	141.25	158.143	203.374		115.099	114.634	126.1	123.389	127.846	135.765	155.514	183.239		115.135	123.682	123.941	131.544	142.172	150.379	198.368	259.976			-8.69678	108.219	5.48982	4	113.627	5.47397	4	119.321	5.31058	4	122.637	6.19422
	-8.61485	91.9051	91.8557	102.203	103.089	107.876	113.419	135.061		109.412	116.823	122.736	129.001	128.394	138.91	157.192	192.345		112.236	114.884	125.222	121.594	128.85	134.345	152.089	179.934		114.548	122.762	124.166	131.331	142.156	149.567	197.185	260.955			-8.61485	107.025	5.14832	4	111.581	6.78539	4	118.582	5.48322	4	121.254	6.40083
	-8.53317	91.438	91.5252	100.18	100.556	106.137	113.87	133.202		109.242	117.257	120.794	128.179	127.319	139.073	156.955	192.971		110.496	114.439	124.848	121.082	126.328	133.033	149.558	174.183		113.616	120.602	122.71	128.837	141.18	148.936	195.434	259.413			-8.53317	106.198	5.00516	4	110.956	6.59813	4	117.133	5.71135	4	119.663	6.60667
	-8.45147	91.9124	91.0669	98.8749	100.449	103.81	113.329	131.55		109.165	116.079	119.771	127.447	126.862	137.889	154.836	191.678		110.972	113.715	123.622	121.326	123.926	131.22	147.911	173.359		113.882	120.091	122.079	129.962	139.676	146.627	195.198	257.308			-8.45147	106.483	4.95304	4	110.238	6.5244	4	116.087	5.79157	4	119.796	6.69894
	-8.3697	89.7737	90.3832	99.8281	98.2267	104.211	112.652	131.29		108.193	115.237	119.943	125.088	124.982	135.443	153.28	194.345		109.832	112.717	122.874	119.203	123.565	130.524	148.03	174.465		113.456	119.872	122.544	128.548	137.824	146.086	190.939	254.847			-8.3697	105.314	5.2954	4	109.552	6.55921	4	116.298	5.52878	4	117.766	6.79279
	-8.2878	90.6277	90.0826	96.906	98.7824	102.208	112.264	130.522		107.383	114.404	119.136	124.193	124.678	134.759	153.626	190.904		109.38	111.798	121.083	117.886	123.96	129.23	146.462	168.784		110.152	118.879	120.502	128.274	137.114	144.751	191.72	252.861			-8.2878	104.386	4.6229	4	108.791	6.40512	4	114.407	5.84781	4	117.284	6.52679
	-8.20588	88.3796	90.6461	95.3434	97.7772	102.003	110.398	130.21		106.851	114.224	118.775	124.013	124.937	133.526	152.75	183.582		106.968	111.798	120.753	117.961	121.918	126.73	145.548	166.573		111.378	117.492	121.598	126.327	136.766	144.066	191.247	251.705			-8.20588	103.394	5.1145	4	108.54	6.07755	4	114.117	6.28586	4	116.52	6.49158
	-8.12407	88.6496	88.9406	95.5778	95.8241	101.85	110.416	130.366		106.843	112.229	116.515	123.687	124.337	133.381	153.518	181.942		107.343	109.998	118.718	115.26	121.566	126.132	144.367	168.749		109.153	117.287	120.261	126.327	136.27	143.543	187.935	249.452			-8.12407	102.997	4.80815	4	107.114	6.24664	4	112.768	5.78144	4	115.275	6.89958
	-8.04237	86.854	89.6469	95.4293	95.0151	100.452	110.659	130.179		105.886	111.722	116.395	121.157	122.672	133.362	150.103	179.968		107.468	110.808	118.666	115.931	120.271	126.569	144.278	162.468		109.059	116.411	119.42	125.171	135.229	142.695	186.586	250.282			-8.04237	102.317	5.19483	4	107.147	5.96111	4	112.478	5.71902	4	114.319	6.70673
	-7.96048	87.5255	88.9557	94.4996	94.3205	100.861	110.74	129.005		108.031	112.172	116.953	122.621	123.881	132.621	147.39	178.501		107.187	109.437	119.588	115.218	120.108	125.516	143.881	160.809		107.434	115.521	117.558	124.654	133.245	140.386	185.758	244.619			-7.96048	102.544	5.00943	4	106.521	5.98586	4	112.15	5.91026	4	114.203	6.93078
	-7.87887	87.4307	89.1134	94.3589	94.3532	99.5823	110.1	127.395		106.48	112.368	116.145	121.97	121.696	133.632	149.238	179.341		107.522	109.218	118.997	115.982	119.842	126.033	142.878	164.291		107.82	115.082	117.888	123.483	132.088	138.672	184.978	243.552			-7.87887	102.313	4.96925	4	106.446	5.90032	4	111.847	5.85893	4	113.947	6.72905
	-7.79715	88.219	88.2795	92.5775	94.1489	98.7214	109.613	127.883		105.616	111.592	115.097	121.726	122.591	131.436	148.622	180.208		106.414	109.211	117.597	114.941	120.185	123.837	142.362	164.185		108.94	113.622	117.948	122.433	130.187	139.159	182.399	247.524			-7.79715	102.297	4.74592	4	105.676	5.8685	4	110.805	6.10886	4	113.312	6.60732
	-7.71522	87.0876	88.2119	91.9447	93.7158	99.3522	108.612	126.969		105.809	111.698	115.329	121.03	121.221	130.666	148.795	175.033		105.4	109.343	116.771	113.616	119.473	124.417	141.439	160.115		105.382	113.841	113.488	121.49	131.03	138.005	181.524	241.654			-7.71522	100.92	4.61179	4	105.774	5.92553	4	109.383	5.8515	4	112.463	6.50437
	-7.63355	85.1387	88.3922	91.4681	92.8577	98.6447	108.053	125.701		106.457	111.322	114.513	121.527	120.299	130.251	146.86	180.568		106.773	108.572	116.554	113.884	119.113	123.551	140.774	161.291		104.01	112.922	114.479	119.589	130.187	138.438	179.3	239.371			-7.63355	100.595	5.18892	4	105.302	5.70766	4	109.253	5.94823	4	111.965	6.57229
	-7.5517	83.5985	88.0917	90.6633	92.2693	98.031	107.999	125.857		104.143	110.962	114.384	120.145	120.765	129.144	144.98	179.488		105.057	108.665	116.893	112.466	119.01	122.927	138.938	158.774		106.715	112.425	113.037	120.441	128.914	137.789	180.341	238.897			-7.5517	99.8782	5.45258	4	105.036	5.70089	4	108.744	6.07968	4	111.33	6.61633
	-7.46978	83.8175	88.5725	90.8274	92.4001	98.0651	107.133	125.203		104.914	110.725	114.272	118.59	121.078	129.394	146.601	175.14		104.471	107.995	115.954	112.844	117.74	122.284	138.918	157.951		106.635	111.914	114.043	120.654	128.848	136.328	179.276	238.008			-7.46978	99.9595	5.40084	4	104.802	5.47157	4	108.774	5.99739	4	111.122	6.45566
	-7.38813	85.1971	86.6642	86.8974	91.5094	97.673	107.764	125.41		104.721	109.818	114.289	117.75	118.84	128.065	145.11	179.328		106.664	106.67	115.615	111.879	116.702	121.721	139.871	160.55		104.53	111.754	113.322	119.437	128.484	137.247	180.293	235.577			-7.38813	100.278	5.05007	4	103.726	5.78306	4	107.531	6.89388	4	110.144	6.4192
	-7.30622	83.2555	87.3854	87.7881	92.4655	97.9202	108.648	123.946		105.809	108.657	114.195	118.5	119.869	127.93	145.066	178.208		104.791	106.857	115.432	111.955	116.428	120.445	137.34	157.622		102.771	111.316	113.698	119.65	127.823	136.977	180.199	233.976			-7.30622	99.1568	5.33791	4	103.554	5.46668	4	107.778	6.67334	4	110.643	6.29154
	-7.22432	83.7591	87.5657	86.6083	92.0487	96.582	107.683	124.455		103.603	108.935	112.794	118.437	118.598	128.007	145.023	173.073		103.613	106.242	115.041	110.898	114.498	119.23	136.476	158.657		105.635	109.68	113.548	118.373	127.608	135.281	177.62	231.634			-7.22432	99.1526	5.15337	4	103.106	5.23233	4	106.998	6.8125	4	109.939	6.22036
	-7.14267	82.3504	86.9572	87.3037	92.016	97.7497	106.475	123.914		103.834	109.107	112.167	117.189	119.457	128.373	144.915	177.727		103.246	107.301	114.919	110.797	115.467	119.32	135.335	160.021		104.103	111.126	112.767	117.536	126.368	134.091	177.999	233.086			-7.14267	98.3836	5.3474	4	103.623	5.60981	4	106.789	6.52195	4	109.385	5.99321
	-7.06077	83.3942	86.8219	87.6084	93.0539	97.7753	106.448	123.914		103.541	107.774	112.562	117.361	117.111	127.507	142.538	176.994		102.364	106.101	114.963	109.53	115.287	119.498	135.315	157.045		102.651	109.68	114.118	116.532	127.31	135.263	177.313	232.642			-7.06077	97.9877	4.87096	4	102.594	5.30808	4	107.313	6.58696	4	109.119	5.63579
	-6.9789	83.4818	86.9346	87.0146	92.0977	97.2724	106.159	123.281		102.723	108.256	112.219	114.993	118.32	125.59	143.445	175.247		102.669	104.746	114.206	109.128	114.3	118.757	136.199	157.88		103.73	108.746	111.385	115.848	125.327	134.343	175.656	228.283			-6.9789	98.151	4.89584	4	102.171	5.15619	4	106.206	6.42446	4	108.017	5.51246
	-6.897	83.3358	86.4538	86.8349	91.1907	97.3832	105.871	123.478		103.078	107.496	112.227	117.723	116.95	125.368	142.883	174.447		102.372	104.348	112.815	109.572	114.549	118.775	135.305	157.786		101.239	109.359	112.496	115.437	125.029	133.784	176.295	231.367			-6.897	97.5063	4.73867	4	101.914	5.2562	4	106.093	6.42061	4	108.481	6.01347
	-6.81512	83.3212	86.7092	86.538	91.0762	97.7242	105.339	121.993		102.476	107.463	112.073	115.346	117.479	126.197	143.218	173.246		101.373	104.075	113.476	109.48	114.12	118.686	134.084	156.598		100.16	108.585	112.902	115.711	124.368	134.885	177.147	228.135			-6.81512	96.8327	4.52863	4	101.708	5.09074	4	106.247	6.57599	4	107.903	5.78781
	-6.73328	82.1825	86.8971	87.1943	91.0027	97.5622	104.545	122.231		102.6	107.39	111.308	115.111	117.183	125.725	141.857	174.633		101.155	103.873	113.702	108.23	113.048	119.052	134.839	157.045		101.146	107.899	111.76	115.316	124.583	132.882	173.906	228.698			-6.73328	96.7708	4.87475	4	101.515	4.95405	4	105.991	6.28708	4	107.415	5.71308
	-6.65152	83.7956	86.1157	87.1943	90.0221	96.4627	105.654	121.307		102.021	106.858	110.998	114.677	116.691	125.301	142.365	176.42		101.436	103.522	113.154	108.381	112.645	117.141	133.012	157.916		102.505	108.322	111.129	114.449	123.244	134.073	176.082	226.534			-6.65152	97.4394	4.55316	4	101.205	5.12897	4	105.619	6.16139	4	106.882	5.80603
	-6.56962	83.7299	86.5214	86.8193	91.019	95.7126	104.906	122.699		100.802	106.94	111.041	114.252	116.037	124.367	141.554	175.754		102.396	104.356	112.285	107.735	112.276	116.963	133.806	156.563		99.8268	108.571	110.303	114.753	122.896	131.8	171.99	224.785			-6.56962	96.6887	4.35189	4	101.597	5.09956	4	105.112	6.11134	4	106.94	5.54239
	-6.4877	81.219	87.0098	86.6474	91.5584	95.7808	105.33	121.151		101.659	105.591	111.514	113.412	116.529	124.299	140.311	173.593		100.32	102.735	111.902	107.508	112.619	116.061	133.012	155.163		100.04	107.972	111.114	113.597	122.549	132.81	174.142	227.186			-6.4877	95.8094	4.87628	4	100.827	4.72852	4	105.295	6.21779	4	106.519	5.18336
	-6.40603	83.5693	85.6198	87.2724	89.875	94.613	104.094	121.691		101.944	105.927	110.887	113.972	115.625	124.386	140.69	175.287		101.412	102.104	112.806	106.443	113.228	115.874	131.921	154.481		101.545	108.162	110.769	114.327	121.772	130.934	173.48	226.178			-6.40603	97.1178	4.51757	4	100.453	5.10012	4	105.434	6.07173	4	106.154	5.72283
	-6.32418	81.1971	86.4463	86.5458	89.1313	95.687	104.094	120.341		101.204	104.496	111.17	113.439	115.473	123.76	140.754	175.7		100.421	103.374	112.537	107.047	111.144	116.222	131.236	153.752		102.065	108.468	110.889	112.882	123.045	131.728	173.693	220.99			-6.32418	96.2217	5.01946	4	100.696	4.87405	4	105.286	6.25694	4	105.625	5.68466
	-6.24225	83.3942	85.4846	87.0459	89.687	94.9199	104.058	120.736		100.262	106.262	110.981	113.339	116.52	124.039	140.128	169.939		101.046	103.242	112.389	107.332	112.027	115.9	131.99	153.611		101.119	106.395	110.424	111.498	122.268	132.269	174.521	223.243			-6.24225	96.4553	4.35802	4	100.346	5.00695	4	105.21	6.06881	4	105.464	5.40706
	-6.16058	82.0146	86.1232	86.749	89.2049	94.6386	103.932	120.476		100.255	105.134	110.234	113.755	114.362	122.701	140.819	172.699		100.429	102.127	113.041	107.072	110.363	116.231	132.328	157.139		98.6544	107.651	108.05	113.46	121.855	131.475	172.415	220.16			-6.16058	95.3382	4.45912	4	100.259	4.84521	4	104.519	6.01063	4	105.873	5.76596
	-6.0787	80.6277	86.0406	86.4755	89.1885	96.0194	102.291	120.725		100.432	105.591	110.01	113.592	114.13	125.108	139.792	171.606		100.234	102.369	112.172	106.577	112.533	115.258	131.434	155.175		101.465	106.059	109.117	112.608	121.061	130.628	171.445	220.249			-6.0787	95.6898	5.02795	4	100.015	4.72983	4	104.444	6.0236	4	105.492	5.65126
	-5.99688	80.854	85.7025	86.5224	88.9515	95.15	103.76	119.447		99.6065	105.853	109.976	113.005	115.697	122.922	139.112	171.699		98.6812	102.883	112.102	106.342	112.387	116.793	130.144	153.129		97.5486	106.439	110.318	111.057	120.632	129.87	171.966	220.368			-5.99688	94.1726	4.45943	4	100.219	4.90116	4	104.73	6.08698	4	104.839	5.47737
	-5.91517	82.5693	85.4245	86.5146	87.9055	94.2124	102.696	119.427		101.15	106.196	111.205	112.399	115.133	122.855	139.349	172.819		100.679	103.109	111.633	105.545	110.955	116.052	131.067	154.94		100.24	105.154	108.035	112	119.838	130.321	169.6	219.686			-5.91517	96.1594	4.53382	4	99.971	4.89105	4	104.347	5.99799	4	104.463	5.73814
	-5.83325	80.8613	85.8753	86.6865	88.2569	94.417	103.4	120.289		100.378	104.995	109.907	113.294	114.371	122.855	139.068	172.486		100.819	101.878	112.128	107.055	110.92	114.838	130.63	152.223		99.2539	106.059	109.387	110.586	119.226	130.61	169.316	219.241			-5.83325	95.3282	4.83353	4	99.7018	4.69344	4	104.527	5.97657	4	104.798	5.65969
	-5.75153	82.0584	85.4621	87.3896	88.9842	93.522	102.372	119.053		99.4754	104.594	109.22	112.671	114.658	122.932	140.236	171.366		99.1728	102.603	112.711	106.216	111.512	115.24	130.908	153.258		97.4154	105.694	108.952	112.183	119.921	130.447	170.476	219.063			-5.75153	94.5305	4.1821	4	99.5883	4.752	4	104.568	5.78976	4	105.013	5.54083
	-5.6697	80.8394	85.5447	85.3348	87.8728	95.1671	103.084	119.167		99.9151	105.093	109.495	112.282	114.165	123.076	139.155	169.765		100.109	103.016	112.363	106.477	111.512	115.633	130.323	154.575		97.5087	105.592	108.546	110.084	119.028	131.385	167.779	218.085			-5.6697	94.5931	4.62255	4	99.8113	4.78814	4	103.935	6.25283	4	104.179	5.56547
	-5.5878	79.9635	85.5372	85.8973	88.1507	93.4282	102.714	118.408		99.9846	105.166	109.718	111.884	114.765	123.808	138.29	171.566		100.39	103.195	111.45	106.384	110.766	115.115	130.561	152.693		98.9608	105.534	109.297	110.57	119.111	128.662	168.441	216.336			-5.5878	94.8248	4.96288	4	99.858	4.80116	4	104.091	6.08232	4	104.247	5.4922
	-5.50612	80.2555	84.4027	86.0927	88.069	92.8827	102.354	118.918		99.7917	105.338	108.653	112.743	114.04	122.508	139.274	171.632		98.7515	101.94	111.328	106.871	111.444	114.82	131.494	152.67		95.9766	104.541	107.239	110.433	119.97	129.293	168.488	217.966			-5.50612	93.6938	4.55123	4	99.0554	4.93782	4	103.328	5.80744	4	104.529	5.61804
	-5.42422	82.2993	84.9812	87.1006	88.3877	93.7436	103.003	120.289		99.7068	105.428	109.194	112.39	114.264	123.731	138.874	168.885		99.6098	102.283	110.972	106.468	110.749	115.124	130.025	154.364		100.12	104.147	108.05	109.779	117.904	128.012	168.204	216.691			-5.42422	95.434	4.37963	4	99.2097	4.78657	4	103.829	5.60853	4	104.256	5.42659
	-5.34255	82.4453	84.9587	86.1708	87.595	93.1129	102.137	118.762		99.568	105.526	110.371	112.535	113.807	123.115	138.301	170.672		100.101	103.117	111.311	106.2	110.088	114.499	129.866	152.035		98.4013	104.22	108.02	109.156	118.334	128.427	166.099	215.031			-5.34255	95.129	4.24278	4	99.4553	4.85723	4	103.968	5.97275	4	103.871	5.57768
	-5.26075	82.0511	85.6273	85.6395	87.881	93.7777	101.93	117.712		99.8457	105.232	109.959	111.704	113.798	122.219	138.798	170.152		99.4304	101.13	111.485	106.837	110.286	115.981	128.883	151.764		96.9624	103.928	108.261	109.354	118.615	128.139	168.133	215.921			-5.26075	94.5724	4.222	4	98.9792	4.5321	4	103.836	6.10114	4	103.944	5.44568
	-5.17902	81.5547	84.3276	86.2724	87.4888	92.7975	102.39	117.141		99.4445	104.749	109.529	111.667	114.9	122.113	139.058	170.712		99.1806	101.574	112.128	105.503	111.041	114.606	130.134	151.329		98.5745	104.409	107.39	109.962	118.334	128.896	168.654	215.565			-5.17902	94.6886	4.38174	4	98.7651	4.86486	4	103.83	5.93213	4	103.655	5.54332
	-5.09725	81.5985	85.0413	86.1864	87.358	93.0958	101.136	118.086		100.262	105.027	110.027	111.93	113.225	122.691	138.496	169.699		98.4705	101.87	111.998	105.461	110.955	114.329	129.211	154.587		98.4279	103.606	106.654	108.593	117.441	128.193	165.531	214.705			-5.09725	94.6898	4.38465	4	98.8863	4.65993	4	103.716	5.94657	4	103.336	5.48711
	-5.01537	82.292	84.6131	86.4599	87.6195	93.1469	102.254	118.221		98.9585	105.518	109.246	111.731	115.115	121.93	139.641	171.446		98.5486	101.652	110.981	105.789	109.857	113.874	129.935	151.235		98.7077	103.037	107.194	108.563	118.334	127.327	165.46	216.751			-5.01537	94.6267	4.11244	4	98.705	4.76487	4	103.47	5.72264	4	103.425	5.40664
	-4.93357	81.7226	85.2141	85.4989	87.5787	92.5418	101.623	117.453		99.9074	105.068	109.28	112.164	114.094	121.824	137.804	168.365		99.2353	102.447	110.111	105.73	110.294	114.981	129.648	152.329		97.2822	104.117	107.39	109.065	117.54	127.724	166.69	213.163			-4.93357	94.5369	4.30754	4	99.2117	4.6972	4	103.07	5.88463	4	103.634	5.51081
	-4.85193	82.1679	84.3501	85.6395	87.4806	92.6867	102.841	118.762		100.787	104.684	108.593	111.866	112.742	121.757	138.582	169.499		99.5708	102.681	110.181	105.688	109.848	114.517	129.409	152.764		97.109	103.037	105.557	109.384	116.78	129.455	165.697	214.023			-4.85193	94.9086	4.31527	4	98.6879	4.79915	4	102.493	5.69895	4	103.605	5.52252
	-4.7703	80.6204	84.3727	85.1473	87.7748	93.0447	100.983	117.193		100.71	105.256	109.478	113.52	115.401	121.959	138.928	170.872		99.0792	100.678	111.328	105.789	109.591	115.293	131.653	152.411		97.8684	102.292	106.083	108.669	117.722	127.002	166.075	215.535			-4.7703	94.5695	4.68597	4	98.1498	4.68921	4	103.009	6.05218	4	103.938	5.61898
	-4.68838	81.6204	83.6664	85.1785	86.4428	93.0788	100.271	116.829		99.6605	104.128	110.655	113.412	114.076	121.603	137.663	168.125		99.2041	102.26	111.833	105.185	110.449	114.811	130.968	151.67		94.0181	102.774	105.752	108.624	116.184	128.301	165.247	216.395			-4.68838	93.6258	4.20137	4	98.2071	4.86289	4	103.355	6.20007	4	103.416	5.90376
	-4.60677	79.2336	83.426	85.3426	86.0096	91.7405	100.965	116.923		100.093	103.924	110.062	112.86	114.721	121.969	137.998	169.165		99.2509	101.808	110.668	105.268	109.522	115.159	129.161	151.282		95.5902	101.475	104.1	108.152	117.656	126.317	165.2	215.298			-4.60677	93.5418	4.8685	4	97.6581	4.77492	4	102.543	5.92188	4	103.073	5.89893
	-4.52512	79.5474	83.2832	86.1083	85.7645	91.1354	100.325	115.739		99.9846	104.488	108.945	111.432	113.718	121.68	137.458	169.432		98.0882	100.849	110.572	106.418	110.183	114.588	130.372	150.553		97.6019	102.847	107.555	108.183	116.796	127.561	164.798	215.802			-4.52512	93.8055	4.7804	4	97.8669	4.91781	4	103.295	5.76198	4	102.949	5.82164
	-4.4432	82.3723	82.885	84.53	86.6961	91.2888	100.478	115.728		99.7686	103.466	108.627	111.984	112.858	121.371	137.772	168.698		98.3301	102.33	110.537	106.116	110.946	114.008	128.169	150.765		95.0573	102.935	104.896	109.049	116.565	127.273	164.94	214.379			-4.4432	93.882	3.96119	4	97.9039	5.01166	4	102.148	5.9882	4	103.461	5.71531
	-4.36087	79.0438	83.2682	85.0066	86.2875	91.0586	99.6212	117.411		99.1591	104.226	110.045	111.586	112.795	121.121	137.274	170.832		98.4081	100.81	110.389	105.168	109.505	113.436	128.645	154.105		94.8708	101.518	107.375	108.639	116.598	128.229	167.14	214.527			-4.36087	92.8704	4.70275	4	97.4559	4.78614	4	103.204	6.10303	4	102.92	5.69721
	-4.27915	81.1679	82.9226	84.7332	86.0342	90.2318	99.8106	116.144		100.609	104.717	109.649	111.64	113.798	121.949	139.36	171.379		98.533	101.294	109.929	105.453	109.213	114.32	128.476	151.376		96.3363	101.708	104.431	108	115.308	127.652	165.815	213.341			-4.27915	94.1617	4.41824	4	97.6603	4.97141	4	102.186	5.95323	4	102.782	5.7251
	-2.92068	86.0438	88.5349	92.5307	91.7137	101.952	113.788	131.924		90.2253	94.5475	98.4705	99.765	101.513	109.66	128.964	150.48		91.5802	92.7141	99.1567	96.7953	98.4215	100.982	116.695	143.837		101.719	107.972	112.421	117.049	124.731	138.041	172.747	226.297			-2.92068	92.392	3.32464	4	95.9421	4.20267	4	100.645	4.19784	4	101.331	5.49686
	-2.83908	85.8467	88.0766	92.0853	91.4031	100.938	111.579	129.857		88.6823	94.5312	97.1559	99.9096	101.665	109.997	128.304	151.267		92.7195	93.0803	98.8785	96.9379	99.0478	102.473	117.787	139.885		103.051	106.658	109.387	115.757	123.789	135.606	172.486	225.882			-2.83908	92.5748	3.76595	4	95.5865	3.9409	4	99.3767	3.63495	4	101.002	5.22454
	-2.75742	85.8175	88.7153	90.0773	91.3377	100.349	111.777	129.431		89.3458	94.7519	98.5307	99.3674	101.173	109.467	128.045	154.401		92.1732	93.1271	98.5742	96.5688	98.2843	100.839	116.854	140.685		104.49	106.76	108.847	115.148	122.004	135.624	172.818	226.06			-2.75742	92.9566	4.05823	4	95.8386	3.8574	4	99.0072	3.84023	4	100.606	5.1252
	-2.67562	83.6423	88.0391	91.5853	90.8147	100.145	112.273	128.911		89.0063	93.5175	97.912	98.6624	102.077	110.431	127.256	152.507		92.2747	92.7453	98.8872	96.1913	98.2929	101.107	115.841	139.649		102.038	106.643	109.928	115.179	122.615	135.841	171.493	224.726			-2.67562	91.7404	3.86639	4	95.2363	3.9904	4	99.5781	3.8107	4	100.212	5.25101
	-2.594	85.0146	86.9121	91.515	90.3571	99.7358	111.254	128.87		89.9861	94.1633	98.0323	98.1654	100.528	109.708	126.283	154.334		92.1264	92.9401	99.5566	97.1644	97.5894	100.616	116.179	140.767		101.572	106.921	111.325	114.449	121.177	134.289	172.132	221.554			-2.594	92.1748	3.46855	4	95.2341	4.20557	4	100.107	4.12581	4	100.034	5.10842
	-2.51205	84.4526	87.6484	91.5462	90.7739	98.9175	110.389	127.706		89.3304	94.2369	98.9431	99.2228	101.406	109.467	127.04	152.694		92.9458	92.792	100.104	97.9111	97.4522	101.107	116.506	138.567		100.946	107.111	110.063	113.49	121.408	133.694	170.31	220.338			-2.51205	91.9186	3.47597	4	95.447	4.13692	4	100.164	3.80518	4	100.35	4.7574
	-2.43013	84.9781	87.1525	90.4914	89.6707	99.3948	110.452	126.875		89.2069	95.0789	99.3212	100.199	101.415	109.766	127.116	150.867		91.229	93.5868	98.409	96.5185	97.8811	100.875	116.774	141.39		101.852	105.212	108.576	113.141	120.218	134.019	172.155	220.457			-2.43013	91.8165	3.58966	4	95.2577	3.73735	4	99.1994	3.70125	4	99.8822	4.92847
	-2.34848	83.1022	86.6717	89.6164	89.2866	98.7982	111.877	128.028		89.3921	93.5829	98.5736	98.7438	102.364	108.524	128.056	154.855		91.6114	93.3842	100.183	97.5168	98.7647	101.75	118.144	141.896		101.266	106.746	109.387	113.445	121.541	132.305	170.523	220.901			-2.34848	91.3428	3.76662	4	95.0961	4.20218	4	99.44	4.0492	4	99.748	5.02521
	-2.26665	82.6642	87.1225	91.1946	89.973	99.7699	110.497	127.717		89.6852	96.0598	99.3899	99.6023	102.158	109.217	127.894	153.788		91.0652	93.1037	100.591	96.3423	98.8505	101.928	117.439	140.732		101.439	106.921	110.589	113.932	120.284	133.838	171.99	222.739			-2.26665	91.2134	3.87303	4	95.8017	4.14635	4	100.441	3.97493	4	99.9623	5.06755
	-2.1849	85.1314	87.7536	90.4446	90.21	100.085	110.668	127.685		88.5126	94.0898	97.7058	99.9187	101.961	110.546	127.353	151.814		91.3461	92.9245	98.9915	97.4581	98.3529	102.161	116.05	140.685		99.5737	105.636	110.063	113.354	121.309	134.055	171.777	224.103			-2.1849	91.1409	3.08459	4	95.1009	3.77192	4	99.3012	4.05072	4	100.235	4.83399
	-2.10332	84.6277	88.58	90.8196	90.6268	100.034	110.326	129.763		88.7132	94.1797	98.5736	99.53	103.223	109.419	127.742	152.894		91.8923	92.2699	97.9134	96.6946	98.413	101.937	117.548	141.825		102.638	106.176	109.688	115.407	122.433	132.955	170.759	221.791			-2.10332	91.9678	3.85493	4	95.3014	3.80662	4	99.2486	3.89721	4	100.565	5.28439
	-2.0216	84.3723	87.3929	91.2337	89.8913	99.0027	110.524	128.039		88.7132	93.5911	97.5855	98.2648	101.979	108.938	128.92	154.001		90.8076	92.4024	97.3744	96.8372	98.3958	100.232	116.03	139.073		101.159	105.869	109.943	112.167	120.516	134.957	169.671	222.146			-2.0216	91.263	3.56048	4	94.814	3.92224	4	99.0341	3.92324	4	99.2902	4.66572
	-1.93977	83.1898	87.3554	90.9212	90.0548	99.2414	109.352	127.976		88.7826	94.4004	98.2042	99.0962	100.278	108.533	127.796	153.948		90.0897	93.2128	98.3394	95.9983	97.1605	99.9375	115.553	140.449		100.786	108.103	109.147	112.608	120.102	133.766	169.742	222.058			-1.93977	90.712	3.67626	4	95.768	4.39065	4	99.1529	3.75503	4	99.4394	4.77365
	-1.85787	83.7591	88.8505	90.4446	89.5317	98.3208	109.433	127.291		88.852	93.2396	97.912	98.5901	101.477	108.755	126.359	153.761		90.1131	91.8413	99.6348	95.755	97.6323	100.295	115.643	142.472		102.025	105.753	110.784	113.536	122.4	132.648	170.499	218.441			-1.85787	91.1873	3.86481	4	94.921	3.72478	4	99.6939	4.20039	4	99.3533	5.09202
	-1.77595	82.9927	88.0541	91.2571	89.9894	99.1732	109.216	127.852		88.7363	93.7628	96.5372	98.3823	100.322	107.715	127.051	153.561		91.3383	92.1297	97.7656	96.2081	97.4264	100.768	116.139	139.297		99.7335	106.483	109.748	114.175	120.119	132.359	169.813	221.376			-1.77595	90.7002	3.47936	4	95.1073	3.97724	4	98.8269	3.90442	4	99.6887	5.14578
	-1.69405	85.5401	87.9489	91.0774	90.1446	98.9431	109.406	125.836		88.3737	92.6102	96.6661	98.7076	101.594	109.294	127.732	152.134		90.5345	91.4595	97.244	95.5201	96.8259	100.25	115.702	139.379		99.8135	105.183	109.628	112.167	119.954	133.369	169.553	220.279			-1.69405	91.0655	3.0901	4	94.3004	3.76059	4	98.6537	3.91325	4	99.1349	4.68968
	-1.61242	83.927	87.9038	91.9056	91.0272	98.1589	109.279	127.145		87.3013	92.9208	97.4136	98.084	100.484	108.764	126.132	154.495		90.4565	92.005	98.1308	95.4279	97.4179	100.696	115.345	142.037		99.1607	104.205	109.387	113.034	120.681	132.161	170.381	220.012			-1.61242	90.2114	3.26741	4	94.2587	3.49025	4	99.2093	3.66653	4	99.3933	4.7741
	-1.5305	83.5474	86.9872	90.3274	90.1365	98.0395	109.054	125.774		88.906	93.1987	97.5683	97.7497	100.278	108.283	124.965	151.24		91.229	92.0751	97.7134	95.5621	96.8002	100.839	114.65	139.05		101.412	104.249	109.703	111.574	119.375	131.277	169.624	217.581			-1.5305	91.2737	3.74268	4	94.1275	3.63432	4	98.8279	4.014	4	98.7556	4.56265
	-1.4488	84.6058	87.16	90.4993	90.1283	98.8749	110.371	125.514		87.9031	92.7001	96.5716	97.9485	100.269	109.679	125.559	151.214		90.238	91.5297	97.4874	95.6124	96.4914	99.9643	115.275	139.355		100.4	104.818	108.231	111.833	119.011	130.087	167.684	219.182			-1.4488	90.7867	3.40623	4	94.052	3.78154	4	98.1972	3.68642	4	98.8805	4.61799
	-1.36713	84.5182	88.1292	91.0618	90.5206	97.0678	108.071	126.636		88.1654	93.3622	96.6231	98.0479	100.349	108.446	125.819	153.841		89.8244	91.5998	98.0612	95.4698	97.2978	100.205	115.921	140.426		100.213	105.475	108.321	112.289	118.863	131.944	167.353	216.336			-1.36713	90.6803	3.36532	4	94.6416	3.77127	4	98.5167	3.59964	4	99.0818	4.67119
	0	100	100	100	100	100	100	100		100	100	100	100	100	100	100	100		100	100	100	100	100	100	100	100		100	100	100	100	100	100	100	100			0	100	0	4	100	0	4	100	0	4	100	0
	0.0817	99.0438	98.0015	100.102	99.8284	97.9543	94.7786	93.0916		99.8071	99.5586	98.0495	99.6837	98.7375	96.7062	95.6338	94.1184		97.9945	99.8442	100.609	97.9614	97.9412	98.5091	95.4045	92.6135		100.56	100.613	99.4743	97.2624	96.9747	96.3203	91.1758	90.9576			0.0817	99.3513	0.54796	4	99.5044	0.548218	4	99.5585	0.553915	4	98.684	0.635886
	0.1633	98.0073	99.5041	99.4765	98.4473	95.9598	92.4159	86.5261		99.0665	99.6812	98.6939	98.3823	97.2958	93.9613	91.6243	86.2497		97.9633	98.2311	99.7044	97.7852	97.3235	95.9646	91.3846	86.2973		101.612	100.102	98.1075	97.6426	94.4454	91.4863	86.2077	83.4569			0.1633	99.1623	0.855462	4	99.3797	0.402867	4	98.9956	0.366667	4	98.0644	0.204847
	0.24505	100	98.3847	98.9999	97.4422	94.6897	88.9169	81.6019		99.0665	99.5994	97.8003	97.7045	96.0244	92.3625	88.7604	83.0621		98.1896	96.883	98.0438	96.3423	96.1225	93.9291	87.7618	81.7925		99.4671	99.27	98.6332	96.289	93.0071	88.456	80.9084	74.5627			0.24505	99.1808	0.381723	4	98.5343	0.607233	4	98.3693	0.273408	4	96.9445	0.367154
	0.326667	100.255	97.2051	98.8202	96.6086	93.2663	85.4901	76.6777		98.133	97.2125	96.8981	97.4785	94.0365	91.0527	85.0535	80.0213		96.3246	96.8363	98.7828	96.0403	94.5441	92.3757	83.9801	76.1821		101.465	98.0143	96.8759	93.8707	90.3951	85.3896	74.6156	69.4337			0.326667	99.0447	1.13858	4	97.317	0.248459	4	97.8443	0.552741	4	95.9995	0.768765
	0.408367	100.212	97.6108	97.8436	94.9661	91.1524	82.0543	72.2626		98.9199	97.8256	96.7005	96.8549	92.9352	89.5213	82.2652	72.8194		97.144	97.1246	98.1916	94.7987	94.2953	90.1616	82.0645	72.8064		100.093	97.4011	96.3503	93.4449	87.9815	81.4935	70.5701	65.3721			0.408367	99.0922	0.71185	4	97.4905	0.149615	4	97.2715	0.442405	4	95.0161	0.701184
	0.4901	99.5255	96.4613	97.4295	95.2684	89.6949	79.6555	68.5643		98.8428	98.5858	96.6403	96.8188	93.7142	88.5679	80.7522	69.2585		96.5431	97.1324	99.0697	95.1091	93.1114	89.3938	78.4516	68.184		100.6	97.7223	96.1099	91.4068	85.9977	79.347	67.613	60.8657			0.4901	98.8777	0.858091	4	97.4754	0.450921	4	97.3124	0.645466	4	94.6508	1.14801
	0.57185	100.131	96.4237	96.2028	94.6719	87.8196	76.6525	65.053		98.7425	98.9536	96.5544	96.0777	92.6486	88.2404	77.3263	68.2849		96.6758	96.1038	98.7393	95.3859	93.7462	89.7688	75.9206	63.9967		98.0949	97.3135	96.4103	90.6464	84.3115	77.6876	64.5612	58.7904			0.57185	98.4111	0.717671	4	97.1987	0.638515	4	96.9767	0.591955	4	94.1955	1.21734
	0.65355	98.4161	95.6048	96.4372	93.7648	86.882	75.2998	62.6117		98.4262	97.5231	97.0614	94.8125	91.4577	86.6031	75.2513	63.9771		97.5497	96.4155	98.1829	95.2349	91.044	86.0459	75.0174	60.9504		98.6944	97.3865	95.8847	89.1103	84.0469	75.4329	61.5093	56.7744			0.65355	98.2716	0.249094	4	96.7325	0.449528	4	96.8915	0.493012	4	93.2306	1.40778
	0.735183	97.1606	95.8678	95.7575	93.6749	85.9189	71.7738	59.1523		98.8736	97.1634	96.1248	95.7072	90.3474	85.8808	72.0199	61.4697		96.6133	95.8778	98.722	93.406	90.6494	85.5995	72	57.9393		101.359	97.8975	93.5266	89.4297	82.9724	72.8535	58.5995	53.1871			0.735183	98.5016	1.06718	4	96.7016	0.501442	4	96.0327	1.06446	4	93.0545	1.31291
	0.81685	96.6934	96.559	96.4372	93.9283	84.9727	71.0163	56.7629		99.568	97.1634	95.6951	93.7912	90.9115	84.4072	71.1985	59.1624		96.6758	96.735	97.8178	92.1477	90.2033	83.4747	69.3598	55.6222		99.4138	98.1311	93.7369	87.8783	79.8975	72.114	56.6123	51.7047			0.81685	98.0877	0.810724	4	97.1471	0.351695	4	95.9217	0.850769	4	91.9364	1.41187
	0.898567	97.8905	96.559	95.3668	92.7433	83.0123	68.9151	54.3009		98.0559	97.5313	95.2913	93.5924	88.9237	82.9433	69.1343	56.1616		96.4963	94.9973	96.9831	90.6628	89.0023	82.8319	66.6402	53.7168		100.773	95.8096	93.2112	86.7376	78.6907	70.1479	55.0035	50.0741			0.898567	98.3038	0.894187	4	96.2243	0.539888	4	95.2131	0.773007	4	90.934	1.52817
	0.9804	100.613	96.7168	95.6012	92.4982	82.3815	67.1025	52.0569		97.1686	96.6729	94.3977	93.8093	87.6074	82.1632	67.7726	54.2678		95.3258	94.0388	96.4267	90.344	88.6678	80.8589	64.9628	51.2938		97.8684	98.1749	93.6017	85.597	76.9714	66.36	52.1173	48.2063			0.9804	97.744	1.09643	4	96.4009	0.861219	4	95.0068	0.626824	4	90.5621	1.80261
	1.06202	99.0803	95.7551	95.4371	91.8608	81.3161	65.335	50.3844		97.8784	95.7492	93.7103	92.6796	86.8822	80.4007	64.9735	52.3206		95.1775	94.0544	95.2095	90.3356	87.3896	79.3501	63.5434	50.1059		99.9334	96.3498	91.7393	84.8213	76.1944	66.0714	50.3667	47.643			1.06202	98.0174	1.03622	4	95.4771	0.494728	4	94.024	0.852492	4	89.9243	1.76898
	1.14367	98.7883	95.8302	95.2965	91.7463	80.4125	63.7929	48.047		97.755	95.8718	94.5266	92.3633	86.6941	79.322	63.8388	50.9469		95.4584	93.6881	95.4095	90.4279	85.5966	77.993	61.2308	47.2477		99.3072	97.2697	91.5891	83.6198	75.2356	63.5281	48.9472	45.7753			1.14367	97.8272	0.852956	4	95.665	0.738973	4	94.2054	0.893899	4	89.5393	2.01404
	1.22532	99.438	95.4696	94.859	91.9425	79.3215	61.286	46.6861		97.5312	96.1743	93.3494	91.5409	85.6465	78.5033	62.1852	48.8664		95.5833	93.8362	95.3486	88.8674	84.876	76.761	58.928	45.8951		100.746	96.1016	91.4839	82.8897	73.1526	61.9769	47.6461	44.204			1.22532	98.3247	1.12721	4	95.3954	0.543293	4	93.7602	0.869896	4	88.8101	2.08812
	1.30702	97.8394	95.3193	95.8044	90.7167	77.9407	60.0234	45.0031		96.7906	95.6429	93.272	91.2246	85.2794	77.8099	59.9805	46.7858		95.1463	93.8985	95.1574	88.6997	83.8895	75.4129	57.5881	43.5074		101.039	95.6344	89.5915	81.7186	71.9788	60.4798	46.7944	43.3442			1.30702	97.7039	1.24224	4	95.1238	0.415301	4	93.4563	1.39576	4	88.0899	2.19262
	1.3886	100.007	95.4395	94.187	89.4337	76.7644	58.1207	43.798		97.6238	94.6702	92.9627	89.9593	84.5093	75.9125	58.6837	46.0256		95.9266	93.6959	93.9141	88.104	84.1983	74.8594	55.9007	42.5076		98.5745	95.9848	89.9519	80.1521	71.4829	58.8745	45.3513	42.4251			1.3886	98.0331	0.856115	4	94.9476	0.496776	4	92.754	0.970162	4	86.9123	2.28696
	1.47033	98.5182	95.2442	94.5308	89.9158	75.5285	56.6778	41.7411		96.4743	95.3405	91.88	89.8147	83.2647	75.6525	56.8789	44.1851		96.1061	92.6362	95.6964	87.7013	83.8809	74.2791	54.4814	41.2726		100.466	94.8898	88.8856	80.8061	69.714	57.8283	44.2158	41.3578			1.47033	97.8912	1.00906	4	94.5276	0.637894	4	92.7482	1.51502	4	87.0595	2.14606
	1.55213	96.9781	95.1165	92.4603	88.6819	74.625	55.3522	40.5776		97.5158	94.4658	92.5159	90.4202	82.3066	73.9863	56.2736	43.3716		94.9512	93.3375	93.3838	86.7785	82.1395	72.8417	53.5087	39.4613		98.308	95.1818	89.3211	79.8023	68.4411	56.7641	42.749	40.676			1.55213	96.9383	0.716455	4	94.5254	0.427674	4	91.9203	0.891807	4	86.4207	2.3281
	1.63377	98	95.2968	92.5932	88.8698	73.1418	54.6217	39.84		97.5158	94.7846	92.5073	89.7695	82.1902	73.447	54.9551	42.5447		95.833	93.244	93.4707	86.3255	81.6076	71.9579	51.9206	38.5674		100.999	95.0066	87.7441	78.616	67.9616	55.6457	42.8436	40.0534			1.63377	98.087	1.07607	4	94.583	0.458484	4	91.5788	1.29665	4	85.8952	2.53363
	1.71557	100.022	95.6649	92.9995	88.4285	72.2128	53.3502	39.1336		96.9989	94.9072	92.662	88.6308	80.865	73.1869	54.2203	41.0509		94.9278	93.2596	94.4531	86.4681	80.7412	70.3776	50.5906	37.6029		98.6544	93.1085	87.9694	77.7795	66.3581	54.3651	41.0693	38.7192			1.71557	97.6508	1.09806	4	94.235	0.626966	4	92.021	1.40533	4	85.3267	2.56259
	1.79735	100.08	95.154	93.3667	87.9627	71.7866	51.8352	37.9597		96.8292	94.711	91.6824	88.4953	81.3216	71.0681	51.8751	39.3572		96.1998	92.6907	93.8185	86.2584	79.9348	70.1366	49.6576	36.4502		96.1231	93.8531	87.0682	76.6388	65.2174	53.6255	40.5015	39.0454			1.79735	97.3081	0.937509	4	94.1022	0.542472	4	91.4839	1.54199	4	84.8388	2.77465
	1.87898	97.7226	94.4853	93.0307	86.9167	69.9881	50.8792	36.8066		97.1918	93.8282	93.2291	88.0253	80.2561	70.7984	51.1077	38.7037		95.6457	92.792	92.6187	85.9312	80.1578	68.5921	48.5757	35.5916		98.7477	94.1305	87.5188	75.8175	64.5396	52.6154	39.1057	37.9188			1.87898	97.327	0.646773	4	93.809	0.364628	4	91.5993	1.36611	4	84.1727	2.81771
	1.96072	99.7664	94.6506	91.5931	87.121	69.954	49.6258	35.3937		96.8755	94.523	91.5363	88.5495	79.6562	70.3939	50.6214	38.2902		95.6067	92.792	93.036	85.6963	80.1321	68.5921	47.0868	34.5919		98.4146	94.5832	86.0168	75.5741	62.9856	51.1544	38.8692	36.4957			1.96072	97.6658	0.905436	4	94.1372	0.449152	4	90.5456	1.54894	4	84.2352	2.94519
	2.04227	99.0584	94.305	92.1244	87.0475	68.7777	49.0576	34.6458		96.9449	94.7029	91.5449	87.709	79.3875	69.3345	49.8541	37.3566		96.4417	92.9868	92.61	85.1426	78.9483	67.9761	46.4218	33.792		97.6819	93.6049	85.5512	74.9962	62.6219	50.5592	38.467	36.9701			2.04227	97.5317	0.569049	4	93.8999	0.379646	4	90.4576	1.64989	4	83.7238	2.95963
	2.12392	99.0365	93.4861	90.7337	86.0015	68.0447	47.9033	34.0121		96.9835	94.1633	90.763	87.5915	78.3936	68.6892	48.7409	36.6631		96.0905	92.9635	92.9925	85.2768	77.7816	66.5833	45.8263	33.2392		97.9083	93.6633	84.3797	74.7376	61.7953	49.2605	37.9702	36.3475			2.12392	97.5047	0.631196	4	93.569	0.247603	4	89.7172	1.85615	4	83.4019	2.92824
	2.20567	98.0876	93.734	91.1712	85.2415	66.715	46.244	33.1602		97.0992	94.7764	89.9725	87.6819	78.0086	67.7165	47.3036	35.5028		95.5989	92.8777	92.923	84.203	78.0475	65.6549	44.7841	32.6159		99.0807	93.7363	84.9204	73.3536	60.7704	48.7193	37.1422	36.0806			2.20567	97.4666	0.742424	4	93.7811	0.388474	4	89.7468	1.71906	4	82.62	3.17368
	2.28723	98.1533	93.0579	91.0618	84.7185	66.1609	45.4414	32.5369		97.0066	93.5257	91.4934	86.8775	77.7758	67.0326	46.8064	35.1427		94.0694	91.6855	92.8534	84.0604	77.1639	65.0924	44.4764	32.0395		96.6027	93.0209	84.7552	73.2167	60.2414	47.0779	36.74	35.5173			2.28723	96.458	0.861253	4	92.8225	0.396024	4	90.0409	1.8028	4	82.2183	3.06024
	2.36888	99.4088	93.7491	90.1477	85.029	65.5387	44.3683	31.737		97.1301	93.7056	90.5396	85.9015	75.976	66.214	45.9527	34.7159		95.0059	93.0959	92.4187	83.255	76.6321	64.8871	42.6402	31.2632		96.0032	93.3421	83.5236	71.9696	58.8031	46.8074	36.4561	35.2802			2.36888	96.887	0.945964	4	93.4732	0.155353	4	89.1574	1.94223	4	81.5388	3.2369
	2.4505	96.9562	93.6739	90.218	84.7185	64.4647	43.7911	31.2487		97.2072	94.1797	90.2732	85.8292	76.7908	65.8384	45.596	34.2358		96.6055	91.8881	92.0449	82.3826	75.371	64.1193	42.6898	30.6516		98.348	92.6413	84.0793	71.5894	58.3072	46.5548	35.155	34.8058			2.4505	97.2792	0.37701	4	93.0957	0.51431	4	89.1538	1.7439	4	81.1299	3.26027
	2.53215	97.2628	93.3358	89.5382	83.0596	63.9874	43.4394	30.6462		97.1995	93.9835	90.2131	85.7388	76.1193	65.0872	44.4504	33.5823		96.1686	92.2777	91.558	82.4664	75.2252	62.3069	41.4888	30.5105		96.1098	92.9917	84.1093	70.0989	58.0261	45.4004	34.5635	33.9164			2.53215	96.6852	0.315718	4	93.1472	0.355334	4	88.8547	1.63653	4	80.3409	3.48743
	2.6138	96.5036	93.1555	90.6477	83.8032	63.0753	41.8162	29.9605		97.6547	93.4276	90.5224	85.9196	75.9223	64.5478	43.802	33.2355		95.5755	92.4647	90.8103	83.2886	75.6541	62.4498	40.6055	30.2164		97.1889	93.9553	84.0943	70.7681	57.5963	45.2381	35.084	33.7978			2.6138	96.7307	0.451824	4	93.2508	0.310185	4	89.0187	1.64251	4	80.9449	3.4397
	2.6957	97.1387	92.9602	88.7647	83.4191	62.1292	41.2842	29.5969		96.9218	93.1906	90.0584	85.0881	75.4835	64.2589	42.8942	32.5287		95.3414	91.7011	91.6188	82.1309	74.4874	61.7445	39.6328	29.4284		96.3363	93.1085	82.1568	70.038	56.0423	44.715	34.7528	33.3235			2.6957	96.4345	0.401853	4	92.7401	0.349596	4	88.1497	2.08109	4	80.169	3.43083
	2.77733	100.54	92.1938	89.4914	82.7164	61.8224	40.5266	28.9113		96.7443	93.2151	90.4623	85.07	74.0419	62.5445	42.1593	32.1152		95.0059	91.4361	91.5145	81.6443	73.7411	61.2624	39.5831	29.0637		97.2955	92.7581	82.4272	69.2319	56.3234	44.1017	33.5936	33.0863			2.77733	97.3964	1.15589	4	92.4008	0.383414	4	88.4738	2.05745	4	79.6657	3.55072
	2.85885	99.4818	93.5162	88.4678	82.6019	60.5353	39.7421	28.9321		97.4618	93.5094	89.8608	83.0818	73.9613	62.7564	41.8351	31.6218		95.8564	91.2024	90.9494	82.4664	73.1149	60.3964	38.8883	28.6638		97.482	93.1961	81.3608	69.2167	55.067	42.803	33.7592	32.7898			2.85885	97.5705	0.742215	4	92.856	0.55624	4	87.6597	2.16018	4	79.3417	3.37758
	2.94042	97	92.0661	88.3194	82.3895	60.3819	39.5888	28.2672		97.8476	93.869	89.3281	84.5549	73.3972	61.8896	40.9705	31.0883		95.5833	91.6232	90.2713	82.1309	73.5009	59.3429	38.3325	27.7582		96.4029	92.6413	82.6524	68.3194	54.5214	42.5685	33.2387	32.6119			2.94042	96.7084	0.478007	4	92.5499	0.486601	4	87.6428	1.71051	4	79.3487	3.71637
	3.02207	97.562	92.0361	89.2726	81.3925	59.8704	38.3984	27.3218		95.9651	94.3595	89.8436	83.9765	73.2271	60.9458	40.2356	30.3681		95.0605	91.1634	90.2886	82.0973	72.3342	59.3697	37.4194	27.6994		96.1897	91.809	81.0303	67.1027	53.4799	42.0996	32.5053	32.6416			3.02207	96.1943	0.517107	4	92.342	0.697443	4	87.6088	2.20266	4	78.6422	3.88499
	3.10378	97.5255	92.562	88.0772	81.3843	58.8987	38.3533	27.7893		96.7366	92.463	89.2078	83.8409	72.7794	61.5333	40.1708	30.3681		95.5911	91.6543	90.28	80.9564	71.5879	58.3876	37.3499	27.1583		96.9624	92.4223	81.1655	67.3916	53.4799	41.342	32.6473	31.7225			3.10378	96.7039	0.406339	4	92.2754	0.209089	4	87.1826	2.05549	4	78.3933	3.72189
	3.1853	97.2044	91.6604	87.2959	81.1882	57.7395	37.2982	26.7712		96.6672	93.3704	89.5515	83.3077	72.5197	61.0999	39.2737	29.848		95.318	90.9842	89.2367	80.1091	70.996	58.0037	36.7246	26.9701		95.83	92.174	80.5497	66.7529	53.3807	42.0815	32.6236	31.1592			3.1853	96.2549	0.42129	4	92.0473	0.503863	4	86.6584	2.09642	4	77.8395	3.75478
	3.26695	96.2409	92.1337	87.7803	80.7633	57.4753	36.9646	26.6258		95.8031	93.4685	89.5429	83.0908	71.5527	59.4433	38.9171	29.3145		95.1229	91.5686	90.2278	80.6124	70.7815	57.3967	36.1191	26.5232		96.203	92.2032	79.4833	66.8593	51.6945	40.5483	32.6473	31.1296			3.26695	95.8425	0.259498	4	92.3435	0.401013	4	86.7586	2.47926	4	77.8315	3.7011
	3.3486	99.6131	91.3373	88.0538	81.0738	57.0491	36.3964	26.1375		96.2197	93.166	88.2368	83.7054	71.4452	59.3566	38.3551	29.1945		95.5287	90.4075	90.2104	80.1594	70.3612	56.8342	35.2754	26.3938		96.3762	91.2542	79.6786	65.9011	52.1904	39.899	31.4644	31.0999			3.3486	96.9344	0.911684	4	91.5413	0.580889	4	86.5449	2.34025	4	77.7099	4.00737
	3.43032	98.146	91.3298	86.7255	79.6274	56.282	35.4225	25.6804		96.6672	93.444	88.1767	81.9792	70.7736	57.5364	38.4848	29.3678		95.5599	90.8751	89.0889	79.3372	69.6406	55.7897	35.0372	26.0056		95.1106	92.4223	79.6335	65.4601	51.7937	39.8088	31.2988	31.0703			3.43032	96.3709	0.676071	4	92.0178	0.575659	4	85.9061	2.14674	4	76.601	3.76044
	3.51213	98.5985	90.9767	86.6943	79.5702	55.8302	35.0798	25.5038		96.5206	93.5257	88.9672	82.3226	70.4513	58.5091	37.1339	28.6476		95.1385	91.2569	88.4368	79.7399	69.5462	55.9771	34.3722	25.7469		95.4436	91.4002	79.0327	64.9886	50.9506	39.3759	30.9203	30.8924			3.51213	96.4253	0.782705	4	91.7899	0.585253	4	85.7827	2.30178	4	76.6553	3.93957
	3.59382	98.6642	91.8032	86.9912	79.4149	55.0119	34.9806	25.2234		97.5698	92.9698	88.8469	81.7985	70.1827	57.7386	37.1447	28.1542		95.7706	91.6465	88.6194	79.3876	69.1773	54.9058	34.2928	25.5822		95.2172	90.933	78.4169	64.6084	50.2232	38.9971	30.9676	30.5366			3.59382	96.8054	0.797545	4	91.8381	0.422097	4	85.7186	2.46871	4	76.3023	3.93873
	3.67545	98.5182	91.5477	87.7647	79.4557	55.5574	34.187	25.026		96.6749	92.9535	87.5924	81.7804	69.5648	57.0741	36.118	27.7541		95.2556	90.7426	88.289	79.0604	68.3195	54.3523	33.737	25.3705		95.9632	91.371	78.0415	63.8175	50.0909	38.3838	30.7547	30.3884			3.67545	96.603	0.701086	4	91.6537	0.466429	4	85.4219	2.4646	4	76.0285	4.11432
	3.75708	97.6569	91.8633	87.5146	79.1616	54.1681	34.4486	24.6624		96.4975	92.1115	87.515	81.916	69.1171	56.0628	35.729	27.5407		93.8666	90.8673	88.7063	78.599	68.0707	54.0845	33.4988	25.1588		95.6835	91.0498	78.7924	63.2091	49.2313	38.4921	31.0149	29.7658			3.75708	95.9261	0.797015	4	91.473	0.303585	4	85.6321	2.29712	4	75.7214	4.23325
	3.83885	96.3212	92.2615	85.8036	78.6631	53.4947	33.4927	24.1533		96.7906	93.5911	88.1681	80.0904	68.7679	55.5716	35.6533	27.6074		94.7639	90.5946	87.6543	77.5419	67.453	52.7274	32.7742	24.6295		96.5228	90.9038	76.7798	62.981	48.5535	37.9329	30.0923	29.4397			3.83885	96.0996	0.455489	4	91.8377	0.687485	4	84.6014	2.65619	4	74.8191	3.98034
	3.92077	96.7664	91.2096	85.7801	77.4536	52.864	33.2131	24.0183		96.1966	92.7491	86.8534	80.4248	68.2128	55.196	34.551	27.4607		94.1085	89.566	88.1586	77.5755	67.5474	52.7631	32.5062	24.8177		96.5228	90.9914	76.4494	62.403	48.4378	37.3016	30.1869	29.5286			3.92077	95.8986	0.608007	4	91.129	0.651493	4	84.3104	2.66507	4	74.4642	4.07857
	4.00265	99.2117	91.2472	85.8426	77.8867	53.1452	33.0688	23.8625		95.9111	93.0271	86.7245	80.2802	67.2457	54.3966	34.6374	26.6204		94.6469	90.7894	88.489	77.8859	67.1957	52.2275	32.3275	23.9708		95.7767	90.4804	77.1403	61.9163	48.3551	36.9408	29.6664	28.6688			4.00265	96.3866	0.983433	4	91.386	0.569247	4	84.5491	2.53013	4	74.4923	4.22978
	4.08445	95.9927	91.157	85.4364	77.3392	51.9945	32.5458	23.5092		96.4357	92.7082	86.3465	79.991	67.2636	54.1269	34.4213	26.6738		95.3336	90.2283	87.3326	77.3238	65.8832	52.3525	31.6725	23.9003		94.7375	91.517	76.5695	61.9772	47.8261	36.2554	30.1396	28.7874			4.08445	95.6249	0.372492	4	91.4026	0.512921	4	83.9212	2.48097	4	74.1578	4.10831
	4.16607	97.0219	90.7513	86.0927	78.0665	51.807	32.0137	23.1249		96.374	92.3486	86.5441	80.1988	67.4516	53.3564	34.0538	26.247		95.1307	89.3244	87.6891	77.1057	66.1148	51.7097	31.0769	23.7356		97.7218	91.1958	76.179	61.2319	47.5285	36.3817	29.9976	28.402			4.16607	96.5621	0.550804	4	90.905	0.625192	4	84.1262	2.67028	4	74.1507	4.3545
	4.24773	98.5547	90.849	84.991	77.4618	51.8241	31.4907	23.1872		96.5592	91.2859	86.7933	79.042	66.5115	53.6454	33.3838	25.9803		94.4674	89.6906	86.698	76.1661	65.377	50.7455	30.6005	23.1828		94.964	90.9768	77.0952	60.4106	46.2886	36.544	28.933	27.7201			4.24773	96.1363	0.921369	4	90.7006	0.34891	4	83.8944	2.30389	4	73.2701	4.32664
	4.32938	98.4964	90.5259	85.1785	76.8162	50.3069	31.2472	22.9794		95.5408	91.4085	86.3207	79.8554	66.0279	53.2409	32.9082	26.1803		94.6781	89.566	87.4022	76.6946	64.7765	50.3973	30.1439	23.2651		95.417	89.9255	76.6747	60.5019	45.9745	35.3535	28.7438	28.3131			4.32938	96.0331	0.842888	4	90.3565	0.402706	4	83.894	2.44889	4	73.467	4.38311
	4.411	97.7883	90.8415	85.0613	76.4566	50.2642	30.8774	22.6989		96.1117	91.4821	86.3808	78.545	65.7862	52.3644	33.0163	25.9803		94.1553	88.8802	86.698	76.5436	64.7336	50.2991	30.2233	23.2416		94.4045	89.8379	75.9688	59.8023	45.2802	35.3716	29.075	27.2161			4.411	95.6149	0.844894	4	90.2604	0.57107	4	83.5272	2.54428	4	72.8369	4.37155
	4.4927	99.0803	90.0075	85.5145	76.6201	49.8636	30.652	22.5431		95.7414	91.4657	85.7965	79.2228	65.1057	52.297	32.9082	25.3668		94.007	89.7218	85.7329	75.646	64.1589	49.2724	29.8164	23.2298		95.8034	89.5751	74.9775	59.5589	45.2471	34.9747	29.3825	27.7794			4.4927	96.158	1.05932	4	90.1925	0.433781	4	83.0054	2.67664	4	72.7619	4.46528
	4.57445	95.7226	90.4132	84.4832	75.3044	49.2243	30.0568	22.1691		96.9912	91.6537	86.5613	78.3461	64.7475	51.5265	31.9896	25.5268		94.9356	89.7686	85.3591	74.6477	63.6871	49.1206	30.2134	23.171		96.3629	88.3341	75.0225	59.3156	44.8173	34.4517	27.8211	27.3051			4.57445	96.0031	0.440076	4	90.0424	0.690849	4	82.8565	2.64583	4	71.9034	4.27258
	4.65628	96.0073	90.2855	84.1941	75.4515	49.2584	29.9035	21.9406		95.7568	92.1524	86.6042	77.7316	64.8729	51.2376	31.968	25.2734		94.881	89.4101	85.8372	75.1007	63.5584	48.8706	28.9628	22.4771		96.3096	89.2831	75.0676	58.5095	44.5528	34.3975	28.8621	27.4533			4.65628	95.7387	0.307418	4	90.2828	0.661833	4	82.9258	2.6672	4	71.6983	4.43478
	4.73812	97.8686	90.0451	84.0222	75.476	48.5424	29.4526	21.6289		96.104	91.1551	86.0027	77.6683	64.846	50.4478	31.5789	25.0467		94.1475	89.7686	85.3417	74.5973	62.8893	48.2725	28.9628	22.0772		96.2297	89.5167	75.2328	58.5703	44.0734	34.0368	27.9631	27.2161			4.73812	96.0874	0.761387	4	90.1214	0.361066	4	82.6499	2.50639	4	71.578	4.3837
	4.81983	95.4307	89.707	84.0769	75.8111	47.9458	29.2091	21.6913		95.0779	91.6455	84.4475	77.0447	63.9774	50.4382	31.3736	25.1134		93.8041	89.9478	85.1852	74.7735	63.241	48.1118	29.0521	22.0066		97.1889	90.86	73.836	57.5665	43.7097	34.4517	27.8448	27.0086			4.81983	95.3754	0.698168	4	90.5401	0.444339	4	81.8864	2.69333	4	71.299	4.60095
	4.9014	95.1168	90.0751	83.2956	74.5444	48.1845	28.9206	21.5354		95.4097	91.1224	85.7879	76.4483	63.5655	49.7833	31.017	25.0467		93.9992	89.3945	85.2287	74.656	62.6576	47.4422	28.4764	22.2301		93.4985	89.0933	73.2352	55.2091	43.8089	33.8745	28.105	26.8604			4.9014	94.5061	0.452906	4	89.9213	0.449935	4	81.8868	2.93288	4	70.2145	5.02076
	4.98305	95.781	90.1728	83.9753	74.6997	47.5793	28.4516	21.0991		95.2476	91.4821	84.7998	76.9272	62.894	49.2536	30.7576	24.9266		94.0148	89.4491	85.2982	73.6074	62.4089	46.5494	28.3275	21.7243		95.9899	89.8379	73.4755	55.3612	43.1476	33.4957	27.7502	26.8604			4.98305	95.2583	0.442979	4	90.2355	0.441056	4	81.8872	2.81713	4	70.1489	4.97738
	5.06472	99.0438	90.2479	83.9362	75.0347	46.5905	28.5779	21.0056		97.1764	92.3077	84.6881	77.0086	63.2521	48.8009	30.6063	24.4865		94.9512	88.9426	85.0635	73.8171	62.1343	46.5494	28.0993	21.7831		94.0448	89.3999	72.9498	54.8897	42.4202	33.153	27.3717	27.1865			5.06472	96.304	1.12552	4	90.2245	0.74518	4	81.6594	2.91263	4	70.1875	5.14149
	5.14638	97.5693	88.7829	82.9284	74.193	46.1047	27.7031	20.9952		95.996	91.2695	84.1811	76.4844	63.0731	48.5987	30.2929	24.1931		93.5076	88.3114	85.5677	73.9094	61.2164	46.4601	27.8213	21.689		93.7517	88.9619	74.1364	54.0532	42.6186	32.8463	27.2534	26.0895			5.14638	95.2062	0.966483	4	89.3314	0.66044	4	81.7034	2.57928	4	69.66	5.2341
	5.22808	98.7956	90.4808	83.4987	74.2993	45.6785	28.5238	20.6732		95.0316	91.2777	84.4389	76.8098	61.8911	48.3675	29.7525	23.6997		93.1018	88.5607	84.8548	72.6762	60.9591	45.5138	27.196	21.2185		97.1623	87.823	73.1451	53.8403	42.5194	33.0267	27.1824	26.4157			5.22808	96.0228	1.24169	4	89.5356	0.806824	4	81.4844	2.7942	4	69.4064	5.25789
	5.30988	98.3139	90.834	82.9205	73.2532	46.1302	27.5228	20.5693		95.9497	90.5828	84.6795	76.864	61.2285	47.8282	29.839	23.5263		94.2177	89.1919	84.2462	72.7936	60.4444	44.9067	27.2357	21.5243		96.656	87.9544	72.6945	54.2053	42.0069	32.3413	27.5373	25.9709			5.30988	96.2843	0.848532	4	89.6408	0.668104	4	81.1352	2.83833	4	69.279	5.10633
	5.39162	95.3869	89.7821	82.8268	72.6077	45.15	27.5588	20.4862		95.2554	90.8608	83.8117	75.4451	61.0047	47.7126	29.7309	22.7394		93.8197	88.8179	84.4897	71.6191	60.0841	44.8978	27.1563	21.1127		94.9907	87.677	72.1989	53.9011	41.7259	31.71	27.0641	25.5262			5.39162	94.8632	0.357429	4	89.2845	0.679093	4	80.8317	2.8978	4	68.3933	4.89828
	5.47318	95.9124	90.1578	82.8424	72.9836	45.15	27.0629	20.2472		95.3865	90.6564	84.3272	74.939	61.3001	46.8362	29.3851	23.3262		93.3125	88.4283	84.2114	71.6695	59.8868	44.4067	26.6104	21.0303		94.5111	86.1732	72.1989	53.2624	41.8582	31.5837	26.5673	25.7931			5.47318	94.7806	0.568333	4	88.8539	1.01311	4	80.895	2.91825	4	68.2136	5.0288
	5.5549	99.6058	89.6018	82.2955	73.0735	44.6045	26.8825	20.32		95.2708	90.0842	83.0211	74.7944	60.7808	46.3065	29.4499	23.0461		94.1397	88.5452	82.6726	72.198	59.4149	44.4692	26.5806	20.6775		95.8833	86.728	71.0874	53.597	41.0646	31.8723	26.7093	25.7338			5.5549	96.2249	1.18342	4	88.7398	0.743624	4	79.7692	2.89771	4	68.4157	4.96893
	5.6368	96.3285	89.0609	82.2955	73.4984	44.613	26.63	20.1226		95.5408	91.0406	83.2188	74.5956	60.7002	46.5954	28.7907	22.7661		93.9134	88.101	83.2029	72.3993	58.5485	43.9961	26.273	20.5011		94.3645	85.8373	71.6582	52.2281	40.9489	31.2771	26.5673	25.2594			5.6368	95.0368	0.550491	4	88.51	1.08081	4	80.0938	2.82016	4	68.1804	5.33627
	5.71842	96.6496	88.7303	82.7096	71.6924	44.1101	26.6751	19.9668		95.2862	90.7954	83.1414	75.0023	60.0107	46.4317	28.4989	22.8061		93.1955	89.753	83.229	70.6628	58.9517	43.9961	26.2928	20.6892		94.2313	86.1148	70.8922	52.5323	40.3703	31.3312	26.0232	24.6961			5.71842	94.8407	0.738745	4	88.8484	1.00398	4	79.993	3.03575	4	67.4724	5.06534
	5.80012	98.3358	89.6619	81.5454	72.4361	44.0846	26.1971	20.0499		94.9391	90.3785	83.0727	73.8455	60.3331	45.6708	28.4016	22.366		92.8053	88.3114	83.9419	71.2584	58.5399	43.7639	25.8462	20.654		96.9358	87.0346	70.9823	52.6084	39.9405	30.8622	26.4727	25.0222			5.80012	95.754	1.20489	4	88.8466	0.740562	4	79.8856	3.00881	4	67.5371	5.00425
	5.88197	96.5109	89.3013	80.9594	72.2072	43.2151	26.2693	19.4577		95.5331	90.8526	82.1017	74.2431	59.9928	45.4782	28.2395	22.5927		93.0784	87.688	82.603	70.3188	58.1367	42.9872	25.8164	20.3129		94.631	86.1148	70.3965	52.5475	39.3123	31.2951	26.1415	25.1112			5.88197	94.9384	0.729191	4	88.4892	1.02164	4	79.0152	2.8934	4	67.3292	4.99193
	5.96373	95.1679	89.707	81.2329	71.2756	43.0873	26.0258	19.7278		95.1936	90.4275	82.7977	73.8635	59.4019	45.7382	27.6127	22.486		93.2813	88.3815	83.5072	70.1762	57.9823	42.9158	25.8462	20.1364		94.6176	85.8519	70.1712	51.5133	39.6429	30.5736	26.3307	24.8444			5.96373	94.5651	0.448078	4	88.592	1.00683	4	79.4273	3.12171	4	66.7072	5.12325
	6.04553	94.4818	89.4065	81.4204	71.0387	42.6611	25.62	19.5097		96.1426	89.8553	82.4626	73.5743	58.6855	44.9774	27.8504	22.1526		94.0382	88.5062	82.8986	70.8557	57.0816	42.148	25.4293	20.2658		95.2305	86.582	70.0511	52.2129	39.6594	30.4473	25.692	24.5775			6.04553	94.9733	0.460913	4	88.5875	0.724957	4	79.2082	3.06808	4	66.9204	4.94158
	6.12712	96.8394	89.5793	81.7017	71.4473	42.7634	25.3945	19.2084		96.158	89.234	82.4798	73.6014	58.399	44.5729	27.7532	22.5927		93.5076	87.049	82.5943	69.9664	56.8671	41.8623	25.1315	20.2776		93.8849	86.9616	69.5855	51.6958	39.1966	30.2128	25.7866	24.5775			6.12712	95.0975	0.824476	4	88.206	0.697009	4	79.0903	3.17449	4	66.6777	5.04942
	6.20887	98.3212	89.5793	81.186	70.9733	42.3031	25.1871	19.4369		95.4174	90.0352	82.0244	73.8364	57.7095	44.255	27.2668	21.6591		92.9458	87.4075	82.9073	69.9413	56.7041	41.2731	24.7047	19.5601		94.2446	85.8958	69.9609	51.6502	39.5437	30.5195	25.4081	24.0439			6.20887	95.2322	1.1467	4	88.2294	0.966279	4	79.0197	3.03995	4	66.6003	5.05101
	6.29048	97.1679	88.7904	80.6704	70.9733	42.1497	25.0609	19.3434		94.8773	90.403	82.7891	72.7971	58.1662	43.8794	27.0615	22.0325		92.9146	87.2672	82.1075	69.7399	56.5068	41.5677	24.8834	19.7601		95.2305	86.1148	69.1349	50.692	38.2873	30.1046	25.1952	24.4589			6.29048	95.0476	0.871203	4	88.1438	0.931286	4	78.6755	3.2107	4	66.0506	5.15788
	6.37215	97.8467	89.1435	81.522	71.0223	42.1071	25.0428	18.8448		95.0239	89.9534	82.3165	72.6796	56.7962	43.7638	27.256	21.6991		93.7573	87.5399	82.6987	69.4715	55.812	41.5052	24.8536	19.6542		94.1513	86.363	68.7143	50.8745	38.1055	29.9242	25.2188	24.2514			6.37215	95.1948	0.922723	4	88.25	0.804414	4	78.8129	3.37509	4	66.012	5.08815
	6.454	94.9635	89.5567	80.1938	70.7772	41.2803	24.6911	18.8967		96.0423	89.8717	81.2854	72.2097	56.6977	43.5231	26.9966	22.1526		92.4385	87.6412	81.3163	69.203	55.7605	40.8624	24.6055	19.5836		94.0581	85.6767	69.3001	50.1597	38.0063	29.7619	25.1715	24.1921			6.454	94.3756	0.762475	4	88.1866	0.970973	4	78.0239	2.91963	4	65.5874	5.17908
	6.53577	96.5474	88.7904	80.475	69.9436	41.0501	24.3214	18.6474		94.1136	90.0924	81.6291	72.2729	57.1812	43.1571	26.4347	21.1656		92.8443	87.6646	80.8642	68.9094	55.649	41.0856	23.9901	19.419		93.8582	86.2462	68.5641	49.7338	37.5434	29.4012	25.2188	23.9253			6.53577	94.3409	0.784923	4	88.1984	0.818214	4	77.8831	3.11557	4	65.2149	5.20808
	6.61753	97.0657	88.7979	80.4438	70.4339	40.6325	24.61	19.0837		94.8465	90.2313	82.4798	71.8753	56.2321	42.4925	26.5319	21.3924		92.6024	87.7192	81.3511	68.3725	54.7997	40.2018	24.3275	19.0661		96.7093	85.5453	68.5641	49.5665	37.7087	29.5274	25.0296	23.5992			6.61753	95.306	1.02414	4	88.0734	0.987344	4	78.2097	3.24204	4	65.0621	5.21494
	6.69913	96.6788	88.9482	80.6469	70.6219	40.4535	24.0058	18.5747		95.2862	89.3648	81.7924	71.5228	56.5903	43.0897	26.5752	21.6058		92.2513	87.9296	81.1163	68.0621	55.057	40.0054	23.7519	19.3602		94.4045	85.7935	68.1736	49.6274	36.8325	29.3831	24.8167	23.6288			6.69913	94.6552	0.928036	4	88.009	0.797644	4	77.9323	3.26138	4	64.9585	5.16268
	6.78085	96.2117	88.4598	80.1156	70.1724	40.3171	24.0058	18.8448		94.7385	89.5528	81.2081	71.0709	55.7844	42.1169	26.024	20.9523		93.1643	86.2386	81.4641	68.2886	54.7311	39.2822	23.9206	18.9485		94.7642	85.5015	68.429	49.0342	37.2458	29.2569	24.793	23.5399			6.78085	94.7197	0.622343	4	87.4382	0.944508	4	77.8042	3.13873	4	64.6415	5.23464
	6.86247	98.0073	89.0158	80.186	69.4043	39.7801	23.9607	18.502		94.237	90.1905	81.2511	71.08	55.4889	42.1651	25.6241	21.3924		92.4776	87.8672	81.6814	67.9446	54.1992	39.5233	23.7618	19.2661		93.352	86.1732	67.4377	48.6236	36.6342	29.0224	24.4855	23.5992			6.86247	94.5185	1.21714	4	88.3117	0.856175	4	77.639	3.41495	4	64.2631	5.25238
	6.94417	96.781	87.9189	79.1781	68.9385	39.746	23.7623	18.315		95.8803	91.2123	80.452	71.2336	55.5605	41.7798	25.9483	21.179		91.7753	88.4828	80.3252	68.0705	53.9161	39.3626	23.6228	19.1131		93.6984	85.7205	67.4377	48.8365	36.1878	28.3189	24.4855	23.4509			6.94417	94.5337	1.12437	4	88.3336	1.1295	4	76.8482	3.1499	4	64.2698	5.18751
	7.02605	97.7883	87.9639	80.5297	68.4563	39.0897	23.6721	18.2319		94.6845	89.6019	80.0395	71.2878	55.3277	41.6161	26.0024	21.0189		93.7807	86.9867	81.4554	67.0386	53.3499	39.1572	23.4938	18.9838		93.7783	85.5307	66.3412	48.365	36.6837	28.0303	24.8876	23.0655			7.02605	95.008	0.951016	4	87.5208	0.855035	4	77.0915	3.59541	4	63.7869	5.21596
	7.10762	98.4818	88.5124	78.9202	68.489	38.7913	23.7352	18.315		95.6565	88.9316	80.7785	70.8812	54.7099	40.6819	25.4188	21.419		91.9547	86.5737	80.073	67.3658	53.9676	38.4073	23.3052	18.8661		95.9499	85.4577	67.0021	48.1673	36.7664	28.4271	24.7457	22.858			7.10762	95.5107	1.34431	4	87.3688	0.818256	4	76.6935	3.25307	4	63.7258	5.23771
	7.18937	95.7226	87.6258	79.2718	68.1213	38.5868	23.4376	18.3358		94.7153	88.1713	80.22	70.7817	54.6114	40.6241	25.4188	20.6055		91.4943	87.2204	79.8035	66.8792	53.5301	38.3805	23.4045	18.3721		95.3504	85.3847	66.5365	47.6806	36.006	28.5714	24.2489	22.8283			7.18937	94.3207	0.964784	4	87.1006	0.604218	4	76.4579	3.31284	4	63.3657	5.29134
	7.27113	96.1022	88.272	79.3421	68.6606	38.7999	23.2843	18.2423		94.6845	88.9725	80.2457	70.2756	54.8263	40.5085	24.9325	20.0587		92.7273	87.5321	80.0209	66.9799	53.5301	38.193	22.6898	18.4074		91.8332	85.2533	67.4677	47.4981	35.5265	28.1566	24.036	22.4133			7.27113	93.8368	0.961595	4	87.5075	0.806869	4	76.7691	3.10641	4	63.3536	5.3278
	7.35292	95.2628	88.1142	79.7328	68.4318	38.9533	22.9687	17.7748		95.6874	89.6101	80.1255	70.0497	54.2085	40.0559	25.181	20.3521		92.0328	87.1114	79.3601	66.7366	52.8953	37.8627	22.6501	18.4545		93.6184	85.2533	66.4764	47.0114	35.4108	28.355	23.894	22.5912			7.35292	94.1503	0.835017	4	87.5222	0.91407	4	76.4237	3.31944	4	63.0574	5.39125
	7.4345	98.5985	89.0909	79.475	67.8353	38.1691	23.2302	17.8891		95.0471	88.997	80.3832	69.9232	54.1995	40.393	25.4836	20.7522		92.5166	86.1373	80.6208	66.6107	53.2641	38.068	22.9181	18.5839		95.2305	84.1145	66.2211	46.8289	35.0636	28.0123	23.965	22.1761			7.4345	95.3482	1.24791	4	87.0849	1.20421	4	76.675	3.49337	4	62.7995	5.36727
	7.51613	97.0438	87.8362	80.0766	67.8271	38.2203	22.6892	17.9306		94.9776	89.5447	80.4004	69.4352	53.4384	39.6802	24.7379	20.6188		92.1264	87.4153	78.8819	66.2836	52.6722	37.8627	22.7196	18.3604		92.6326	85.0197	65.6654	46.981	35.1298	28.0123	23.6574	22.6505			7.51613	94.1951	1.13462	4	87.454	0.932928	4	76.2561	3.5453	4	62.6317	5.25642
	7.59778	96.2263	87.8137	78.4983	67.6963	38.2373	22.4457	17.5151		94.4916	89.5202	79.9794	69.4713	53.313	39.6802	25.0189	20.5788		91.9547	86.3243	80.273	65.3859	51.7543	37.4877	22.5509	18.0311		92.8191	84.3189	66.176	46.4335	34.8322	27.5613	23.4209	22.4133			7.59778	93.8729	0.944768	4	86.9943	1.10522	4	76.2317	3.37431	4	62.2468	5.33703
	7.6794	94.8759	88.0691	78.4905	67.1978	37.3508	22.5088	17.5255		93.5812	89.1523	79.3263	69.2183	53.3489	39.3721	24.8244	20.2854		92.4542	86.3867	78.8906	65.4111	51.4798	36.9342	22.2829	18.1487		94.6043	84.2313	64.4638	46.251	35.2951	27.6696	23.6574	22.2354			7.6794	93.8789	0.550662	4	86.9598	1.07281	4	75.2928	3.61371	4	62.0195	5.3134
	7.76107	95.7737	87.0924	78.3967	66.3806	36.9758	22.6531	17.4112		94.3219	89.5283	79.8935	69.0194	52.928	39.3432	24.5434	20.6855		92.7819	86.636	79.2993	65.2013	51.7286	36.6217	22.3623	17.8781		92.7125	83.5596	65.6954	46.3726	34.6504	27.3629	23.7994	21.9093			7.76107	93.8975	0.727385	4	86.7041	1.2254	4	75.8212	3.38926	4	61.7435	5.18542
	7.84272	97.2774	88.1668	78.3499	66.871	37.3167	22.4547	17.4527		93.589	88.2449	79.4295	68.5043	52.8653	39.1602	24.3813	20.032		91.3071	86.8854	79.3514	65.1594	51.3683	36.9342	22.5112	18.0193		95.4303	85.3701	64.8543	46.1749	34.3363	27.1104	23.5865	22.3243			7.84272	94.4009	1.27687	4	87.1668	0.675125	4	75.4963	3.55582	4	61.6774	5.21242
	7.92448	98.4599	87.7986	78.2405	66.2417	36.5496	22.0489	17.3488		94.5996	88.9479	78.6647	68.2332	52.9011	39.1602	24.1868	19.5786		92.1654	85.8724	79.6557	64.9329	51.068	36.6932	22.402	17.8899		95.7767	84.5963	63.9832	45.8555	34.3858	27.3629	23.4682	21.4942			7.92448	95.2504	1.30761	4	86.8038	0.971584	4	75.136	3.72942	4	61.3158	5.19791
	8.00628	95.8905	87.9865	78.3655	65.9884	37.223	22.121	17.2969		94.021	88.7354	78.553	68.3778	52.3908	38.5052	24.1003	19.8853		92.3995	86.9321	78.6124	65.2349	50.9822	35.8807	21.9851	17.4194		94.4311	84.1875	64.2836	45.4905	34.1709	27.0382	23.2316	21.85			8.00628	94.1855	0.717876	4	86.9604	0.995547	4	74.9536	3.55707	4	61.2729	5.30328
	8.08787	97.0438	86.9271	78.4514	66.0783	36.4729	21.9407	17.3281		94.2833	88.9071	78.4843	68.5043	51.9251	38.0622	24.3272	20.152		92.1498	86.5035	78.6385	63.8926	49.8499	36.2021	21.9256	17.7605		92.4993	83.9831	64.3286	45.2319	34.0717	26.8038	23.3736	21.2274			8.08787	93.9941	1.11878	4	86.5802	1.01183	4	74.9757	3.54926	4	60.9268	5.31571
	8.16948	96.8905	87.7235	77.2638	65.6697	36.3706	21.7332	17.2554		94.2524	89.1768	79.9278	68.188	51.567	38.0718	23.9922	19.5519		91.549	85.7399	78.169	64.656	50.1501	35.6129	21.7469	17.69		91.8199	83.5742	64.614	44.8821	33.5593	26.7857	22.995	21.7907			8.16948	93.6279	1.24584	4	86.5536	1.21754	4	74.9937	3.50381	4	60.849	5.37381
	8.25127	97.5255	87.6258	77.0607	66.6422	36.0723	21.9948	17.006		94.7848	89.2749	78.9741	67.6909	51.7282	37.6962	23.6788	19.3518		91.4319	85.4672	77.943	63.9933	50.5962	35.7379	21.5186	17.69		94.4578	83.3552	63.5476	44.9278	33.8899	26.5693	23.1606	21.4646			8.25127	94.55	1.24633	4	86.4308	1.28792	4	74.3813	3.63234	4	60.8135	5.3521
	8.33315	97.292	88.0015	77.2013	65.7351	35.4756	21.7874	17.0684		94.075	88.6536	78.6819	67.6367	51.0924	37.7059	23.8193	19.3918		91.8845	85.436	78.1082	64.0604	49.4553	35.4254	21.5484	17.49		94.7109	83.5742	63.5777	45.2167	32.9807	26.461	22.6165	20.842			8.33315	94.4906	1.11283	4	86.4163	1.17462	4	74.3923	3.61773	4	60.6622	5.20006
	8.41502	95.2993	87.9038	78.092	65.7024	35.3222	21.6882	16.9229		94.507	88.1877	78.0976	67.1848	51.2446	37.5036	23.8409	19.3518		91.6426	85.8646	77.5952	63.8674	50.519	35.3093	21.6973	17.1371		91.5268	82.9756	63.7879	45.0798	33.4931	26.461	23.1606	21.1681			8.41502	93.2439	0.971796	4	86.2329	1.20273	4	74.3932	3.53705	4	60.4586	5.17096
	8.4968	95.854	87.3929	77.3185	65.7187	35.2966	21.4357	16.6632		92.9255	87.8525	78.4671	67.3204	50.7253	37.3303	23.7545	19.0718		92.5556	85.9581	76.9258	63.9262	49.3094	34.9433	21.3598	17.2077		91.8865	83.8371	63.4275	44.4411	32.7327	26.7677	22.8294	20.8123			8.4968	93.3054	0.876321	4	86.2602	0.902843	4	74.0347	3.55084	4	60.3516	5.34862
	8.57827	96.7445	86.5289	76.6935	64.6891	35.5182	21.0298	16.8814		94.5842	88.5474	78.2866	67.1667	50.0985	37.0702	23.7328	19.5786		92.6648	86.075	78.3516	63.3305	49.0349	34.6219	21.6278	17.3253		92.3928	83.4574	63.5476	44.2586	32.9972	26.2266	22.6402	20.9902			8.57827	94.0966	1.00839	4	86.1522	1.04668	4	74.2198	3.57801	4	59.8612	5.26116
	8.65998	97.5766	87.4455	77.1545	64.9587	35.058	21.2012	16.9852		94.075	88.2613	78.1664	66.6787	50.385	36.8487	23.2681	19.0851		91.4865	85.1555	77.5604	63.8842	49.1379	34.8272	21.2308	16.9607		92.4194	83.2676	63.0069	44.4411	32.9807	26.4069	22.6402	21.4053			8.65998	93.8894	1.34055	4	86.0325	1.13202	4	73.972	3.66095	4	59.9907	5.21506
	8.74162	98.2701	87.3929	77.2326	63.9536	34.5721	21.0028	16.4762		93.3344	88.1959	77.8656	66.5974	50.0448	36.7331	23.1168	19.2185		91.7362	85.436	77.43	63.2634	48.7261	34.729	21.2308	17.0666		93.1921	83.545	63.112	43.8935	32.5178	25.5952	22.4746	21.0792			8.74162	94.1332	1.42545	4	86.1425	1.04187	4	73.9101	3.60177	4	59.427	5.22742
	8.82335	94.7956	87.2276	76.2325	64.5501	34.4016	20.8675	16.6944		94.4067	88.0814	77.6852	66.516	50.009	36.7909	23.0412	19.3385		91.986	85.436	77.4996	63.5067	48.22	34.0595	21.1911	16.8196		92.6592	83.0048	62.6464	44.1065	32.4516	26.2085	22.6875	20.4566			8.82335	93.4619	0.676649	4	85.9375	1.12224	4	73.5159	3.63751	4	59.6698	5.22516
	8.90498	95.7299	87.0624	77.7639	64.4276	34.4357	20.7683	16.5697		93.9516	88.3103	77.7195	66.6787	49.3822	36.5212	23.0304	18.565		92.2279	85.7633	76.8388	62.4581	47.6452	33.9255	20.6253	17.196		91.8199	83.1654	62.2259	43.8479	32.4682	25.9921	22.4509	20.753			8.90498	93.4323	0.894394	4	86.0753	1.10054	4	73.637	3.80967	4	59.3531	5.2398
	8.98677	96.4015	86.266	77.3107	64.0026	34.717	20.6691	16.4139		93.0721	88.2694	76.8689	66.498	49.5165	36.1553	22.9979	19.2185		91.8689	85.6776	77.0388	63.0537	48.1942	33.8541	20.8734	16.9372		91.9531	83.472	62.6464	43.2243	32.121	25.5592	22.6165	20.3083			8.98677	93.3239	1.06187	4	85.9213	0.987035	4	73.4662	3.60774	4	59.1947	5.37276
	9.06853	97.562	87.2502	76.2403	63.7411	34.1971	20.7683	16.2269		93.751	87.7299	78.3038	66.0461	49.1404	36.1553	22.6737	18.5916		93.2111	85.7711	76.804	62.0721	47.5937	33.5506	20.8536	16.5255		95.3637	83.8517	62.7516	43.2852	32.2698	25.3968	22.5455	20.6345			9.06853	94.9719	0.976965	4	86.1507	0.872377	4	73.5249	3.61742	4	58.7861	5.23081
	9.15023	97.4818	86.9196	76.4278	64.3785	34.0948	20.579	16.1646		92.8329	88.2367	77.1696	65.531	48.8001	35.8567	22.6629	18.7917		91.7831	85.8568	76.6823	62.6426	47.7052	33.4702	20.9628	17.2077		92.2862	83.5158	61.3698	43.4373	32.2202	25.4329	22.5692	20.5455			9.15023	93.596	1.31288	4	86.1322	0.998762	4	72.9124	3.85061	4	58.9973	5.22055
	9.23197	96.6277	86.9872	76.7326	63.3652	33.7624	20.624	16.4866		93.5504	87.9506	77.7711	66.2088	49.6597	35.7315	22.8466	18.8984		91.2212	85.4516	76.0129	61.9211	47.7138	33.5327	20.7543	17.1019		94.3512	82.4792	61.3247	43.0114	31.7243	25.8658	21.8358	19.9822			9.23197	93.9376	1.11567	4	85.7172	1.1957	4	72.9603	3.89528	4	58.6266	5.28072
	9.3137	96.1022	87.2953	76.4982	63.5777	33.5152	20.7503	16.4035		93.2958	87.8117	77.2813	65.54	49.1135	35.3077	22.3603	18.2049		91.0417	85.4282	76.3172	61.7114	47.2334	32.6846	20.8337	16.4432		92.2995	82.012	61.1595	42.8745	31.4597	25.5231	22.4982	20.1304			9.3137	93.1848	1.07626	4	85.6368	1.31223	4	72.814	3.89047	4	58.4259	5.24238
	9.39525	97.4818	86.8445	75.8028	63.1609	33.4385	20.2633	16.0918		93.8513	88.0814	76.044	64.826	48.639	35.1729	22.3171	18.7917		92.1888	84.5788	76.5867	61.745	47.1562	32.9524	20.6849	16.4785		94.1647	82.9756	61.0694	42.1445	31.4928	25.3247	22.1197	19.6857			9.39525	94.4216	1.10834	4	85.6201	1.14144	4	72.3757	3.77234	4	57.9691	5.31231
	9.47698	96.8832	86.7318	75.5528	63.0955	33.3703	20.5339	16.1646		93.1801	87.7136	76.8947	64.4826	48.1017	34.8262	22.3603	18.4716		92.2981	84.5477	76.1433	61.5436	46.6758	32.9881	20.397	16.5138		92.0464	83.2092	61.4749	42.2814	31.4102	25.1984	21.5992	19.4189			9.47698	93.6019	1.12044	4	85.5506	1.02313	4	72.5164	3.69072	4	57.8508	5.2244
	9.55878	95.6569	86.6191	75.0684	63.1446	32.8418	20.6691	16.2061		93.0721	87.4438	77.1009	65.2146	47.8689	34.6913	22.0793	18.565		91.3461	84.7347	75.6216	60.797	46.3069	32.4971	20.2581	16.3961		94.2446	82.0704	60.739	42.2053	31.1622	25.0361	21.6702	19.7747			9.55878	93.5799	0.913041	4	85.217	1.19228	4	72.1325	3.82199	4	57.8404	5.28922
	9.64063	96.9051	85.6499	76.0372	63.5532	33.0634	20.2633	15.9152		93.3498	87.1659	76.4049	64.6272	48.1286	34.4891	22.0793	18.565		91.2837	85.3892	75.8911	61.3171	46.4614	32.6846	20.1489	16.1021		91.5001	81.8514	60.2884	41.7947	31.2944	25	21.4573	19.6857			9.64063	93.2597	1.30058	4	85.0141	1.12464	4	72.1554	3.95715	4	57.823	5.38708
	9.72227	96.5839	86.2735	74.998	62.5725	33.0464	20.119	15.9672		93.3729	87.5828	76.8861	64.347	47.6271	34.9321	22.0253	17.9248		90.792	83.8541	75.8303	60.7802	45.9724	32.2114	20.0893	16.3609		94.218	81.5448	61.2196	41.384	31.1952	24.5851	21.1024	19.7154			9.72227	93.7417	1.19519	4	84.8138	1.33559	4	72.2335	3.69157	4	57.2709	5.34546
	9.80398	95.7664	86.6566	75.4043	63.1119	32.5605	20.101	15.7802		94.0518	86.986	76.1041	64.4013	47.1347	35.2018	22.0793	18.4583		91.19	83.6359	75.5869	60.4446	45.7236	31.9168	20.0397	16.1374		91.4335	81.5448	60.8291	41.5209	31.1456	25.2525	21.5992	19.7747			9.80398	93.1104	1.09699	4	84.7058	1.29557	4	71.9811	3.72029	4	57.3697	5.34677
	9.88575	94.9343	86.1833	74.6933	62.6134	32.6287	20.0649	15.8945		93.0566	87.3866	75.6487	64.0307	47.5197	33.7282	21.928	17.8448		90.4175	85.2256	74.4827	60.3188	46.3327	31.7829	20.1985	15.9492		93.7383	82.2018	59.8678	41.5817	30.8315	24.9639	21.7175	19.834			9.88575	93.0367	0.95542	4	85.2493	1.10786	4	71.1732	3.77697	4	57.1362	5.2409
	9.96735	97.4745	86.3186	75.67	62.2375	32.2707	19.9928	15.6971		93.1646	87.3621	75.5113	64.1301	46.8213	34.8262	22.0145	18.1515		91.0496	84.4074	75.2478	60.6544	45.8351	31.9346	19.871	16.255		94.4977	81.939	60.6038	41.0342	30.8481	24.9459	21.6229	19.241			9.96735	94.0466	1.34517	4	85.0067	1.1916	4	71.7582	3.71916	4	57.014	5.37378
	10.049	96.5693	85.8077	74.5605	61.6164	32.2707	19.5058	15.5828		93.0952	86.9533	76.1471	64.338	47.7077	34.152	21.6146	17.7114		91.151	84.5165	74.6218	60.9396	45.6464	31.8186	19.9305	16.0198		92.2862	81.3987	59.6275	41.2471	30.5836	24.4408	21.5992	19.4189			10.049	93.2754	1.16813	4	84.669	1.19835	4	71.2392	3.88793	4	57.0353	5.3137
	10.1309	97.0365	86.7543	75.2324	61.1506	31.9553	19.587	15.6659		93.5504	87.4765	76.3963	64.0398	46.7676	34.0557	21.9496	18.0982		91.6192	84.2515	74.8392	60.193	45.3376	31.9168	19.9901	16.3961		92.2728	81.7784	60.2734	41.3384	30.6001	24.7294	21.3627	19.1521			10.1309	93.6197	1.20745	4	85.0652	1.29528	4	71.6853	3.81832	4	56.6804	5.17895
	10.2128	96.5547	85.5597	74.9668	61.3958	31.7508	20.0649	15.5101		93.2726	87.3539	75.2621	63.606	46.0781	33.5548	21.9064	17.5247		91.1978	84.3606	74.2132	59.9664	44.9344	31.6222	19.7022	15.8669		92.7125	81.9098	59.8528	41.3384	30.9473	24.7655	21.3863	19.3003			10.2128	93.4344	1.12865	4	84.796	1.14185	4	71.0737	3.74681	4	56.5766	5.13428
	10.2944	96.1679	86.3411	74.4433	61.5919	31.8019	19.4247	15.3231		92.8098	87.0351	75.6058	62.6209	46.4989	33.7186	21.7011	18.1382		91.4631	83.6749	74.787	59.4883	44.7285	31.5597	19.3846	16.2197		90.9539	81.4279	60.018	40.8213	30.3521	24.531	21.6939	19.1224			10.2944	92.8487	1.17362	4	84.6198	1.28702	4	71.2135	3.73979	4	56.1306	5.14456
	10.3761	95.3723	85.9053	74.3496	61.1179	31.5632	19.3705	15.5309		93.3421	86.7326	75.0301	63.4433	45.8453	34.1327	21.7551	17.8181		90.4331	85.0775	74.8131	59.9916	44.5655	31.0329	19.6427	15.7845		91.9265	81.5302	59.4773	40.8365	30.5174	24.6392	21.1024	18.4999			10.3761	92.7685	1.05165	4	84.8114	1.14474	4	70.9175	3.81604	4	56.3473	5.21998
	10.4579	96.4964	85.988	73.326	61.4203	31.2138	19.2172	15.6867		93.4038	86.5282	75.5456	62.6751	46.1049	33.4682	21.366	17.8848		91.3461	84.7736	74.2567	59.8406	45.0116	30.7383	19.603	16.1962		92.1263	81.0629	59.0267	40.8061	30.3356	24.3326	20.8185	18.5591			10.4579	93.3431	1.13341	4	84.5882	1.23102	4	70.5388	3.86423	4	56.1855	5.15917
	10.5396	94.7226	84.4628	74.5683	61.0199	31.4865	19.1541	15.5205		93.9593	87.1168	74.7637	63.2083	45.2095	33.4296	21.5282	17.8181		91.6114	84.5788	73.3785	59.2114	44.2652	30.5866	19.5533	15.6787		91.3003	80.7125	59.3872	40.7452	29.9884	24.3326	21.0551	18.8556			10.5396	92.8984	0.849687	4	84.2177	1.31915	4	70.5244	3.72501	4	56.0462	5.16536
	10.6213	96.4964	86.1683	74.7246	60.7502	31.0859	19.623	15.5205		92.478	86.8225	75.2449	62.8016	45.7289	33.0926	21.2688	17.4713		90.4799	85.0308	73.735	58.6661	44.4282	30.6937	19.4839	15.6551		92.486	81.2527	58.6212	40.4715	29.6082	23.9719	20.9841	18.9742			10.6213	92.9851	1.26198	4	84.8186	1.24492	4	70.5814	3.99902	4	55.6724	5.1368
	10.7029	97.6934	86.3336	74.3808	61.1097	30.9751	19.4156	15.2192		93.3575	87.4029	74.7551	62.5305	45.7468	33.1503	21.1067	17.6981		91.0339	84.01	74.1089	59.2198	44.5912	30.9883	19.3449	15.514		92.3128	81.3987	59.3271	40.0304	29.6743	23.9899	21.1498	18.5295			10.7029	93.5994	1.445	4	84.7863	1.33289	4	70.643	3.77427	4	55.7226	5.2745
	10.7846	94.6861	85.3418	72.951	60.8482	30.9836	19.1	15.1776		93.7201	86.6018	75.2191	62.2775	45.4782	32.8999	20.9554	17.4847		90.792	83.3398	73.0829	58.6661	43.7334	30.3901	19.603	15.5258		91.3269	80.6395	57.7801	39.8023	30.0711	24.1703	21.0315	18.5295			10.7846	92.6313	0.93506	4	83.9808	1.30055	4	69.7583	4.02641	4	55.3985	5.2515
	10.8662	96.3358	86.4613	73.326	60.7992	30.8387	19.1271	15.053		93.4578	86.4138	74.6606	62.2413	44.6633	32.871	21.0959	17.7647		90.0897	83.3788	73.935	58.5654	43.8792	30.6937	19.0372	15.561		93.3253	80.2891	58.1256	39.9087	29.2941	24.0079	20.9132	18.5295			10.8662	93.3022	1.2763	4	84.1357	1.47104	4	70.0118	3.97145	4	55.3787	5.21178
	10.9479	96.3504	85.9053	74.2011	60.1536	30.6768	19.2172	15.1153		93.4964	87.3866	74.1193	61.8346	44.9678	32.8614	21.0418	17.5513		90.5345	83.7217	73.7176	58.3054	43.9736	30.408	19.2854	15.9139		91.7799	81.0191	58.1856	39.7871	29.6909	23.7554	20.7003	18.737			10.9479	93.0403	1.25936	4	84.5082	1.38532	4	70.0559	3.95817	4	55.0202	5.12859
	11.0297	94.9781	85.8002	73.7167	60.3334	30.5404	18.7573	15.0114		93.3729	86.6836	73.7068	62.1419	44.529	32.428	20.5447	17.578		90.3785	83.0359	73.2047	57.6762	43.4674	30.2652	19.1067	15.2788		93.9115	80.5227	57.4947	39.9392	29.4925	23.4848	20.511	18.6184			11.0297	93.1603	0.985419	4	84.0106	1.39829	4	69.5307	4.01378	4	55.0227	5.11078
	11.1115	96.3942	85.2893	73.5136	60.1373	30.8132	18.7844	15.2608		92.9872	86.798	74.4973	62.0967	44.6723	32.1294	21.031	17.0579		90.9169	83.5502	73.5176	57.8859	43.253	30.4259	18.928	15.1611		93.1921	80.2891	57.705	39.6046	29.261	23.9177	20.582	18.5591			11.1115	93.3726	1.13069	4	83.9816	1.3983	4	69.8084	4.04109	4	54.9311	5.18077
	11.193	95.4745	85.6123	73.8651	60.2435	30.0034	18.7032	15.053		92.4549	86.8798	74.4028	62.0425	44.4126	32.062	20.9229	17.338		91.1432	84.0411	73.2394	57.9111	43.2787	30.1134	18.7891	15.4552		94.6843	80.5665	57.5698	39.2548	29.4264	23.6111	21.0788	18.5295			11.193	93.4392	0.997203	4	84.2749	1.36567	4	69.7693	4.07343	4	54.863	5.27101
	11.2746	96.9635	85.7175	73.7401	59.8758	30.1227	18.6401	15.1984		93.4115	86.5119	73.9646	62.1148	44.6186	31.7538	20.6311	17.6314		89.6606	83.1216	74.0393	57.693	42.6954	29.8813	19.0868	15.3964		93.6184	80.2599	57.1343	39.7567	29.228	24.026	20.2271	18.1441			11.2746	93.4135	1.49246	4	83.9027	1.41367	4	69.7196	4.19558	4	54.86	5.11474
	11.3563	96.9489	85.0639	72.6854	59.8758	30.1995	18.5229	14.866		92.6246	86.8225	73.6467	61.8346	44.3499	31.9753	20.4907	17.2046		90.4643	83.0203	72.5265	57.7936	42.764	29.417	18.8387	15.4787		91.0605	79.4569	57.1643	38.9962	28.5171	23.9358	20.44	18.322			11.3563	92.7746	1.4641	4	83.5909	1.5819	4	69.0057	3.95488	4	54.6251	5.27454
	11.4381	96.9051	84.9962	73.5995	59.3855	29.6966	18.577	14.7413		92.3777	85.9397	74.1021	61.5273	44.2693	31.8598	20.8041	17.338		90.199	82.545	72.3266	57.1141	42.5581	29.6134	18.9677	15.1494		90.461	81.2235	57.5849	38.9658	29.1618	23.7915	20.2271	17.9069			11.4381	92.4857	1.55111	4	83.6761	1.08631	4	69.4032	3.95714	4	54.2482	5.17319
	11.5199	95.5036	85.5823	73.412	59.2874	29.5772	18.613	14.8244		93.1569	86.4056	74.0849	61.2562	44.0007	32.1391	20.75	16.8845		89.9493	82.6853	72.7178	57.3909	42.4809	29.3813	18.8486	15.0435		93.4985	80.4205	57.7801	39.0266	29.0296	23.7193	20.1088	18.0255			11.5199	93.0271	1.14911	4	83.7734	1.37315	4	69.4987	3.91615	4	54.2403	5.13224
	11.6015	95.8394	84.7258	72.5135	59.3936	29.3727	18.3154	14.7309		92.6092	86.0296	73.449	61.202	43.6426	31.6383	20.2745	17.1112		90.6282	83.8541	72.8743	57.1477	42.2407	29.542	18.8586	15.4905		91.2204	79.267	56.4284	38.6312	29.0131	23.6111	20.1325	18.0848			11.6015	92.5743	1.16486	4	83.4691	1.47028	4	68.8163	4.1338	4	54.0936	5.22042
	11.6835	94.7664	84.7708	72.4353	59.3855	29.4238	18.586	14.6167		93.7432	86.1686	73.0022	61.193	43.4545	31.4649	20.3177	16.7911		90.8545	83.2541	71.5528	57.0889	41.889	29.2117	18.8486	15.0553		93.5651	80.2453	56.954	38.1901	28.8643	23.3586	20.1088	17.9366			11.6835	93.2323	0.835636	4	83.6097	1.26957	4	68.4861	3.85557	4	53.9644	5.32471
	11.7651	95.7153	85.0639	72.0759	59.2547	29.3982	18.6581	14.8764		92.7557	85.6209	73.1655	60.9851	43.1053	31.2337	20.3826	16.8578		91.112	83.3866	71.9614	56.8037	42.4466	29.1313	18.4417	15.0553		92.0197	79.9679	56.2631	38.4639	29.0131	23.3225	19.9905	18.1441			11.7651	92.9007	0.996611	4	83.5098	1.27253	4	68.3665	4.04356	4	53.8768	5.20876
	11.8467	96.5839	85.1766	72.7947	58.7154	29.3982	18.6762	14.6271		93.5812	85.8661	73.2342	60.4067	43.3829	31.3204	20.3177	16.7378		91.1354	83.3554	72.4222	57.005	41.9233	29.2027	18.6005	15.2435		91.1537	79.8657	56.7738	38.7833	28.4675	23.2504	20.0852	17.7587			11.8467	93.1136	1.29152	4	83.5659	1.3423	4	68.8062	4.01424	4	53.7276	5.0296
	11.9286	96.2555	85.5297	72.0447	59.3936	29.2278	18.3876	14.6894		93.4655	86.2585	73.1397	60.9761	43.3381	31.2626	20.3069	16.8845		89.5045	83.41	71.4224	56.896	41.7689	28.9081	18.402	14.8318		91.4069	79.2816	56.0228	38.0837	28.5667	23.2504	20.0142	17.7587			11.9286	92.6581	1.44637	4	83.6199	1.56721	4	68.1574	4.0604	4	53.8373	5.31795
	12.0103	96.1022	84.9361	72.0838	58.4048	29.1425	18.3786	14.4089		92.2311	86.0541	73.724	60.0813	43.356	30.8581	20.2853	16.431		90.0195	83.7684	71.6136	55.9899	41.7346	28.676	18.6799	14.7612		93.312	79.4131	56.0078	37.6578	28.484	23.0519	20.2744	17.4918			12.0103	92.9162	1.26383	4	83.5429	1.45355	4	68.3573	4.14127	4	53.0335	5.19356
	12.0919	96.2336	85.4095	71.865	58.65	29.0743	18.1441	14.2946		92.8329	86.5037	73.217	60.5332	42.8098	30.8003	20.1016	16.8845		90.4409	83.2463	71.8658	56.3674	41.3485	28.7117	18.5012	15.0553		91.5934	79.2232	56.5185	38.8593	28.1865	22.8175	19.683	17.5511			12.0919	92.7752	1.25198	4	83.5957	1.60693	4	68.3666	3.9622	4	53.6025	4.98764
	12.1736	95.0876	84.4853	71.8337	58.4702	28.5714	18.0539	14.2427		93.0875	86.6672	73.4147	59.5481	42.6665	31.0604	20.3177	17.0579		90.1444	83.332	71.1528	55.9983	41.4172	28.3903	18.5608	14.8671		94.5777	78.7414	56.6086	37.6274	28.0708	23.1421	19.9432	17.6401			12.1736	93.2243	1.11086	4	83.3065	1.67144	4	68.2525	3.91009	4	52.911	5.14844
	12.2554	96.7153	84.275	71.6384	57.841	28.6396	18.0179	14.4089		93.0103	85.3102	72.4179	60.4338	42.8188	30.8389	20.134	16.6444		90.5501	83.1061	70.9877	56.1577	41.0912	28.2832	18.5112	14.6789		93.2188	79.9679	55.7375	37.9163	28.1369	23.2684	19.9432	17.1064			12.2554	93.3736	1.26804	4	83.1648	1.15683	4	67.6954	3.99668	4	53.0872	5.13285
	12.3372	94.3796	84.7558	71.6775	57.3997	29.2448	18.2163	14.2115		93.1415	85.7598	72.1774	60.0452	42.2099	30.6655	19.9179	16.3644		90.5813	83.332	71.3093	56.1913	41.1169	28.3278	18.2134	15.0082		90.9006	79.4861	56.143	37.4753	28.1038	22.9437	19.8959	17.3436			12.3372	92.2508	0.9099	4	83.3334	1.37577	4	67.8268	3.89866	4	52.7779	5.16394
	12.419	95.365	84.7558	72.1384	57.8001	28.5629	17.8555	14.1907		92.6709	85.7598	72.0914	60.0362	41.8875	30.5885	20.0584	16.6311		89.5591	82.5995	71.0572	55.4279	40.9968	28.31	18.3325	14.9965		91.1537	79.4131	55.8576	37.1407	27.5913	22.6912	19.6357	17.0471			12.419	92.1872	1.23515	4	83.1321	1.40405	4	67.7862	3.98401	4	52.6012	5.23868
	12.5007	94.9781	84.3351	71.3728	58.2659	28.4265	17.9006	14.0661		92.8946	85.4492	72.1258	58.9788	42.1383	30.3381	19.6477	16.2177		90.2458	82.6775	71.3876	55.8221	40.7052	28.2653	18.4318	14.7495		90.1945	78.5516	55.422	37.2167	28.0873	22.9437	19.8486	17.4029			12.5007	92.0783	1.15405	4	82.7533	1.51189	4	67.577	4.05548	4	52.5709	5.16248
	12.5825	94.6788	85.1165	71.7869	57.7838	28.1793	18.0088	14.1284		92.8792	86.0623	72.1945	59.5933	41.6995	29.8469	19.9611	16.4711		90.0897	82.4359	71.4137	55.5201	40.4392	28.4082	17.9057	14.7024		90.381	79.6467	55.0916	37.0798	27.7732	22.7994	19.7303	17.1361			12.5825	92.0072	1.08854	4	83.3153	1.44402	4	67.6217	4.17973	4	52.4943	5.20525
	12.6641	94.9416	85.0188	71.1774	57.653	28.614	17.9096	14.3466		92.9409	85.6944	71.9024	59.0601	41.592	30.0876	19.8746	16.6044		90.1912	81.9762	70.4225	54.9497	40.139	27.9172	18.0844	14.6436		90.8606	79.4277	54.5059	36.6844	28.0542	22.2763	19.4701	17.3436			12.6641	92.2336	1.07588	4	83.0293	1.44747	4	67.0021	4.17634	4	52.0868	5.20448
	12.7459	94.7737	84.2374	71.7712	57.4242	28.2901	17.9006	14.3881		92.1154	86.0868	72.0313	59.042	41.592	29.7506	19.853	16.3244		89.9103	83.1061	70.8399	55.4027	40.1304	28.0868	17.8859	14.279		95.4703	78.3326	55.2869	37.3232	28.1038	22.1681	19.4701	16.8989			12.7459	93.0674	1.27669	4	82.9407	1.65432	4	67.4823	4.07318	4	52.298	5.04681
	12.8275	96.2336	83.9745	70.3336	57.2444	28.1964	17.6301	14.0349		92.2466	84.5827	71.7907	58.4275	41.1712	29.818	19.6261	16.5377		90.3472	82.8411	70.5095	55.3859	40.4907	27.9261	17.8462	14.2319		93.6584	79.0626	54.5359	37.3232	27.4095	22.7633	19.4464	17.1954			12.8275	93.1215	1.23946	4	82.6152	1.23795	4	66.7924	4.09839	4	52.0952	4.96364
	12.9092	95.5328	84.4628	70.8649	57.604	28.2987	17.7203	13.9102		92.5397	85.8089	71.7821	58.3642	41.5204	30.001	19.4532	16.0309		90.16	81.8982	70.2226	54.6141	40.2934	27.9529	18.0149	15.1964		92.2995	78.7414	54.9865	37.0951	27.2772	22.4206	19.5647	17.0175			12.9092	92.633	1.10472	4	82.7278	1.55678	4	66.964	4.00531	4	51.9193	5.00727
	12.991	94.2044	85.0263	71.2399	57.0401	27.864	17.8014	14.2738		92.6786	85.1958	72.1945	58.6444	41.404	29.7217	19.518	16.4444		89.4265	82.4047	70.5529	54.9245	39.8988	27.5154	17.8759	14.5613		91.5268	79.194	54.5359	36.73	27.7071	22.4928	19.3991	17.1954			12.991	91.9591	1.00665	4	82.9552	1.40709	4	67.1308	4.21178	4	51.8348	5.0922
	13.0727	94.3431	83.6289	71.9119	56.5743	27.6509	17.5038	14.0972		92.2929	84.8361	71.3009	58.6173	41.0369	29.9721	19.4748	16.3244		89.762	82.5606	71.2833	54.698	39.9502	27.3993	17.6675	14.7848		94.5244	77.9822	54.581	36.1369	27.5087	22.4206	19.5174	17.0768			13.0727	92.7306	1.11138	4	82.2519	1.49721	4	67.2692	4.23195	4	51.5066	5.18537
	13.1545	94.6131	84.1773	70.5133	56.4436	27.7105	17.8104	14.0349		93.0566	85.3429	71.868	59.4577	40.8309	29.635	19.4964	16.6978		89.6449	82.7944	69.8487	54.2282	39.9502	27.5154	17.8462	14.1143		90.2878	78.5954	54.7462	36.5932	27.2111	22.132	19.2572	16.8396			13.1545	91.9006	1.16846	4	82.7275	1.47255	4	66.7441	4.0213	4	51.6807	5.14207
	13.2363	93.1971	83.9594	70.7165	56.6315	27.4974	17.4858	13.9414		91.8145	85.2448	71.6016	58.2196	41.3055	29.7217	19.1505	15.9376		89.0441	81.6489	69.8922	54.0604	39.3755	27.81	17.6873	14.0202		91.207	77.6464	54.4758	36.5932	27.0458	22.4026	19.1389	16.9286			13.2363	91.3157	0.86412	4	82.1249	1.66792	4	66.6715	4.08019	4	51.3762	5.00162
	13.3178	95.1971	84.1322	71.1071	56.8522	27.4804	17.3686	13.8167		91.7682	84.5418	71.1119	59.4216	40.7951	30.001	19.5072	16.0576		90.5892	82.319	70.579	53.6745	39.6757	27.4351	17.5484	14.079		92.8324	77.6172	54.4308	36.6996	27.4591	22.3124	19.3045	16.5135			13.3178	92.5967	0.980396	4	82.1526	1.58706	4	66.8072	4.12737	4	51.662	5.12406
	13.3995	95.3942	84.6281	70.1227	55.9614	27.523	17.3686	13.9414		92.1231	84.5255	70.9142	57.596	40.5176	29.5387	19.1614	16.3244		89.6528	81.6489	69.8574	54.2366	39.3497	27.1226	17.4988	14.2908		89.9281	77.9822	54.4608	36.4715	26.6986	22.096	19.4701	16.6024			13.3995	91.7745	1.32711	4	82.1962	1.56517	4	66.3388	3.96569	4	51.0664	4.91307
	13.4811	95.8467	84.0646	70.2946	55.9696	27.165	17.585	14.0661		92.1463	84.8279	71.5673	57.5779	40.5623	29.3172	19.237	15.8976		89.5279	82.3112	70.0574	54.1862	39.2554	26.7744	17.7965	14.1731		92.8857	77.588	54.5209	36.0913	27.6244	21.9697	19.3518	16.8693			13.4811	92.6016	1.29957	4	82.1979	1.62445	4	66.61	4.04333	4	50.9563	5.00318
	13.5628	96.1533	84.1022	71.0759	56.1821	27.1139	17.2333	13.8583		91.9997	84.3783	71.1462	57.6322	40.034	29.0186	19.1181	15.9509		89.2548	82.5138	69.3184	53.0789	39.1181	27.0244	17.5484	14.0202		92.0997	78.902	53.6197	36.0608	26.9135	22.096	19.1152	16.4245			13.5628	92.3769	1.42091	4	82.4741	1.25956	4	66.2901	4.24456	4	50.7385	4.98386
	13.6444	94.0657	83.9519	69.9508	56.4272	27.6509	17.2513	13.7025		92.2543	84.9914	71.0517	57.6502	40.3295	29.2497	19.2694	15.9376		89.6137	81.9528	69.4749	53.9765	39.1181	26.8726	17.4591	13.9497		90.9672	78.1574	53.5446	36.6084	27.3103	22.2583	19.0916	16.3653			13.6444	91.7252	0.948272	4	82.2634	1.5069	4	66.0055	4.16673	4	51.1656	4.91214
	13.7261	95.3139	84.4177	70.2399	56.0758	27.0031	17.4678	13.7752		92.2543	85.114	71.3353	57.4966	40.7504	29.3653	19.1614	16.111		90.2224	82.0073	69.9009	53.4648	38.9551	26.828	17.8065	13.9967		90.2345	77.1792	54.4608	35.9392	26.8474	22.0418	19.0679	16.6321			13.7261	92.0063	1.2015	4	82.1796	1.79477	4	66.4842	4.01947	4	50.7441	5.0051
	13.8077	94.146	84.0947	70.654	55.8388	26.7218	17.3866	13.5882		92.4394	85.2367	71.3868	56.3488	40.231	28.8838	18.9344	15.8976		90.16	81.8125	68.8576	53.7416	38.9294	26.5244	17.2407	13.9379		91.6334	77.5004	53.094	35.6958	26.7152	22.3485	18.8313	16.3356			13.8077	92.0947	0.830795	4	82.1611	1.70884	4	65.9981	4.33405	4	50.4063	4.93583
	13.8894	96.2409	83.426	70.5915	55.9778	26.8411	17.0529	13.8687		91.6911	84.4764	71.2751	57.1803	40.0788	28.9319	18.9884	16.231		90.6672	80.9631	69.1184	53.3389	38.389	26.4887	17.4293	13.8908		89.8215	77.515	53.4845	35.346	26.6656	22.114	19.0916	15.8909			13.8894	92.1052	1.43058	4	81.5951	1.54653	4	66.1174	4.23492	4	50.4608	5.10171
	13.971	94.7664	83.6965	69.1538	55.6264	26.9349	17.1341	13.5674		92.5629	84.9914	70.33	57.0628	40.1415	28.8741	18.8696	15.6308		89.4343	81.906	68.8489	52.8775	38.3975	26.4619	17.4591	13.832		90.9805	77.5734	53.4695	35.8783	26.897	22.0418	18.855	16.1874			13.971	91.936	1.13929	4	82.0418	1.61822	4	65.4506	4.00642	4	50.3613	4.90509
	14.0526	95.2117	83.1104	69.857	56.0513	26.8837	17.2153	13.7856		92.4472	84.738	70.4417	57.0357	39.6848	28.1903	18.7831	15.6042		89.2704	82.4281	69.0662	52.4748	38.1745	26.6137	17.3995	13.6203		91.5401	78.1136	53.7549	35.4829	26.4341	21.8074	18.9023	16.1874			14.0526	92.1173	1.22889	4	82.0975	1.4136	4	65.78	4.01825	4	50.2612	5.0226
	14.1344	96.4672	83.7265	68.9038	55.5283	26.5257	16.9537	13.9102		92.6632	84.4601	70.4331	57.1351	39.2461	28.3637	18.5778	15.3107		88.771	82.6697	69.4401	52.6594	38.1316	26.6316	17.4888	13.585		89.9947	77.9968	53.0039	35.346	26.7482	21.9697	18.5711	16.306			14.1344	91.974	1.70393	4	82.2133	1.45273	4	65.4452	4.15918	4	50.1672	5.02636
	14.2159	95.4526	83.0729	70.2555	56.558	26.6962	16.9447	13.3908		92.4317	83.7325	69.9777	56.4573	39.5595	28.903	18.9236	15.6708		90.2926	82.1632	68.7272	52.8943	38.1316	26.7119	17.1414	13.6791		90.4743	77.2084	52.8537	35.5894	26.5002	21.7172	18.4765	15.9798			14.2159	92.1628	1.19873	4	81.5442	1.48066	4	65.4535	4.21306	4	50.3747	5.00155
	14.2976	93.635	84.2524	70.107	54.1799	26.3041	17.3235	13.5778		92.1463	84.0186	69.8574	56.4934	39.3804	28.3733	18.7399	15.5642		90.0429	82.4515	68.449	52.2735	37.6255	26.5601	17.2605	13.5145		92.3528	77.0477	52.5533	35.2548	26.5498	21.8074	18.784	16.0095			14.2976	92.0443	0.74395	4	81.9426	1.67988	4	65.2417	4.24517	4	49.5504	4.84269
	14.3792	95.4526	83.2908	69.3023	55.1606	26.6451	17.098	13.6817		91.7142	84.8361	69.6426	56.7917	38.9148	28.2674	18.7615	15.7375		90.238	82.4203	68.5881	52.6342	38.0887	26.2119	17.1514	13.6321		91.0871	77.3544	52.1478	35.711	26.3515	21.3384	18.5711	15.802			14.3792	92.123	1.15033	4	81.9754	1.6193	4	64.9202	4.26313	4	50.0744	4.86356
	14.461	95.2044	83.6739	69.482	54.4741	26.3638	16.9898	13.5986		91.4211	84.689	71.1978	56.1591	39.1655	28.1999	18.8479	15.4308		89.5045	81.1735	68.023	52.844	37.8313	26.4619	17.1414	13.6321		89.6882	77.4128	53.109	34.7072	25.9051	21.7713	19.1152	15.713			14.461	91.4545	1.3224	4	81.7373	1.61973	4	65.4529	4.16547	4	49.5461	4.99237
	14.5426	95.3723	82.9452	69.0757	55.0952	26.1933	17.0439	13.6817		92.5243	84.8524	69.9948	56.0054	38.6461	28.1614	18.6858	15.2707		90.2614	81.7736	67.8578	52.0721	37.4968	25.9263	16.9032	13.7262		92.3395	76.2301	52.4932	35.0266	25.9051	21.7172	18.855	16.1577			14.5426	92.6244	1.04983	4	81.4503	1.85212	4	64.8554	4.14389	4	49.5498	4.91351
	14.6242	95.4672	83.8542	69.6461	55.1442	26.1337	17.0439	13.3285		92.1771	84.0186	70.1151	55.9964	39.3266	28.5178	18.7507	15.3374		89.5357	82.2879	68.362	52.4077	37.6083	26.1048	17.072	14.0202		90.8606	76.9455	52.5083	34.8289	26.4837	21.7532	18.6657	15.4165			14.6242	92.0102	1.27224	4	81.7766	1.6569	4	65.1579	4.23279	4	49.5943	4.98097
	14.7061	94.9051	83.8317	69.982	54.3025	26.2189	16.8275	13.3493		92.4163	84.0105	69.7543	56.2675	39.1117	28.2096	18.5237	15.6708		89.9805	81.6489	67.8317	51.9799	37.2737	26.1048	17.0025	13.3733		89.3818	77.1792	52.1628	35.0266	26.1696	21.5368	18.7367	15.713			14.7061	91.6709	1.26204	4	81.6675	1.58952	4	64.9327	4.28386	4	49.3941	4.86867
	14.7878	94.5766	83.0579	70.1617	54.3189	26.3723	16.4668	13.2765		92.1848	84.2312	69.8058	55.9422	38.6014	28.171	18.2968	15.2841		89.9337	81.2748	68.3359	52.0386	37.3853	25.962	16.933	13.4674		90.3677	77.0769	51.9225	35.0266	26.12	21.5548	18.6894	15.9205			14.7878	91.7657	1.05624	4	81.4102	1.56706	4	65.0565	4.39579	4	49.3316	4.83505
	14.8694	95.5255	83.5913	69.6383	54.1554	26.0825	16.7824	13.2662		91.5214	84.1985	68.9551	55.8247	38.3954	27.8821	18.3724	15.4575		88.8412	82.4827	68.8837	52.0721	37.2995	25.8905	16.9231	13.6321		89.8215	76.8579	52.1778	34.5856	25.9878	21.7713	18.2872	15.6834			14.8694	91.4274	1.47397	4	81.7826	1.67954	4	64.9137	4.2487	4	49.1594	4.91823
	14.9511	95.1241	83.3283	68.6538	54.4414	26.253	16.7463	13.2558		91.4982	84.599	69.2645	55.7524	38.6461	27.6221	18.5021	15.8976		89.1924	82.2021	68.6142	51.8121	37.0421	25.9798	16.7841	13.338		89.3419	77.0039	51.8925	34.8289	26.4341	21.3203	18.2162	15.4165			14.9511	91.2891	1.3826	4	81.7834	1.66666	4	64.6062	4.24053	4	49.2087	4.86276
	15.0329	96.2409	83.4335	68.4897	54.1227	26.2104	16.7824	13.2765		91.6217	83.5445	69.1442	55.9512	38.3417	27.7088	18.4156	15.2841		88.9348	80.6125	67.9186	51.401	37.3767	25.3102	16.7841	13.3733		89.7149	76.6389	51.9225	34.6768	26.2357	21.7532	18.3818	15.3869			15.0329	91.6281	1.63788	4	81.0574	1.62153	4	64.3688	4.1563	4	49.0379	4.87745
	15.1147	94.9416	83.3809	68.8569	53.7959	25.9206	16.7012	12.9961		91.6217	84.8279	69.17	55.9422	38.2521	27.6702	18.5129	15.1107		89.6137	81.0099	67.6056	51.1493	37.1536	25.212	16.6849	13.785		91.3802	75.9089	51.8324	34.0532	25.591	21.7532	18.1453	15.4758			15.1147	91.8893	1.11152	4	81.2819	1.95626	4	64.3662	4.19159	4	48.7351	4.99115
	15.1965	96.7737	83.1555	68.3803	53.8858	25.7586	16.3676	13.1415		92.1077	84.2394	68.4826	55.5807	38.1895	27.6799	18.3832	15.2574		88.8334	80.7917	67.8925	51.8289	37.1965	25.2477	16.9132	13.4557		92.4727	76.2009	51.2016	34.3422	26.0043	21.2662	18.1926	15.298			15.1965	92.5469	1.62928	4	81.0969	1.78365	4	63.9892	4.26451	4	48.9094	4.91593
	15.2782	93.7226	83.3358	68.8335	54.0329	25.7671	16.5569	13.1623		91.8454	84.0023	68.7661	55.3005	38.7804	27.6317	18.1563	14.964		88.5057	81.9762	67.8404	51.4178	36.8791	25.0781	16.7543	13.6321		92.2995	76.1133	51.532	34.2205	25.4588	21.14	18.1216	15.6241			15.2782	91.5933	1.10415	4	81.3569	1.79799	4	64.243	4.24305	4	48.7429	4.90782
	15.3601	95.1752	83.3058	67.9662	53.4853	25.6904	16.2323	13.1934		91.6371	84.1413	68.9895	55.0474	38.5297	27.6799	18.2427	14.7373		89.0753	81.0255	67.4144	51.5688	36.596	24.9085	16.7841	13.1616		89.4484	77.1061	51.562	33.962	25.8555	21.2302	18.2635	15.1497			15.3601	91.334	1.39951	4	81.3947	1.57384	4	63.983	4.15317	4	48.5159	4.90317
	15.4416	94.6131	82.9301	68.271	53.0604	25.2983	16.7373	13.0999		91.9457	84.2067	69.3246	55.7433	37.9208	27.2368	18.1563	14.9773		88.8724	80.9242	67.3274	51.3842	36.7848	25.0692	16.4169	13.1498		91.207	76.4783	51.3067	33.9772	25.839	21.2121	17.9323	15.3572			15.4416	91.6596	1.18246	4	81.1348	1.69279	4	64.0574	4.26977	4	48.5413	4.93699
	15.5233	94.0657	83.0503	68.1538	53.0931	25.4177	16.5299	13.1311		93.2264	84.2394	69.1786	54.8848	37.5448	27.0538	17.9942	15.1907		89.4108	81.2437	66.997	50.8557	36.2186	25.0513	16.8834	13.3968		91.6334	75.9527	50.9162	33.9316	25.7563	21.5729	18.027	15.0904			15.5233	92.0841	1.02392	4	81.1215	1.82968	4	63.8114	4.32143	4	48.1913	4.82415
	15.6052	95.8832	82.6221	67.8803	53.8204	25.2472	16.2774	13.1311		91.9457	83.6508	68.1474	54.6859	37.8223	26.7745	18.34	14.964		89.5435	80.3242	67.623	51.2164	36.3044	24.8549	16.5459	13.0087		90.8074	75.6023	50.6458	34.0989	25.4092	21.1941	18.0979	15.4462			15.6052	92.0449	1.37025	4	80.5498	1.78977	4	63.5742	4.31077	4	48.4554	4.84197
	15.6869	95.8102	82.9001	67.7944	53.2974	25.2728	16.4578	13.2765		91.0971	83.5282	69.1614	54.6136	37.688	26.842	18.2319	14.8706		88.7944	79.9268	67.4752	50.6208	36.1843	24.9621	16.665	13.1028		90.5675	76.4637	50.5707	33.4449	25.6737	21.4827	18.1453	15.1794			15.6869	91.5673	1.49756	4	80.7047	1.61717	4	63.7504	4.40842	4	47.9942	4.92039
	15.7686	95.3212	83.8918	68.1303	53.2974	25.0852	16.3495	12.9753		91.9225	83.8388	68.3537	55.0836	37.2403	26.8805	17.8104	14.6039		87.4132	80.745	66.7971	50.8725	35.9784	24.6049	16.6055	13.1616		91.8865	76.5513	50.4205	33.8555	25.4092	21.176	18.5001	15.0311			15.7686	91.6358	1.62166	4	81.2567	1.73238	4	63.4254	4.34855	4	48.2772	4.88407
	15.8505	94.8905	82.5394	68.0756	53.2565	25.2642	16.1962	12.9233		91.3362	84.1576	68.474	54.4781	37.2493	26.736	18.0158	14.5772		89.3016	80.4956	66.8319	50.7634	36.0213	24.5692	16.5161	12.8793		90.5542	76.0403	50.9462	34.1901	25.7067	21.1039	18.1689	15.0015			15.8505	91.5206	1.19889	4	80.8082	1.75704	4	63.5819	4.22639	4	48.172	4.7243
	15.932	95.0365	82.84	67.9897	53.2974	24.9148	16.2233	12.8091		92.0074	83.4382	68.8434	54.5775	37.4463	27.1309	17.6699	15.044		88.8568	80.7917	66.6058	50.7383	35.8669	24.2657	16.4665	12.9617		90.008	76.8141	50.6158	33.6882	25.6902	21.176	18.0743	15.0904			15.932	91.4772	1.35323	4	80.971	1.497	4	63.5137	4.32394	4	48.0753	4.86166
	16.0137	95.3796	83.4936	68.4038	52.7662	24.9403	15.9708	12.9753		91.7682	83.4628	67.6405	53.8093	37.3836	26.9383	18.005	14.924		89.2158	79.9735	66.9797	50.8054	35.6009	24.5603	16.7444	12.8558		91.9265	76.0111	50.3304	33.673	25.4257	20.8333	18.1453	14.9125			16.0137	92.0725	1.26529	4	80.7352	1.77824	4	63.3386	4.3458	4	47.7635	4.73791
	16.0954	95.1241	82.7423	67.9428	52.6436	24.6761	16.0069	12.861		91.9303	84.5418	68.6372	54.5865	37.3388	26.5723	18.113	14.7373		88.8412	80.6904	66.5449	50.646	35.7982	24.4442	16.7345	12.7735		91.3003	77.0331	50.6308	33.2319	25.0785	21.0678	17.6485	15.0015			16.0954	91.799	1.29328	4	81.2519	1.61137	4	63.4389	4.29149	4	47.777	4.91463
	16.1772	93.9051	82.4418	67.4584	52.1696	24.821	16.088	12.8714		91.8994	83.6835	68.2248	54.0895	37.1956	26.7745	17.9509	14.7506		88.1623	80.4333	66.7797	50.2265	35.6696	24.2746	16.3573	13.1028		92.5127	75.9965	49.7897	33.4449	25.3761	21.3023	17.5538	14.8532			16.1772	91.6199	1.22652	4	80.6388	1.68607	4	63.0632	4.43431	4	47.4826	4.74523
	16.2589	94.4891	81.8933	68.1538	52.0634	25.3324	15.8716	12.6636		91.2128	83.5118	68.663	54.0262	36.909	26.4663	17.7348	14.5639		88.9583	81.4852	66.6145	50.3356	35.7553	24.2925	16.1092	12.7029		92.2728	76.3469	50.1352	33.5361	25.31	20.7612	17.8614	15.0608			16.2589	91.7332	1.14953	4	80.8093	1.5505	4	63.3916	4.44021	4	47.4903	4.7121
	16.3406	94.927	82.4793	67.6068	53.5262	24.6931	15.7904	12.9026		91.4134	84.2884	68.01	54.2521	37.115	26.5241	17.8537	14.6839		88.7788	80.745	66.971	49.8909	35.4808	24.1407	16.1191	12.597		91.7	74.8868	50.015	33.2776	24.6652	20.6169	17.6721	14.4678			16.3406	91.7048	1.25927	4	80.5999	2.0371	4	63.1507	4.38378	4	47.7367	4.91322
	16.4221	94.8248	81.6529	67.9272	52.2269	24.821	16.1241	12.8506		91.6525	83.2747	68.2763	54.216	36.4882	26.6975	17.6699	14.6706		89.4421	80.4722	66.7101	49.4211	35.0519	24.5157	16.3176	12.9852		92.7924	75.2519	50.6008	33.4144	25.1116	20.9957	17.6485	14.8829			16.4221	92.178	1.12341	4	80.1629	1.73488	4	63.3786	4.27248	4	47.3196	4.73824
	16.5038	94.8175	83.148	67.6928	52.186	24.6591	15.8986	12.7363		92.2234	83.3238	68.01	53.4749	37.1597	26.553	17.7348	14.6706		88.0843	80.1216	66.6841	49.7232	35.0691	23.8639	16.2382	12.7264		92.9923	75.8213	49.8648	32.9582	24.8636	20.1479	17.6958	14.705			16.5038	92.0294	1.42309	4	80.6037	1.75538	4	63.0629	4.40843	4	47.0856	4.773
	16.5855	96.3431	82.3742	67.8569	52.0062	24.3266	15.9167	12.7363		90.3179	83.0949	67.6319	54.1618	36.4524	26.0715	17.7564	14.8306		88.4198	80.5735	66.0233	49.8826	35.232	24.48	16.2283	12.6441		89.555	75.6461	50.1652	33.1559	25.2604	20.8514	17.4355	14.5568			16.5855	91.1589	1.77149	4	80.4222	1.67799	4	62.9193	4.27093	4	47.3016	4.79546
	16.6672	93.2847	82.3817	67.6147	52.2105	24.7017	15.9167	12.8506		91.0893	83.5936	68.2248	53.746	36.6852	26.3508	17.9077	14.6039		88.6695	80.5346	66.0929	49.9832	35.1806	23.7211	16.4169	12.7264		89.9014	74.9014	50.1953	33.1255	24.9628	21.0137	17.6721	14.8829			16.6672	90.7362	0.982658	4	80.3528	1.92287	4	63.0319	4.30229	4	47.2663	4.77648
	16.749	93.7737	82.4042	67.3021	52.4393	24.6761	16.088	12.8298		91.3362	82.9968	68.1818	53.4207	35.8524	26.5145	17.8429	14.6706		88.8022	80.6748	66.1102	49.4715	34.9661	23.7925	16.0893	12.9264		91.8998	75.1497	50.1202	32.7452	24.9628	20.7071	17.4119	14.6754			16.749	91.453	1.02575	4	80.3064	1.78808	4	62.9286	4.29052	4	47.0192	4.83146
	16.8307	94.9051	82.2464	66.8333	52.1288	24.6676	15.8626	12.861		91.7914	82.8905	67.5889	53.746	36.7479	26.4182	17.6808	14.4038		88.7554	80.3397	65.6668	49.2198	35.0004	23.4086	16.1985	13.1263		89.3552	75.2957	50	32.8061	25.1942	20.7973	17.5538	14.5271			16.8307	91.2018	1.39813	4	80.1931	1.71995	4	62.5223	4.19277	4	46.9752	4.81496
	16.9125	94.5985	82.3366	67.3881	51.6957	24.4374	16.0159	12.4143		90.4104	83.6017	67.3483	53.1315	35.9599	26.0715	17.5294	14.4038		89.1299	80.2852	65.1452	49.5889	34.3742	23.8639	16.0099	12.5265		92.5793	74.989	49.7747	32.7757	24.8636	20.5447	17.2463	14.6754			16.9125	91.6795	1.20559	4	80.3031	1.89858	4	62.4141	4.24559	4	46.7979	4.73036
	16.9942	94.8978	82.4117	67.5287	51.8836	24.4033	15.9798	12.4143		91.5677	83.6998	67.5202	52.8423	36.0047	26.2737	17.5727	14.0838		88.2013	80.4488	65.2843	48.8758	34.8289	23.8372	15.9107	12.597		91.4868	75.3395	49.4443	32.7148	24.6652	20.653	17.0334	14.2307			16.9942	91.5384	1.36703	4	80.475	1.83768	4	62.4444	4.36541	4	46.5791	4.69804
	17.0758	95.4307	82.1788	66.2474	51.3606	24.446	15.9978	12.4766		91.9997	82.5636	67.1679	53.0411	36.1658	26.1292	17.6916	14.3372		89.5201	80.2696	65.5799	49.0185	34.4686	23.6765	16.2581	12.5735		88.7157	74.5656	49.0688	32.5171	24.8471	20.7612	17.5302	14.2899			17.0758	91.4165	1.50953	4	79.8944	1.84571	4	62.016	4.32799	4	46.4843	4.72824
	17.1575	95	82.3591	66.9662	51.7692	24.4204	15.3576	12.3208		91.3439	84.0268	67.1335	52.3633	35.6823	25.8307	17.2052	14.1905		89.0363	80.1917	66.2059	49.4715	34.9747	23.239	15.8114	12.6206		88.5025	74.4926	49.5344	32.5019	24.4834	20.4545	17.3172	14.2307			17.1575	90.9707	1.47785	4	80.2676	2.07891	4	62.46	4.31326	4	46.5265	4.71626
	17.2392	94.0438	81.9534	66.4427	51.426	24.3096	15.8355	12.4766		91.9534	83.52	66.3602	52.8965	35.8435	26.1004	17.2052	13.697		89.0285	80.1138	65.6495	49.3372	34.1597	23.48	16.0199	12.3383		89.0488	75.4563	49.3241	32.365	24.0866	20.5267	17.4828	14.5864			17.2392	91.0186	1.2202	4	80.2609	1.74624	4	61.9441	4.21043	4	46.5062	4.76994
	17.3208	95.6204	81.1721	65.7708	51.9081	24.0709	15.601	12.3416		91.1896	82.9559	66.9445	53.1586	35.4137	25.9559	17.5294	14.3505		87.9906	79.7241	65.5973	48.7919	34.4686	23.5693	15.7519	12.2089		89.5017	74.4926	49.4893	32.73	24.533	20.2381	16.9624	13.9045			17.3208	91.0756	1.64981	4	79.5862	1.82194	4	61.9505	4.16447	4	46.6472	4.72902
	17.4024	94.8029	83.0729	66.1692	51.9408	24.1391	15.7994	12.4766		91.83	84.0105	67.1593	52.291	35.7002	25.927	17.162	13.9904		88.256	80.6047	65.7451	49.1946	34.194	23.7836	15.8412	12.6441		89.8748	74.77	48.8886	32.1977	24.4834	20.2201	17.2226	14.3196			17.4024	91.1909	1.40834	4	80.6145	2.07633	4	61.9905	4.37737	4	46.4061	4.78643
	17.4841	95.073	82.5319	66.1536	50.9193	24.105	15.6912	12.3624		90.9273	82.8742	66.7469	52.4446	35.5838	25.7151	17.2917	14.2038		88.6071	79.2644	65.3104	48.9262	34.2112	23.5693	15.603	12.35		89.7282	75.2957	48.9787	32.5475	24.4834	20.2561	16.9151	14.0824			17.4841	91.0839	1.41155	4	79.9915	1.76407	4	61.7974	4.28305	4	46.2094	4.61058
	17.5658	94.5036	81.6679	65.9192	50.7722	23.5851	15.6552	12.3312		90.7422	82.7843	67.4085	52.8604	35.3868	26.004	17.7132	13.8437		88.8724	79.428	65.493	48.3305	34.0311	23.3015	15.5434	12.4559		89.3952	74.478	48.483	31.9848	24.3181	20.5808	17.3646	14.1714			17.5658	90.8783	1.27099	4	79.5896	1.84119	4	61.8259	4.46654	4	45.987	4.75829
	17.6474	94.0876	81.3674	66.3177	50.5516	24.2329	15.7724	12.3831		91.4211	82.8824	66.996	52.5892	35.0376	26.2063	17.2593	14.1104		89.5357	79.3891	64.7105	49.0352	33.9367	23.2033	15.9107	12.7735		89.142	74.6532	48.7834	31.924	24.5495	20.1659	17.1753	13.9045			17.6474	91.0466	1.12909	4	79.573	1.78908	4	61.7019	4.33275	4	46.025	4.75641
	17.7292	94.781	82.1488	66.4739	50.903	23.9516	15.556	12.4351		91.4597	83.4873	67.3913	52.1012	34.8764	25.4069	17.3133	14.0037		88.7007	80.0358	65.0148	48.5654	33.808	23.1854	16.0397	12.6206		91.207	74.4342	48.4229	31.9392	24.533	20.2561	17.057	13.9045			17.7292	91.5371	1.24776	4	80.0265	1.99488	4	61.8257	4.49431	4	45.8772	4.70366
	17.8109	94.6204	82.2164	65.7161	50.3637	23.9345	15.583	12.3		90.5262	82.8578	66.6609	51.803	35.3062	25.4647	17.1728	13.9637		89.5279	79.5605	65.4147	47.7181	34.3399	23.3818	15.7122	12.2442		89.7549	73.967	48.6182	31.8631	24.4669	20.1479	16.8441	14.0528			17.8109	91.1073	1.19036	4	79.6504	2.02446	4	61.6025	4.33623	4	45.437	4.603
	17.8926	95.2044	81.1044	65.3254	50.6824	23.5851	15.4027	12.4143		90.9659	82.5799	66.8929	51.9205	35.1003	25.4069	17.4538	14.0437		88.5993	79.5605	64.6409	48.4983	33.8938	22.8105	15.4144	12.3383		88.8223	74.2882	48.5882	32.0913	24.4173	20.3644	16.8678	13.8156			17.8926	90.898	1.5314	4	79.3833	1.80674	4	61.3619	4.28391	4	45.7981	4.62339
	17.9742	95.9854	81.3899	66.138	50.2656	23.6533	15.4658	12.2896		90.8425	82.7107	66.2743	52.0651	35.2704	25.3106	16.9459	13.9771		88.6383	79.9345	64.7018	48.406	33.7308	23.2836	15.8511	12.2089		90.048	74.3174	48.6182	32.2738	24.4669	20.1659	16.8441	14.2603			17.9742	91.3785	1.60182	4	79.5881	1.84611	4	61.4331	4.2864	4	45.7526	4.55462
	18.0558	93.2701	81.4275	65.4895	50.0123	23.6021	15.2854	11.9884		90.611	83.0459	66.1712	51.4686	34.8227	24.9831	17.2917	14.0838		88.5759	80.0047	65.0409	48.2215	33.6879	23.114	15.6725	12.1383		90.0346	73.2808	48.2878	31.924	24.3181	20.1659	16.8441	13.9638			18.0558	90.6229	0.980814	4	79.4397	2.1449	4	61.2473	4.32609	4	45.4066	4.54299
	18.1375	94.6204	81.6604	65.763	50.4045	23.389	15.5199	12.3		91.0508	82.8905	66.2571	52.2097	35.1092	25.0602	17.1296	14.0037		88.5915	78.7735	63.9715	47.8188	33.4649	23.3729	15.5931	12.1383		92.0997	73.748	47.8522	32.1521	23.9378	20.5808	16.7495	13.9935			18.1375	91.5906	1.24917	4	79.2681	2.03227	4	60.9609	4.39707	4	45.6463	4.58741
	18.2192	95.7956	82.1638	65.8567	50.5843	23.6021	15.1051	12.2065		90.7499	82.9886	66.3172	52.1283	35.2077	25.6284	17.1188	13.897		87.8892	79.1865	65.0583	47.8691	33.4649	22.7301	15.6427	12.6441		90.5675	74.0692	48.483	31.8783	24.1858	20.2201	17.057	13.8749			18.2192	91.2506	1.65009	4	79.602	2.01694	4	61.4288	4.32309	4	45.615	4.66275
	18.3011	94.1606	81.2622	66.7787	50.5271	23.3294	15.4838	12.1026		90.6419	82.8987	66.1282	51.6042	35.0913	25.1854	17.1404	13.7503		89.0363	78.9683	64.2932	48.4983	33.4649	22.8551	15.5533	12.4912		89.3152	74.5948	48.453	31.0722	24.2519	20.0938	16.4892	14.0231			18.3011	90.7885	1.17733	4	79.431	1.80234	4	61.4133	4.35202	4	45.4255	4.82753
	18.383	93.9927	81.6078	65.1692	49.5628	23.6106	15.3125	12.113		90.6419	82.8251	66.4118	51.7849	34.5989	25.118	16.8918	13.5503		88.6539	79.6774	64.1193	47.4497	33.4906	22.7212	15.7122	12.0325		90.8473	74.5364	47.5969	31.5285	23.8717	19.733	16.6785	13.9342			18.383	91.034	1.1033	4	79.6617	1.82719	4	60.8243	4.43395	4	45.0815	4.60352
	18.4646	95.4672	82.6371	65.7239	50.2983	23.1248	15.5109	12.2065		90.6342	82.8333	65.9735	51.6945	35.0645	25.4069	17.0107	14.0037		88.9583	79.4514	64.4323	47.7433	33.3276	22.989	15.4342	12.2207		90.381	73.894	48.3178	32.1977	23.6733	20.0758	16.8678	13.9045			18.4646	91.3601	1.41781	4	79.704	2.08598	4	61.1119	4.27804	4	45.4835	4.50349
	18.5462	95.8467	81.7806	65.6848	49.9796	23.6618	15.4027	12.2585		91.3285	82.3837	65.9907	50.8269	34.7511	25.1565	17.0431	13.9637		88.4588	80.5112	64.5279	47.693	33.3105	23.0426	15.5434	11.9384		88.3027	74.5948	47.9874	31.635	24.1858	19.9856	16.3	13.6377			18.5462	90.9842	1.76377	4	79.8176	1.78412	4	61.0477	4.36482	4	45.0336	4.51498
	18.628	92.6277	80.9767	65.7708	49.8325	23.7044	15.1952	12.1546		91.2668	83.2666	65.9649	51.1252	34.8406	25.301	16.7621	13.737		88.1233	79.5683	63.8498	47.2735	33.1217	22.6855	15.2655	11.9501		89.2486	74.5656	47.5969	31.5589	24.0701	20.0397	16.5129	13.4895			18.628	90.3166	1.00811	4	79.5943	1.8413	4	60.7956	4.42539	4	44.9475	4.53404
	18.7098	93.6496	81.5702	65.8411	49.6609	23.6277	15.2584	11.9884		91.5059	82.5717	65.3806	51.2155	34.9391	25.012	17.2268	13.6436		88.1623	79.4125	63.502	47.5671	33.0102	22.7748	15.4342	12.4206		89.9414	73.967	48.1226	31.346	23.8717	20.0758	16.4892	13.3709			18.7098	90.8148	1.16592	4	79.3804	1.92107	4	60.7116	4.22672	4	44.9474	4.59499
	18.7917	94.1387	81.7731	65.0441	50.0531	23.1674	15.1592	12.113		90.3256	82.4001	65.9993	51.2698	34.0079	25.1565	17.1512	13.577		88.2091	79.7943	63.9454	47.6174	33.1989	22.6587	15.4243	12.0442		89.222	73.1348	46.906	31.1483	23.7064	19.8954	16.5839	13.5784			18.7917	90.4738	1.2958	4	79.2756	2.1209	4	60.4737	4.542	4	45.0222	4.68653
	18.8734	94.0438	81.4125	65.3254	49.7099	23.2356	15.06	12.2065		91.0971	82.4082	65.6384	51.2246	34.2407	25.012	16.9567	13.6303		88.0609	79.1008	63.6933	47.349	32.8472	22.6855	15.4541	11.7267		88.729	74.2298	47.8672	31.5894	24.1858	19.6248	16.5129	13.4302			18.8734	90.4827	1.35399	4	79.2878	1.82276	4	60.6311	4.27593	4	44.9682	4.53034
	18.9551	94.3723	81.5928	65.9348	49.906	23.3805	15.087	12.1857		91.5368	82.6617	65.4236	51.2336	34.384	24.752	16.9134	13.5103		87.46	79.9501	64.554	47.4581	32.9673	22.6765	15.3548	11.9737		90.9672	73.9086	47.5518	31.2395	23.8552	19.7872	16.4656	13.697			18.9551	91.0841	1.41906	4	79.5283	1.95446	4	60.8661	4.44722	4	44.9593	4.63962
	19.0369	93.6423	81.5778	64.4582	49.2931	23.1248	15.3305	12.0715		91.2514	81.9668	65.3377	51.3601	34.375	24.9254	16.827	13.577		88.2325	79.3189	63.5281	47.5923	33.1132	22.8015	15.3945	11.8207		89.1154	74.4342	47.5969	31.4068	24.0536	19.7511	16.3236	13.4895			19.0369	90.5604	1.20702	4	79.3244	1.73142	4	60.2302	4.22728	4	44.9131	4.56751
	19.1186	93.0657	81.5853	64.8723	49.097	23.014	15.1321	11.8325		90.3333	82.0894	65.1658	50.9625	34.0258	24.5305	16.9891	13.3502		88.2481	79.3969	63.7715	47.2315	32.7957	22.8015	15.206	11.8207		89.1021	72.9596	46.906	30.8745	24.0701	19.6248	16.2763	13.3116			19.1186	90.1873	1.05058	4	79.0078	2.09905	4	60.1789	4.43447	4	44.5414	4.61884
	19.2004	95.2117	81.6754	64.6379	49.6936	22.9799	15.06	11.8533		90.9196	81.8851	65.6642	50.7275	33.5691	24.752	16.6649	13.1635		88.256	80.0047	63.615	46.5185	32.9244	22.6408	15.5931	11.8913		88.2894	73.018	47.5518	31.0266	23.508	19.4986	16.3709	13.5191			19.2004	90.6692	1.63769	4	79.1458	2.08548	4	60.3672	4.29223	4	44.4915	4.57676
	19.2821	93.3212	81.2547	64.2785	49.4321	22.9884	15.2584	11.7806		89.3226	82.2202	65.2432	50.4022	33.5333	24.7424	16.6108	13.4036		87.9984	79.2021	63.4498	46.896	32.3754	22.373	15.2655	11.6914		89.6483	73.2662	46.8459	31.0722	23.3096	19.8773	16.3236	13.5488			19.2821	90.0726	1.1401	4	78.9858	2.0077	4	59.9543	4.38482	4	44.4506	4.52029
	19.3637	93.7226	80.6386	64.7238	49.1297	23.1504	14.8165	11.7598		91.5137	81.5254	65.226	50.2305	33.587	24.5305	16.6216	12.9901		87.9594	79.2254	63.3542	46.6946	32.4097	22.5783	15.0868	11.6678		88.9155	73.456	47.0412	30.7985	23.475	19.697	16.3236	13.1634			19.3637	90.5278	1.30304	4	78.7114	1.81467	4	60.0863	4.36633	4	44.2133	4.53221
	19.4453	93.3285	81.991	65.0129	48.8518	22.5707	14.9968	11.9053		90.6882	83.6099	65.0455	50.4202	33.6945	24.6268	16.5352	13.4036		89.3562	78.8358	63.1108	46.4849	32.2639	22.2659	15.1365	11.6443		91.7133	73.2516	46.8459	30.8897	23.4419	19.6789	16.5366	13.193			19.4453	91.2715	0.838396	4	79.4221	2.2832	4	60.0038	4.40921	4	44.1617	4.49731
	19.527	93.7226	81.6153	64.9035	48.5495	22.835	15.3035	11.8221		90.2098	82.4328	65.3377	49.9774	33.8825	24.8676	16.5136	13.2169		88.2716	79.2332	63.4846	46.3674	32.4183	22.0873	15.067	11.6914		89.2353	73.1348	47.4317	31.2395	23.6568	19.5527	16.3	13.2523			19.527	90.3598	1.18871	4	79.104	2.1023	4	60.2894	4.30413	4	44.0335	4.32875
	19.6087	92.9635	82.0361	64.8723	49.2768	22.7412	15.0329	11.8118		91.0508	82.0649	64.4269	50.0949	33.6229	24.4053	16.6649	13.2969		88.2325	78.5709	63.2412	46.6275	32.221	22.2212	15.0769	11.7384		88.4226	73.018	47.1463	30.5551	23.4915	19.7511	15.9688	13.1634			19.6087	90.1673	1.13235	4	78.9224	2.13222	4	59.9217	4.27234	4	44.1386	4.58788
	19.6906	95.2701	81.3373	64.5597	48.623	22.656	15.078	11.7079		90.7499	82.1548	65.5697	50.4745	33.5423	24.4823	16.5136	13.4569		88.2013	78.68	62.8065	46.3674	32.2639	22.1587	15.0968	11.5502		88.4359	73.164	46.8309	31.057	23.5245	19.5707	16.3946	13.2523			19.6906	90.6643	1.63942	4	78.834	2.03034	4	59.9417	4.40739	4	44.1305	4.43798
	19.7723	94.6131	80.9767	64.7551	47.9774	22.6048	15.1501	11.7287		90.2793	82.3592	64.53	49.9684	33.7124	24.5979	16.8054	13.0301		88.4432	78.5241	63.9454	46.1745	32.2038	22.6587	15.2258	11.7384		88.6224	72.3171	46.9811	30.6616	23.5411	19.1739	16.158	13.1337			19.7723	90.4895	1.43532	4	78.5443	2.22201	4	60.0529	4.36061	4	43.6955	4.41316
	19.8541	93.3431	81.2923	64.1925	48.9417	22.8179	14.9247	11.8014		90.0093	81.6725	65.1658	49.8418	33.4259	24.5016	16.5244	13.3102		88.2091	79.0852	62.9456	46.4597	32.2038	22.4355	15.1365	11.6561		88.0496	72.6091	46.8759	30.7072	23.5245	19.3903	15.9215	13.2227			19.8541	89.9028	1.22983	4	78.6648	2.09757	4	59.795	4.33025	4	43.9876	4.48419
	19.9358	94.2263	80.7213	64.3957	48.7783	22.7156	14.7534	11.4482		90.125	81.6807	64.719	49.8147	33.014	24.2512	16.5136	13.4169		88.5993	78.2903	62.6239	46.1409	32.3926	22.1677	15.335	11.4797		91.4069	73.5144	46.5455	30.8441	23.5741	19.1919	16.1817	13.0151			19.9358	91.0894	1.19274	4	78.5517	1.82438	4	59.571	4.36619	4	43.8945	4.41833
	20.0177	93.4891	81.2472	64.716	49.0153	22.4429	14.8526	11.7702		90.4567	81.3864	64.7792	49.5798	33.3721	24.3571	16.4487	13.0835		88.6695	78.267	63.1282	46.2752	32.3411	22.1944	14.9975	11.5737		90.9939	73.3246	46.5605	30.5703	23.4088	19.2641	16.229	12.7483			20.0177	90.9023	0.995132	4	78.5563	1.88647	4	59.796	4.42831	4	43.8601	4.48832
	20.0993	95.146	80.278	64.1378	48.6557	22.298	14.7534	11.5832		89.9398	82.7761	64.7104	49.7063	33.0498	24.1549	16.5784	13.1368		88.6851	78.7579	63.6759	45.7634	32.0065	22.3551	15.1067	11.6678		90.5942	72.8135	46.7858	30.2814	23.3758	19.2821	15.9451	13.3116			20.0993	91.0913	1.4084	4	78.6564	2.11642	4	59.8275	4.35237	4	43.6017	4.51768
	20.1809	93.708	81.4801	64.5441	48.2962	22.6219	14.7894	11.3962		90.0555	81.648	64.7448	49.6521	33.1035	24.4631	16.4487	13.0035		88.5057	79.2488	62.4761	45.9312	31.5862	21.9266	14.9082	11.5149		87.5833	72.2879	46.17	30.1597	23.3096	19.4264	15.9451	13.1634			20.1809	89.9631	1.34848	4	78.6662	2.19528	4	59.4838	4.46743	4	43.5098	4.51594
	20.2626	93.8467	80.3757	63.7394	48.386	22.1701	14.7263	11.7806		90.341	81.3455	64.2121	49.7515	33.0498	24.1741	16.3298	13.4302		87.8034	78.2981	63.3977	46.0403	31.8264	22.2659	15.0174	11.3856		89.2619	73.1786	46.4103	30.4943	23.26	19.4264	15.8978	13.0151			20.2626	90.3132	1.28747	4	78.2995	1.82146	4	59.4399	4.34638	4	43.668	4.4576
	20.3443	94.1752	80.8039	64.1847	48.3779	22.1531	15.0329	11.604		90.2638	81.1902	64.0144	49.7605	33.0498	24.0875	16.0164	13.1102		87.3352	78.5865	62.2587	46.1326	31.6548	22.248	15.0968	11.4444		90.2345	72.6675	46.7107	30.2662	23.2104	19.2641	15.8978	12.7779			20.3443	90.5022	1.40385	4	78.312	1.967	4	59.2921	4.21634	4	43.6343	4.5183
	20.426	81.292	3.12547	1.40636	2.22277	3.95499	5.56407	5.83835		90.5956	81.7461	64.2894	49.3538	32.9334	24.1067	16.2326	13.5236		88.7476	78.7111	62.3805	45.6628	31.8693	22.3105	14.8784	11.362		89.7016	24.9525	19.5855	9.29278	8.01785	6.99856	6.15093	5.42544			20.426	87.5842	2.13107	4	47.1338	19.6297	4	36.9154	15.703	4	26.633	12.1618
	20.5077	84.5109	2.08866	0.992265	1.34837	2.78725	4.60817	5.19427		91.2822	81.8769	64.5901	49.8238	33.1035	24.1934	16.2866	12.9234		88.0687	78.1111	61.9371	45.7383	31.5347	21.6766	14.938	11.5267		87.943	25.0548	19.5254	9.36882	7.80294	6.89033	5.79607	5.18826			20.5077	87.9512	1.38278	4	46.7829	19.7542	4	36.7612	15.7712	4	26.5698	12.3834
	20.5893	82.5109	1.57025	0.796937	0.996976	2.01159	3.81459	4.49823		89.8935	82.3347	64.2035	49.6521	32.9602	23.9045	16.4703	13.1768		88.1467	79.3423	62.1544	45.5789	31.2001	21.8909	14.8983	11.4091		88.6224	24.8649	20.0511	9.44487	7.90213	6.81818	5.67779	4.92143			20.5893	87.2934	1.63623	4	47.028	20.1005	4	36.8015	15.7336	4	26.4182	12.3871
	20.6711	81.5985	1.30729	0.632862	0.743646	1.60245	3.07512	3.9892		90.5184	81.6644	64.4011	49.5798	32.5573	24.0778	16.1353	13.1902		88.1545	78.4306	61.7719	45.906	31.6805	21.632	14.8983	11.3267		88.0229	25.3614	20.1111	9.35361	7.83601	6.76407	5.44121	4.47673			20.6711	87.0736	1.91296	4	46.6909	19.8854	4	36.7292	15.7374	4	26.3958	12.472
	20.7527	82.0365	1.11946	0.523478	0.645583	1.26151	2.5611	3.55288		91.1202	80.806	64.6675	49.2725	32.5125	23.8563	16.2974	13.1502		87.7097	78.2826	62.0501	45.5034	31.0114	21.882	15.0372	11.3267		88.0895	25.23	20.3515	9.65779	7.90213	6.81818	5.60681	4.59532			20.7527	87.239	1.89461	4	46.3595	19.788	4	36.8981	15.8131	4	26.2698	12.3545
	22.0785	83.0073	0.999249	0.468787	0.596551	1.08251	2.32663	3.18928		96.7058	2.30524	0.996735	1.56349	2.73997	3.73688	6.54923	7.44198		90.1834	2.40006	0.947661	2.11409	3.08827	4.21391	6.68983	7.01012		87.8231	25.2738	20.742	9.68821	8.03439	6.78211	5.46487	4.29884			22.0785	89.4299	2.84806	4	7.74458	5.85179	4	5.78879	4.98581	4	3.49059	2.08955
	22.16	82	0.901578	0.406282	0.555692	1.0058	2.09216	2.8984		97.3075	2.06	0.867847	1.27429	2.149	2.97602	5.56576	6.57509		88.9973	1.95589	0.765084	1.45134	1.91301	2.86582	5.33002	6.44554		89.9147	25.4198	20.4566	9.52091	7.90213	6.87229	5.32292	4.2099			22.16	89.5549	3.13076	4	7.58431	5.95091	4	5.62395	4.9452	4	3.20056	2.11567
	22.2419	84.0292	0.848986	0.343777	0.416769	0.809751	1.76752	2.70102		96.8446	1.76572	0.747551	1.02124	1.76397	2.44631	4.74441	6.06828		89.8166	1.61303	0.634672	1.07383	1.3983	2.09803	4.4268	5.44578		87.9297	25.3468	20.4716	9.26236	7.73682	6.89033	5.3939	4.23955			22.2419	89.655	2.6824	4	7.39363	5.98774	4	5.5494	4.9748	4	2.94355	2.11154
	22.3235	82.1898	0.81142	0.335964	0.375909	0.843846	1.7585	2.43092		97.4772	1.68397	0.721774	0.813376	1.56698	2.08032	4.08516	5.61483		89.286	1.39484	0.617284	0.855705	1.18384	1.66057	3.69231	4.91649		88.9555	25.0986	20.5918	9.44487	7.91866	6.80014	5.18098	4.00237			22.3235	89.4771	3.12804	4	7.2472	5.95322	4	5.5667	5.00902	4	2.87246	2.19348
	22.4052	81.7153	0.81142	0.304711	0.359565	0.673372	1.53305	2.27509		97.8938	1.545	0.5757	0.68685	1.34312	1.89733	3.51237	5.14804		90.5189	1.4416	0.521648	0.755034	1.00369	1.40166	3.13648	4.52835		89.8082	25.376	20.3364	9.5057	7.98479	6.78211	5.32292	3.88378			22.4052	89.9841	3.30723	4	7.2935	6.02967	4	5.43462	4.96762	4	2.82679	2.22798
	22.487	83.1168	0.751315	0.296898	0.318706	0.579611	1.37073	2.04654		97.593	1.43056	0.5757	0.61455	1.11032	1.72397	3.26381	4.56122		89.9727	1.32471	0.486872	0.629195	0.754911	1.23203	2.74938	4.03434		90.3011	25.1278	20.4866	9.53612	7.81947	6.78211	5.22829	3.85414			22.487	90.2459	2.95637	4	7.15859	5.99158	4	5.46152	5.00871	4	2.77464	2.25496
	22.5688	82.0584	0.728775	0.234393	0.286018	0.528469	1.35269	2.04654		96.7906	1.38968	0.47259	0.533213	0.94914	1.66619	2.88555	4.22779		90.277	1.19224	0.434707	0.520134	0.669126	1.05348	2.45161	3.6462		89.9947	25.2154	20.802	9.41445	7.78641	6.74603	5.18098	3.7059			22.5688	89.7802	3.01476	4	7.13151	6.02954	4	5.48593	5.10564	4	2.68845	2.24272
	22.6504	83.8175	0.706236	0.25002	0.326878	0.511422	1.19939	1.9011		97.4387	1.32429	0.47259	0.5061	0.787966	1.37725	2.60456	3.73433		90.0897	1.20782	0.391236	0.478188	0.557605	0.892777	2.26303	3.24629		89.142	25.1424	20.757	9.55133	7.8856	6.74603	5.22829	3.58731			22.6504	90.122	2.8024	4	7.09518	6.01722	4	5.46771	5.09663	4	2.71562	2.27891
	22.7322	82.8248	0.676183	0.25002	0.261502	0.443232	1.11823	1.79722		95.9188	1.32429	0.43822	0.460913	0.716332	1.22315	2.34519	3.72099		89.1221	1.12211	0.382542	0.369128	0.488977	0.776716	1.88586	3.09339		89.3152	25.4344	20.5918	9.53612	7.80294	6.87229	5.13366	3.7059			22.7322	89.2952	2.67346	4	7.13924	6.09988	4	5.41564	5.05886	4	2.65692	2.29343
	22.8139	81.6642	0.653644	0.203141	0.228814	0.434708	1.06412	1.69333		96.7752	1.32429	0.421035	0.442838	0.68947	1.0209	2.13985	3.44092		88.9661	1.25458	0.35646	0.419463	0.420348	0.732077	1.81638	2.78758		89.0621	25.011	20.2013	9.41445	7.80294	6.87229	5.58316	3.52802			22.8139	89.1169	3.08515	4	7.06086	5.98525	4	5.29547	4.96881	4	2.62639	2.26319
	22.8956	81.5255	0.676183	0.187515	0.21247	0.400614	0.973938	1.64139		95.9034	1.27524	0.386664	0.3615	0.599928	0.905326	1.9237	3.18752		88.9973	1.09873	0.330377	0.318792	0.386034	0.571378	1.61787	2.68172		88.5159	24.8357	20.6819	9.32319	7.80294	6.90837	5.29927	3.67625			22.8956	88.7355	2.93654	4	6.97147	5.95608	4	5.39661	5.09527	4	2.55399	2.25662
	22.9772	82.7591	0.638618	0.203141	0.196127	0.409137	0.865723	1.50634		95.4637	1.38968	0.369479	0.343425	0.492479	0.789752	1.81563	3.04081		88.927	1.12211	0.286907	0.318792	0.360299	0.535666	1.62779	2.50529		89.2353	25.3176	20.5617	9.49049	7.76988	6.80014	5.08635	3.64661			22.9772	89.0963	2.59408	4	7.11699	6.06885	4	5.35531	5.06892	4	2.58721	2.30132
	23.0588	82.2263	0.608565	0.210954	0.179783	0.3239	0.883759	1.46478		95.3402	1.22619	0.360887	0.32535	0.447708	0.731966	1.69675	2.81408		90.1053	1.14548	0.347766	0.276846	0.343141	0.517811	1.37965	2.29358		88.0096	25.3176	20.9673	9.1711	8.10051	6.65584	5.22829	3.61696			23.0588	88.9204	2.712	4	7.07445	6.08258	4	5.47172	5.16529	4	2.48827	2.22782
	23.1405	83.7518	0.646131	0.22658	0.163439	0.272758	0.802597	1.40245		95.2554	1.25072	0.352294	0.271125	0.438754	0.674179	1.6211	2.62737		89.7386	1.1299	0.304295	0.260067	0.300249	0.437461	1.2804	2.1642		87.4634	25.0986	20.6819	9.53612	7.91866	6.70996	5.29927	3.40943			23.1405	89.0523	2.40778	4	7.03132	6.02382	4	5.39126	5.09694	4	2.55769	2.32627
	23.2222	81.8613	0.608565	0.203141	0.163439	0.298329	0.757507	1.34012		95.0239	1.11992	0.352294	0.262088	0.393983	0.626023	1.53464	2.41398		89.2938	1.02081	0.295601	0.260067	0.317406	0.428533	1.20099	2.01129		88.4626	24.8649	20.5918	9.44487	7.83601	6.80014	5.3939	3.67625			23.2222	88.6604	2.69509	4	6.90356	5.98815	4	5.3607	5.07712	4	2.53262	2.3042
	23.3037	81.1314	0.608565	0.195328	0.155267	0.264235	0.793579	1.25701		95.9188	1.13627	0.326517	0.271125	0.402937	0.616392	1.41576	2.40064		89.364	1.05977	0.321683	0.276846	0.283092	0.392822	1.19107	1.95248		88.7956	25.2446	21.2376	9.23194	8.06745	6.94444	5.22829	3.43908			23.3037	88.8025	3.02495	4	7.01229	6.07854	4	5.52028	5.2392	4	2.48379	2.24956
initial velocity		0.968073	7.22035	5.24488	9.65426	21.0266	41.5109	64.1414		2.36121	2.88555	6.8551	6.49092	12.8256	23.3262	39.2732	62.725		7.05343	5.85106	1.89813	9.97947	14.0554	21.6409	43.9673	64.9175		-1.22326	4.64743	7.93727	17.5335	28.5703	42.1403	66.0825	79.8496
normalized initial velocity		0	6.25228	4.2768	8.68619	20.0586	40.5428	63.1733		0	0.524339	4.49389	4.12971	10.4644	20.9649	36.912	60.3638		0	-1.20237	-5.1553	2.92604	7.002	14.5875	36.9139	57.864		0	5.87069	9.16053	18.7567	29.7936	43.3636	67.3058	81.0729
RAW DATA
	Time norm	0	1	5	10	50	200	400		0	1	5	10	25	50	200	400		0	1	5	10	25	50	200	400		0	1	5	10	25	50	200	400
	-9.0235	13584	13605	13573	13436	13498	14031	14051		15831	15477	15379	15846	15551	15849	15792	16356		16010	16125	15657	16011	16094	16536	16828	16366		8826	8759	8511	8917	8521	8639	8517	8863
	-8.94178	13413	13573	13525	13166	13304	13705	13975		15182	15300	15088	15483	15292	15389	15459	15868		15367	15795	15340	15428	15941	16083	16496	16094		8887	8512	8463	8830	8663	8496	8501	8908
	-8.8601	12995	13299	13478	13234	13163	13622	13783		14718	15022	14911	14971	14898	15030	15181	15282		15081	15555	15126	15340	15516	15648	16258	15860		8635	8581	8293	8684	8782	8406	8402	8869
	-8.77843	13029	13240	13236	13033	12967	13619	13174		14484	14719	14654	14928	14663	14768	14856	15148		14961	15213	14783	14969	15000	15404	15832	15430		8631	8430	8345	8737	8608	8391	8488	8905
	-8.69678	12613	13069	13243	12835	12763	12861	13033		14333	14435	14405	14465	14525	14666	14633	15249		14750	14711	14504	14708	14903	15207	15668	15579		8642	8471	8252	8649	8600	8337	8385	8769
	-8.61485	12591	12226	13081	12615	12656	12577	13001		14182	14291	14284	14274	14339	14423	14545	14422		14383	14743	14403	14494	15020	15048	15323	15298		8598	8408	8267	8635	8599	8292	8335	8802
	-8.53317	12527	12182	12822	12305	12452	12627	12822		14160	14344	14058	14183	14219	14440	14523	14469		14160	14686	14360	14433	14726	14901	15068	14809		8528	8260	8170	8471	8540	8257	8261	8750
	-8.45147	12592	12121	12655	12292	12179	12567	12663		14150	14200	13939	14102	14168	14317	14327	14372		14221	14593	14219	14462	14446	14698	14902	14739		8548	8225	8128	8545	8449	8129	8251	8679
	-8.3697	12299	12030	12777	12020	12226	12492	12638		14024	14097	13959	13841	13958	14063	14183	14572		14075	14465	14133	14209	14404	14620	14914	14833		8516	8210	8159	8452	8337	8099	8071	8596
	-8.2878	12416	11990	12403	12088	11991	12449	12564		13919	13995	13865	13742	13924	13992	14215	14314		14017	14347	13927	14052	14450	14475	14756	14350		8268	8142	8023	8434	8294	8025	8104	8529
	-8.20588	12108	12065	12203	11965	11967	12242	12534		13850	13973	13823	13722	13953	13864	14134	13765		13708	14347	13889	14061	14212	14195	14664	14162		8360	8047	8096	8306	8273	7987	8084	8490
	-8.12407	12145	11838	12233	11726	11949	12244	12549		13849	13729	13560	13686	13886	13849	14205	13642		13756	14116	13655	13739	14171	14128	14545	14347		8193	8033	8007	8306	8243	7958	7944	8414
	-8.04237	11899	11932	12214	11627	11785	12271	12531		13725	13667	13546	13406	13700	13847	13889	13494		13772	14220	13649	13819	14020	14177	14536	13813		8186	7973	7951	8230	8180	7911	7887	8442
	-7.96048	11991	11840	12095	11542	11833	12280	12418		14003	13722	13611	13568	13835	13770	13638	13384		13736	14044	13755	13734	14001	14059	14496	13672		8064	7912	7827	8196	8060	7783	7852	8251
	-7.87887	11978	11861	12077	11546	11683	12209	12263		13802	13746	13517	13496	13591	13875	13809	13447		13779	14016	13687	13825	13970	14117	14395	13968		8093	7882	7849	8119	7990	7688	7819	8215
	-7.79715	12086	11750	11849	11521	11582	12155	12310		13690	13651	13395	13469	13691	13647	13752	13512		13637	14015	13526	13701	14010	13871	14343	13959		8177	7782	7853	8050	7875	7715	7710	8349
	-7.71522	11931	11741	11768	11468	11656	12044	12222		13715	13664	13422	13392	13538	13567	13768	13124		13507	14032	13431	13543	13927	13936	14250	13613		7910	7797	7556	7988	7926	7651	7673	8151
	-7.63355	11664	11765	11707	11363	11573	11982	12100		13799	13618	13327	13447	13435	13524	13589	13539		13683	13933	13406	13575	13885	13839	14183	13713		7807	7734	7622	7863	7875	7675	7579	8074
	-7.5517	11453	11725	11604	11291	11501	11976	12115		13499	13574	13312	13294	13487	13409	13415	13458		13463	13945	13445	13406	13873	13769	13998	13499		8010	7700	7526	7919	7798	7639	7623	8058
	-7.46978	11483	11789	11625	11307	11505	11880	12052		13599	13545	13299	13122	13522	13435	13565	13132		13388	13859	13337	13451	13725	13697	13996	13429		8004	7665	7593	7933	7794	7558	7578	8028
	-7.38813	11672	11535	11122	11198	11459	11950	12072		13574	13434	13301	13029	13272	13297	13427	13446		13669	13689	13298	13336	13604	13634	14092	13650		7846	7654	7545	7853	7772	7609	7621	7946
	-7.30622	11406	11631	11236	11315	11488	12048	11931		13715	13292	13290	13112	13387	13283	13423	13362		13429	13713	13277	13345	13572	13491	13837	13401		7714	7624	7570	7867	7732	7594	7617	7892
	-7.22432	11475	11655	11085	11264	11331	11941	11980		13429	13326	13127	13105	13245	13291	13419	12977		13278	13634	13232	13219	13347	13355	13750	13489		7929	7512	7560	7783	7719	7500	7508	7813
	-7.14267	11282	11574	11174	11260	11468	11807	11928		13459	13347	13054	12967	13341	13329	13409	13326		13231	13770	13218	13207	13460	13365	13635	13605		7814	7611	7508	7728	7644	7434	7524	7862
	-7.06077	11425	11556	11213	11387	11471	11804	11928		13421	13184	13100	12986	13079	13239	13189	13271		13118	13616	13223	13056	13439	13385	13633	13352		7705	7512	7598	7662	7701	7499	7495	7847
	-6.9789	11437	11571	11137	11270	11412	11772	11867		13315	13243	13060	12724	13214	13040	13273	13140		13157	13442	13136	13008	13324	13302	13722	13423		7786	7448	7416	7617	7581	7448	7425	7700
	-6.897	11417	11507	11114	11159	11425	11740	11886		13361	13150	13061	13026	13061	13017	13221	13080		13119	13391	12976	13061	13353	13304	13632	13415		7599	7490	7490	7590	7563	7417	7452	7804
	-6.81512	11415	11541	11076	11145	11465	11681	11743		13283	13146	13043	12763	13120	13103	13252	12990		12991	13356	13052	13050	13303	13294	13509	13314		7518	7437	7517	7608	7523	7478	7488	7695
	-6.73328	11259	11566	11160	11136	11446	11593	11766		13299	13137	12954	12737	13087	13054	13126	13094		12963	13330	13078	12901	13178	13335	13585	13352		7592	7390	7441	7582	7536	7367	7351	7714
	-6.65152	11480	11462	11160	11016	11317	11716	11677		13224	13072	12918	12689	13032	13010	13173	13228		12999	13285	13015	12919	13131	13121	13401	13426		7694	7419	7399	7525	7455	7433	7443	7641
	-6.56962	11471	11516	11112	11138	11229	11633	11811		13066	13082	12923	12642	12959	12913	13098	13178		13122	13392	12915	12842	13088	13101	13481	13311		7493	7436	7344	7545	7434	7307	7270	7582
	-6.4877	11127	11581	11090	11204	11237	11680	11662		13177	12917	12978	12549	13014	12906	12983	13016		12856	13184	12871	12815	13128	13000	13401	13192		7509	7395	7398	7469	7413	7363	7361	7663
	-6.40603	11449	11396	11170	10998	11100	11543	11714		13214	12958	12905	12611	12913	12915	13018	13143		12996	13103	12975	12688	13199	12979	13291	13134		7622	7408	7375	7517	7366	7259	7333	7629
	-6.32418	11124	11506	11077	10907	11226	11543	11584		13118	12783	12938	12552	12896	12850	13024	13174		12869	13266	12944	12760	12956	13018	13222	13072		7661	7429	7383	7422	7443	7303	7342	7454
	-6.24225	11425	11378	11141	10975	11136	11539	11622		12996	12999	12916	12541	13013	12879	12966	12742		12949	13249	12927	12794	13059	12982	13298	13060		7590	7287	7352	7331	7396	7333	7377	7530
	-6.16058	11236	11463	11103	10916	11103	11525	11597		12995	12861	12829	12587	12772	12740	13030	12949		12870	13106	13002	12763	12865	13019	13332	13360		7405	7373	7194	7460	7371	7289	7288	7426
	-6.0787	11046	11452	11068	10914	11265	11343	11621		13018	12917	12803	12569	12746	12990	12935	12867		12845	13137	12902	12704	13118	12910	13242	13193		7616	7264	7265	7404	7323	7242	7247	7429
	-5.99688	11077	11407	11074	10885	11163	11506	11498		12911	12949	12799	12504	12921	12763	12872	12874		12646	13203	12894	12676	13101	13082	13112	13019		7322	7290	7345	7302	7297	7200	7269	7433
	-5.91517	11312	11370	11073	10757	11053	11388	11496		13111	12991	12942	12437	12858	12756	12894	12958		12902	13232	12840	12581	12934	12999	13205	13173		7524	7202	7193	7364	7249	7225	7169	7410
	-5.83325	11078	11430	11095	10800	11077	11466	11579		13011	12844	12791	12536	12773	12756	12868	12933		12920	13074	12897	12761	12930	12863	13161	12942		7450	7264	7283	7271	7212	7241	7157	7395
	-5.75153	11242	11375	11185	10889	10972	11352	11460		12894	12795	12711	12467	12805	12764	12976	12849		12709	13167	12964	12661	12999	12908	13189	13030		7312	7239	7254	7376	7254	7232	7206	7389
	-5.6697	11075	11386	10922	10753	11165	11431	11471		12951	12856	12743	12424	12750	12779	12876	12729		12829	13220	12924	12692	12999	12952	13130	13142		7319	7232	7227	7238	7200	7284	7092	7356
	-5.5878	10955	11385	10994	10787	10961	11390	11398		12960	12865	12769	12380	12817	12855	12796	12864		12865	13243	12819	12681	12912	12894	13154	12982		7428	7228	7277	7270	7205	7133	7120	7297
	-5.50612	10995	11234	11019	10777	10897	11350	11447		12935	12886	12645	12475	12736	12720	12887	12869		12655	13082	12805	12739	12991	12861	13248	12980		7204	7160	7140	7261	7257	7168	7122	7352
	-5.42422	11275	11311	11148	10816	10998	11422	11579		12924	12897	12708	12436	12761	12847	12850	12663		12765	13126	12764	12691	12910	12895	13100	13124		7515	7133	7194	7218	7132	7097	7110	7309
	-5.34255	11295	11308	11029	10719	10924	11326	11432		12906	12909	12845	12452	12710	12783	12797	12797		12828	13233	12803	12659	12833	12825	13084	12926		7386	7138	7192	7177	7158	7120	7021	7253
	-5.26075	11241	11397	10961	10754	11002	11303	11331		12942	12873	12797	12360	12709	12690	12843	12758		12742	12978	12823	12735	12856	12991	12985	12903		7278	7118	7208	7190	7175	7104	7107	7283
	-5.17902	11173	11224	11042	10706	10887	11354	11276		12890	12814	12747	12356	12832	12679	12867	12800		12710	13035	12897	12576	12944	12837	13111	12866		7399	7151	7150	7230	7158	7146	7129	7271
	-5.09725	11179	11319	11031	10690	10922	11215	11367		12996	12848	12805	12385	12645	12739	12815	12724		12619	13073	12882	12571	12934	12806	13018	13143		7388	7096	7101	7140	7104	7107	6997	7242
	-5.01537	11274	11262	11066	10722	10928	11339	11380		12827	12908	12714	12363	12856	12660	12921	12855		12629	13045	12765	12610	12806	12755	13091	12858		7409	7057	7137	7138	7158	7059	6994	7311
	-4.93357	11196	11342	10943	10717	10857	11269	11306		12950	12853	12718	12411	12742	12649	12751	12624		12717	13147	12665	12603	12857	12879	13062	12951		7302	7131	7150	7171	7110	7081	7046	7190
	-4.85193	11257	11227	10961	10705	10874	11404	11432		13064	12806	12638	12378	12591	12642	12823	12709		12760	13177	12673	12598	12805	12827	13038	12988		7289	7057	7028	7192	7064	7177	7004	7219
	-4.7703	11045	11230	10898	10741	10916	11198	11281		13054	12876	12741	12561	12888	12663	12855	12812		12697	12920	12805	12610	12775	12914	13264	12958		7346	7006	7063	7145	7121	7041	7020	7270
	-4.68838	11182	11136	10902	10578	10920	11119	11246		12918	12738	12878	12549	12740	12626	12738	12606		12713	13123	12863	12538	12875	12860	13195	12895		7057	7039	7041	7142	7028	7113	6985	7299
	-4.60677	10855	11104	10923	10525	10763	11196	11255		12974	12713	12809	12488	12812	12664	12769	12684		12719	13065	12729	12548	12767	12899	13013	12862		7175	6950	6931	7111	7117	7003	6983	7262
	-4.52512	10898	11085	11021	10495	10692	11125	11141		12960	12782	12679	12330	12700	12634	12719	12704		12570	12942	12718	12685	12844	12835	13135	12800		7326	7044	7161	7113	7065	7072	6966	7279
	-4.4432	11285	11032	10819	10609	10710	11142	11140		12932	12657	12642	12391	12604	12602	12748	12649		12601	13132	12714	12649	12933	12770	12913	12818		7135	7050	6984	7170	7051	7056	6972	7231
	-4.36087	10829	11083	10880	10559	10683	11047	11302		12853	12750	12807	12347	12597	12576	12702	12809		12611	12937	12697	12536	12765	12706	12961	13102		7121	6953	7149	7143	7053	7109	7065	7236
	-4.27915	11120	11037	10845	10528	10586	11068	11180		13041	12810	12761	12353	12709	12662	12895	12850		12627	12999	12644	12570	12731	12805	12944	12870		7231	6966	6953	7101	6975	7077	7009	7196
	-2.92068	11788	11784	11843	11223	11961	12618	12699		11695	11566	11460	11039	11337	11386	11933	11283		11736	11898	11405	11538	11473	11311	11757	12229		7635	7395	7485	7696	7545	7653	7302	7633
	-2.83908	11761	11723	11786	11185	11842	12373	12500		11495	11564	11307	11055	11354	11421	11872	11342		11882	11945	11373	11555	11546	11478	11867	11893		7735	7305	7283	7611	7488	7518	7291	7619
	-2.75742	11757	11808	11529	11177	11773	12395	12459		11581	11591	11467	10995	11299	11366	11848	11577		11812	11951	11338	11511	11457	11295	11773	11961		7843	7312	7247	7571	7380	7519	7305	7625
	-2.67562	11459	11718	11722	11113	11749	12450	12409		11537	11440	11395	10917	11400	11466	11775	11435		11825	11902	11374	11466	11458	11325	11671	11873		7659	7304	7319	7573	7417	7531	7249	7580
	-2.594	11647	11568	11713	11057	11701	12337	12405		11664	11519	11409	10862	11227	11391	11685	11572		11806	11927	11451	11582	11376	11270	11705	11968		7624	7323	7412	7525	7330	7445	7276	7473
	-2.51205	11570	11666	11717	11108	11605	12241	12293		11579	11528	11515	10979	11325	11366	11755	11449		11911	11908	11514	11671	11360	11325	11738	11781		7577	7336	7328	7462	7344	7412	7199	7432
	-2.43013	11642	11600	11582	10973	11661	12248	12213		11563	11631	11559	11087	11326	11397	11762	11312		11691	12010	11319	11505	11410	11299	11765	12021		7645	7206	7229	7439	7272	7430	7277	7436
	-2.34848	11385	11536	11470	10926	11591	12406	12324		11587	11448	11472	10926	11432	11268	11849	11611		11740	11984	11523	11624	11513	11397	11903	12064		7601	7311	7283	7459	7352	7335	7208	7451
	-2.26665	11325	11596	11672	11010	11705	12253	12294		11625	11751	11567	11021	11409	11340	11834	11531		11670	11948	11570	11484	11523	11417	11832	11965		7614	7323	7363	7491	7276	7420	7270	7513
	-2.1849	11663	11680	11576	11039	11742	12272	12291		11473	11510	11371	11056	11387	11478	11784	11383		11706	11925	11386	11617	11465	11443	11692	11961		7474	7235	7328	7453	7338	7432	7261	7559
	-2.10332	11594	11790	11624	11090	11736	12234	12491		11499	11521	11472	11013	11528	11361	11820	11464		11776	11841	11262	11526	11472	11418	11843	12058		7704	7272	7303	7588	7406	7371	7218	7481
	-2.0216	11559	11632	11677	11000	11615	12256	12325		11499	11449	11357	10873	11389	11311	11929	11547		11637	11858	11200	11543	11470	11227	11690	11824		7593	7251	7320	7375	7290	7482	7172	7493
	-1.93977	11397	11627	11637	11020	11643	12126	12319		11508	11548	11429	10965	11199	11269	11825	11543		11545	11962	11311	11443	11326	11194	11642	11941		7565	7404	7267	7404	7265	7416	7175	7490
	-1.85787	11475	11826	11576	10956	11535	12135	12253		11517	11406	11395	10909	11333	11292	11692	11529		11548	11786	11460	11414	11381	11234	11651	12113		7658	7243	7376	7465	7404	7354	7207	7368
	-1.77595	11370	11720	11680	11012	11635	12111	12307		11502	11470	11235	10886	11204	11184	11756	11514		11705	11823	11245	11468	11357	11287	11701	11843		7486	7293	7307	7507	7266	7338	7178	7467
	-1.69405	11719	11706	11657	11031	11608	12132	12113		11455	11329	11250	10922	11346	11348	11819	11407		11602	11737	11185	11386	11287	11229	11657	11850		7492	7204	7299	7375	7256	7394	7167	7430
	-1.61242	11498	11700	11763	11139	11516	12118	12239		11316	11367	11337	10853	11222	11293	11671	11584		11592	11807	11287	11375	11356	11279	11621	12076		7443	7137	7283	7432	7300	7327	7202	7421
	-1.5305	11446	11578	11561	11030	11502	12093	12107		11524	11401	11355	10816	11199	11243	11563	11340		11691	11816	11239	11391	11284	11295	11551	11822		7612	7140	7304	7336	7221	7278	7170	7339
	-1.4488	11591	11601	11583	11029	11600	12239	12082		11394	11340	11239	10838	11198	11388	11618	11338		11564	11746	11213	11397	11248	11197	11614	11848		7536	7179	7206	7353	7199	7212	7088	7393
	-1.36713	11579	11730	11655	11077	11388	11984	12190		11428	11421	11245	10849	11207	11260	11642	11535		11511	11755	11279	11380	11342	11224	11679	11939		7522	7224	7212	7383	7190	7315	7074	7297
	0	13700	13310	12799	12237	11732	11089	9626		12962	12233	11638	11065	11168	10383	9253	7498		12815	12833	11502	11920	11657	11201	10075	8502		7506	6849	6658	6575	6049	5544	4227	3373
	0.0817	13569	13044	12812	12216	11492	10510	8961		12937	12179	11411	11030	11027	10041	8849	7057		12558	12813	11572	11677	11417	11034	9612	7874		7548	6891	6623	6395	5866	5340	3854	3068
	0.1633	13427	13244	12732	12047	11258	10248	8329		12841	12194	11486	10886	10866	9756	8478	6467		12554	12606	11468	11656	11345	10749	9207	7337		7627	6856	6532	6420	5713	5072	3644	2815
	0.24505	13700	13095	12671	11924	11109	9860	7855		12841	12184	11382	10811	10724	9590	8213	6228		12583	12433	11277	11484	11205	10521	8842	6954		7466	6799	6567	6331	5626	4904	3420	2515
	0.326667	13735	12938	12648	11822	10942	9480	7381		12720	11892	11277	10786	10502	9454	7870	6000		12344	12427	11362	11448	11021	10347	8461	6477		7616	6713	6450	6172	5468	4734	3154	2342
	0.408367	13729	12992	12523	11621	10694	9099	6956		12822	11967	11254	10717	10379	9295	7612	5460		12449	12464	11294	11300	10992	10099	8268	6190		7513	6671	6415	6144	5322	4518	2983	2205
	0.4901	13635	12839	12470	11658	10523	8833	6600		12812	12060	11247	10713	10466	9196	7472	5193		12372	12465	11395	11337	10854	10013	7904	5797		7551	6693	6399	6010	5202	4399	2858	2053
	0.57185	13718	12834	12313	11585	10303	8500	6262		12799	12105	11237	10631	10347	9162	7155	5120		12389	12333	11357	11370	10928	10055	7649	5441		7363	6665	6419	5960	5100	4307	2729	1983
	0.65355	13483	12725	12343	11474	10193	8350	6027		12758	11930	11296	10491	10214	8992	6963	4797		12501	12373	11293	11352	10613	9638	7558	5182		7408	6670	6384	5859	5084	4182	2600	1915
	0.735183	13311	12760	12256	11463	10080	7959	5694		12816	11886	11187	10590	10090	8917	6664	4609		12381	12304	11355	11134	10567	9588	7254	4926		7608	6705	6227	5880	5019	4039	2477	1794
	0.81685	13247	12852	12343	11494	9969	7875	5464		12906	11886	11137	10378	10153	8764	6588	4436		12389	12414	11251	10984	10515	9350	6988	4729		7462	6721	6241	5778	4833	3998	2393	1744
	0.898567	13411	12852	12206	11349	9739	7642	5227		12710	11931	11090	10356	9931	8612	6397	4211		12366	12191	11155	10807	10375	9278	6714	4567		7564	6562	6206	5703	4760	3889	2325	1689
	0.9804	13784	12873	12236	11319	9665	7441	5011		12595	11826	10986	10380	9784	8531	6271	4069		12216	12068	11091	10769	10336	9057	6545	4361		7346	6724	6232	5628	4656	3679	2203	1626
	1.06202	13574	12745	12215	11241	9540	7245	4850		12687	11713	10906	10255	9703	8348	6012	3923		12197	12070	10951	10768	10187	8888	6402	4260		7501	6599	6108	5577	4609	3663	2129	1607
	1.14367	13534	12755	12197	11227	9434	7074	4625		12671	11728	11001	10220	9682	8236	5907	3820		12233	12023	10974	10779	9978	8736	6169	4017		7454	6662	6098	5498	4551	3522	2069	1544
	1.22532	13623	12707	12141	11251	9306	6796	4494		12642	11765	10864	10129	9565	8151	5754	3664		12249	12042	10967	10593	9894	8598	5937	3902		7562	6582	6091	5450	4425	3436	2014	1491
	1.30702	13404	12687	12262	11101	9144	6656	4332		12546	11700	10855	10094	9524	8079	5550	3508		12193	12050	10945	10573	9779	8447	5802	3699		7584	6550	5965	5373	4354	3353	1978	1462
	1.3886	13701	12703	12055	10944	9006	6445	4216		12654	11581	10819	9954	9438	7882	5430	3451		12293	12024	10802	10502	9815	8385	5632	3614		7399	6574	5989	5270	4324	3264	1917	1431
	1.47033	13497	12677	12099	11003	8861	6285	4018		12505	11663	10693	9938	9299	7855	5263	3313		12316	11888	11007	10454	9778	8320	5489	3509		7541	6499	5918	5313	4217	3206	1869	1395
	1.55213	13286	12660	11834	10852	8755	6138	3906		12640	11556	10767	10005	9192	7682	5207	3252		12168	11978	10741	10344	9575	8159	5391	3355		7379	6519	5947	5247	4140	3147	1807	1372
	1.63377	13426	12684	11851	10875	8581	6057	3835		12640	11595	10766	9933	9179	7626	5085	3190		12281	11966	10751	10290	9513	8060	5231	3279		7581	6507	5842	5169	4111	3085	1811	1351
	1.71557	13703	12733	11903	10821	8472	5916	3767		12573	11610	10784	9807	9031	7599	5017	3078		12165	11968	10864	10307	9412	7883	5097	3197		7405	6377	5857	5114	4014	3014	1736	1306
	1.79735	13711	12665	11950	10764	8422	5748	3654		12551	11586	10670	9792	9082	7379	4800	2951		12328	11895	10791	10282	9318	7856	5003	3099		7215	6428	5797	5039	3945	2973	1712	1317
	1.87898	13388	12576	11907	10636	8211	5642	3543		12598	11478	10850	9740	8963	7351	4729	2902		12257	11908	10653	10243	9344	7683	4894	3026		7412	6447	5827	4985	3904	2917	1653	1279
	1.96072	13668	12598	11723	10661	8207	5503	3407		12557	11563	10653	9798	8896	7309	4684	2871		12252	11908	10701	10215	9341	7683	4744	2941		7387	6478	5727	4969	3810	2836	1643	1231
	2.04227	13571	12552	11791	10652	8069	5440	3335		12566	11585	10654	9705	8866	7199	4613	2801		12359	11933	10652	10149	9203	7614	4677	2873		7332	6411	5696	4931	3788	2803	1626	1247
	2.12392	13568	12443	11613	10524	7983	5312	3274		12571	11519	10563	9692	8755	7132	4510	2749		12314	11930	10696	10165	9067	7458	4617	2826		7349	6415	5618	4914	3738	2731	1605	1226
	2.20567	13438	12476	11669	10431	7827	5128	3192		12586	11594	10471	9702	8712	7031	4377	2662		12251	11919	10688	10037	9098	7354	4512	2773		7437	6420	5654	4823	3676	2701	1570	1217
	2.28723	13447	12386	11655	10367	7762	5039	3132		12574	11441	10648	9613	8686	6960	4331	2635		12055	11766	10680	10020	8995	7291	4481	2724		7251	6371	5643	4814	3644	2610	1553	1198
	2.36888	13619	12478	11538	10405	7689	4920	3055		12590	11463	10537	9505	8485	6875	4252	2603		12175	11947	10630	9924	8933	7268	4296	2658		7206	6393	5561	4732	3557	2595	1541	1190
	2.4505	13283	12468	11547	10367	7563	4856	3008		12600	11521	10506	9497	8576	6836	4219	2567		12380	11792	10587	9820	8786	7182	4301	2606		7382	6345	5598	4707	3527	2581	1486	1174
	2.53215	13325	12423	11460	10164	7507	4817	2950		12599	11497	10499	9487	8501	6758	4113	2518		12324	11842	10531	9830	8769	6979	4180	2594		7214	6369	5600	4609	3510	2517	1461	1144
	2.6138	13221	12399	11602	10255	7400	4637	2884		12658	11429	10535	9507	8479	6702	4053	2492		12248	11866	10445	9928	8819	6995	4091	2569		7295	6435	5599	4653	3484	2508	1483	1140
	2.6957	13308	12373	11361	10208	7289	4578	2849		12563	11400	10481	9415	8430	6672	3969	2439		12218	11768	10538	9790	8683	6916	3993	2502		7231	6377	5470	4605	3390	2479	1469	1124
	2.77733	13774	12271	11454	10122	7253	4494	2783		12540	11403	10528	9413	8269	6494	3901	2408		12175	11734	10526	9732	8596	6862	3988	2471		7303	6353	5488	4552	3407	2445	1420	1116
	2.85885	13629	12447	11323	10108	7102	4407	2785		12633	11439	10458	9193	8260	6516	3871	2371		12284	11704	10461	9830	8523	6765	3918	2437		7317	6383	5417	4551	3331	2373	1427	1106
	2.94042	13289	12254	11304	10082	7084	4390	2721		12683	11483	10396	9356	8197	6426	3791	2331		12249	11758	10383	9790	8568	6647	3862	2360		7236	6345	5503	4492	3298	2360	1405	1100
	3.02207	13366	12250	11426	9960	7024	4258	2630		12439	11543	10456	9292	8178	6328	3723	2277		12182	11699	10385	9786	8432	6650	3770	2355		7220	6288	5395	4412	3235	2334	1374	1101
	3.10378	13361	12320	11273	9959	6910	4253	2675		12539	11311	10382	9277	8128	6389	3717	2277		12250	11762	10384	9650	8345	6540	3763	2309		7278	6330	5404	4431	3235	2292	1380	1070
	3.1853	13317	12200	11173	9935	6774	4136	2577		12530	11422	10422	9218	8099	6344	3634	2238		12215	11676	10264	9549	8276	6497	3700	2293		7193	6313	5363	4389	3229	2333	1379	1051
	3.26695	13185	12263	11235	9883	6743	4099	2563		12418	11434	10421	9194	7991	6172	3601	2198		12190	11751	10378	9609	8251	6429	3639	2255		7221	6315	5292	4396	3127	2248	1380	1050
	3.3486	13647	12157	11270	9921	6693	4036	2516		12472	11397	10269	9262	7979	6163	3549	2189		12242	11602	10376	9555	8202	6366	3554	2244		7234	6250	5305	4333	3157	2212	1330	1049
	3.43032	13446	12156	11100	9744	6603	3928	2472		12530	11431	10262	9071	7904	5974	3561	2202		12246	11662	10247	9457	8118	6249	3530	2211		7139	6330	5302	4304	3133	2207	1323	1048
	3.51213	13508	12109	11096	9737	6550	3890	2455		12511	11441	10354	9109	7868	6075	3436	2148		12192	11711	10172	9505	8107	6270	3463	2189		7164	6260	5262	4273	3082	2183	1307	1042
	3.59382	13517	12219	11134	9718	6454	3879	2428		12647	11373	10340	9051	7838	5995	3437	2111		12273	11761	10193	9463	8064	6150	3455	2175		7147	6228	5221	4248	3038	2162	1309	1030
	3.67545	13497	12185	11233	9723	6518	3791	2409		12531	11371	10194	9049	7769	5926	3342	2081		12207	11645	10155	9424	7964	6088	3399	2157		7203	6258	5196	4196	3030	2128	1300	1025
	3.75708	13379	12227	11201	9687	6355	3820	2374		12508	11268	10185	9064	7719	5821	3306	2065		12029	11661	10203	9369	7935	6058	3375	2139		7182	6236	5246	4156	2978	2134	1311	1004
	3.83885	13196	12280	10982	9626	6276	3714	2325		12546	11449	10261	8862	7680	5770	3299	2070		12144	11626	10082	9243	7863	5906	3302	2094		7245	6226	5112	4141	2937	2103	1272	993
	3.92077	13257	12140	10979	9478	6202	3683	2312		12469	11346	10108	8899	7618	5731	3197	2059		12060	11494	10140	9247	7874	5910	3275	2110		7245	6232	5090	4103	2930	2068	1276	996
	4.00265	13592	12145	10987	9531	6235	3667	2297		12432	11380	10093	8883	7510	5648	3205	1996		12129	11651	10178	9284	7833	5850	3257	2038		7189	6197	5136	4071	2925	2048	1254	967
	4.08445	13151	12133	10935	9464	6100	3609	2263		12500	11341	10049	8851	7512	5620	3185	2000		12217	11579	10045	9217	7680	5864	3191	2032		7111	6268	5098	4075	2893	2010	1274	971
	4.16607	13292	12079	11019	9553	6078	3550	2226		12492	11297	10072	8874	7533	5540	3151	1968		12191	11463	10086	9191	7707	5792	3131	2018		7335	6246	5072	4026	2875	2017	1268	958
	4.24773	13502	12092	10878	9479	6080	3492	2232		12516	11167	10101	8746	7428	5570	3089	1948		12106	11510	9972	9079	7621	5684	3083	1971		7128	6231	5133	3972	2800	2026	1223	935
	4.32938	13494	12049	10902	9400	5902	3465	2212		12384	11182	10046	8836	7374	5528	3045	1963		12133	11494	10053	9142	7551	5645	3037	1978		7162	6159	5105	3978	2781	1960	1215	955
	4.411	13397	12091	10887	9356	5897	3424	2185		12458	11191	10053	8691	7347	5437	3055	1948		12066	11406	9972	9124	7546	5634	3045	1976		7086	6153	5058	3932	2739	1961	1229	918
	4.4927	13574	11980	10945	9376	5850	3399	2170		12410	11189	9985	8766	7271	5430	3045	1902		12047	11514	9861	9017	7479	5519	3004	1975		7191	6135	4992	3916	2737	1939	1242	937
	4.57445	13114	12034	10813	9215	5775	3333	2134		12572	11212	10074	8669	7231	5350	2960	1914		12166	11520	9818	8898	7424	5502	3044	1970		7233	6050	4995	3900	2711	1910	1176	921
	4.65628	13153	12017	10776	9233	5779	3316	2112		12412	11273	10079	8601	7245	5320	2958	1895		12159	11474	9873	8952	7409	5474	2918	1911		7229	6115	4998	3847	2695	1907	1220	926
	4.73812	13408	11985	10754	9236	5695	3266	2082		12457	11151	10009	8594	7242	5238	2922	1878		12065	11520	9816	8892	7331	5407	2918	1877		7223	6131	5009	3851	2666	1887	1182	918
	4.81983	13074	11940	10761	9277	5625	3239	2088		12324	11211	9828	8525	7145	5237	2903	1883		12021	11543	9798	8913	7372	5389	2927	1871		7295	6223	4916	3785	2644	1910	1177	911
	4.9014	13031	11989	10661	9122	5653	3207	2073		12367	11147	9984	8459	7099	5169	2870	1878		12046	11472	9803	8899	7304	5314	2869	1890		7018	6102	4876	3630	2650	1878	1188	906
	4.98305	13122	12002	10748	9141	5582	3155	2031		12346	11191	9869	8512	7024	5114	2846	1869		12048	11479	9811	8774	7275	5214	2854	1847		7205	6153	4892	3640	2610	1857	1173	906
	5.06472	13569	12012	10743	9182	5466	3169	2022		12596	11292	9856	8521	7064	5067	2832	1836		12168	11414	9784	8799	7243	5214	2831	1852		7059	6123	4857	3609	2566	1838	1157	917
	5.14638	13367	11817	10614	9079	5409	3072	2021		12443	11165	9797	8463	7044	5046	2803	1814		11983	11333	9842	8810	7136	5204	2803	1844		7037	6093	4936	3554	2578	1821	1152	880
	5.22808	13535	12043	10687	9092	5359	3163	1990		12318	11166	9827	8499	6912	5022	2753	1777		11931	11365	9760	8663	7106	5098	2740	1804		7293	6015	4870	3540	2572	1831	1149	891
	5.30988	13469	12090	10613	8964	5412	3052	1980		12437	11081	9855	8505	6838	4966	2761	1764		12074	11446	9690	8677	7046	5030	2744	1830		7255	6024	4840	3564	2541	1793	1164	876
	5.39162	13068	11950	10601	8885	5297	3056	1972		12347	11115	9754	8348	6813	4954	2751	1705		12023	11398	9718	8537	7004	5029	2736	1795		7130	6005	4807	3544	2524	1758	1144	861
	5.47318	13140	12000	10603	8931	5297	3001	1949		12364	11090	9814	8292	6846	4863	2719	1749		11958	11348	9686	8543	6981	4974	2681	1788		7094	5902	4807	3502	2532	1751	1123	870
	5.5549	13646	11926	10533	8942	5233	2981	1956		12349	11020	9662	8276	6788	4808	2725	1728		12064	11363	9509	8606	6926	4981	2678	1758		7197	5940	4733	3524	2484	1767	1129	868
	5.6368	13197	11854	10533	8994	5234	2953	1937		12384	11137	9685	8254	6779	4838	2664	1707		12035	11306	9570	8630	6825	4928	2647	1743		7083	5879	4771	3434	2477	1734	1123	852
	5.71842	13241	11810	10586	8773	5175	2958	1922		12351	11107	9676	8299	6702	4821	2637	1710		11943	11518	9573	8423	6872	4928	2649	1759		7073	5898	4720	3454	2442	1737	1100	833
	5.80012	13472	11934	10437	8864	5172	2905	1930		12306	11056	9668	8171	6738	4742	2628	1677		11893	11333	9655	8494	6824	4902	2604	1756		7276	5961	4726	3459	2416	1711	1119	844
	5.88197	13222	11886	10362	8836	5070	2913	1873		12383	11114	9555	8215	6700	4722	2613	1694		11928	11253	9501	8382	6777	4815	2601	1727		7103	5898	4687	3455	2378	1735	1105	847
	5.96373	13038	11940	10397	8722	5055	2886	1899		12339	11062	9636	8173	6634	4749	2555	1686		11954	11342	9605	8365	6759	4807	2604	1712		7102	5880	4672	3387	2398	1695	1113	838
	6.04553	12944	11900	10421	8693	5005	2841	1878		12462	10992	9597	8141	6554	4670	2577	1661		12051	11358	9535	8446	6654	4721	2562	1723		7148	5930	4664	3433	2399	1688	1086	829
	6.12712	13267	11923	10457	8743	5017	2816	1849		12464	10916	9599	8144	6522	4628	2568	1694		11983	11171	9500	8340	6629	4689	2532	1724		7047	5956	4633	3399	2371	1675	1090	829
	6.20887	13470	11923	10391	8685	4963	2793	1871		12368	11014	9546	8170	6445	4595	2523	1624		11911	11217	9536	8337	6610	4623	2489	1663		7074	5883	4658	3396	2392	1692	1074	811
	6.29048	13312	11818	10325	8685	4945	2779	1862		12298	11059	9635	8055	6496	4556	2504	1652		11907	11199	9444	8313	6587	4656	2507	1680		7148	5898	4603	3333	2316	1669	1065	825
	6.37215	13405	11865	10434	8691	4940	2777	1814		12317	11004	9580	8042	6343	4544	2522	1627		12015	11234	9512	8281	6506	4649	2504	1671		7067	5915	4575	3345	2305	1659	1066	818
	6.454	13010	11920	10264	8661	4843	2738	1819		12449	10994	9460	7990	6332	4519	2498	1661		11846	11247	9353	8249	6500	4577	2479	1665		7060	5868	4614	3298	2299	1650	1064	816
	6.53577	13227	11818	10300	8559	4816	2697	1795		12199	11021	9500	7997	6386	4481	2446	1587		11898	11250	9301	8214	6487	4602	2417	1651		7045	5907	4565	3270	2271	1630	1066	807
	6.61753	13298	11819	10296	8619	4767	2729	1837		12294	11038	9599	7953	6280	4412	2455	1604		11867	11257	9357	8150	6388	4503	2451	1621		7259	5859	4565	3259	2281	1637	1058	796
	6.69913	13245	11839	10322	8642	4746	2662	1788		12351	10932	9519	7914	6320	4474	2459	1620		11822	11284	9330	8113	6418	4481	2393	1646		7086	5876	4539	3263	2228	1629	1049	797
	6.78085	13181	11774	10254	8587	4730	2662	1814		12280	10955	9451	7864	6230	4373	2408	1571		11939	11067	9370	8140	6380	4400	2410	1611		7113	5856	4556	3224	2253	1622	1048	794
	6.86247	13427	11848	10263	8493	4667	2657	1781		12215	11033	9456	7865	6197	4378	2371	1604		11851	11276	9395	8099	6318	4427	2394	1638		7007	5902	4490	3197	2216	1609	1035	796
	6.94417	13259	11702	10134	8436	4663	2635	1763		12428	11158	9363	7882	6205	4338	2401	1588		11761	11355	9239	8114	6285	4409	2380	1625		7033	5871	4490	3211	2189	1570	1035	791
	7.02605	13397	11708	10307	8377	4586	2625	1755		12273	10961	9315	7888	6179	4321	2406	1576		12018	11163	9369	7991	6219	4386	2367	1614		7039	5858	4417	3180	2219	1554	1052	778
	7.10762	13492	11781	10101	8381	4551	2632	1763		12399	10879	9401	7843	6110	4224	2352	1606		11784	11110	9210	8030	6291	4302	2348	1604		7202	5853	4461	3167	2224	1576	1046	771
	7.18937	13114	11663	10146	8336	4527	2599	1765		12277	10786	9336	7832	6099	4218	2352	1545		11725	11193	9179	7972	6240	4299	2358	1562		7157	5848	4430	3135	2178	1584	1025	770
	7.27113	13166	11749	10155	8402	4552	2582	1756		12273	10884	9339	7776	6123	4206	2307	1504		11883	11233	9204	7984	6240	4278	2286	1565		6893	5839	4492	3123	2149	1561	1016	756
	7.35292	13051	11728	10205	8374	4570	2547	1711		12403	10962	9325	7751	6054	4159	2330	1526		11794	11179	9128	7955	6166	4241	2282	1569		7027	5839	4426	3091	2142	1572	1010	762
	7.4345	13508	11858	10172	8301	4478	2576	1722		12320	10887	9355	7737	6053	4194	2358	1556		11856	11054	9273	7940	6209	4264	2309	1580		7148	5761	4409	3079	2121	1553	1013	748
	7.51613	13295	11691	10249	8300	4484	2516	1726		12311	10954	9357	7683	5968	4120	2289	1546		11806	11218	9073	7901	6140	4241	2289	1561		6953	5823	4372	3089	2125	1553	1000	764
	7.59778	13183	11688	10047	8284	4486	2489	1686		12248	10951	9308	7687	5954	4120	2315	1543		11784	11078	9233	7794	6033	4199	2272	1533		6967	5775	4406	3053	2107	1528	990	756
	7.6794	12998	11722	10046	8223	4382	2496	1687		12130	10906	9232	7659	5958	4088	2297	1521		11848	11086	9074	7797	6001	4137	2245	1543		7101	5769	4292	3041	2135	1534	1000	750
	7.76107	13121	11592	10034	8123	4338	2512	1676		12226	10952	9298	7637	5911	4085	2271	1551		11890	11118	9121	7772	6030	4102	2253	1520		6959	5723	4374	3049	2096	1517	1006	739
	7.84272	13327	11735	10028	8183	4378	2490	1680		12131	10795	9244	7580	5904	4066	2256	1502		11701	11150	9127	7767	5988	4137	2268	1532		7163	5847	4318	3036	2077	1503	997	753
	7.92448	13489	11686	10014	8106	4288	2445	1670		12262	10881	9155	7550	5908	4066	2238	1468		11811	11020	9162	7740	5953	4110	2257	1521		7189	5794	4260	3015	2080	1517	992	725
	8.00628	13137	11711	10030	8075	4367	2453	1665		12187	10855	9142	7566	5851	3998	2230	1491		11841	11156	9042	7776	5943	4019	2215	1481		7088	5766	4280	2991	2067	1499	982	737
	8.08787	13295	11570	10041	8086	4279	2433	1668		12221	10876	9134	7580	5799	3952	2251	1511		11809	11101	9045	7616	5811	4055	2209	1510		6943	5752	4283	2974	2061	1486	988	716
	8.16948	13274	11676	9889	8036	4267	2410	1661		12217	10909	9302	7545	5759	3953	2220	1466		11732	11003	8991	7707	5846	3989	2191	1504		6892	5724	4302	2951	2030	1485	972	735
	8.25127	13361	11663	9863	8155	4232	2439	1637		12286	10921	9191	7490	5777	3914	2191	1451		11717	10968	8965	7628	5898	4003	2168	1504		7090	5709	4231	2954	2050	1473	979	724
	8.33315	13329	11713	9881	8044	4162	2416	1643		12194	10845	9157	7484	5706	3915	2204	1454		11775	10964	8984	7636	5765	3968	2171	1487		7109	5724	4233	2973	1995	1467	956	703
	8.41502	13056	11700	9995	8040	4144	2405	1629		12250	10788	9089	7434	5723	3894	2206	1451		11744	11019	8925	7613	5889	3955	2186	1457		6870	5683	4247	2964	2026	1467	979	714
	8.4968	13132	11632	9896	8042	4141	2377	1604		12045	10747	9132	7449	5665	3876	2198	1430		11861	11031	8848	7620	5748	3914	2152	1463		6897	5742	4223	2922	1980	1484	965	702
	8.57827	13254	11517	9816	7916	4167	2332	1625		12260	10832	9111	7432	5595	3849	2196	1468		11875	11046	9012	7549	5716	3878	2179	1473		6935	5716	4231	2910	1996	1454	957	708
	8.65998	13368	11639	9875	7949	4113	2351	1635		12194	10797	9097	7378	5627	3826	2153	1431		11724	10928	8921	7615	5728	3901	2139	1442		6937	5703	4195	2922	1995	1464	957	722
	8.74162	13463	11632	9885	7826	4056	2329	1586		12098	10789	9062	7369	5589	3814	2139	1441		11756	10964	8906	7541	5680	3890	2139	1451		6995	5722	4202	2886	1967	1419	950	711
	8.82335	12987	11610	9757	7899	4036	2314	1607		12237	10775	9041	7360	5585	3820	2132	1450		11788	10964	8914	7570	5621	3815	2135	1430		6955	5685	4171	2900	1963	1453	959	690
	8.90498	13115	11588	9953	7884	4040	2303	1595		12178	10803	9045	7378	5515	3792	2131	1392		11819	11006	8838	7445	5554	3800	2078	1462		6892	5696	4143	2883	1964	1441	949	700
	8.98677	13207	11482	9895	7832	4073	2292	1580		12064	10798	8946	7358	5530	3754	2128	1441		11773	10995	8861	7516	5618	3792	2103	1440		6902	5717	4171	2842	1943	1417	956	685
	9.06853	13366	11613	9758	7800	4012	2303	1562		12152	10732	9113	7308	5488	3754	2098	1394		11945	11007	8834	7399	5548	3758	2101	1405		7158	5743	4178	2846	1952	1408	953	696
	9.15023	13355	11569	9782	7878	4000	2282	1556		12033	10794	8981	7251	5450	3723	2097	1409		11762	11018	8820	7467	5561	3749	2112	1463		6927	5720	4086	2856	1949	1410	954	693
	9.23197	13238	11578	9821	7754	3961	2287	1587		12126	10759	9051	7326	5546	3710	2114	1417		11690	10966	8743	7381	5562	3756	2091	1454		7082	5649	4083	2828	1919	1434	923	674
	9.3137	13166	11619	9791	7780	3932	2301	1579		12093	10742	8994	7252	5485	3666	2069	1365		11667	10963	8778	7356	5506	3661	2099	1398		6928	5617	4072	2819	1903	1415	951	679
	9.39525	13355	11559	9702	7729	3923	2247	1549		12165	10775	8850	7173	5432	3652	2065	1409		11814	10854	8809	7360	5497	3691	2084	1401		7068	5683	4066	2771	1905	1404	935	664
	9.47698	13273	11544	9670	7721	3915	2277	1556		12078	10730	8949	7135	5372	3616	2069	1385		11828	10850	8758	7336	5441	3695	2055	1404		6909	5699	4093	2780	1900	1397	913	655
	9.55878	13105	11529	9608	7727	3853	2292	1560		12064	10697	8973	7216	5346	3602	2043	1392		11706	10874	8698	7247	5398	3640	2041	1394		7074	5621	4044	2775	1885	1388	916	667
	9.64063	13276	11400	9732	7777	3879	2247	1532		12100	10663	8892	7151	5375	3581	2043	1392		11698	10958	8729	7309	5416	3661	2030	1369		6868	5606	4014	2748	1893	1386	907	664
	9.72227	13232	11483	9599	7657	3877	2231	1537		12103	10714	8948	7120	5319	3627	2038	1344		11635	10761	8722	7245	5359	3608	2024	1391		7072	5585	4076	2721	1887	1363	892	665
	9.80398	13120	11534	9651	7723	3820	2229	1519		12191	10641	8857	7126	5264	3655	2043	1384		11686	10733	8694	7205	5330	3575	2019	1372		6863	5585	4050	2730	1884	1400	913	667
	9.88575	13006	11471	9560	7662	3828	2225	1530		12062	10690	8804	7085	5307	3502	2029	1338		11587	10937	8567	7190	5401	3560	2035	1356		7036	5630	3986	2734	1865	1384	918	669
	9.96735	13354	11489	9685	7616	3786	2217	1511		12076	10687	8788	7096	5229	3616	2037	1361		11668	10832	8655	7230	5343	3577	2002	1382		7093	5612	4035	2698	1866	1383	914	649
	10.049	13230	11421	9543	7540	3786	2163	1500		12067	10637	8862	7119	5328	3546	2000	1328		11681	10846	8583	7264	5321	3564	2008	1362		6927	5575	3970	2712	1850	1355	913	655
	10.1309	13294	11547	9629	7483	3749	2172	1508		12126	10701	8891	7086	5223	3536	2031	1357		11741	10812	8608	7175	5285	3575	2014	1394		6926	5601	4013	2718	1851	1371	903	646
	10.2128	13228	11388	9595	7513	3725	2225	1493		12090	10686	8759	7038	5146	3484	2027	1314		11687	10826	8536	7148	5238	3542	1985	1349		6959	5610	3985	2718	1872	1373	904	651
	10.2944	13175	11492	9528	7537	3731	2154	1475		12030	10647	8799	6929	5193	3501	2008	1360		11721	10738	8602	7091	5214	3535	1953	1379		6827	5577	3996	2684	1836	1360	917	645
	10.3761	13066	11434	9516	7479	3703	2148	1495		12099	10610	8732	7020	5120	3544	2013	1336		11589	10918	8605	7151	5195	3476	1979	1342		6900	5584	3960	2685	1846	1366	892	624
	10.4579	13220	11445	9385	7516	3662	2131	1510		12107	10585	8792	6935	5149	3475	1977	1341		11706	10879	8541	7133	5247	3443	1975	1377		6915	5552	3930	2683	1835	1349	880	626
	10.5396	12977	11242	9544	7467	3694	2124	1494		12179	10657	8701	6994	5049	3471	1992	1336		11740	10854	8440	7058	5160	3426	1970	1333		6853	5528	3954	2679	1814	1349	890	636
	10.6213	13220	11469	9564	7434	3647	2176	1494		11987	10621	8757	6949	5107	3436	1968	1310		11595	10912	8481	6993	5179	3438	1963	1331		6942	5565	3903	2661	1791	1329	887	640
	10.7029	13384	11491	9520	7478	3634	2153	1465		12101	10692	8700	6919	5109	3442	1953	1327		11666	10781	8524	7059	5198	3471	1949	1319		6929	5575	3950	2632	1795	1330	894	625
	10.7846	12972	11359	9337	7446	3635	2118	1461		12148	10594	8754	6891	5079	3416	1939	1311		11635	10695	8406	6993	5098	3404	1975	1320		6855	5523	3847	2617	1819	1340	889	625
	10.8662	13198	11508	9385	7440	3618	2121	1449		12114	10571	8689	6887	4988	3413	1952	1332		11545	10700	8504	6981	5115	3438	1918	1323		7005	5499	3870	2624	1772	1331	884	625
	10.9479	13200	11434	9497	7361	3599	2131	1455		12119	10690	8626	6842	5022	3412	1947	1316		11602	10744	8479	6950	5126	3406	1943	1353		6889	5549	3874	2616	1796	1317	875	632
	11.0297	13012	11420	9435	7383	3583	2080	1445		12103	10604	8578	6876	4973	3367	1901	1318		11582	10656	8420	6875	5067	3390	1925	1299		7049	5515	3828	2626	1784	1302	867	628
	11.1115	13206	11352	9409	7359	3615	2083	1469		12053	10618	8670	6871	4989	3336	1946	1279		11651	10722	8456	6900	5042	3408	1907	1289		6995	5499	3842	2604	1770	1326	870	626
	11.193	13080	11395	9454	7372	3520	2074	1449		11984	10628	8659	6865	4960	3329	1936	1300		11680	10785	8424	6903	5045	3373	1893	1314		7107	5518	3833	2581	1780	1309	891	625
	11.2746	13284	11409	9438	7327	3534	2067	1463		12108	10583	8608	6873	4983	3297	1909	1322		11490	10667	8516	6877	4977	3347	1923	1309		7027	5497	3804	2614	1768	1332	855	612
	11.3563	13282	11322	9303	7327	3543	2054	1431		12006	10621	8571	6842	4953	3320	1896	1290		11593	10654	8342	6889	4985	3295	1898	1316		6835	5442	3806	2564	1725	1327	864	618
	11.4381	13276	11313	9420	7267	3484	2060	1419		11974	10513	8624	6808	4944	3308	1925	1300		11559	10593	8319	6808	4961	3317	1911	1288		6790	5563	3834	2562	1764	1319	855	604
	11.5199	13084	11391	9396	7255	3470	2064	1427		12075	10570	8622	6778	4914	3337	1920	1266		11527	10611	8364	6841	4952	3291	1899	1279		7018	5508	3847	2566	1756	1315	850	608
	11.6015	13130	11277	9281	7268	3446	2031	1418		12004	10524	8548	6772	4874	3285	1876	1283		11614	10761	8382	6812	4924	3309	1900	1317		6847	5429	3757	2540	1755	1309	851	610
	11.6835	12983	11283	9271	7267	3452	2061	1407		12151	10541	8496	6771	4853	3267	1880	1259		11643	10684	8230	6805	4883	3272	1899	1280		7023	5496	3792	2511	1746	1295	850	605
	11.7651	13113	11322	9225	7251	3449	2069	1432		12023	10474	8515	6748	4814	3243	1886	1264		11676	10701	8277	6771	4948	3263	1858	1280		6907	5477	3746	2529	1755	1293	845	612
	11.8467	13232	11337	9317	7185	3449	2071	1408		12130	10504	8523	6684	4845	3252	1880	1255		11679	10697	8330	6795	4887	3271	1874	1296		6842	5470	3780	2550	1722	1289	849	599
	11.9286	13187	11384	9221	7268	3429	2039	1414		12115	10552	8512	6747	4840	3246	1879	1266		11470	10704	8215	6782	4869	3238	1854	1261		6861	5430	3730	2504	1728	1289	846	599
	12.0103	13166	11305	9226	7147	3419	2038	1387		11955	10527	8580	6648	4842	3204	1877	1232		11536	10750	8237	6674	4865	3212	1882	1255		7004	5439	3729	2476	1723	1278	857	590
	12.0919	13184	11368	9198	7177	3411	2012	1376		12033	10582	8521	6698	4781	3198	1860	1266		11590	10683	8266	6719	4820	3216	1864	1280		6875	5426	3763	2555	1705	1265	832	592
	12.1736	13027	11245	9194	7155	3352	2002	1371		12066	10602	8544	6589	4765	3225	1880	1279		11552	10694	8184	6675	4828	3180	1870	1264		7099	5393	3769	2474	1698	1283	843	595
	12.2554	13250	11217	9169	7078	3360	1998	1387		12056	10436	8428	6687	4782	3202	1863	1248		11604	10665	8165	6694	4790	3168	1865	1248		6997	5477	3711	2493	1702	1290	843	577
	12.3372	12930	11281	9174	7024	3431	2020	1368		12073	10491	8400	6644	4714	3184	1843	1227		11608	10694	8202	6698	4793	3173	1835	1276		6823	5444	3738	2464	1700	1272	841	585
	12.419	13065	11281	9233	7073	3351	1980	1366		12012	10491	8390	6643	4678	3176	1856	1247		11477	10600	8173	6607	4779	3171	1847	1275		6842	5439	3719	2442	1669	1258	830	575
	12.5007	13012	11225	9135	7130	3335	1985	1354		12041	10453	8394	6526	4706	3150	1818	1216		11565	10610	8211	6654	4745	3166	1857	1254		6770	5380	3690	2447	1699	1272	839	587
	12.5825	12971	11329	9188	7071	3306	1997	1360		12039	10528	8402	6594	4657	3099	1847	1235		11545	10579	8214	6618	4714	3182	1804	1250		6784	5455	3668	2438	1680	1264	834	578
	12.6641	13007	11316	9110	7055	3357	1986	1381		12047	10483	8368	6535	4645	3124	1839	1245		11558	10520	8100	6550	4679	3127	1822	1245		6820	5440	3629	2412	1697	1235	823	585
	12.7459	12984	11212	9186	7027	3319	1985	1385		11940	10531	8383	6533	4645	3089	1837	1224		11522	10665	8148	6604	4678	3146	1802	1214		7166	5365	3681	2454	1700	1229	823	570
	12.8275	13184	11177	9002	7005	3308	1955	1351		11957	10347	8355	6465	4598	3096	1816	1240		11578	10631	8110	6602	4720	3128	1798	1210		7030	5415	3631	2454	1658	1262	822	580
	12.9092	13088	11242	9070	7049	3320	1965	1339		11995	10497	8354	6458	4637	3115	1800	1202		11554	10510	8077	6510	4697	3131	1815	1292		6928	5393	3661	2439	1650	1243	827	574
	12.991	12906	11317	9118	6980	3269	1974	1374		12013	10422	8402	6489	4624	3086	1806	1233		11460	10575	8115	6547	4651	3082	1801	1238		6870	5424	3631	2415	1676	1247	820	580
	13.0727	12925	11131	9204	6923	3244	1941	1357		11963	10378	8298	6486	4583	3112	1802	1224		11503	10595	8199	6520	4657	3069	1780	1257		7095	5341	3634	2376	1664	1243	825	576
	13.1545	12962	11204	9025	6907	3251	1975	1351		12062	10440	8364	6579	4560	3077	1804	1252		11488	10625	8034	6464	4657	3082	1798	1200		6777	5383	3645	2406	1646	1227	814	568
	13.2363	12768	11175	9051	6930	3226	1939	1342		11901	10428	8333	6442	4613	3086	1772	1195		11411	10478	8039	6444	4590	3115	1782	1192		6846	5318	3627	2406	1636	1242	809	571
	13.3178	13042	11198	9101	6957	3224	1926	1330		11895	10342	8276	6575	4556	3115	1805	1204		11609	10564	8118	6398	4625	3073	1768	1197		6968	5316	3624	2413	1661	1237	816	557
	13.3995	13069	11264	8975	6848	3229	1926	1342		11941	10340	8253	6373	4525	3067	1773	1224		11489	10478	8035	6465	4587	3038	1763	1215		6750	5341	3626	2398	1615	1225	823	560
	13.4811	13131	11189	8997	6849	3187	1950	1354		11944	10377	8329	6371	4530	3044	1780	1192		11473	10563	8058	6459	4576	2999	1793	1205		6972	5314	3630	2373	1671	1218	818	569
	13.5628	13173	11194	9097	6875	3181	1911	1334		11925	10322	8280	6377	4471	3013	1769	1196		11438	10589	7973	6327	4560	3027	1768	1192		6913	5404	3570	2371	1628	1225	808	554
	13.6444	12887	11174	8953	6905	3244	1913	1319		11958	10397	8269	6379	4504	3037	1783	1195		11484	10517	7991	6434	4560	3010	1759	1186		6828	5353	3565	2407	1652	1234	807	552
	13.7261	13058	11236	8990	6862	3168	1937	1326		11958	10412	8302	6362	4551	3049	1773	1208		11562	10524	8040	6373	4541	3005	1794	1190		6773	5286	3626	2363	1624	1222	806	561
	13.8077	12898	11193	9043	6833	3135	1928	1308		11982	10427	8308	6235	4493	2999	1752	1192		11554	10499	7920	6406	4538	2971	1737	1185		6878	5308	3535	2347	1616	1239	796	551
	13.8894	13185	11104	9035	6850	3149	1891	1335		11885	10334	8295	6327	4476	3004	1757	1217		11619	10390	7950	6358	4475	2967	1756	1181		6742	5309	3561	2324	1613	1226	807	536
	13.971	12983	11140	8851	6807	3160	1900	1306		11998	10397	8185	6314	4483	2998	1746	1172		11461	10511	7919	6303	4476	2964	1759	1176		6829	5313	3560	2359	1627	1222	797	546
	14.0526	13044	11062	8941	6859	3154	1909	1327		11983	10366	8198	6311	4432	2927	1738	1170		11440	10578	7944	6255	4450	2981	1753	1158		6871	5350	3579	2333	1599	1209	799	546
	14.1344	13216	11144	8819	6795	3112	1880	1339		12011	10332	8197	6322	4383	2945	1719	1148		11376	10609	7987	6277	4445	2983	1762	1155		6755	5342	3529	2324	1618	1218	785	550
	14.2159	13077	11057	8992	6921	3132	1879	1289		11981	10243	8144	6247	4418	3001	1751	1175		11571	10544	7905	6305	4445	2992	1727	1163		6791	5288	3519	2340	1603	1204	781	539
	14.2976	12828	11214	8973	6630	3086	1921	1307		11944	10278	8130	6251	4398	2946	1734	1167		11539	10581	7873	6231	4386	2975	1739	1149		6932	5277	3499	2318	1606	1209	794	540
	14.3792	13077	11086	8870	6750	3126	1896	1317		11888	10378	8105	6284	4346	2935	1736	1180		11564	10577	7889	6274	4440	2936	1728	1159		6837	5298	3472	2348	1594	1183	785	533
	14.461	13043	11137	8893	6666	3093	1884	1309		11850	10360	8286	6214	4374	2928	1744	1157		11470	10417	7824	6299	4410	2964	1727	1159		6732	5302	3536	2282	1567	1207	808	530
	14.5426	13066	11040	8841	6742	3073	1890	1317		11993	10380	8146	6197	4316	2924	1729	1145		11567	10494	7805	6207	4371	2904	1703	1167		6931	5221	3495	2303	1567	1204	797	545
	14.6242	13079	11161	8914	6748	3066	1890	1283		11948	10278	8160	6196	4392	2961	1735	1150		11474	10560	7863	6247	4384	2924	1720	1192		6820	5270	3496	2290	1602	1206	789	520
	14.7061	13002	11158	8957	6645	3076	1866	1285		11979	10277	8118	6226	4368	2929	1714	1175		11531	10478	7802	6196	4345	2924	1713	1137		6709	5286	3473	2303	1583	1194	792	530
	14.7878	12957	11055	8980	6647	3094	1826	1278		11949	10304	8124	6190	4311	2925	1693	1146		11525	10430	7860	6203	4358	2908	1706	1145		6783	5279	3457	2303	1580	1195	790	537
	14.8694	13087	11126	8913	6627	3060	1861	1277		11863	10300	8025	6177	4288	2895	1700	1159		11385	10585	7923	6207	4348	2900	1705	1159		6742	5264	3474	2274	1572	1207	773	529
	14.9511	13032	11091	8787	6662	3080	1857	1276		11860	10349	8061	6169	4316	2868	1712	1192		11430	10549	7892	6176	4318	2910	1691	1134		6706	5274	3455	2290	1599	1182	770	520
	15.0329	13185	11105	8766	6623	3075	1861	1278		11876	10220	8047	6191	4282	2877	1704	1146		11397	10345	7812	6127	4357	2835	1691	1137		6734	5249	3457	2280	1587	1206	777	519
	15.1147	13007	11098	8813	6583	3041	1852	1251		11876	10377	8050	6190	4272	2873	1713	1133		11484	10396	7776	6097	4331	2824	1681	1172		6859	5199	3451	2239	1548	1206	767	522
	15.1965	13258	11068	8752	6594	3022	1815	1265		11939	10305	7970	6150	4265	2874	1701	1144		11384	10368	7809	6178	4336	2828	1704	1144		6941	5219	3409	2258	1573	1179	769	516
	15.2782	12840	11092	8810	6612	3023	1836	1267		11905	10276	8003	6119	4331	2869	1680	1122		11342	10520	7803	6129	4299	2809	1688	1159		6928	5213	3431	2250	1540	1172	766	527
	15.3601	13039	11088	8699	6545	3014	1800	1270		11878	10293	8029	6091	4303	2874	1688	1105		11415	10398	7754	6147	4266	2790	1691	1119		6714	5281	3433	2233	1564	1177	772	511
	15.4416	12962	11038	8738	6493	2968	1856	1261		11918	10301	8068	6168	4235	2828	1680	1123		11389	10385	7744	6125	4288	2808	1654	1118		6846	5238	3416	2234	1563	1176	758	518
	15.5233	12887	11054	8723	6497	2982	1833	1264		12084	10305	8051	6073	4193	2809	1665	1139		11458	10426	7706	6062	4222	2806	1701	1139		6878	5202	3390	2231	1558	1196	762	509
	15.6052	13136	10997	8688	6586	2962	1805	1264		11918	10233	7931	6051	4224	2780	1697	1122		11475	10308	7778	6105	4232	2784	1667	1106		6816	5178	3372	2242	1537	1175	765	521
	15.6869	13126	11034	8677	6522	2965	1825	1278		11808	10218	8049	6043	4209	2787	1687	1115		11379	10257	7761	6034	4218	2796	1679	1114		6798	5237	3367	2199	1553	1191	767	512
	15.7686	13059	11166	8720	6522	2943	1813	1249		11915	10256	7955	6095	4159	2791	1648	1095		11202	10362	7683	6064	4194	2756	1673	1119		6897	5243	3357	2226	1537	1174	782	507
	15.8505	13000	10986	8713	6517	2964	1796	1244		11839	10295	7969	6028	4160	2776	1667	1093		11444	10330	7687	6051	4199	2752	1664	1095		6797	5208	3392	2248	1555	1170	768	506
	15.932	13020	11026	8702	6522	2923	1799	1233		11926	10207	8012	6039	4182	2817	1635	1128		11387	10368	7661	6048	4181	2718	1659	1102		6756	5261	3370	2215	1554	1174	764	509
	16.0137	13067	11113	8755	6457	2926	1771	1249		11895	10210	7872	5954	4175	2797	1666	1119		11433	10263	7704	6056	4150	2751	1687	1093		6900	5206	3351	2214	1538	1155	767	503
	16.0954	13032	11013	8696	6442	2895	1775	1238		11916	10342	7988	6040	4170	2759	1676	1105		11385	10355	7654	6037	4173	2738	1686	1086		6853	5276	3371	2185	1517	1168	746	506
	16.1772	12865	10973	8634	6384	2912	1784	1239		11912	10237	7940	5985	4154	2780	1661	1106		11298	10322	7681	5987	4158	2719	1648	1114		6944	5205	3315	2199	1535	1181	742	501
	16.2589	12945	10900	8723	6371	2972	1760	1219		11823	10216	7991	5978	4122	2748	1641	1092		11400	10457	7662	6000	4168	2721	1623	1080		6926	5229	3338	2205	1531	1151	755	508
	16.3406	13005	10978	8653	6550	2897	1751	1242		11849	10311	7915	6003	4145	2754	1652	1101		11377	10362	7703	5947	4136	2704	1624	1071		6883	5129	3330	2188	1492	1143	747	488
	16.4221	12991	10868	8694	6391	2912	1788	1237		11880	10187	7946	5999	4075	2772	1635	1100		11462	10327	7673	5891	4086	2746	1644	1104		6965	5154	3369	2197	1519	1164	746	502
	16.5038	12990	11067	8664	6386	2893	1763	1226		11954	10193	7915	5917	4150	2757	1641	1100		11288	10282	7670	5927	4088	2673	1636	1082		6980	5193	3320	2167	1504	1117	748	496
	16.5855	13199	10964	8685	6364	2854	1765	1226		11707	10165	7871	5993	4071	2707	1643	1112		11331	10340	7594	5946	4107	2742	1635	1075		6722	5181	3340	2180	1528	1156	737	491
	16.6672	12780	10965	8654	6389	2898	1765	1237		11807	10226	7940	5947	4097	2736	1657	1095		11363	10335	7602	5958	4101	2657	1654	1082		6748	5130	3342	2178	1510	1165	747	502
	16.749	12847	10968	8614	6417	2895	1784	1235		11839	10153	7935	5911	4004	2753	1651	1100		11380	10353	7604	5897	4076	2665	1621	1099		6898	5147	3337	2153	1510	1148	736	495
	16.8307	13002	10947	8554	6379	2894	1759	1238		11898	10140	7866	5947	4104	2743	1636	1080		11374	10310	7553	5867	4080	2622	1632	1116		6707	5157	3329	2157	1524	1153	742	490
	16.9125	12960	10959	8625	6326	2867	1776	1195		11719	10227	7838	5879	4016	2707	1622	1080		11422	10303	7493	5911	4007	2673	1613	1065		6949	5136	3314	2155	1504	1139	729	495
	16.9942	13001	10969	8643	6349	2863	1772	1195		11869	10239	7858	5847	4021	2728	1626	1056		11303	10324	7509	5826	4060	2670	1603	1071		6867	5160	3292	2151	1492	1145	720	480
	17.0758	13074	10938	8479	6285	2868	1774	1201		11925	10100	7817	5869	4039	2713	1637	1075		11472	10301	7543	5843	4018	2652	1638	1069		6659	5107	3267	2138	1503	1151	741	482
	17.1575	13015	10962	8571	6335	2865	1703	1186		11840	10279	7813	5794	3985	2682	1592	1064		11410	10291	7615	5897	4077	2603	1593	1073		6643	5102	3298	2137	1481	1134	732	480
	17.2392	12884	10908	8504	6293	2852	1756	1201		11919	10217	7723	5853	4003	2710	1592	1027		11409	10281	7551	5881	3982	2630	1614	1049		6684	5168	3284	2128	1457	1138	739	492
	17.3208	13100	10804	8418	6352	2824	1730	1188		11820	10148	7791	5882	3955	2695	1622	1076		11276	10231	7545	5816	4018	2640	1587	1038		6718	5102	3295	2152	1484	1122	717	469
	17.4024	12988	11057	8469	6356	2832	1752	1201		11903	10277	7816	5786	3987	2692	1588	1049		11310	10344	7562	5864	3986	2664	1596	1075		6746	5121	3255	2117	1481	1121	728	483
	17.4841	13025	10985	8467	6231	2828	1740	1190		11786	10138	7768	5803	3974	2670	1600	1065		11355	10172	7512	5832	3988	2640	1572	1050		6735	5157	3261	2140	1481	1123	715	475
	17.5658	12947	10870	8437	6213	2767	1736	1187		11762	10127	7845	5849	3952	2700	1639	1038		11389	10193	7533	5761	3967	2610	1566	1059		6710	5101	3228	2103	1471	1141	734	478
	17.6474	12890	10830	8488	6186	2843	1749	1192		11850	10139	7797	5819	3913	2721	1597	1058		11474	10188	7443	5845	3956	2599	1603	1086		6691	5113	3248	2099	1485	1118	726	469
	17.7292	12985	10934	8508	6229	2810	1725	1197		11855	10213	7843	5765	3895	2638	1602	1050		11367	10271	7478	5789	3941	2597	1616	1073		6846	5098	3224	2100	1484	1123	721	469
	17.8109	12963	10943	8411	6163	2808	1728	1184		11734	10136	7758	5732	3943	2644	1589	1047		11473	10210	7524	5688	4003	2619	1583	1041		6737	5066	3237	2095	1480	1117	712	474
	17.8926	13043	10795	8361	6202	2767	1708	1195		11791	10102	7785	5745	3920	2638	1615	1053		11354	10210	7435	5781	3951	2555	1553	1049		6667	5088	3235	2110	1477	1129	713	466
	17.9742	13150	10833	8465	6151	2775	1715	1183		11775	10118	7713	5761	3939	2628	1568	1048		11359	10258	7442	5770	3932	2608	1597	1038		6759	5090	3237	2122	1480	1118	712	481
	18.0558	12778	10838	8382	6120	2769	1695	1154		11745	10159	7701	5695	3889	2594	1600	1056		11351	10267	7481	5748	3927	2589	1579	1032		6758	5019	3215	2099	1471	1118	712	471
	18.1375	12963	10869	8417	6168	2744	1721	1184		11802	10140	7711	5777	3921	2602	1585	1050		11353	10109	7358	5700	3901	2618	1571	1032		6913	5051	3186	2114	1448	1141	708	472
	18.2192	13124	10936	8429	6190	2769	1675	1175		11763	10152	7718	5768	3932	2661	1584	1042		11263	10162	7483	5706	3901	2546	1576	1075		6798	5073	3228	2096	1463	1121	721	468
	18.3011	12900	10816	8547	6183	2737	1717	1165		11749	10141	7696	5710	3919	2615	1586	1031		11410	10134	7395	5781	3901	2560	1567	1062		6704	5109	3226	2043	1467	1114	697	473
	18.383	12877	10862	8341	6065	2770	1698	1166		11749	10132	7729	5730	3864	2608	1563	1016		11361	10225	7375	5656	3904	2545	1583	1023		6819	5105	3169	2073	1444	1094	705	470
	18.4646	13079	10999	8412	6155	2713	1720	1175		11748	10133	7678	5720	3916	2638	1574	1050		11400	10196	7411	5691	3885	2575	1555	1039		6784	5061	3217	2117	1432	1113	713	469
	18.5462	13131	10885	8407	6116	2776	1708	1180		11838	10078	7680	5624	3881	2612	1577	1047		11336	10332	7422	5685	3883	2581	1566	1015		6628	5109	3195	2080	1463	1108	689	460
	18.628	12690	10778	8418	6098	2781	1685	1170		11830	10186	7677	5657	3891	2627	1551	1030		11293	10211	7344	5635	3861	2541	1538	1016		6699	5107	3169	2075	1456	1111	698	455
	18.7098	12830	10857	8427	6077	2772	1692	1154		11861	10101	7609	5667	3902	2597	1594	1023		11298	10191	7304	5670	3848	2551	1555	1056		6751	5066	3204	2061	1444	1113	697	451
	18.7917	12897	10884	8325	6125	2718	1681	1166		11708	10080	7681	5673	3798	2612	1587	1018		11304	10240	7355	5676	3870	2538	1554	1024		6697	5009	3123	2048	1434	1103	701	458
	18.8734	12884	10836	8361	6083	2726	1670	1175		11808	10081	7639	5668	3824	2597	1569	1022		11285	10151	7326	5644	3829	2541	1557	997		6660	5084	3187	2077	1463	1088	698	453
	18.9551	12929	10860	8439	6107	2743	1673	1173		11865	10112	7614	5669	3840	2570	1565	1013		11208	10260	7425	5657	3843	2540	1547	1018		6828	5062	3166	2054	1443	1097	696	462
	19.0369	12829	10858	8250	6032	2713	1700	1162		11828	10027	7604	5683	3839	2588	1557	1018		11307	10179	7307	5673	3860	2554	1551	1005		6689	5098	3169	2065	1455	1095	690	455
	19.1186	12750	10859	8303	6008	2700	1678	1139		11709	10042	7584	5639	3800	2547	1572	1001		11309	10189	7335	5630	3823	2554	1532	1005		6688	4997	3123	2030	1456	1088	688	449
	19.2004	13044	10871	8273	6081	2696	1670	1141		11785	10017	7642	5613	3749	2570	1542	987		11310	10267	7317	5545	3838	2536	1571	1011		6627	5001	3166	2040	1422	1081	692	456
	19.2821	12785	10815	8227	6049	2697	1692	1134		11578	10058	7593	5577	3745	2569	1537	1005		11277	10164	7298	5590	3774	2506	1538	994		6729	5018	3119	2043	1410	1102	690	457
	19.3637	12840	10733	8284	6012	2716	1643	1132		11862	9973	7591	5558	3751	2547	1538	974		11272	10167	7287	5566	3778	2529	1520	992		6674	5031	3132	2025	1420	1092	690	444
	19.4453	12786	10913	8321	5978	2648	1663	1146		11755	10228	7570	5579	3763	2557	1530	1005		11451	10117	7259	5541	3761	2494	1525	990		6884	5017	3119	2031	1418	1091	699	445
	19.527	12840	10863	8307	5941	2679	1697	1138		11693	10084	7604	5530	3784	2582	1528	991		11312	10168	7302	5527	3779	2474	1518	994		6698	5009	3158	2054	1431	1084	689	447
	19.6087	12736	10919	8303	6030	2668	1667	1137		11802	10039	7498	5543	3755	2534	1542	997		11307	10083	7274	5558	3756	2489	1519	998		6637	5001	3139	2009	1421	1095	675	444
	19.6906	13052	10826	8263	5950	2658	1672	1127		11763	10050	7631	5585	3746	2542	1528	1009		11303	10097	7224	5527	3761	2482	1521	982		6638	5011	3118	2042	1423	1085	693	447
	19.7723	12962	10778	8288	5871	2652	1680	1129		11702	10075	7510	5529	3765	2554	1555	977		11334	10077	7355	5504	3754	2538	1534	998		6652	4953	3128	2016	1424	1063	683	443
	19.8541	12788	10820	8216	5989	2677	1655	1136		11667	9991	7584	5515	3733	2544	1529	998		11304	10149	7240	5538	3754	2513	1525	991		6609	4973	3121	2019	1423	1075	673	446
	19.9358	12909	10744	8242	5969	2665	1636	1102		11682	9992	7532	5512	3687	2518	1528	1006		11354	10047	7203	5500	3776	2483	1545	976		6861	5035	3099	2028	1426	1064	684	439
	20.0177	12808	10814	8283	5998	2633	1647	1133		11725	9956	7539	5486	3727	2529	1522	981		11363	10044	7261	5516	3770	2486	1511	984		6830	5022	3100	2010	1416	1068	686	430
	20.0993	13035	10685	8209	5954	2616	1636	1115		11658	10126	7531	5500	3691	2508	1534	985		11365	10107	7324	5455	3731	2504	1522	992		6800	4987	3115	1991	1414	1069	674	449
	20.1809	12838	10845	8261	5910	2654	1640	1097		11673	9988	7535	5494	3697	2540	1522	975		11342	10170	7186	5475	3682	2456	1502	979		6574	4951	3074	1983	1410	1077	674	444
	20.2626	12857	10698	8158	5921	2601	1633	1134		11710	9951	7473	5505	3691	2510	1511	1007		11252	10048	7292	5488	3710	2494	1513	968		6700	5012	3090	2005	1407	1077	672	439
	20.3443	12902	10755	8215	5920	2599	1667	1117		11700	9932	7450	5506	3691	2501	1482	983		11192	10085	7161	5499	3690	2492	1521	973		6773	4977	3110	1990	1404	1068	672	431
	20.426	11137	416	180	272	464	617	562		11743	10000	7482	5461	3678	2503	1502	1014		11373	10101	7175	5443	3715	2499	1499	966		6733	1709	1304	611	485	388	260	183
	20.5077	11578	278	127	165	327	511	500		11832	10016	7517	5513	3697	2512	1507	969		11286	10024	7124	5452	3676	2428	1505	980		6601	1716	1300	616	472	382	245	175
	20.5893	11304	209	102	122	236	423	433		11652	10072	7472	5494	3681	2482	1524	988		11296	10182	7149	5433	3637	2452	1501	970		6652	1703	1335	621	478	378	240	166
	20.6711	11179	174	81	91	188	341	384		11733	9990	7495	5486	3636	2500	1493	989		11297	10065	7105	5472	3693	2423	1501	963		6607	1737	1339	615	474	375	230	151
	20.7527	11239	149	67	79	148	284	342		11811	9885	7526	5452	3631	2477	1508	986		11240	10046	7137	5424	3615	2451	1515	963		6612	1728	1355	635	478	378	237	155
	22.0785	11372	133	60	73	127	258	307		12535	282	116	173	306	388	606	558		11557	308	109	252	360	472	674	596		6592	1731	1381	637	486	376	231	145
	22.16	11234	120	52	68	118	232	279		12613	252	101	141	240	309	515	493		11405	251	88	173	223	321	537	548		6749	1741	1362	626	478	381	225	142
	22.2419	11512	113	44	51	95	196	260		12553	216	87	113	197	254	439	455		11510	207	73	128	163	235	446	463		6600	1736	1363	609	468	382	228	143
	22.3235	11260	108	43	46	99	195	234		12635	206	84	90	175	216	378	421		11442	179	71	102	138	186	372	418		6677	1719	1371	621	479	377	219	135
	22.4052	11195	108	39	44	79	170	219		12689	189	67	76	150	197	325	386		11600	185	60	90	117	157	316	385		6741	1738	1354	625	483	376	225	131
	22.487	11387	100	38	39	68	152	197		12650	175	67	68	124	179	302	342		11530	170	56	75	88	138	277	343		6778	1721	1364	627	473	376	221	130
	22.5688	11242	97	30	35	62	150	197		12546	170	55	59	106	173	267	317		11569	153	50	62	78	118	247	310		6755	1727	1385	619	471	374	219	125
	22.6504	11483	94	32	40	60	133	183		12630	162	55	56	88	143	241	280		11545	155	45	57	65	100	228	276		6691	1722	1382	628	477	374	221	121
	22.7322	11347	90	32	32	52	124	173		12433	162	51	51	80	127	217	279		11421	144	44	44	57	87	190	263		6704	1742	1371	627	472	381	217	125
	22.8139	11188	87	26	28	51	118	163		12544	162	49	49	77	106	198	258		11401	161	41	50	49	82	183	237		6685	1713	1345	619	472	381	236	119
	22.8956	11169	90	24	26	47	108	158		12431	156	45	40	67	94	178	239		11405	141	38	38	45	64	163	228		6644	1701	1377	613	472	383	224	124
	22.9772	11338	85	26	24	48	96	145		12374	170	43	38	55	82	168	228		11396	144	33	38	42	60	164	213		6698	1734	1369	624	470	377	215	123
	23.0588	11265	81	27	22	38	98	141		12358	150	42	36	50	76	157	211		11547	147	40	33	40	58	139	195		6606	1734	1396	603	490	369	221	122
	23.1405	11474	86	29	20	32	89	135		12347	153	41	30	49	70	150	197		11500	145	35	31	35	49	129	184		6565	1719	1377	627	479	372	224	115
	23.2222	11215	81	26	20	35	84	129		12317	137	41	29	44	65	142	181		11443	131	34	31	37	48	121	171		6640	1703	1371	621	474	377	228	124
	23.3037	11115	81	25	19	31	88	121		12433	139	38	30	45	64	131	180		11452	136	37	33	33	44	120	166		6665	1729	1414	607	488	385	221	116
[truncated: 13 more columns]

## Sheet: Fig3E
Elen-ts
Lipid to protein ratio 50
Manganese titration
		Mn2+(uM)	V (F/min)
		0	0	0	0	0
		1	5.87069	-1.20237	0.524339	6.25228
		5	9.16053	-5.1553	4.49389	4.2768
		10	18.7567	2.92604	4.12972	8.68619
		25	29.7936	7.002	10.4644
		50	43.3636	14.5875	20.965	20.0586
		200	67.3058	36.9139	36.912	40.5428
		400	81.0729	57.864	60.3638	63.1733
			Km = 124uM
			Vmax = 82

## Sheet: Fig3F
Elen-ts
Lipid to protein ratio 50
Manganese titration
in presence of Mg2+
NORMALIZED DATA																																								Concentrations
		Concentrations Mn/Mg (uM/mM)																																						Mean	SEM	N
	Time norm	0	50/0	50/0	50/500	50/500	50/500	50/2000	50/2000		0	50/0	50/0	50/0	50/500	50/500	50/500	50/2000		0	50/0	50/500	50/500	50/500	50/2000	50/2000	50/2000		0	50/0	50/0	50/0	50/500	50/500	50/2000	50/2000			Time (min)	0 μM Mn2+ / 0 mM Mg2+			50 μM Mn2+ / 0 mM Mg2+			50 μM Mn2+ / 0.5 mM Mg2+			50 μM Mn2+ / 2 mM Mg2+
	-7.19417	151.417	161.611	164.391	153.633	162.622	154.249	161.067	169.949		112.914	146.968	138.718	141.216	136.631	127.31	125.841	122.688		140.576	155.1	152.715	153.546	159.645	155.985	160.531	155.744		119.221	201.373	177.835	172.058	157.228	146.448	141.715	134.076			-7.19417	131.032	9.0111	4	162.141	6.62008	9	148.17	3.82426	11	150.219
	-7.1275	148.634	159.594	160.995	152.922	162.014	150.991	158.561	168.683		113.753	145.116	137.967	141.32	137.311	125.157	124.833	120.737		139.63	154.254	152.197	151.044	155.216	153.274	160.947	154.385		118.491	203.104	174.639	172.108	158.048	147.767	140.566	135.873			-7.1275	130.127	8.34837	4	161.011	6.76984	9	147.046	3.78066	11	149.128
	-7.06067	145.179	155.73	159.728	149.782	158.562	148.47	155.43	166.512		113.878	146.877	134.719	138.936	137.175	124.466	124.895	119.891		138.302	151.871	148.995	150.584	155.146	151.561	155.593	154.935		119.882	204.06	176.289	173.711	159.325	146.874	141.222	136.499			-7.06067	129.31	7.41457	4	160.213	7.20107	9	145.843	3.6393	11	147.705
	-6.99405	145.013	153.07	156.855	148.854	158.298	147.974	153.5	164.712		110.943	143.264	135.784	139.23	136.546	123.979	124.864	120.708		137.293	153.217	150.114	150.454	153.912	150.481	154.653	151.084		117.483	202.985	177.32	173.911	158.778	146.108	141.427	137.241			-6.99405	127.683	8.0464	4	159.515	7.20812	9	145.444	3.62263	11	146.726
	-6.92727	141.837	151.617	156.402	146.459	155.064	144.309	150.855	160.474		110.971	143.391	134.789	139.16	135.288	123.68	126.105	120.106		135.816	150.858	147.622	148.897	153.689	149.683	154.296	150.792		117.727	203.642	179.588	172.008	158.231	147.299	142.494	136.186			-6.92727	126.588	7.30355	4	159.051	7.39453	9	144.24	3.41295	11	145.611
	-6.86068	140.906	149.172	151.785	144.316	152.758	142.602	150.104	160.311		110.538	143.573	132.937	137.606	134.336	122.769	123.747	118.27		136.283	151.061	147.635	148.566	151.48	147.278	154.01	148.681		118.457	203.582	178.866	173.761	157.729	146.023	142.781	139.508			-6.86068	126.546	7.20374	4	158.038	7.61797	9	142.906	3.44107	11	145.118
	-6.79388	138.744	149.307	150.971	142.333	150.086	141.171	148.625	158.488		111.936	141.158	133.304	136.466	133.231	122.816	123.174	119.074		134.286	148.022	144.878	145.086	149.659	147.102	151.999	148.422		120.681	201.552	177.371	171.808	157.729	147.129	139.951	135.912			-6.79388	126.412	6.16769	4	156.662	7.47994	9	141.572	3.32169	11	143.697
	-6.72728	138.599	146.175	148.889	142.07	148.893	140.665	148.221	153.936		109.867	140.813	131.61	135.464	132.738	121.402	122.336	117.295		133.298	148.665	143.518	145.487	148.731	147.031	151.737	145.705		116.51	200.657	178.557	172.359	160.784	145.257	142.453	136.303			-6.72728	124.569	6.79538	4	155.91	7.65459	9	141.08	3.51615	11	142.835
	-6.66077	134.213	146.231	148.029	141.657	146.45	140.907	145.541	154.169		109.029	139.942	132.606	134.341	131.77	120.396	121.002	118.901		133.394	144.924	142.266	143.304	147.874	143.945	146.882	148.827		118.665	203.284	175.722	173.811	156.224	147.001	139.869	132.591			-6.66077	123.825	6.0897	4	155.432	7.90123	9	139.896	3.36874	11	141.341
	-6.5939	131.016	143.932	146.575	141.176	144.581	139.795	145.102	151.405		107.966	139.27	131.156	133.719	131.498	119.217	122.072	116.377		131.927	143.661	142.819	142.773	147.639	142.584	147.787	148.052		118.491	201.134	178.763	171.758	158.596	148.065	139.418	135.952			-6.5939	122.35	5.6906	4	154.441	7.95992	9	139.839	3.48053	11	140.834
	-6.52737	132.806	141.42	143.738	140.488	142.964	137.043	144.663	150.093		106.247	137.927	129.707	131.093	129.968	116.782	119.87	115.259		129.675	144.519	141.748	142.159	147.274	142.361	147.132	143.571		118.248	203.164	177.371	171.557	157	144.875	140.935	137.007			-6.52737	121.744	6.03894	4	153.388	8.3291	9	138.197	3.56798	11	140.128
	-6.4605	131.688	141.206	143.307	140.03	141.897	136.328	141.728	149.013		106.177	137.146	128.746	131.802	128.897	116.373	119.063	113.882		128.708	142.684	139.232	139.705	145.348	141.915	146.668	141.931		118.874	200.299	175.825	171.557	159.234	146.576	139.705	134.779			-6.4605	121.362	5.75441	4	152.508	8.10415	9	137.517	3.70694	11	138.703
	-6.39398	128.864	141.363	142.203	139.056	141.335	137.45	141.347	148.386		105.87	135.585	127.454	131.301	127.979	114.551	118.877	114.298		128.049	140.145	139.184	138.584	142.634	139.885	145.109	143.459		118.77	201.313	179.742	170.506	157.182	145.045	139.91	135.248			-6.39398	120.388	5.35359	4	152.179	8.49324	9	136.534	3.62526	11	138.455
	-6.32738	126.391	138.321	141.644	139.239	141.473	136.977	141.416	145.68		106.359	134.641	126.877	130.437	128.387	115.258	117.993	112.706		126.636	139.049	137.258	138.796	142.234	139.392	144.503	141.875		118.179	199.761	175.67	170.956	155.221	146.661	140.074	135.287			-6.32738	119.391	4.76793	4	150.817	8.37299	9	136.318	3.54725	11	137.617
	-6.26055	128.202	138.513	142.051	138.322	138.64	135.755	141.335	144.101		103.913	134.895	127.122	128.969	126.007	114.205	116.209	113.05		126.031	138.275	137.065	137.168	141.859	139.017	143.027	138.405		117.449	200.896	176.134	170.205	155.084	145.427	137.572	134.701			-6.26055	118.899	5.50816	4	150.784	8.50047	9	135.067	3.64234	11	136.401
	-6.19403	128.419	136.451	139.132	136.924	137.94	135.348	139.187	143.463		103.662	134.041	125.69	128.71	126.738	113.042	116.271	112.233		125.011	137.619	135.994	135.988	140.19	137.878	141.873	138.428		117.032	199.821	175.412	168.753	153.944	142.96	138.884	132.786			-6.19403	118.531	5.50078	4	149.514	8.52397	9	134.122	3.51144	11	135.591
	-6.12723	127.395	137.194	139.563	136.787	138.754	136.559	139.337	143.497		103.494	131.881	123.874	128.105	125.922	113.608	115.806	110.899		123.704	135.617	136.054	135.587	138.922	137.585	139.993	138.574		116.475	200.478	174.794	167.752	154.72	147.214	140.484	132.982			-6.12723	117.767	5.27042	4	148.806	8.68834	9	134.539	3.66893	11	135.419
	-6.06065	127.943	136.563	138.714	136.007	138.686	136.779	139.314	144.415		103.41	132.135	124.136	126.827	125.922	112.524	114.999	111.502		124.161	136.237	135.247	134.903	138.111	135.907	140.54	138.024		115.919	200.896	174.381	167.702	154.948	144.364	137.613	134.779			-6.06065	117.858	5.43088	4	148.621	8.74286	9	133.863	3.6761	11	135.262
	-5.99405	125.46	136.699	139.923	135.652	137.825	134.654	139.799	145.332		102.082	130.937	123.664	128.019	124.511	111.518	115.93	107.859		123.151	136.523	134.995	135.268	137.888	137.069	140.04	136.373		116.475	198.448	173.505	166.85	153.397	141.855	138.966	134.623			-5.99405	116.792	5.26032	4	148.285	8.4635	9	133.045	3.54891	11	135.008
	-5.92722	125.522	136.631	139.516	135.182	138.651	133.135	138.159	143.079		100.699	131.064	123	127.397	123.78	111.376	113.215	108.174		122.833	135.486	134.694	133.239	137.805	136.506	138.767	132.914		116.441	201.672	173.969	169.004	155.768	143.386	137.162	133.802			-5.92722	116.374	5.5612	4	148.638	8.88714	9	132.748	3.85217	11	133.57
	-5.8607	121.922	135.82	140.144	136.477	138.25	133.421	138.436	143.904		100.936	130.029	122.948	125.669	123.1	112.115	113.246	107.758		122.822	134.724	135.127	134.914	137.089	135.743	139.338	135.295		115.815	196.716	173.814	168.152	152.896	141.812	137.9	131.653			-5.8607	115.374	5.05791	4	147.557	8.56314	9	132.586	3.64408	11	133.753
	-5.79387	122.295	135.831	137.446	133.532	137.172	132.904	137.35	142.046		101.104	128.25	123.35	126.136	122.811	111.816	113.091	107.529		123.204	133.937	133.574	134.655	137.383	134.393	139.327	134.273		115.259	195.821	173.454	167.852	154.72	143.088	137.736	132.044			-5.79387	115.466	5.10571	4	146.897	8.53983	9	132.25	3.76127	11	133.087
	-5.72727	125.202	134.659	138.516	134.827	137.034	133.245	138.99	144.368		99.1894	129.448	122.04	124.253	121.112	111.109	112.921	107.615		121.919	134.652	134.128	134.419	136.889	134.429	138.434	132.521		115.502	198.746	175.876	168.553	154.492	142.62	137.654	131.223			-5.72727	115.453	5.78325	4	147.416	8.97508	9	132.072	3.8219	11	133.154
	-5.66045	125.74	135.099	138.179	133.715	136.805	132.739	137.361	140.06		100.126	128.068	121.918	125.376	121.333	112.225	110.408	106.367		122.535	135.486	134.645	134.159	136.983	134.44	139.707	131.87		114.911	196.358	174.278	165.949	154.537	142.62	137.9	134.115			-5.66045	115.828	5.70545	4	146.746	8.61684	9	131.834	3.8783	11	132.728
	-5.59393	121.219	136.146	136.865	134.025	136.392	133.08	136.402	141.361		100.363	127.451	121.865	123.89	120.755	109.585	113.045	105.277		120.665	134.807	133.165	133.558	135.714	135.391	139.089	133.375		115.224	197.493	171.856	166.049	153.671	142.748	136.464	134.74			-5.59393	114.368	4.86011	4	146.269	8.6943	9	131.431	3.82799	11	132.762
	-5.52737	121.043	137.42	136.841	134.174	136.529	132.023	136.16	141.396		101.09	126.725	121.516	122.888	119.565	110.025	111.323	105.234		120.824	133.508	133.093	133.263	135.35	134.605	137.899	132.476		116.058	198.269	173.918	167.051	152.12	140.961	137.162	132.982			-5.52737	114.754	4.69755	4	146.459	8.95307	9	130.766	3.78118	11	132.239
	-5.46047	123.164	135.842	137.167	133.521	135.658	132.056	136.125	139.352		97.9175	126.797	120.119	122.318	120.585	109.365	110.067	104.603		121.026	134.08	132.792	132.732	135.679	133.607	137.625	127.131		114.807	195.522	172.784	167.601	152.896	142.748	135.316	134.271			-5.46047	114.229	5.71861	4	145.803	8.78666	9	130.736	3.91811	11	131.004
	-5.39397	121.653	134.017	136.318	134.071	135.509	131.55	135.836	140.246		98.3508	127.124	120.398	123.182	119.072	108.972	108.934	105.234		121.26	133.437	133.129	132.944	135.691	133.607	136.661	131.061		115.05	195.463	171.392	166.4	152.531	140.196	135.685	133.138			-5.39397	114.079	5.45632	4	145.303	8.68481	9	130.236	3.95024	11	131.434
	-5.32715	123.112	135.189	135.574	132.512	135.91	130.845	134.346	140.409		98.5465	126.634	122.529	121.886	118.256	108.422	109.663	103.384		120.272	132.066	133.791	131.764	134.516	132.751	137.03	127.793		115.016	194.746	170.825	164.196	152.257	141.089	135.931	133.099			-5.32715	114.236	5.4923	4	144.849	8.53002	9	129.911	3.94874	11	130.593
	-5.26055	123.319	132.98	135.027	132.81	134.683	130.867	134.531	139.364		96.5479	125.018	119.071	120.539	117.984	108.187	108.066	103.026		119.358	132.424	131.311	132.519	134.152	132.516	136.554	128.04		113.903	194.627	171.34	164.897	150.661	141.472	135.316	133.06			-5.26055	113.282	5.90251	4	143.992	8.83129	9	129.337	3.94375	11	130.301
	-5.19402	122.191	135.279	134.097	132.294	135.371	131.462	133.942	140.687		95.9888	123.675	119.508	120.556	117.151	108.847	108.438	103.901		118.795	133.031	131.552	131.292	134.281	132.234	136.899	127.31		113.278	194.149	171.392	164.146	150.752	141.642	135.234	129.699			-5.19402	112.563	5.82206	4	143.981	8.76243	9	129.371	3.92889	11	129.988
	-5.1272	122.098	133.206	133.574	131.905	132.102	130.218	134.531	137.947		96.3382	125.091	119.909	119.053	118.001	108.532	108.531	102.725		119.454	130.922	130.841	130.348	133.823	131.859	136.614	127.748		113.208	193.851	171.186	163.145	150.844	139.515	135.152	131.887			-5.1272	112.775	5.78708	4	143.326	8.77425	9	128.606	3.80536	11	129.808
	-5.06063	124.674	133.758	134.481	131.561	133.479	129.26	134.392	138.156		97.4284	123.729	119.246	121.403	115.961	106.568	108.407	102.538		118.243	130.958	131.419	130.95	132.824	131.554	137.066	126.502		114.425	193.194	169.485	163.796	150.661	138.579	135.644	133.177			-5.06063	113.692	5.81921	4	143.339	8.62602	9	128.152	3.93272	11	129.879
	-4.99375	123.143	132.879	133.074	132.902	132.527	130.559	133.318	136.321		94.9825	124.564	117.394	119.71	115.842	107.118	105.91	102.624		119.358	130.922	129.577	129.416	132.448	130.627	134.412	126.962		111.922	194.149	170.773	161.693	150.251	139.005	135.316	133.06			-4.99375	112.351	6.24111	4	142.795	8.83603	9	127.778	4.00323	11	129.08
	-4.92725	123.681	133.138	134.306	130.873	132.378	130.306	134.519	137.541		96.9672	122.658	118.075	118.449	115.519	107.385	106.778	101.592		117.85	129.933	129.228	129.912	133.13	130.697	135.519	126.48		111.505	191.463	169.278	164.497	149.111	137.771	136.013	133.763			-4.92725	112.501	5.74376	4	142.422	8.7239	9	127.49	3.85368	11	129.515
	-4.86068	122.202	133.183	133.422	131.515	132.217	129.359	132.29	136.159		95.2341	122.549	116.87	118.535	114.873	106.662	106.313	101.907		118.753	131.208	128.927	129.487	131.156	129.359	134.222	128.119		113.173	190.627	167.835	162.744	149.02	139.09	134.454	131.809			-4.86068	112.34	5.99777	4	141.886	8.57195	9	127.147	3.93093	11	128.54
	-4.79385	122.439	132.394	132.655	132.145	131.529	129.106	131.597	136.554		98.211	122.93	117.429	116.773	113.565	106.521	106.111	101.821		117.584	130.195	129	128.295	132.542	129.477	134.436	125.076		111.887	192.657	168.918	163.145	150.068	138.664	132.855	131.419			-4.79385	112.53	5.23757	4	141.9	8.86658	9	127.05	4.03645	11	127.904
	-4.72725	122.615	133.183	131.829	130.415	132.401	128.369	131.793	135.207		95.1363	122.93	117.342	117.015	114.108	106.081	106.391	100.316		118.2	129.743	128.879	128.519	131.485	130.016	133.127	124.907		112.165	192	168.144	162.844	149.704	138.579	132.199	130.363			-4.72725	112.029	6.02452	4	141.67	8.77527	9	126.812	3.98445	11	127.241
	-4.66047	123.598	132.225	132.713	129.406	132.836	129.601	132.22	136.414		93.8644	123.548	116.312	117.758	113.497	106.128	104.312	101.276		117.318	128.908	129	128.791	131.826	130.075	133.734	125.693		112.687	191.881	167.216	163.595	150.205	138.324	133.429	132.317			-4.66047	111.867	6.40379	4	141.573	8.76381	9	126.721	4.12937	11	128.145
	-4.5939	121.622	132.383	131.12	129.143	129.889	127.774	130.973	134.231		94.0042	122.93	116.591	116.393	113.14	105.688	105.646	99.7849		117.095	129.457	128.675	128.319	129.887	129.23	133.401	123.111		111.401	190.388	167.113	160.391	148.609	137.261	133.265	129.973			-4.5939	111.031	6.0484	4	140.752	8.6035	9	125.821	3.91461	11	126.746
	-4.5273	121.705	130.997	131.748	128.971	131.242	127.928	131.874	134.08		93.8365	121.877	116.312	116.186	112.851	105.091	105.382	99.9713		116.957	128.92	127.326	126.962	130.099	128.186	133.555	123.144		111.922	190.388	168.814	161.192	147.697	138.792	132.568	130.559			-4.5273	111.105	6.09285	4	140.715	8.77363	9	125.667	3.96332	11	126.742
	-4.46052	123.071	131.155	130.992	128.432	132.595	129.403	131.585	134.359		94.2558	121.06	117.132	116.376	113.751	104.997	105.01	100.574		117.201	128.587	127.423	126.053	128.642	127.4	132.711	124.256		109.976	191.821	168.351	160.991	147.241	138.324	132.609	131.379			-4.46052	111.126	6.22837	4	140.718	8.86201	9	125.625	3.935	11	126.859
	-4.39395	120.526	130.772	130.608	128.455	130.302	127.323	130.615	133		93.6408	120.044	116.207	115.892	113.344	106.238	104.39	100.359		115.831	127.264	127.531	125.64	129.934	127.001	131.901	123.01		111.018	189.731	166.134	159.94	147.971	137.473	132.486	129.465			-4.39395	110.254	5.86792	4	139.621	8.68718	9	125.327	3.89794	11	125.979
	-4.32713	120.153	130.434	131.132	129.67	130.049	126.904	130.776	134.614		94.3816	119.699	116.05	116.514	112.358	105.248	103.769	100.072		116.521	127.193	126.749	127.186	129.006	128.209	130.7	122.718		110.984	191.343	164.124	160.29	146.192	135.985	131.747	132.083			-4.32713	110.51	5.69707	4	139.642	8.74022	9	124.829	3.86709	11	126.365
	-4.2605	120.401	130.479	131.411	128.776	132.206	127.301	130.661	133.929		92.1034	121.006	114.687	115.806	112.783	104.997	104.746	99.5554		115.98	126.883	126.761	126.23	128.184	127.564	131.009	122.257		110.115	192.239	167.835	158.838	148.974	136.92	132.814	129.426			-4.2605	109.65	6.21661	4	139.909	8.96122	9	125.262	4.00218	11	125.902
	-4.19373	120.898	129.251	130.143	129.395	129.797	127.235	130.464	133.442		92.7184	119.662	116.172	115.892	113.599	103.331	103.754	99.6845		115.119	128.456	126.592	125.853	129.57	128.151	131.675	122.156		109.489	188.239	165.361	160.391	148.928	136.495	130.968	129.465			-4.19373	109.556	6.07658	4	139.285	8.57151	9	124.959	4.07553	11	125.751
	-4.12717	119.77	129.172	129.515	128.043	128.444	128.479	129.806	133.778		92.6765	120.879	115.875	117.205	112.273	103.708	103.707	99.6845		115.098	127.157	127.013	126.136	127.643	126.696	130.283	123.897		112.131	188.657	166.598	161.392	147.287	135.857	131.911	128.683			-4.12717	109.919	5.95864	4	139.605	8.65265	9	124.417	3.96013	11	125.592
	-4.0606	120.66	130.772	129.492	128.707	131.082	127.147	130.129	131.758		91.6422	120.516	114.949	114.838	112.035	105.123	102.497	99.6988		115.778	126.883	126.098	125.676	128.477	126.754	129.653	119.057		112.026	189.254	167.062	158.688	147.971	134.709	130.394	128.214			-4.0606	110.027	6.37789	4	139.161	8.74731	9	124.502	3.99757	11	124.457
	-3.99372	118.788	130.186	129.515	128.558	129.12	126.728	130.256	132.977		92.0475	120.116	114.548	115.236	110.862	103.913	102.885	99.6702		115.565	126.907	125.003	124.33	128.231	125.98	129.498	122.549		109.593	186.209	164.845	158.237	147.56	136.197	130.312	126.417			-3.99372	108.998	5.96263	4	138.422	8.41369	9	123.944	4.04435	11	124.707
	-3.92722	119.584	129.668	129.469	129.452	128.375	127.664	130.349	133.953		94.6052	119.644	115.089	115.253	111.27	104.337	102.59	99.0248		115.586	125.822	125.436	124.153	127.843	125.921	129.581	122.549		109.107	188.358	166.082	161.392	146.01	135.985	130.107	125.791			-3.92722	109.721	5.48141	4	138.975	8.76624	9	123.92	3.94763	11	124.659
	-3.8604	119.522	129.352	129.387	128.1	130.841	126.959	130.615	132.884		90.6359	119.063	114.478	115.184	112.205	104.463	102.714	98.6376		114.928	126.013	124.582	124.519	126.574	126.496	128.832	122.347		109.906	187.403	163.454	158.588	147.606	135.517	129.984	128.644			-3.8604	108.748	6.34861	4	138.102	8.5289	9	124.007	3.98108	11	124.805
	-3.7938	119.45	129.465	128.957	127.756	129.636	126.145	130.176	132.791		93.5849	119.789	114.024	114.562	110.692	104.211	103.009	98.6233		114.471	125.393	124.269	125.003	126.974	125.909	128.498	121.089		108.968	187.463	163.918	158.087	145.508	135.177	129.573	127.315			-3.7938	109.118	5.60279	4	137.962	8.57251	9	123.489	3.87811	11	124.247
	-3.72728	119.015	128.417	129.376	127.71	126.62	126.2	128.443	132.153		92.5646	118.482	114.635	114.251	111.559	103.755	103.118	98.3938		115.64	124.881	124.148	124.472	126.104	125.311	128.689	120.191		108.203	188.06	164.381	156.685	145.28	129.477	130.353	128.37			-3.72728	108.856	5.88118	4	137.685	8.64371	9	122.586	3.6825	11	123.988
	-3.66045	119.636	128.676	128.817	128.192	124.361	126.706	130.106	131.944		90.6639	119.39	113.762	113.508	110.93	103.913	102.652	99.5554		114.598	127.085	124.016	123.044	126.445	125.757	128.903	122.223		109.385	185.791	161.289	157.336	146.147	129.264	128.466	125.166			-3.66045	108.571	6.32513	4	137.295	8.34982	9	122.334	3.75332	11	124.015
	-3.59388	118.632	129.127	128.05	127.493	124.773	125.55	128.57	132.594		90.9294	118.7	115.176	115.322	110.267	104.415	102.714	99.1826		112.527	126.418	125.075	123.493	126.269	126.308	127.618	119.708		108.481	185.612	164.485	157.937	144.232	129.434	129.614	126.065			-3.59388	107.642	5.94881	4	137.87	8.40405	9	122.156	3.62872	11	123.707
	-3.52702	118.001	127.38	127.933	127.229	124.154	126.717	129.506	132.373		90.9154	118.21	113.674	114.268	111.032	104.353	102.078	98.4942		115.268	125.274	124.233	123.54	126.762	125.252	127.665	118.922		108.585	185.194	163.711	156.385	143.593	128.881	129.573	125.244			-3.52702	108.192	6.08906	4	136.892	8.44749	9	122.052	3.60109	11	123.379
	-3.4605	118.332	128.113	127.689	128.237	124.441	126.42	129.344	132.478		90.3704	119.372	114.478	114.977	110.777	102.53	102.637	98.7954		114.078	125.596	124.582	123.87	126.034	124.572	128.153	121.101		107.125	187.582	161.546	157.436	143.548	127.308	129.122	125.987			-3.4605	107.476	6.15202	4	137.421	8.47863	9	121.853	3.64697	11	123.694
	-3.39393	118.146	127.775	129.236	126.702	124.682	125.616	129.24	131.793		91.1251	118.137	113.832	113.802	112.103	103.724	102.482	99.0248		114.067	125.62	125.448	122.973	124.671	125.64	126.416	119.854		106.813	183.403	162.165	158.538	145.508	127.222	127.441	126.495			-3.39393	107.538	5.95168	4	136.945	8.29657	9	121.921	3.63709	11	123.238
	-3.3271	117.815	127.403	128.98	126.828	124.498	125.892	129.829	131.63		89.1125	118.5	114.495	114.648	110.658	103.378	102.606	99.0965		113.961	123.987	124.281	122.431	126.692	124.806	126.797	120.056		107.612	183.403	161.907	154.582	143.958	130.115	128.712	126.221			-3.3271	107.125	6.36195	4	136.434	8.12566	9	121.94	3.65762	11	123.394
	-2.27327	112.218	127.651	127.352	127.55	129.086	127.026	125.52	128.785		85.87	110.494	107.125	107.652	103.553	97.093	96.1843	92.2128		111.156	123.987	124.883	125.77	128.571	127.235	128.248	124.638		107.855	190.507	162.629	156.885	148.244	135.985	130.435	130.871			-2.27327	104.275	6.20486	4	134.92	9.63398	9	122.177	4.93879	11	123.493
	-2.21048	113.811	128.124	126.701	124.261	129.212	126.827	125.254	128.367		86.3452	108.297	106.34	106.115	103.417	95.9459	95.145	91.3524		110.295	124.643	122.8	124.59	128.301	127.775	128.082	120.932		106.291	188.896	163.505	156.785	148.336	135.091	131.829	126.925			-2.21048	104.186	6.14205	4	134.378	9.70441	9	121.266	4.98348	11	122.565
	-2.14778	115.229	126.648	128.073	124.822	127.492	126.948	126.895	128.449		84.7659	108.733	107.649	106.651	103.332	95.3803	95.2071	91.2233		111.878	124.75	124.208	125.876	127.984	127.564	129.712	118.596		106.222	187.104	163.608	155.984	147.697	133.348	128.876	127.12			-2.14778	104.524	6.84314	4	134.356	9.45341	9	121.118	4.93029	11	122.304
	-2.08487	115.001	126.625	126.026	123.757	128.512	126.673	124.988	126.986		85.5066	109.332	104.593	105.77	102.856	95.726	94.9124	91.295		111.836	123.749	123.823	124.224	128.266	126.379	127.451	121.112		106.708	185.313	161.392	155.934	147.697	134.241	129.04	128.292			-2.08487	104.763	6.64226	4	133.193	9.39259	9	120.972	4.95799	11	121.943
	-2.02195	112.208	126.085	126.038	123.825	125.886	125.033	124.307	127.415		84.5702	108.715	104.698	105.372	102.601	94.9717	95.2381	90.3772		110.869	122.867	121.753	123.233	127.162	125.71	126.94	120.382		106.291	186.328	160	155.383	146.01	131.093	128.056	127.354			-2.02195	103.485	6.43075	4	132.832	9.44775	9	119.71	4.74857	11	121.318
	-1.95923	114.111	126.806	125.201	124.777	128.742	124.56	126.571	126.986		84.5842	106.79	104.663	105.545	101.275	94.9717	94.7417	90.4919		111.007	124.404	122.126	123.221	126.985	124.513	126.238	118.855		105.909	185.552	160.979	152.979	144.596	133.305	130.066	125.557			-1.95923	103.903	6.65782	4	132.547	9.39764	9	119.936	4.84365	11	121.16
	-1.89628	112.311	128	126.154	124.605	129.006	126.662	126.548	128.309		83.4382	108.025	105.658	105.77	104.505	96.1974	95.0054	92.471		110.593	123.534	122.824	124.932	127.737	126.003	125.821	116.867		105.909	184.896	159.639	154.532	144.186	131.306	129.409	126.143			-1.89628	103.063	6.67996	4	132.912	9.23507	9	120.633	4.65016	11	121.446
	-1.83358	114.401	127.673	126.201	126.748	127.824	125.363	125.139	129.192		82.7952	108.66	105.641	105.061	102.431	95.2388	94.5556	90.5779		111.687	125.083	122.379	122.395	126.88	126.449	126.821	116.755		104.345	182.567	160.979	151.577	144.961	131.008	129.122	125.166			-1.83358	103.307	7.15957	4	132.605	9.00792	9	119.98	4.77464	11	121.153
	-1.77077	114.494	127.256	126.096	124.845	128.031	125.22	126.259	127.102		84.1649	109.386	105.484	107.151	102.499	96.1659	95.1761	91.1659		111.793	125.357	122.114	125.345	128.09	127.435	126.487	120.236		104.414	180.597	160.825	151.277	144.095	129.86	128.138	123.486			-1.77077	103.717	6.85654	4	132.603	8.73552	9	120.131	4.65332	11	121.289
	-1.70778	114.577	126.918	125.794	125.911	127.664	125.815	125.913	129.052		83.7177	109.641	104.698	105.303	102.584	95.3174	95.2536	90.9938		110.848	124.571	123.607	123.363	127.373	125.64	126.606	118.394		105.388	183.522	157.835	151.928	145.372	129.817	127.605	121.141			-1.70778	103.633	6.90122	4	132.246	8.97233	9	120.189	4.73939	11	120.668
	-1.64493	113.863	127.02	125.619	125.808	127.801	126.354	125.081	127.531		85.7862	108.715	106.706	106.271	101.105	95.2703	94.8813	91.252		110.869	124.452	123.33	124.224	128.466	125.593	125.845	118.36		104.275	182.687	157.784	151.728	143.502	130.583	126.743	120.32			-1.64493	103.698	6.29761	4	132.331	8.81018	9	120.12	4.76663	11	120.091
	-1.58203	112.053	126.31	126.108	124.845	128.145	125.705	124.515	128.367		85.9679	108.569	104.68	105.234	100.833	94.2018	93.6094	91.0082		111.666	123.475	122.331	123.658	126.163	125.546	126.011	119.483		104.623	182.328	158.299	151.027	142.18	128.754	125.923	120.789			-1.58203	103.577	6.11313	4	131.781	8.92695	9	119.129	4.73745	11	120.205
	-1.51933	112.394	126.749	126.829	124.169	127.205	125.176	125.531	127.264		85.0035	108.551	104.68	106.098	101.853	94.8931	94.6952	89.3733		110.731	122.712	121.452	123.363	126.351	126.684	126.88	118.428		104.553	182.866	156.598	152.879	142.453	129.519	121.37	122.157			-1.51933	103.17	6.28614	4	131.996	8.92564	9	119.194	4.60973	11	119.711
	-1.45663	112.384	127.628	127.108	124.639	128.065	124.824	124.896	127.148		82.8372	107.389	105.641	105.027	101.53	94.6574	93.8731	90.3341		109.679	124.666	122.499	122.549	126.245	126.578	127.475	117.316		106.361	181.373	158.454	151.427	144.277	128.371	123.175	122.626			-1.45663	102.815	6.77225	4	132.079	8.85039	9	119.23	4.7487	11	119.944
	-1.39402	112.528	126.749	125.677	124.421	126.804	125.583	124.445	126.01		83.2844	108.969	105.134	104.647	100.408	94.4375	93.1751	89.359		110.412	123.844	122.018	123.811	125.623	125.98	126.226	117.372		103.545	182.806	158.711	150.526	143.32	127.52	123.831	120.438			-1.39402	102.443	6.66766	4	131.896	8.95382	9	118.829	4.75716	11	119.208
	-1.33135	114.339	125.758	125.887	123.906	127.09	123.734	125.404	126.312		85.9818	106.663	104.418	104.267	100.85	94.7046	93.7335	90.1334		109.987	122.939	121.693	122.431	125.435	125.522	125.452	118.439		104.97	180.776	158.351	151.027	142.18	128.243	122.806	120.516			-1.33135	103.82	6.24638	4	131.12	8.94334	9	118.545	4.62297	11	119.323
	-1.26843	112.839	126.963	126.084	123.573	126.677	125	123.394	126.115		84.4584	108.061	103.353	103.679	100.918	94.1703	93.4078	89.3876		110.848	122.224	122.066	121.416	125.693	124.126	126.523	119.281		103.441	180.119	155.979	151.427	141.769	130.115	123.093	119.891			-1.26843	102.897	6.47002	4	130.877	8.82568	9	118.619	4.68528	11	118.976
	-1.20572	112.901	125.51	125.259	124.226	126.62	124.901	123.937	125.848		82.6834	108.297	103.947	104.059	99.0481	94.2489	92.8959	89.6458		111.305	122.986	121.524	121.605	125.811	125.029	126.285	116.844		103.511	179.94	158.351	149.174	140.173	129.519	122.354	119.304			-1.20572	102.6	6.94849	4	130.836	8.79841	9	118.234	4.69465	11	118.656
	-1.14305	115.239	125.679	124.561	122.519	125.702	124.163	123.775	126.417		82.9909	107.716	103.528	104.336	100.238	93.7304	93.3768	89.4307		110.402	121.532	120.368	121.876	124.659	123.257	124.334	118.439		103.754	181.194	158.711	149.124	141.952	127.733	121.616	120.399			-1.14305	103.096	7.10323	4	130.709	8.96158	9	117.847	4.63355	11	118.458
	-1.08017	114.535	124.98	124.91	122.164	126.07	124.009	124.469	125.569		81.6352	107.026	105.204	103.956	100.714	93.6518	93.1596	89.9756		109.371	121.461	120.441	121.51	123.543	124.806	125	120.045		103.024	180.06	157.526	149.675	140.948	128.626	124.118	120.047			-1.08017	102.141	7.22936	4	130.533	8.81375	9	117.712	4.58743	11	119.254
	0	100	100	100	100	100	100	100	100		100	100	100	100	100	100	100	100		100	100	100	100	100	100	100	100		100	100	100	100	100	100	100	100			0	100	0	4	100	0	9	100	0	11	100
	0.0626833	102.504	99.4141	97.7439	98.9457	98.7613	98.8001	98.1747	99.4659		102.194	96.8591	97.0311	98.7563	97.2293	97.423	97.7509	95.081		98.4807	98.439	99.5185	99.5044	99.8825	100.082	99.7382	96.1707		99.5481	91.6418	94.1237	95.4932	96.3064	96.8949	96.8417	98.476			0.062683	100.682	0.988973	4	96.6114	0.82875	9	98.2743	0.36279	11	98.0038
	0.125583	100.621	97.938	98.6743	97.7768	97.6603	96.6535	97.0772	98.1189		101.3	91.8119	94.0098	95.3187	94.5606	94.6732	95.3312	95.0954		97.5669	98.5701	98.6156	99.292	98.5197	100.833	99.881	95.699		98.1578	86.5075	89.4845	91.5373	92.5673	93.322	95.4061	98.2024			0.125583	99.4113	0.912963	4	93.7613	1.42813	9	96.2702	0.692825	11	97.5391
	0.18825	102.586	96.3155	96.3484	96.4474	95.9628	95.7177	96.6266	96.7023		98.5325	87.3638	91.5997	92.6239	91.6879	93.5261	93.6249	93.3314		97.6413	98.7965	98.1461	99.3628	98.6255	98.9791	99.7977	94.2617		99.2006	83.1642	86.134	89.2839	89.7401	91.493	93.5193	93.8648			0.18825	99.4902	1.08035	4	91.2922	1.75245	9	94.9395	0.956188	11	95.8854
	0.251133	101.842	95.3127	94.5924	95.1066	94.9077	94.2206	94.5356	95.7269		101.901	85.3486	87.583	88.8582	89.8351	91.1062	92.7253	91.1229		97.5457	97.1282	97.7368	98.5251	97.3332	98.0052	97.7749	94.8681		98.4359	79.5821	82.1134	84.7271	87.2321	88.6431	93.2322	93.6303			0.251133	99.931	1.13487	4	88.3606	2.05228	9	93.3974	1.1501	11	94.862
	0.314117	100.838	94.107	95.011	95.141	95.5614	93.1198	94.4316	95.2624		101.649	81.2818	86.1509	87.3899	89.3592	89.0949	90.957	90.664		97.8538	96.8422	96.4969	96.6254	97.5329	96.8552	97.5488	92.1842		98.3664	75.403	78.1443	82.4737	83.6297	86.5164	90.2379	92.4971			0.314117	99.6768	0.925534	4	86.3115	2.56651	9	92.185	1.38921	11	93.7101
	0.377017	101.241	93.6113	94.2784	94.8545	94.0131	93.0757	93.5767	94.6006		98.211	79.3573	83.7583	85.5934	86.9794	88.2778	89.8557	90.7357		98.5125	96.6277	96.9303	97.1091	97.3919	97.7587	96.7991	91.1173		96.2113	73.4925	75.9278	78.668	81.8513	85.4105	89.5816	90.465			0.377017	98.5441	1.03399	4	84.5905	2.84432	9	91.4318	1.59364	11	93.0794
	0.4399	100.103	92.8563	93.569	92.7344	92.6941	93.1968	93.4843	92.8936		99.399	76.0349	82.4659	83.6414	84.5997	88.0735	89.2818	89.2299		96.3345	96.4013	97.1831	96.708	97.2744	97.5123	96.3113	92.7344		98.2273	69.2537	73.299	76.8152	79.0242	83.071	86.4233	90.2696			0.4399	98.5161	0.823726	4	82.7041	3.24506	9	90.3492	1.84636	11	92.3573
	0.502817	100.424	92.1915	93.2318	92.0009	92.2239	91.7768	92.225	93.2072		98.7841	74.6914	79.6717	81.5167	83.8518	86.3922	88.4442	89.1725		97.0994	96.592	95.2811	97.0029	96.6635	97.0664	96.2756	90.0505		96.0028	67.5821	70.4124	73.7106	76.425	81.1144	85.3158	87.417			0.502817	98.0776	0.968989	4	81.0667	3.54542	9	89.1979	2.00643	11	91.3413
	0.565533	97.8378	91.7296	92.5922	92.2072	91.5931	90.9621	91.5896	91.4306		99.9441	71.841	77.9602	80.152	82.7299	86.3608	87.2499	87.7814		97.5882	96.7231	95.5098	95.7758	96.7458	96.597	96.0376	90.4885		96.837	65.0746	69.0206	72.8092	74.5554	79.9234	84.7006	88.1204			0.565533	98.0518	0.665665	4	79.7669	3.80258	9	88.5103	2.14663	11	90.8432
	0.628433	98.7068	90.7606	91.3246	91.7717	91.9142	90.786	90.7348	91.8718		98.6303	70.679	76.1439	78.3382	80.9451	83.2181	84.9698	87.0214		96.4938	95.7221	95.6422	96.0118	96.4403	96.292	96.347	89.7473		97.3236	64.597	67.3196	70.1052	73.4154	78.1795	80.927	86.2055			0.628433	97.7886	0.535743	4	78.3322	3.84898	9	87.5722	2.37429	11	89.8933
	0.691317	97.5585	90.7493	90.2896	90.4882	90.4003	89.41	90.7463	90.908		98.4906	68.1917	74.0657	77.5436	79.3473	83.5952	84.9077	86.4908		97.2057	96.735	94.3782	95.646	95.1363	95.7874	94.3241	90.9714		96.5242	61.791	65.0515	68.8533	71.2722	76.0102	81.8294	84.916			0.691317	97.4447	0.4094	4	77.0301	4.21976	9	86.4174	2.45666	11	89.4967
	0.7542	98.2309	89.1155	88.4056	89.984	89.1387	88.7054	89.1289	89.7701		101.244	66.4851	73.4893	74.7798	77.3925	81.631	83.3256	86.0749		95.697	96.0319	93.9328	93.8171	94.9131	95.5292	94.8358	89.7473		96.7675	61.6716	62.8351	68.0521	70.041	74.8618	81.009	83.0403			0.7542	97.9848	1.2041	4	75.6518	4.19361	9	85.2494	2.53951	11	88.6419
	0.816967	96.7929	88.6986	88.2079	88.6775	88.8175	88.9366	87.4769	88.8528		99.7345	64.5606	71.8477	73.1387	76.1856	80.3268	83.3101	84.7698		97.8751	93.9466	93.5115	93.9233	94.3727	94.4614	93.4079	88.9163		97.0803	59.4627	61.4948	65.8988	68.7187	74.9468	80.3117	83.1966			0.816967	97.8707	0.662069	4	74.1396	4.31957	9	84.7025	2.61303	11	87.6742
	0.879617	98.6965	87.3577	87.6265	87.394	88.5996	88.3862	88.2509	88.9921		98.9518	62.6906	70.014	71.7395	75.4377	78.0798	82.2708	83.7946		96.7382	93.7798	93.2948	93.4277	93.2448	94.79	93.7887	89.7136		97.1846	57.4328	61.9072	63.1948	68.2171	74.2663	78.7941	82.4932			0.879617	97.8928	0.547873	4	72.8603	4.45661	9	83.8744	2.64177	11	87.5771
	0.9425	98.6965	86.738	86.1147	86.7866	86.0993	86.3166	87.5462	87.1923		98.9658	62.037	68.1278	70.7894	73.2959	78.0641	81.6194	84.0098		96.2813	93.0291	91.9706	92.8732	92.8102	93.6635	93.6697	89.2532		96.0723	58.209	59.433	62.7942	65.8459	73.4581	77.4815	82.2587			0.9425	97.504	0.769381	4	71.9191	4.42089	9	82.6491	2.71951	11	86.8844
	1.0055	98.9241	86.3099	85.6262	86.7408	85.9388	86.1515	86.5065	87.0181		98.253	59.4771	67.1498	69.4939	72.531	77.3099	79.696	82.3319		95.8245	93.3031	92.1512	92.3304	92.9511	93.9099	93.2532	87.1645		97.6364	56.5373	59.1753	62.2434	64.8883	71.3313	76.6202	80.6956			1.0055	97.6595	0.66578	4	71.0351	4.59662	9	82.0018	2.87388	11	85.9375
	1.06835	98.8516	84.9465	85.1029	85.3885	85.4112	85.3369	86.5296	86.2866		97.5681	58.4786	65.84	68.2674	71.5111	76.1157	79.2927	81.8299		96.2388	92.3856	91.2965	91.5398	92.5987	92.314	92.1942	86.9848		97.0455	55.6418	58.4021	60.9915	63.5659	70.0553	76.087	79.4842			1.06835	97.426	0.548236	4	70.0063	4.60598	9	81.1011	2.93814	11	85.2138
	1.1313	99.4827	83.5493	83.9981	84.3342	84.3101	84.4562	85.2241	86.066		99.3711	57.008	64.1285	67.11	70.3893	74.7172	78.5792	81.9016		95.7607	92.1235	91.5373	91.5988	92.2227	92.537	92.4798	88.2426		95.7942	53.9104	55.6186	59.339	62.7907	69.8001	75.4307	80.891			1.1313	97.6022	1.05376	4	68.5317	4.77341	9	80.4305	3.00713	11	85.3466
	1.19418	97.2584	83.5718	83.6841	83.2111	84.0119	84.4342	85.1317	85.9731		98.2949	56.1547	62.7314	65.5554	68.8424	74.4343	77.3228	81.371		95.102	91.1106	90.6464	92.7906	91.8351	92.0441	91.504	85.2442		96.1418	53.194	56.0309	57.5363	61.4227	68.0136	74.6514	80.6956			1.19418	96.6993	0.690454	4	67.7299	4.81307	9	79.7241	3.18187	11	84.5769
	1.2569	96.7101	82.4338	83.3353	83.085	83.2091	83.6746	84.4154	85.0325		99.1474	55.3558	62.417	64.7608	67.9925	73.9158	76.8419	80.2381		96.1326	90.7173	90.2853	91.0324	91.1654	91.3401	90.6711	86.5918		96.976	52.2985	54.8969	57.3861	60.3739	68.439	73.9541	79.2497			1.2569	97.2415	0.659239	4	67.0668	4.83644	9	79.0923	3.14272	11	83.9366
	1.31957	98.3964	81.5437	81.5327	83.0048	82.7044	83.0031	84.5079	84.8119		98.9378	54.0487	61.4041	63.8452	66.8027	72.5644	76.4542	80.7687		94.8045	91.2059	89.6954	90.4071	91.6823	90.2136	90.0524	86.3897		95.9333	51.9403	53.866	56.2844	59.0059	66.9928	72.7235	77.3349			1.31957	97.018	0.985817	4	66.1857	4.89586	9	78.3925	3.28591	11	83.3503
[truncated: 601 more rows]
[truncated: 2 more columns]

## Sheet: Fig3G_run-Kd67
	Data	Fit
molar ratio	kcal/(mol*injectant)	kcal/(mol*injectant)
0.05655		0.667707
[truncated: 20 more rows]

## Sheet: Fig3G_run-Kd171
	Data	Fit
[truncated: 22 more rows]

## Sheet: Fig3H_run-Kd360
	Data	Fit
[truncated: 21 more rows]

[truncated: 1 more sheets: Fig3H_run-Kd495]
