# Supplementary material for: Structural and functional properties of a magnesium transporter of the SLC11/NRAMP family
Source: eLife journal article supplement (doi:10.7554/elife.74589), 2022-01-10
Supplement: supp [file Figure4.xlsx]

## Sheet: Fig4A
Elen
lipid to protein ratio 50
Mn transport
with 2 mM Mg
NORMALIZED DATA
		Mn concentrations (uM)
	Time (min)	0	1	5	10	25	50	200	400	0	1	5	10	25	50	200	400	0	1	5	10	25	50	200	400	0	1	5	10	25	50	200	400	0	1	5	10	25	50	400	0	1	5	10	25	50	200	400	0
	-6.09367	124.282	123.948	136.084	148.485	139.706	156.845	168.2	172.436	119.689	120.169	136.511	140.792	151.476	160.866	162.1	181.884	121.786	123.212	141.887	144.604	146.777	151.396	164.241	170.875	129.33	125	143.947	153.808	163.89	167.051	174.511	185.65	128.939	128.436	135.644	137.06	150.638	157.489	160.553	110.698	135.791	215.666	212.906	248.478	251.711	300.047	305.848	109.687
	-6.0267	119.779	120.222	133.463	145.13	136.804	148.065	164.165	169.811	115.585	119.82	137.566	140.275	147.956	158.213	162.998	171.178	117.095	121.007	138.73	140.63	144.833	153.591	163.415	169.208	128.071	124.025	142.389	146.025	161.954	167.235	171.981	180.767	124.75	126.585	131.642	134.715	144.986	151.878	159.146	107.104	132.049	211.933	212.828	239.303	251.967	287.624	298.231	105.44
	-5.96002	118.702	119.71	134.919	140.007	138.238	151.6	162.389	168.376	115.835	117.841	134.96	136.833	145.42	156.73	165.691	170.193	118.988	120.977	137.067	140.767	147.461	150.354	158.537	166.667	125.111	123.642	141.35	147.866	161.684	164.194	168.783	178.874	125.519	126.979	132.962	136.307	146.992	151.878	155.119	106.226	134.699	205.304	210.872	242.388	253.849	275.059	293.268	110.632
	-5.8931	115.801	120.762	129.288	134.055	134.38	151.19	160.775	164.766	113.533	116.705	133.443	135.697	145.42	156.223	159.329	171.563	118.169	117.729	137.475	139.363	142.06	147.674	157.671	164.375	123.75	123.851	139.712	146.109	156.821	162.12	164.916	177.877	120.6	125.758	130.817	133.417	146.399	147.979	154.682	103.698	129.955	200.209	211.029	234.375	246.578	270.635	284.373	105.341
	-5.82643	113.84	116.752	129.029	136.833	133.698	147.693	153.43	161.485	112.978	115.047	135.092	134.458	147.464	156.067	159.173	171.135	113.394	119.428	134.725	137.41	140.835	143.841	158.222	164.458	122.797	121.553	141.111	142.092	156.596	161.751	165.489	170.852	121.483	122.962	126.568	134.296	143.345	151.165	150.995	101.084	128.396	197.348	207.783	233.133	244.696	268.094	279.509	102.77
	-5.76003	112.265	117.861	125.275	133.622	135.678	146.652	155.287	164.807	112.257	115.396	133.608	132.083	143.603	151.736	155.738	167.452	112.433	118.445	132.858	135.629	140.331	140.938	152.911	156.875	121.742	120.265	136.556	140.544	154.615	159.309	165.155	176.283	122.521	121.583	129.332	132.831	142.799	150.452	150.946	101.995	125.1	193.859	207.391	234.095	240.89	266.729	266.634	100.879
	-5.69342	115	114.619	126.408	132.468	130.01	144.792	156.376	161.321	111.73	112.922	130.277	130.568	141.938	149.044	157.611	165.139	113.394	116.985	133.537	136.862	140.151	144.138	155.114	157.958	121.232	118.698	135.557	137.49	154.525	160.691	164.296	165.022	122.367	121.82	125.413	128.518	140.793	146.457	152.499	100.396	125.902	196.581	203.872	225.08	243.499	269.318	268.649	102.272
	-5.62643	112.238	113.538	125.987	130.014	130.01	142.857	151.735	156.686	109.512	109.459	130.112	132.117	139.818	149.278	155.074	165.525	116.756	116.389	127.699	134.978	139.755	141.757	150.983	156.958	117.421	119.29	134.798	140.628	153.67	156.406	160.43	164.126	118.793	122.647	125.908	130.109	139.015	144.841	150.267	99.2432	125.412	194.103	202.464	230.97	233.576	266.212	269.975	100.979
	-5.55982	111.05	112.144	123.042	130.916	129.669	142.113	152.098	164.192	109.179	111.088	127.672	127.78	139.213	150.488	151.717	168.908	114.524	117.968	135.2	135.526	136.01	139.598	148.072	156.625	118.272	118.942	132.281	137.782	149.527	154.332	163.103	160.937	117.064	113.115	125.536	126.801	137.329	144.936	147.065	99.312	125.122	186.567	203.402	226.082	236.056	267.341	261.72	96.9315
	-5.49315	107.238	112.827	122.557	129.221	128.303	143.08	150.202	157.957	106.6	107.858	127.836	128.847	139.326	143.699	153.708	165.31	113.704	113.856	133.096	132.306	135.326	138.37	149.449	158	116.979	117.653	131.402	137.448	146.691	153.041	154.702	158.445	117.025	116.266	124.546	127.219	139.243	141.227	144.881	97.3684	126.347	183.706	205.905	225.24	234.602	261.694	266.83	94.8084
	-5.42645	110.083	110.353	123.463	128.716	126.221	141.034	153.511	152.748	107.571	107.654	125.33	126.54	135.92	139.953	148.868	163.897	110.059	113.975	126.748	129.359	136.118	137.551	148.033	157	121.368	117.479	130.723	135.9	148.041	152.12	155.752	159.143	114.105	115.833	121.741	125.544	137.238	139.705	148.666	96.7492	123.808	187.125	207.665	226.082	234.175	262.071	270.418	96.1685
	-5.36003	106.602	111.974	120	126.623	123.626	137.165	150.928	154.84	107.46	107.072	123.021	125.68	137.737	141.007	151.093	163.812	111.5	111.085	127.393	133.128	132.517	138.407	142.526	151.292	111.977	113.44	130.443	129.749	144.755	144.793	151.79	158.396	113.566	114.1	120.173	124.037	136.964	134.665	142.892	97.764	125.523	183.043	204.458	224.319	235.885	259.482	268.354	96.6661
	-5.29315	106.934	109.642	118.997	127.67	125.401	135.528	149.839	152.994	107.182	106.723	125.594	125.921	135.92	140.577	150.039	159.786	112.433	111.442	121.656	129.736	132.913	132.639	141.267	154.292	112.589	113.684	129.245	133.556	142.683	149.124	149.308	160.688	112.952	112.21	118.193	121.189	133.82	139.848	142.795	98.0736	124.833	184.194	202.581	220.633	234.003	262.353	264.963	95.2894
	-5.22648	106.934	109.016	117.896	127.237	123.182	136.124	148.507	147.293	105.214	106.752	124.571	125.37	136.942	142.84	148.595	157.859	106.923	109.684	125.051	128.606	132.301	133.532	145.083	150	114.223	114.763	125.809	130.921	141.468	143.134	148.115	155.705	109.723	114.888	115.47	122.613	130.948	137.565	138.719	93.5845	123.408	180.565	202.698	223.157	234.731	264.329	265.111	92.7019
	-5.15978	105.635	109.556	119.256	126.082	122.943	137.946	146.368	151.887	103.799	107.712	124.175	122.616	134.86	138.002	147.073	160.171	107.545	108.552	125.153	125.694	130.284	133.867	143.942	150.667	112.589	114.659	126.288	130.711	142.278	146.544	147.112	152.217	109.301	110.752	115.099	122.069	134.093	133.524	136.293	91.8129	121.804	183.706	202.542	224.559	230.111	258.353	261.867	95.7207
	-5.09338	105.718	107.708	121.197	124.351	125.879	135.379	147.014	149.754	105.435	102.474	122.197	120.895	130.961	139.056	146.292	155.246	108.025	109.356	120.978	128.708	126.251	129.996	143.43	149.167	109.595	112.918	124.491	127.531	139.487	142.396	145.776	156.153	108.724	108.429	116.048	118.76	127.712	132.192	134.74	92.6901	121.559	182.38	201.056	221.675	231.223	257.694	265.602	93.5644
	-5.0265	104.586	108.39	119.288	125.397	122.841	134.784	144.915	148.687	102.856	106.083	120.976	123.718	135.276	139.719	148.048	156.188	108.533	109.714	123.15	125.146	126.755	127.503	145.161	150.375	113.304	111.072	126.249	128.619	132.733	142.765	145.585	154.709	106.764	109.059	114.398	118.97	122.06	129.529	137.409	92.9825	119.51	178.402	199.374	217.708	229.085	257.553	263.833	94.4767
	-4.95982	103.508	106.94	117.443	123.196	121.236	133.333	142.817	150.369	102.302	102.648	122.164	124.028	130.469	136.988	144.418	159.229	105.312	106.406	122.845	123.535	127.188	132.601	143.155	143	111.671	112.326	123.012	131.213	136.47	143.641	139.141	153.513	104.958	106.971	115.842	118.258	129.125	131.431	134.255	92.3977	117.216	182.798	196.167	216.466	225.192	254.588	259.263	93.7303
	-4.89312	105.773	105.688	117.929	125.649	123.66	129.613	142.01	142.904	102.801	103.405	119.789	123.752	130.053	134.686	144.34	153.062	107.94	104.917	122.437	121.137	125.099	127.838	140.952	144.75	109.833	111.142	126.688	125.021	138.361	141.429	145.919	157.25	108.148	109.61	115.842	115.117	128.715	129.006	134.837	90.5917	120.089	177.32	198.592	216.146	226.262	252.235	260.639	96.069
	-4.82647	103.37	106.428	117.702	123.196	119.973	134.263	141.404	149.754	99.3067	102.212	117.81	123.787	129.334	133.008	143.56	158.501	102.091	105.989	119.484	122.371	125.855	131.001	139.103	145.333	108.166	108.531	121.894	125.021	131.968	136.083	147.446	152.815	105.457	105.238	111.097	114.866	123.929	128.768	135.129	89.8349	117.283	186.427	195.307	215.986	225.364	253.882	261.72	93.5976
	-4.7598	101.575	105.006	116.505	121.645	120.587	129.613	141.687	147.334	102.219	100.349	118.569	121.515	128.955	136.247	140.242	155.675	105.651	105.989	117.176	122.748	127.152	127.912	136.231	143.958	112.113	108.391	123.612	129.665	135.164	137.419	141.241	151.021	104.766	104.923	114.109	115.662	123.519	127.58	130.762	91.4861	117.906	176.308	197.341	213.381	224.508	244.565	262.555	91.9887
	-4.69338	103.011	105.546	115.34	121.392	120.143	129.948	141.969	145.611	102.884	103.609	117.81	121.687	127.668	134.803	136.768	151.52	107.884	106.555	117.549	120.555	123.875	127.168	136.467	139.333	108.2	108.74	123.412	122.008	135.975	140.461	137.947	150.424	104.458	107.286	110.149	114.698	124.795	127.057	130.665	90.3853	120.089	181.019	195.503	212.059	224.936	246.871	256.118	93.7966
	-4.62645	103.177	104.067	116.828	124.17	120.246	128.534	139.871	145.078	101.137	100.262	117.381	117.728	124.83	135.778	139.422	154.218	103.419	104.738	115.716	120.761	124.235	125.94	137.333	143.917	107.86	107.904	121.934	125.188	129.626	138.387	143.771	150.274	104.189	105.75	111.922	113.149	125.798	126.914	130.568	91.4345	118.886	181.891	197.302	208.694	225.364	249.082	262.408	92.6356
	-4.55978	99.6961	105.802	115.243	118.795	120.143	130.915	140.759	145.119	99.5286	100.437	114.38	119.656	125.889	134.53	139.071	147.88	102.826	104.35	116.768	121.96	119.698	124.712	136.9	142.125	106.125	108.008	119.577	124.686	132.868	137.972	139.57	146.388	102.844	103.19	111.922	112.312	122.926	126.914	131.975	92.2945	118.174	180.67	196.363	213.862	221.215	247.247	262.457	92.138
	-4.49313	102.735	103.811	114.401	118.975	119.563	126.749	138.136	142.494	96.8109	102.561	115.172	117.108	126.911	133.984	139.969	152.034	104.38	104.708	115.105	120.144	122.794	122.665	135.13	138.792	110.31	107.486	121.254	124.351	130.527	134.654	140.43	150.075	104.112	106.302	111.922	111.307	121.513	124.727	125.764	88.3041	118.218	177.111	186.82	210.697	220.958	250.635	259.803	93.1829
	-4.4265	103.26	103.555	115.016	121.284	118.983	126.19	137.288	143.765	97.2268	99.7381	114.545	119.725	125.738	135.232	137.119	153.919	100.565	101.728	115.954	119.082	122.002	124.451	134.186	140.167	102.416	106.755	120.176	121.674	131.652	138.802	140.334	149.028	103.805	103.663	110.726	109.506	121.376	123.918	133.382	90.0069	121.069	178.821	192.491	209.776	218.734	248.659	256.806	93.9293
	-4.3598	100.718	104.437	114.984	118.723	116.388	127.939	139.709	143.519	97.6705	99.3888	113.687	118.692	122.559	134.179	139.11	149.336	103.899	104.797	114.766	115.176	118.221	124.488	129.937	144	105.376	106.407	120.296	122.218	130.527	137.143	143.389	145.192	103.305	103.348	108.292	114.154	122.47	123.776	126.249	90.9529	116.971	175.82	192.804	216.747	221.3	249.882	256.462	91.4414
	-4.29313	100.138	102.19	112.265	119.084	115.432	128.571	139.185	142.412	98.8907	99.8836	112.533	117.005	123.543	132.072	136.69	147.366	101.639	105.513	113.747	116.924	119.121	120.581	135.405	141.958	103.811	105.153	119.577	123.054	129.311	136.59	142.578	147.434	102.037	105.829	107.715	112.27	120.966	121.921	130.422	91.8645	117.394	175.157	191.24	213.542	218.092	247.765	257.936	91.6238
	-4.22647	100.691	103.299	111.812	118.11	116.695	127.009	138.983	142.617	97.0327	98.865	113.621	115.8	124.83	134.14	138.525	150.278	99.7739	101.788	113.204	115.827	116.421	123.521	134.815	144.375	103.471	105.71	120.575	122.51	131.112	136.544	140.859	149.576	100.269	103.427	111.056	112.647	120.1	121.921	127.462	88.5449	116.013	177.809	195.542	207.933	219.547	244.188	260.983	91.2755
	-4.15953	100.967	101.763	111.909	120.527	118.846	124.591	141.283	141.222	96.5058	99.156	114.347	115.009	121.461	129.341	135.519	149.807	97.2591	103.188	113.408	118.157	120.346	123.297	133.792	141.833	100.783	104.596	118.777	120.753	130.707	136.083	140.716	148.979	103.19	102.718	107.632	110.302	123.017	125.012	128.53	88.9233	119.599	178.751	189.011	212.3	216.467	245.506	258.378	91.5741
	-4.0929	100.47	104.352	112.298	121.681	120.212	125.558	138.781	141.509	97.3655	100.058	113.588	117.246	123.316	133.203	136.3	145.739	99.6327	104.052	113.17	116.581	121.426	122.293	133.32	138.292	107.077	104.561	118.538	123.975	131.202	136.774	136.277	146.786	103.42	102.678	109.035	111.558	121.194	121.398	122.271	90.2477	115.546	172.994	195.698	211.739	220.274	242.871	256.56	91.4414
	-4.02622	98.8122	103.953	111.974	116.667	115.295	126.302	136.885	143.15	95.6739	98.8068	111.873	116.936	122.256	129.887	133.489	144.625	101.243	101.311	112.797	116.547	120.418	121.064	131.039	135.708	101.123	103.099	115.861	122.343	130.572	135.253	141.575	146.986	99.731	102.284	107.426	111.474	120.693	121.208	126.589	88.9405	115.256	177.46	189.988	208.213	217.964	247.294	251.057	90.1808
	-3.95978	98.3149	101.081	107.832	118.182	116.934	123.847	134.06	140.074	97.726	98.5739	112.302	117.349	125.927	130.394	135.558	149.55	97.9373	101.043	114.426	117.232	118.941	119.352	132.219	137.5	99.4556	104.492	119.257	123.808	131.968	133.779	137.9	147.384	100.038	101.891	108.333	107.412	118.642	121.065	126.104	88.5105	115.033	179.484	190.184	208.213	218.392	244.471	254.054	90.8277
	-3.89317	99.2818	101.024	111.78	116.847	115.637	128.609	134.786	143.724	93.8159	96.7404	109.268	114.114	121.688	129.107	133.724	147.709	97.8808	100.089	114.664	118.979	119.157	120.06	132.376	138.375	105.24	104.805	116.34	122.971	127.015	135.438	137.566	145.69	102.037	102.875	106.559	110.05	122.562	120.352	123.532	87.6161	115.679	171.947	189.91	211.498	220.573	239.2	259.656	90.0647
	-3.8262	98.5635	100.995	110.518	117.532	116.832	127.641	135.27	138.474	93.5108	96.3038	111.873	115.938	121.688	130.433	132.24	140.343	99.124	102.801	116.565	113.189	118.545	120.543	132.494	136.375	100.851	104.352	114.982	121.757	128.951	134.839	136.802	145.59	100.192	102.403	106.559	109.548	117.183	118.783	125.619	86.9109	116.214	172.61	186.234	210.938	217.879	244.988	255.872	89.3349
	-3.7598	100.138	101.337	112.104	118.543	117.685	126.153	135.634	139.664	94.5369	101.135	112.467	118.244	122.937	130.121	133.333	144.24	99.3501	100.596	113.136	116.65	120.562	121.139	133.163	139.5	101.089	104.492	114.902	121.883	129.401	132.811	139.427	145.142	99.2698	100.827	105.982	110.595	118.232	121.113	124.6	89.0093	114.098	171.354	190.849	207.893	217.793	249.129	254.201	88.6382
	-3.69313	98.7293	101.507	109.612	118.759	112.701	128.72	134.383	138.228	94.4537	99.156	112.17	118.485	124.565	129.185	135.988	149.293	95.3942	100.089	109.674	116.067	115.412	120.618	128.993	136.458	104.389	106.198	115.382	120.126	129.536	133.963	135.561	145.491	99.6157	100.63	107.591	107.035	117.411	118.069	126.541	87.0657	115.657	180.321	190.536	208.213	216.724	241.506	255.381	90.2969
	-3.6262	99.2541	99.3174	111.65	116.739	114.066	122.47	134.504	139.951	93.3444	99.156	110.521	115.559	121.84	129.809	132.67	145.953	94.2639	100.983	112.39	113.875	117.645	118.124	131.275	138.125	102.178	105.084	116.78	121.423	128.186	137.465	138.138	146.338	100.538	100.512	107.838	107.58	116.135	119.971	123.096	88.4761	114.187	174.738	193.743	205.449	214.243	246.165	258.182	93.382
	-3.5598	98.6464	100.825	110	116.883	116.32	122.619	134.463	142.371	95.4243	97.759	111.181	117.694	123.089	130.784	135.207	141.199	97.1461	100.685	109.844	112.402	117.465	120.134	130.37	136.875	102.892	104.944	115.781	121.172	129.446	133.226	136.372	143.647	101.922	103.387	107.673	107.119	118.186	122.825	125.716	88.5965	115.501	173.168	188.776	206.33	209.581	236.282	253.022	88.5056
	-3.49287	97.3204	99.5734	111.327	118.723	116.934	122.731	132.405	137.326	97.3655	96.362	110.587	112.668	120.742	126.844	134.738	141.499	98.0503	99.6126	108.147	113.292	119.085	117.715	130.803	137.083	101.769	103.412	117.779	120.628	127.825	132.673	136.611	143.548	99.3467	102.206	106.312	109.296	115.998	122.397	121.883	88.1493	114.967	173.726	187.681	210.337	216.51	238.588	256.511	89.7827
	-3.42647	97.9834	98.9477	108.738	116.775	113.691	123.847	134.584	136.71	97.6705	96.8568	110.521	116.454	119.833	129.653	132.982	140.171	99.4914	101.371	114.257	112.264	119.445	117.343	132.376	135.75	97.9245	102.472	115.861	119.916	124.854	131.797	137.518	144.943	100.999	101.063	106.436	105.318	113.81	121.921	121.543	89.1641	115.791	174.913	189.011	209.335	212.19	250.071	252.383	89.9154
	-3.35983	98.5359	98.9477	109.871	115.115	114.715	126.004	134.988	139.992	94.7865	96.9441	110.356	116.11	120.25	128.053	132.514	139.229	95.592	101.52	111.27	114.251	120.454	121.883	128.875	134.583	105.75	104.422	115.142	122.762	130.032	132.995	137.136	145.541	101.384	100.827	105.074	107.873	117.639	121.446	120.087	87.6505	114.499	172.575	179.507	204.367	213.216	243.765	257.69	88.97
	-3.29317	97.5414	99.6018	108.77	115.657	117.788	124.293	132.002	136.874	93.9268	95.78	111.28	114.596	119.871	128.521	133.802	144.925	96.3266	100.656	108.045	112.95	117.861	120.32	129.308	138.208	99.8299	104.213	115.421	118.033	125.124	136.359	135.561	146.936	100.423	103.702	106.353	107.663	116.773	120.685	126.977	88.5277	114.722	174.634	192.1	204.006	211.548	238.165	261.425	91.1926
	-3.22648	98.011	98.322	111.586	115.693	115.705	120.796	133.495	140.033	94.4814	97.4098	109.598	114.32	120.855	125.556	132.67	141.499	95.2246	101.043	112.22	112.676	119.589	120.99	131.235	138.417	100.919	105.118	116.82	124.184	129.626	131.198	138.902	143.249	100.576	101.457	104.95	105.611	114.95	118.925	127.074	86.3089	112.539	173.866	187.681	204.046	211.463	241.412	251.597	91.7565
	-3.1598	95.6354	98.6348	109.353	118.939	117.378	124.888	131.275	137.285	94.7865	97.6717	109.037	111.566	121.726	127.975	132.475	145.996	96.7788	97.9142	111.405	110.826	116.493	119.985	133.556	138.458	100.34	104.422	116.42	117.155	127.285	133.779	133.986	144.743	98.4243	97.8732	103.094	108.459	115.314	122.825	121.98	85.8101	114.677	174.669	185.647	207.853	215.141	240.8	251.843	90.131
	-3.09315	98.453	97.4118	109.806	115.981	114.544	125.037	129.701	138.638	94.0932	97.0314	108.872	115.077	119.606	125.127	135.831	137.302	96.0441	100.089	111.202	113.84	117.681	120.581	133.32	133.208	99.5236	103.517	112.545	118.494	125.439	133.548	132.506	142.601	99.8463	98.8972	104.703	106.449	116.454	117.309	121.737	88.7857	114.187	169.121	184.552	208.974	211.292	241.882	255.528	91.3253
	-3.02652	97.0442	99.6303	110.906	118.543	114.749	123.81	133.051	139.705	93.5108	96.4494	110.521	114.836	119.455	125.478	131.655	145.953	96.7505	97.6162	107.502	113.224	116.024	117.603	129.426	135.5	98.639	103.273	116.58	117.406	128.095	131.567	134.654	140.01	99.9231	100.67	106.106	104.062	113.309	117.309	122.61	85.3629	111.915	166.923	181.658	202.324	208.811	234.541	252.973	90.5789
	-2.9598	95.9116	100.284	109.741	114.935	116.763	123.177	133.818	141.017	95.3134	95.8964	111.84	114.045	117.79	126.844	128.767	142.998	93.501	100	109.572	115.313	116.169	119.241	128.6	135.833	100.34	104.701	116.58	124.351	125.889	132.258	135.561	140.957	97.1176	100.079	105.446	105.737	115.314	119.639	122.95	88.6137	112.606	173.866	189.636	203.245	213.473	233.129	248.354	89.6169
	-2.89318	97.0718	98.777	110.55	117.893	113.691	123.661	132.768	140.771	92.2074	95.6636	110.092	112.186	123.467	128.053	135.87	140.899	94.3487	101.639	108.486	111.579	115.736	118.906	131.471	132.125	101.701	105.675	113.903	118.87	127.465	129.171	137.184	143.896	100.192	100.354	105.446	106.993	115.223	114.693	122.465	85.4661	114.811	174.18	184.709	203.125	210.094	234.118	255.971	89.6334
	-1.99362	90.6077	96.3026	104.951	105.483	111.198	116.629	127.361	129.04	88.1309	92.0256	97.8232	106.196	111.09	117.909	122.365	134.004	86.9455	93.5936	102.512	104.865	109.831	114.961	120.85	130.542	110.65	113.545	124.451	131.883	143.134	150.783	150.931	160.438	112.068	112.722	115.594	115.997	128.122	127.485	129.937	106.983	132.673	205.583	221.705	235.337	251.155	291.059	295.676	101.36
	-1.93097	91.0497	95.2787	102.039	107.648	107.853	114.286	127.28	128.917	89.0738	92.3166	98.7467	107.47	109.727	117.519	120.765	134.347	84.4589	93.3254	100.407	103.666	109.003	111.239	123.013	129.167	109.425	113.823	127.407	133.682	138.046	148.756	145.298	158.196	107.648	106.538	112.665	114.782	124.567	125.583	131.004	105.71	130.178	199.477	213.649	239.343	249.701	283.059	280.344	101.808
	-1.86808	91.6298	94.909	101.78	106.818	109.15	115.885	126.15	128.179	88.741	91.2689	98.6807	110.568	111.923	115.919	122.248	126.638	85.7587	91.8355	101.12	103.118	107.886	110.421	119.001	125.042	104.185	114.067	119.297	131.925	136.245	143.825	148.162	155.157	107.456	108.625	113.16	115.117	121.787	123.015	131.684	103.732	131.269	205.373	219.75	227.364	247.305	279.435	279.509	100.133
	-1.80528	91.2983	92.1217	101.812	106.205	108.672	116.815	123.164	129.081	88.6301	91.007	96.6689	106.265	109.5	118.416	122.326	127.966	88.4713	90.1967	101.867	102.432	109.795	113.621	121.637	127.625	108.676	113.266	122.853	132.05	136.29	142.765	145.155	155.306	107.341	107.877	111.922	116.667	120.875	125.678	130.422	104.592	129.978	194.627	214.861	230.008	247.733	285.459	275.332	100.531
	-1.74255	92.4862	95.9044	103.754	105.556	109.901	115.588	126.715	127.194	87.1326	88.9406	97.3615	108.675	109.235	115.724	120.804	131.692	86.0413	92.5805	100.509	103.597	107.886	113.286	122.069	125.792	107.69	112.013	123.012	131.925	138.631	142.488	145.012	156.801	106.687	107.798	109.117	115.41	122.334	126.343	131.49	104.627	128.731	196.65	218.772	231.651	247.648	278.259	276.757	101.144
	-1.6798	90.9669	93.686	101.586	104.906	105.702	115.29	125.424	127.851	86.9662	88.3003	97.3615	104.406	111.204	118.416	119.906	131.478	86.889	91.8355	99.5248	102.706	106.266	112.17	120.692	125	105.138	113.37	122.893	130.042	136.695	141.935	143.15	152.566	104.958	106.262	112.252	113.065	124.294	125.345	132.314	102.563	129.933	195.953	211.693	231.13	246.364	284.565	269.73	100.415
	-1.61698	90.3315	94.7099	103.786	107.937	106.282	115.848	126.029	127.194	87.1326	86.7288	98.6807	108.571	110.484	116.348	123.185	130.621	86.1543	93.1168	100.17	106.475	108.498	112.765	118.45	125.333	103.334	112.361	122.333	127.992	136.47	143.687	144.248	154.459	104.804	105.908	111.427	114.992	122.607	125.678	129.937	102.804	123.987	197.732	206.688	234.615	242.985	275.671	271.106	95.787
	-1.55428	88.1492	94.9943	100.356	106.999	107.136	111.793	119.734	128.507	87.7704	86.9325	98.0541	105.404	107.721	115.021	118.657	126.51	88.3583	89.2729	101.867	103.529	105.149	111.723	118.411	125.625	106.567	112.117	120.935	130.251	135.164	141.06	144.344	154.21	107.725	106.735	108.952	115.369	126.253	121.398	128.336	101.428	125.679	193.126	209.777	226.522	243.926	272.141	279.951	98.756
	-1.4915	88.7017	93.8282	101.456	103.608	107.511	117.448	121.671	130.148	86.772	90.8324	98.6148	105.336	107.911	117.44	121.702	130.535	84.8827	91.7461	97.8276	104.591	107.778	109.788	118.686	125.833	106.261	107.382	122.413	127.28	136.92	142.258	141.002	156.004	104.881	103.781	109.323	111.265	126.527	123.918	131.053	98.3832	126.503	193.51	208.487	228.566	244.098	266.635	274.595	97.3627
	-1.42873	89.7514	94.3117	101.036	102.381	108.296	115.737	122.357	126.456	86.3838	89.7846	98.9446	106.472	109.538	114.67	118.97	127.623	87.0302	91.329	100.679	103.323	110.011	109.974	120.024	123.542	105.444	110.167	118.857	130.544	138.361	140.092	142.625	154.459	103.805	105.514	106.353	109.883	121.969	121.874	128.287	101.273	122.16	192.847	208.526	228.405	242.173	277.694	283.047	97.7774
	-1.36597	88.8122	91.8942	102.524	105.592	106.453	110.454	126.352	127.358	85.5241	87.9802	93.7005	106.093	104.845	114.592	120.062	131.777	84.1198	93.4446	99.4229	100.754	107.886	109.192	118.293	127.583	103.811	109.958	122.213	128.661	136.83	140.461	139.236	155.755	104.612	102.836	105.941	114.782	121.468	122.111	124.066	99.7764	127.996	191.521	205.944	225.841	240.419	273.553	278.526	101.062
	-1.30323	89.5304	93.5154	101.036	105.664	106.009	112.202	123.769	126.538	86.0233	88.3003	95.1187	103.89	103.823	115.099	118.228	130.107	85.2501	90.5244	97.59	102.569	107.202	109.49	117.506	126.708	105.376	109.61	118.698	128.87	133.003	137.742	141.146	155.506	105.227	107.247	109.241	111.767	120.647	122.159	135.177	99.6388	124.944	186.357	209.386	228.365	236.441	272.706	264.079	97.6945
	-1.24025	89.779	93.6576	102.039	103.896	104.712	111.83	124.092	123.749	86.7166	88.1839	96.3391	104.096	106.548	115.646	119.672	129.208	85.9282	91.0012	98.9138	100.891	104.501	107.034	115.696	122.083	105.308	107.486	120.895	128.243	132.238	140.876	141.766	151.769	102.844	106.538	107.756	112.102	121.559	123.3	128.967	100.103	125.145	196.092	204.028	221.915	237.425	272.847	274.742	99.519
	-1.17748	89.7238	91.24	100.194	105.916	105.736	111.979	123.002	124.733	86.1897	87.0489	95.4485	104.406	107.494	113.461	121.233	126.253	86.6629	90.5244	98.1331	101.987	102.845	111.649	117.939	124.208	112.079	114.485	122.653	127.029	133.273	140.184	141.766	157.05	105.65	106.105	107.343	114.238	121.057	123.538	122.804	98.4176	125.59	196.336	204.537	229.888	235.287	268.847	277.789	99.4526
	-1.11488	88.453	92.6621	101.942	104.87	104.541	112.574	121.106	126.538	85.4687	86.0303	96.504	104.613	109.841	114.904	118.189	131.349	83.7807	92.1037	96.945	102.467	106.95	107.964	118.411	123.042	105.444	109.227	118.977	124.937	136.02	139.724	140.382	152.915	105.38	102.678	105.116	110.595	120.875	120.399	128.772	98.8992	125.924	194.243	211.576	226.282	239.735	270.871	265.799	98.275
	-1.05218	90.221	92.8896	100.777	105.123	105.292	112.984	123.164	128.015	86.2729	88.7369	96.2401	105.99	106.662	113.734	119.477	128.779	86.3521	90.3754	98.0312	101.61	103.205	110.086	116.365	121.333	107.247	113.092	120.855	128.87	133.724	141.429	143.15	157.648	103.036	105.396	105.776	112.186	120.738	124.727	126.492	101.359	123.185	188.067	208.291	222.436	242.387	275.388	270.86	97.794
	-0.989217	87.0994	92.3777	100.388	103.716	107.989	109.524	120.944	126.825	85.1082	89.6682	95.3496	104.131	108.554	115.256	117.994	125.696	83.7525	92.3421	97.5221	105.55	105.221	107.89	118.686	123.458	106.465	107.556	119.856	124.226	132.103	140.829	142.625	152.965	103.19	105.002	107.756	113.233	123.519	124.536	122.95	98.8648	127.906	194.557	203.52	221.074	237.725	267.859	274.742	97.9764
	-0.92645	89.5304	91.496	103.236	104.545	104.541	111.905	125.343	122.847	84.8308	89.7555	98.3179	106.472	106.132	114.28	120.18	124.668	85.4479	89.8093	96.6735	100.822	106.086	109.006	118.175	124.667	107.247	108.809	124.211	126.402	133.633	141.751	140.668	153.662	106.61	106.774	105.239	112.73	123.017	120.542	127.608	99.9484	128.797	187.474	207.939	218.55	237.853	265.176	273.661	98.076
	-0.8639	89.3923	91.0694	100.68	102.814	106.897	112.091	121.186	128.753	85.1913	88.5041	96.405	106.127	106.132	112.798	119.633	127.109	83.1591	91.0608	98.2688	100.685	104.213	105.88	121.479	121.75	106.737	109.958	121.894	127.615	135.344	139.078	140.716	150.224	107.571	106.853	104.785	112.898	122.242	124.536	123.096	100.464	125.568	195.115	205.944	222.316	237.382	263.294	274.349	95.8036
	-0.801133	89.8066	90.6143	101.197	103.247	105.36	110.863	123.89	124.159	84.6922	86.1467	96.3391	104.234	106.359	113.773	120.375	128.522	86.2391	90.435	100.713	100.891	105.474	109.192	118.293	120.292	108.847	106.894	120.096	129.247	135.66	142.212	140.334	152.018	104.573	107.208	108.333	112.06	121.285	118.402	127.511	100.017	125.969	188.137	204.693	218.51	239.222	267.576	275.233	96.4505
	0	100	100	100	100	100	100	100	100	100	100	100	100	100	100	100	100	100	100	100	100	100	100	100	100	100	100	100	100	100	100	100	100	100	100	100	100	100	100	100	100	100	100	100	100	100	100	100	100
	0.0625833	99.8343	100.171	99.0939	99.7114	96.8931	99.3676	101.09	98.3593	98.9739	98.0792	100.231	96.7986	97.6533	99.6098	97.502	97.1734	101.865	99.7914	98.6083	100.445	96.1109	98.7719	99.3312	100.75	98.673	98.3287	96.4043	96.4435	98.5592	99.2627	97.7088	100.349	100.73	96.0614	99.4637	99.7906	100.775	99.7622	97.7681	97.248	98.8641	96.9644	95.8936	97.6362	95.0813	95.2471	97.4447	96.4173
	0.1255	100.608	100.967	99.9676	97.0779	97.4053	98.0655	97.9822	94.7908	97.3655	98.5448	99.8021	96.9707	96.3285	98.7515	96.5652	98.3298	95.7615	99.9702	98.0312	100.308	98.6316	95.6829	99.5279	97.4167	98.8772	97.6671	93.8074	98.0753	98.9194	96.1751	96.1337	96.6119	97.9247	96.1402	95.7508	97.8224	101.55	100.238	97.3799	95.5108	96.1247	98.709	94.4857	97.3958	94.8674	97.4118	96.1179	95.6709
	0.188183	101.63	99.2605	98.6408	98.8095	99.044	97.7679	98.7086	96.3905	96.4781	94.7322	96.438	95.938	98.2967	95.7082	95.4333	97.9015	97.909	100.536	96.1982	97.1566	94.0943	97.1716	97.4823	96.9583	102.28	98.1198	95.9648	96.9038	96.0378	96.7742	96.4678	95.1171	96.9639	95.0768	94.0182	98.0318	98.7694	96.9092	92.819	95.4248	97.4165	97.2087	95.6981	91.226	92.9855	95.6235	92.7273	98.3414
	0.25105	101.602	100.256	99.4175	96.8254	98.0881	96.9122	99.1122	94.7088	98.142	96.6531	97.6253	97.2461	99.735	98.3613	95.9797	93.4904	99.6609	98.5697	96.8432	99.7259	96.0749	94.9386	95.24	95.125	99.0813	98.2242	95.3256	95.7322	97.7488	97.7419	94.8449	92.5262	98.7702	98.3064	97.731	96.1474	100.729	99.0965	94.3717	99.1744	98.7528	99.5115	95.3852	94.5513	95.509	95.6235	92.4324	94.5265
	0.314	99.1713	98.322	99.0939	97.4747	96.3127	93.4524	96.4487	93.7244	98.3361	95.6054	96.3391	95.4217	96.5556	98.5174	94.4965	93.7901	97.5699	94.5471	97.9294	98.4584	96.2189	94.3803	97.443	93.25	101.973	98.0501	97.9225	96.4017	97.7037	95.0691	93.7947	90.9317	96.1952	97.2036	95.1733	96.5243	98.4047	96.9567	91.5575	97.9016	95.5011	96.5457	91.1615	93.8301	92.1728	93.8824	93.1204	92.1214
	0.37675	99.0884	96.8146	98.2848	98.6291	94.5032	93.2292	96.4487	92.4528	96.7277	96.5949	97.4274	94.0448	96.2528	96.2154	96.1749	94.3041	96.3832	98.1526	95.3157	97.7047	97.2272	93.7477	94.1778	89.25	99.4556	94.8468	93.9672	95.7741	98.3791	95.3917	91.4081	90.6328	95.9262	94.6829	95.9571	98.325	100.82	97.3847	90.9267	94.9088	93.0958	97.6622	94.8768	92.8285	91.9589	93.8353	89.3366	93.863
	0.439533	100.387	97.2981	97.9935	95.671	96.5517	95.4613	97.2155	90.7711	95.6461	95.5763	98.5158	95.3528	95.0795	97.1128	93.4036	94.6895	96.581	98.8379	96.7753	93.1826	92.942	93.115	92.7223	92.4583	100.102	94.3245	94.4067	95.4812	92.8411	95.6221	91.4558	89.2875	95.7341	93.7377	97.6898	95.8961	97.4476	97.1469	91.606	97.506	96.0134	95.3245	92.4521	92.9487	90.5047	94.7294	85.6511	93.2161
	0.502317	101.243	97.8669	94.9191	97.7273	96.7907	95.3869	96.8523	89.5816	97.0327	93.1607	94.5251	91.3253	98.7509	97.0737	93.6378	91.3919	99.9717	97.348	94.8405	94.3131	95.1386	93.4872	91.5814	91.4583	97.346	94.812	93.4479	93.0544	95.9478	94.0092	90.2625	88.9885	97.0407	91.2564	94.1832	95.4355	97.5387	94.9596	89.7623	95.786	93.608	94.208	92.061	92.8686	91.018	91.2471	87.5676	93.6805
	0.565117	98.7845	98.6064	96.5372	93.7951	93.1717	93.5268	94.0274	89.9098	96.8941	95.3143	95.2836	92.8055	95.4201	96.9177	93.5207	90.3212	99.4349	96.4839	96.3001	97.739	92.1138	93.0033	91.4634	89	101.701	97.0752	90.7711	95.6067	95.9027	92.765	90.4535	87.2446	95.9262	96.1796	97.3597	96.6499	98.268	98.4308	85.6866	94.1692	93.4744	94.4522	91.6308	91.867	89.7776	91.6235	85.0614	92.5858
	0.62805	100.138	98.1513	97.5405	98.4848	94.0253	94.9777	95.0363	89.4996	97.4764	96.5367	97.8892	94.6644	95.8365	94.9278	92.7791	91.606	96.5244	95.0834	94.7386	94.2789	90.9255	89.6167	92.5256	88.2917	98.3668	95.195	91.8498	94.477	96.6682	92.9032	89.642	86.8959	93.6203	93.6195	93.3581	92.5461	95.9891	96.0057	88.3552	95.4764	95.5011	96.2666	94.0555	90.9856	91.2318	91.1529	82.9975	91.0267
	0.690617	98.8674	96.8146	97.2168	93.8672	91.0208	92.8199	92.4939	87.6538	96.3672	92.8114	93.0079	93.7005	94.436	93.9134	91.9204	89.379	96.581	95.1728	97.8276	97.876	92.6179	90.8076	91.8175	90.375	101.327	97.2841	91.69	92.636	94.2368	93.8249	89.1169	84.1056	95.0038	93.4226	93.9356	94.8492	95.8523	94.389	85.3954	93.0685	93.363	92.4634	90.4576	91.1058	88.4517	86.5412	83.5381	93.4981
	0.75335	99.5028	97.3265	97.3139	96.3203	91.7378	93.9732	93.7046	85.0697	96.6445	93.9756	95.1517	93.5284	96.1771	94.4596	91.7252	91.5203	96.2419	97.6758	95.5533	95.9918	92.5459	91.1425	90.952	85.2083	104.934	95.0209	90.4914	93.1381	94.7321	93.2719	86.969	85.3014	96.0415	92.6743	93.1106	93.0486	96.7183	95.2924	81.5138	93.9456	93.2517	94.7662	90.8095	88.7821	87.7673	86.7765	81.9165	91.8063
	0.81615	99.9171	96.843	96.0518	92.0635	93.5131	93.4152	94.6731	86.9975	95.5075	94.0338	92.6121	91.5663	93.3005	93.3281	90.0078	85.5675	98.8697	96.6031	94.9423	93.9705	90.9975	91.5519	91.4634	86.3333	95.4406	95.4387	91.1306	93.7238	92.796	93.4101	86.8258	83.8067	94.658	93.1863	94.3069	91.6667	96.3993	94.2939	85.5895	96.646	95.8352	94.9058	91.3962	92.8686	88.024	88.7529	78.3784	93.5479
	0.878867	99.8343	96.9283	96.1489	92.5325	93.0352	91.5551	92.7361	84.4955	98.3361	95.3725	94.8879	93.9759	92.8085	93.7183	90.4372	83.8544	97.0331	95.3218	93.9579	97.6362	90.9615	89.0212	88.749	82.9583	99.966	93.5237	91.3304	92.6778	93.0212	91.7512	87.8759	82.9098	94.8501	91.926	95.0083	94.8492	96.0346	95.0071	83.9884	98.5552	95.2561	94.5569	91.5917	90.4647	88.0667	88.3765	78.8698	95.0738
	0.94185	97.6519	98.0091	94.9515	93.8672	93.8204	92.7083	90.8797	82.9779	98.5302	91.2689	94.3272	94.5955	95.0416	93.2891	88.993	86.9807	96.1854	98.242	94.6707	94.6214	92.0418	91.1425	89.8899	84.9583	98.9452	93.6978	94.5266	92.4268	94.1018	92.4885	89.0215	82.9098	95.1191	93.2257	93.6056	93.8861	95.8979	94.8645	81.6594	92.6213	92.4722	92.9518	91.7873	90.3846	88.3234	83.4824	80.4914	92.3868
	1.00455	99.3094	97.4118	95.5663	95.3463	94.9812	90.4762	93.866	83.8802	94.8142	93.5972	93.7335	92.6334	92.7328	92.5868	90.9055	86.4668	98.3329	95.8582	91.446	93.5252	90.4573	90.2493	90.7946	84.9583	99.8299	93.454	93.5278	91.4644	93.4714	92.3041	85.6325	82.9098	93.8509	92.4774	93.6469	93.6767	95.67	94.389	83.2606	93.6533	92.5167	94.2428	93.1169	89.8638	87.6818	87.0588	78.8698	94.2279
	1.06747	97.7901	98.2082	97.8317	94.1558	89.9283	92.4851	91.8483	79.9836	95.1747	95.4307	93.3707	92.1859	90.5753	91.4163	85.6753	85.2677	96.7222	93.683	94.1616	92.0863	91.6457	90.4354	89.0637	84.9583	99.1494	94.9861	90.3716	91.2552	92.5259	91.9355	85.1074	79.8206	94.3505	93.6589	91.5429	95.0168	94.4394	93.5806	82.1446	94.2208	94.9666	93.3706	91.3571	90.3045	86.2703	84.7529	77.3464	92.7351
	1.13017	98.0939	95.2218	96.4725	93.4704	94.7422	91.2574	91.1219	80.6399	99.4731	94.8196	92.81	92.7711	94.7767	94.7327	86.534	86.7238	96.581	94.3385	93.1432	94.7927	90.3853	88.8351	87.8049	82.7917	94.7261	93.5237	91.0507	91.2134	90.5448	89.8618	84.3914	79.5715	95.6956	93.3438	92.7805	92.6298	93.4822	94.8645	81.4168	93.8596	94.2539	94.0684	90.7313	91.226	87.5107	83.9529	77.4939	92.6024
	1.19313	98.2873	97.9807	97.8641	92.2799	91.6695	90.2158	91.7272	80.5168	96.7277	94.5285	95.0858	91.9449	92.5057	93.055	86.4949	81.7559	93.3032	95.7092	91.7515	95.1696	90.6014	87.7186	90.3619	83.0833	98.605	92.5487	88.7735	93.9749	93.3363	91.7051	83.6277	79.1729	94.6195	92.1623	92.9043	93.4255	91.9781	94.1988	83.5032	91.9849	94.922	91.3817	90.3402	89.5032	88.7938	86.1176	76.4128	92.9839
	1.25583	98.674	96.6724	95.3398	92.6046	93.24	89.4345	88.3374	78.7941	99.5008	96.071	94.0633	93.3563	95.4958	91.6894	90.8275	85.0107	93.6988	95.2026	95.3157	95.4436	90.2773	88.984	90.4013	81.625	101.021	93.2103	91.4103	92.9707	91.9406	90.6912	83.1504	78.9238	93.8509	92.9894	94.3069	90.9548	94.0747	96.0057	80.7375	94.8228	91.8263	93.6846	95.6199	90.4647	88.6228	83.1059	76.9042	93.3156
	1.31867	98.3702	94.9374	94.7249	93.3261	89.3138	90.1042	88.4181	78.671	96.3672	94.2375	92.6451	91.7728	94.2846	93.7963	89.6956	83.9829	93.4162	96.8415	93.2111	92.2576	87.7566	90.3982	87.6869	79.75	94.1477	95.6128	88.6536	93.0126	92.0756	88.1567	86.1575	77.8774	94.6964	94.8011	94.3069	89.0704	92.4795	93.7708	80.0097	93.3609	94.2984	95.6385	92.2957	89.5032	86.0565	83.6706	74.3489	91.3916
	1.38138	98.1215	97.7816	94.3689	92.785	92.0109	88.0952	89.7094	79.7785	95.9789	95.8673	92.4472	94.5267	92.7328	91.7284	85.5972	83.9829	95.1116	93.1466	93.1093	92.9085	89.5211	91.0309	87.0968	80.9167	99.3875	94.1504	92.0096	93.0126	92.796	89.1705	83.8663	76.9307	94.3889	92.1623	94.4307	92.6298	92.206	92.9624	78.0204	91.8301	91.314	93.4752	90.6922	89.1827	86.2275	82.1647	74.2998	93.5313
	1.44445	97.5967	97.8385	96.6019	94.0837	88.7675	90.3646	90.1937	79.2453	94.1486	92.4331	94.1953	93.9415	94.4739	94.0694	87.1975	81.9272	94.0661	94.8153	92.1928	91.915	89.269	89.505	88.1983	81.5417	98.9452	93.2451	91.3304	90.3347	89.5993	88.894	82.1957	77.0304	93.4666	91.5321	92.698	91.2898	95.8067	93.01	79.1363	91.6753	93.029	94.4871	89.5972	89.7837	86.9547	84.0471	72.9238	93.5147
	1.50697	96.2707	96.3879	94.6926	94.1558	90.7136	91.8155	88.8216	77.1534	96.0067	91.8801	94.8219	92.5301	91.8622	91.3773	85.2849	80.6852	95.3942	95.888	90.835	94.5187	91.6817	89.3562	87.7655	78.875	96.9718	94.2549	91.69	91.8828	91.1751	89.9539	84.0095	74.8381	94.5427	95.195	92.0792	93.928	92.0237	91.3932	82.5328	94.9776	94.6548	95.8479	90.3402	92.5481	84.8161	81.1765	71.1057	92.0053
	1.56978	99.2541	95.9329	95.4045	93.9033	91.9426	91.0714	87.2881	76.6612	95.868	93.6845	92.81	92.1859	91.9001	91.2212	84.4262	81.7559	96.581	93.5638	91.2763	95.0325	88.7649	89.4306	86.5854	77.875	96.6315	93.3496	91.7699	91.2134	90.2296	89.0323	81.957	74.0409	94.5811	94.6042	91.3366	91.7085	93.8469	88.5877	77.9233	93.9972	92.0045	96.9644	89.3234	88.3814	85.8426	83.3412	73.1695	93.8464
	1.63257	96.6851	95.876	96.2783	93.3983	92.9327	91.1086	86.6828	75.6358	98.3361	94.1211	93.0079	92.6334	93.679	95.435	86.4559	80.5139	98.7285	94.9642	92.7699	93.4567	91.3216	88.0164	85.6806	78.2083	97.4141	92.5487	89.7723	91.2134	91.1751	89.6313	82.8162	75.4858	96.1568	94.1709	90.8828	92.5042	95.2142	89.9192	76.8074	91.6753	94.343	90.963	90.7704	87.5401	86.9974	82.6353	72.5307	95.7704
	1.69553	97.1547	96.3026	92.4272	93.29	91.8402	90.6994	87.8128	78.3429	96.1453	93.83	93.5026	91.1188	93.1113	92.1186	87.822	77.6874	96.8353	94.8749	94.535	95.1353	89.9172	87.3837	85.7199	77.9167	98.8772	93.5933	87.6548	91.0879	88.1585	90.3226	81.5274	73.5924	94.1583	92.3198	89.7277	92.7554	91.7502	92.1541	73.7021	94.4616	91.7372	90.5094	91.5917	90.024	86.0565	80.9412	69.14	92.9507
	1.7583	99.3094	96.3026	95.2104	94.1558	92.1816	89.7693	85.9161	73.4208	93.5108	92.1129	92.909	89.3976	91.8622	92.8599	85.7533	80.6424	94.9986	98.1824	93.1093	92.2576	88.7288	87.2721	84.2644	76.5833	96.1552	93.8022	91.5701	91.2134	90.4998	89.4009	79.3795	74.9875	93.6972	92.2017	91.3366	89.4054	91.2033	90.5373	75.0121	93.9972	91.069	91.9749	90.2229	83.734	84.8589	81.7882	70.4177	94.1118
	1.82108	98.7569	96.0466	96.9903	93.6508	89.86	86.0863	86.1985	76.3331	95.6461	92.4331	91.029	91.0155	91.2566	88.9973	85.6362	80.2141	95.2812	94.6365	90.5974	92.6002	90.3133	87.4953	85.0511	76.7917	95.4066	92.4443	92.1294	90.5439	90.5898	86.3594	80.1432	72.7952	95.8493	91.3746	92.2442	93.7605	92.6162	90.8702	74.624	89.9209	92.2717	90.6839	89.2843	86.0577	83.1052	79.5294	68.9926	92.0551
	1.88402	99.0331	96.3311	96.4725	93.4343	94.196	86.756	83.6562	75.1846	95.6184	94.2666	95.6135	90.0861	92.0136	92.7039	87.2365	79.7859	91.6361	94.3683	91.48	94.3474	88.8009	86.4905	83.989	74.25	98.5029	93.4889	87.9744	90.8368	90.8149	87.6037	80.4296	73.7917	93.9662	91.4927	89.6865	92.6298	93.1632	90.2996	72.9743	96.0096	92.0713	90.9979	90.3402	87.5	82.5064	77.8824	70.2703	93.0668
	1.94678	98.9779	96.843	95.4693	93.4704	90.6794	89.8438	89.3059	74.6924	97.9201	92.2002	91.3259	91.1188	94.436	89.5825	83.0211	76.7452	97.7395	94.4875	91.5139	93.765	89.7731	87.4953	84.6577	76.125	96.9377	91.1908	89.5326	90.251	88.7438	88.7097	79.284	71.151	92.0446	91.8866	92.2442	90.3266	93.7557	91.0128	72.5861	96.0268	91.9599	90.6141	88.3066	88.3413	82.207	79.9529	67.9115	91.8063
	2.00962	97.3757	96.2457	93.1392	91.7027	90.6111	86.4583	86.3196	74.4053	95.9512	94.4121	92.7111	89.6386	91.1809	88.5681	83.4504	76.7024	95.818	96.2455	93.1432	91.6067	90.7094	86.751	84.8938	76.3333	96.4614	92.4095	87.9744	87.9079	90.4097	87.3733	79.5227	72.3468	92.6211	92.7531	92.533	92.7136	92.206	89.1108	74.2843	91.6753	93.6748	89.8465	88.5804	87.6202	84.089	79.2471	67.0762	91.856
	2.0724	97.6519	95.8191	94.4984	94.1558	90.7477	88.9509	83.6562	71.9852	94.8697	93.9756	92.3153	90.7057	93.4141	89.6606	83.6846	75.6745	95.6202	97.4076	93.4827	92.9428	89.8452	88.3141	82.14	73.75	99.4216	93.9415	88.6936	88.5774	87.9784	86.0829	80.4773	70.4534	93.6587	92.6743	92.863	89.9916	91.7958	89.729	72.7802	91.3657	92.6281	90.7537	88.3457	88.2612	84.4311	78.3529	68.059	91.7731
	2.13512	96.6851	97.3549	96.5049	93.9755	89.2796	87.2024	86.1985	73.5439	95.2302	94.8196	91.4248	90.9466	91.3323	90.3629	82.4356	74.2612	94.8008	94.994	94.9762	91.0586	89.7011	85.6718	85.7986	76	99.3195	92.6184	91.0108	89.9582	90.1396	89.0323	78.568	70.9018	92.7364	91.6503	90.8416	92.5879	90.7931	90.9177	71.5187	90.7293	90.4232	90.6141	88.0329	88.8221	81.8221	77.1294	65.4545	90.1808
	2.19807	97.7072	96.1889	92.4919	92.6768	91.1574	88.6533	85.8757	72.7646	96.1176	92.2293	94.9868	92.5645	92.0893	88.256	82.6698	76.7452	94.6878	95.5602	91.5479	92.1206	87.8646	88.128	83.6349	73.7917	95.3045	92.1657	89.0931	89.0377	87.8883	86.7281	79.5704	70.6527	94.8501	91.1382	92.4505	91.4573	93.2999	88.7779	71.2276	93.3609	92.4722	90.3699	87.72	87.0593	83.3618	76.6118	64.5209	93.2161
	2.26085	96.0221	97.2127	93.8188	92.8932	91.6695	88.4673	85.6739	73.913	96.0621	96.4203	90.4354	91.1532	88.9099	90.2068	83.8798	75.7173	94.9421	96.6031	92.1249	90.3734	88.4768	86.2672	83.1629	72.3333	97.5502	91.6086	87.4551	88.954	90.905	88.2949	78.568	70.4036	92.3905	89.6416	90.2228	91.4573	93.5278	88.5402	71.5187	94.1176	91.069	88.2066	89.6754	85.3365	82.8058	77.5059	66.9287	93.863
	2.32353	96.6575	94.6246	94.4013	93.7229	90.5428	88.2812	82.4455	71.411	94.8419	96.1874	90.1715	93.0809	89.402	92.7039	82.4746	75.9315	94.4335	94.8451	94.0937	89.4827	88.4768	86.7138	81.7073	72.7083	98.9452	92.7577	90.4914	89.5397	89.9145	87.2811	78.3294	68.7095	93.6972	90.9019	92.7805	89.6147	92.0693	89.6814	69.966	92.3977	93.5857	90.5443	87.5636	84.5353	81.9932	75.8118	65.3563	91.1096
	2.38638	97.5691	96.2173	96.0518	92.6046	88.9723	88.0208	83.3737	71.1649	96.589	96.5367	93.8984	93.3907	91.5973	88.8022	81.5379	75.0321	94.9138	94.0703	92.4644	92.0863	90.2773	86.3789	83.0842	71.9167	94.7601	93.7326	89.7323	88.8285	88.5637	85.2995	77.5179	69.2576	93.0822	92.3592	93.4406	91.6667	91.7046	87.1136	69.5779	93.3265	91.9376	92.1493	89.2843	87.2596	80.4962	75.8588	66.4865	92.4034
	2.44917	97.1547	94.8521	94.0129	90.6926	89.0748	86.0491	83.293	72.4364	98.2252	95.1979	93.0739	89.9484	91.673	90.714	83.9578	74.1328	95.6767	96.5435	94.535	93.1141	89.8812	88.128	82.4941	73	95.3045	91.922	90.5713	89.6653	88.6988	87.235	77.0406	67.713	95.1576	91.4533	91.2541	94.4305	90.6108	88.5877	67.6371	93.9112	92.2494	88.9742	86.8596	87.0994	82.0359	75.1059	66.2899	96.0856
	2.51195	98.5083	96.0751	93.5599	91.0895	90.0307	86.7932	84.1001	71.6161	94.8142	92.0838	93.1728	89.1566	91.5973	88.8802	79.274	73.4904	97.1178	95.0834	94.535	93.6965	88.4768	87.4209	80.2911	75.125	94.1477	89.9721	87.6948	89.2887	87.348	85.4839	79.7136	68.9088	94.3889	91.0595	91.4604	90.1173	91.2489	87.7794	68.1708	91.6409	93.2962	88.1019	90.6531	85.5769	81.3516	75.5294	64.6192	89.3349
	2.57468	97.1271	96.3026	92.6861	92.3521	88.2895	85.8631	83.4544	71.6161	95.6739	91.6182	94.69	89.4664	90.8403	90.4799	82.3185	73.4904	95.3094	95.3218	91.5818	93.2169	89.377	84.7413	81.0779	72	98.8431	91.0515	90.3316	87.2803	88.4286	84.5161	76.9451	67.5137	93.4281	91.6109	90.7178	89.7404	92.2516	87.922	68.4619	92.2429	93.7416	89.6371	87.8373	83.5337	83.0197	76.6588	64.226	90.9935
	2.63743	95.8011	96.9283	92.3948	90.7287	89.8942	86.4583	79.4189	70.3035	94.0932	93.1607	92.2823	89.3632	89.5155	88.451	81.5769	73.2334	98.7567	94.3981	89.0699	90.4077	90.4213	86.3789	81.786	73.125	99.8639	91.0515	87.7747	90.0418	88.7888	87.5115	78.9021	66.2182	94.5427	91.0595	89.769	92.1273	90.6563	88.7779	67.3945	93.5501	91.8931	87.8227	87.8373	85.2965	83.148	75.4824	64.7666	94.2611
	2.70022	96.547	96.0182	93.657	91.4502	88.8699	85.9747	80.7506	68.0066	95.3134	90.9488	92.5792	92.1859	91.7487	91.2212	82.5527	73.1049	97.1461	97.8248	93.4487	91.5725	88.4048	84.518	80.2911	70.5	96.1892	92.2006	89.7723	86.7364	88.3386	83.4562	77.1838	66.567	90.6995	91.0989	89.2739	93.7605	90.2917	87.6843	69.3838	92.0881	92.049	88.5555	87.7982	85.7772	81.5227	73.5059	65.3563	91.9721
	2.763	96.989	93.3732	94.9191	93.8312	89.0748	87.0908	82.8491	69.2371	96.0899	93.1024	92.777	91.7384	90.1968	89.9727	82.4746	71.7773	96.4114	94.7855	91.9891	94.0391	88.8009	85.0019	83.5169	72.4167	95.4747	91.7131	88.9732	89.1213	87.7533	85.1152	77.3747	66.9158	94.043	92.95	90.4703	93.5511	90.2461	88.8255	67.9282	92.1225	90.3786	91.8353	87.5244	86.899	79.8546	73.9294	62.5553	94.0289
	2.82573	96.8232	96.2457	93.8511	92.7489	91.1574	86.7188	81.8805	68.0066	94.7865	94.2666	90.6662	91.9449	87.623	90.792	79.9375	72.8051	95.5355	96.1561	91.2084	92.8058	90.2053	87.0488	80.9992	71.875	100.408	93.6281	91.2105	88.7029	88.4286	84.8848	73.6038	66.4175	92.3136	88.7357	90.6353	92.2529	90.155	90.1569	67.2004	91.5549	88.6637	88.7648	88.9323	83.5737	81.4799	73.1765	64.6192	92.0385
	2.88848	95.3591	94.0273	91.0356	90.1154	89.6552	85.6027	81.7595	67.3913	95.868	91.9092	93.2718	91.222	89.2127	89.5825	81.8891	71.8201	98.0503	96.1263	92.8717	91.2299	89.6651	85.8578	81.1566	68.4583	98.5029	88.7187	89.0531	87.4059	87.0329	83.4101	73.8425	64.7733	93.5819	90.3505	90.264	91.4573	89.3801	85.7822	66.7637	91.2969	92.0267	90.3699	87.7591	86.4183	80.154	72	62.9484	92.8678
	2.95147	96.4917	95.3072	95.3074	90.5483	87.8457	87.0536	80.0646	68.5398	92.6511	93.83	90.6003	90.568	90.8403	88.9973	80.6792	71.5632	94.4617	97.7354	95.3496	89.7568	88.9809	85.2996	82.2187	69.4167	95.5767	91.9916	89.8522	89.3724	88.9239	85.9908	76.0382	65.0722	93.5434	89.8385	90.9241	89.4891	90.0638	89.1108	65.5992	91.0217	90.3118	88.2066	87.3289	84.1747	80.5817	72.7529	61.2285	93.1664
	3.01413	96.8232	95.7907	92.2006	91.5945	88.6992	84.375	80.3471	66.571	94.2041	92.7823	92.5792	89.6386	89.6291	88.0609	79.9766	69.8929	96.4962	97.0501	91.2424	92.2919	90.4933	84.9274	79.5043	70.3333	100.068	92.0265	89.7723	86.7364	86.8978	84.7465	73.7947	65.1719	93.3897	92.6743	90.6766	87.8978	92.7074	86.7808	67.0063	89.5253	93.4967	89.8814	87.4071	86.5785	79.6407	72.3765	62.8993	90.9935
	3.07703	97.2099	95.5063	92.4595	91.0173	89.9283	86.942	82.7684	68.3347	96.284	94.0629	90.0066	87.883	87.888	85.8759	78.9227	70.4497	99.124	96.1561	94.1276	90.8873	86.7123	85.9695	80.9205	70.2917	93.6713	91.8524	89.2529	87.4895	88.2485	83.2258	74.5107	66.1684	92.6595	91.0989	90.5528	89.0704	90.474	85.2116	66.7637	91.7269	92.9399	88.5904	84.0438	83.6538	80.4962	73.2706	61.3268	92.818
	3.13977	96.6851	94.2548	93.7217	94.0115	89.9283	86.6443	80.6699	68.1706	97.1436	93.3644	90.1055	88.4682	89.6291	90.2068	78.025	71.349	93.2184	96.1263	92.1589	91.7095	86.2441	83.6249	79.7404	68.9583	95.8489	91.5738	87.6948	88.2427	88.0234	85.4378	74.6539	63.9761	93.3897	91.6109	89.6865	91.3317	89.608	85.8298	64.6773	91.2797	90.1782	89.5673	87.7591	85.1763	80.1112	72.3765	63.5872	91.458
	3.20277	95.7735	97.554	93.7864	91.1977	89.3479	85.8631	80.6295	66.4889	95.8957	90.8906	91.7876	91.4974	90.5753	87.2415	79.1569	71.0493	94.5182	96.9011	92.6001	90.8188	87.0004	84.1831	78.5208	68.9583	93.1269	90.8774	86.0967	89.3724	86.9428	81.7972	74.1766	65.2217	93.6587	90.3505	89.3977	91.8342	89.8815	84.4508	66.327	87.3581	89.9332	89.2533	88.7368	83.8942	81.3088	72.3765	62.0639	91.4248
	3.26535	96.989	96.3879	92.0388	91.3781	88.4602	85.8631	79.4189	66.5299	96.3117	94.7322	92.9749	89.9828	91.1052	90.753	82.3575	70.1499	97.7395	93.0572	92.4644	90.0651	85.4159	85.374	79.9371	68.4583	96.9718	92.2006	87.8945	85.4812	89.014	85.3456	73.1265	65.1719	90.3151	90.1536	93.1106	88.7353	90.2461	90.4422	63.8525	92.6385	92.539	88.4857	87.8764	84.5753	79.6407	69.7412	60.688	92.5858
	3.32805	94.779	93.8567	93.9482	91.3059	90.4404	87.3884	80.0242	65.0533	94.01	93.4226	93.4367	91.1876	89.6669	87.6707	79.8205	71.349	95.2812	95.5006	94.0258	89.5855	86.8203	83.8854	78.3242	68.4583	94.4539	91.156	88.294	86.6527	86.4025	83.5484	73.747	63.727	93.1975	92.7924	91.8317	91.7504	88.7876	86.4004	66.4241	90.7293	91.5145	88.5904	86.3121	83.3333	80.4106	71.7176	60.5405	92.2375
	3.39105	94.558	95.0512	92.2977	90.0072	87.1287	86.1979	79.9031	68.9089	93.8159	93.2189	92.909	88.4682	89.894	87.0074	78.7276	70.0214	94.4052	92.1335	94.0937	90.3734	87.8286	82.62	78.6782	67.3333	94.8962	91.0864	86.9357	86.6527	86.6276	82.2581	71.6468	61.7838	91.545	91.926	91.0066	89.9497	88.423	89.0632	61.7661	92.6557	89.7996	87.5785	86.3512	85.5769	78.3576	69.8353	60.0491	92.9839
	3.45363	97.3757	92.975	95.2104	89.5022	87.0263	84.375	80.4681	66.9401	96.8109	92.3458	90.3694	89.5353	87.131	88.9973	78.025	68.9936	97.8525	92.7592	92.2946	89.7568	87.4325	84.8902	78.5995	66.6667	92.5485	92.3398	85.9768	86.0669	86.3125	82.6728	74.1289	61.3353	91.8524	88.6963	90.0578	91.7923	87.7849	85.4018	61.6206	91.4001	92.4276	87.9972	86.273	82.5321	78.7425	70.7765	59.7052	91.939
	3.51682	96.0497	96.7861	93.7864	91.8831	86.958	85.1935	81.1542	66.694	94.731	92.4331	92.3483	88.8468	90.0454	87.4756	77.4395	69.1649	95.4507	93.5638	92.668	88.9346	87.7566	82.2851	77.7341	66.8333	97.4821	91.8524	88.8534	87.8661	88.4286	83.0415	74.4153	60.5381	90.9685	89.4053	88.8201	90.871	91.1121	87.3514	62.6395	89.2845	89.4655	88.2415	86.1948	84.4151	78.657	71.7647	60.8354	94.5928
	3.57958	96.9061	94.5961	93.1715	91.3059	88.0505	85.7143	81.7998	65.4635	94.2596	91.0361	90.1385	88.296	89.4398	87.1635	78.2592	68.9507	93.3314	95.5006	93.0075	91.641	87.2164	84.0342	78.3242	67.375	96.6655	89.2061	88.0543	86.9456	85.9973	83.0415	72.7446	61.435	91.6218	88.657	94.0182	91.2898	88.9699	87.0661	62.9306	91.6065	90.7127	89.8116	88.4239	84.4151	73.6527	71.4824	61.3759	90.2803
	3.64233	95.9945	94.8805	93.4304	89.0332	86.719	84.003	79.7417	64.4791	95.9512	90.7159	90.1385	86.8503	85.9198	86.3831	79.1569	67.409	96.9483	93.236	92.1928	91.0586	84.7677	84.2948	77.144	65.5	92.3784	91.156	87.3352	87.2385	87.5732	82.1198	72.0764	60.7374	91.4681	89.2083	89.8515	89.4472	91.4768	88.8255	63.804	91.5033	91.314	88.695	85.7646	83.1731	78.7853	68.7059	59.1155	91.8892
	3.7052	96.2983	95.4778	93.3981	91.1616	86.719	83.8914	78.7732	62.8794	97.1436	89.8428	91.9195	89.432	88.9856	87.2415	79.5863	68.137	95.3094	94.1597	90.4277	90.0651	86.6042	84.2575	77.4587	67.6667	97.8564	91.4694	87.2553	89.4561	87.5281	83.1336	69.7852	59.0932	94.1199	89.1296	91.7079	88.6516	87.7849	87.2087	63.6099	91.4861	89.6882	85.9735	85.8819	80.8494	79.3841	69.7412	60.0983	92.3205
	3.7679	97.6243	96.3595	93.3981	88.9971	87.9481	84.189	78.975	66.735	94.9251	90.3958	91.7876	87.2633	88.5314	86.2661	75.9563	67.3233	96.1854	94.3087	93.5845	92.1206	85.776	83.8854	78.8749	65.0417	94.5219	91.156	89.9321	85.4812	85.2769	81.7512	72.1718	60.6876	92.0446	91.2564	91.0066	94.1374	90.3829	84.213	62.8821	92.3289	92.2717	87.404	84.3176	84.2548	76.6039	67.8588	56.9533	91.1262
	3.83088	96.8232	94.9374	92.9126	90.2597	88.2895	85.9003	80.7506	63.0025	94.4537	93.9756	92.3813	90.3959	87.7366	86.3051	76.7369	67.7088	94.0096	95.888	91.2763	88.4892	86.7483	84.7413	78.1668	65.3333	95.985	92.0613	87.8546	88.4519	86.2674	82.3502	73.222	61.136	93.0822	89.1296	89.1089	89.2379	88.0128	84.6885	61.6206	89.2673	89.0646	88.6602	88.0329	83.3734	78.8281	68.2824	59.3612	91.0931
	3.89355	96.4917	92.8612	93.2039	89.9711	85.7972	84.3378	76.2712	65.1354	91.0982	92.9278	90.996	90.9466	91.2566	87.3195	76.6198	67.7516	94.0096	93.2062	92.3625	92.7372	86.3162	85.5229	76.9079	65.3333	95.7809	92.9318	88.5737	87.4059	83.7461	83.0876	70.7399	61.4848	93.4281	91.5321	89.7277	88.861	89.8815	86.4479	62.9791	89.5597	92.5167	89.0091	86.3903	84.0545	77.6732	68.9412	58.7715	91.3584
	3.95643	96.8232	95.62	92.7832	91.7388	87.914	84.7098	78.5714	64.7662	94.5092	90.5122	92.0515	89.8451	90.8024	86.4222	76.3856	66.1242	95.3659	93.2956	90.5295	89.3457	84.3716	84.0715	76.5932	64.6667	92.7867	92.5139	86.696	88.4519	86.5376	82.4424	71.9332	60.6876	93.9662	90.9807	91.0891	89.196	89.5624	88.2073	61.0383	90.1789	90.8018	88.381	86.8596	84.0545	76.9461	68.6118	56.9042	90.894
	4.0191	95.9392	94.5677	91.6181	91.4502	87.7774	82.8497	76.7151	64.6842	94.2318	92.4331	91.6557	89.5009	88.4179	85.0956	77.4005	68.0942	93.0489	94.7855	89.8506	91.3326	83.9755	82.62	79.0716	63.7083	94.624	91.8524	87.535	87.2385	83.656	80.5991	70.7399	59.6413	91.6987	88.3419	90.0165	86.0972	89.289	85.8298	57.9816	90.4369	90.5345	88.0321	84.2393	80.9295	77.1172	69.9765	57.0025	93.7303
	4.0819	94.9448	96.132	91.165	90.0072	87.675	86.756	78.3293	61.5258	94.5646	92.7241	89.0831	84.475	89.402	84.4713	75.8002	66.5525	93.0771	93.7128	92.5322	91.1271	85.0198	82.8061	77.026	62.2083	92.6846	91.6783	84.6584	88.2427	86.5376	82.3963	72.6969	61.1858	94.2352	91.0201	89.8927	90.2429	91.2489	88.3975	60.4076	90.7465	91.8931	88.4159	85.6472	84.5353	77.6732	66.9647	56.9533	92.8512
	4.14467	98.011	94.5961	93.9482	92.2799	87.675	84.561	78.4907	61.6079	94.5369	90.8324	90.0726	87.4699	88.0015	82.7546	75.1756	65.5675	94.49	94.8749	91.3781	90.8188	85.884	83.476	74.9803	62.6667	94.658	91.8175	86.8957	87.1967	85.502	79.9539	71.6945	59.0433	93.0822	89.681	90.0165	88.8191	87.557	85.0214	61.9117	89.5081	92.4499	89.4278	86.273	83.4135	77.7588	67.2941	57.1007	91.8063
	4.20743	96.5746	94.0557	89.9676	90.7287	86.6507	81.6964	77.2397	60.3363	92.4293	90.5995	91.7876	87.7453	87.3959	85.1346	74.356	66.6381	91.5795	94.0107	89.9525	88.9346	86.6403	81.3175	76.7899	62.8333	98.4689	92.4791	85.6572	84.8954	84.6466	80.7834	70.8831	58.4454	95.5419	86.6483	90.099	90.871	87.5114	87.5892	60.5046	92.9481	89.3318	88.067	84.9824	80.6891	75.7057	67.7647	57.8378	90.612
	4.27018	96.4917	92.8896	90.6796	87.9149	86.3776	82.1057	77.5626	61.4028	95.868	92.2002	90.4683	88.3305	89.2884	86.4612	77.0492	64.4968	91.6078	91.6567	92.5322	89.5512	84.4076	83.5504	77.3407	63.8333	97.4821	90.8774	88.4938	85.6485	85.8622	81.8894	69.9761	58.7942	91.0453	89.5234	86.7162	91.2898	89.7448	85.592	61.1839	90.5229	91.8486	87.9623	85.1779	81.891	77.3311	70.1647	56.2654	93.1
	4.33298	96.7403	96.6155	92.7508	91.7388	85.9679	84.747	78.1275	63.2896	94.6755	91.0361	91.5237	87.1945	88.3422	86.4222	76.6198	66.2099	97.0331	95.0834	89.7488	89.6882	85.9921	82.5084	76.0031	62.5417	95.5087	93.2451	84.8182	85.1883	87.7533	83.0415	68.9737	57.5486	93.1975	87.0815	90.6353	88.6516	89.7903	86.1151	60.2135	90.2821	90.7572	87.753	84.826	83.0529	78.7425	68.5647	57.3464	91.9224
	4.39578	96.8508	93.5438	89.7087	90.4762	86.3435	79.7247	75.9887	60.6645	95.8125	93.5972	91.128	89.0189	85.617	85.1346	75.2537	64.454	98.1068	95.7986	90.869	91.1956	84.0835	80.8336	75.6098	64	94.6921	90.2855	85.7371	86.4017	87.6632	80	70.1193	57.6482	93.1207	87.948	90.6766	89.4891	87.7393	86.1626	59.2916	89.6113	90.9131	86.9156	86.3121	84.4952	75.5346	68.5176	57.2973	91.2092
	4.4585	96.7403	95.2787	91.7152	89.7908	87.5043	82.7381	75.4237	59.8031	92.5679	91.3271	91.2929	86.3683	85.617	85.1736	74.8244	64.2827	94.3769	97.1692	89.036	89.9281	84.7677	81.3175	74.5476	63.375	92.2763	91.9916	88.294	85.7322	85.9973	81.106	68.3532	58.9935	92.6595	89.7991	89.4802	86.474	87.3291	86.7332	60.6016	88.5621	92.3831	87.5087	85.2171	80.7692	76.3045	68.0941	54.7912	90.9106
	4.52127	94.9171	93.8282	89.644	90.0433	85.5582	83.1101	76.8765	60.5414	93.0394	93.3935	89.1821	84.716	87.6987	85.4467	76.0343	66.0385	94.4617	93.7128	90.4277	89.0031	87.4325	79.7544	77.144	62.4583	96.1552	91.8175	87.4151	87.4895	86.7177	79.0783	69.5465	59.4918	93.774	89.6022	89.8102	89.4472	87.01	84.4983	59.2916	91.2281	91.7372	86.6015	82.323	82.1314	75.1497	65.8353	54.5455	92.4697
	4.58425	95.6077	95.4778	92.2006	90.5483	88.0505	80.9524	73.0831	59.9262	90.6545	91.4726	88.3575	86.8158	89.5155	85.7979	74.6682	63.8116	92.2012	94.1597	90.3259	88.592	85.5239	79.7544	73.6821	63	98.8772	91.7131	88.0543	84.8954	84.5115	78.1567	68.3532	57.0005	94.658	87.7117	89.3564	88.8191	89.7448	84.1179	58.4182	89.9725	90.6682	89.8116	84.7869	81.7708	76.6467	65.9765	56.5111	93.0668
	4.64682	94.779	94.1411	90.4207	90.4762	85.1144	82.1801	74.3341	60.8696	91.4032	89.901	89.4129	86.9535	85.352	83.691	74.5511	62.9979	93.388	94.7855	88.425	88.9003	88.5128	80.2382	75.2557	63.7083	94.0456	90.773	86.0967	86.318	86.1324	80.2304	69.8329	58.4454	94.4658	88.1843	89.3977	89.0704	89.5169	86.4004	58.0301	90.0757	88.3742	84.4731	85.921	82.1715	76.4756	67.2941	55.5283	95.5714
	4.70948	95.6354	94.2833	91.877	90.9452	85.4558	81.9568	75.343	60.2953	94.0654	91.0943	89.347	89.2943	87.0931	82.7546	72.6776	64.4111	98.022	95.143	89.5112	89.791	84.6237	82.8805	73.8788	62.5833	93.9095	89.4847	87.0156	85.0209	84.6916	78.9401	67.3986	56.1036	95.1576	89.3265	89.3564	88.0235	88.6509	86.6857	57.739	88.4417	89.9109	85.9735	84.9042	80.8093	74.5081	66.7765	53.4152	91.7233
	4.77232	95.884	91.3823	92.2977	90.0794	85.6606	82.4033	75.0605	58.4495	93.594	92.1129	89.347	86.7814	88.0772	84.3933	73.3411	63.6403	94.1509	91.9845	88.5608	88.7975	85.4519	84.5553	76.6326	62.8333	93.8414	91.3649	87.2952	87.4895	86.6727	80.8295	69.2601	56.3528	91.2375	88.4206	89.0264	87.8141	88.8332	85.1165	58.3697	88.3041	90.49	86.2526	84.5522	80.2083	76.4328	65.4118	52.2359	90.9604
	4.83507	95.3315	94.4824	89.3204	89.3939	86.2069	80.9524	75.0605	59.598	93.7327	89.1735	91.9855	87.0912	88.4936	87.3586	71.8189	63.1692	91.6643	95.59	89.0699	90.5447	86.6042	81.7268	73.8395	59.5833	92.8207	90.4596	89.3728	86.3598	86.1324	80.4608	69.2601	56.851	94.1199	92.0441	88.0363	91.5829	90.2005	85.7822	59.3886	89.9553	90.6904	89.1486	82.9097	82.0513	75.0642	65.0824	52.3342	89.9486
	4.89787	95.442	93.2309	91.7799	89.7547	87.675	82.7009	73.5674	59.1879	94.01	89.7264	91.5237	87.8141	86.0712	85.0566	72.7557	60.7709	96.9765	92.9082	90.8011	88.7975	86.1721	80.6476	74.1935	61.7917	95.917	89.5543	86.7759	86.0251	85.2769	81.2903	68.0668	57.2496	92.0061	87.7905	88.2426	90.1591	87.0556	85.3543	57.3508	89.8005	89.1759	86.9505	83.3007	79.0865	74.9786	64	53.317	90.3467
	4.96072	94.6133	93.2594	93.2362	91.7388	85.6948	82.2917	75.4237	58.9828	92.2906	90.7159	92.0515	88.1928	86.4497	86.149	74.9024	63.4261	98.2198	92.6996	90.3598	90.0993	86.0281	82.6945	74.1149	62.0417	96.1892	90.7033	85.7771	87.6151	84.4665	82.3041	66.6348	57.0005	94.3121	89.484	90.8003	87.3534	87.7393	83.3096	57.7875	90.4541	88.5523	88.4857	82.3621	79.9679	74.5509	65.2706	54.2998	91.9058
	6.41833	84.6685	61.917	33.2039	23.5931	15.8416	10.1562	8.83777	8.65463	84.6644	61.0012	31.2995	22.2375	15.5942	10.2224	11.2412	9.46467	81.5485	62.7235	35.0305	24.1178	16.7807	11.2393	9.91345	9	102.314	65.6685	32.6408	24.5607	16.7942	11.106	8.63962	8.91878	97.6172	63.7653	40.6766	29.9414	13.8104	8.5592	10.3348	100.808	85.4566	42.7425	28.4318	19.5112	15.3978	15.5765	18.3292	99.0877
	6.48105	83.7845	60.4096	33.1068	23.6291	15.8757	10.1562	8.83777	7.95734	82.751	59.7206	30.9037	22.4096	15.6321	10.0663	10.3435	8.8651	81.2376	61.919	33.4691	24.3919	16.5286	11.3137	9.52006	8	98.4348	66.2953	31.9616	23.682	16.4791	10.5069	8.01909	7.57349	95.0038	61.4415	39.1502	30.2345	13.5825	8.03614	8.73362	102.89	83.6526	42.2191	27.8842	19.391	14.8845	14.3529	16.2162	99.9834
	6.54417	85.1657	59.2719	31.9417	24.0981	16.0806	9.93304	8.07103	7.3831	82.5291	59.1676	30.7058	22.5473	15.6321	10.1444	9.40671	8.13704	80.9551	61.7104	33.4012	23.8438	16.2766	11.016	8.49725	7.33333	99.4556	65.2507	31.6021	24.2259	16.6592	10.3687	7.63723	6.92576	95.0423	62.6231	39.2739	30.7789	13.1723	7.70328	7.37506	98.3832	82.1604	44.1382	28.158	19.7115	14.799	14.0706	15.086	97.7608
	6.60678	84.4475	57.7361	33.2039	23.2323	15.7733	10.119	8.43422	7.26005	82.8064	58.44	31.2335	21.9277	15.0265	10.1053	9.25059	7.62313	80.3617	61.4422	33.537	23.8095	16.1325	11.6859	7.82848	6.91667	99.1153	66.9916	31.3224	23.7657	16.344	9.90783	7.06444	6.62681	96.0415	62.308	39.2327	30.5695	13.6281	7.75083	6.21058	102.718	82.5167	42.0098	28.1189	18.6699	14.3285	13.0353	14.6929	96.7159
	6.66945	83.4254	58.3333	32.1359	23.3766	15.8416	9.82143	8.03067	6.76784	81.2812	58.7311	31.3654	22.5129	15.14	9.87124	9.05543	7.15203	81.3507	61.025	33.1636	23.4327	16.3126	10.8671	7.7498	6.83333	95.917	65.6337	32.6009	24.3096	15.9838	10.3226	6.49165	6.2282	93.8893	64.041	39.2327	29.8995	13.5825	7.51308	5.7739	99.742	83.2962	42.7076	27.7278	19.1106	14.4568	13.0353	13.7101	93.7303
	6.73245	84.779	59.5279	33.1715	24.026	15.8416	10.119	7.78854	6.72683	83.7493	59.4587	31.0356	21.9621	15.7078	9.83223	8.54801	7.06638	77.7338	61.77	32.926	23.604	17.0688	11.1277	7.59245	6.29167	97.5842	64.9025	31.7619	23.682	15.4885	10.0922	6.58711	5.87942	94.0046	62.308	38.4901	29.6064	13.3546	7.41797	5.14313	100.292	83.2517	41.6609	28.7837	18.9904	14.4996	12.8471	12.9238	96.7822
	6.7952	83.8674	59.5279	32.6214	23.3045	15.3977	10.3795	7.86925	6.35767	81.0039	57.9162	30.277	21.79	15.4428	10.3394	8.19672	6.68094	79.4575	62.9023	33.2994	23.5012	16.4566	10.8299	7.47443	6.29167	99.4216	67.5139	31.7219	23.3891	16.0288	9.81567	6.68258	5.68012	93.4281	61.4809	39.1089	30.1508	13.2634	7.32287	4.85201	99.14	83.6526	42.7076	27.2976	19.5513	14.2857	12.8471	12.3833	96.7656
	6.858	83.3425	59.3572	32.8479	23.6291	15.3636	10.1935	7.50605	6.1936	82.7232	58.0617	31.5303	22.7194	15.2914	9.44206	7.88447	6.42398	80.0226	61.8296	33.6388	24.2549	16.4926	10.7927	7.0417	6.16667	97.9925	66.3301	30.6432	22.9707	16.0288	9.86175	6.25298	5.38117	93.8509	61.4809	37.4587	30.3183	13.2634	7.13267	4.41533	97.4028	82.784	41.8702	27.0239	18.5096	13.7725	12.1882	11.7936	95.3724
	6.92108	83.8122	58.9875	32.1359	22.619	16.183	9.70982	7.30428	5.9475	82.0022	58.0908	31.0026	22.031	15.0643	9.71518	7.61124	6.50964	79.6553	60.876	32.3489	24.4262	16.4566	10.9416	7.15972	5.70833	99.0133	65.6337	30.9229	23.0962	16.0738	9.81567	6.20525	5.18186	94.1583	60.5356	38.3663	29.4389	13.7192	7.22777	4.31829	100.086	80.5791	42.7425	27.7669	18.7901	13.3447	11.9059	11.2531	96.7822
	6.98375	83.1768	58.6746	32.4595	22.9798	15.6026	9.63542	7.30428	5.9475	81.0039	58.5856	30.343	22.0654	15.405	9.79321	7.72834	6.25268	82.3679	61.472	33.0957	23.7753	16.4926	10.9788	6.92368	5.70833	99.8979	66.0167	31.8018	24.477	16.1639	9.447	6.15752	5.03239	93.3897	59.039	38.8614	30.3601	13.4458	7.08512	4.22125	96.5256	81.1581	42.1493	27.3758	19.0304	13.858	12.0471	11.9902	94.543
	7.0466	84.6961	59.8407	32.4272	23.9538	15.6026	9.82143	7.22357	5.66038	80.3938	58.6729	31.1346	22.4785	15.4428	9.59813	7.45511	5.86724	79.2597	62.5745	32.4508	23.3984	16.8527	11.0532	6.68765	5.45833	98.639	64.4847	30.4035	23.5146	16.1639	9.58525	6.15752	5.08221	92.5442	59.4722	39.4389	29.4807	13.7192	7.56063	4.02717	97.0072	80.4232	41.7306	27.6496	18.8301	14.2002	11.4353	10.8108	96.6993
RAW DATA
		Mn concentrations (uM)
		0	1	5	10	25	50	200	400	0	1	5	10	25	50	200	400	0	1	5	10	25	50	200	400	0	1	5	10	25	50	200	400	0	1	5	10	25	50	400	0	1	5	10	25	50	200	400	0
		4499	4358	4205	4116	4092	4216	4168	4204	4316	4129	4139	4090	4002	4123	4153	4247	4310	4135	4180	4221	4076	4068	4175	4101	3801	3590	3603	3676	3640	3625	3656	3726	3355	3261	3288	3273	3305	3312	3309	6436	6097	6181	5444	6202	5885	6376	6224	6613
		4336	4227	4124	4023	4007	3980	4068	4140	4168	4117	4171	4075	3909	4055	4176	3997	4144	4061	4087	4105	4022	4127	4154	4061	3764	3562	3564	3490	3597	3629	3603	3628	3246	3214	3191	3217	3181	3194	3280	6227	5929	6074	5442	5973	5891	6112	6069	6357
		4297	4209	4169	3881	4049	4075	4024	4105	4177	4049	4092	3975	3842	4017	4245	3974	4211	4060	4038	4109	4095	4040	4030	4000	3677	3551	3538	3534	3591	3563	3536	3590	3266	3224	3223	3255	3225	3194	3197	6176	6048	5884	5392	6050	5935	5845	5968	6670
		4192	4246	3995	3716	3936	4064	3984	4017	4094	4010	4046	3942	3842	4004	4082	4006	4182	3951	4050	4068	3945	3968	4008	3945	3637	3557	3497	3492	3483	3518	3455	3570	3138	3193	3171	3186	3212	3112	3188	6029	5835	5738	5396	5850	5765	5751	5787	6351
		4121	4105	3987	3793	3916	3970	3802	3937	4074	3953	4096	3906	3896	4000	4078	3996	4013	4008	3969	4011	3911	3865	4022	3947	3609	3491	3532	3396	3478	3510	3467	3429	3161	3122	3068	3207	3145	3179	3112	5877	5765	5656	5313	5819	5721	5697	5688	6196
		4064	4144	3871	3704	3974	3942	3848	4018	4048	3965	4051	3837	3794	3889	3990	3910	3979	3975	3914	3959	3897	3787	3887	3765	3578	3454	3418	3359	3434	3457	3460	3538	3188	3087	3135	3172	3133	3164	3111	5930	5617	5556	5303	5843	5632	5668	5426	6082
		4163	4030	3906	3672	3808	3892	3875	3933	4029	3880	3950	3793	3750	3820	4038	3856	4013	3926	3934	3995	3892	3873	3943	3791	3563	3409	3393	3286	3432	3487	3442	3312	3184	3093	3040	3069	3089	3080	3143	5837	5653	5634	5213	5618	5693	5723	5467	6166
		4063	3992	3893	3604	3808	3840	3760	3820	3949	3761	3945	3838	3694	3826	3973	3865	4132	3906	3762	3940	3881	3809	3838	3767	3451	3426	3374	3361	3413	3394	3361	3294	3091	3114	3052	3107	3050	3046	3097	5770	5631	5563	5177	5765	5461	5657	5494	6088
		4020	3943	3802	3629	3798	3820	3769	4003	3937	3817	3871	3712	3678	3857	3887	3944	4053	3959	3983	3956	3777	3751	3764	3759	3476	3416	3311	3293	3321	3349	3417	3230	3046	2872	3043	3028	3013	3048	3031	5774	5618	5347	5201	5643	5519	5681	5326	5844
		3882	3967	3787	3582	3758	3846	3722	3851	3844	3706	3876	3743	3681	3683	3938	3860	4024	3821	3921	3862	3758	3718	3799	3792	3438	3379	3289	3285	3258	3321	3241	3180	3045	2952	3019	3038	3055	2970	2986	5661	5673	5265	5265	5622	5485	5561	5430	5716
		3985	3880	3815	3568	3697	3791	3804	3724	3879	3699	3800	3676	3591	3587	3814	3827	3895	3825	3734	3776	3780	3696	3763	3768	3567	3374	3272	3248	3288	3301	3263	3194	2969	2941	2951	2998	3011	2938	3064	5625	5559	5363	5310	5643	5475	5569	5503	5798
		3859	3937	3708	3510	3621	3687	3740	3775	3875	3679	3730	3651	3639	3614	3871	3825	3946	3728	3753	3886	3680	3719	3623	3631	3291	3258	3265	3101	3215	3142	3180	3179	2955	2897	2913	2962	3005	2832	2945	5684	5636	5246	5228	5599	5515	5514	5461	5828
		3871	3855	3677	3539	3673	3643	3713	3730	3865	3667	3808	3658	3591	3603	3844	3731	3979	3740	3584	3787	3691	3564	3591	3703	3309	3265	3235	3192	3169	3236	3128	3225	2939	2849	2865	2894	2936	2941	2943	5702	5605	5279	5180	5507	5471	5575	5392	5745
		3871	3833	3643	3527	3608	3659	3680	3591	3794	3668	3777	3642	3618	3661	3807	3686	3784	3681	3684	3754	3674	3588	3688	3600	3357	3296	3149	3129	3142	3106	3103	3125	2855	2917	2799	2928	2873	2893	2859	5441	5541	5175	5183	5570	5488	5617	5395	5589
		3824	3852	3685	3495	3601	3708	3627	3703	3743	3701	3765	3562	3563	3537	3768	3740	3806	3643	3687	3669	3618	3597	3659	3616	3309	3293	3161	3124	3160	3180	3082	3055	2844	2812	2790	2915	2942	2808	2809	5338	5469	5265	5179	5605	5380	5490	5329	5771
		3827	3787	3745	3447	3687	3639	3643	3651	3802	3521	3705	3512	3460	3564	3748	3625	3823	3670	3564	3757	3506	3493	3646	3580	3221	3243	3116	3048	3098	3090	3054	3134	2829	2753	2813	2836	2802	2780	2777	5389	5458	5227	5141	5533	5406	5476	5405	5641
		3786	3811	3686	3476	3598	3623	3591	3625	3709	3645	3668	3594	3574	3581	3793	3647	3841	3682	3628	3653	3520	3426	3690	3609	3330	3190	3160	3074	2948	3098	3050	3105	2778	2769	2773	2841	2678	2724	2832	5406	5366	5113	5098	5434	5356	5473	5369	5696
		3747	3760	3629	3415	3551	3584	3539	3666	3689	3527	3704	3603	3447	3511	3700	3718	3727	3571	3619	3606	3532	3563	3639	3432	3282	3226	3079	3136	3031	3117	2915	3081	2731	2716	2808	2824	2833	2764	2767	5372	5263	5239	5016	5403	5265	5410	5276	5651
		3829	3716	3644	3483	3622	3484	3519	3484	3707	3553	3632	3595	3436	3452	3698	3574	3820	3521	3607	3536	3474	3435	3583	3474	3228	3192	3171	2988	3073	3069	3057	3156	2814	2783	2808	2749	2824	2713	2779	5267	5392	5082	5078	5395	5290	5360	5304	5792
		3742	3742	3637	3415	3514	3609	3504	3651	3581	3512	3572	3596	3417	3409	3678	3701	3613	3557	3520	3572	3495	3520	3536	3488	3179	3117	3051	2988	2931	2953	3089	3067	2744	2672	2693	2743	2719	2708	2785	5223	5266	5343	4994	5391	5269	5395	5326	5643
		3677	3692	3600	3372	3532	3484	3511	3592	3686	3448	3595	3530	3407	3492	3593	3635	3739	3557	3452	3583	3531	3437	3463	3455	3295	3113	3094	3099	3002	2982	2959	3031	2726	2664	2766	2762	2710	2683	2695	5319	5294	5053	5046	5326	5249	5197	5343	5546
		3729	3711	3564	3365	3519	3493	3518	3550	3710	3560	3572	3535	3373	3455	3504	3538	3818	3576	3463	3519	3440	3417	3469	3344	3180	3123	3089	2916	3020	3048	2890	3019	2718	2724	2670	2739	2738	2672	2693	5255	5392	5188	4999	5293	5259	5246	5212	5655
		3735	3659	3610	3442	3522	3455	3466	3537	3647	3445	3559	3420	3298	3480	3572	3601	3660	3515	3409	3525	3450	3384	3491	3454	3170	3099	3052	2992	2879	3003	3012	3016	2711	2685	2713	2702	2760	2669	2691	5316	5338	5213	5045	5209	5269	5293	5340	5585
		3609	3720	3561	3293	3519	3519	3488	3538	3589	3451	3468	3476	3326	3448	3563	3453	3639	3502	3440	3560	3324	3351	3480	3411	3119	3102	2993	2980	2951	2994	2924	2938	2676	2620	2713	2682	2697	2669	2720	5366	5306	5178	5021	5338	5172	5254	5341	5555
		3719	3650	3535	3298	3502	3407	3423	3474	3491	3524	3492	3402	3353	3434	3586	3550	3694	3514	3391	3507	3410	3296	3435	3331	3242	3087	3035	2972	2899	2922	2942	3012	2709	2699	2713	2658	2666	2623	2592	5134	5308	5076	4777	5259	5166	5326	5287	5618
		3738	3641	3554	3362	3485	3392	3402	3505	3506	3427	3473	3478	3322	3466	3513	3594	3559	3414	3416	3476	3388	3344	3411	3364	3010	3066	3008	2908	2924	3012	2940	2991	2701	2632	2684	2615	2663	2606	2749	5233	5436	5125	4922	5236	5114	5284	5226	5663
		3646	3672	3553	3291	3409	3439	3462	3499	3522	3415	3447	3448	3238	3439	3564	3487	3677	3517	3381	3362	3283	3345	3303	3456	3097	3056	3011	2921	2899	2976	3004	2914	2688	2624	2625	2726	2687	2603	2602	5288	5252	5039	4930	5410	5174	5310	5219	5513
		3625	3593	3469	3301	3381	3456	3449	3472	3566	3432	3412	3399	3264	3385	3502	3441	3597	3541	3351	3413	3308	3240	3442	3407	3051	3020	2993	2941	2872	2964	2987	2959	2655	2687	2611	2681	2654	2564	2688	5341	5271	5020	4890	5330	5099	5265	5249	5524
		3645	3632	3455	3274	3418	3414	3444	3477	3499	3397	3445	3364	3298	3438	3549	3509	3531	3416	3335	3381	3233	3319	3427	3465	3041	3036	3018	2928	2912	2963	2951	3002	2609	2626	2692	2690	2635	2564	2627	5148	5209	5096	5000	5190	5133	5189	5311	5503
		3655	3578	3458	3341	3481	3349	3501	3443	3480	3407	3467	3341	3209	3315	3472	3498	3442	3463	3341	3449	3342	3313	3401	3404	2962	3004	2973	2886	2903	2953	2948	2990	2685	2608	2609	2634	2699	2629	2649	5170	5370	5123	4833	5299	5061	5217	5258	5521
		3637	3669	3470	3373	3521	3375	3439	3450	3511	3438	3444	3406	3258	3414	3492	3403	3526	3492	3334	3403	3372	3286	3389	3319	3147	3003	2967	2963	2914	2968	2855	2946	2691	2607	2643	2664	2659	2553	2520	5247	5188	4958	5004	5285	5150	5161	5221	5513
		3577	3655	3460	3234	3377	3395	3392	3490	3450	3395	3392	3397	3230	3329	3420	3377	3583	3400	3323	3402	3344	3253	3331	3257	2972	2961	2900	2924	2900	2935	2966	2950	2595	2597	2604	2662	2648	2549	2609	5171	5175	5086	4858	5197	5096	5255	5109	5437
		3559	3554	3332	3276	3425	3329	3322	3415	3524	3387	3405	3409	3327	3342	3473	3492	3466	3391	3371	3422	3303	3207	3361	3300	2923	3001	2985	2959	2931	2903	2889	2958	2603	2587	2626	2565	2603	2546	2599	5146	5165	5144	4863	5197	5106	5195	5170	5476
		3594	3552	3454	3239	3387	3457	3340	3504	3383	3324	3313	3315	3215	3309	3426	3449	3464	3359	3378	3473	3309	3226	3365	3321	3093	3010	2912	2939	2821	2939	2882	2924	2655	2612	2583	2628	2689	2531	2546	5094	5194	4928	4856	5279	5157	5083	5284	5430
		3568	3551	3415	3258	3422	3431	3352	3376	3372	3309	3392	3368	3215	3343	3388	3277	3508	3450	3434	3304	3292	3239	3368	3273	2964	2997	2878	2910	2864	2926	2866	2922	2607	2600	2583	2616	2571	2498	2589	5053	5218	4947	4762	5265	5094	5206	5207	5386
		3625	3563	3464	3286	3447	3391	3361	3405	3409	3475	3410	3435	3248	3335	3416	3368	3516	3376	3333	3405	3348	3255	3385	3348	2971	3001	2876	2913	2874	2882	2921	2913	2583	2560	2569	2641	2594	2547	2568	5175	5123	4911	4880	5189	5092	5294	5173	5344
		3574	3569	3387	3292	3301	3460	3330	3370	3406	3407	3401	3442	3291	3311	3484	3486	3376	3359	3231	3388	3205	3241	3279	3275	3068	3050	2888	2871	2877	2907	2840	2920	2592	2555	2608	2556	2576	2483	2608	5062	5193	5168	4872	5197	5067	5132	5197	5444
		3593	3492	3450	3236	3341	3292	3333	3412	3366	3407	3351	3357	3219	3327	3399	3408	3336	3389	3311	3324	3267	3174	3337	3315	3003	3018	2923	2902	2847	2983	2894	2937	2616	2552	2614	2569	2548	2523	2537	5144	5127	5008	4954	5128	5009	5231	5254	5630
		3571	3545	3399	3240	3407	3296	3332	3471	3441	3359	3371	3419	3252	3352	3464	3297	3438	3379	3236	3281	3262	3228	3314	3285	3024	3014	2898	2896	2875	2891	2857	2883	2652	2625	2610	2558	2593	2583	2591	5151	5186	4963	4827	5150	4900	5021	5149	5336
		3523	3501	3440	3291	3425	3299	3281	3348	3511	3311	3353	3273	3190	3251	3452	3304	3470	3343	3186	3307	3307	3163	3325	3290	2991	2970	2948	2883	2839	2879	2862	2881	2585	2595	2577	2610	2545	2574	2512	5125	5162	4979	4799	5250	5062	5070	5220	5413
		3547	3479	3360	3237	3330	3329	3335	3333	3522	3328	3351	3383	3166	3323	3407	3273	3521	3402	3366	3277	3317	3153	3365	3258	2878	2943	2900	2866	2773	2860	2881	2909	2628	2566	2580	2515	2497	2564	2505	5184	5199	5013	4833	5225	4961	5314	5136	5421
		3567	3479	3395	3191	3360	3387	3345	3413	3418	3331	3346	3373	3177	3282	3395	3251	3383	3407	3278	3335	3345	3275	3276	3230	3108	2999	2882	2934	2888	2886	2873	2921	2638	2560	2547	2576	2581	2554	2475	5096	5141	4946	4590	5101	4985	5180	5244	5364
		3531	3502	3361	3206	3450	3341	3271	3337	3387	3291	3374	3329	3167	3294	3428	3384	3409	3378	3183	3297	3273	3233	3287	3317	2934	2993	2889	2821	2779	2959	2840	2949	2613	2633	2578	2571	2562	2538	2617	5147	5151	5005	4912	5092	4946	5061	5320	5498
		3548	3457	3448	3207	3389	3247	3308	3414	3407	3347	3323	3321	3193	3218	3399	3304	3370	3391	3306	3289	3321	3251	3336	3322	2966	3019	2924	2968	2879	2847	2910	2875	2617	2576	2544	2522	2522	2501	2619	5018	5053	4983	4799	5093	4944	5130	5120	5532
		3462	3468	3379	3297	3438	3357	3253	3347	3418	3356	3306	3241	3216	3280	3394	3409	3425	3286	3282	3235	3235	3224	3395	3323	2949	2999	2914	2800	2827	2903	2807	2905	2561	2485	2499	2590	2530	2583	2514	4989	5149	5006	4747	5188	5030	5117	5125	5434
		3564	3425	3393	3215	3355	3361	3214	3380	3393	3334	3301	3343	3160	3207	3480	3206	3399	3359	3276	3323	3268	3240	3389	3197	2925	2973	2817	2832	2786	2898	2776	2862	2598	2511	2538	2542	2555	2467	2509	5162	5127	4847	4719	5216	4940	5140	5200	5506
		3513	3503	3427	3286	3361	3328	3297	3406	3372	3314	3351	3336	3156	3216	3373	3408	3424	3276	3167	3305	3222	3160	3290	3252	2899	2966	2918	2806	2845	2855	2821	2810	2600	2556	2572	2485	2486	2467	2527	4963	5025	4784	4645	5050	4882	4984	5148	5461
		3472	3526	3391	3186	3420	3311	3316	3438	3437	3295	3391	3313	3112	3251	3299	3339	3309	3356	3228	3366	3226	3204	3269	3260	2949	3007	2918	2972	2796	2870	2840	2829	2527	2541	2556	2525	2530	2516	2534	5152	5056	4983	4849	5073	4991	4954	5054	5403
		3514	3473	3416	3268	3330	3324	3290	3432	3325	3287	3338	3259	3262	3282	3481	3290	3339	3411	3196	3257	3214	3195	3342	3171	2989	3035	2851	2841	2831	2803	2874	2888	2607	2548	2556	2555	2528	2412	2524	4969	5155	4992	4723	5070	4912	4975	5209	5404
		3280	3386	3243	2924	3257	3135	3156	3146	3178	3162	2966	3085	2935	3022	3135	3129	3077	3141	3020	3061	3050	3089	3072	3133	3252	3261	3115	3152	3179	3272	3162	3220	2916	2862	2802	2770	2811	2681	2678	6220	5957	5892	5669	5874	5872	6185	6017	6111
		3296	3350	3153	2984	3159	3072	3154	3143	3212	3172	2994	3122	2899	3012	3094	3137	2989	3132	2958	3026	3027	2989	3127	3100	3216	3269	3189	3195	3066	3228	3044	3175	2801	2705	2731	2741	2733	2641	2700	6146	5845	5717	5463	5974	5838	6015	5705	6138
		3317	3337	3145	2961	3197	3115	3126	3125	3200	3136	2992	3212	2957	2971	3132	2957	3035	3082	2979	3010	2996	2967	3025	3001	3062	3276	2986	3153	3026	3121	3104	3114	2796	2758	2743	2749	2672	2587	2714	6031	5894	5886	5619	5675	5782	5938	5688	6037
		3305	3239	3146	2944	3183	3140	3052	3147	3196	3127	2931	3087	2893	3035	3134	2988	3131	3027	3001	2990	3049	3053	3092	3063	3194	3253	3075	3156	3027	3098	3041	3117	2793	2739	2713	2786	2652	2643	2688	6081	5836	5578	5494	5741	5792	6066	5603	6061
		3348	3372	3206	2926	3219	3107	3140	3101	3142	3056	2952	3157	2886	2966	3095	3075	3045	3107	2961	3024	2996	3044	3103	3019	3165	3217	3079	3153	3079	3092	3038	3147	2776	2737	2645	2756	2684	2657	2710	6083	5780	5636	5594	5782	5790	5913	5632	6098
		3293	3294	3139	2908	3096	3099	3108	3117	3136	3034	2952	3033	2938	3035	3072	3070	3075	3082	2932	2998	2951	3014	3068	3000	3090	3256	3076	3108	3036	3080	2999	3062	2731	2698	2721	2700	2727	2636	2727	5963	5834	5616	5413	5769	5760	6047	5489	6054
		3270	3330	3207	2992	3113	3114	3123	3101	3142	2980	2992	3154	2919	2982	3156	3050	3049	3125	2951	3108	3013	3030	3011	3008	3037	3227	3062	3059	3031	3118	3022	3100	2727	2689	2701	2746	2690	2643	2678	5977	5567	5667	5285	5856	5681	5858	5517	5775
		3191	3340	3101	2966	3138	3005	2967	3133	3165	2987	2973	3062	2846	2948	3040	2954	3127	2996	3001	3022	2920	3002	3010	3015	3132	3220	3027	3113	3002	3061	3024	3095	2803	2710	2641	2755	2770	2553	2645	5897	5643	5535	5364	5654	5703	5783	5697	5954
		3211	3299	3135	2872	3149	3157	3015	3173	3129	3121	2990	3060	2851	3010	3118	3048	3004	3079	2882	3053	2993	2950	3017	3020	3123	3084	3064	3042	3041	3087	2954	3131	2729	2635	2650	2657	2776	2606	2701	5720	5680	5546	5331	5705	5707	5666	5588	5870
		3249	3316	3122	2838	3172	3111	3032	3083	3115	3085	3000	3093	2894	2939	3048	2980	3080	3065	2966	3016	3055	2955	3051	2965	3099	3164	2975	3120	3073	3040	2988	3100	2701	2679	2578	2624	2676	2563	2644	5888	5485	5527	5332	5701	5662	5901	5760	5895
		3215	3231	3168	2927	3118	2969	3131	3105	3084	3023	2841	3082	2770	2937	3076	3077	2977	3136	2929	2941	2996	2934	3007	3062	3051	3158	3059	3075	3039	3048	2917	3126	2722	2611	2568	2741	2665	2568	2557	5801	5747	5489	5266	5637	5621	5813	5668	6093
		3241	3288	3122	2929	3105	3016	3067	3085	3102	3034	2884	3018	2743	2950	3029	3038	3017	3038	2875	2994	2977	2942	2987	3041	3097	3148	2971	3080	2954	2989	2957	3121	2738	2723	2648	2669	2647	2569	2786	5793	5610	5341	5354	5700	5528	5795	5374	5890
		3250	3293	3153	2880	3067	3006	3075	3017	3127	3030	2921	3024	2815	2964	3066	3017	3041	3054	2914	2945	2902	2876	2941	2930	3095	3087	3026	3065	2937	3057	2970	3046	2676	2705	2612	2677	2667	2593	2658	5820	5619	5620	5217	5539	5551	5798	5591	6000
		3248	3208	3096	2936	3097	3010	3048	3041	3108	2991	2894	3033	2840	2908	3106	2948	3067	3038	2891	2977	2856	3000	2998	2981	3294	3288	3070	3036	2960	3042	2970	3152	2749	2694	2602	2728	2656	2598	2531	5722	5639	5627	5230	5738	5501	5713	5653	5996
		3202	3258	3150	2907	3062	3026	3001	3085	3082	2956	2926	3039	2902	2945	3028	3067	2965	3091	2856	2991	2970	2901	3010	2953	3099	3137	2978	2986	3021	3032	2941	3069	2742	2607	2548	2641	2652	2532	2654	5750	5654	5567	5410	5648	5605	5756	5409	5925
		3266	3266	3114	2914	3084	3037	3052	3121	3111	3049	2918	3079	2818	2915	3061	3007	3056	3033	2888	2966	2866	2958	2958	2912	3152	3248	3025	3080	2970	3069	2999	3164	2681	2676	2564	2679	2649	2623	2607	5893	5531	5390	5326	5552	5667	5852	5512	5896
		3153	3248	3102	2875	3163	2944	2997	3092	3069	3081	2891	3025	2868	2954	3023	2935	2964	3099	2873	3081	2922	2899	3017	2963	3129	3089	3000	2969	2934	3056	2988	3070	2685	2666	2612	2704	2710	2619	2534	5748	5743	5576	5204	5518	5558	5692	5591	5907
		3241	3217	3190	2898	3062	3008	3106	2995	3059	3084	2981	3093	2804	2929	3079	2911	3024	3014	2848	2943	2946	2929	3004	2992	3152	3125	3109	3021	2968	3076	2947	3084	2774	2711	2551	2692	2699	2535	2630	5811	5783	5373	5317	5455	5561	5635	5569	5913
		3236	3202	3111	2850	3131	3013	3003	3139	3072	3041	2923	3083	2804	2891	3065	2968	2943	3056	2895	2939	2894	2845	3088	2922	3137	3158	3051	3050	3006	3018	2948	3015	2799	2713	2540	2696	2682	2619	2537	5841	5638	5592	5266	5549	5550	5595	5583	5776
		3251	3186	3127	2862	3086	2980	3070	3027	3054	2960	2921	3028	2810	2916	3084	3001	3052	3035	2967	2945	2929	2934	3007	2887	3199	3070	3006	3089	3013	3086	2940	3051	2721	2722	2626	2676	2661	2490	2628	5815	5656	5392	5234	5454	5593	5686	5601	5815
		3620	3516	3090	2772	2929	2688	2478	2438	3606	3436	3032	2905	2642	2563	2562	2335	3539	3356	2946	2919	2777	2687	2542	2400	2939	2872	2503	2390	2221	2170	2095	2007	2602	2539	2424	2388	2194	2103	2061	5814	4490	2866	2557	2496	2338	2125	2035	6029
		3614	3522	3062	2764	2838	2671	2505	2398	3569	3370	3039	2812	2580	2553	2498	2269	3605	3349	2905	2932	2669	2654	2525	2418	2900	2824	2413	2305	2189	2154	2047	2014	2621	2439	2411	2383	2211	2098	2015	5654	4439	2779	2452	2437	2223	2024	1983	5813
		3642	3550	3089	2691	2853	2636	2428	2311	3511	3386	3026	2817	2545	2531	2474	2296	3389	3355	2888	2928	2739	2571	2530	2338	2906	2805	2348	2344	2197	2087	2014	1939	2548	2441	2321	2336	2228	2108	2007	5553	4316	2829	2416	2431	2218	2070	1956	5768
		3679	3490	3048	2739	2901	2628	2446	2350	3479	3255	2924	2787	2597	2453	2445	2286	3465	3374	2834	2836	2613	2611	2478	2327	3006	2818	2402	2316	2133	2100	2021	1909	2523	2414	2279	2341	2167	2038	1913	5548	4374	2786	2447	2277	2174	2032	1887	5929
		3678	3525	3072	2684	2873	2605	2456	2309	3539	3321	2960	2825	2635	2521	2459	2183	3527	3308	2853	2911	2668	2551	2421	2283	2912	2821	2386	2288	2171	2121	1987	1857	2570	2496	2369	2296	2210	2084	1945	5766	4434	2852	2439	2360	2233	2032	1881	5699
		3590	3457	3062	2702	2821	2512	2390	2285	3546	3285	2921	2772	2551	2525	2421	2190	3453	3173	2885	2874	2672	2536	2477	2238	2997	2816	2451	2304	2170	2063	1965	1825	2503	2468	2307	2305	2159	2039	1887	5692	4288	2767	2331	2342	2155	1995	1895	5554
		3587	3404	3037	2734	2768	2506	2390	2254	3488	3319	2954	2732	2543	2466	2464	2202	3411	3294	2808	2852	2700	2519	2394	2142	2923	2724	2352	2289	2185	2070	1915	1819	2496	2404	2326	2348	2212	2048	1874	5518	4180	2799	2426	2317	2150	1994	1818	5659
		3634	3421	3028	2652	2828	2566	2409	2213	3449	3284	2987	2770	2512	2489	2393	2211	3418	3317	2851	2720	2581	2502	2357	2219	2942	2709	2363	2282	2062	2075	1916	1792	2491	2380	2368	2290	2138	2043	1888	5669	4311	2732	2364	2320	2116	2013	1743	5620
		3665	3441	2933	2709	2835	2564	2400	2184	3499	3201	2866	2653	2609	2488	2399	2134	3538	3267	2794	2753	2642	2512	2328	2195	2861	2723	2339	2224	2131	2040	1891	1786	2525	2317	2283	2279	2140	1997	1850	5569	4203	2700	2354	2318	2128	1939	1782	5648
		3576	3467	2983	2600	2729	2514	2330	2192	3494	3275	2889	2696	2521	2484	2396	2109	3519	3238	2837	2853	2558	2499	2325	2136	2989	2788	2272	2285	2130	2013	1895	1751	2496	2442	2360	2308	2156	2070	1766	5475	4197	2707	2343	2293	2099	1947	1731	5582
		3625	3451	3014	2730	2754	2553	2355	2182	3515	3317	2968	2750	2532	2433	2377	2139	3416	3191	2791	2752	2525	2408	2352	2119	2891	2734	2299	2258	2147	2016	1878	1744	2436	2377	2263	2210	2106	2019	1821	5551	4288	2759	2405	2271	2133	1937	1689	5488
		3579	3404	3004	2602	2666	2495	2292	2137	3475	3189	2820	2722	2495	2407	2355	2087	3418	3194	2882	2857	2572	2440	2334	2169	2978	2794	2295	2214	2093	2036	1867	1688	2472	2372	2277	2265	2103	1985	1760	5411	4192	2650	2313	2274	2068	1839	1700	5637
		3602	3422	3007	2670	2687	2526	2322	2074	3485	3229	2885	2717	2541	2421	2350	2137	3406	3278	2815	2802	2570	2449	2312	2045	3084	2729	2265	2226	2104	2024	1822	1712	2499	2353	2257	2222	2122	2004	1680	5462	4187	2716	2322	2216	2052	1844	1667	5535
		3617	3405	2968	2552	2739	2511	2346	2121	3444	3231	2808	2660	2465	2392	2306	1998	3499	3242	2797	2743	2527	2460	2325	2072	2805	2741	2281	2240	2061	2027	1819	1682	2463	2366	2286	2189	2115	1983	1764	5619	4303	2720	2337	2318	2058	1886	1595	5640
		3614	3408	2971	2565	2725	2461	2298	2060	3546	3277	2877	2730	2452	2402	2317	1958	3434	3199	2768	2850	2526	2392	2256	1991	2938	2686	2286	2215	2066	1991	1841	1664	2468	2334	2303	2265	2107	1998	1731	5730	4277	2710	2342	2258	2059	1878	1605	5732
		3535	3446	2934	2602	2748	2492	2252	2023	3553	3136	2860	2748	2511	2391	2280	2031	3404	3297	2789	2762	2556	2449	2285	2039	2908	2691	2366	2209	2090	2007	1865	1664	2475	2367	2269	2242	2104	1995	1683	5385	4152	2664	2347	2256	2065	1774	1638	5570
		3595	3425	2953	2643	2782	2432	2326	2045	3419	3216	2842	2691	2450	2373	2329	2019	3480	3217	2694	2730	2512	2425	2308	2039	2934	2684	2341	2186	2076	2003	1794	1664	2442	2348	2270	2237	2099	1985	1716	5445	4154	2701	2381	2243	2050	1850	1605	5681
		3540	3453	3023	2610	2634	2486	2276	1950	3432	3279	2831	2678	2393	2343	2195	1991	3423	3144	2774	2688	2545	2430	2264	2039	2914	2728	2262	2181	2055	1995	1783	1602	2455	2378	2219	2269	2072	1968	1693	5478	4264	2676	2336	2254	2017	1801	1574	5591
		3551	3348	2981	2591	2775	2453	2258	1966	3587	3258	2814	2695	2504	2428	2217	2025	3418	3166	2744	2767	2510	2387	2232	1987	2784	2686	2279	2180	2011	1950	1768	1597	2490	2370	2249	2212	2051	1995	1678	5457	4232	2696	2320	2277	2046	1784	1577	5583
		3558	3445	3024	2558	2685	2425	2273	1963	3488	3248	2883	2671	2444	2385	2216	1909	3302	3212	2703	2778	2516	2357	2297	1994	2898	2658	2222	2246	2073	1990	1752	1589	2462	2340	2252	2231	2018	1981	1721	5348	4262	2619	2310	2234	2076	1830	1555	5606
		3572	3399	2946	2567	2731	2404	2189	1921	3588	3301	2852	2712	2523	2350	2327	1985	3316	3195	2808	2786	2507	2391	2298	1959	2969	2677	2288	2222	2042	1968	1742	1584	2442	2361	2286	2172	2064	2019	1664	5513	4123	2685	2445	2258	2072	1766	1565	5626
		3561	3338	2927	2587	2616	2422	2191	1918	3475	3238	2809	2666	2491	2404	2298	1961	3306	3250	2746	2693	2437	2429	2229	1914	2767	2746	2219	2223	2045	1913	1805	1563	2464	2407	2286	2127	2029	1972	1649	5428	4234	2741	2360	2234	2012	1778	1513	5510
		3552	3438	2916	2572	2695	2368	2223	1945	3461	3294	2803	2746	2450	2351	2193	1961	3366	3126	2743	2712	2486	2446	2214	1942	2921	2704	2303	2223	2061	1935	1757	1544	2456	2340	2289	2212	2023	1955	1608	5339	4100	2679	2319	2226	2016	1746	1512	5639
		3533	3440	2985	2608	2600	2429	2235	1932	3395	3176	2856	2729	2496	2411	2234	1913	3329	3182	2716	2683	2479	2405	2242	1957	2908	2678	2286	2159	1990	1929	1722	1546	2432	2324	2247	2180	2102	1956	1631	5330	4177	2708	2291	2241	2033	1786	1484	5638
		3485	3389	2926	2610	2657	2468	2201	1881	3462	3157	2875	2688	2427	2342	2185	1884	3376	3218	2676	2759	2546	2401	2231	1893	2850	2707	2295	2196	2025	1952	1760	1502	2460	2417	2232	2243	2019	1922	1701	5522	4250	2747	2310	2310	1983	1725	1447	5547
		3593	3373	2948	2603	2693	2448	2163	1869	3457	3219	2814	2678	2428	2338	2163	1909	3418	3140	2689	2774	2465	2403	2201	1869	2840	2681	2297	2180	2004	1932	1717	1486	2461	2402	2214	2190	2059	1863	1606	5465	4131	2779	2284	2206	2007	1771	1489	5658
		3500	3371	2975	2589	2722	2449	2148	1844	3546	3234	2820	2691	2475	2446	2215	1880	3494	3187	2733	2728	2536	2365	2178	1877	2863	2658	2247	2180	2025	1945	1735	1515	2502	2391	2203	2209	2089	1891	1583	5330	4236	2607	2321	2185	2034	1756	1476	5774
		3517	3386	2856	2586	2690	2438	2176	1910	3467	3224	2835	2647	2460	2361	2250	1814	3427	3184	2785	2777	2497	2348	2179	1870	2906	2688	2194	2177	1958	1960	1708	1477	2450	2344	2175	2215	2013	1938	1519	5492	4119	2594	2342	2247	2012	1720	1407	5604
		3595	3386	2942	2610	2700	2413	2129	1790	3372	3165	2817	2597	2427	2380	2197	1883	3362	3295	2743	2693	2464	2345	2142	1838	2826	2694	2292	2180	2010	1940	1663	1505	2438	2341	2214	2135	2001	1904	1546	5465	4089	2636	2307	2090	1984	1738	1433	5674
		3575	3377	2997	2596	2632	2314	2136	1861	3449	3176	2760	2644	2411	2281	2194	1873	3372	3176	2669	2703	2508	2351	2162	1843	2804	2655	2306	2164	2012	1874	1679	1461	2494	2320	2236	2239	2032	1911	1538	5228	4143	2599	2283	2148	1943	1690	1404	5550
		3585	3387	2981	2590	2759	2332	2073	1833	3448	3239	2899	2617	2431	2376	2235	1863	3243	3167	2695	2754	2466	2324	2135	1782	2895	2685	2202	2171	2017	1901	1685	1481	2445	2323	2174	2212	2044	1899	1504	5582	4134	2608	2310	2184	1929	1655	1430	5611
		3583	3405	2950	2591	2656	2415	2213	1821	3531	3168	2769	2647	2495	2296	2127	1792	3459	3171	2696	2737	2493	2351	2152	1827	2849	2619	2241	2157	1971	1925	1661	1428	2395	2333	2236	2157	2057	1914	1496	5583	4129	2597	2258	2205	1922	1699	1382	5535
		3525	3384	2878	2542	2654	2324	2139	1814	3460	3244	2811	2604	2409	2270	2138	1791	3391	3230	2744	2674	2519	2331	2158	1832	2835	2654	2202	2101	2008	1896	1666	1452	2410	2355	2243	2214	2023	1874	1531	5330	4206	2575	2265	2187	1966	1684	1365	5538
		3535	3369	2920	2610	2658	2391	2073	1755	3421	3229	2799	2635	2468	2298	2144	1767	3384	3269	2754	2713	2495	2373	2088	1770	2922	2698	2220	2117	1954	1868	1686	1414	2437	2353	2251	2149	2014	1887	1500	5312	4159	2601	2259	2203	1974	1665	1385	5533
		3500	3423	2982	2605	2615	2344	2136	1793	3434	3258	2772	2642	2413	2316	2112	1734	3355	3188	2798	2658	2491	2302	2181	1824	2919	2660	2278	2150	2002	1932	1646	1423	2413	2327	2202	2211	1992	1912	1474	5275	4060	2597	2251	2217	1913	1639	1332	5437
		3537	3382	2858	2569	2670	2383	2128	1774	3466	3169	2880	2689	2433	2262	2118	1792	3351	3207	2697	2689	2440	2368	2126	1771	2801	2647	2230	2128	1952	1882	1667	1418	2468	2314	2241	2184	2047	1867	1468	5428	4152	2590	2243	2173	1949	1628	1313	5620
		3476	3418	2899	2575	2685	2378	2123	1802	3464	3313	2742	2648	2349	2312	2149	1768	3360	3242	2714	2638	2457	2318	2114	1736	2867	2631	2189	2126	2019	1916	1646	1413	2404	2276	2187	2184	2052	1862	1474	5472	4089	2528	2293	2130	1936	1647	1362	5659
		3499	3327	2917	2598	2652	2373	2043	1741	3420	3305	2734	2704	2362	2376	2113	1773	3342	3183	2772	2612	2457	2330	2077	1745	2908	2664	2265	2140	1997	1894	1641	1379	2438	2308	2249	2140	2020	1886	1442	5372	4202	2595	2239	2110	1917	1611	1330	5493
		3532	3383	2968	2567	2606	2366	2066	1735	3483	3317	2847	2713	2420	2276	2089	1752	3359	3157	2724	2688	2507	2321	2112	1726	2785	2692	2246	2123	1967	1851	1624	1390	2422	2345	2265	2189	2012	1832	1434	5426	4128	2641	2283	2178	1882	1612	1353	5571
		3517	3335	2905	2514	2609	2313	2064	1766	3542	3271	2822	2613	2422	2325	2151	1731	3386	3240	2785	2718	2496	2368	2097	1752	2801	2640	2267	2143	1970	1893	1614	1359	2476	2322	2212	2255	1988	1863	1394	5460	4142	2550	2221	2174	1918	1596	1349	5793
		3566	3378	2891	2525	2637	2333	2084	1746	3419	3164	2825	2590	2420	2278	2031	1716	3437	3191	2785	2735	2457	2349	2041	1803	2767	2584	2195	2134	1940	1855	1670	1383	2456	2312	2217	2152	2002	1846	1405	5328	4189	2525	2318	2136	1902	1605	1315	5386
		3516	3386	2864	2560	2586	2308	2068	1746	3450	3148	2871	2599	2400	2319	2109	1716	3373	3199	2698	2721	2482	2277	2061	1728	2905	2615	2261	2086	1964	1834	1612	1355	2431	2326	2199	2143	2024	1849	1411	5363	4209	2569	2246	2085	1941	1629	1307	5486
		3468	3408	2855	2515	2633	2324	1968	1714	3393	3201	2798	2596	2365	2267	2090	1710	3495	3168	2624	2639	2511	2321	2079	1755	2935	2615	2197	2152	1972	1899	1653	1329	2460	2312	2176	2200	1989	1867	1389	5439	4126	2517	2246	2129	1944	1604	1318	5683
		3495	3376	2894	2535	2603	2311	2001	1658	3437	3125	2807	2678	2424	2338	2115	1707	3438	3283	2753	2673	2455	2271	2041	1692	2827	2648	2247	2073	1962	1811	1617	1336	2360	2313	2164	2239	1981	1844	1430	5354	4133	2538	2245	2141	1906	1562	1330	5545
		3511	3283	2933	2601	2609	2341	2053	1688	3465	3199	2813	2665	2383	2306	2113	1676	3412	3181	2710	2745	2466	2284	2123	1738	2806	2634	2227	2130	1949	1847	1621	1343	2447	2360	2193	2234	1980	1868	1400	5356	4058	2632	2238	2169	1867	1571	1273	5669
		3505	3384	2900	2571	2670	2331	2029	1658	3418	3239	2749	2671	2315	2327	2048	1700	3381	3227	2687	2709	2505	2339	2059	1725	2951	2689	2283	2120	1964	1842	1542	1333	2402	2253	2197	2203	1978	1896	1385	5323	3981	2544	2274	2086	1905	1555	1315	5549
		3452	3306	2813	2498	2626	2301	2026	1643	3457	3158	2828	2650	2357	2296	2098	1677	3470	3226	2736	2663	2490	2307	2063	1643	2895	2548	2229	2089	1933	1810	1547	1300	2435	2294	2188	2184	1961	1804	1376	5308	4132	2590	2244	2157	1874	1530	1281	5599
		3493	3351	2945	2510	2573	2340	1984	1671	3341	3224	2747	2631	2400	2281	2067	1671	3343	3280	2809	2620	2471	2292	2090	1666	2809	2642	2249	2136	1975	1866	1593	1306	2434	2281	2204	2137	1976	1874	1352	5292	4055	2528	2233	2101	1884	1546	1246	5617
		3505	3368	2849	2539	2598	2268	1991	1623	3397	3188	2807	2604	2368	2257	2049	1632	3415	3257	2688	2694	2513	2282	2021	1688	2941	2643	2247	2073	1930	1839	1546	1308	2430	2353	2198	2099	2034	1825	1381	5205	4198	2576	2235	2161	1862	1538	1280	5486
		3519	3358	2857	2523	2634	2337	2051	1666	3472	3232	2729	2553	2322	2201	2022	1645	3508	3227	2773	2653	2408	2310	2057	1687	2753	2638	2234	2091	1960	1806	1561	1328	2411	2313	2195	2127	1985	1792	1376	5333	4173	2539	2149	2088	1882	1557	1248	5596
		3500	3314	2896	2606	2634	2329	1999	1662	3503	3208	2732	2570	2368	2312	1999	1666	3299	3226	2715	2677	2395	2247	2027	1655	2817	2630	2195	2109	1955	1854	1564	1284	2430	2326	2174	2181	1966	1805	1333	5307	4049	2567	2244	2126	1873	1538	1294	5514
		3467	3430	2898	2528	2617	2308	1998	1621	3458	3123	2783	2658	2393	2236	2028	1659	3345	3252	2728	2651	2416	2262	1996	1655	2737	2610	2155	2136	1931	1775	1554	1309	2437	2294	2167	2193	1972	1776	1367	5079	4038	2558	2269	2094	1901	1538	1263	5512
		3511	3389	2844	2533	2591	2308	1968	1622	3473	3255	2819	2614	2407	2326	2110	1638	3459	3123	2724	2629	2372	2294	2032	1643	2850	2648	2200	2043	1977	1852	1532	1308	2350	2289	2257	2119	1980	1902	1316	5386	4155	2536	2247	2111	1862	1482	1235	5582
		3431	3300	2903	2531	2649	2349	1983	1586	3390	3210	2833	2649	2369	2247	2045	1666	3372	3205	2770	2615	2411	2254	1991	1643	2776	2618	2210	2071	1919	1813	1545	1279	2425	2356	2226	2191	1948	1817	1369	5275	4109	2539	2207	2080	1880	1524	1232	5561
		3423	3342	2852	2495	2552	2317	1980	1680	3383	3203	2817	2570	2375	2230	2017	1635	3341	3092	2772	2638	2439	2220	2000	1616	2789	2616	2176	2071	1924	1785	1501	1240	2382	2334	2206	2148	1940	1873	1273	5387	4032	2510	2208	2136	1832	1484	1222	5606
		3525	3269	2942	2481	2549	2268	1994	1632	3491	3173	2740	2601	2302	2281	1999	1611	3463	3113	2719	2620	2428	2281	1998	1600	2720	2652	2152	2057	1917	1794	1553	1231	2390	2252	2183	2192	1926	1796	1270	5314	4150	2522	2206	2060	1841	1504	1215	5543
		3477	3403	2898	2547	2547	2290	2011	1626	3416	3176	2800	2581	2379	2242	1984	1615	3378	3140	2730	2596	2437	2211	1976	1604	2865	2638	2224	2100	1964	1802	1559	1215	2367	2270	2153	2170	1999	1837	1291	5191	4017	2529	2204	2107	1839	1525	1238	5703
		3508	3326	2879	2531	2579	2304	2027	1596	3399	3128	2733	2565	2363	2234	2005	1610	3303	3205	2740	2675	2422	2258	1991	1617	2841	2562	2204	2078	1910	1802	1524	1233	2384	2251	2279	2180	1952	1831	1297	5326	4073	2574	2261	2107	1722	1519	1249	5443
		3475	3336	2887	2468	2540	2258	1976	1572	3460	3117	2733	2523	2270	2214	2028	1574	3431	3129	2716	2658	2354	2265	1961	1572	2715	2618	2186	2085	1945	1782	1510	1219	2380	2265	2178	2136	2007	1868	1315	5320	4100	2542	2193	2076	1842	1460	1203	5540
		3486	3357	2886	2527	2540	2255	1952	1533	3503	3087	2787	2598	2351	2236	2039	1591	3373	3160	2664	2629	2405	2264	1969	1624	2876	2627	2184	2138	1944	1804	1462	1186	2449	2263	2223	2117	1926	1834	1311	5319	4027	2464	2196	2018	1856	1482	1223	5566
		3534	3388	2886	2467	2576	2263	1957	1627	3423	3106	2783	2535	2339	2211	1946	1572	3404	3165	2757	2689	2382	2254	2005	1561	2778	2618	2251	2043	1894	1774	1512	1218	2395	2317	2206	2248	1983	1771	1296	5368	4143	2505	2156	2103	1791	1442	1159	5494
		3505	3338	2871	2502	2586	2309	2001	1536	3406	3229	2801	2626	2318	2212	1966	1581	3327	3218	2689	2583	2409	2277	1987	1568	2821	2644	2199	2114	1916	1787	1534	1227	2422	2263	2160	2131	1931	1781	1270	5190	3999	2541	2251	2081	1843	1451	1208	5492
		3493	3265	2880	2494	2513	2267	1890	1588	3285	3193	2759	2642	2411	2238	1963	1582	3327	3128	2721	2707	2397	2298	1955	1568	2815	2669	2217	2089	1860	1803	1482	1234	2431	2324	2175	2122	1972	1818	1298	5207	4154	2551	2209	2098	1816	1465	1196	5508
		3505	3362	2867	2543	2575	2277	1947	1579	3408	3110	2791	2610	2399	2215	1957	1544	3375	3131	2667	2608	2343	2259	1947	1552	2727	2657	2170	2114	1922	1789	1507	1218	2445	2310	2208	2130	1965	1855	1258	5243	4077	2533	2221	2098	1799	1458	1158	5480
		3473	3325	2831	2535	2571	2227	1901	1577	3398	3176	2779	2600	2336	2181	1983	1590	3293	3181	2647	2666	2332	2220	2010	1529	2781	2638	2191	2085	1858	1749	1482	1197	2386	2243	2182	2056	1959	1805	1195	5258	4065	2523	2154	2020	1803	1487	1160	5651
		3437	3380	2817	2495	2568	2332	1941	1500	3410	3186	2701	2454	2362	2165	1942	1554	3294	3145	2726	2660	2361	2225	1958	1493	2724	2633	2119	2109	1922	1788	1523	1228	2452	2311	2179	2155	2002	1859	1245	5276	4126	2534	2190	2110	1816	1423	1159	5598
		3548	3326	2903	2558	2568	2273	1945	1502	3409	3121	2731	2541	2325	2121	1926	1531	3344	3184	2692	2651	2385	2243	1906	1504	2782	2637	2175	2084	1899	1735	1502	1185	2422	2277	2182	2121	1921	1788	1276	5204	4151	2563	2206	2082	1818	1430	1162	5535
		3496	3307	2780	2515	2538	2196	1914	1471	3333	3113	2783	2549	2309	2182	1905	1556	3241	3155	2650	2596	2406	2185	1952	1508	2894	2656	2144	2029	1880	1753	1485	1173	2486	2200	2184	2170	1920	1842	1247	5404	4011	2524	2173	2014	1770	1440	1177	5463
		3493	3266	2802	2437	2530	2207	1922	1497	3457	3168	2743	2566	2359	2216	1974	1506	3242	3076	2726	2614	2344	2245	1966	1532	2865	2610	2215	2047	1907	1777	1466	1180	2369	2273	2102	2180	1969	1800	1261	5263	4124	2521	2178	2044	1808	1491	1145	5613
		3502	3397	2866	2543	2518	2278	1936	1543	3414	3128	2775	2533	2334	2215	1963	1546	3434	3191	2644	2618	2388	2217	1932	1501	2807	2678	2123	2036	1949	1802	1445	1155	2425	2211	2197	2117	1970	1811	1241	5249	4075	2515	2169	2073	1841	1457	1167	5542
		3506	3289	2772	2508	2529	2143	1883	1479	3455	3216	2763	2586	2262	2182	1928	1505	3472	3215	2677	2662	2335	2172	1922	1536	2783	2593	2146	2065	1947	1736	1469	1157	2423	2233	2198	2137	1925	1812	1222	5210	4082	2491	2207	2109	1766	1456	1166	5499
		3502	3350	2834	2489	2563	2224	1869	1458	3338	3138	2768	2509	2262	2183	1917	1501	3340	3261	2623	2625	2354	2185	1895	1521	2712	2642	2210	2049	1910	1760	1432	1184	2411	2280	2169	2065	1916	1824	1249	5149	4148	2508	2179	2016	1784	1447	1115	5481
		3436	3299	2770	2496	2506	2234	1905	1476	3355	3209	2704	2461	2317	2190	1948	1542	3343	3145	2664	2598	2428	2143	1961	1499	2826	2637	2188	2091	1926	1716	1457	1194	2440	2275	2177	2136	1909	1777	1222	5304	4119	2482	2105	2050	1757	1399	1110	5575
		3461	3357	2849	2510	2579	2176	1811	1461	3269	3143	2679	2522	2365	2199	1913	1490	3263	3160	2661	2586	2375	2143	1873	1512	2906	2634	2204	2029	1877	1696	1432	1144	2463	2227	2166	2121	1969	1769	1204	5231	4071	2574	2168	2041	1792	1402	1150	5611
		3431	3310	2794	2508	2493	2209	1842	1484	3296	3089	2711	2526	2255	2145	1910	1471	3305	3181	2605	2595	2458	2156	1913	1529	2764	2607	2155	2063	1913	1741	1463	1173	2458	2239	2167	2127	1964	1817	1196	5237	3968	2421	2197	2051	1788	1430	1130	5762
		3462	3315	2839	2521	2503	2203	1867	1470	3392	3130	2709	2594	2301	2121	1862	1504	3469	3193	2637	2621	2350	2227	1878	1502	2760	2570	2178	2032	1881	1713	1412	1126	2476	2268	2166	2102	1945	1823	1190	5142	4037	2464	2171	2017	1742	1419	1087	5530
		3471	3213	2852	2497	2509	2215	1860	1425	3375	3165	2709	2521	2327	2163	1879	1486	3332	3087	2609	2592	2373	2272	1948	1508	2758	2624	2185	2091	1925	1754	1451	1131	2374	2245	2158	2097	1949	1790	1203	5134	4063	2472	2162	2002	1787	1390	1063	5484
		3451	3322	2760	2478	2525	2176	1860	1453	3380	3064	2789	2530	2338	2239	1840	1475	3244	3208	2624	2643	2405	2196	1877	1430	2728	2598	2237	2064	1913	1746	1451	1141	2449	2337	2134	2187	1979	1804	1224	5230	4072	2555	2120	2048	1755	1383	1065	5423
		3455	3278	2836	2488	2568	2223	1823	1443	3390	3083	2775	2551	2274	2180	1864	1419	3432	3118	2675	2592	2393	2167	1886	1483	2819	2572	2172	2056	1894	1764	1426	1149	2394	2229	2139	2153	1910	1795	1182	5221	4004	2492	2130	1974	1753	1360	1085	5447
		3425	3279	2881	2543	2510	2212	1869	1438	3328	3117	2791	2562	2284	2208	1919	1481	3476	3111	2662	2630	2389	2222	1884	1489	2827	2605	2147	2094	1876	1786	1396	1144	2454	2272	2201	2086	1925	1752	1191	5259	3976	2536	2106	1996	1743	1387	1105	5541
		3065	2177	1026	654	464	273	219	211	3053	2096	949	646	412	262	288	221	2886	2105	1032	704	466	302	252	216	3007	1886	817	587	373	241	181	179	2540	1619	986	715	303	180	213	5861	3837	1225	727	487	360	331	373	5974
		3033	2124	1023	655	465	273	219	194	2984	2052	937	651	413	258	265	207	2875	2078	986	712	459	304	242	192	2893	1904	800	566	366	228	168	152	2472	1560	949	722	298	169	180	5982	3756	1210	713	484	348	305	330	6028
		3083	2084	987	668	471	267	200	180	2976	2033	931	655	413	260	241	190	2865	2071	984	696	452	296	216	176	2923	1874	791	579	370	225	160	139	2473	1590	952	735	289	162	152	5720	3689	1265	720	492	346	299	307	5894
		3057	2030	1026	644	462	272	209	177	2986	2008	947	637	397	259	237	178	2844	2062	988	695	448	314	199	166	2913	1924	784	568	363	215	148	133	2499	1582	951	730	299	163	128	5972	3705	1204	719	466	335	277	299	5831
		3020	2051	993	648	464	264	199	165	2931	2018	951	654	400	253	232	167	2879	2048	977	684	453	292	197	164	2819	1885	816	581	355	224	136	125	2443	1626	951	714	298	158	119	5799	3740	1224	709	477	338	277	279	5651
		3069	2093	1025	666	464	272	193	164	3020	2043	941	638	415	252	219	165	2751	2073	970	689	474	299	193	151	2868	1864	795	566	344	219	138	118	2446	1582	933	707	293	156	106	5831	3738	1194	736	474	339	273	263	5835
		3036	2093	1008	646	451	279	195	155	2921	1990	918	633	408	265	210	156	2812	2111	981	686	457	291	190	151	2922	1939	794	559	356	213	140	114	2431	1561	948	720	291	154	100	5764	3756	1224	698	488	334	273	252	5834
		3017	2087	1015	655	450	274	186	151	2983	1995	956	660	404	242	202	150	2832	2075	991	708	458	290	179	148	2880	1905	767	549	356	214	131	108	2442	1561	908	724	291	150	91	5663	3717	1200	691	462	322	259	240	5750
		3034	2074	993	627	474	261	181	145	2957	1996	940	640	398	249	195	152	2819	2043	953	713	457	294	182	137	2910	1885	774	552	357	213	130	104	2450	1537	930	703	301	152	89	5819	3618	1225	710	469	312	253	229	5835
		3011	2063	1003	637	457	259	181	145	2921	2013	920	641	407	251	198	146	2915	2063	975	694	458	295	176	137	2936	1896	796	585	359	205	129	101	2430	1499	942	725	295	149	87	5612	3644	1208	700	475	324	256	244	5700
		3066	2104	1002	664	457	264	179	138	2899	2016	944	653	408	246	191	137	2805	2100	956	683	468	297	170	131	2899	1852	761	562	359	208	129	102	2408	1510	956	704	301	159	83	5640	3611	1196	707	470	332	243	220	5830
[truncated: 40 more columns]

## Sheet: Fig4B
Elen-ts
Lipid to protein ratio 50
Manganese titration
			Same as Fig3E
			no competition ion					2mM Mg
		Mn2+(uM)	V (F/min)					Vi (ΔF.min-1) (+2 mM Mg2+)
		0	0	0	0	0		0	0	0	0	0	0	0	0
		1	5.87069	-1.20237	0.524339	6.25228		3.16346	1.49631	2.29442	5.05024	0.001205	-0.03929	-6.60999	5.38821
		5	9.16053	-5.1553	4.49389	4.2768		4.13608	-0.6572	2.84342	10.3766	0.417493	-1.25808	-8.62481	0.67875
		10	18.7567	2.92604	4.12972	8.68619		2.63239	4.47744	3.57548	6.19346	1.71042	2.2624	0.068133	2.04038
		25	29.7936	7.002	10.4644			9.73307	2.61116	8.91487	2.7046	-3.77162	7.15048	-3.33332	8.17184
		50	43.3636	14.5875	20.965	20.0586		8.21661	4.05797	10.9988	8.69925	-3.79813	6.7584	3.45539	10.5877
		200	67.3058	36.9139	36.912	40.5428		8.12324	7.47926	6.36712	13.8919		6.884	8.17427	10.3315
		400	81.0729	57.864	60.3638	63.1733		16.939	9.34708	13.1085	18.2644	8.38329	19.8693	12.9906	16.734

## Sheet: Fig4C
Elen
lipid to protein ratio 50
Magnesium transport
NORMALIZED DATA																																				Concentrations
			Concentrations (mM)																																	Mean	SEM	N
	Time norm	0	0.8	0.8	1.25	1.25	2.5	5	5		0	0.8	0.8	1.25	1.25	2.5	5		0	0.8	0.8	1.25	1.25	2.5		0	0	0.8	0.8	1.25	1.25	2.5			Time (min)	0 mM Mg2+			0.8 mM Mg2+			1.25 mM Mg2+			2.5 mM Mg2+			5 mM Mg2+
	-5.78222	90.7063	88.8502	90.5923	86.6894	91.1661	88.3959	87.1711	92.8814		106.844	105.056	108.367	102.717	98.1884	102.037	95.7219		101.296	104.745	101.579	103.853	100.178	107.955		83.7563	89.011	87.3626	79.1045	77.027	66.2651	60.5364			-5.78222	94.3228	4.23295	5	95.7071	3.73759	8	90.7606	4.75023	8	89.731	10.5579	4	91.9248	2.51434
	-5.71538	92.1933	89.1986	90.2439	87.0307	92.5795	89.7611	91.1184	93.2203		108.555	102.434	108.367	100.725	97.2826	100.926	96.6132		101.296	102.555	98.7719	104.771	99.4662	108.712		81.2183	89.011	87.9121	76.1194	72.973	64.257	57.8544			-5.71538	94.4548	4.77273	5	94.4503	3.69805	8	89.8855	5.07764	8	89.3134	11.1842	4	93.6506	1.60073
	-5.6491	91.8216	89.547	91.9861	87.372	92.9329	85.3242	89.4737	93.5593		103.612	101.685	107.143	100.362	96.7391	99.8148	96.9697		101.852	101.642	98.5965	102.752	99.2883	106.818		79.1878	88.4615	87.3626	74.6269	73.4234	62.249	57.4713			-5.6491	92.987	4.49298	5	94.0737	3.6707	8	89.3899	5.10448	8	87.3571	10.921	4	93.3342	2.16684
	-5.58253	91.4498	90.5923	90.5923	89.7611	91.1661	84.9829	85.5263	91.1864		104.183	100	106.531	99.6377	96.1957	98.1481	95.7219		99.8148	100	96.6667	100.367	96.9751	104.924		78.6802	86.2637	87.3626	74.6269	72.0721	63.0522	58.6207			-5.58253	92.0782	4.583	5	93.2964	3.47122	8	88.6534	4.85854	8	86.669	10.2249	4	90.8116	2.94918
	-5.51572	91.8216	89.8955	91.2892	89.4198	91.1661	85.6655	87.1711	91.1864		102.471	100.749	105.714	99.8188	96.7391	98.1481	95.1872		99.0741	99.8175	94.7368	101.284	95.5516	103.409		81.7259	84.6154	85.1648	73.1343	73.4234	63.8554	58.2375			-5.51572	91.9417	3.99875	5	92.5627	3.63089	8	88.9073	4.72541	8	86.3651	10.0871	4	91.1816	2.31406
	-5.44913	88.1041	88.1533	90.9408	87.7133	90.4594	85.3242	86.1842	92.2034		101.711	98.8764	105.102	99.4565	96.1957	98.5185	95.0089		98.7037	99.2701	94.5614	99.4495	96.0854	101.894		80.7107	84.6154	84.0659	74.6269	71.1712	64.6586	57.0881			-5.44913	90.769	4.05479	5	91.9496	3.43052	8	88.1487	4.68445	8	85.7062	10.1872	4	91.1322	2.60317
	-5.38257	90.7063	89.1986	90.5923	88.7372	90.8127	84.9829	85.1974	91.1864		101.331	98.8764	103.673	98.3696	94.3841	94.6296	93.2264		97.4074	99.2701	95.0877	97.7982	94.6619	100.947		82.2335	84.0659	81.8681	73.1343	71.1712	62.249	57.4713			-5.38257	91.1488	3.69248	5	91.4626	3.56579	8	87.273	4.70414	8	84.5077	9.59122	4	89.8701	2.40942
	-5.316	90.3346	88.8502	90.5923	87.0307	93.2862	84.9829	84.8684	90.1695		100.76	97.7528	104.694	96.558	93.8406	95.7407	92.8699		97.2222	98.5401	94.386	98.1651	93.0605	101.326		81.7259	84.6154	80.7692	75.6219	69.8198	61.0442	53.2567			-5.316	90.9317	3.61369	5	91.4008	3.39669	8	86.6006	4.83042	8	83.8265	10.7394	4	89.3026	2.35014
	-5.24918	91.4498	87.108	89.547	87.372	89.7527	86.3481	86.1842	89.8305		100.76	95.3184	104.49	96.0145	93.1159	95.3704	92.6916		96.4815	97.9927	93.1579	98.5321	93.9502	101.136		82.2335	82.967	79.1209	74.6269	68.018	59.0361	54.4061			-5.24918	90.7785	3.65138	5	90.1702	3.47213	8	85.7239	5.06554	8	84.3153	10.4238	4	89.5688	1.88308
	-5.18235	88.1041	87.8049	87.8049	88.3959	89.7527	85.6655	87.1711	90.5085		98.8593	96.2547	101.837	96.7391	93.2971	93.8889	92.8699		95	95.9854	95.2632	97.4312	92.5267	98.2955		82.7411	83.5165	80.7692	73.6318	67.5676	59.8394	55.5556			-5.18235	89.6442	3.17156	5	89.9188	3.28813	8	85.6937	4.97324	8	83.3514	9.62777	4	90.1831	1.65313
	-5.11605	88.8476	86.7596	87.8049	86.3481	90.4594	83.6177	83.8816	89.4915		98.0989	96.8165	101.633	96.0145	92.3913	93.8889	91.4439		96.1111	97.2628	93.5088	97.0642	92.7046	100.379		79.1878	83.5165	79.6703	72.1393	65.3153	58.6345	54.4061			-5.11605	89.1524	3.60286	5	89.4494	3.49858	8	84.8665	5.16679	8	83.0729	10.1594	4	88.2723	2.26656
	-5.04923	87.7323	86.4111	87.4564	86.0068	90.106	84.9829	85.8553	88.8136		98.0989	94.0075	99.5918	94.9275	93.6594	92.4074	90.9091		95	95.9854	92.4561	96.5138	93.0605	99.8106		80.203	81.8681	78.022	73.1343	67.1171	58.2329	52.1073			-5.04923	88.5805	3.5197	5	88.3831	3.20791	8	84.953	5.06109	8	82.3271	10.5181	4	88.526	1.46598
	-4.98267	88.1041	87.108	86.4111	84.9829	89.0459	83.6177	84.2105	88.8136		97.3384	94.5693	102.041	96.1957	93.1159	94.6296	91.4439		95.5556	95.8029	93.6842	95.5963	91.9929	98.6742		80.203	81.3187	79.6703	73.1343	65.7658	59.8394	50.9579			-4.98267	88.504	3.52467	5	89.0526	3.32287	8	84.5669	4.94664	8	81.9699	10.8158	4	88.156	2.11381
	-4.9161	89.2193	86.4111	88.5017	85.6655	89.3993	82.9352	84.5395	87.7966		96.1977	94.7566	99.3878	96.3768	93.2971	94.2593	90.3743		94.6296	96.3504	92.1053	95.7798	92.5267	98.6742		79.1878	81.8681	73.6264	72.6368	65.3153	58.2329	52.8736			-4.9161	88.2205	3.37382	5	87.972	3.55395	8	84.5742	5.16416	8	82.1856	10.3175	4	87.5701	1.68818
	-4.84955	85.5019	86.4111	87.4564	83.6177	89.7527	81.9113	84.5395	87.4576		96.1977	95.1311	98.7755	95.1087	92.9348	93.5185	92.1569		95.5556	95.073	90.5263	95.4128	92.1708	99.053		79.1878	79.6703	75.8242	72.6368	66.6667	58.2329	52.4904			-4.84955	87.2227	3.70504	5	87.7293	3.30012	8	84.2371	4.9954	8	81.7433	10.3845	4	88.0513	2.2189
	-4.78272	86.6171	84.3206	85.7143	84.3003	87.6325	79.8635	84.2105	85.7627		95.2471	94.1948	99.5918	95.6522	92.3913	93.3333	90.5526		93.8889	93.9781	90.5263	95.5963	91.637	97.9167		78.1726	81.3187	74.1758	72.1393	64.8649	58.2329	52.1073			-4.78272	87.0489	3.36012	5	86.8301	3.44692	8	83.7884	5.07446	8	80.8052	10.3046	4	86.8419	1.90866
	-4.71628	86.9888	85.3659	85.7143	84.9829	87.6325	80.8874	84.2105	86.7797		96.1977	95.6929	100	96.0145	92.2101	92.037	89.3048		95.1852	94.3431	88.7719	96.5138	93.0605	97.5379		78.6802	80.2198	74.1758	71.1443	66.2162	57.8313	52.4904			-4.71628	87.4543	3.64523	5	86.901	3.59	8	84.3077	5.11459	8	80.7382	10.0327	4	86.765	1.47061
	-4.64945	85.5019	82.5784	85.0174	82.2526	86.2191	81.9113	85.8553	86.4407		95.4373	94.382	99.1837	93.8406	90.2174	91.2963	90.0178		93.8889	96.3504	92.1053	94.6789	92.3488	96.5909		78.6802	82.4176	74.7253	70.1493	66.2162	57.8313	51.7241			-4.64945	87.1852	3.24757	5	86.8115	3.7183	8	82.9506	4.85405	8	80.3807	10.0227	4	87.4379	1.30098
	-4.58288	86.9888	83.6237	83.9721	82.2526	86.5724	80.2048	84.8684	85.7627		96.7681	93.4457	99.1837	96.0145	91.4855	91.1111	90.0178		94.0741	95.2555	88.5965	93.945	92.5267	95.8333		79.1878	80.7692	73.6264	69.1542	66.6667	57.0281	51.7241			-4.58288	87.5576	3.4911	5	85.8572	3.70361	8	83.3114	5.01033	8	79.7183	9.88855	4	86.883	1.58854
	-4.51633	86.2454	82.9268	84.669	81.9113	83.7456	79.5222	85.1974	85.4237		96.5779	92.1348	98.9796	94.2029	91.8478	91.8519	89.8396		92.963	94.3431	90	92.844	91.1032	97.1591		76.6497	80.2198	73.0769	70.1493	64.4144	57.8313	51.341			-4.51633	86.5312	3.74075	5	85.7849	3.5877	8	82.2376	4.89594	8	79.9685	10.2326	4	86.8202	1.51109
	-4.4495	85.5019	82.5784	82.9268	81.2287	84.0989	80.5461	83.2237	84.4068		94.8669	93.4457	98.5714	94.2029	91.1232	91.8519	89.6613		93.1481	93.0657	88.7719	93.3945	89.8577	97.5379		77.665	79.1209	74.1758	69.1542	64.8649	57.0281	50.9579			-4.4495	86.0606	3.51243	5	85.3363	3.56647	8	81.9749	4.90249	8	80.2234	10.3746	4	85.7639	1.9784
	-4.38295	84.3866	80.8362	83.6237	80.5461	85.5124	80.8874	82.8947	85.7627		94.6768	94.7566	98.3673	94.7464	90.942	93.5185	90.0178		91.6667	93.6131	88.5965	94.1284	92.8826	98.2955		78.1726	78.022	74.7253	68.6567	65.3153	57.4297	51.7241			-4.38295	85.3849	3.41341	5	85.3969	3.66363	8	82.6879	5.00125	8	81.1064	10.4598	4	86.2251	2.06921
	-4.31638	82.8996	82.23	82.9268	80.5461	85.159	79.1809	82.5658	85.7627		93.9163	91.3858	98.3673	94.3841	90.0362	91.1111	89.6613		92.7778	93.2482	88.2456	92.844	89.6797	95.8333		78.1726	78.5714	74.1758	68.6567	64.4144	56.6265	51.7241			-4.31638	85.2676	3.4058	5	84.9045	3.52084	8	81.7113	4.92626	8	79.4624	9.88766	4	85.9966	2.05164
	-4.24982	85.8736	80.8362	83.9721	79.1809	83.3922	81.2287	82.8947	84.0678		94.2966	93.8202	97.551	94.3841	90.3986	91.8519	90.3743		92.7778	92.7007	89.1228	91.7431	90.3915	96.4015		76.6497	79.6703	74.1758	70.6468	65.3153	56.2249	52.1073			-4.24982	85.8536	3.47974	5	85.3532	3.41268	8	81.3788	4.88945	8	80.3973	9.95137	4	85.779	2.32251
	-4.183	84.0149	81.5331	82.5784	80.2048	84.0989	80.2048	82.8947	83.0508		95.2471	93.0712	96.1224	93.1159	90.942	89.6296	89.8396		92.2222	92.1533	87.8947	91.3761	90.7473	97.1591		77.1574	78.022	73.6264	69.1542	62.6126	55.0201	52.4904			-4.183	85.3327	3.65911	5	84.5167	3.39344	8	81.0147	5.12627	8	79.871	9.76352	4	85.2617	2.28937
	-4.11642	84.3866	81.8815	84.3206	80.8874	83.3922	80.5461	82.2368	82.7119		95.2471	94.0075	97.9592	91.6667	90.5797	91.4815	89.4831		91.2963	92.7007	87.7193	91.7431	90.3915	96.4015		77.665	76.9231	73.6264	68.6567	63.5135	56.2249	52.1073			-4.11642	85.1036	3.63324	5	85.109	3.59147	8	81.0499	4.88156	8	80.1341	9.91238	4	84.8106	2.34026
	-4.0496	85.5019	80.8362	81.8815	78.8396	83.7456	78.4983	83.8816	82.3729		94.1065	91.7603	97.7551	93.1159	91.3043	91.8519	88.9483		92.4074	90.8759	88.4211	90.4587	90.0356	93.75		77.665	78.022	74.1758	69.1542	63.0631	54.6185	51.7241			-4.0496	85.5405	3.45748	5	84.3575	3.3981	8	80.6477	5.09379	8	78.9561	9.69084	4	85.0676	1.98864
	-3.98303	84.7584	81.5331	81.1847	80.8874	82.6855	79.5222	82.2368	82.7119		94.2966	93.8202	98.3673	93.4783	90.5797	90.1852	88.4135		92.5926	92.5182	87.193	91.9266	88.968	94.8864		77.665	78.022	74.7253	69.1542	64.4144	55.0201	52.1073			-3.98303	85.4669	3.50384	5	84.812	3.53747	8	80.995	4.97	8	79.1753	9.57798	4	84.4541	1.98448
	-3.91648	84.7584	81.5331	82.23	81.57	81.2721	78.157	80.9211	81.3559		94.6768	92.8839	96.7347	93.1159	89.8551	90.5556	89.1266		90.3704	92.3358	87.8947	91.1927	88.4342	94.8864		77.1574	78.022	73.0769	68.6567	62.6126	55.0201	51.341			-3.91648	84.997	3.4113	5	84.4182	3.50586	8	80.3841	4.99067	8	78.735	9.79523	4	83.8012	2.66565
	-3.84992	83.6431	81.1847	82.9268	79.8635	81.9788	77.8157	81.5789	82.7119		95.057	91.573	97.3469	94.2029	90.5797	90	89.3048		92.5926	92.3358	88.0702	91.1927	90.9253	95.0758		75.6345	77.4725	71.4286	68.6567	62.6126	54.2169	52.1073			-3.84992	84.88	3.90471	5	84.1903	3.59511	8	80.6965	5.21918	8	78.7497	9.5908	4	84.5319	2.40877
	-3.78335	83.2714	80.8362	81.5331	77.8157	82.6855	79.5222	82.2368	82.7119		94.2966	92.3221	97.7551	93.1159	90.7609	90.5556	89.6613		92.7778	92.5182	86.3158	90.8257	89.8577	93.9394		75.6345	75.8242	73.6264	67.1642	61.7117	53.8153	52.8736			-3.78335	84.3609	3.99859	5	84.0089	3.64382	8	80.0735	5.23422	8	79.2227	9.30672	4	84.87	2.39958
	-3.71652	84.0149	80.4878	82.23	79.1809	82.6855	78.157	82.2368	82.3729		96.0076	92.6966	97.1429	94.2029	89.6739	90.3704	89.1266		90.9259	92.5182	88.9474	91.0092	89.5018	95.6439		77.665	77.4725	73.6264	68.1592	61.7117	54.6185	53.2567			-3.71652	85.2172	3.65708	5	84.4761	3.57971	8	80.323	5.16258	8	79.357	9.43939	4	84.5788	2.27424
	-3.64997	83.2714	80.4878	82.23	79.8635	83.3922	78.157	81.25	82.0339		94.8669	91.3858	98.1633	94.5652	91.1232	90.5556	87.7005		91.4815	91.7883	87.5439	90.2752	90.2135	96.7803		77.1574	78.022	72.5275	67.6617	60.8108	54.2169	52.1073			-3.64997	84.9598	3.55349	5	83.9735	3.641	8	80.5576	5.32481	8	79.4	9.88669	4	83.6615	2.03217
	-3.5834	83.2714	81.1847	81.5331	78.8396	83.7456	78.4983	80.5921	81.0169		94.2966	91.573	96.3265	92.5725	89.8551	90.5556	88.9483		91.6667	91.7883	88.7719	90.6422	90.2135	95.6439		76.6497	78.022	73.6264	69.1542	61.7117	54.2169	52.4904			-3.5834	84.7813	3.54992	5	84.2448	3.36544	8	80.2246	5.15296	8	79.2971	9.63158	4	83.5191	2.71736
	-3.51683	83.6431	80.8362	80.4878	77.8157	83.0389	77.8157	81.25	80		94.1065	90.824	96.7347	93.2971	89.8551	89.8148	89.4831		90.3704	92.8832	87.3684	91.3761	88.2562	94.1288		75.6345	76.9231	73.0769	69.1542	61.2613	54.2169	51.341			-3.51683	84.1355	3.62506	5	83.9207	3.43564	8	79.8897	5.1778	8	78.2751	9.61839	4	83.5777	2.97466
	-3.45002	83.2714	80.8362	81.5331	78.157	83.0389	79.5222	80.5921	81.6949		95.057	92.8839	98.5714	92.5725	90.2174	89.6296	86.8093		90.9259	91.0584	87.0175	90.6422	89.3238	95.6439		75.6345	78.022	74.1758	68.1592	62.1622	55.4217	52.1073			-3.45002	84.5822	3.70662	5	84.2795	3.56844	8	80.192	4.99512	8	79.2258	9.63196	4	83.0321	1.91523
	-3.38345	83.2714	81.1847	81.1847	79.5222	82.3322	80.2048	81.25	81.3559		93.9163	91.573	95.7143	92.2101	90.2174	89.6296	87.7005		91.1111	91.6058	87.8947	90.2752	90.5694	93.75		77.1574	77.4725	74.1758	68.1592	60.8108	54.6185	50.9579			-3.38345	84.5857	3.44345	5	83.9365	3.35639	8	80.0695	5.15622	8	78.6356	9.65157	4	83.4355	2.13274
	-3.31688	82.1561	79.4425	80.4878	77.4744	81.9788	77.8157	80.2632	81.3559		93.5361	92.5094	95.9184	91.1232	88.2246	89.4444	88.7701		90.7407	91.0584	88.2456	90.8257	88.0783	95.2652		77.665	76.3736	72.5275	68.1592	62.6126	54.6185	52.4904			-3.31688	84.0943	3.44982	5	83.5436	3.52616	8	79.367	4.86874	8	78.7539	9.47611	4	83.463	2.67219
	-3.25007	81.4126	79.0941	80.1394	78.4983	83.0389	78.8396	79.9342	80.339		92.9658	92.3221	96.1224	93.2971	89.1304	89.6296	87.8788		90.1852	91.4234	88.4211	92.4771	89.1459	94.5076		75.6345	77.4725	71.978	68.6567	62.1622	55.0201	50.1916			-3.25007	83.5341	3.44122	5	83.5196	3.55551	8	80.3462	5.09239	8	78.2921	9.92229	4	82.7173	2.58338
	-3.1835	82.5279	79.4425	81.1847	76.7918	82.3322	78.8396	80.2632	80.678		93.5361	91.0112	96.5306	92.5725	89.8551	89.2593	87.8788		91.8519	91.0584	87.8947	89.3578	87.1886	93.3712		76.1421	74.7253	74.1758	67.6617	59.9099	54.6185	53.6398			-3.1835	83.7566	3.88733	5	83.62	3.43865	8	79.0783	5.09061	8	78.7775	8.91978	4	82.94	2.47231
	-3.11667	81.7844	80.1394	81.1847	77.1331	82.3322	78.8396	78.9474	81.0169		93.5361	92.3221	95.7143	92.7536	88.7681	89.4444	87.1658		90.1852	91.4234	86.8421	89.7248	87.0107	95.2652		75.6345	77.4725	71.978	67.6617	60.8108	53.8153	50.9579			-3.11667	83.7225	3.50933	5	83.4082	3.53847	8	79.0436	5.07702	8	78.6268	9.82968	4	82.3767	2.46794
	-3.0501	84.0149	79.0941	80.1394	77.1331	80.5654	78.157	79.9342	78.9831		94.1065	91.7603	97.3469	90.942	89.6739	88.5185	88.2353		91.2963	90.8759	87.5439	90.6422	88.4342	93.5606		75.1269	76.9231	71.978	69.1542	61.2613	53.4137	50.9579			-3.0501	84.2935	3.7667	5	83.4866	3.53551	8	79.0082	5.09963	8	77.7985	9.504	4	82.3842	2.93841
	-2.98327	81.7844	80.8362	79.7909	77.8157	81.9788	77.8157	81.25	80.339		94.1065	91.3858	94.898	93.1159	89.6739	88.5185	85.918		91.2963	91.6058	87.193	89.3578	87.7224	94.697		77.665	76.9231	73.6264	68.1592	62.1622	54.6185	51.7241			-2.98327	84.355	3.53462	5	83.4369	3.34101	8	79.5556	4.96835	8	78.1888	9.48569	4	82.5023	1.72797
	-2.91672	83.2714	79.0941	79.7909	77.4744	80.5654	77.1331	79.2763	77.6271		93.346	91.3858	96.3265	94.0217	89.3116	88.8889	86.631		88.8889	91.2409	86.4912	90.4587	87.3665	92.9924		76.1421	77.4725	71.978	67.6617	61.2613	54.2169	52.4904			-2.91672	83.8242	3.28618	5	82.9961	3.5615	8	79.3346	5.11656	8	77.8762	9.1048	4	81.1782	2.76769
	-2.13075	82.5279	80.4878	81.5331	77.1331	80.212	76.4505	79.9342	79.322		94.6768	91.1985	96.1224	93.1159	88.2246	88.1481	86.2745		91.2963	91.0584	86.6667	89.9083	87.3665	93.5606		75.6345	77.4725	73.6264	67.1642	60.3604	53.8153	51.341			-2.13075	84.3216	3.75146	5	83.4822	3.44092	8	78.767	5.10527	8	77.3751	9.38376	4	81.8436	2.2225
	-2.07775	80.6691	80.1394	80.1394	77.4744	83.7456	77.1331	79.9342	78.9831		92.5856	92.6966	96.1224	92.9348	88.4058	88.1481	87.1658		89.2593	91.2409	87.8947	89.5413	87.0107	92.9924		75.1269	76.9231	72.5275	66.1692	60.3604	53.4137	51.341			-2.07775	82.9128	3.43053	5	83.3663	3.69927	8	79.1108	5.14917	8	77.4037	9.29959	4	82.0277	2.58368
	-2.02472	82.5279	79.4425	80.4878	76.7918	81.6254	77.4744	78.9474	78.6441		93.1559	91.9476	96.1224	92.7536	87.6812	88.8889	87.344		88.5185	89.9635	86.4912	90.6422	89.1459	92.4242		75.6345	77.4725	74.7253	67.6617	59.9099	55.0201	51.341			-2.02472	83.4619	3.29815	5	83.3553	3.3664	8	79.1963	5.0954	8	77.5321	9.29484	4	81.6452	2.85078
	-1.9714	81.7844	80.1394	81.1847	77.8157	80.212	76.7918	79.6053	78.9831		92.9658	90.2622	97.1429	92.5725	88.4058	88.3333	87.1658		91.1111	90.6934	88.2456	89.3578	87.1886	93.75		76.6497	75.8242	71.978	66.6667	63.0631	53.8153	51.341			-1.9714	83.667	3.57895	5	83.2891	3.63155	8	79.0538	4.88826	8	77.554	9.42606	4	81.918	2.63002
	-1.91812	82.1561	79.0941	79.4425	77.1331	80.5654	76.4505	78.6184	78.3051		92.9658	90.4494	95.102	91.3043	89.4928	88.3333	86.2745		89.2593	89.781	85.4386	89.7248	87.0107	93.3712		75.6345	75.2747	74.1758	67.6617	62.6126	54.2169	51.341			-1.91812	83.0581	3.55753	5	82.6432	3.2566	8	79.0076	4.87225	8	77.374	9.37456	4	81.066	2.60582
	-1.8648	85.1301	83.9721	83.9721	80.8874	84.8057	83.2765	80.9211	82.7119		119.392	123.97	127.959	122.283	117.935	121.111	113.191		120.37	122.628	119.825	120.734	112.278	114.583		87.8173	86.2637	81.8681	76.6169	69.3694	59.4378	57.8544			-1.8648	99.7946	8.21278	5	102.601	8.01392	8	95.9661	8.91259	8	94.2063	14.6629	4	92.2745	10.4709
	-1.81177	84.3866	83.9721	86.7596	81.57	86.5724	83.6177	82.2368	81.3559		115.779	123.221	129.184	120.29	117.935	118.889	111.943		119.63	121.35	117.544	119.266	113.523	115.72		88.3249	85.7143	81.3187	75.6219	69.3694	60.6426	57.8544			-1.81177	98.767	7.781	5	102.371	7.88877	8	96.146	8.63524	8	94.0202	14.4496	4	91.8453	10.0521
	-1.75872	86.2454	82.9268	82.9268	81.9113	87.2792	82.2526	82.8947	82.3729		116.54	120.974	124.694	119.022	117.029	117.407	110.695		118.148	122.628	119.649	121.835	112.989	115.152		87.8173	84.0659	81.8681	75.6219	68.9189	61.0442	58.6207			-1.75872	98.5633	7.6945	5	101.411	7.83525	8	96.2536	8.61645	8	93.358	14.093	4	91.9876	9.35501
	-1.70542	85.8736	81.5331	83.2753	82.2526	86.2191	82.9352	82.8947	81.0169		117.681	121.161	128.163	120.471	115.58	117.593	111.052		118.333	120.62	116.842	118.716	111.032	116.288		88.8325	86.2637	82.967	74.6269	68.9189	60.241	57.0881			-1.70542	99.3967	7.61527	5	101.149	7.89883	8	95.4287	8.47085	8	93.4759	14.5407	4	91.6545	9.71376
	-1.6521	84.0149	83.2753	85.0174	82.5939	84.4523	82.5939	81.5789	81.3559		117.49	119.288	125.714	119.928	117.572	118.333	111.765		119.444	120.073	117.719	120.367	111.388	115.909		86.802	85.1648	81.8681	76.6169	67.5676	57.8313	56.705			-1.6521	98.5833	8.1356	5	101.197	7.46233	8	95.2125	8.90606	8	93.3853	14.6959	4	91.5665	10.0993
	-1.5988	86.9888	81.8815	83.9721	82.9352	83.7456	81.9113	79.6053	81.3559		119.011	121.348	126.531	117.935	115.217	117.778	110.517		116.296	120.255	116.667	121.468	112.456	114.015		85.7868	84.0659	83.5165	74.6269	68.018	59.0361	56.705			-1.5988	98.4299	7.87361	5	101.1	7.72136	8	95.1013	8.69478	8	92.6023	14.42	4	90.4927	10.0248
	-1.5455	84.0149	83.6237	84.3206	81.9113	83.3922	81.9113	80.9211	81.0169		116.73	118.539	126.327	119.384	117.029	117.778	111.586		118.148	120.073	116.316	120	110.676	116.667		87.8173	82.967	81.3187	74.1294	68.9189	59.4378	56.3218			-1.5455	97.9355	8.00625	5	100.581	7.60114	8	95.0937	8.66179	8	93.1694	14.8385	4	91.1748	10.2059
	-1.4922	85.8736	83.2753	85.3659	80.8874	84.4523	81.57	82.5658	82.3729		118.441	119.101	126.327	118.478	116.304	118.148	110.695		116.852	119.891	117.018	118.716	112.633	115.909		88.3249	85.1648	82.967	73.6318	68.4685	57.8313	56.3218			-1.4922	98.9313	7.66256	5	100.947	7.5773	8	94.7214	8.73591	8	92.9873	14.8132	4	91.878	9.40879
	-1.4389	86.9888	82.5784	83.6237	80.2048	84.4523	81.2287	80.2632	82.3729		118.631	119.101	124.898	119.565	115.58	117.778	111.052		118.333	119.161	115.789	117.615	110.676	113.636		84.264	84.6154	82.967	74.6269	68.018	58.6345	55.9387			-1.4389	98.5665	8.14419	5	100.343	7.44728	8	94.3432	8.62028	8	92.1454	14.5745	4	91.2292	9.92992
	-1.3856	85.1301	82.23	82.9268	79.8635	85.159	81.2287	81.9079	79.661		116.92	120.599	124.694	119.203	114.674	115.556	110.873		116.111	120.62	115.965	117.982	109.253	117.235		86.2944	83.5165	80.7692	73.1343	68.018	59.8394	55.1724			-1.3856	97.5945	7.73819	5	100.117	7.80675	8	94.2489	8.44085	8	92.2979	14.8985	4	90.8141	10.0506
	-1.33228	83.6431	81.5331	85.3659	81.57	84.0989	81.9113	82.5658	82.3729		118.821	119.101	125.51	118.116	114.493	115.37	110.339		115.926	120.438	115.789	117.064	108.719	114.773		85.2792	85.7143	82.4176	74.1294	68.4685	58.2329	55.9387			-1.33228	97.8768	7.98018	5	100.536	7.57577	8	93.8453	8.38112	8	91.9983	14.3381	4	91.7591	9.28996
	-1.27923	83.2714	82.23	84.3206	80.5461	83.0389	81.57	81.25	81.6949		118.251	119.476	121.633	119.746	113.768	116.667	108.734		115.926	118.431	112.982	117.064	110.498	114.205		85.7868	83.5165	81.3187	73.6318	66.6667	58.6345	55.9387			-1.27923	97.3503	8.07836	5	99.2528	7.26653	8	93.7454	8.61505	8	92.095	14.4645	4	90.5598	9.08822
	-1.22595	84.0149	83.9721	84.3206	81.2287	84.0989	80.8874	82.5658	82.3729		119.392	119.101	123.469	117.029	116.486	115.741	110.517		114.259	119.526	116.842	117.615	109.786	116.288		85.2792	81.8681	82.4176	72.6368	67.5676	58.2329	55.5556			-1.22595	96.9626	8.16769	5	100.286	7.48872	8	94.0055	8.53762	8	92.1179	14.7342	4	91.8185	9.34935
	-1.17265	84.3866	83.9721	84.669	79.8635	83.7456	81.2287	81.25	81.3559		117.3	119.663	123.469	119.384	117.21	117.593	109.091		116.481	118.796	114.386	117.982	111.744	114.394		84.264	82.4176	81.8681	74.1294	67.1171	57.4297	53.6398			-1.17265	96.97	8.1412	5	100.119	7.30405	8	94.3094	8.90157	8	91.7138	15.1208	4	90.5656	9.2627
	-1.11933	83.6431	83.2753	82.23	81.9113	84.0989	81.2287	82.8947	83.0508		119.392	120.787	123.265	117.572	114.13	116.852	108.734		115.926	118.978	114.211	117.431	109.786	114.583		84.7716	84.6154	80.7692	75.1244	67.1171	58.2329	56.3218			-1.11933	97.6695	8.18123	5	99.8299	7.46341	8	93.7851	8.45672	8	92.2464	14.4808	4	91.56	8.58732
	-1.06603	84.0149	82.5784	85.0174	81.2287	84.4523	81.2287	80.9211	80		116.16	120.599	124.286	117.572	114.312	115.556	111.408		114.63	117.518	114.912	117.431	111.388	114.583		84.7716	84.0659	81.8681	72.1393	67.1171	57.4297	54.7893			-1.06603	96.7283	7.6255	5	99.8648	7.53115	8	93.8664	8.59171	8	91.5392	14.6193	4	90.7764	10.3193
	-1.01273	84.0149	83.2753	83.6237	80.5461	81.9788	81.57	81.5789	83.7288		115.97	120.787	124.286	119.022	116.123	115.556	109.269		118.519	119.526	115.614	117.064	109.431	115.53		84.264	82.967	80.2198	72.6368	67.5676	57.4297	55.9387			-1.01273	97.1468	8.21745	5	99.9959	7.71688	8	93.6452	8.70771	8	92.1486	14.4846	4	91.5257	8.89345
	-0.959433	85.5019	84.3206	82.5784	81.2287	83.0389	79.8635	80.5921	79.661		117.871	118.352	124.898	117.21	114.13	115.185	109.982		115.185	117.883	115.088	117.615	113.167	114.394		85.2792	84.0659	78.5714	72.6368	65.3153	57.0281	55.9387			-0.95943	97.5806	7.75073	5	99.291	7.62681	8	93.5917	8.80405	8	91.3453	14.3905	4	90.0784	9.95551
	-0.906117	85.8736	81.8815	83.9721	80.5461	83.0389	79.5222	80.9211	80.339		116.92	118.914	122.653	119.203	114.312	116.296	111.765		117.037	117.701	116.316	117.248	111.388	114.773		83.2487	83.5165	78.5714	72.6368	68.4685	57.8313	55.9387			-0.90612	97.3192	8.03892	5	99.0807	7.60258	8	94.0044	8.61034	8	91.6325	14.6187	4	91.0082	10.3796
	-0.853083	83.6431	81.8815	83.2753	81.2287	81.9788	81.57	80.2632	82.7119		120.152	119.85	123.469	120.833	113.949	116.296	110.517		117.593	117.518	115.088	116.697	111.566	115.909		84.7716	83.5165	82.4176	73.1343	67.1171	58.6345	55.1724			-0.85308	97.9352	8.55993	5	99.5793	7.46044	8	94.0006	8.68367	8	92.2369	14.7952	4	91.164	9.70225
	0	100	100	100	100	100	100	100	100		100	100	100	100	100	100	100		100	100	100	100	100	100		100	100	100	100	100	100	100			0	100	0	5	100	0	8	100	0	8	100	0	4	100	0
	0.0530333	102.23	100.697	98.2578	98.2935	100.707	99.3174	102.632	100.339		102.281	100.749	102.857	100.181	99.8188	99.2593	98.3957		99.0741	101.46	100	99.0826	99.6441	100		98.9848	101.099	101.648	100.498	100.45	99.5984	100.766			0.053033	100.734	0.727402	5	100.771	0.474105	8	99.722	0.273579	8	99.8357	0.352836	4	100.455	1.22418
	0.106083	101.487	99.6516	99.6516	100	102.473	99.3174	102.632	100.339		100.57	100.936	100.816	99.8188	100.181	99.4444	96.9697		99.8148	101.095	99.1228	97.6147	100.712	99.6212		101.523	101.099	102.198	99.5025	100	97.992	98.8506			0.106083	100.899	0.320807	5	100.372	0.371448	8	99.849	0.538348	8	99.3084	0.164835	4	99.9801	1.64427
	0.159117	100.743	100	99.6516	98.2935	101.06	100.341	101.974	102.034		100.951	102.06	102.041	101.449	100.181	99.0741	96.4349		97.963	101.46	100	98.7156	100.178	99.4318		102.03	100.549	104.945	100	102.252	99.1968	101.916			0.159117	100.447	0.671936	5	101.27	0.629888	8	100.166	0.488228	8	100.191	0.633842	4	100.148	1.85637
	0.212417	99.6283	99.3031	98.6063	99.3174	101.06	101.706	100.987	100.339		102.091	103.184	103.469	100.543	100	100	96.7914		98.3333	100.73	99.1228	98.3486	99.2883	100.189		101.523	101.648	103.846	99.5025	100	98.3936	101.533			0.212417	100.645	0.715777	5	100.97	0.772381	8	99.6189	0.341679	8	100.857	0.443304	4	99.3724	1.30397
	0.265717	100	99.3031	100.348	98.2935	102.473	101.365	101.316	101.695		100.57	100.187	102.449	100	100.362	99.6296	96.7914		99.0741	100.912	100	99.0826	99.1103	101.136		101.015	101.099	104.945	99.5025	101.351	97.1888	103.448			0.265717	100.352	0.374323	5	100.956	0.666313	8	99.7328	0.59691	8	101.395	0.785299	4	99.934	1.57511
	0.319017	102.23	99.3031	101.045	98.6348	100	99.6587	102.303	103.051		102.662	102.622	101.633	100.725	100	98.7037	96.9697		98.3333	102.19	98.4211	98.5321	99.6441	100.568		102.538	100.549	103.297	101.493	101.802	97.992	104.598			0.319017	101.263	0.824926	5	101.25	0.582393	8	99.6662	0.444356	8	100.882	1.29571	4	100.774	1.91456
	0.372333	100.372	97.9094	100.697	98.2935	101.06	101.024	103.289	102.373		101.711	99.0637	103.469	102.174	100	99.0741	97.148		97.5926	101.095	98.9474	99.633	100	101.515		100.508	100.549	101.099	100.498	100.45	98.3936	100.383			0.372333	100.146	0.682409	5	100.347	0.606025	8	100.001	0.456695	8	100.499	0.528523	4	100.937	1.91281
	0.425683	100.372	100.348	101.394	98.9761	101.767	100.683	103.289	104.746		101.711	100.375	102.653	101.449	100.906	99.0741	96.6132		100.185	100.912	98.7719	97.9817	98.7544	101.136		98.9848	100.549	103.297	100	103.153	98.3936	104.598			0.425683	100.36	0.434917	5	100.969	0.516558	8	100.173	0.668166	8	101.373	1.16248	4	101.549	2.5037
	0.478683	101.859	98.9547	100.348	98.9761	102.827	99.3174	101.645	104.407		100.19	100.749	103.878	101.268	99.6377	100	95.3654		97.7778	99.2701	99.8246	100.734	100	102.652		100.508	100	100.549	99.5025	101.351	100	105.747			0.478683	100.067	0.658198	5	100.385	0.546759	8	100.599	0.428266	8	101.929	1.46177	4	100.472	2.67504
	0.531983	98.8848	97.9094	100.697	98.6348	102.827	102.048	105.263	106.78		100.38	99.4382	102.449	100.543	101.087	99.6296	98.2175		99.6296	102.372	99.1228	98.1651	98.0427	102.083		100.508	100.549	102.747	99.5025	102.703	98.7952	103.065			0.531983	99.9903	0.322849	5	100.53	0.642489	8	100.1	0.697014	8	101.706	0.731303	4	103.42	2.63791
	0.585017	98.8848	100.348	100.697	100.341	101.767	102.389	103.947	106.78		99.8099	99.6255	101.429	100.725	101.63	99.2593	97.5045		99.4444	101.642	99.6491	98.8991	98.2206	102.083		100.508	103.846	101.099	100.995	100	98.3936	104.598			0.585017	100.499	0.877398	5	100.686	0.268789	8	99.997	0.488803	8	102.082	1.0951	4	102.744	2.74432
	0.638067	98.513	98.2578	103.484	97.6109	101.767	102.048	105.592	108.136		100.19	99.2509	102.653	99.6377	100.906	100.741	96.2567		96.8519	101.825	99.8246	99.8165	99.4662	103.03		101.523	100	100	100.498	101.351	99.1968	103.448			0.638067	99.4156	0.799035	5	100.724	0.629466	8	99.969	0.473652	8	102.317	0.601791	4	103.328	3.61116
	0.691367	98.1413	97.2125	100.348	98.6348	103.18	102.389	105.592	109.153		100.38	99.4382	101.837	101.63	100.362	101.481	95.7219		97.7778	102.372	99.8246	97.9817	99.1103	102.652		98.4772	100.549	101.648	100.995	103.153	99.5984	105.364			0.691367	99.0652	0.582635	5	100.46	0.586409	8	100.456	0.707986	8	102.972	0.83595	4	103.489	4.01716
	0.744667	100	98.6063	98.9547	99.3174	103.534	105.461	105.592	109.492		101.521	99.4382	102.857	100.906	101.449	99.6296	100.713		97.963	99.8175	99.8246	100.367	100.178	104.356		100	100.549	102.198	98.01	100.901	100	104.215			0.744667	100.007	0.581567	5	99.9633	0.602934	8	100.831	0.449606	8	103.415	1.29226	4	105.266	2.53939
	0.797983	99.2565	100.697	99.6516	98.9761	101.767	103.072	106.579	108.814		99.8099	100.375	102.653	102.536	101.449	101.852	98.2175		99.0741	100.912	100.175	99.8165	100.534	105.114		100.508	98.3516	101.648	101.493	102.703	100	106.513			0.797983	99.3999	0.361984	5	100.951	0.337142	8	100.973	0.47729	8	104.138	1.03913	4	104.537	3.22478
	0.851267	100.372	99.3031	101.742	100	102.473	103.072	105.921	111.186		100.951	100.562	102.449	100.362	101.087	100.926	99.6435		97.037	100.365	99.8246	100.183	101.068	104.167		99.4924	100	102.747	101.99	102.703	100	104.981			0.851267	99.5703	0.676594	5	101.123	0.451566	8	100.985	0.381584	8	103.286	0.878634	4	105.584	3.33642
	0.904583	101.115	101.045	103.136	98.6348	103.887	104.096	105.921	112.881		100.19	100.936	101.837	102.355	101.268	100.926	98.574		98.3333	101.642	98.9474	101.468	99.8221	104.735		100.508	98.9011	102.198	100.995	104.505	100.803	105.747			0.904583	99.8095	0.516784	5	101.342	0.430794	8	101.593	0.693744	8	103.876	1.04043	4	105.792	4.1307
	0.957883	100.372	101.045	101.394	99.3174	103.887	104.437	106.25	111.864		100.951	99.8127	103.265	103.623	101.812	103.519	99.8217		97.4074	100.912	99.8246	99.633	99.8221	104.356		97.9695	99.4505	101.648	100	102.252	99.1968	105.364			0.957883	99.23	0.679087	5	100.988	0.412025	8	101.193	0.687691	8	104.419	0.377293	4	105.979	3.47906
	1.01118	101.487	98.6063	104.878	100.341	103.18	106.143	109.211	112.542		100.951	99.8127	103.061	101.449	102.899	104.074	101.961		97.963	104.197	100.175	99.4495	100.356	106.25		101.523	101.648	103.297	100.995	101.802	98.7952	108.812			1.01118	100.714	0.698176	5	101.878	0.806657	8	101.034	0.555932	8	106.32	0.970041	4	107.905	3.12365
	1.0645	101.859	99.6516	100	98.6348	103.534	103.754	108.882	113.559		100	100.749	103.878	101.993	101.449	103.148	100.535		99.0741	101.825	100.702	100.367	100.89	105.871		99.4924	100.549	100.549	101.493	102.703	102.008	108.812			1.0645	100.195	0.483825	5	101.106	0.468411	8	101.447	0.53333	8	105.396	1.27949	4	107.659	3.80925
	1.11753	101.859	99.6516	103.136	99.6587	104.947	105.119	108.553	111.864		101.331	100.936	105.306	102.174	101.993	103.704	102.496		98.7037	101.642	98.7719	100.367	100.534	106.25		98.9848	100	101.099	101.493	103.604	100.402	105.747			1.11753	100.176	0.623807	5	101.504	0.713648	8	101.71	0.647328	8	105.205	0.551295	4	107.638	2.743
	1.17058	100.743	100.697	102.091	98.9761	104.24	107.509	109.868	114.576		100.19	99.4382	104.082	101.087	100.906	104.074	102.139		99.8148	102.92	100.702	101.651	101.601	107.576		100	98.9011	101.099	101.493	103.153	100.402	106.897			1.17058	99.9299	0.300519	5	101.565	0.51216	8	101.502	0.572832	8	106.514	0.827443	4	108.861	3.62548
	1.22387	100.743	98.9547	103.136	100.341	103.18	106.143	110.526	114.576		100.76	100	104.082	103.08	102.174	104.259	101.783		99.0741	102.372	100.175	101.468	100.356	106.25		100.508	99.4505	102.747	100	102.703	100.402	106.13			1.22387	100.107	0.352884	5	101.433	0.659479	8	101.713	0.437436	8	105.696	0.479559	4	108.962	3.7752
	1.27718	100	100.697	101.045	100.341	104.947	104.778	110.855	115.932		99.6198	100.375	105.51	104.167	103.442	106.481	103.743		98.8889	102.19	100.877	102.936	102.669	108.144		98.4772	98.3516	103.846	100.498	102.703	100.402	107.663			1.27718	99.0675	0.321512	5	101.88	0.660359	8	102.701	0.577146	8	106.767	0.749174	4	110.177	3.53494
	1.33048	99.6283	101.394	100.697	101.706	104.947	105.461	111.842	114.576		101.901	100	104.286	103.442	103.623	105.556	102.674		99.8148	102.555	100.702	101.284	101.601	107.576		101.523	99.4505	103.297	102.985	104.505	100.803	106.513			1.33048	100.464	0.516397	5	101.989	0.53342	8	102.739	0.558884	8	106.276	0.494079	4	109.697	3.59941
	1.38378	99.2565	102.439	101.045	100.683	107.774	107.85	113.158	116.949		100.57	100	105.306	105.254	102.536	105.741	103.565		98.7037	100.73	100.175	101.835	100.89	109.28		98.9848	100	101.099	101.493	104.955	104.016	108.429			1.38378	99.5031	0.343099	5	101.536	0.602423	8	103.493	0.86785	8	107.825	0.754307	4	111.224	3.98281
	1.43715	101.115	98.9547	103.136	100	106.714	108.874	113.158	117.966		101.521	101.124	106.735	103.261	104.167	105.185	105.169		99.4444	103.102	101.754	101.284	100.356	109.47		99.4924	100	104.945	102.985	103.153	102.008	107.663			1.43715	100.315	0.425928	5	102.842	0.834497	8	102.618	0.779141	8	107.798	0.948539	4	112.098	3.73195
	1.4904	99.2565	101.045	102.439	100.683	106.36	107.167	114.145	119.661		100	100	104.898	103.261	104.167	105.926	103.743		98.5185	101.825	101.579	101.835	101.779	108.333		98.9848	97.8022	105.495	102.488	104.054	103.614	109.195			1.4904	98.9124	0.367029	5	102.471	0.659884	8	103.219	0.627404	8	107.655	0.710672	4	112.516	4.66662
	1.5437	100.743	99.6516	103.136	100.341	105.3	108.874	116.118	120		101.711	100.187	105.918	103.804	102.717	105.185	104.635		99.4444	102.19	101.404	102.936	102.491	107.386		98.4772	101.648	102.747	101.493	103.604	103.213	109.579			1.5437	100.405	0.632673	5	102.091	0.689035	8	103.051	0.495324	8	107.756	0.971098	4	113.584	4.61303
	1.59673	98.8848	100	101.742	100.341	106.714	108.532	114.145	117.966		101.141	100.749	106.327	105.072	102.899	107.593	105.169		97.5926	102.555	101.053	103.67	102.313	108.333		98.4772	101.648	103.297	101.493	102.703	103.614	108.812			1.59673	99.5487	0.786085	5	102.152	0.698337	8	103.416	0.670417	8	108.318	0.260886	4	112.427	3.79268
	1.65005	100.372	100	102.787	101.365	107.42	109.556	115.461	119.322		100.38	101.873	104.694	103.804	103.442	106.481	106.952		99.2593	103.102	102.105	102.385	102.135	109.659		100	98.3516	101.648	100.498	105.405	101.205	109.579			1.65005	99.6726	0.388097	5	102.088	0.52505	8	103.395	0.755217	8	108.819	0.77943	4	113.911	3.65397
	1.70308	102.23	100.348	103.833	102.389	109.894	109.898	115.789	121.695		100.76	100.562	104.898	103.623	103.986	107.593	106.239		98.5185	102.372	101.754	101.835	104.982	109.47		98.9848	100	105.495	103.483	105.405	102.008	109.962			1.70308	100.099	0.660685	5	102.843	0.674481	8	104.265	0.930716	8	109.23	0.556747	4	114.574	4.50294
	1.75638	99.6283	98.9547	103.833	101.365	107.067	110.239	118.421	118.983		100.57	100.562	106.531	105.797	103.261	106.852	108.021		99.0741	102.92	101.93	103.67	103.915	110.227		100.508	100.549	103.846	100	106.306	102.008	108.429			1.75638	100.066	0.304848	5	102.322	0.872781	8	104.174	0.723181	8	108.937	0.81473	4	115.142	3.56393
	1.80968	101.115	101.045	104.181	102.389	108.127	109.215	116.776	123.051		101.331	99.0637	105.714	105.072	104.529	107.407	105.704		98.3333	101.642	101.404	103.303	105.516	110.606		97.9695	100.549	103.297	101.493	104.955	104.819	109.579			1.80968	99.8597	0.711293	5	102.23	0.732985	8	104.839	0.594573	8	109.202	0.666709	4	115.177	5.071
	1.863	101.487	101.045	103.484	102.048	108.127	110.922	120.395	122.034		101.521	99.0637	106.531	105.978	104.348	108.333	107.843		97.5926	101.642	102.632	103.67	103.737	110.606		98.9848	100	104.945	99.5025	105.405	103.614	111.111			1.863	99.9171	0.752204	5	102.356	0.913089	8	104.616	0.656652	8	110.243	0.645029	4	116.757	4.48212
	1.9163	101.859	100	104.878	102.389	108.127	109.898	117.763	124.407		100.76	100.562	106.327	105.616	105.254	106.481	106.952		99.0741	102.19	101.93	104.037	103.737	111.742		99.4924	100	102.747	102.488	105.405	105.622	110.728			1.9163	100.237	0.493304	5	102.64	0.739561	8	105.023	0.599273	8	109.712	1.1411	4	116.374	5.08645
	1.9696	103.346	100	104.878	103.754	107.067	112.287	118.421	124.746		101.901	100.936	106.735	106.159	103.804	107.778	108.2		98.1481	102.92	101.053	103.853	103.203	111.742		98.4772	97.2527	103.846	102.985	104.955	102.008	109.962			1.9696	99.825	1.18217	5	102.919	0.792785	8	104.351	0.578222	8	110.442	1.01746	4	117.122	4.82043
	2.02292	101.115	101.742	103.136	103.072	108.127	113.311	118.092	125.424		101.901	100.375	107.143	104.891	104.167	109.444	108.2		99.2593	102.372	102.807	103.119	104.804	113.258		101.523	99.4505	101.648	101.493	104.505	105.221	110.728			2.02292	100.65	0.543888	5	102.589	0.717631	8	104.738	0.559423	8	111.685	0.959678	4	117.238	4.99045
	2.07622	101.487	101.742	105.575	102.73	109.541	112.287	119.408	124.746		101.331	100	106.735	107.246	103.442	108.333	108.734		98.7037	103.65	101.228	103.303	104.27	113.447		98.9848	99.4505	103.846	102.488	105.856	104.819	111.877			2.07622	99.9914	0.591388	5	103.158	0.796206	8	105.151	0.815446	8	111.486	1.10225	4	117.629	4.70686
	2.12925	100.743	101.045	104.181	104.778	111.307	111.604	120.724	125.424		101.141	101.685	106.327	106.884	102.717	109.444	110.517		97.4074	102.007	102.105	103.486	104.804	112.689		96.9543	99.4505	101.648	100	105.405	103.614	111.111			2.12925	99.1393	0.849987	5	102.375	0.700725	8	105.375	0.962542	8	111.212	0.675219	4	118.888	4.40001
	2.1823	100.743	100	104.53	104.096	109.541	113.993	121.711	123.729		100.76	99.8127	107.755	106.522	104.167	108.704	109.269		99.0741	103.467	103.684	103.119	106.05	112.5		100	98.9011	102.198	102.985	107.207	104.016	112.644			2.1823	99.8958	0.396348	5	103.054	0.900557	8	105.59	0.757611	8	111.96	1.13638	4	118.236	4.52118
	2.23535	102.23	102.091	104.878	104.096	110.954	115.358	122.368	126.441		100.76	100.375	108.163	105.616	104.71	110.37	111.23		97.2222	102.007	102.105	103.303	105.338	113.258		102.03	99.4505	103.297	102.488	106.757	104.016	111.111			2.23535	100.339	0.92521	5	103.175	0.843009	8	105.599	0.85476	8	112.524	1.1257	4	120.013	4.54617
	2.28865	100.743	100	103.484	102.389	107.774	113.311	120.066	127.119		100.951	100.749	106.327	105.616	105.435	108.889	111.23		98.1481	102.007	103.158	105.688	106.762	115.152		101.015	100.549	102.747	102.488	107.658	106.827	113.793			2.28865	100.281	0.539558	5	102.62	0.67544	8	106.019	0.608852	8	112.786	1.35623	4	119.471	4.59629
	2.34195	100.743	101.742	103.833	105.119	110.601	115.017	122.368	127.458		99.8099	100.187	106.735	105.616	106.159	110.37	110.873		97.963	102.007	103.684	104.771	105.694	114.773		100	100	100.549	101.99	107.207	104.819	112.261			2.34195	99.7033	0.463585	5	102.591	0.74732	8	106.248	0.682404	8	113.105	1.1041	4	120.233	4.90505
	2.39525	103.717	101.394	103.833	104.778	110.247	115.358	125.658	130.169		101.141	100.749	106.122	107.246	106.522	111.111	113.191		98.1481	103.102	102.281	104.587	106.228	114.583		100.508	98.9011	104.945	104.975	106.757	105.221	110.728			2.39525	100.483	0.970801	5	103.425	0.666226	8	106.448	0.640563	8	112.945	1.18275	4	123.006	5.07754
	2.44857	101.115	101.394	105.575	104.437	112.721	115.7	123.026	128.814		99.4297	100.936	107.143	105.978	105.072	109.074	113.191		99.0741	103.102	102.807	104.037	104.093	116.098		102.538	101.099	102.747	101.99	106.757	106.024	113.793			2.44857	100.651	0.630699	5	103.212	0.748875	8	106.14	1.00342	8	113.666	1.61128	4	121.677	4.56013
	2.50185	101.487	101.394	105.923	105.802	111.307	114.334	125.987	127.458		99.2395	100.749	108.163	106.884	105.254	112.593	113.725		99.4444	103.102	102.281	104.954	106.406	116.856		98.4772	98.9011	102.747	103.98	107.207	106.426	111.877			2.50185	99.5098	0.520744	5	103.542	0.866543	8	106.78	0.70174	8	113.915	1.1078	4	122.39	4.35299
	2.55517	101.859	99.6516	103.484	103.754	109.894	116.041	125	128.475		100.951	101.124	107.551	106.522	105.072	112.407	113.191		99.4444	102.19	103.158	104.954	106.584	113.636		99.4924	100.549	103.846	103.483	106.757	107.229	112.261			2.55517	100.459	0.456765	5	103.061	0.81591	8	106.346	0.653288	8	113.586	0.874434	4	122.222	4.62559
	2.60847	102.602	100.697	104.878	102.389	110.954	115.017	126.316	129.153		100.19	100	108.367	107.971	107.246	112.037	111.943		98.1481	104.927	102.807	107.523	106.406	116.098		98.9848	101.099	104.945	104.975	110.36	105.622	111.877			2.60847	100.205	0.783117	5	103.95	0.953011	8	107.309	0.953858	8	113.757	1.06308	4	122.47	5.32703
	2.6615	101.487	103.136	105.575	105.461	111.661	118.43	126.316	130.847		99.8099	99.6255	108.367	107.428	104.891	112.593	114.617		97.7778	103.467	103.333	104.771	107.473	115.72		100.508	101.099	104.396	101.493	105.405	105.221	111.877			2.6615	100.136	0.654141	5	103.674	0.923494	8	106.539	0.822912	8	114.655	1.50977	4	123.927	4.83528
	2.71455	101.115	103.136	106.62	103.754	112.014	117.065	125.329	129.831		100.19	99.6255	108.163	108.152	107.609	112.963	113.012		97.2222	103.285	102.281	106.239	106.228	117.992		100	99.4505	104.396	102.985	107.658	107.631	113.793			2.71455	99.5956	0.651158	5	103.811	0.930161	8	107.41	0.824103	8	115.453	1.22481	4	122.724	5.02661
	2.7676	100.743	101.045	104.53	107.85	110.954	116.724	125.987	131.186		100	100	108.776	106.159	105.797	112.037	113.547		97.963	102.007	102.281	105.321	106.94	116.856		101.015	99.4505	106.044	104.478	108.108	106.827	112.261			2.7676	99.8344	0.543038	5	103.645	1.01894	8	107.245	0.628381	8	114.469	1.34081	4	123.573	5.23302
	2.8209	102.23	102.091	103.484	105.461	111.307	118.089	128.618	130.169		100.76	99.4382	106.531	107.428	107.246	113.148	114.973		98.1481	104.015	105.263	105.688	108.719	117.235		102.03	100	101.648	102.488	107.207	105.622	113.41			2.8209	100.634	0.744864	5	103.12	0.783073	8	107.335	0.69289	8	115.47	1.27825	4	124.587	4.82769
	2.8742	101.487	102.091	105.226	104.778	114.488	116.041	125.658	130.508		100.57	100	108.163	109.239	107.79	113.333	116.043		96.8519	102.92	103.333	107.339	107.117	118.371		101.523	100	103.297	103.483	107.207	107.631	113.027			2.8742	100.086	0.858163	5	103.564	0.83812	8	108.199	0.997436	8	115.193	1.25734	4	124.07	4.25072
	2.9275	102.602	101.742	105.923	106.485	112.014	120.137	129.934	131.864		101.901	100.375	107.959	107.79	108.877	114.444	113.904		97.2222	103.832	103.86	107.339	107.473	118.561		98.9848	100.549	103.846	103.483	108.559	108.835	117.625			2.9275	100.252	0.977674	5	103.877	0.821968	8	108.421	0.590469	8	117.692	1.20005	4	125.234	5.69254
	2.9808	101.859	101.742	105.226	106.143	111.661	118.771	130.592	131.186		99.6198	100	106.122	107.428	107.971	113.148	115.508		98.5185	104.197	105.439	107.156	106.762	118.182		97.9695	101.099	104.396	102.985	105.856	106.024	114.559			2.9808	99.8131	0.739925	5	103.763	0.731361	8	107.375	0.665475	8	116.165	1.37052	4	125.762	5.12995
	3.03412	101.859	102.787	104.53	108.191	114.488	118.771	128.289	130.847		102.471	101.311	109.184	108.514	108.152	113.519	117.112		99.8148	102.92	103.86	108.257	107.117	118.75		99.4924	99.4505	102.747	102.985	108.108	107.631	114.559			3.03412	100.618	0.642256	5	103.79	0.837591	8	108.807	0.825842	8	116.4	1.37951	4	125.416	4.21722
	3.08742	101.859	100.348	106.272	106.143	113.074	119.795	130.263	130.169		100	100.375	108.571	108.152	108.877	113.519	114.973		97.5926	102.372	104.211	106.606	108.897	117.803		96.9543	98.3516	102.198	104.478	109.459	106.827	116.092			3.08742	98.9514	0.88731	5	103.603	1.01283	8	108.504	0.781542	8	116.802	1.33062	4	125.135	5.08109
	3.14072	101.859	102.787	106.62	107.167	112.367	121.843	129.934	129.492		101.901	99.8127	108.98	109.058	106.341	115.926	116.934		97.037	102.92	104.035	108.257	107.295	120.455		101.015	100.549	102.198	105.473	108.108	106.024	114.176			3.14072	100.472	0.89625	5	104.103	1.01035	8	108.077	0.708018	8	118.1	1.81835	4	125.453	4.26153
	3.19402	103.346	101.742	105.226	107.85	115.901	122.526	132.566	131.525		101.331	100	108.163	109.058	109.964	115.556	117.825		98.3333	105.292	102.105	106.606	107.829	119.129		100	102.198	105.495	103.483	108.559	108.434	118.391			3.19402	101.042	0.870315	5	103.938	0.922583	8	109.275	1.00796	8	118.9	1.43299	4	127.305	4.74961
	3.24732	104.089	102.091	108.014	107.509	112.721	122.526	130.263	134.915		99.8099	99.6255	108.367	110.507	107.79	114.444	118.36		97.963	104.38	104.035	107.523	106.762	120.265		100.508	100	102.747	105.473	107.658	108.434	116.092			3.24732	100.474	1.00105	5	104.341	1.04298	8	108.613	0.706098	8	118.332	1.85864	4	127.846	4.92951
	3.30037	102.23	103.484	104.181	106.826	114.841	120.819	132.895	131.525		99.6198	103.371	107.755	108.152	108.333	114.074	118.004		98.1481	103.467	103.86	107.156	109.964	122.348		97.9695	100.549	101.648	103.483	108.108	107.229	114.559			3.30037	99.7035	0.79165	5	103.906	0.609835	8	108.826	0.926093	8	117.95	2.12323	4	127.475	4.75195
	3.35367	101.115	102.787	106.969	107.167	115.194	120.819	132.566	132.542		102.662	99.8127	107.551	109.058	108.877	116.481	119.964		98.1481	103.285	104.912	107.523	109.075	119.886		98.4772	97.8022	105.495	104.478	108.108	107.631	115.709			3.35367	99.6409	0.955552	5	104.411	0.875041	8	109.079	0.911783	8	118.224	1.25368	4	128.357	4.19661
	3.40697	102.23	102.439	105.923	108.532	114.488	122.526	132.237	133.22		100.76	101.498	109.592	109.783	108.877	117.037	119.608		97.7778	104.745	104.737	108.073	108.897	119.697		99.4924	100.549	104.396	103.98	105.405	109.237	115.326			3.40697	100.162	0.738916	5	104.664	0.859756	8	109.161	0.892408	8	118.646	1.57504	4	128.355	4.38279
	3.46027	99.6283	103.136	106.62	106.826	114.134	125.256	135.197	131.525		98.8593	100.562	108.776	109.058	108.333	117.222	118.538		97.963	102.92	104.035	107.89	109.075	121.78		99.4924	101.099	103.846	103.483	108.108	108.835	115.326			3.46027	99.4084	0.514974	5	104.172	0.880963	8	109.032	0.774455	8	119.896	2.24197	4	128.42	5.05346
	3.51357	102.974	104.878	104.878	107.509	116.254	122.526	137.5	134.237		99.2395	101.124	107.143	109.42	109.601	118.519	119.251		96.4815	104.927	104.211	107.523	108.363	122.348		98.4772	97.2527	103.297	104.975	107.658	108.835	115.709			3.51357	98.885	1.12812	5	104.429	0.606073	8	109.395	1.02256	8	119.775	1.64067	4	130.33	5.61862
	3.56687	101.859	102.091	106.969	109.898	114.134	122.526	133.882	132.881		101.331	100.562	109.388	110.507	109.239	117.963	121.034		98.5185	102.19	104.035	108.991	109.431	123.485		101.015	101.648	103.846	107.463	107.658	109.237	117.241			3.56687	100.874	0.606062	5	104.568	1.08579	8	109.887	0.671459	8	120.304	1.57884	4	129.266	4.12598
	3.62018	101.115	101.394	104.878	108.191	116.254	121.16	135.526	133.898		102.852	102.06	107.755	109.601	108.877	118.704	119.964		96.8519	103.832	104.035	108.073	110.32	123.106		98.9848	100	102.747	104.478	108.108	108.434	118.008			3.62018	99.9607	1.00771	5	103.897	0.69656	8	109.732	0.973618	8	120.244	1.16922	4	129.796	4.93841
	3.67348	101.859	103.833	105.575	107.509	115.548	122.867	134.539	135.254		100	99.8127	110.408	111.957	111.051	117.778	121.925		97.2222	103.285	104.386	108.624	110.854	121.78		102.03	98.3516	102.198	104.478	107.207	109.639	116.858			3.67348	99.8926	0.947448	5	104.247	1.07534	8	110.298	0.961375	8	119.821	1.47392	4	130.573	4.32884
	3.72678	102.602	103.136	107.666	108.191	113.074	122.184	136.184	134.915		100.951	101.124	108.571	112.319	110.688	117.222	123.173		97.963	106.204	105.263	107.523	111.388	121.212		98.4772	100.549	105.495	105.473	109.009	109.639	114.559			3.72678	100.108	0.848138	5	105.366	0.837459	8	110.229	0.698589	8	118.794	1.7735	4	131.424	4.14185
	3.78008	100.372	103.136	106.62	110.58	114.134	124.232	138.158	136.61		99.0494	99.2509	110	110.326	111.051	119.444	121.034		97.4074	103.832	104.386	109.541	109.075	124.432		101.015	98.9011	103.297	103.98	109.459	109.237	116.092			3.78008	99.349	0.627784	5	104.313	1.08608	8	110.425	0.584507	8	121.05	2.01499	4	131.934	5.46833
	3.83338	102.602	105.226	107.317	107.509	117.314	122.184	138.487	139.322		100.38	99.4382	109.388	110.688	111.051	119.444	122.103		99.4444	103.65	105.088	109.541	112.278	123.106		100	100	103.846	103.98	110.811	111.245	117.625			3.83338	100.485	0.549851	5	104.742	1.02883	8	111.305	0.993522	8	120.59	1.25761	4	133.304	5.60552
	3.88643	102.974	102.787	108.711	109.215	115.901	126.28	139.474	139.661		100.57	103.558	108.571	109.783	110.507	120.37	121.212		98.5185	103.285	105.965	108.807	110.498	123.864		103.046	101.099	104.396	105.97	107.658	108.835	114.176			3.88643	101.241	0.840897	5	105.405	0.816833	8	110.151	0.887171	8	121.173	2.62867	4	133.449	6.11866
	3.93948	102.602	102.439	107.317	109.556	115.901	122.526	138.816	137.627		100.951	99.8127	111.429	110.326	110.507	121.111	124.955		98.8889	103.285	104.211	109.541	111.032	124.432		99.4924	98.9011	106.044	103.98	109.459	108.032	116.858			3.93948	100.167	0.715381	5	104.815	1.23623	8	110.544	0.828642	8	121.232	1.60875	4	133.799	4.43531
	3.99252	101.859	104.53	109.059	108.532	118.021	124.915	138.816	136.949		100.76	99.8127	110	110.507	111.051	119.815	124.421		97.5926	103.65	105.263	110.826	111.388	124.621		99.4924	101.099	104.396	104.975	110.811	109.639	118.774			3.99252	100.161	0.747162	5	105.211	1.1221	8	111.347	1.00658	8	122.031	1.59544	4	133.395	4.5195
	4.04582	100.372	103.833	108.711	108.532	118.375	125.256	139.145	140		100.57	101.685	112.041	113.587	111.594	119.259	123.708		98.1481	104.562	105.614	108.991	111.21	126.136		98.4772	99.4505	103.297	104.478	110.36	111.245	117.241			4.04582	99.4036	0.486573	5	105.528	1.17419	8	111.737	1.09973	8	121.973	2.19591	4	134.284	5.29398
	4.09913	102.602	104.53	107.666	110.58	117.668	128.669	140.789	142.712		100.57	102.996	110.816	112.681	110.87	121.667	125.134		96.4815	104.197	104.386	108.807	112.456	125.568		100	100	103.846	104.478	109.91	110.442	117.241			4.09913	99.9308	0.986223	5	105.364	0.913532	8	111.677	0.965869	8	123.286	2.47224	4	136.212	5.56673
	4.15243	102.23	103.484	108.711	111.263	116.608	124.915	141.447	141.695		99.2395	100.936	110	110.507	112.862	119.074	124.777		95.5556	102.92	107.193	109.174	111.388	127.083		97.9695	101.648	104.396	103.483	107.658	108.835	119.54			4.15243	99.3287	1.22256	5	105.14	1.11185	8	111.037	0.987033	8	122.653	1.98412	4	135.973	5.59844
	4.20573	101.487	105.226	110.105	109.215	115.548	129.01	139.803	141.017		102.091	101.311	110.408	111.775	111.594	122.037	126.56		98.5185	105.474	105.439	108.257	110.32	126.894		100.508	103.297	104.396	103.98	110.811	110.442	117.625			4.20573	101.18	0.804386	5	105.792	1.08369	8	110.995	0.769461	8	123.891	2.54836	4	135.793	4.62997
	4.25903	100.743	104.181	106.969	111.945	116.608	126.621	140.132	141.356		102.281	100	110	112.862	112.862	122.037	123.351		97.5926	104.38	103.86	112.477	111.032	128.03		102.03	102.198	106.593	103.98	109.91	109.237	116.092			4.25903	100.969	0.889104	5	104.995	1.03346	8	112.117	0.799339	8	123.195	2.69123	4	134.946	5.80828
	4.31235	103.346	103.136	108.711	107.85	116.254	126.621	142.434	146.102		101.331	101.311	110.612	112.138	113.768	122.593	126.381		98.1481	103.832	104.561	110.459	113.523	125.568		100	100	103.846	106.468	110.36	109.237	118.774			4.31235	100.565	0.860185	5	105.31	1.09076	8	111.699	0.970651	8	123.389	1.75901	4	138.306	6.05542
	4.36563	102.602	103.484	109.756	110.58	116.608	126.621	143.421	142.034		100.57	100.562	112.653	115.58	115.217	123.148	127.094		98.3333	105.657	104.211	111.376	112.633	127.462		98.9848	102.198	105.495	103.483	109.009	108.434	119.157			4.36563	100.538	0.845281	5	105.662	1.35802	8	112.43	1.09701	8	124.097	1.89294	4	137.517	5.22636
	4.41893	102.602	104.53	109.756	109.898	115.194	127.304	141.776	140.339		101.521	101.873	112.041	114.13	112.138	121.667	124.599		96.2963	106.752	105.965	113.211	112.278	127.841		98.4772	100	102.747	107.96	108.559	109.639	116.858			4.41893	99.7793	1.11529	5	106.453	1.21849	8	111.881	0.824084	8	123.417	2.59422	4	135.571	5.50192
	4.47225	99.6283	103.136	108.362	111.604	118.728	126.621	143.092	145.085		100	100.749	111.02	112.138	112.319	124.63	125.847		97.963	104.015	107.018	111.009	113.701	127.462		99.4924	100.549	106.044	103.98	106.757	111.245	118.391			4.47225	99.5266	0.431677	5	105.54	1.14899	8	112.188	1.1741	8	124.276	2.04963	4	138.008	6.10771
	4.5253	102.602	103.136	109.756	109.898	120.495	130.717	145.066	146.441		100.19	102.996	110.408	111.775	113.225	123.889	127.986		98.8889	104.927	106.14	111.56	112.1	128.409		97.9695	103.297	103.297	107.463	111.261	109.639	119.54			4.5253	100.589	1.03188	5	106.015	1.04695	8	112.494	1.21379	8	125.639	2.47849	4	139.831	5.9358
	4.57833	102.974	104.53	109.756	110.922	118.021	128.669	144.408	146.441		100.19	102.247	110.408	114.674	114.13	124.815	131.194		97.2222	104.38	106.491	111.927	114.235	129.545		98.9848	101.099	104.945	106.468	111.261	108.835	117.241			4.57833	100.094	0.969303	5	106.153	0.980134	8	113.001	1.00585	8	125.068	2.80378	4	140.681	4.77949
	4.63138	101.859	105.923	109.408	111.604	119.788	127.645	141.118	148.475		100.57	100.749	110.612	113.949	115.58	123.148	129.59		99.4444	105.839	107.018	111.009	114.413	129.356		98.4772	104.396	104.945	106.468	109.91	110.843	119.54			4.63138	100.949	1.03014	5	106.37	1.05016	8	113.387	1.15374	8	124.922	2.22087	4	139.728	5.49568
	4.68468	101.115	103.833	109.059	111.945	119.081	131.399	141.776	145.763		99.6198	101.124	112.041	113.225	116.123	125.185	129.59		97.5926	105.474	107.719	111.009	114.413	128.22		101.015	98.9011	102.747	106.468	109.459	110.843	119.54			4.68468	99.6488	0.663524	5	106.058	1.25591	8	113.262	1.12197	8	126.086	2.52393	4	139.043	4.86457
	4.74917	102.23	102.091	108.711	112.628	118.728	130.375	143.75	144.407		101.711	101.685	111.633	115.036	115.761	126.481	133.333		99.4444	106.752	106.667	112.477	116.014	130.303		101.523	100.549	106.593	107.463	110.811	108.835	116.858			4.74917	101.092	0.493644	5	106.449	1.15621	8	113.786	1.1281	8	126.005	3.18151	4	140.497	3.58671
	4.81598	102.602	105.226	110.801	112.628	120.495	131.058	144.737	144.407		100.57	101.685	111.837	115.942	116.123	125.556	131.016		96.1111	105.474	106.667	113.211	114.413	131.629		100	102.747	103.846	103.98	110.36	112.048	118.774			4.81598	100.406	1.20297	5	106.19	1.23553	8	114.403	1.10918	8	126.754	2.99174	4	140.053	4.5196
	4.88255	101.859	104.878	111.15	111.263	118.021	130.717	147.697	149.153		101.331	101.685	111.837	115.761	114.493	126.111	132.086		97.037	105.292	106.316	113.578	115.302	133.523		100	102.198	106.593	107.463	110.811	109.639	116.858			4.88255	100.485	0.939675	5	106.902	1.17298	8	113.608	1.00753	8	126.802	3.64976	4	142.978	5.46262
	4.94912	103.346	104.181	110.453	110.922	122.261	130.034	145.395	147.119		100.38	101.311	113.061	114.493	116.304	125.741	131.373		97.963	106.569	108.246	113.578	115.658	133.523		97.9695	100	105.495	106.468	111.712	113.253	118.008			4.94912	99.9317	0.989627	5	106.973	1.29044	8	114.773	1.24806	8	126.826	3.34263	4	141.295	4.98628
	5.01593	101.859	105.226	112.195	113.993	120.141	131.399	144.408	147.458		101.331	101.311	113.469	115.942	117.754	125.741	131.194		98.1481	106.387	109.123	115.596	117.082	133.712		99.4924	102.747	104.945	104.478	111.712	110.843	118.774			5.01593	100.715	0.833696	5	107.142	1.46177	8	115.383	1.09808	8	127.406	3.32916	4	141.02	4.99107
	5.0825	104.089	104.878	112.892	114.334	119.081	132.423	147.368	147.458		102.471	101.311	112.857	115.036	115.942	128.148	133.512		98.8889	106.934	108.596	114.862	118.149	134.091		99.4924	101.099	105.495	105.97	110.811	109.237	118.391			5.0825	101.208	0.954757	5	107.367	1.40595	8	114.682	1.17928	8	128.263	3.52072	4	142.779	4.63387
	5.14932	101.859	105.923	110.453	113.993	120.495	134.471	149.013	155.932		101.711	102.996	113.469	116.486	115.761	129.259	132.799		99.0741	106.204	107.719	114.862	115.836	134.091		100.508	101.099	104.396	103.98	113.063	110.04	121.073			5.14932	100.85	0.504575	5	106.893	1.25304	8	115.067	1.06087	8	129.724	3.118	4	145.915	6.85545
	5.21588	103.717	106.272	110.105	113.652	120.848	133.447	149.013	152.881		102.281	101.124	112.653	115.399	119.928	129.63	133.333		97.2222	106.204	107.193	113.578	117.082	134.28		101.523	101.099	104.945	104.478	110.36	112.048	120.307			5.21588	101.169	1.08258	5	106.622	1.24476	8	115.362	1.30934	8	129.416	3.20078	4	145.076	5.97658
	5.28247	102.974	105.226	110.105	112.628	120.848	133.106	148.355	146.441		101.521	101.873	112.245	115.399	118.478	127.963	134.046		97.963	107.482	109.825	115.229	117.082	132.765		98.9848	100	103.846	105.97	113.514	110.843	118.774			5.28247	100.289	0.892239	5	107.071	1.2375	8	115.503	1.14904	8	128.152	3.33924	4	142.947	4.48475
	5.34928	104.461	107.317	111.15	111.604	120.848	135.495	149.013	156.61		101.711	101.873	115.51	115.942	118.297	128.704	136.185		98.7037	107.299	109.298	116.514	117.082	134.848		98.9848	101.648	103.846	107.463	110.36	111.647	120.307			5.34928	101.102	1.05325	5	107.97	1.48832	8	115.287	1.31087	8	129.838	3.52659	4	147.27	5.96024
	5.41585	103.717	106.969	109.408	112.969	121.201	134.13	151.316	150.847		100.57	102.247	112.653	117.572	118.478	129.63	134.938		98.8889	106.752	109.825	116.33	118.149	134.659		97.9695	100	106.593	104.478	110.811	112.45	118.774			5.41585	100.229	0.980806	5	107.365	1.14832	8	115.995	1.26149	8	129.298	3.68503	4	145.7	5.38305
	5.48267	104.833	106.272	110.453	113.311	121.201	135.495	151.974	149.831		101.331	100.562	114.286	119.203	118.297	128.333	138.146		97.4074	106.934	109.123	116.147	118.327	136.174		101.523	100.549	105.495	104.478	110.811	113.655	121.456			5.48267	101.129	1.18531	5	107.2	1.46266	8	116.369	1.24356	8	130.365	3.45884	4	146.65	4.29674
	5.54923	103.346	106.969	112.544	116.724	123.322	134.471	155.263	150.847		100.38	100.749	113.265	117.391	120.29	130.741	137.79		99.0741	105.474	110	115.413	118.149	136.364		100	98.9011	107.143	105.97	112.613	112.45	119.923			5.54923	100.34	0.800764	5	107.764	1.44417	8	117.044	1.30106	8	130.375	3.67435	4	147.967	5.24578
	5.6158	103.346	106.969	111.847	113.311	124.382	136.177	151.316	155.593		103.042	101.311	114.49	118.116	118.478	128.889	138.859		98.8889	107.117	110.526	115.963	119.573	136.932		100	98.9011	103.846	106.965	111.712	112.048	119.54			5.6158	100.835	0.984838	5	107.884	1.51246	8	116.698	1.52936	8	130.385	4.04415	4	148.589	5.01935
	5.68288	104.461	107.317	112.195	114.676	123.322	136.86	152.632	161.356		102.852	102.434	114.694	117.572	119.022	130.741	141.176		98.5185	106.387	108.947	117.064	121.352	136.932		98.9848	101.648	106.044	106.965	111.712	113.655	118.391			5.68288	101.293	1.13176	5	108.123	1.35042	8	117.297	1.38344	8	130.731	4.36173	4	151.721	5.84304
	5.74918	105.204	106.272	110.453	115.358	122.615	134.812	151.974	156.271		100	100.562	114.082	118.659	119.022	131.296	138.503		97.963	108.029	108.246	116.147	120.107	136.174		99.4924	101.099	104.945	106.468	110.811	111.647	122.222			5.74918	100.752	1.22221	5	107.382	1.40155	8	116.796	1.45205	8	131.126	3.14086	4	148.916	5.35234
	7.68617	269.517	258.188	252.613	242.321	236.042	234.471	218.75	158.305		123.004	99.2509	83.0612	112.319	129.167	105.37	96.7914		154.259	164.599	161.053	173.578	175.445	200.568		125.888	124.725	126.923	125.373	123.423	120.08	127.203			7.68617	159.479	28.1088	5	158.883	23.197	8	164.047	18.4229	8	166.903	30.3605	4	157.949	35.2069
	7.73948	273.606	263.415	253.31	238.225	239.929	242.321	214.474	173.559		96.3878	104.307	91.8367	113.406	124.094	110	132.442		157.037	167.883	164.211	173.761	177.402	202.841		127.919	126.374	125.824	125.373	122.523	124.096	127.969			7.73948	156.265	30.864	5	162.02	22.9765	8	164.18	18.4266	8	170.783	31.1889	4	173.492	23.6805
	7.7928	269.517	260.976	253.31	236.519	237.102	238.908	216.776	181.695		101.901	104.682	95.9184	115.942	125	114.444	137.79		160.185	172.445	166.316	181.468	183.096	204.167		124.873	125.275	125.275	123.383	122.973	121.285	129.119			7.7928	156.35	29.7847	5	162.788	22.6576	8	165.423	18.2223	8	171.659	29.8082	4	178.754	22.8488
	7.84608	266.543	260.279	254.355	241.297	237.456	233.447	214.803	181.017		99.2395	106.554	100.204	116.304	126.268	116.296	143.494		167.778	176.825	169.123	187.89	187.189	207.576		126.396	126.374	126.923	122.886	124.324	121.687	127.969			7.84608	157.266	29.4332	5	164.644	22.3831	8	167.802	18.6253	8	171.322	28.9844	4	179.771	20.5945
	7.8994	264.312	262.369	249.129	234.471	241.696	237.884	212.5	184.407		102.091	105.056	103.878	116.486	123.913	119.259	147.415		170.37	178.65	172.632	188.44	187.367	214.583		125.381	124.725	124.725	123.881	122.523	123.293	125.67			7.8994	157.376	28.9399	5	165.04	22.138	8	167.274	18.5657	8	174.349	30.3589	4	181.441	18.8468
	7.9527	268.401	259.93	258.188	238.225	237.102	234.13	210.526	180.339		102.662	107.865	105.102	115.942	111.051	121.667	149.911		169.63	181.022	177.193	191.56	189.68	213.447		126.396	125.275	123.077	121.393	123.874	120.482	126.82			7.9527	158.473	29.5421	5	166.721	22.5945	8	165.989	19.2992	8	174.016	29.0637	4	180.259	17.4982
	8.006	270.26	258.537	256.794	235.836	239.223	235.154	217.763	183.39		105.133	108.989	106.327	118.659	99.0942	119.815	152.763		172.963	184.672	178.246	194.128	193.06	215.72		124.365	123.626	124.176	123.881	121.622	120.884	126.82			8.006	159.27	29.9382	5	167.702	22.207	8	165.313	20.036	8	174.377	29.7794	4	184.639	18.7744
	8.05905	264.684	257.491	251.22	237.543	235.336	232.423	217.434	188.814		104.943	110.112	107.347	118.297	98.7319	120.926	153.119		174.815	187.591	180	195.78	194.128	216.477		125.381	125.275	125.275	122.886	122.523	119.679	126.82			8.05905	159.019	28.8176	5	167.74	21.6927	8	165.252	20.016	8	174.162	29.2408	4	186.456	18.6035
	8.11235	265.799	258.537	251.916	236.177	239.576	231.741	225.658	181.017		106.844	110.3	111.02	119.384	97.4638	119.259	156.506		175	187.409	177.368	198.165	193.772	216.856		122.843	122.527	121.429	122.388	123.874	121.687	124.904			8.11235	158.603	29.1712	5	167.546	21.7646	8	166.262	20.1566	8	173.19	29.6858	4	187.727	20.2424
	8.1654	264.684	259.582	249.826	231.399	234.276	232.082	217.763	184.068		108.555	110.487	112.857	118.841	99.0942	120.185	159.002		177.222	189.051	179.123	196.147	196.441	219.129		126.904	123.626	121.429	123.383	123.874	121.687	125.67			8.1654	160.198	28.5658	5	168.217	21.6124	8	165.22	19.4606	8	174.267	29.7792	4	186.944	17.0238
	8.21843	262.825	258.188	245.645	234.471	230.035	229.693	218.092	177.966		109.696	111.985	112.449	117.572	99.8188	119.074	159.893		178.519	189.964	182.281	199.45	200	221.023		127.919	124.176	125.275	125.871	123.874	121.687	128.736			8.21843	160.627	28.0688	5	168.957	20.987	8	165.863	19.6064	8	174.631	29.4066	4	185.317	17.198
RAW DATA
		0	0.8	0.8	1.25	1.25	2.5	5	5		0	0.8	0.8	1.25	1.25	2.5	5		0	0.8	0.8	1.25	1.25	2.5		0	0	0.8	0.8	1.25	1.25	2.5
		244	255	260	254	258	259	265	274		562	561	531	567	542	551	537		547	574	579	566	563	570		165	162	159	159	171	165	158
		248	256	259	255	262	263	277	275		571	547	531	556	537	545	542		547	562	563	571	559	574		160	162	160	153	162	160	151
		247	257	264	256	263	250	272	276		545	543	525	554	534	539	544		550	557	562	560	558	564		156	161	159	150	163	155	150
		246	260	260	263	258	249	260	269		548	534	522	550	531	530	537		539	548	551	547	545	554		155	157	159	150	160	157	153
		247	258	262	262	258	251	265	269		539	538	518	551	534	530	534		535	547	540	552	537	546		161	154	155	147	163	159	152
		237	253	261	257	256	250	262	272		535	528	515	549	531	532	533		533	544	539	542	540	538		159	154	153	150	158	161	149
		244	256	260	260	257	249	259	269		533	528	508	543	521	511	523		526	544	542	533	532	533		162	153	149	147	158	155	150
		243	255	260	255	264	249	258	266		530	522	513	533	518	517	521		525	540	538	535	523	535		161	154	147	152	155	152	139
		246	250	257	256	254	253	262	265		530	509	512	530	514	515	520		521	537	531	537	528	534		162	151	144	150	151	147	142
		237	252	252	259	254	251	265	267		520	514	499	534	515	507	521		513	526	543	531	520	519		163	152	147	148	150	149	145
		239	249	252	253	256	245	255	264		516	517	498	530	510	507	513		519	533	533	529	521	530		156	152	145	145	145	146	142
		236	248	251	252	255	249	261	262		516	502	488	524	517	499	510		513	526	527	526	523	527		158	149	142	147	149	145	136
		237	250	248	249	252	245	256	262		512	505	500	531	514	511	513		516	525	534	521	517	521		158	148	145	147	146	149	133
		240	248	254	251	253	243	257	259		506	506	487	532	515	509	507		511	528	525	522	520	521		156	149	134	146	145	145	138
		230	248	251	245	254	240	257	258		506	508	484	525	513	505	517		516	521	516	520	518	523		156	145	138	146	148	145	137
		233	242	246	247	248	234	256	253		501	503	488	528	510	504	508		507	515	516	521	515	517		154	148	135	145	144	145	136
		234	245	246	249	248	237	256	256		506	511	490	530	509	497	501		514	517	506	526	523	515		155	146	135	143	147	144	137
		230	237	244	241	244	240	261	255		502	504	486	518	498	493	505		507	528	525	516	519	510		155	150	136	141	147	144	135
		234	240	241	241	245	235	258	253		509	499	486	530	505	492	505		508	522	505	512	520	506		156	147	134	139	148	142	135
		232	238	243	240	237	233	259	252		508	492	485	520	507	496	504		502	517	513	506	512	513		151	146	133	141	143	144	134
		230	237	238	238	238	236	253	249		499	499	483	520	503	496	503		503	510	506	509	505	515		153	144	135	139	144	142	133
		227	232	240	236	242	237	252	253		498	506	482	523	502	505	505		495	513	505	513	522	519		154	142	136	138	145	143	135
		223	236	238	236	241	232	251	253		494	488	482	521	497	492	503		501	511	503	506	504	506		154	143	135	138	143	141	135
		231	232	241	232	236	238	252	248		496	501	478	521	499	496	507		501	508	508	500	508	509		151	145	135	142	145	140	136
		226	234	237	235	238	235	252	245		501	497	471	514	502	484	504		498	505	501	498	510	513		152	142	134	139	139	137	137
		227	235	242	237	236	236	250	244		501	502	480	506	500	494	502		493	508	500	500	508	509		153	140	134	138	141	140	136
		230	232	235	231	237	230	255	243		495	490	479	514	504	496	499		499	498	504	493	506	495		153	142	135	139	140	136	135
		228	234	233	237	234	233	250	244		496	501	482	516	500	487	496		500	507	497	501	500	501		153	142	136	139	143	137	136
		228	234	236	239	230	229	246	240		498	496	474	514	496	489	500		488	506	501	497	497	501		152	142	133	138	139	137	134
		225	233	238	234	232	228	248	244		500	489	477	520	500	486	501		500	506	502	497	511	502		149	141	130	138	139	135	136
		224	232	234	228	234	233	250	244		496	493	479	514	501	489	503		501	507	492	495	505	496		149	138	134	135	137	134	138
		226	231	236	232	234	229	250	243		505	495	476	520	495	488	500		491	507	507	496	503	505		153	141	134	137	137	136	139
		224	231	236	234	236	229	247	242		499	488	481	522	503	489	492		494	503	499	492	507	511		152	142	132	136	135	135	136
		224	233	234	231	237	230	245	239		496	489	472	511	496	489	499		495	503	506	494	507	505		151	142	134	139	137	135	137
		225	232	231	228	235	228	247	236		495	485	474	515	496	485	502		488	509	498	498	496	497		149	140	133	139	136	135	134
		224	232	234	229	235	233	245	241		500	496	483	511	498	484	487		491	499	496	494	502	505		149	142	135	137	138	138	136
		224	233	233	233	233	235	247	240		494	489	469	509	498	484	492		492	502	501	492	509	495		152	141	135	137	135	136	133
		221	228	231	227	232	228	244	240		492	494	470	503	487	483	498		490	499	503	495	495	503		153	139	132	137	139	136	137
		219	227	230	230	235	231	243	237		489	493	471	515	492	484	493		487	501	504	504	501	499		149	141	131	138	138	137	131
		222	228	233	225	233	231	244	238		492	486	473	511	496	482	493		496	499	501	487	490	493		150	136	135	136	133	136	140
		220	230	233	226	233	231	240	239		492	493	469	512	490	483	489		487	501	495	489	489	503		149	141	131	136	135	134	133
		226	227	230	226	228	229	243	233		495	490	477	502	495	478	495		493	498	499	494	497	494		148	140	131	139	136	133	133
		220	232	229	228	232	228	247	237		495	488	465	514	495	478	482		493	502	497	487	493	500		153	140	134	137	138	136	135
		224	227	229	227	228	226	241	229		491	488	472	519	493	480	486		480	500	493	493	491	491		150	141	131	136	136	135	137
		222	231	234	226	227	224	243	234		498	487	471	514	487	476	484		493	499	494	490	491	494		149	141	134	135	134	134	134
		217	230	230	227	237	226	243	233		487	495	471	513	488	476	489		482	500	501	488	489	491		148	140	132	133	134	133	134
		222	228	231	225	231	227	240	232		490	491	471	512	484	480	490		478	493	493	494	501	488		149	141	136	136	133	137	134
		220	230	233	228	227	225	242	233		489	482	476	511	488	477	489		492	497	503	487	490	495		151	138	131	134	140	134	134
		221	227	228	226	228	224	239	231		489	483	466	504	494	477	484		482	492	487	489	489	493		149	137	135	136	139	135	134
		229	241	241	237	240	244	246	244		628	662	627	675	651	654	635		650	672	683	658	631	605		173	157	149	154	154	148	151
		227	241	249	239	245	245	250	240		609	658	633	664	651	642	628		646	665	670	650	638	611		174	156	148	152	154	151	151
		232	238	238	240	247	241	252	243		613	646	611	657	646	634	621		638	672	682	664	635	608		173	153	149	152	153	152	153
		231	234	239	241	244	243	252	239		619	647	628	665	638	635	623		639	661	666	647	624	614		175	157	151	150	153	150	149
		226	239	244	242	239	242	248	240		618	637	616	662	649	639	627		645	658	671	656	626	612		171	155	149	154	150	144	148
		234	235	241	243	237	240	242	240		626	648	620	651	636	636	620		628	659	665	662	632	602		169	153	152	150	151	147	148
		226	240	242	240	236	240	246	239		614	633	619	659	646	636	626		638	658	663	654	622	616		173	151	148	149	153	148	147
		231	239	245	237	239	239	251	243		623	636	619	654	642	638	621		631	657	667	647	633	612		174	155	151	148	152	144	147
		234	237	240	235	239	238	244	243		624	636	612	660	638	636	623		639	653	660	641	622	600		166	154	151	150	151	146	146
		229	236	238	234	241	238	249	235		615	644	611	658	633	624	622		627	661	661	643	614	619		170	152	147	147	151	149	144
		225	234	245	239	238	240	251	243		625	636	615	652	632	623	619		626	660	660	638	611	606		168	156	150	149	152	145	146
		224	236	242	236	235	239	247	241		622	638	596	661	628	630	610		626	649	644	638	621	603		169	152	148	148	148	146	146
		226	241	242	238	238	237	251	243		628	636	605	646	643	625	620		617	655	666	641	617	614		168	149	150	146	150	145	145
		227	241	243	234	237	238	247	240		617	639	605	659	647	635	612		629	651	652	643	628	604		166	150	149	149	149	143	140
		225	239	236	240	238	238	252	245		628	645	604	649	630	631	610		626	652	651	640	617	605		167	154	147	151	149	145	147
		226	237	244	238	239	238	246	236		611	644	609	649	631	624	625		619	644	655	640	626	605		167	153	149	145	149	143	143
		226	239	240	236	232	239	248	247		610	645	609	657	641	624	613		640	655	659	638	615	610		166	151	146	146	150	143	146
		230	242	237	238	235	234	245	235		620	632	612	647	630	622	617		622	646	656	641	636	604		168	153	143	146	145	142	146
		231	235	241	236	235	233	246	237		615	635	601	658	631	628	627		632	645	663	639	626	606		164	152	143	146	152	144	146
		225	235	239	238	232	239	244	244		632	640	605	667	629	628	620		635	644	656	636	627	612		167	152	150	147	149	146	144
		269	287	287	293	283	293	304	295		526	534	490	552	552	540	561		540	548	570	545	562	528		197	182	182	201	222	249	261
		275	289	282	288	285	291	312	296		538	538	504	553	551	536	552		535	556	570	540	560	528		195	184	185	202	223	248	263
		273	286	286	293	290	291	312	296		529	539	494	551	553	537	544		539	554	565	532	566	526		200	184	186	200	222	244	258
		271	287	286	288	286	294	310	301		531	545	500	560	553	535	541		529	556	570	538	563	525		201	183	191	201	227	247	266
		268	285	283	291	286	298	307	296		537	551	507	555	552	540	543		531	552	565	536	558	529		200	185	189	200	222	245	265
		269	285	288	288	290	297	308	300		529	535	502	552	554	538	543		535	553	570	540	557	534		199	184	191	200	225	242	270
		275	285	290	289	283	292	311	304		540	548	498	556	552	533	544		531	560	561	537	560	531		202	183	188	204	226	244	273
		270	281	289	288	286	296	314	302		535	529	507	564	552	535	545		527	554	564	543	562	536		198	183	184	202	223	245	262
		270	288	291	290	288	295	314	309		535	536	503	560	557	535	542		541	553	563	534	555	534		195	183	188	201	229	245	273
		274	284	288	290	291	291	309	308		527	538	509	559	550	540	535		528	544	569	549	562	542		198	182	183	200	225	249	276
		266	281	289	289	291	299	320	315		528	531	502	555	558	538	551		538	561	565	535	551	539		198	183	187	200	228	246	269
		266	288	289	294	288	300	316	315		525	532	497	556	561	536	547		537	557	568	539	552	539		198	189	184	203	222	245	273
		265	282	297	286	288	299	321	319		527	530	503	550	557	544	540		523	558	569	544	559	544		200	182	182	202	225	247	270
		264	279	288	289	292	300	321	322		528	531	499	561	554	548	537		528	561	569	534	557	542		194	183	185	203	229	248	275
		269	283	284	291	293	309	321	323		534	531	504	557	560	538	565		529	547	569	547	563	551		197	183	186	197	224	249	272
		267	289	286	290	288	302	324	321		525	536	503	566	560	550	551		535	553	571	544	565	555		198	179	185	204	228	249	278
		270	285	292	293	290	302	322	328		531	537	502	554	558	545	559		524	550	569	546	568	550		196	182	187	205	228	249	274
		272	290	296	289	294	305	322	333		527	539	499	565	559	545	553		531	557	564	553	561	553		198	180	186	203	232	251	276
		270	290	291	291	294	306	323	330		531	533	506	572	562	559	560		526	553	569	543	561	551		193	181	185	201	227	247	275
		273	283	301	294	292	311	332	332		531	533	505	560	568	562	572		529	571	571	542	564	561		200	185	188	203	226	246	284
		274	286	287	289	293	304	331	335		526	538	509	563	560	557	564		535	558	574	547	567	559		196	183	183	204	228	254	284
		274	286	296	292	297	308	330	330		533	539	516	564	563	560	575		533	557	563	547	565	561		195	182	184	204	230	250	276
		271	289	293	290	295	315	334	338		527	531	510	558	557	562	573		539	564	574	554	571	568		197	180	184	204	229	250	279
		271	284	296	294	292	311	336	338		530	534	510	569	564	563	571		535	561	571	553	564	561		198	181	187	201	228	250	277
		269	289	290	294	297	307	337	342		524	536	517	575	571	575	582		534	560	575	561	577	571		194	179	189	202	228	250	281
		268	291	289	298	297	309	340	338		536	534	511	571	572	570	576		539	562	574	552	571	568		200	181	188	207	232	251	278
		267	294	290	295	305	316	344	345		529	534	516	581	566	571	581		533	552	571	555	567	577		195	182	184	204	233	259	283
		272	284	296	293	302	319	344	348		534	540	523	570	575	568	590		537	565	580	552	564	578		196	182	191	207	229	254	281
		267	290	294	295	301	314	347	353		526	534	514	570	575	572	582		532	558	579	555	572	572		195	178	192	206	231	258	285
		271	286	296	294	298	319	353	354		535	535	519	573	567	568	587		537	560	578	561	576	567		194	185	187	204	230	257	286
		266	287	292	294	302	318	347	348		532	538	521	580	568	581	590		527	562	576	565	575	572		194	185	188	204	228	258	284
		270	287	295	297	304	321	351	352		528	544	513	573	571	575	600		536	565	582	558	574	579		197	179	185	202	234	252	286
		275	288	298	300	311	322	352	359		530	537	514	572	574	581	596		532	561	580	555	590	578		195	182	192	208	234	254	287
		268	284	298	297	303	323	360	351		529	537	522	584	570	577	606		535	564	581	565	584	582		198	183	189	201	236	254	283
		272	290	299	300	306	320	355	363		533	529	518	580	577	580	593		531	557	578	563	593	584		193	183	188	204	233	261	286
		273	290	297	299	306	325	366	360		534	529	522	585	576	585	605		527	557	585	565	583	584		195	182	191	200	234	258	290
		274	287	301	300	306	322	358	367		530	537	521	583	581	575	600		535	560	581	567	583	590		196	182	187	206	234	263	289
		278	287	301	304	303	329	360	368		536	539	523	586	573	582	607		530	564	576	566	580	590		194	177	189	207	233	254	287
		272	292	296	302	306	332	359	370		536	536	525	579	575	591	607		536	561	586	562	589	598		200	181	185	204	232	262	289
		273	292	303	301	310	329	363	368		533	534	523	592	571	585	610		533	568	577	563	586	599		195	181	189	206	235	261	292
		271	290	299	307	315	327	367	370		532	543	521	590	567	591	620		526	559	582	564	589	595		191	181	185	201	234	258	290
		271	287	300	305	310	334	370	365		530	533	528	588	575	587	613		535	567	591	562	596	594		197	180	186	207	238	259	294
		275	293	301	305	314	338	372	373		530	536	530	583	578	596	624		525	559	582	563	592	598		201	181	188	206	237	259	290
		271	287	297	300	305	332	365	375		531	538	521	583	582	588	624		530	559	588	576	600	608		199	183	187	206	239	266	297
		271	292	298	308	313	337	372	376		525	535	523	583	586	596	622		529	559	591	571	594	606		197	182	183	205	238	261	293
		279	291	298	307	312	338	382	384		532	538	520	592	588	600	635		530	565	583	570	597	605		198	180	191	211	237	262	289
		272	291	303	306	319	339	374	380		523	539	525	585	580	589	635		535	565	586	567	585	613		202	184	187	205	237	264	297
		273	291	304	310	315	335	383	376		522	538	530	590	581	608	638		537	565	583	572	598	617		194	180	187	209	238	265	292
		274	286	297	304	311	340	380	379		531	540	527	588	580	607	635		537	560	588	572	599	600		196	183	189	208	237	267	293
		276	289	301	300	314	337	384	381		527	534	531	596	592	605	628		530	575	586	586	598	613		195	184	191	211	245	263	292
		273	296	303	309	316	347	384	386		525	532	531	593	579	608	643		528	567	589	571	604	611		198	184	190	204	234	262	292
		272	296	306	304	317	343	381	383		527	532	530	597	594	610	634		525	566	583	579	597	623		197	181	190	207	239	268	297
		271	290	300	316	314	342	383	387		526	534	533	586	584	605	637		529	559	583	574	601	617		199	181	193	210	240	266	293
		275	293	297	309	315	346	391	384		530	531	522	593	592	611	645		530	570	600	576	611	619		201	182	185	206	238	263	296
		273	293	302	307	324	340	382	385		529	534	530	603	595	612	651		523	564	589	585	602	625		200	182	188	208	238	268	295
		276	292	304	312	317	352	395	389		536	536	529	595	601	618	639		525	569	592	585	604	626		195	183	189	208	241	271	307
		274	292	302	311	316	348	397	387		524	534	520	593	596	611	648		532	571	601	584	600	624		193	184	190	207	235	264	299
		274	295	300	317	324	348	390	386		539	541	535	599	597	613	657		539	564	592	590	602	627		196	181	187	207	240	268	299
		274	288	305	311	320	351	396	384		526	536	532	597	601	613	645		527	561	594	581	612	622		191	179	186	210	243	266	303
		274	295	306	314	318	357	395	382		536	533	534	602	587	626	656		524	564	593	590	603	636		199	183	186	212	240	264	298
		278	292	302	316	328	359	403	388		533	534	530	602	607	624	661		531	577	582	581	606	629		197	186	192	208	241	270	309
		280	293	310	315	319	359	396	398		525	532	531	610	595	618	664		529	572	593	586	600	635		198	182	187	212	239	270	303
		275	297	299	313	325	354	404	388		524	552	528	597	598	616	662		530	567	592	584	618	646		193	183	185	208	240	267	299
		272	295	307	314	326	354	403	391		540	533	527	602	601	629	673		530	566	598	586	613	633		194	178	192	210	240	268	302
		275	294	304	318	324	359	402	393		530	542	537	606	601	632	671		528	574	597	589	612	632		196	183	190	209	234	272	301
		268	296	306	313	323	367	411	388		520	537	533	602	598	633	665		529	564	593	588	613	643		196	184	189	208	240	271	301
		277	301	301	315	329	359	418	396		522	540	525	604	605	640	669		521	575	594	586	609	646		194	177	188	211	239	271	302
		274	293	307	322	323	359	407	392		533	537	536	610	603	637	679		532	560	593	594	615	652		199	185	189	216	239	272	306
		272	291	301	317	329	355	412	395		541	545	528	605	601	641	673		523	569	593	589	620	650		195	182	187	210	240	270	308
		274	298	303	315	327	360	409	399		526	533	541	618	613	636	684		525	566	595	592	623	643		201	179	186	210	238	273	305
		276	296	309	317	320	358	414	398		531	540	532	620	611	633	691		529	582	600	586	626	640		194	183	192	212	242	273	299
		270	296	306	324	323	364	420	403		521	530	539	609	613	645	679		526	569	595	597	613	657		199	180	188	209	243	272	303
		276	302	308	315	332	358	421	411		528	531	536	611	613	645	685		537	568	599	597	631	650		197	182	189	209	246	277	307
		277	295	312	320	328	370	424	412		529	553	532	606	610	650	680		532	566	604	593	621	654		203	184	190	213	239	271	298
		276	294	308	321	328	359	422	406		531	533	546	609	610	654	701		534	566	594	597	624	657		196	180	193	209	243	269	305
		274	300	313	318	334	366	422	404		530	533	539	610	613	647	698		527	568	600	604	626	658		196	184	190	211	246	273	310
		270	298	312	318	335	367	423	413		529	543	549	627	616	644	694		530	573	602	594	625	666		194	181	188	210	245	277	306
		276	300	309	324	333	377	428	421		529	550	543	622	612	657	702		521	571	595	593	632	663		197	182	189	210	244	275	306
		275	297	312	326	330	366	430	418		522	539	539	610	623	643	700		516	564	611	595	626	671		193	185	190	208	239	271	312
		273	302	316	320	327	378	425	416		537	541	541	617	616	659	710		532	578	601	590	620	670		198	188	190	209	246	275	307
		271	299	307	328	330	371	426	417		538	534	539	623	623	659	692		527	572	592	613	624	676		201	186	194	209	244	272	303
		278	296	312	316	329	371	433	431		533	541	542	619	628	662	709		530	569	596	602	638	663		197	182	189	214	245	272	310
		276	297	315	324	330	371	436	419		529	537	552	638	636	665	713		531	579	594	607	633	673		195	186	192	208	242	270	311
		276	300	315	322	326	373	431	414		534	544	549	630	619	657	699		520	585	604	617	631	675		194	182	187	217	241	273	305
		268	296	311	327	336	371	435	428		526	538	544	619	620	673	706		529	570	610	605	639	673		196	183	193	209	237	277	309
		276	296	315	322	341	383	441	432		527	550	541	617	625	669	718		534	575	605	608	630	678		193	188	188	216	247	273	312
		277	300	315	325	334	377	439	432		527	546	541	633	630	674	736		525	572	607	610	642	684		195	184	191	214	247	271	306
		274	304	314	327	339	374	429	438		529	538	542	629	638	665	727		537	580	610	605	643	683		194	190	191	214	244	276	312
		272	298	313	328	337	385	431	430		524	540	549	625	641	676	727		527	578	614	605	643	677		199	180	187	214	243	276	312
		275	293	312	330	336	382	437	426		535	543	547	635	639	683	748		537	585	608	613	652	688		200	183	194	216	246	271	305
		276	302	318	330	341	384	440	426		529	543	548	640	641	678	735		519	578	608	617	643	695		197	187	189	209	245	279	310
		274	301	319	326	334	383	449	440		533	543	548	639	632	681	741		524	577	606	619	648	705		197	186	194	216	246	273	305
		278	299	317	325	346	381	442	434		528	541	554	632	642	679	737		529	584	617	619	650	705		193	182	192	214	248	282	308
		274	302	322	334	340	385	439	435		533	541	556	640	650	679	736		530	583	622	630	658	706		196	187	191	210	248	276	310
		280	301	324	335	337	388	448	435		539	541	553	635	640	692	749		534	586	619	626	664	708		196	184	192	213	246	272	309
		274	304	317	334	341	394	453	460		535	550	556	643	639	698	745		535	582	614	626	651	708		198	184	190	209	251	274	316
		279	305	316	333	342	391	453	451		538	540	552	637	662	700	748		525	582	611	619	658	709		200	184	191	210	245	279	314
		277	302	316	330	342	390	451	432		534	544	550	637	654	691	752		529	589	626	628	658	701		195	182	189	213	252	276	310
		281	308	319	327	342	397	453	462		535	544	566	640	653	695	764		533	588	623	635	658	712		195	185	189	216	245	278	314
		279	307	314	331	343	393	460	445		529	546	552	649	654	700	757		534	585	626	634	664	711		193	182	194	210	246	280	310
		282	305	317	332	343	397	462	442		533	537	560	658	653	693	775		526	586	622	633	665	719		200	183	192	210	246	283	317
		278	307	323	342	349	394	472	445		528	538	555	648	664	706	773		535	578	627	629	664	720		197	180	195	213	250	280	313
		278	307	321	332	352	399	460	459		542	541	561	652	654	696	779		534	587	630	632	672	723		197	180	189	215	248	279	312
		281	308	322	336	349	401	464	476		541	547	562	649	657	706	792		532	583	621	638	682	723		195	185	193	215	248	283	309
		283	305	317	338	347	395	462	461		526	537	559	655	657	709	777		529	592	617	633	675	719		196	184	191	214	246	278	319
		725	741	725	710	668	687	665	467		647	530	407	620	713	569	543		833	902	918	946	986	1059		248	227	231	252	274	299	332
		736	756	727	698	679	710	652	512		507	557	450	626	685	594	743		848	920	936	947	997	1071		252	230	229	252	272	309	334
		725	749	727	693	671	700	659	536		536	559	470	640	690	618	773		865	945	948	989	1029	1078		246	228	228	248	273	302	337
		717	747	730	707	672	684	653	534		522	569	491	642	697	628	805		906	969	964	1024	1052	1096		249	230	231	247	276	303	334
		711	753	715	687	684	697	646	544		537	561	509	643	684	644	827		920	979	984	1027	1053	1133		247	227	227	249	272	307	328
		722	746	741	698	671	686	640	532		540	576	515	640	613	657	841		916	992	1010	1044	1066	1127		249	228	224	244	275	300	331
		727	742	737	691	677	689	662	541		553	582	521	655	547	647	857		934	1012	1016	1058	1085	1139		245	225	226	249	270	301	331
		712	739	721	696	666	681	661	557		552	588	526	653	545	653	859		944	1028	1026	1067	1091	1143		247	228	228	247	272	298	331
		715	742	723	692	678	679	686	534		562	589	544	659	538	644	878		945	1027	1011	1080	1089	1145		242	223	221	246	275	303	326
		712	745	717	678	663	680	662	543		571	590	553	656	547	649	892		957	1036	1021	1069	1104	1157		250	225	221	248	275	303	328
		707	741	705	687	651	673	663	525		577	598	551	649	551	643	897		964	1041	1039	1087	1124	1167		252	226	228	253	275	303	336
[truncated: 1 more columns]

## Sheet: Fig4D
Elen
lipid to protein ratio 50
Mn transport
in presence of Ca
NORMALIZED DATA																																					Concentrations
		Concentrations Mn/Ca (uM/mM)																																			Mean	SEM	N
	Time norm	0	50/0	50/0	50/0.5	50/0.5	50/2	50/2		0	50/0	50/0.5	50/0.5	50/2	50/2	50/2		0	50/0	50/0.5	50/0.5	50/2	50/2	50/2		0	50/0	50/0.5	50/0.5	50/0.5	50/2	50/2	50/2			Time norm	0 μM Mn2+ / 0 mM Ca2+			50 μM Mn2+ / 0 mM Ca2+			50 μM Mn2+ / 0.5 mM Ca2+			50 μM Mn2+ / 2 mM Ca2+
	-7.48953	111.494	120.887	125.87	125.446	126.832	125.842	127.519		113.566	133.283	125.104	120.514	123.395	122.63	125.327		138.424	186.444	164.353	173.14	178.759	172.977	180.307		123.731	150.111	152.418	150.883	148.007	151.251	156.183	148.561			-7.48953	121.804	6.15154	4	143.319	11.8622	5	142.966	6.3854	9	146.614	6.97007	11
	-7.41842	110.713	120.8	122.637	124.193	126.316	126.354	129.434		109.781	124.907	123.642	118.333	122.473	122.115	123.763		136.961	184.878	163.565	173.896	174.939	173.986	179.892		122.778	147.416	152.484	151.305	146.478	149.94	153.953	147.302			-7.41842	120.058	6.36425	4	140.128	12.1795	5	142.246	6.62344	9	145.832	6.82803	11
	-7.34768	109.499	119.534	122.44	123.557	122.314	123.376	124.108		109.342	122.226	121.811	119.025	120.609	120.387	123.499		136.458	183.076	161.126	172.264	177.486	173.219	179.04		122.516	151.191	149.185	146.6	145.778	147.597	157.36	148.394			-7.34768	119.454	6.45411	4	139.693	12.2952	5	140.184	6.45737	9	145.007	7.22905	11
	-7.2767	108.458	118.964	120.784	122.256	122.373	123.092	122.427		104.671	121.523	121.036	116.777	120.399	119.619	122.887		136.9	180.502	162.101	168.942	176.617	172.25	178.625		117.094	147.455	147.211	142.04	145.204	148.974	156.005	144.925			-7.2767	116.781	7.19255	4	137.846	11.8868	5	138.66	6.36572	9	144.166	7.21737	11
	-7.20572	107.859	117.67	119.73	119.539	121.46	120.218	122.32		105.541	122.035	118.295	115.981	118.469	117.444	120.937		132.815	180.073	160.844	170.374	174.293	171.039	175.841		120.214	145.645	149.212	140.564	142.988	145.187	153.83	142.652			-7.20572	116.607	6.28951	4	137.03	11.8867	5	137.695	6.68098	9	142.021	7.16305	11
	-7.13475	106.645	115.032	118.074	118.325	119.086	118.189	121.323		103.835	120.006	116.707	116.464	117.071	115.491	119.448		132.891	178.443	159.925	166.813	172.918	170.252	176.88		118.141	144.721	146.734	140.894	143.039	146.789	147.073	143.461			-7.13475	115.378	6.60724	4	135.255	12.0238	5	136.443	6.52036	9	140.809	7.28211	11
	-7.06402	106.098	115.245	117.473	117.401	118.342	117.857	120.688		105.218	119.032	116.523	115.061	116.139	115.569	118.977		134.339	177.52	159.193	168.265	172.898	167.185	174.055		118.277	143.888	144.733	138.271	140.122	145.571	150.821	142.33			-7.06402	115.983	6.80573	4	134.632	11.9137	5	135.323	6.61314	9	140.19	7.13867	11
	-6.99303	104.545	113.477	116.369	116.398	116.465	116.671	119.173		101.325	117.033	116.155	114.188	115.15	115.686	116.81		135.056	177.113	157.861	166.673	170.938	166.135	173.577		115.88	142.143	143.593	138.574	137.384	143.89	147.36	141.2			-6.99303	114.202	7.61986	4	133.227	12.1284	5	134.144	6.55042	9	138.781	7.10089	11
	-6.92232	105.023	111.709	114.655	115.329	116.634	115.998	118.577		100.596	117.997	115.283	114.008	115.112	114.588	115.66		128.822	174.432	156.473	164.863	167.926	162.624	173.868		116.801	141.531	142.282	136.241	137.855	141.785	147.305	141.547			-6.92232	112.81	6.33853	4	132.065	11.832	5	133.219	6.39086	9	137.726	6.9632	11
	-6.85158	103.34	112.878	113.699	115.628	115.124	116.671	115.333		100.017	116.19	113.598	112.007	114.417	113.85	115.302		130.376	171.707	155.516	163.888	166.774	162.503	171.022		114.383	137.144	141.367	136.597	136.365	139.163	145.513	139.17			-6.85158	112.029	6.84333	4	130.323	11.2686	5	132.232	6.44257	9	136.338	6.85622	11
	-6.78058	102.186	111.342	113.561	113.884	115.511	114.538	116.202		101.855	116.21	114.354	112.187	113.305	113.539	115.161		130.3	172.372	154.597	162.157	166.795	161.493	170.42		113.786	136.779	140.586	135.701	137.014	142.288	142.886	137.577			-6.78058	112.032	6.69153	4	130.053	11.5107	5	131.777	6.27625	9	135.837	6.86129	11
	-6.70962	101.683	110.047	112.94	114.973	113.654	112.945	114.795		101.507	115.607	113.569	111.732	113.628	113.063	114.369		129.401	169.949	152.439	161.202	164.551	159.637	166.93		111.996	138.979	137.472	133.962	132.187	136.912	141.614	131.436			-6.70962	111.147	6.56011	4	129.504	11.3393	5	130.132	6.06666	9	133.626	6.60397	11
	-6.63863	100.685	109.555	112.092	113.161	114.33	112.565	114.18		100.439	115.256	113.211	109.958	113.381	112.277	114.209		129.096	167.675	147.43	160.008	163.965	158.85	167.138		111.263	137.573	133.218	135.754	130.404	136.568	142.722	131.475			-6.63863	110.371	6.7323	4	128.43	11.0012	5	128.608	5.82514	9	133.394	6.63294	11
	-6.56765	99.7311	109.564	112.329	111.793	113.327	111.418	113.447		96.4635	115.989	112.6	110.044	111.384	111.888	114.379		125.804	167.417	146.604	159.65	164.107	157.598	165.517		111.912	135.152	134.265	133.052	132.862	136.092	138.468	129.509			-6.56765	108.478	6.6636	4	128.09	10.8041	5	128.244	5.86095	9	132.164	6.59331	11
	-6.49692	99.7745	109.023	111.885	111.398	112.8	112.129	112.069		97.035	115.225	112.281	110.082	111.041	110.732	113.352		126.81	165.809	147.336	157.68	162.045	154.612	167.304		112.541	135.985	133.656	131.168	132.633	136.86	139.371	132.991			-6.49692	109.04	6.81906	4	127.586	10.6663	5	127.67	5.76399	9	132.046	6.58559	11
	-6.42593	98.6815	108.347	110.545	111.755	111.539	111.304	109.86		97.8632	115.346	112.097	109.588	110.328	109.78	113.483		124.783	166.581	145.159	157.103	162.328	154.107	167.844		111.85	133.095	135.365	130.522	128.429	134.476	135.746	129.252			-6.42593	108.294	6.36217	4	126.783	10.8583	5	126.84	5.67265	9	130.774	6.69409	11
	-6.35522	97.7793	107.806	110.89	110.791	110.973	109.986	111.912		95.8423	113.97	110.024	109.029	109.853	109.78	111.316		122.893	164.929	146.004	157.043	160.368	154.773	163.565		109.934	130.816	132.172	129.902	128.442	131.762	137.579	129.381			-6.35522	106.612	6.25904	4	125.682	10.5883	5	126.042	5.80167	9	130.025	6.47721	11
	-6.2845	97.2849	106.985	110.2	109.172	110.318	109.037	110.329		97.3497	112.403	109.792	108.906	109.32	108.974	111.052		122.862	164.543	145.253	155.352	160.085	154.612	163.232		108.479	131.181	131.072	127.912	128.238	132.994	135.513	130.049			-6.2845	106.494	6.05731	4	125.062	10.7334	5	125.113	5.70523	9	129.563	6.54188	11
	-6.21352	97.7273	107.352	109.362	109.731	109.841	108.516	108.58		96.1073	112.835	109.472	108.678	108.74	110.023	112.513		122.268	162.312	144.409	156.228	159.519	152.129	163.315		107.6	131.506	132.662	128.967	129.525	131.656	134.323	129.548			-6.21352	105.926	6.0103	4	124.674	10.3392	5	125.501	5.79149	9	128.988	6.43751	11
	-6.14253	97.3629	106.212	109.027	108.44	109.881	106.667	107.232		92.5211	112.323	108.591	107.853	109.054	108.615	110.836		120.043	162.741	144.128	154.059	156.589	152.916	160.656		106.972	131.506	130.515	129.006	123.882	128.095	133.694	129.869			-6.14253	104.225	6.06776	4	124.362	10.5677	5	124.039	5.67133	9	127.656	6.36394	11
	-6.07153	97.3976	106.685	108.85	109.278	108.491	108.431	108.551		94.484	112.413	109.666	108.242	108.245	108.489	110.76		122.939	160.789	143.79	153.064	156.306	150.757	161.363		104.993	130.204	129.681	126.199	124.481	130.346	133.242	128.327			-6.07153	104.953	6.39118	4	123.788	10.1373	5	123.655	5.50717	9	127.711	6.24768	11
	-6.00082	96.4434	106.28	107.736	109.288	109.017	106.999	107.026		94.3763	114.01	109.046	109	108.502	109.654	111.948		123	161.669	143.321	152.507	154.466	151.322	159.098		106.019	129.345	129.707	126.305	127.296	128.691	134.446	127.634			-6.00082	104.96	6.52617	4	123.808	10.3093	5	123.943	5.43165	9	127.253	6.1073	11
	-5.92983	96.7731	106.396	108.387	109.616	109.265	108.156	108.131		94.2935	112.403	108.755	107.663	109.016	107.44	110.289		119.235	159.674	141.632	151.811	154.547	150.151	156.44		105.925	127.21	127.216	128.506	124.455	129.392	131.915	127.634			-5.92983	104.057	5.64386	4	122.814	9.9098	5	123.213	5.31367	9	126.646	5.94436	11
	-5.8591	95.6541	104.985	107.372	108.72	109.424	108.734	106.938		94.9892	113.116	108.232	107.16	107.342	108.052	109.14		122.375	159.76	140.469	151.87	153.092	149.142	157.25		106.679	127.848	129.045	129.178	124.086	126.705	133.748	124.602			-5.8591	104.924	6.40464	4	122.616	10.1008	5	123.132	5.36397	9	125.886	5.973	11
	-5.78813	95.6714	105.912	107.431	108.296	107.845	107.956	106.42		94.7408	111.821	108.659	107.227	107.97	107.925	108.81		119.646	158.687	139.869	148.727	153.032	148.94	157.977		103.287	127.705	129.137	127.86	125.105	126.4	130.602	128.546			-5.78813	103.336	5.76379	4	122.311	9.88105	5	122.525	5.15112	9	125.871	6.00252	11
	-5.71713	95.9056	104.318	107.184	107.033	108.659	108.26	106.665		95.1217	111.299	108.62	107.521	106.838	107.333	109.375		119.311	156.928	140.769	148.388	151.415	149.243	155.463		104.752	128.655	126.872	128.795	123.042	127.671	132.257	128.88			-5.71713	103.773	5.62088	4	121.677	9.77349	5	122.189	5.15044	9	125.764	5.8655	11
	-5.64615	95.4545	104.792	107.204	106.638	107.895	106.486	105.404		93.5316	111.399	107.981	106.497	107.085	107.925	108.141		118.153	156.8	141.069	148.786	149.818	147.669	152.555		106.522	129.436	128.382	124.539	123.462	125.751	130.068	126.644			-5.64615	103.415	5.68552	4	121.926	9.73065	5	121.694	5.27238	9	124.323	5.67007	11
	-5.57543	94.9341	104.116	105.332	107.053	107.19	107.141	106.587		94.807	111.73	107.738	106.838	106.648	106.76	108.056		117.467	157.25	140.563	148.01	149.697	146.317	151.932		104.731	124.893	127.137	124.934	123.054	126.466	130.15	124.152			-5.57543	102.985	5.35778	4	120.664	9.86197	5	121.391	5.17731	9	123.991	5.57795	11
	-5.50445	95.4806	104.338	106.485	105.916	106.594	106.866	105.433		92.8027	112.333	107.322	107.35	106.182	106.566	107.378		116.339	155.749	138.293	146.836	149.596	146.498	151.766		104.616	125.739	125.573	125.936	122.851	128.916	130.233	126.953			-5.50445	102.31	5.31634	4	120.929	9.46926	5	120.741	5.03203	9	124.217	5.67252	11
	-5.43347	94.908	103.401	105.992	105.694	105.75	106.961	103.049		94.3763	111.56	106.46	105.51	106.02	107.207	107.434		117.223	153.754	138.255	145.145	148.06	144.945	151.87		103.496	126.195	127.19	125.712	123.933	123.951	128.057	126.426			-5.43347	102.501	5.33378	4	120.18	9.27506	5	120.405	5.08927	9	123.089	5.57305	11
	-5.36297	94.6999	103.14	104.78	105.367	106.395	105.936	106.274		91.9745	111.007	106.751	105.653	106.334	106.702	107.349		114.769	154.118	137.749	144.986	149.03	146.256	150.104		103.957	124.749	124.858	125.764	124.022	124.957	130.356	125.385			-5.36297	101.35	5.15584	4	119.559	9.44045	5	120.172	4.98983	9	123.517	5.53747	11
	-5.29197	94.7519	103.758	104.76	106.465	105.76	104.533	105.062		94.0285	110.997	108.484	106.639	104.841	106.303	107.142		115.607	153.904	137.692	144.031	146.281	145.247	148.027		103.119	124.463	123.864	125.527	120.889	126.599	129.343	124.486			-5.29197	101.877	5.02024	4	119.576	9.34238	5	119.928	4.76364	9	122.533	5.42644	11
	-5.221	94.11	103.082	103.449	105.617	104.965	104.362	103.762		95.3288	110.083	105.985	105.131	105.725	106.148	106.803		116.141	153.861	138.462	142.439	148.06	144.279	149.086		103.905	124.124	123.4	126.568	121.475	127.075	131.477	123.651			-5.221	102.371	5.08098	4	118.92	9.52953	5	119.338	4.92682	9	122.766	5.56919	11
	-5.15	94.162	103.381	104.918	104.018	105.998	104.827	104.016		93.4322	110.294	106.179	105.709	103.975	105.031	106.841		117.193	152.381	137.674	143.355	146.079	144.46	148.629		102.188	126.129	126.607	127.412	121.692	125.619	129.207	124.717			-5.15	101.744	5.51835	4	119.421	9.17136	5	119.849	5.00798	9	122.127	5.49923	11
	-5.07902	94.084	102.618	103.42	104.23	104.558	103.253	103.567		92.7447	109.973	106.46	105.947	105.136	105.74	106.784		114.982	152.038	136.998	143.076	146.564	143.613	148.65		101.916	124.971	122.95	124.446	120.558	122.719	130.575	126.233			-5.07902	100.932	5.10156	4	118.604	9.27082	5	118.802	4.8667	9	122.076	5.51376	11
	-5.00803	93.4074	102.096	103.696	104.278	103.982	102.93	104.7		93.2665	110.134	104.717	105.112	104.765	105.517	106.643		114.617	152.016	136.623	142.101	144.988	142.745	147.071		102.47	124.814	122.685	125.29	121.297	124.586	128.098	123.651			-5.00803	100.94	5.04164	4	118.551	9.27751	5	118.454	4.91472	9	121.427	5.30682	11
	-4.93705	93.4247	102.125	104.041	104.114	104.29	102.807	103.626		93.7883	110.395	104.581	104.78	105.031	104.944	105.465		114.693	150.837	135.704	142.32	144.786	142.624	147.32		100.429	124.137	124.566	121.758	120.571	126.572	129.207	124.293			-4.93705	100.584	4.97093	4	118.307	9.00041	5	118.076	4.86525	9	121.516	5.40995	11
	-4.86607	93.3119	102.464	103.38	103.719	104.32	101.546	103.538		92.9601	109.169	105.346	105.207	104.926	104.584	105.277		113.626	151.244	137.805	141.922	145.918	143.169	145.139		101.099	125.895	124.791	124.565	121.946	124.652	128.906	127.942			-4.86607	100.249	4.83837	4	118.43	9.21866	5	118.847	4.96895	9	121.418	5.45694	11
	-4.79535	93.3293	102.106	102.552	103.835	103.982	102.21	102.326		93.6227	108.687	104.939	104.884	103.291	104.623	105.946		111.949	150.386	134.934	140.788	145.19	143.108	145.949		99.9058	124.814	124.394	123.735	122.099	123.99	128.878	125.835			-4.79535	99.7018	4.35517	4	117.709	9.1456	5	118.177	4.76694	9	121.031	5.47808	11
	-4.72435	93.3987	101.729	102.198	102.168	102.701	102.153	103.782		93.8877	108.045	104.194	103.196	103.623	104.351	104.655		114.281	153.432	136.098	141.823	143.715	141.514	146.032		102.648	121.989	123.851	124.354	120.838	122.547	129.07	125.565			-4.72435	101.054	4.89444	4	117.479	9.70448	5	117.691	5.09809	9	120.637	5.34983	11
	-4.65337	93.1037	101.787	103.144	102.274	102.85	101.707	102.121		92.7613	108.175	104.155	103.936	103.776	103.516	104.325		113.839	149.936	135.347	139.574	143.593	140.888	146.78		99.4033	123.786	123.586	124.75	119.386	122.865	128.605	127.21			-4.65337	99.7769	4.92987	4	117.366	9.0317	5	117.317	4.86936	9	120.49	5.45786	11
	-4.58265	92.4618	101.121	101.646	102.043	102.741	101.233	103.274		91.345	108.476	104.455	103.699	102.977	104.303	104.777		112.559	150.622	134.597	140.489	143.533	141.191	145.638		101.382	124.124	125.017	123.287	119.908	122.971	129.152	126.824			-4.58265	99.4369	4.91685	4	117.198	9.33157	5	117.359	4.90723	9	120.534	5.39027	11
	-4.51167	92.8262	100.415	101.823	101.069	101.917	101.337	102.668		93.5481	108.938	104.416	103.832	102.53	103.409	104.523		111.081	150.922	132.777	140.768	143.533	142.018	146.178		100.021	124.32	124.964	121.903	118.023	123.17	126.347	128.379			-4.51167	99.3689	4.22569	4	117.284	9.41881	5	116.63	4.87929	9	120.372	5.48685	11
	-4.44068	92.5746	100.377	101.587	100.896	102.761	100.389	103.127		92.1898	108.065	103.351	103.054	102.748	103.555	104.089		113.214	148.756	135.629	140.111	142.866	141.372	146.365		102.135	121.286	122.923	123.405	119.513	122.799	128.618	124.563			-4.44068	100.029	4.96079	4	116.014	8.98802	5	116.849	5.00869	9	120.045	5.45072	11
	-4.3697	91.8026	99.8358	100.286	101.272	101.291	99.9526	103.049		92.0739	107.141	102.799	101.868	101.959	102.02	105.559		112.605	149.957	134.484	140.927	144.766	141.978	145.118		100.586	124.463	123.095	123.629	119.386	124.295	125.773	124.64			-4.3697	99.2669	4.89128	4	116.336	9.51537	5	116.528	5.12046	9	119.919	5.51613	11
	-4.29898	92.2363	98.7054	99.931	101.831	102.443	99.7914	102.531		91.9579	107.864	103.651	101.982	101.931	102.195	104.052		109.526	148.456	133.021	140.768	143.23	140.484	145.43		101.12	123.226	122.141	121.429	118.673	120.932	126.238	124.872			-4.29898	98.7101	4.18623	4	115.636	9.29633	5	116.215	4.87428	9	119.244	5.45608	11
	-4.22798	91.5684	99.9227	100.03	100.607	101.082	100.284	101.524		92.2064	107.954	103.613	102.693	101.522	103.681	103.609		113.093	148.134	133.34	140.609	142.724	141.554	143.664		101.131	122.432	123.175	120.032	120.978	122.719	126.607	123.972			-4.22798	99.4994	5.02927	4	115.694	9.08777	5	116.237	4.98366	9	119.26	5.40055	11
	-4.157	91.9674	99.7875	100.177	100.116	100.397	98.9663	102.424		91.4693	106.588	102.935	102.257	102.52	101.661	104.315		109.953	149.635	133.696	140.967	143.897	141.332	144.994		99.4033	122.666	119.968	122.377	118.889	124.308	128.263	127.454			-4.157	98.1982	4.31784	4	115.771	9.4268	5	115.734	5.07713	9	120.012	5.58602	11
	-4.08602	90.3019	98.6475	99.5959	99.9518	101.728	98.9	101.72		92.4963	107.522	103.622	102.798	101.931	102.768	103.42		111.873	149.828	133.358	138.321	142.563	140.969	143.311		100.953	123.174	122.075	121.468	116.864	120.257	126.785	126.914			-4.08602	98.906	4.89432	4	115.754	9.5854	5	115.576	4.79323	9	119.049	5.43878	11
	-4.01503	90.5708	99.1692	99.4481	100.347	100.834	98.7293	101.417		92.2561	107.563	102.431	101.204	101.274	102.185	103.901		111.706	148.563	133.583	139.455	143.856	141.655	143.581		100.733	125.504	128.554	124.75	126.557	126.056	130.547	127.12			-4.01503	98.8163	4.83761	4	116.049	9.43158	5	117.524	5.35162	9	120.029	5.65499	11
	-3.94405	90.6055	98.4736	98.098	99.0751	99.7716	97.6766	101.202		91.7509	107.442	102.508	101.982	101.265	101.467	102.902		109.084	149.785	134.353	140.191	142.057	140.383	145.908		103.36	123.617	125.798	127.504	126.06	126.321	129.179	126.246			-3.94405	98.7001	4.5033	4	115.483	9.74432	5	117.472	5.47777	9	119.51	5.69875	11
	-3.87307	89.4778	97.749	99.8916	99.1521	99.9305	98.4637	101.837		91.9579	105.474	101.811	103.006	101.902	102.146	102.732		110.928	146.976	131.745	140.012	142.401	139.879	143.997		101.78	125.426	126.328	128.822	128.429	126.241	129.138	128.649			-3.87307	98.5359	4.91095	4	115.103	9.34801	5	117.693	5.44732	9	119.762	5.56581	11
	-3.80208	89.8334	98.9566	99.3003	98.8149	99.2453	98.1508	101.319		92.1484	106.659	102.489	100.275	101.731	101.36	102.883		109.785	148.305	133.79	138.44	143.937	140.807	146.448		101.916	122.979	124.129	125.198	122.265	123.289	126.306	127.608			-3.80208	98.4206	4.60476	4	115.24	9.34364	5	116.072	5.29122	9	119.44	5.72949	11
	-3.7311	89.2956	98.6378	98.8962	99.1714	99.5035	97.1076	100.938		91.5852	107.573	102.14	101.527	101.655	101.36	101.687		109.541	147.383	133.133	138.579	141.532	140.242	143.166		103.936	123.812	126.169	123.761	123.971	122.124	127.456	126.182			-3.7311	98.5895	4.86449	4	115.26	9.24174	5	116.44	5.25162	9	118.495	5.5516	11
	-3.66012	89.3997	97.7587	98.1177	98.5259	99.9603	98.9094	99.9316		92.2312	106.538	102.344	101.157	101.598	101.603	103.458		108.611	147.962	133.114	139.316	142.28	138.991	143.706		103.13	126.416	125.295	127.385	121.666	124.692	128.098	127.03			-3.66012	98.3431	4.52486	4	115.358	9.66971	5	116.529	5.33794	9	119.118	5.51508	11
	-3.58913	89.1221	97.3046	98.4429	98.2946	100.497	98.0749	99.2378		90.6907	105.956	102.46	101.015	100.884	101.389	101.884		111.584	148.177	132.214	139.893	140.582	138.89	144.308		103.915	124.02	126.262	126.516	123.258	126.082	126.785	124.679			-3.58913	98.8279	5.39291	4	114.78	9.61999	5	116.712	5.34826	9	118.436	5.56049	11
	-3.51815	89.2002	96.725	97.6348	98.6126	99.7021	97.3826	101.515		91.3947	106.408	101.811	101.442	102.14	99.9903	102.695		110.882	147.619	132.045	138.4	140.966	139.96	143.29		102.596	121.403	125.454	123.801	123.551	123.461	126.744	126.773			-3.51815	98.5184	5.0586	4	113.958	9.51034	5	116.091	5.20096	9	118.629	5.50632	11
	-3.44743	88.4282	96.7926	96.9646	99.3063	98.6892	96.8611	100.508		91.3202	105.423	101.269	99.8483	100.675	100.602	102.016		107.042	147.705	133.227	137.883	140.724	140.464	143.436		102.962	122.067	126.328	124.789	122.621	123.262	127.018	125.655			-3.44743	97.4381	4.48472	4	113.791	9.64556	5	115.996	5.34846	9	118.293	5.59689	11
	-3.37645	89.3737	96.8602	98.5612	97.8418	98.57	96.2162	99.9805		90.0447	105.765	101.617	100.218	100.333	99.9223	101.677		109.008	146.225	133.208	139.694	141.532	139.939	144.121		104.522	124.137	123.413	122.76	121.602	123.832	125.513	126.644			-3.37645	98.2371	5.00986	4	114.31	9.32919	5	115.436	5.36985	9	118.156	5.71038	11
	-2.35742	101.171	115.255	114.497	115.907	114.826	115.628	112.606		104.166	128.081	120.397	119.879	120.723	122.057	123.038		104.237	141.441	128.668	138.818	139.895	136.226	139.177		101.947	121.377	123.93	125.026	124.392	124.679	129.781	125.591			-2.35742	102.88	0.779242	4	124.13	4.97212	5	123.538	2.41603	9	126.309	2.73957	11
	-2.28682	101.197	113.863	113.226	114.105	113.704	114.889	115.645		105.574	125.65	119.38	118.703	118.583	121.125	122.256		105.502	143.2	128.424	135.635	137.268	135.621	139.78		103.025	121.221	122.844	124.552	122.634	122.441	130.246	128.392			-2.28682	103.825	1.05742	4	123.432	5.46042	5	122.22	2.30713	9	126.022	2.64452	11
	-2.21585	101.744	114.501	112.723	114.905	114.806	113.836	112.733		104.274	125.379	120.591	118.551	118.003	121.474	120.776		105.06	141.549	127.148	133.924	136.863	134.591	137.038		101.183	123.109	125.162	123.801	122.965	121.369	127.223	127.865			-2.21585	103.065	0.945601	4	123.452	5.13105	5	122.428	2.03159	9	124.707	2.62396	11
	-2.14485	101.587	113.284	112.319	113.951	113.992	113.646	114.903		104.058	126.353	118.363	118.02	117.175	119.911	120.465		103.307	142.128	125.647	134.063	137.227	134.813	137.474		101.507	124.137	124.765	125.066	124.723	123.196	126.936	128.546			-2.14485	102.615	0.635431	4	123.644	5.40753	5	122.066	2.17695	9	124.936	2.62762	11
	-2.07388	101.162	113.081	111.747	113.123	113.744	113.324	113.613		104.149	123.782	118.615	116.749	116.015	119.571	119.617		103.185	140.176	124.09	134.142	137.47	135.399	137.495		104.093	125.01	124.632	123.788	122.137	123.381	126.033	126.786			-2.07388	103.148	0.697605	4	122.759	5.12047	5	121.224	2.18118	9	124.428	2.7439	11
	-2.0029	100.625	111.69	111.836	112.4	113.158	112.584	113.124		104.224	123.3	117.375	116.104	116.32	118.959	120.107		101.738	141.763	127.167	135.575	139.167	135.096	138.928		103.36	122.862	124.314	124.815	120.596	124.202	127.907	126.452			-2.0029	102.487	0.806739	4	122.29	5.48728	5	121.278	2.49455	9	124.804	2.92073	11
	-1.9319	99.7571	111.612	111.777	113.142	112.433	111.645	113.701		103.396	123.993	117.211	116.882	116.158	119.134	120.324		104.862	142.879	127.542	135.237	139.592	134.975	138.076		103.224	124.229	122.34	123.405	123.309	122.786	127.962	125.976			-1.9319	102.81	1.08189	4	122.898	5.71506	5	121.278	2.42719	9	124.575	2.91787	11
	-1.86092	100.998	112.926	112.004	113.547	111.648	111.807	112.948		103.412	123.15	116.91	118.617	116.234	118.658	120.71		103.734	141.227	125.497	136.669	137.045	136.206	137.474		103.161	123.968	124.275	125	121.233	126.162	127.647	124.383			-1.86092	102.826	0.620755	4	122.655	5.26776	5	121.489	2.51602	9	124.479	2.83933	11
	-1.78993	100.703	112.839	112.201	113.633	113.327	112.347	113.466		102.559	123.832	117.404	117.062	116.072	119.522	119.118		104.344	142.364	126.341	137.525	137.551	133.481	138.388		101.832	122.679	125.017	124.077	122.023	122.468	127.975	126.439			-1.78993	102.359	0.763839	4	122.783	5.45611	5	121.823	2.53788	9	124.257	2.79184	11
	-1.71895	100.546	111.448	111.412	111.851	113.456	112.632	112.235		103.586	123.923	119.012	118.124	115.682	118.192	118.939		105.335	141.935	126.285	135.097	136.176	134.43	138.305		100.974	123.669	123.943	124.236	126.735	126.625	129.398	126.426			-1.71895	102.61	1.12962	4	122.477	5.59545	5	122.082	2.41811	9	124.458	2.85637	11
	-1.64797	101.293	113.245	111.225	113.441	112.175	113.115	113.075		104.033	124.686	117.346	116.265	116.301	118.065	119.486		103.612	140.884	125.966	135.177	137.692	134.793	138.471		98.9218	109.686	107.155	109.7	107.63	108.619	111.45	107.181			-1.64797	101.965	1.17989	4	119.945	5.86122	5	116.095	3.0688	9	119.841	3.50679	11
	-1.57698	100.2	112.134	112.615	112.304	112.254	112.015	112.831		101.822	123.471	118.809	117.365	116.11	119.075	119.438		101.387	142.299	125.76	134.123	136.156	135.358	138.367		101.612	107.369	107.698	106.774	109.859	108.791	109.425	105.91			-1.57698	101.255	0.362931	4	119.578	6.26251	5	116.105	3.01105	9	119.407	3.56477	11
	-1.506	101.18	111.728	111.422	113.19	111.231	111.892	112.499		104.224	122.316	117.956	116.939	115.159	118.444	118.364		105.075	138.546	123.752	133.764	136.055	133.865	136.643		100.816	106.965	106.731	107.63	105.439	105.309	111.601	106.59			-1.506	102.824	1.07093	4	118.195	5.67861	5	115.182	3.05615	9	118.766	3.47322	11
	-1.43503	99.6357	110.917	111.659	112.111	112.085	111.37	112.626		103.371	122.617	116.271	117.299	115.454	117.376	118.082		105.533	140.433	124.522	134.501	136.681	132.714	135.833		100.628	104.57	107.486	106.616	105.146	103.945	109.535	105.627			-1.43503	102.292	1.33825	4	118.039	6.30604	5	115.115	3.15879	9	118.113	3.54885	11
	-1.36403	100.425	110.917	110.555	113.364	111.281	112.613	112.968		103.114	122.798	116.978	115.345	116.329	117.317	116.791		102.835	139.918	124.991	134.421	135.428	132.593	135.563		99.4661	104.531	102.226	105.153	101.325	104.634	107.073	103.957			-1.36403	101.46	0.897816	4	117.744	6.28545	5	113.898	3.60122	9	117.751	3.54046	11
	-1.29305	99.3928	110.646	110.969	112.612	111.539	111.266	111.991		102.352	122.959	116.862	115.886	114.256	116.783	118.543		104.755	139.211	124.484	134.222	135.671	132.694	136.311		99.3615	102.526	102.809	102.662	101.579	102.714	107.127	103.276			-1.29305	101.465	1.30169	4	117.262	6.38249	5	113.628	3.62359	9	117.33	3.72273	11
	-1.22232	99.0632	110.366	109.372	111.379	112.622	110.517	112.479		103.901	122.828	116.688	116.796	113.818	118.046	115.698		104.923	140.519	124.428	132.133	135.934	131.14	134.337		99.3091	103.125	102.147	102.293	100.955	101.39	103.557	103.687			-1.22232	101.799	1.52375	4	117.242	6.63906	5	113.271	3.54396	9	116.418	3.73229	11
	-1.15135	98.8463	110.772	109.244	112.381	111.927	111.304	112.733		103.379	121.894	116.571	116	115.102	116.579	116.866		103.246	139.597	123.827	133.784	134.923	131.201	134.213		99.8953	101.445	100.769	100.171	99.6816	100.728	104.596	101.105			-1.15135	101.342	1.15826	4	116.59	6.61295	5	112.79	3.8436	9	116.305	3.74116	11
	-1.08035	99.3407	110.154	109.796	111.157	111.956	110.052	110.945		101.996	122.175	114.954	114.169	114.551	115.482	116.536		102.058	138.975	122.927	132.292	134.236	132.089	135.729		98.2833	99.0236	100.848	99.6178	97.1596	100.437	103.105	101.644			-1.08035	100.419	0.952889	4	116.025	6.80749	5	111.676	3.80476	9	115.891	3.88314	11
	-1.00937	99.254	110.289	109.5	110.03	112.095	109.834	111.991		103.586	121.914	116.484	114.387	112.801	115.958	116.668		102.545	137.58	123.039	131.874	136.217	131.685	136.415		99.2986	99.8568	100.398	101.239	98.2295	100.185	102.38	103.058			-1.00937	101.171	1.11439	4	115.828	6.46533	5	111.975	3.70172	9	116.108	3.97635	11
	0	100	100	100	100	100	100	100		100	100	100	100	100	100	100		100	100	100	100	100	100	100		100	100	100	100	100	100	100	100			0	100	0	4	100	0	5	100	0	9	100	0	11
	0.0705833	98.3345	99.3527	98.9849	98.9594	99.4836	98.9474	99.2475		100.431	98.0215	97.2591	97.4488	98.1645	97.9604	99.3122		101.326	95.4097	97.8049	95.6626	96.3217	95.7215	96.157		99.2254	97.1358	97.2969	100.409	99.1976	97.683	100.164	101.041			0.070583	99.8291	0.658343	4	97.7809	0.707705	5	98.169	0.485173	9	98.2473	0.513152	11
	0.141583	97.8314	96.8989	98.8469	97.7069	98.5303	94.1394	98.8078		99.6604	96.4347	95.0605	95.9788	96.5002	95.2603	96.0614		99.9238	90.3904	94.4278	91.146	93.4317	91.8668	92.6257		98.7857	98.8934	96.1707	98.1154	95.1981	97.4182	101.081	98.4841			0.141583	99.0503	0.473554	4	96.2928	1.55744	5	95.8149	0.755268	9	95.9706	0.859166	11
	0.21255	98.8376	95.4497	97.6348	97.6491	97.8054	93.9782	97.2344		97.8052	95.1994	93.6271	93.8733	95.0547	93.9491	94.5915		99.6342	86.1218	91.8574	87.9228	88.8844	88.3956	89.8006		97.6447	97.1358	96.1972	95.9278	94.6249	95.0483	98.7004	98.5483			0.21255	98.4804	0.466647	4	94.3083	2.0997	5	94.3872	1.03454	9	94.0169	1.09136	11
	0.283283	98.0396	93.9426	96.8464	97.1385	96.3059	93.1342	97.254		100.903	93.1003	91.0121	91.2083	92.2016	91.8221	92.6128		102.012	82.7971	90.469	85.1373	87.0049	86.0747	86.7054		98.1262	95.1178	95.6142	97.5883	95.1853	96.2664	98.591	99.3962			0.283283	99.7701	1.00024	4	92.3608	2.4722	5	93.2954	1.37094	9	92.8239	1.43436	11
	0.354267	97.5972	93.875	95.713	94.8357	94.7368	91.8065	95.4559		100.472	90.9913	89.5206	89.871	91.4123	89.7533	90.0122		101.829	78.9575	87.8049	82.2324	83.1245	83.3703	82.8209		99.7174	94.1935	95.2961	95.3216	94.3574	96.5841	98.6183	97.7133			0.354267	99.9039	0.884343	4	90.7461	3.04446	5	91.5529	1.51324	9	90.9702	1.77	11
	0.42525	97.9788	91.8365	95.1907	94.537	93.9225	90.5737	95.7686		100.48	89.6756	88.4746	88.97	89.282	89.899	89.8521		99.619	76.834	85.7786	80.4019	81.6896	80.7265	81.3045		99.7069	94.8705	94.8456	94.5704	92.243	93.5787	96.3201	95.054			0.42525	99.4463	0.526035	4	89.6815	3.36882	5	90.416	1.65473	9	89.459	1.75784	11
	0.496233	96.9032	93.0731	94.2742	93.7759	93.3764	90.3841	93.7066		100.547	88.842	87.3995	87.9552	89.301	88.0925	88.0335		99.4818	74.4959	86.3039	78.273	78.557	78.6276	78.334		99.508	92.6572	93.1628	94.5177	92.5232	93.3934	96.4159	95.9918			0.496233	99.1099	0.776234	4	88.6685	3.65805	5	89.6986	1.76284	9	88.2579	2.07462	11
	0.567217	97.9008	91.025	94.2249	93.959	93.0884	89.7202	92.9639		99.238	87.3355	85.8208	84.7591	87.5701	86.6259	86.5542		101.143	72.1579	82.7955	76.5022	77.0008	76.7508	75.6751		96.0222	91.8891	92.8581	94.6758	91.4278	92.6519	95.4036	94.6814			0.567217	98.576	1.08036	4	87.3265	3.95077	5	88.4319	2.08892	9	86.8725	2.21217	11
	0.6382	95.7755	92.0781	93.1408	93.0726	92.3932	89.2556	91.9183		99.735	86.4015	85.1816	84.541	85.0119	85.0622	85.3199		100.579	69.541	81.5385	73.6968	75.1011	74.3491	74.865		97.2783	92.7874	91.6391	92.0796	91.5552	92.0959	92.9549	94.2061			0.6382	98.342	1.10543	4	86.7898	4.483	5	87.2997	2.20286	9	85.4673	2.28872	11
	0.709183	96.1919	90.8898	92.244	92.3499	91.2711	89.3125	91.801		97.7969	84.3226	83.7772	82.7864	84.7361	83.8481	84.2646		98.7349	68.1896	79.9437	72.3438	72.7769	72.5933	73.2655		99.4557	91.4725	92.3811	93.5293	89.1351	92.9697	93.5431	92.0606			0.709183	98.0449	0.704841	4	85.4237	4.53436	5	86.3909	2.3933	9	84.6519	2.50969	11
	0.779917	97.016	90.5903	91.5049	91.9549	90.6554	87.909	91.7131		99.619	83.4087	82.5182	82.2079	83.3	82.566	82.4084		101.692	65.7658	77.8987	70.3542	70.19	70.0908	70.752		98.4507	89.7019	92.5666	91.8556	89.8357	88.6932	92.9685	93.4995			0.779917	99.1944	0.988093	4	84.1943	4.82138	5	85.5386	2.59343	9	83.0991	2.73582	11
	0.8509	96.5389	90.513	90.8249	91.5984	89.8908	87.615	90.56		100.041	82.3541	81.0654	80.2542	81.9116	81.4977	81.1363		100.549	62.8915	77.4859	69.419	68.4519	68.5368	69.2979		97.54	89.806	89.413	89.6943	88.1289	90.2423	90.8071	94.2703			0.8509	98.6672	0.967333	4	83.2779	5.33095	5	84.1055	2.49664	9	82.2115	2.9038	11
	0.921883	95.9056	89.2667	90.4504	90.0279	88.5601	86.458	89.8954		99.4368	81.39	80.2615	80.3206	79.9715	79.9242	80.571		100.137	62.1836	75.197	65.4198	67.017	66.2361	66.2858		98.8485	89.3503	90.42	89.7074	87.4156	89.9378	92.2025	90.2235			0.921883	98.582	0.930206	4	82.5282	5.33811	5	83.0367	2.84914	9	80.793	3.06194	11
	0.992867	97.068	88.0495	89.7014	90.2014	89.9206	85.4433	89.0159		100.273	78.6884	78.9734	78.6324	79.7813	78.8753	78.3379		99.4818	60.4462	73.6023	64.1464	64.9555	64.3592	64.0424		98.3251	90.0273	86.6967	89.3648	86.1674	88.4549	89.2613	88.5149			0.992867	98.7871	0.698813	4	81.3825	5.63016	5	81.9673	2.96607	9	79.1856	3.10875	11
	1.06385	96.9032	87.3442	88.6075	89.604	88.4906	84.789	88.9768		100.091	77.6338	77.4722	78.0539	78.1645	77.4184	77.4145		99.3599	59.0734	72.5328	63.5893	63.1366	63.2694	63.0661		98.2937	88.0484	89.6648	89.7865	86.6132	87.8856	90.9713	88.926			1.06385	98.662	0.692721	4	80.1415	5.64015	5	81.7564	3.12856	9	78.5471	3.31702	11
	1.13483	96.5128	86.7356	88.775	88.4093	86.6336	84.7321	88.9084		99.6604	75.9968	75.4479	76.7166	77.0709	76.6608	75.5394		99.4208	57.3359	71.6323	61.1421	61.5804	62.1393	61.2796		97.4144	86.9548	88.3132	86.9399	85.8617	86.1115	88.249	89.4399			1.13483	98.2521	0.767899	4	79.1596	5.90294	5	80.1218	3.16965	9	77.4283	3.40037	11
	1.20582	96.6343	86.5424	88.5385	88.4767	86.6038	84.1536	86.7194		100.075	74.2493	74.9443	75.313	75.2164	75.2234	74.3899		98.3539	56.4994	69.7936	60.7441	60.4285	59.5762	59.7632		97.1004	85.8873	86.922	88.7322	85.5178	86.8397	87.3051	87.1531			1.20582	98.0408	0.769017	4	78.3433	6.00831	5	79.6719	3.31577	9	76.0699	3.4781	11
	1.2768	96.8945	83.9146	86.597	87.3013	85.3625	82.9682	86.9833		99.1221	74.0585	73.8208	74.1085	74.1512	74.6989	74.2391		100.32	55.2982	69.4559	58.1974	59.0946	59.112	59.4516		97.4563	85.5488	85.8619	84.5282	84.537	85.3436	86.4159	87.2945			1.2768	98.4483	0.782938	4	77.0834	5.88466	5	78.1304	3.30295	9	75.4321	3.49292	11
	1.34778	96.6603	85.5666	86.7744	86.9737	84.6574	83.5846	86.3285		99.9255	73.7873	73.4625	72.7049	72.8293	72.8341	72.8635		96.464	54.3973	69.7561	57.9785	58.3064	57.2755	57.5821		96.5037	85.5227	84.9609	86.4523	83.1104	83.1722	87.1272	85.9712			1.34778	97.3884	0.846761	4	77.2097	6.17474	5	77.7841	3.30801	9	74.3522	3.62043	11
	1.41877	95.5239	84.2721	85.8875	85.5285	84.0616	81.9915	85.2243		99.7432	72.8131	71.6901	71.9272	72.6106	71.3092	72.6185		97.4699	52.6169	67.3734	56.5261	56.73	57.8204	56.5019		96.2734	84.5984	84.7357	86.2546	82.9831	85.2244	86.7579	85.2133			1.41877	97.2526	0.921847	4	76.0376	6.31284	5	76.7867	3.47463	9	73.8183	3.66962	11
	1.48975	95.5413	83.9726	84.1825	84.6517	82.8302	81.0906	85.2047		99.7018	71.0455	71.1574	70.4287	71.6025	70.3186	70.8942		98.2777	51.6946	66.4165	55.4517	55.2749	55.439	55.1516		97.0585	85.3144	83.5829	84.7522	83.4925	83.5827	84.87	83.7102			1.48975	97.6448	0.885083	4	75.2419	6.44089	5	75.8626	3.49631	9	72.4672	3.73388	11
	1.56073	95.229	82.765	83.7982	84.4108	82.5621	80.4078	84.5304		98.4512	70.0311	69.5787	69.8407	70.4137	69.2599	69.7447		98.674	50.0215	65.1782	54.1186	54.6483	54.3088	53.9676		96.5037	86.0956	82.3374	84.6336	83.4034	83.9534	86.4022	84.4168			1.56073	97.2145	0.821936	4	74.5423	6.73938	5	75.1182	3.63508	9	72.0049	3.91561	11
	1.63175	95.3505	82.0307	83.4828	83.6015	81.1519	80	83.6118		99.9503	68.8862	69.046	68.5508	69.4151	68.8423	67.7		96.8755	49.8927	64.803	53.4023	53.6985	54.0464	53.0744		97.7075	83.7651	82.4169	83.4475	81.7348	83.1325	83.1327	85.316			1.63175	97.4709	0.959787	4	73.6115	6.54343	5	74.2394	3.58592	9	71.0882	3.8911	11
	1.70272	94.5611	81.7602	82.5663	82.956	81.2115	79.0706	84.2861		98.7825	67.5906	68.5036	66.9954	68.2263	67.9681	67.7942		98.8264	48.5199	63.3208	52.0294	53.3145	52.1897	51.7449		96.8492	82.1638	81.3833	82.0506	81.1234	82.1263	83.2969	82.9265			1.70272	97.2548	1.00931	4	72.5202	6.63179	5	73.286	3.67748	9	70.2677	3.95145	11
	1.77368	94.483	80.2918	81.4526	82.3201	80.7845	78.2646	81.5108		96.6705	67.9221	67.6029	66.7678	67.7699	67.1134	66.2207		98.9178	46.9755	63.2645	51.532	51.92	51.3017	51.5995		95.4046	81.0311	81.1448	82.2088	80.2446	82.4573	81.8194	82.8751			1.77368	96.369	0.960671	4	71.5346	6.63866	5	72.8744	3.67908	9	69.3502	3.93064	11
	1.84442	94.483	80.5816	82.0242	81.9539	80.0993	78.2077	82.2633		99.4948	65.9436	66.0726	66.1703	67.2848	65.7148	65.938		96.8298	46.7825	61.97	50.8754	50.9903	50.111	50.5401		96.399	81.9685	81.0123	82.3142	80.1299	80.2992	81.3269	80.7169			1.84442	96.8016	1.03247	4	71.4601	6.87257	5	72.2887	3.78887	9	68.4903	3.95402	11
	1.9154	94.2054	79.5962	80.7431	80.9327	79.0765	77.193	81.4522		100.265	65.7427	65.201	65.3642	65.9724	64.6173	64.9958		97.9729	45.9674	62.045	50.3382	50.485	49.5459	49.73		95.5511	79.9896	81.0256	82.6568	79.544	81.1466	80.9029	81.6547			1.9154	96.9986	1.33902	4	70.4078	6.71622	5	71.7982	3.80065	9	67.9723	4.04175	11
	1.98638	94.9254	79.287	79.6492	80.817	78.5104	77.0128	80.4945		99.2297	64.7384	64.9104	64.3589	64.7551	64.3842	63.4034		97.79	44.8305	61.0694	49.2439	49.6362	48.6579	48.9614		95.5302	79.7032	80.2173	81.3258	79.0473	80.1006	82.5855	81.462			1.98638	96.8688	0.999637	4	69.6417	6.83393	5	71.0556	3.84097	9	67.4049	4.1477	11
	2.05737	94.3442	78.7267	79.6393	79.4489	77.7458	75.78	79.8593		99.089	64.4672	63.138	62.9458	64.2225	62.9662	62.9417		97.4547	44.1227	58.9306	47.9904	49.0097	48.7588	47.8604		97.1423	80.3281	80.2968	80.7196	78.0538	79.24	81.2175	80.2544			2.05737	97.0075	0.985041	4	69.4568	6.98037	5	69.9188	3.97705	9	66.5555	4.07997	11
	2.12835	93.8151	78.0214	78.9002	79.7379	77.9841	75.2963	79.7029		99.3788	63.2018	62.6731	63.1165	63.224	62.7914	61.8675		96.6773	43.9296	59.7749	47.1548	48.1609	47.4874	47.6111		96.7759	78.5835	78.826	79.8366	77.1494	79.4651	78.9193	79.5349			2.12835	96.6618	1.13649	4	68.5273	6.8274	5	69.5837	3.92695	9	65.8237	4.08928	11
	2.19933	93.763	77.4128	78.3877	78.6685	76.4846	74.4808	79.2045		98.4843	61.9865	61.9274	61.9879	61.9401	61.1791	61.5283		96.3877	43.5435	58.8368	46.5778	46.4228	46.6599	45.7		95.8442	79.8594	79.1573	78.6637	78.2321	78.2073	78.8509	78.9568			2.19933	96.1198	0.970107	4	68.238	6.96831	5	68.9484	3.973	9	64.8301	4.20215	11
	2.27032	94.2228	76.7172	78.2891	77.6279	76.0874	73.9782	77.2989		96.9521	61.8058	61.5109	61.2291	61.8925	60.6352	60.6238		97.4242	42.9	57.8987	46.1799	46.8876	46.3169	45.6793		95.8338	78.2711	76.335	78.5055	76.9456	77.6248	78.7415	79.2652			2.27032	96.1082	0.711465	4	67.5966	6.90983	5	68.0356	3.88026	9	64.4494	4.13248	11
	2.34103	94.5784	76.4371	78.1315	77.2714	75.5214	73.2101	77.426		99.0475	61.0726	60.3293	59.6453	61.0271	60.6061	60.2469		96.3877	42.1922	58.1238	45.9411	46.2409	45.5903	45.6377		95.9175	78.3101	77.4347	78.1234	75.4299	77.0952	77.3735	77.6721			2.34103	96.4828	0.936889	4	67.2287	7.03984	5	67.5356	3.90879	9	63.8296	4.07648	11
	2.41202	93.5635	75.0845	77.0178	76.6548	75.2135	72.2617	76.9374		98.8074	60.3696	59.6029	58.953	60.6942	59.0715	59.1162		96.2963	42.0206	57.1295	45.5631	45.5538	45.005	44.4121		95.5511	76.6567	76.3747	78.3737	75.035	76.7907	77.8523	78.8155			2.41202	96.0546	1.08379	4	66.2298	6.79682	5	66.9889	3.94216	9	63.3191	4.20967	11
	2.483	93.3553	75.413	76.1802	75.9707	74.1311	72.2238	76.4683		97.035	59.1242	59.4383	58.8866	59.3153	58.5956	58.2305		97.3937	41.4629	56.5854	44.5682	45.1496	44.3592	44.0382		96.6607	77.529	76.0302	74.7364	75.6337	76.8304	77.4419	78.019			2.483	96.1112	0.930726	4	65.9418	6.98028	5	66.2201	3.8666	9	62.7883	4.23491	11
	2.55373	92.8869	74.4759	75.9436	75.065	74.568	71.1427	75.2468		97.623	59.0439	58.2857	57.7295	59.068	57.8963	57.9666		95.4885	41.4414	56.8856	44.031	44.0986	43.3502	43.2904		97.8227	77.2035	77.3287	76.0807	74.8567	76.5126	77.8112	76.9527			2.55373	95.9553	1.15114	4	65.6217	6.88124	5	66.0923	4.00959	9	62.1215	4.26735	11
	2.62472	93.8498	74.7754	75.6086	74.9783	73.7637	71.7686	75.6963		98.3518	57.8487	57.3559	57.5209	58.3738	58.042	56.6569		95.0312	40.4547	56.0788	43.9515	43.8359	42.9667	42.9373		96.5979	76.7478	75.3014	75.6721	73.099	75.0563	75.3625	76.6701			2.62472	95.9577	0.976536	4	65.087	7.06995	5	65.3024	3.90539	9	61.5788	4.21927	11
	2.69543	93.9712	73.8576	74.83	74.564	73.3962	70.3082	74.4747		97.6313	57.2662	57.2397	56.9708	57.0328	56.284	56.7229		98.11	40.0043	55.272	43.5137	43.5125	42.6438	41.6078		97.3516	75.5891	77.554	74.855	73.2391	74.2751	76.3885	75.2312			2.69543	96.766	0.944678	4	64.3094	6.96214	5	65.1783	4.02297	9	60.7711	4.21932	11
	2.76643	93.4421	73.5581	74.5935	73.8318	72.86	70.4694	73.6148		98.534	57.216	56.155	56.5061	56.5573	56.4103	55.253		96.4335	39.4466	55.4034	42.8173	42.8456	42.0989	41.5663		96.0013	73.9747	75.5267	76.4365	73.4429	74.103	75.6635	75.9121			2.76643	96.1027	1.04523	4	63.7578	6.89809	5	64.7755	4.0599	9	60.4086	4.25587	11
	2.8374	92.9389	73.7513	73.8051	73.8703	72.2741	70.0332	73.605		97.2834	56.6034	55.9031	55.7853	56.1008	55.0019	55.5357		94.7569	38.9961	54.5591	42.5388	41.8351	41.9374	41.5039		96.9015	75.6802	74.0427	74.6442	72.9334	74.7782	75.2257	74.0622			2.8374	95.4702	1.01047	4	63.7672	7.09679	5	64.0612	3.98358	9	59.9654	4.25564	11
	2.9084	94.11	73.6547	73.9036	72.7238	71.43	69.4358	72.96		99.8095	55.9004	55.322	55.1404	55.9201	54.5552	54.5746		96.5859	38.4384	54.7467	42.1011	41.734	41.2916	40.7146		96.0013	74.1049	72.5454	73.7217	72.2201	73.3483	73.0643	74.1521			2.9084	96.6267	1.18522	4	63.2004	7.10354	5	63.3279	3.87538	9	59.2501	4.19008	11
	2.97938	94.2054	72.0413	73.1448	72.8683	71.0328	69.5685	72.8819		99.619	54.8057	54.8281	54.6472	55.0832	53.9821	53.4816		97.6223	38.181	53.9775	41.5042	41.1277	41.1907	40.3199		96.6189	74.9902	75.1159	74.262	70.7426	72.6599	73.1601	75.1927			2.97938	97.0164	1.12548	4	62.6326	7.10944	5	63.2198	4.03986	9	58.968	4.27487	11
	3.05035	93.0257	71.4907	72.859	71.9433	70.8143	69.1133	71.8655		97.0267	54.0123	54.2954	53.3858	54.3699	52.8943	53.5193		95.5037	38.0094	53.621	40.5292	40.5416	40.4238	40.0706		96.0955	73.3238	74.1884	72.0875	71.545	70.9917	72.6129	73.3042			3.05035	95.4129	0.85524	4	61.939	6.98409	5	62.49	4.04933	9	58.1552	4.18497	11
	3.12135	93.0864	70.9786	72.3564	72.4058	70.3873	68.1366	72.5691		97.0184	53.4498	52.9201	53.1582	53.6186	52.8263	52.5582		97.668	38.3955	53.2458	40.5889	40.6427	40.5651	39.3436		96.6398	73.5581	71.4191	72.9441	70.7553	71.0446	74.2681	74.9101			3.12135	96.1032	1.02775	4	61.7477	6.89717	5	61.9805	4.01294	9	58.2257	4.33181	11
	3.19233	92.4705	70.8627	72.2677	71.6928	69.7815	67.8141	71.3769		96.7451	53.6105	53.0266	52.6461	53.3524	51.9911	51.8138		95.6104	37.7735	52.8518	40.4099	40.4002	39.2533	38.8866		96.0536	71.3839	70.5711	72.3774	69.2523	72.7261	72.2572	72.7903			3.19233	95.2199	0.94573	4	61.1797	6.80431	5	61.4011	3.91377	9	57.5147	4.30015	11
	3.26305	93.0777	70.969	71.6468	71.4327	69.3148	67.2641	71.201		97.1012	52.9778	52.7458	52.058	52.0114	51.7094	50.9846		95.8695	37.4303	52.6829	40.3701	39.1876	39.3138	38.4296		96.4828	71.1886	71.1276	72.272	69.3033	71.4551	72.0109	72.4306			3.26305	95.6328	0.88803	4	60.8425	6.84217	5	61.2564	3.94197	9	56.9089	4.30994	11
	3.33403	92.67	70.2444	70.4149	70.5174	68.4111	67.6055	69.9599		97.4656	51.9735	51.816	51.6787	51.8783	51.0004	51.2673		97.3175	36.465	52.1388	38.9773	39.329	38.0626	38.5542		97.5819	72.5426	70.9686	71.2441	69.2651	71.2432	70.1505	73.7667			3.33403	96.2588	1.19747	4	60.3281	7.03035	5	60.5575	3.99847	9	56.6198	4.30855	11
	3.40477	92.7481	69.4909	70.6416	70.8642	68.5998	66.5055	69.4811		95.4033	52.0739	51.6901	51.195	51.3742	50.5536	50.2591		96.5402	36.5937	50.9381	39.4548	39.3897	38.3451	37.8064		94.0438	71.0324	71.2601	70.282	69.9911	70.6607	71.8605	71.4157			3.40477	94.6838	0.82262	4	59.9665	6.83997	5	60.475	4.03646	9	56.1501	4.26254	11
	3.47548	93.3813	69.6358	69.9714	70.026	68.2324	66.2968	69.0316		98.592	51.5015	51.0508	50.2561	51.203	50.2137	49.8728		95.9	36.3149	51.1632	39.5145	38.4196	38.446	37.0794		96.6084	70.9413	69.8291	71.7185	69.074	69.7206	69.7127	71.39			3.47548	96.1204	1.07619	4	59.673	6.87264	5	60.0961	4.00911	9	55.5806	4.21717	11
	3.54648	93.1211	69.3556	70.07	70.0549	68.3813	65.3295	68.455		97.8963	50.7281	50.3051	49.6965	50.0999	49.8252	49.0813		96.9517	35.6928	51.0507	38.2014	38.2781	38.1231	36.8509		94.138	70.2383	71.1674	71.02	69.316	69.9192	69.8222	71.9681			3.54648	95.5268	1.13141	4	59.217	6.95519	5	59.9104	4.1827	9	55.2502	4.26072	11
	3.61745	93.39	68.3799	68.9268	69.0529	66.4747	65.1114	68.0543		98.1282	50.4268	49.5981	49.3741	50.1094	48.8733	48.3746		95.5495	35.7143	50.5066	37.7437	38.8238	37.3562	36.9547		95.122	69.5482	70.0278	69.4518	66.9724	69.6942	69.7811	70.5164			3.61745	95.5474	0.978772	4	58.5992	6.7554	5	58.8002	4.00695	9	54.8772	4.21211	11
	3.68845	92.4011	67.6746	69.5279	68.5712	66.6336	64.5235	67.9371		96.6291	49.6535	49.2785	49.099	49.9287	48.5043	48.4406		94.5892	36.0146	51.9512	38.0422	37.5505	37.1948	36.1238		95.5825	69.8086	69.6436	68.3448	68.0296	69.4161	69.7127	71.056			3.68845	94.8005	0.901718	4	58.5359	6.77319	5	58.8437	3.93216	9	54.5807	4.29267	11
	3.75943	92.1842	68.119	68.3552	67.6655	66.2463	64.7795	67.7221		98.4512	49.3522	48.7264	48.9378	48.7494	47.9021	48.2804		97.5309	34.8563	50.8068	37.3458	37.308	36.6902	35.6668		93.9286	69.0014	68.3848	69.6231	68.1569	69.4161	68.4679	69.6429			3.75943	95.5237	1.4803	4	57.9368	6.85949	5	58.4326	4.00053	9	54.0569	4.27249	11
	3.8304	91.9153	67.7519	67.961	67.3572	65.4916	63.7174	67.1651		97.5153	49.1413	48.7651	47.4108	48.7019	47.5719	47.6114		94.2234	35.0279	49.7749	37.505	36.7623	36.3068	36.2069		96.42	68.6109	69.0076	68.1603	67.571	68.7144	68.8235	69.3602			3.8304	95.0185	1.24029	4	57.6986	6.75519	5	57.8937	3.98729	9	53.722	4.23843	11
	3.9014	91.7245	66.5733	67.9905	67.1452	66.0278	63.9734	67.3703		97.8797	48.8099	48.1646	47.923	47.8174	47.3776	46.6503		94.8026	34.4058	49.9812	36.53	36.8634	35.9031	36.0823		95.5721	67.5303	67.5368	66.8819	66.4629	67.3507	67.7839	69.9769			3.9014	94.9947	1.27109	4	57.062	6.71149	5	57.4059	3.92623	9	53.3772	4.2381	11
	3.97237	92.7481	66.2931	66.936	66.7791	65.0348	62.8924	66.0901		97.4739	48.2977	47.6804	47.316	47.5892	46.5035	46.2169		95.1532	34.32	49.8311	36.8882	37.0655	35.2371	35.2514		95.9384	67.8297	67.7885	67.9362	66.068	67.9862	67.6334	69.7456			3.97237	95.3284	0.985904	4	56.7353	6.67881	5	57.258	3.93405	9	52.9283	4.25358	11
	4.04335	93.0083	66.1868	66.8966	66.384	64.1212	62.2285	65.5429		98.062	47.6549	46.7022	46.5193	47.2943	46.4355	46.0473		97.0889	34.2128	48.9306	36.4903	36.5602	36.004	35.2306		94.4625	67.3871	66.967	67.6595	65.8642	67.9995	66.7442	69.1932			4.04335	95.6554	1.16463	4	56.4676	6.69105	5	56.6265	3.96287	9	52.6618	4.17373	11
	4.11433	93.2078	65.356	67.0937	65.594	64.4091	62.1147	66.0119		97.6727	47.8357	46.5666	45.8365	47.2183	45.7459	45.9342		95.5799	34.2986	48.8931	36.53	36.6006	35.3784	35.3968		94.5253	67.0095	67.4175	66.3416	65.6095	67.3904	65.4993	68.3068			4.11433	95.2464	0.943127	4	56.3187	6.59134	5	56.3553	3.93197	9	52.327	4.12347	11
	4.18533	92.0802	64.9502	66.2166	65.5073	64.002	62.3234	64.4972		96.8445	47.2532	46.1017	44.9071	45.8963	45.6682	45.5196		96.9974	33.5907	49.3058	36.351	35.5901	35.1968	34.3166		97.1213	66.7752	66.4635	67.1587	64.2466	66.2253	66.922	67.7158			4.18533	95.7608	1.2282	4	55.7572	6.6294	5	56.0048	3.92349	9	51.8065	4.17572	11
	4.2563	91.8893	64.3803	65.3198	65.7578	63.6544	61.5173	64.8588		97.1426	46.3192	45.9758	45.0303	45.8678	44.6193	44.9166		96.2963	33.4406	48.424	35.4158	35.7114	34.9142	34.7736		95.4988	65.6165	67.1923	65.7486	64.4886	66.7285	66.5253	67.0478			4.2563	95.2068	1.15562	4	55.0153	6.50907	5	55.7431	3.99216	9	51.5891	4.16114	11
	4.3273	91.8893	64.8633	65.3099	65.093	62.9096	61.0431	64.3799		96.5463	46.269	45.5981	44.338	44.7836	44.629	44.1157		94.7264	33.4835	48.0863	35.5352	35.0647	34.4702	33.9219		96.4828	64.4578	66.808	65.3664	63.7244	65.9208	64.6101	67.3561			4.3273	94.9112	1.09199	4	54.8767	6.45037	5	55.2732	3.93615	9	50.9359	4.1568	11
	4.39828	92.0802	63.8682	64.6891	64.6112	63.3863	60.5974	64.0868		96.6788	45.114	44.3777	44.0345	44.4888	44.1725	44.3701		95.2141	33.3333	47.8424	35.197	34.8626	34.4299	33.4233		94.8812	65.4602	64.3567	65.485	63.2913	65.5369	64.4733	67.8828			4.39828	94.7136	0.960717	4	54.493	6.51088	5	54.7313	3.91711	9	50.7568	4.17514	11
	4.469	92.9042	64.0325	64.9157	64.3511	62.6713	60.863	63.5395		95.9417	44.8027	44.8717	44.6036	44.8597	43.8908	43.7859		96.0524	33.5478	47.4672	34.9184	35.1455	34.9142	33.3403		94.2217	65.7597	65.7877	66.0912	63.3295	64.5571	63.4884	65.5576			4.469	94.78	0.752706	4	54.6117	6.55403	5	54.8991	3.95399	9	50.3584	4.00447	11
	4.53998	92.5659	64.4189	63.9696	64.0042	62.433	59.9052	63.3539		94.3184	45.0839	44.0872	43.437	43.8421	43.3081	43.4938		95.961	33.1617	47.8424	35.1174	34.5998	34.3088	33.361		94.8707	64.9395	64.0652	64.8392	63.6607	64.107	64.0356	66.3155			4.53998	94.429	0.708599	4	54.3147	6.48404	5	54.3874	3.88424	9	50.0573	4.07193	11
	4.6107	91.9067	63.4818	63.5952	63.8212	61.7776	60.0284	62.6405		96.3061	44.0494	44.1259	43.5508	43.7946	43.2595	43.5033		94.2692	33.2475	47.7111	34.6399	34.2361	33.8648	33.1948		95.1115	64.2234	64.9132	64.3384	62.0048	63.2067	64.0356	65.8787			4.6107	94.3984	0.929754	4	53.7195	6.38661	5	54.0981	3.85135	9	49.7857	4.0461	11
	4.6817	92.2623	63.047	64.0682	63.4165	61.5492	59.2698	62.3962		96.8527	43.7682	43.2833	42.9344	43.1479	42.6476	42.5139		96.6469	32.84	47.0544	34.5205	34.7413	33.4612	32.7794		93.7821	63.8068	63.9459	63.9958	61.0113	63.776	63.6799	65.0951			4.6817	94.886	1.12068	4	53.506	6.44441	5	53.5235	3.8308	9	49.4098	4.04576	11
	4.75268	92.4358	62.3032	63.2798	62.4819	60.576	59.2034	62.9336		96.2813	43.2158	43.5351	42.28	42.8911	42.4145	42.7589		96.8145	32.4324	47.3546	34.4608	34.1754	33.0777	33.0079		94.1484	64.3406	63.1774	63.9035	61.7883	63.5244	62.1888	64.9794			4.75268	94.92	1.00866	4	53.1144	6.47889	5	53.2842	3.77557	9	49.1959	4.03029	11
	4.82367	91.7852	62.6606	62.994	62.7035	61.4399	57.6292	62.1421		96.2233	43.4267	42.3632	42.28	42.8911	42.1717	41.4303		93.9491	32.3252	46.5854	34.1226	34.2361	33.4208	32.634		93.7925	63.5725	62.3559	62.9547	61.8775	61.4987	61.6005	63.7333			4.82367	93.9375	0.907299	4	52.9958	6.41903	5	52.9647	3.8304	9	48.4898	3.86847	11
	4.89465	91.5944	62.081	61.8705	62.4434	61.0427	57.2119	61.1551		95.3288	42.8643	42.2567	42.1756	42.6343	41.2685	41.6188		95.5952	32.1107	47.0169	33.4859	33.5691	32.9768	32.6132		94.7765	62.5439	62.4884	63.7981	59.9032	61.7503	62.5718	64.0416			4.89465	94.3237	0.925614	4	52.2941	6.28029	5	52.7345	3.83097	9	48.3101	3.93253	11
	4.96563	149.115	32.5089	30.9845	33.2402	33.8928	34.1679	34.721		108.125	21.9243	21.2203	20.9124	20.7893	21.4258	18.9485		92.1811	10.4033	25.5535	10.7441	10.5093	10.6155	9.53469		103.611	12.0557	8.8777	8.86927	5.91008	6.0903	5.52668	5.78109			4.96563	113.258	12.4143	4	21.5753	4.60237	5	18.8023	3.5753	9	16.1918	3.23963	11
	5.03662	148.508	29.7846	28.6784	31.0724	31.8669	31.2091	31.6525		108.307	20.1768	19.3608	19.6036	19.2202	19.7358	17.0922		92.806	10.5963	25.4597	10.5253	10.1657	10.1514	9.11924		105.757	10.0508	7.16841	7.34054	5.15858	5.52099	4.80164	5.04882			5.03662	113.845	12.0424	4	19.8574	4.2332	5	17.5062	3.48165	9	14.8834	2.95243	11
	5.1076	151.457	28.1712	26.8552	29.7331	31.3505	30.2418	31.1737		109.831	19.3532	18.1695	18.9017	18.621	18.2887	16.15		93.248	10.5105	24.9906	10.2268	10.3678	10.1514	9.57624		106.762	8.21508	6.5324	6.51028	4.81467	5.07083	4.30917	4.72765			5.1076	115.325	12.5713	4	18.621	4.08417	5	16.8033	3.43697	9	14.4253	2.87355	11
	5.17832	151.778	27.5336	25.8894	28.6155	30.5859	28.9142	29.8251		109.144	18.3891	17.6949	18.3801	17.7936	17.5505	15.8391		91.0075	10.4247	25.2158	10.4059	10.4487	10.4743	9.34774		103.643	7.17355	5.61813	5.9436	4.25424	4.36912	4.02189	4.29085			5.17832	113.893	13.1867	4	17.8821	4.04852	5	16.3016	3.42118	9	13.8977	2.75747	11
	5.2493	152.412	26.6834	24.7659	27.4208	30.0596	27.9184	27.6752		108.514	17.9472	17.0266	17.3843	17.0994	16.657	15.2266		90.3978	10.5963	24.6529	10.5054	10.3678	10.0706	9.03614		103.925	6.3924	5.28687	5.39009	4.2415	4.15729	3.95349	4.02107			5.2493	113.812	13.4287	4	17.277	3.92505	5	15.7742	3.33601	9	13.2894	2.60072	11
	5.3203	151.908	25.3792	24.3225	26.1297	28.9573	26.6572	25.9846		109.781	17.0734	16.3971	16.2841	16.5858	15.9285	14.6613		92.2878	10.3389	25.1032	10.6248	10.4487	10.3935	9.36851		103.768	5.91069	4.80986	5.08698	3.74475	3.86601	3.54309	3.75128			5.3203	114.436	13.007	4	16.6049	3.81049	5	15.2375	3.274	9	12.8353	2.45673	11
	5.39102	149.54	24.2682	23.5932	25.2818	27.6763	25.0166	25.1051		108.398	16.4809	15.6998	15.6866	15.4541	15.2486	13.9734		89.3309	10.4462	25.2533	10.187	10.287	10.333	9.38928		106.071	5.5071	4.43885	4.74433	3.47726	3.65418	3.67989	3.62282			5.39102	113.335	12.7937	4	16.0591	3.65499	5	14.7161	3.21547	9	12.3422	2.31173	11
	5.462	150.512	23.7079	22.7555	24.405	25.8491	23.5467	24.2353		107.785	15.8984	15.4383	15.0228	15.1308	14.7436	13.5023		91.7543	10.4676	24.9343	10.5452	10.4285	10.2321	9.38928		106.396	5.31181	4.17384	4.40169	3.36263	3.6277	3.40629	3.45581			5.462	114.112	12.6635	4	15.6282	3.52995	5	14.237	3.08357	9	11.9726	2.19911	11
	5.53298	150.486	23.1765	21.9671	23.5668	25.3625	22.6932	23.434		107.537	15.2154	14.7409	14.7762	14.3604	14.4619	12.8239		91.1446	10.7036	25.4784	10.6446	10.388	10.1715	9.20233		107.851	4.8301	4.01484	4.13811	3.31168	3.44234	3.33789	3.50719			5.53298	114.255	12.6915	4	15.1785	3.44361	5	14.0038	3.06412	9	11.6203	2.11051	11
	5.60397	149.054	22.4326	21.5039	22.7479	24.4588	21.982	22.5936		108.315	14.8438	14.4407	14.2925	14.2273	13.986	12.268		90.9008	10.5749	24.6904	10.5253	10.3274	10.2321	9.36851		104.606	4.59576	3.74983	3.95361	3.15883	3.3629	3.09166	3.37873			5.60397	113.219	12.5184	4	14.7902	3.35543	5	13.5575	2.96815	9	11.3471	2.0389	11
	5.67495	150.546	21.4279	21.0604	22.3817	23.6147	20.9578	22.0952		108.191	14.6932	14.0048	14.1502	13.7042	13.3936	12.0984		93.1108	10.5963	24.1651	10.7242	10.1051	10.2321	9.2231		105.014	4.43953	3.59083	3.88772	3.0442	3.21726	3.16005	3.21172			5.67495	114.216	12.5376	4	14.4435	3.22108	5	13.2848	2.89351	9	11.0362	1.96269	11
RAW DATA
		0	50/0	50/0	50/0.5	50/0.5	50/2	50/2		0	50/0	50/0.5	50/0.5	50/2	50/2	50/2		0	50/0	50/0.5	50/0.5	50/2	50/2	50/2		0	50/0	50/0.5	50/0.5	50/0.5	50/2	50/2	50/2
		12853	12513	12772	13020	12772	13270	13049		13712	13271	12917	12707	12975	12626	13301		9082	8692	8760	8702	8845	8571	8680		11820	11530	11503	11449	11620	11424	11417	11564
		12763	12504	12444	12890	12720	13324	13245		13255	12437	12766	12477	12878	12573	13135		8986	8619	8718	8740	8656	8621	8660		11729	11323	11508	11481	11500	11325	11254	11466
		12623	12373	12424	12824	12317	13010	12700		13202	12170	12577	12550	12682	12395	13107		8953	8535	8588	8658	8782	8583	8619		11704	11613	11259	11124	11445	11148	11503	11551
		12503	12314	12256	12689	12323	12980	12528		12638	12100	12497	12313	12660	12316	13042		8982	8415	8640	8491	8739	8535	8599		11186	11326	11110	10778	11400	11252	11404	11281
		12434	12180	12149	12407	12231	12677	12517		12743	12151	12214	12229	12457	12092	12835		8714	8395	8573	8563	8624	8475	8465		11484	11187	11261	10666	11226	10966	11245	11104
		12294	11907	11981	12281	11992	12463	12415		12537	11949	12050	12280	12310	11891	12677		8719	8319	8524	8384	8556	8436	8515		11286	11116	11074	10691	11230	11087	10751	11167
		12231	11929	11920	12185	11917	12428	12350		12704	11852	12031	12132	12212	11899	12627		8814	8276	8485	8457	8555	8284	8379		11299	11052	10923	10492	11001	10995	11025	11079
		12052	11746	11808	12081	11728	12303	12195		12234	11653	11993	12040	12108	11911	12397		8861	8257	8414	8377	8458	8232	8356		11070	10918	10837	10515	10786	10868	10772	10991
		12107	11563	11634	11970	11745	12232	12134		12146	11749	11903	12021	12104	11798	12275		8452	8132	8340	8286	8309	8058	8370		11158	10871	10738	10338	10823	10709	10768	11018
		11913	11684	11537	12001	11593	12303	11802		12076	11569	11729	11810	12031	11722	12237		8554	8005	8289	8237	8252	8052	8233		10927	10534	10669	10365	10706	10511	10637	10833
		11780	11525	11523	11820	11632	12078	11891		12298	11571	11807	11829	11914	11690	12222		8549	8036	8240	8150	8253	8002	8204		10870	10506	10610	10297	10757	10747	10445	10709
		11722	11391	11460	11933	11445	11910	11747		12256	11511	11726	11781	11948	11641	12138		8490	7923	8125	8102	8142	7910	8036		10699	10675	10375	10165	10378	10341	10352	10231
		11607	11340	11374	11745	11513	11870	11684		12127	11476	11689	11594	11922	11560	12121		8470	7817	7858	8042	8113	7871	8046		10629	10567	10054	10301	10238	10315	10433	10234
		11497	11341	11398	11603	11412	11749	11609		11647	11549	11626	11603	11712	11520	12139		8254	7805	7814	8024	8120	7809	7968		10691	10381	10133	10096	10431	10279	10122	10081
		11502	11285	11353	11562	11359	11824	11468		11716	11473	11593	11607	11676	11401	12030		8320	7730	7853	7925	8018	7661	8054		10751	10445	10087	9953	10413	10337	10188	10352
		11376	11215	11217	11599	11232	11737	11242		11816	11485	11574	11555	11601	11303	12044		8187	7766	7737	7896	8032	7636	8080		10685	10223	10216	9904	10083	10157	9923	10061
		11272	11159	11252	11499	11175	11598	11452		11572	11348	11360	11496	11551	11303	11814		8063	7689	7782	7893	7935	7669	7874		10502	10048	9975	9857	10084	9952	10057	10071
		11215	11074	11182	11331	11109	11498	11290		11754	11192	11336	11483	11495	11220	11786		8061	7671	7742	7808	7921	7661	7858		10363	10076	9892	9706	10068	10045	9906	10123
		11266	11112	11097	11389	11061	11443	11111		11604	11235	11303	11459	11434	11328	11941		8022	7567	7697	7852	7893	7538	7862		10279	10101	10012	9786	10169	9944	9819	10084
		11224	10994	11063	11255	11065	11248	10973		11171	11184	11212	11372	11467	11183	11763		7876	7587	7682	7743	7748	7577	7734		10219	10101	9850	9789	9726	9675	9773	10109
		11228	11043	11045	11342	10925	11434	11108		11408	11193	11323	11413	11382	11170	11755		8066	7496	7664	7693	7734	7470	7768		10030	10001	9787	9576	9773	9845	9740	9989
		11118	11001	10932	11343	10978	11283	10952		11395	11352	11259	11493	11409	11290	11881		8070	7537	7639	7665	7643	7498	7659		10128	9935	9789	9584	9994	9720	9828	9935
		11156	11013	10998	11377	11003	11405	11065		11385	11192	11229	11352	11463	11062	11705		7823	7444	7549	7630	7647	7440	7531		10119	9771	9601	9751	9771	9773	9643	9935
		11027	10867	10895	11284	11019	11466	10943		11469	11263	11175	11299	11287	11125	11583		8029	7448	7487	7633	7575	7390	7570		10191	9820	9739	9802	9742	9570	9777	9699
		11029	10963	10901	11240	10860	11384	10890		11439	11134	11219	11306	11353	11112	11548		7850	7398	7455	7475	7572	7380	7605		9867	9809	9746	9702	9822	9547	9547	10006
		11056	10798	10876	11109	10942	11416	10915		11485	11082	11215	11337	11234	11051	11608		7828	7316	7503	7458	7492	7395	7484		10007	9882	9575	9773	9660	9643	9668	10032
		11004	10847	10878	11068	10865	11229	10786		11293	11092	11149	11229	11260	11112	11477		7752	7310	7519	7478	7413	7317	7344		10176	9942	9689	9450	9693	9498	9508	9858
		10944	10777	10688	11111	10794	11298	10907		11447	11125	11124	11265	11214	10992	11468		7707	7331	7492	7439	7407	7250	7314		10005	9593	9595	9480	9661	9552	9514	9664
		11007	10800	10805	10993	10734	11269	10789		11205	11185	11081	11319	11165	10972	11396		7633	7261	7371	7380	7402	7259	7306		9994	9658	9477	9556	9645	9737	9520	9882
		10941	10703	10755	10970	10649	11279	10545		11395	11108	10992	11125	11148	11038	11402		7691	7168	7369	7295	7326	7182	7311		9887	9693	9599	9539	9730	9362	9361	9841
		10917	10676	10632	10936	10714	11171	10875		11105	11053	11022	11140	11181	10986	11393		7530	7185	7342	7287	7374	7247	7226		9931	9582	9423	9543	9737	9438	9529	9760
		10923	10740	10630	11050	10650	11023	10751		11353	11052	11201	11244	11024	10945	11371		7585	7175	7339	7239	7238	7197	7126		9851	9560	9348	9525	9491	9562	9455	9690
		10849	10670	10497	10962	10570	11005	10618		11510	10961	10943	11085	11117	10929	11335		7620	7173	7380	7159	7326	7149	7177		9926	9534	9313	9604	9537	9598	9611	9625
		10855	10701	10646	10796	10674	11054	10644		11281	10982	10963	11146	10933	10814	11339		7689	7104	7338	7205	7228	7158	7155		9762	9688	9555	9668	9554	9488	9445	9708
		10846	10622	10494	10818	10529	10888	10598		11198	10950	10992	11171	11055	10887	11333		7544	7088	7302	7191	7252	7116	7156		9736	9599	9279	9443	9465	9269	9545	9826
		10768	10568	10522	10823	10471	10854	10714		11261	10966	10812	11083	11016	10864	11318		7520	7087	7282	7142	7174	7073	7080		9789	9587	9259	9507	9523	9410	9364	9625
		10770	10571	10557	10806	10502	10841	10604		11324	10992	10798	11048	11044	10805	11193		7525	7032	7233	7153	7164	7067	7092		9594	9535	9401	9239	9466	9560	9445	9675
		10757	10606	10490	10765	10505	10708	10595		11224	10870	10877	11093	11033	10768	11173		7455	7051	7345	7133	7220	7094	6987		9658	9670	9418	9452	9574	9415	9423	9959
		10759	10569	10406	10777	10471	10778	10471		11304	10822	10835	11059	10861	10772	11244		7345	7011	7192	7076	7184	7091	7026		9544	9587	9388	9389	9586	9365	9421	9795
		10767	10530	10370	10604	10342	10772	10620		11336	10758	10758	10881	10896	10744	11107		7498	7153	7254	7128	7111	7012	7030		9806	9370	9347	9436	9487	9256	9435	9774
		10733	10536	10466	10615	10357	10725	10450		11200	10771	10754	10959	10912	10658	11072		7469	6990	7214	7015	7105	6981	7066		9496	9508	9327	9466	9373	9280	9401	9902
		10659	10467	10314	10591	10346	10675	10568		11029	10801	10785	10934	10828	10739	11120		7385	7022	7174	7061	7102	6996	7011		9685	9534	9435	9355	9414	9288	9441	9872
		10701	10394	10332	10490	10263	10686	10506		11295	10847	10781	10948	10781	10647	11093		7288	7036	7077	7075	7102	7037	7037		9555	9549	9431	9250	9266	9303	9236	9993
		10672	10390	10308	10472	10348	10586	10553		11131	10760	10671	10866	10804	10662	11047		7428	6935	7229	7042	7069	7005	7046		9757	9316	9277	9364	9383	9275	9402	9696
		10583	10334	10176	10511	10200	10540	10545		11117	10668	10614	10741	10721	10504	11203		7388	6991	7168	7083	7163	7035	6986		9609	9560	9290	9381	9373	9388	9194	9702
		10633	10217	10140	10569	10316	10523	10492		11103	10740	10702	10753	10718	10522	11043		7186	6921	7090	7075	7087	6961	7001		9660	9465	9218	9214	9317	9134	9228	9720
		10556	10343	10150	10442	10179	10575	10389		11133	10749	10698	10828	10675	10675	10996		7420	6906	7107	7067	7062	7014	6916		9661	9404	9296	9108	9498	9269	9255	9650
		10602	10329	10165	10391	10110	10436	10481		11044	10613	10628	10782	10780	10467	11071		7214	6976	7126	7085	7120	7003	6980		9496	9422	9054	9286	9334	9389	9376	9921
		10410	10211	10106	10374	10244	10429	10409		11168	10706	10699	10839	10718	10581	10976		7340	6985	7108	6952	7054	6985	6899		9644	9461	9213	9217	9175	9083	9268	9879
		10441	10265	10091	10415	10154	10411	10378		11139	10710	10576	10671	10649	10521	11027		7329	6926	7120	7009	7118	7019	6912		9623	9640	9702	9466	9936	9521	9543	9895
		10445	10193	9954	10283	10047	10300	10356		11078	10698	10584	10753	10648	10447	10921		7157	6983	7161	7046	7029	6956	7024		9874	9495	9494	9675	9897	9541	9443	9827
		10315	10118	10136	10291	10063	10383	10421		11103	10502	10512	10861	10715	10517	10903		7278	6852	7022	7037	7046	6931	6932		9723	9634	9534	9775	10083	9535	9440	10014
		10356	10243	10076	10256	9994	10350	10368		11126	10620	10582	10573	10697	10436	10919		7203	6914	7131	6958	7122	6977	7050		9736	9446	9368	9500	9599	9312	9233	9933
		10294	10210	10035	10293	10020	10240	10329		11058	10711	10546	10705	10689	10436	10792		7187	6871	7096	6965	7003	6949	6892		9929	9510	9522	9391	9733	9224	9317	9822
		10306	10119	9956	10226	10066	10430	10226		11136	10608	10567	10666	10683	10461	10980		7126	6898	7095	7002	7040	6887	6918		9852	9710	9456	9666	9552	9418	9364	9888
		10274	10072	9989	10202	10120	10342	10155		10950	10550	10579	10651	10608	10439	10813		7321	6908	7047	7031	6956	6882	6947		9927	9526	9529	9600	9677	9523	9268	9705
		10283	10012	9907	10235	10040	10269	10388		11035	10595	10512	10696	10740	10295	10899		7275	6882	7038	6956	6975	6935	6898		9801	9325	9468	9394	9700	9325	9265	9868
		10194	10019	9839	10307	9938	10214	10285		11026	10497	10456	10528	10586	10358	10827		7023	6886	7101	6930	6963	6960	6905		9836	9376	9534	9469	9627	9310	9285	9781
		10303	10026	10001	10155	9926	10146	10231		10872	10531	10492	10567	10550	10288	10791		7152	6817	7100	7021	7003	6934	6938		9985	9535	9314	9315	9547	9353	9175	9858
		11663	11930	11618	12030	11563	12193	11523		12577	12753	12431	12640	12694	12567	13058		6839	6594	6858	6977	6922	6750	6700		9739	9323	9353	9487	9766	9417	9487	9776
		11666	11786	11489	11843	11450	12115	11834		12747	12511	12326	12516	12469	12471	12975		6922	6676	6845	6817	6792	6720	6729		9842	9311	9271	9451	9628	9248	9521	9994
		11729	11852	11438	11926	11561	12004	11536		12590	12484	12451	12500	12408	12507	12818		6893	6599	6777	6731	6772	6669	6597		9666	9456	9446	9394	9654	9167	9300	9953
		11711	11726	11397	11827	11479	11984	11758		12564	12581	12221	12444	12321	12346	12785		6778	6626	6697	6738	6790	6680	6618		9697	9535	9416	9490	9792	9305	9279	10006
		11662	11705	11339	11741	11454	11950	11626		12575	12325	12247	12310	12199	12311	12695		6770	6535	6614	6742	6802	6709	6619		9944	9602	9406	9393	9589	9319	9213	9869
		11600	11561	11348	11666	11395	11872	11576		12584	12277	12119	12242	12231	12248	12747		6675	6609	6778	6814	6886	6694	6688		9874	9437	9382	9471	9468	9381	9350	9843
		11500	11553	11342	11743	11322	11773	11635		12484	12346	12102	12324	12214	12266	12770		6880	6661	6798	6797	6907	6688	6647		9861	9542	9233	9364	9681	9274	9354	9806
		11643	11689	11365	11785	11243	11790	11558		12486	12262	12071	12507	12222	12217	12811		6806	6584	6689	6869	6781	6749	6618		9855	9522	9379	9485	9518	9529	9331	9682
		11609	11680	11385	11794	11412	11847	11611		12383	12330	12122	12343	12205	12306	12642		6846	6637	6734	6912	6806	6614	6662		9728	9423	9435	9415	9580	9250	9355	9842
		11591	11536	11305	11609	11425	11877	11485		12507	12339	12288	12455	12164	12169	12623		6911	6617	6731	6790	6738	6661	6658		9646	9499	9354	9427	9950	9564	9459	9841
		11677	11722	11286	11774	11296	11928	11571		12561	12415	12116	12259	12229	12156	12681		6798	6568	6714	6794	6813	6679	6666		9450	8425	8087	8324	8450	8204	8147	8343
		11551	11607	11427	11656	11304	11812	11546		12294	12294	12267	12375	12209	12260	12676		6652	6634	6703	6741	6737	6707	6661		9707	8247	8128	8102	8625	8217	7999	8244
		11664	11565	11306	11748	11201	11799	11512		12584	12179	12179	12330	12109	12195	12562		6894	6459	6596	6723	6732	6633	6578		9631	8216	8055	8167	8278	7954	8158	8297
		11486	11481	11330	11636	11287	11744	11525		12481	12209	12005	12368	12140	12085	12532		6924	6547	6637	6760	6763	6576	6539		9613	8032	8112	8090	8255	7851	8007	8222
		11577	11481	11218	11766	11206	11875	11560		12450	12227	12078	12162	12232	12079	12395		6747	6523	6662	6756	6701	6570	6526		9502	8029	7715	7979	7955	7903	7827	8092
		11458	11453	11260	11688	11232	11733	11460		12358	12243	12066	12219	12014	12024	12581		6873	6490	6635	6746	6713	6575	6562		9492	7875	7759	7790	7975	7758	7831	8039
		11420	11424	11098	11560	11341	11654	11510		12545	12230	12048	12315	11968	12154	12279		6884	6551	6632	6641	6726	6498	6467		9487	7921	7709	7762	7926	7658	7570	8071
		11395	11466	11085	11664	11271	11737	11536		12482	12137	12036	12231	12103	12003	12403		6774	6508	6600	6724	6676	6501	6461		9543	7792	7605	7601	7826	7608	7646	7870
		11452	11402	11141	11537	11274	11605	11353		12315	12165	11869	12038	12045	11890	12368		6696	6479	6552	6649	6642	6545	6534		9389	7606	7611	7559	7628	7586	7537	7912
		11442	11416	11111	11420	11288	11582	11460		12507	12139	12027	12061	11861	11939	12382		6728	6414	6558	6628	6740	6525	6567		9486	7670	7577	7682	7712	7567	7484	8022
		11528	10351	10147	10379	10070	10545	10233		12074	9957	10325	10544	10515	10296	10613		6561	4662	5330	5026	4948	4955	4814		9553	7681	7547	7588	7851	7553	7310	7784
		11336	10284	10044	10271	10018	10434	10156		12126	9760	10042	10275	10322	10086	10540		6648	4448	5213	4808	4766	4743	4629		9479	7461	7343	7619	7788	7378	7322	7865
		11278	10030	10030	10141	9922	9927	10111		12033	9602	9815	10120	10147	9808	10195		6556	4214	5033	4581	4623	4552	4459		9437	7596	7258	7445	7474	7358	7389	7666
		11394	9880	9907	10135	9849	9910	9950		11809	9479	9667	9898	9995	9673	10039		6537	4015	4896	4419	4398	4380	4323		9328	7461	7260	7279	7429	7179	7215	7671
		11302	9724	9827	10082	9698	9821	9952		12183	9270	9397	9617	9695	9454	9829		6693	3860	4822	4279	4305	4265	4174		9374	7306	7216	7405	7473	7271	7207	7737
		11251	9717	9712	9843	9540	9681	9768		12131	9060	9243	9476	9612	9241	9553		6681	3681	4680	4133	4113	4131	3987		9526	7235	7192	7233	7408	7295	7209	7606
		11295	9506	9659	9812	9458	9551	9800		12132	8929	9135	9381	9388	9256	9536		6536	3582	4572	4041	4042	4000	3914		9525	7287	7158	7176	7242	7068	7041	7399
		11171	9634	9566	9733	9403	9531	9589		12140	8846	9024	9274	9390	9070	9343		6527	3473	4600	3934	3887	3896	3771		9506	7117	7031	7172	7264	7054	7048	7472
		11286	9422	9561	9752	9374	9461	9513		11982	8696	8861	8937	9208	8919	9186		6636	3364	4413	3845	3810	3803	3643		9173	7058	7008	7184	7178	6998	6974	7370
		11041	9531	9451	9660	9304	9412	9406		12042	8603	8795	8914	8939	8758	9055		6599	3242	4346	3704	3716	3684	3604		9293	7127	6916	6987	7188	6956	6795	7333
		11089	9408	9360	9585	9191	9418	9394		11808	8396	8650	8729	8910	8633	8943		6478	3179	4261	3636	3601	3597	3527		9501	7026	6972	7097	6998	7022	6838	7166
		11184	9377	9285	9544	9129	9270	9385		12028	8305	8520	8668	8759	8501	8746		6672	3066	4152	3536	3473	3473	3406		9405	6890	6986	6970	7053	6699	6796	7278
		11129	9369	9216	9507	9052	9239	9267		12079	8200	8370	8462	8613	8391	8611		6597	2932	4130	3489	3387	3396	3336		9318	6898	6748	6806	6919	6816	6638	7338
		11056	9240	9178	9344	8918	9117	9199		12006	8104	8287	8469	8409	8229	8551		6570	2899	4008	3288	3316	3282	3191		9443	6863	6824	6807	6863	6793	6740	7023
		11190	9114	9102	9362	9055	9010	9109		12107	7835	8154	8291	8389	8121	8314		6527	2818	3923	3224	3214	3189	3083		9393	6915	6543	6781	6765	6681	6525	6890
		11171	9041	8991	9300	8911	8941	9105		12085	7730	7999	8230	8219	7971	8216		6519	2754	3866	3196	3124	3135	3036		9390	6763	6767	6813	6800	6638	6650	6922
		11126	8978	9008	9176	8724	8935	9098		12033	7567	7790	8089	8104	7893	8017		6523	2673	3818	3073	3047	3079	2950		9306	6679	6665	6597	6741	6504	6451	6962
		11140	8958	8984	9183	8721	8874	8874		12083	7393	7738	7941	7909	7745	7895		6453	2634	3720	3053	2990	2952	2877		9276	6597	6560	6733	6714	6559	6382	6784
		11170	8686	8787	9061	8596	8749	8901		11968	7374	7622	7814	7797	7691	7879		6582	2578	3702	2925	2924	2929	2862		9310	6571	6480	6414	6637	6446	6317	6795
		11143	8857	8805	9027	8525	8814	8834		12065	7347	7585	7666	7658	7499	7733		6329	2536	3718	2914	2885	2838	2772		9219	6569	6412	6560	6525	6282	6369	6692
		11012	8723	8715	8877	8465	8646	8721		12043	7250	7402	7584	7635	7342	7707		6395	2453	3591	2841	2807	2865	2720		9197	6498	6395	6545	6515	6437	6342	6633
		11014	8692	8542	8786	8341	8551	8719		12038	7074	7347	7426	7529	7240	7524		6448	2410	3540	2787	2735	2747	2655		9272	6553	6308	6431	6555	6313	6204	6516
		10978	8567	8503	8761	8314	8479	8650		11887	6973	7184	7364	7404	7131	7402		6474	2332	3474	2720	2704	2691	2598		9219	6613	6214	6422	6548	6341	6316	6571
		10992	8491	8471	8677	8172	8436	8556		12068	6859	7129	7228	7299	7088	7185		6356	2326	3454	2684	2657	2678	2555		9334	6434	6220	6332	6417	6279	6077	6641
		10901	8463	8378	8610	8178	8338	8625		11927	6730	7073	7064	7174	6998	7195		6484	2262	3375	2615	2638	2586	2491		9252	6311	6142	6226	6369	6203	6089	6455
		10892	8311	8265	8544	8135	8253	8341		11672	6763	6980	7040	7126	6910	7028		6490	2190	3372	2590	2569	2542	2484		9114	6224	6124	6238	6300	6228	5981	6451
		10892	8341	8323	8506	8066	8247	8418		12013	6566	6822	6977	7075	6766	6998		6353	2181	3303	2557	2523	2483	2433		9209	6296	6114	6246	6291	6065	5945	6283
		10860	8239	8193	8400	7963	8140	8335		12106	6546	6732	6892	6937	6653	6898		6428	2143	3307	2530	2498	2455	2394		9128	6144	6115	6272	6245	6129	5914	6356
		10943	8207	8082	8388	7906	8121	8237		11981	6446	6702	6786	6809	6629	6729		6416	2090	3255	2475	2456	2411	2357		9126	6122	6054	6171	6206	6050	6037	6341
		10876	8149	8081	8246	7829	7991	8172		11964	6419	6519	6637	6753	6483	6680		6394	2057	3141	2412	2425	2416	2304		9280	6170	6060	6125	6128	5985	5937	6247
		10815	8076	8006	8276	7853	7940	8156		11999	6293	6471	6655	6648	6465	6566		6343	2048	3186	2370	2383	2353	2292		9245	6036	5949	6058	6057	6002	5769	6191
		10809	8013	7954	8165	7702	7854	8105		11891	6172	6394	6536	6513	6299	6530		6324	2030	3136	2341	2297	2312	2200		9156	6134	5974	5969	6142	5907	5764	6146
		10862	7941	7944	8057	7662	7801	7910		11706	6154	6351	6456	6508	6243	6434		6392	2000	3086	2321	2320	2295	2199		9155	6012	5761	5957	6041	5863	5756	6170
		10903	7912	7928	8020	7605	7720	7923		11959	6081	6229	6289	6417	6240	6394		6324	1967	3098	2309	2288	2259	2197		9163	6015	5844	5928	5922	5823	5656	6046
		10786	7772	7815	7956	7574	7620	7873		11930	6011	6154	6216	6382	6082	6274		6318	1959	3045	2290	2254	2230	2138		9128	5888	5764	5947	5891	5800	5691	6135
		10762	7806	7730	7885	7465	7616	7825		11716	5887	6137	6209	6237	6033	6180		6390	1933	3016	2240	2234	2198	2120		9234	5955	5738	5671	5938	5803	5661	6073
		10708	7709	7706	7791	7509	7502	7700		11787	5879	6018	6087	6211	5961	6152		6265	1932	3032	2213	2182	2148	2084		9345	5930	5836	5773	5877	5779	5688	5990
		10819	7740	7672	7782	7428	7568	7746		11875	5760	5922	6065	6138	5976	6013		6235	1886	2989	2209	2169	2129	2067		9228	5895	5683	5742	5739	5669	5509	5968
		10833	7645	7593	7739	7391	7414	7621		11788	5702	5910	6007	5997	5795	6020		6437	1865	2946	2187	2153	2113	2003		9300	5806	5853	5680	5750	5610	5584	5856
		10772	7614	7569	7663	7337	7431	7533		11897	5697	5798	5958	5947	5808	5864		6327	1839	2953	2152	2120	2086	2001		9171	5682	5700	5800	5766	5597	5531	5909
		10714	7634	7489	7667	7278	7385	7532		11746	5636	5772	5882	5899	5663	5894		6217	1818	2908	2138	2070	2078	1998		9257	5813	5588	5664	5726	5648	5499	5765
		10849	7624	7499	7548	7193	7322	7466		12051	5566	5712	5814	5880	5617	5792		6337	1792	2918	2116	2065	2046	1960		9171	5692	5475	5594	5670	5540	5341	5772
		10860	7457	7422	7563	7153	7336	7458		12028	5457	5661	5762	5792	5558	5676		6405	1780	2877	2086	2035	2041	1941		9230	5760	5669	5635	5554	5488	5348	5853
		10724	7400	7393	7467	7131	7288	7354		11715	5378	5606	5629	5717	5446	5680		6266	1772	2858	2037	2006	2003	1929		9180	5632	5599	5470	5617	5362	5308	5706
		10731	7347	7342	7515	7088	7185	7426		11714	5322	5464	5605	5638	5439	5578		6408	1790	2838	2040	2011	2010	1894		9232	5650	5390	5535	5555	5366	5429	5831
		10660	7335	7333	7441	7027	7151	7304		11681	5338	5475	5551	5610	5353	5499		6273	1761	2817	2031	1999	1945	1872		9176	5483	5326	5492	5437	5493	5282	5666
		10730	7346	7270	7414	6980	7093	7286		11724	5275	5446	5489	5469	5324	5411		6290	1745	2808	2029	1939	1948	1850		9217	5468	5368	5484	5441	5397	5264	5638
		10683	7271	7145	7319	6889	7129	7159		11768	5175	5350	5449	5455	5251	5441		6385	1700	2779	1959	1946	1886	1856		9322	5572	5356	5406	5438	5381	5128	5742
		10692	7193	7168	7355	6908	7013	7110		11519	5185	5337	5398	5402	5205	5334		6334	1706	2715	1983	1949	1900	1820		8984	5456	5378	5333	5495	5337	5253	5559
		10765	7208	7100	7268	6871	6991	7064		11904	5128	5271	5299	5384	5170	5293		6292	1693	2727	1986	1901	1905	1785		9229	5449	5270	5442	5423	5266	5096	5557
		10735	7179	7110	7271	6886	6889	7005		11820	5051	5194	5240	5268	5130	5209		6361	1664	2721	1920	1894	1889	1774		8993	5395	5371	5389	5442	5281	5104	5602
		10766	7078	6994	7167	6694	6866	6964		11848	5021	5121	5206	5269	5032	5134		6269	1665	2692	1897	1921	1851	1779		9087	5342	5285	5270	5258	5264	5101	5489
		10652	7005	7055	7117	6710	6804	6952		11667	4944	5088	5177	5250	4994	5141		6206	1679	2769	1912	1858	1843	1739		9131	5362	5256	5186	5341	5243	5096	5531
		10627	7051	6936	7023	6671	6831	6930		11887	4914	5031	5160	5126	4932	5124		6399	1625	2708	1877	1846	1818	1717		8973	5300	5161	5283	5351	5243	5005	5421
		10596	7013	6896	6991	6595	6719	6873		11774	4893	5035	4999	5121	4898	5053		6182	1633	2653	1885	1819	1799	1743		9211	5270	5208	5172	5305	5190	5031	5399
		10574	6891	6899	6969	6649	6746	6894		11818	4860	4973	5053	5028	4878	4951		6220	1604	2664	1836	1824	1779	1737		9130	5187	5097	5075	5218	5087	4955	5447
		10692	6862	6792	6931	6549	6632	6763		11769	4809	4923	4989	5004	4788	4905		6243	1600	2656	1854	1834	1746	1697		9165	5210	5116	5155	5187	5135	4944	5429
		10722	6851	6788	6890	6457	6562	6707		11840	4745	4822	4905	4973	4781	4887		6370	1595	2608	1834	1809	1784	1696		9024	5176	5054	5134	5171	5136	4879	5386
		10745	6765	6808	6808	6486	6550	6755		11793	4763	4808	4833	4965	4710	4875		6271	1599	2606	1836	1811	1753	1704		9030	5147	5088	5034	5151	5090	4788	5317
		10615	6723	6719	6799	6445	6572	6600		11693	4705	4760	4735	4826	4702	4831		6364	1566	2628	1827	1761	1744	1652		9278	5129	5016	5096	5044	5002	4892	5271
		10593	6664	6628	6825	6410	6487	6637		11729	4612	4747	4748	4823	4594	4767		6318	1559	2581	1780	1767	1730	1674		9123	5040	5071	4989	5063	5040	4863	5219
		10593	6714	6627	6756	6335	6437	6588		11657	4607	4708	4675	4709	4595	4682		6215	1561	2563	1786	1735	1708	1633		9217	4951	5042	4960	5003	4979	4723	5243
		10615	6611	6564	6706	6383	6390	6558		11673	4492	4582	4643	4678	4548	4709		6247	1554	2550	1769	1725	1706	1609		9064	5028	4857	4969	4969	4950	4713	5284
		10710	6628	6587	6679	6311	6418	6502		11584	4461	4633	4703	4717	4519	4647		6302	1564	2530	1755	1739	1730	1605		9001	5051	4965	5015	4972	4876	4641	5103
		10671	6668	6491	6643	6287	6317	6483		11388	4489	4552	4580	4610	4459	4616		6296	1546	2550	1765	1712	1700	1606		9063	4988	4835	4920	4998	4842	4681	5162
		10595	6571	6453	6624	6221	6330	6410		11628	4386	4556	4592	4605	4454	4617		6185	1550	2543	1741	1694	1678	1598		9086	4933	4899	4882	4868	4774	4681	5128
		10636	6526	6501	6582	6198	6250	6385		11694	4358	4469	4527	4537	4391	4512		6341	1531	2508	1735	1719	1658	1578		8959	4901	4826	4856	4790	4817	4655	5067
		10656	6449	6421	6485	6100	6243	6440		11625	4303	4495	4458	4510	4367	4538		6352	1512	2524	1732	1691	1639	1589		8994	4942	4768	4849	4851	4798	4546	5058
		10581	6486	6392	6508	6187	6077	6359		11618	4324	4374	4458	4510	4342	4397		6164	1507	2483	1715	1694	1656	1571		8960	4883	4706	4777	4858	4645	4503	4961
		10559	6426	6278	6481	6147	6033	6258		11510	4268	4363	4447	4483	4249	4417		6272	1497	2506	1683	1661	1634	1570		9054	4804	4716	4841	4703	4664	4574	4985
		17190	3365	3144	3450	3413	3603	3553		13055	2183	2191	2205	2186	2206	2011		6048	485	1362	540	520	526	459		9898	926	670	673	464	460	404	450
		17120	3083	2910	3225	3209	3291	3239		13077	2009	1999	2067	2021	2032	1814		6089	494	1357	529	503	503	439		10103	772	541	557	405	417	351	393
		17460	2916	2725	3086	3157	3189	3190		13261	1927	1876	1993	1958	1883	1714		6118	490	1332	514	513	503	461		10199	631	493	494	378	383	315	368
		17497	2850	2627	2970	3080	3049	3052		13178	1831	1827	1938	1871	1807	1681		5971	486	1344	523	517	519	450		9901	551	424	451	334	330	294	334
		17570	2762	2513	2846	3027	2944	2832		13102	1787	1758	1833	1798	1715	1616		5931	494	1314	528	513	499	435		9928	491	399	409	333	314	289	313
		17512	2627	2468	2712	2916	2811	2659		13255	1700	1693	1717	1744	1640	1556		6055	482	1338	534	517	515	451		9913	454	363	386	294	292	259	292
		17239	2512	2394	2624	2787	2638	2569		13088	1641	1621	1654	1625	1570	1483		5861	487	1346	512	509	512	452		10133	423	335	360	273	276	269	282
		17351	2454	2309	2533	2603	2483	2480		13014	1583	1594	1584	1591	1518	1433		6020	488	1329	530	516	507	452		10164	408	315	334	264	274	249	269
		17348	2399	2229	2446	2554	2393	2398		12984	1515	1522	1558	1510	1489	1361		5980	499	1358	535	514	504	443		10303	371	303	314	260	260	244	273
		17183	2322	2182	2361	2463	2318	2312		13078	1478	1491	1507	1496	1440	1302		5964	493	1316	529	511	507	451		9993	353	283	300	248	254	226	263
		17355	2218	2137	2323	2378	2210	2261		13063	1463	1446	1492	1441	1379	1284		6109	494	1288	539	500	507	444		10032	341	271	295	239	243	231	250

## Sheet: Fig4E
Elen
lipid to protein ratio 50
Ca transport
NORMALIZED DATA
		Measurement at 380nm (free Fura-2) - REFERENCE SET									Measurement at 340nm (Ca bound Fura-2) - SET 1									Measurement at 340nm (Ca bound Fura-2) - SET 2									Measurement at 340nm (Ca bound Fura-2) - SET 3									Ratio 340/380 (%) - SET 1									Ratio 340/380 - SET 2
		Concentrations Ca (mM)
	Time norm	0	0.2	0.2	0.2	0.2	2	2	2		0	0.2	0.2	0.2	0.2	2	2	2		0	0.2	0.2	0.2	0.2	2	2	2		0	0.2	0.2	0.2	0.2	2	2	2		0	0.2	0.2	0.2	0.2	2	2	2		0	0.2	0.2
	-11.9839	120.278	143.946	166.953	180.788	135.498	187.624	197.354	314.615		91.8542	100.104	98.14	85.8365	89.2204	84.1105	82.5485	78.3143		94.034	70.7279	68.3736	69.3432	69.3721	65.4056	64.7624	64.3941		96.1488	95.7641	91.8943	92.9536	91.1095	93.1647	99.2216	92.3721		76.3684	69.5423	58.7831	47.479	65.8464	44.8294	41.8275	24.8921		78.1807	49.135	40.9539
	-11.616	108.611	151.121	151.073	191.133	176.623	174.752	202.116	250		98.4995	89.234	93.326	91.73	87.2955	73.7478	75.9003	86.216		94.9206	69.1307	68.3736	68.0965	68.1245	69.5165	65.5334	67.3141		97.445	93.6182	94.105	94.6956	89.6702	95.0377	97.2174	93.7116		90.69	59.048	61.7755	47.9928	49.4246	42.2013	37.5528	34.4864		87.3949	45.7453	45.2587
	-11.2486	96.6667	152.915	166.524	185.714	148.052	164.356	208.466	306.923		104.073	83.4369	94.0919	80.5133	87.6805	77.6339	80.7941	68.9201		91.1526	69.682	69.0974	67.7212	69.0904	67.4133	66.9363	67.0954		97.445	97.0703	92.11	97.0444	93.0406	101.834	92.878	92.8744		107.662	54.5643	56.5036	43.3533	59.2228	47.2351	38.7566	22.4552		94.2958	45.5692	41.494
	-10.8809	112.778	142.152	140.343	190.148	159.74	162.376	187.831	296.154		91.4255	82.9193	96.8271	87.8327	84.4081	76.3385	76.0849	79.8946		98.3192	70.0495	67.6908	68.7131	68.7148	66.0885	63.4353	67.6228		97.2572	94.1967	91.2473	95.9288	92.0204	93.0875	95.5244	94.1395		81.067	58.3312	68.993	46.1918	52.8408	47.0134	40.5072	26.9774		87.1796	49.2777	48.2323
	-10.5131	96.1111	132.287	136.91	155.665	143.29	152.97	173.016	256.154		98.0707	87.9917	88.7309	82.4144	86.718	71.3299	79.132	74.3635		93.4614	71.4488	68.2644	68.9142	67.333	67.4542	65.6092	65.3846		98.3092	93.7115	90.2768	95.0871	91.984	91.4848	96.3612	93.5442		102.039	66.5158	64.8097	52.9435	60.5192	46.6299	45.7369	29.0308		97.2431	54.0104	49.8608
	-10.1454	101.944	117.489	156.652	173.399	153.68	178.713	189.418	249.231		88.8532	83.9545	91.7943	83.4601	87.2955	77.7202	78.7627	70.5882		92.1315	69.2862	69.0427	69.6113	68.6477	67.9732	67.8337	66.8639		95.5288	95.5775	91.9842	93.9714	92.8038	94.8639	101.382	90.8465		87.1584	71.4574	58.5975	48.1318	56.8035	43.4889	41.5814	28.3224		90.3742	58.9726	44.0739
	-9.77767	100	135.426	137.768	183.251	145.887	185.149	169.312	269.231		91.2111	78.4679	84.6827	78.6122	77.9596	68.2211	69.9908	71.115		94.4034	70.2049	65.6835	67.7212	66.5549	66.4026	64.1304	64.6514		96.75	96.3986	89.0367	95.9679	90.5447	96.2927	95.1742	90.4372		91.2111	57.9415	61.4675	42.8986	53.4382	36.8467	41.3383	26.4141		94.4034	51.8401	47.6768
	-9.4097	102.778	154.709	137.339	151.232	127.273	173.762	183.069	247.692		94.2122	87.8882	87.4179	78.5171	81.3282	72.2798	81.8098	71.6418		90.6354	69.0318	68.7014	68.244	65.8975	64.5042	66.633	65.2045		97.3887	92.424	93.6736	99.4519	93.241	97.1809	97.6844	92.0558		91.6659	56.8089	63.6512	51.9185	63.9007	41.5969	44.688	28.9237		88.1858	44.6206	50.0232
	-9.04225	95.2778	138.117	123.605	160.099	136.797	162.376	177.778	243.077		85.209	84.9896	91.9037	78.1369	74.3022	70.8981	71.0988	75.2414		91.0048	67.5194	68.7969	67.9088	67.3866	67.6728	64.775	63.1207		95.5101	92.9091	91.5349	95.9092	89.7796	96.6403	94.8434	90.1767		89.4322	61.5347	74.3527	48.8055	54.3159	43.6629	39.9931	30.9538		95.5152	48.8858	55.6586
	-8.67428	111.111	129.148	143.348	189.655	140.26	162.871	189.418	274.615		94.2122	85.6108	94.4201	82.0342	76.8046	75.3886	71.0065	71.0272		93.2582	71.6184	69.3432	67.0643	68.9428	67.8776	64.9141	66.7739		95.1155	93.1704	90.7441	94.5782	92.1662	95.8293	94.999	91.107		84.791	66.2889	65.8679	43.2544	54.7588	46.2872	37.4867	25.8643		83.9324	55.4545	48.3741
	-8.30678	108.056	132.287	143.777	151.724	144.589	176.238	156.614	234.615		88.746	82.2981	86.5427	79.7529	74.9759	68.1347	70.0831	74.8025		95.8626	70.3463	67.4177	66.2332	66.5683	67.6045	64.8382	65.2688		96.1112	93.5436	91.0137	98.5124	92.0386	97.8953	97.1006	92.7256		82.13	62.2118	60.1924	52.5644	51.8546	38.6607	44.749	31.883		88.716	53.177	46.8905
	-7.93908	91.3889	143.498	124.893	158.621	146.753	160.396	187.831	254.615		88.9603	86.2319	91.0284	77.1863	76.7084	77.5475	74.1459	75.5926		92.778	70.4452	68.5238	67.5469	67.0915	65.4603	65.9378	64.6257		97.7456	90.6139	94.734	94.0889	90.9455	96.7368	95.4271	93.4884		97.3426	60.0928	72.8853	48.6609	52.2703	48.3475	39.4749	29.6889		101.52	49.0915	54.8662
	-7.57112	119.167	125.561	152.79	161.576	132.9	172.772	196.296	263.846		84.6731	81.1594	83.0416	74.3346	76.3234	71.3299	74.3306	68.3933		90.3214	68.9187	66.2843	67.2252	66.0987	67.7001	63.2331	65.1145		95.5101	92.424	94.3925	95.0284	91.0002	94.8446	99.0076	90.4558		71.0543	64.6377	54.3502	46.0059	57.429	41.2855	37.8665	25.9217		75.7942	54.8888	43.3827
	-7.2036	117.5	142.152	130.043	162.069	131.169	167.822	164.021	229.231		93.5691	80.7453	85.7768	79.5627	80.9432	71.7617	71.6528	71.4662		92.3162	68.1413	66.9944	68.3512	66.9037	68.1918	64.8003	63.4165		96.8815	94.9617	88.6592	96.8487	86.5367	97.4319	95.0379	91.6837		79.6333	56.8019	65.9604	49.0919	61.7092	42.7606	43.6851	31.1765		78.567	47.9354	51.5171
	-6.83563	109.167	135.426	150.215	183.744	137.662	169.307	150.794	270.769		96.0343	91.9255	88.1838	78.4221	76.0346	73.6615	77.6547	67.6032		91.6513	68.8339	67.0627	66.4611	66.8098	65.31	64.1052	65.7834		91.9594	94.5885	90.5643	93.5604	88.814	95.6555	93.9288	89.0977		87.9703	67.8787	58.7052	42.6801	55.2327	43.5077	51.4973	24.9671		83.9554	50.8277	44.6446
	-6.4682	107.222	149.327	128.755	166.995	138.528	167.822	159.788	252.308		97.7492	81.2629	84.7921	83.6502	75.8422	66.494	68.7904	73.1343		94.1633	71.3357	69.3432	67.6676	67.9769	65.9246	63.3215	64.3427		96.5433	97.1077	90.8519	97.3576	90.7816	96.0031	99.786	91.4047		91.1651	54.4193	65.8552	50.0914	54.7486	39.6218	43.0509	28.9862		87.8207	47.7713	53.8565
	-6.10048	117.778	145.74	145.923	162.562	135.931	175.248	175.132	253.077		90.9968	87.06	88.2932	74.8099	80.3657	74.0933	68.5134	68.9201		92.2608	69.9223	66.8715	65.9651	65.2401	65.1052	64.042	66.0535		96.5809	93.7862	90.0611	97.4359	90.8544	98.3588	95.7968	92.0744		77.2614	59.7366	60.5068	46.0194	59.1226	42.2792	39.1209	27.2329		78.3346	47.9774	45.8266
	-5.73275	111.389	136.771	155.365	157.635	161.039	157.921	159.788	262.308		90.2465	81.8841	84.5733	76.8061	86.718	68.3938	76.5466	64.8815		87.7355	68.7915	70.7224	67.3056	65.4816	65.4739	63.9282	66.3365		95.5852	94.5885	89.9712	93.6583	90.2715	95.8872	96.0887	91.5163		81.0193	59.8693	54.4353	48.7239	53.8491	43.3089	47.905	24.7349		78.765	50.2968	45.5202
	-5.36505	108.889	147.534	142.489	151.724	133.333	160.396	146.561	210		90.9968	82.9193	89.4967	80.4183	82.0019	68.5665	75.6233	64.8815		93.9416	69.1025	68.4556	66.2601	66.6756	63.6711	62.639	66.4523		95.6416	90.9871	90.4385	92.386	88.3039	96.5437	97.0617	88.9116		83.5685	56.2036	62.8094	53.0029	61.5014	42.7482	51.5985	30.8959		86.2729	46.8385	48.0426
	-4.21132	102.5	157.399	147.21	169.458	175.325	199.01	159.259	270.769		91.6399	91.0973	100.219	84.5057	88.8354	78.5838	78.024	71.9052		89.5826	71.2792	67.2812	65.6702	67.5342	64.2584	64.3327	66.5037		97.8584	93.4689	92.0381	96.3789	88.4496	94.3425	94.6098	89.4512		89.4048	57.8766	68.0787	49.8682	50.6691	39.4874	48.9918	26.5559		87.3976	45.2856	45.7041
	-3.88573	92.2222	147.534	128.326	175.862	148.918	156.931	180.952	267.692		99.7856	90.7867	93.326	82.8897	85.6593	74.0069	73.5919	72.7831		104.119	78.5583	74.3002	79.7319	77.5959	74.2966	72.6365	73.9259		103.1	101.605	95.9382	104.561	95.7734	100.386	102.296	104.335		108.201	61.5363	72.7256	47.1334	57.5212	47.159	40.6692	27.1891		112.9	53.2477	57.8994
	-3.51828	99.7222	139.462	156.223	185.222	166.667	167.327	165.079	247.692		102.036	84.058	91.7943	80.7034	79.7883	72.8843	76.1773	66.9008		104.95	79.1095	73.5081	73.8606	73.209	76.9735	72.2321	75.4438		103.757	102.762	95.3451	97.7491	98.0506	103.34	103.269	99.9814		102.321	60.2731	58.7584	43.5713	47.873	43.5581	46.1459	27.0096		105.242	56.7248	47.0533
	-3.15058	98.3333	160.09	135.193	168.966	162.338	153.465	179.365	243.846		92.3901	86.3354	91.9037	86.7871	84.3118	78.8428	75.5309	74.6269		104.359	75.8304	73.7812	75.4558	71.9748	74.7064	70.4626	71.1088		102.874	101.81	97.6995	101.977	95.7551	100.618	104.009	99.7767		93.9561	53.9294	67.9796	51.3638	51.9361	51.375	42.1102	30.6041		106.128	47.3674	54.5747
	-2.78287	100.833	149.776	137.768	171.921	148.485	168.812	169.312	286.154		87.0311	84.7826	91.7943	73.0038	87.0067	75.1295	69.6214	70.2371		107.573	78.8693	75.1468	76.6354	73.6517	71.5105	73.4454	72.1508		101.841	98.7498	95.7045	100.411	92.0751	105.484	102.666	97.5442		86.3118	56.6064	66.6295	42.4635	58.5964	44.5049	41.1202	24.5452		106.684	52.6582	54.5458
	-2.41515	89.7222	149.327	136.91	175.369	143.29	184.653	174.074	233.846		89.7106	85.1967	82.7133	84.4106	83.6381	69.2573	78.4857	72.6953		106.225	79.9717	74.2728	75.429	72.6187	76.9598	70.6901	72.8454		101.803	101.642	97.8073	101.488	96.5021	102.182	101.09	96.2977		99.9871	57.0536	60.4145	48.133	58.3698	37.5067	45.0875	31.0868		118.393	53.5546	54.2494
	-2.04745	91.3889	152.915	143.777	168.966	139.394	178.713	158.201	229.231		94.7481	94.824	94.0919	78.8973	92.974	72.3661	77.3777	63.7401		102.974	78.417	73.8632	75.5764	73.048	74.2557	71.4105	72.7811		104.058	102.165	96.2078	100.626	98.251	98.7063	101.926	97.414		103.676	62.011	65.443	46.6943	66.6987	40.493	48.911	27.8061		112.676	51.2815	51.3735
	-1.67972	140	150.673	136.052	172.906	155.411	190.594	186.772	244.615		86.4952	81.2629	95.4048	76.0456	81.0395	73.5751	73.2225	73.1343		105.541	78.3746	76.9766	74.9464	75.2214	72.6031	71.8782	73.6686		102.405	99.1043	93.422	102.251	96.994	99.9421	103.989	93.5256		61.7823	53.9334	70.124	43.9808	52.1452	38.6031	39.2041	29.8977		75.3866	52.0164	56.5791
	-0.325517	97.7778	109.417	106.867	88.67	72.7273	110.891	96.2963	144.615		90.2465	89.0269	111.926	96.0076	94.129	92.228	100.092	100.351		105.153	80.6502	73.8222	74.008	73.6517	73.8596	70.5005	73.8873		100.601	102.612	97.6456	100.215	94.0791	98.2622	104.982	96.6884		92.2976	81.3648	104.734	108.275	129.427	83.1699	103.942	69.3918		107.543	73.709	69.0786
	0	100	100	100	100	100	100	100	100		100	100	100	100	100	100	100	100		100	100	100	100	100	100	100	100		100	100	100	100	100	100	100	100		100	100	100	100	100	100	100	100		100	100	100
	0.3677	89.1667	112.556	80.6867	105.911	72.2944	92.0792	96.2963	109.231		93.462	98.2402	119.147	107.414	94.129	94.7323	106.741	88.1475		116.31	100.155	98.0609	99.4102	101.61	99.1396	96.5369	95.7294		111.704	113.771	112.545	123.645	112.48	122.668	122.767	116.93		104.817	87.2811	147.666	101.419	130.202	102.881	110.846	80.6984		130.441	88.9828	121.533
	0.735417	96.9444	99.1031	78.97	88.67	86.5801	78.7129	100.529	123.077		92.8189	100.414	118.381	97.6236	99.3263	94.3869	98.7073	97.8051		116.365	102.36	100.901	101.434	96.9412	101.83	99.5324	99.5369		111.422	116.85	112.563	121.296	112.971	121.877	122.631	111.256		95.7444	101.323	149.906	110.098	114.722	119.913	98.1878	79.4666		120.033	103.287	127.772
	1.1034	107.5	101.794	88.8412	92.1182	64.9351	82.6733	76.1905	115.385		81.4577	104.762	115.974	104.658	98.845	98.1865	98.7073	93.0641		116.31	101.781	100.669	101.689	103.542	100.847	101.567	99.2411		110.896	113.473	107.98	123.018	110.712	119.135	121.814	111.405		75.7746	102.916	130.54	113.612	152.221	118.765	129.553	80.6555		108.195	99.9874	113.314
	1.47083	86.6667	101.794	86.2661	103.941	88.7446	88.1188	78.836	106.154		86.7095	101.449	114.114	107.51	99.4225	93.0915	95.6602	99.2976		119.653	100.636	97.1869	97.5737	97.9877	103.551	101.782	103.563		108.848	112.26	113.677	117.009	109.947	120.641	121.366	113.433		100.049	99.6616	132.281	103.433	112.032	105.643	121.341	93.5412		138.061	98.8627	112.659
	1.83855	101.111	91.0314	101.288	99.0148	82.684	94.5545	96.2963	107.692		96.9989	102.277	109.628	91.635	99.0375	102.418	106.556	95.9614		121.352	101.3	100.751	101.957	100.174	100.628	100.379	100.605		110.013	116.458	106.47	119.945	104.5	124.194	118.544	117.023		95.933	112.354	108.234	92.5468	119.778	108.316	110.654	89.107		120.019	111.281	99.4703
	2.20625	113.889	111.659	96.9957	105.911	70.5628	108.416	76.1905	97.6923		87.9957	101.242	115.098	101.141	96.9201	90.3282	101.939	92.5373		115.719	102.375	99.4811	100.63	98.1352	101.175	101.908	102.251		110.483	114.032	112.761	123.547	106.741	122.263	127.068	110.865		77.2645	90.6708	118.663	95.4956	137.353	83.3164	133.795	94.7232		101.606	91.6848	102.562
	2.574	105.833	83.4081	87.5536	90.6404	72.2944	77.2277	78.3069	106.154		99.4641	97.9296	106.893	102.567	102.117	102.332	102.678	102.371		118.951	102.926	95.3298	101.005	99.9732	101.338	99.4565	99.6141		110.934	114.032	106.955	120.258	109	121.298	121.541	112.93		93.9818	117.41	122.088	113.158	141.252	132.506	131.122	96.436		112.395	123.4	108.882
	2.94172	87.5	97.7578	81.5451	96.5517	80.5195	84.1584	75.6614	98.4615		93.3548	96.9979	110.394	104.183	100.77	98.7047	105.54	96.5759		114.758	101.004	97.8834	101.072	100.054	101.311	99.1153	106.149		113.413	116.682	109.867	116.246	105.775	117.725	119.946	116.298		106.691	99.2227	135.378	107.903	125.15	117.284	139.49	98.0849		131.152	103.32	120.036
	3.30942	97.5	94.6188	86.6953	100.493	61.4719	82.6733	68.7831	104.615		90.0322	102.692	108.862	101.426	104.042	98.1865	105.91	96.2248		112.671	101.343	98.9485	98.941	97.223	99.1123	101.453	105.904		108.679	115.637	111.377	117.89	107.797	120.409	117.786	114.847		92.3407	108.532	125.569	100.929	169.252	118.765	153.976	91.9795		115.56	107.106	114.134
	3.67715	101.111	79.3722	96.9957	92.1182	71.8615	82.1782	86.2434	85.3846		94.4266	105.383	112.91	97.1483	99.615	101.9	100.277	101.668		114.961	99.9859	96.5451	98.6327	98.417	101.106	99.3049	103.769		104.49	115.917	107.836	113.584	107.251	117.262	119.031	112.67		93.3889	132.771	116.408	105.46	138.621	123.999	116.272	119.071		113.698	125.971	99.5355
	4.04485	101.944	95.0673	83.691	99.0148	73.5931	68.3168	77.2487	101.538		89.7106	105.59	110.941	101.236	99.1338	99.6546	99.5383	99.4732		113.262	104.028	99.8771	95.7909	98.1218	98.525	98.7614	101.839		110.896	111.887	110.873	116.109	106.304	114.404	118.019	114.921		87.9995	111.069	132.56	102.243	134.705	145.871	128.854	97.9661		111.102	109.426	119.34
	4.41282	104.722	95.9641	79.8283	99.0148	65.368	73.7624	69.3122	84.6154		89.6034	103.106	116.083	108.365	105.101	101.295	97.1376	92.1861		114.463	101.131	96.6544	97.7614	101.274	101.926	104.474	107.178		108.623	115.077	113.102	119.906	106.431	114.655	120.88	111.516		85.563	107.442	145.416	109.443	160.784	137.327	140.145	108.947		109.301	105.384	121.078
	4.7803	97.5	100.448	76.824	89.1626	78.355	76.7327	71.9577	78.4615		85.3162	105.694	119.365	107.129	100.577	94.9914	96.9529	99.6488		113.391	102.318	100.642	99.0617	97.1961	101.256	98.6223	101.415		109.938	112.894	111.467	118.947	106.103	116.49	119.907	112.688		87.5038	105.222	155.375	120.151	128.361	123.795	134.736	127.003		116.299	101.861	131.003
	5.148	80.8333	86.5471	93.5622	91.6256	62.7706	87.6238	74.0741	86.1538		85.1018	94.7205	109.081	97.4335	97.7863	98.8774	95.6602	97.4539		115.94	99.7456	98.5252	99.933	96.9547	101.584	99.4692	100.669		107.984	114.499	106.902	114.993	108.563	123.093	119.167	109.247		105.281	109.444	116.587	106.339	155.784	112.843	129.141	113.116		143.431	115.25	105.304
	5.51598	99.4444	87.4439	84.5494	91.6256	77.9221	87.1287	78.3069	92.3077		98.9282	105.901	115.208	104.563	95.8614	95.0777	102.493	93.6787		110.048	102.898	97.1187	99.4772	96.5924	99.4947	97.4343	104.232		108.679	112.073	110.119	119.671	110.111	120.602	117.455	113.116		99.4809	121.107	136.261	114.12	123.022	109.123	130.886	101.485		110.663	117.673	114.866
	5.88342	83.0556	82.9596	90.9871	104.433	72.2944	87.1287	76.7196	91.5385		92.0686	101.346	119.037	100.285	101.829	96.9775	97.1376	100.176		113.059	99.9435	95.7531	97.3458	101.583	97.2685	100.215	107.023		107.195	113.995	110.658	120.454	107.561	115.775	120.918	113.395		110.852	122.163	130.829	96.0278	140.853	111.304	126.614	109.436		136.124	120.472	105.238
	6.25113	102.5	90.583	60.515	82.7586	76.1905	79.703	74.6032	87.6923		87.1383	100.311	116.521	102.662	97.8826	100.432	106.002	97.4539		109.882	101.145	98.1701	98.874	96.8339	98.8937	100.771	103.846		110.126	113.603	111.305	117.068	107.451	117.648	123.292	112.986		85.0129	110.739	192.549	124.049	128.471	126.008	142.088	111.132		107.202	111.66	162.224
	6.61885	108.056	84.3049	86.2661	89.1626	70.1299	61.3861	76.7196	92.3077		89.2819	106.625	109.847	102.471	102.791	94.3005	100.554	101.58		110.103	102.276	101.297	101.059	100.51	99.7405	98.5971	104.798		112.606	113.566	104.745	115.482	108.963	117.571	120.101	111.293		82.6259	126.476	127.335	114.927	146.573	153.619	131.067	110.045		101.895	121.316	117.424
	6.98658	101.667	100.897	74.6781	94.0887	70.1299	90.099	49.7354	116.154		91.3183	99.793	106.346	109.411	95.1877	90.2418	94.0905	89.7278		113.816	103.237	96.6407	97.2654	98.4304	100.874	96.7644	103.73		108.322	111.159	107.171	114.523	105.52	119.521	119.848	112.391		89.8213	98.9059	142.405	116.285	135.731	100.158	189.182	77.2491		111.95	102.319	129.41
	7.35432	93.8889	93.722	97.4249	85.7143	78.355	68.3168	76.7196	90.7692		82.5295	98.1366	110.722	103.042	98.4601	94.3005	100.185	94.1176		111.341	100.141	95.876	97.1582	99.2353	99.0167	100.152	105.48		109.919	114.294	111.179	115.678	112.534	116.277	118.778	111.237		87.9012	104.71	113.649	120.215	125.659	138.034	130.586	103.689		118.588	106.849	98.4102
	7.7223	94.7222	95.9641	78.97	97.0443	59.7403	82.6733	53.4392	99.2308		83.2797	102.899	111.597	101.331	100.096	101.641	103.601	106.936		112.043	100.763	95.8214	98.1501	98.5645	98.5796	100.126	103.177		106.463	110.114	104.134	114.66	105.848	117.783	121.502	114.326		87.92	107.226	141.316	104.417	167.552	122.943	193.867	107.765		118.286	105.001	121.339
	8.08973	84.1667	96.861	78.1116	87.1921	61.4719	73.2673	55.5556	86.9231		91.104	106.832	111.488	102.947	90.5679	92.228	100.739	102.722		111.803	102.516	96.2311	97.4665	97.8803	99.3444	100.392	104.682		109.356	114.965	107.566	119.28	108.344	118.556	119.712	113.395		108.242	110.294	142.729	118.069	147.332	125.879	181.33	118.175		132.835	105.838	123.197
	8.45745	105	82.9596	79.3991	85.2217	66.2338	69.3069	56.6138	90.7692		93.8907	99.3789	108.862	108.65	94.3215	92.8325	99.9077	103.336		114.74	100.014	97.4191	98.244	95.3448	104.903	97.6365	101.479		107.74	112.073	105.841	114.523	108.818	116.393	119.245	111.981		89.4197	119.792	137.107	127.491	142.407	133.944	176.472	113.845		109.276	120.558	122.695
	8.82515	84.1667	74.8879	74.2489	73.8916	46.7532	64.3564	88.8889	79.2308		94.7481	99.1718	113.895	105.323	103.176	100.259	96.2142	96.7515		113.447	104	96.8592	99.2895	98.9804	99.1669	100.872	100.296		108.135	108.64	108.807	116.05	107.579	117.281	121.152	111.553		112.572	132.427	153.396	142.537	220.682	155.787	108.241	122.114		134.788	138.874	130.452
	9.19312	81.1111	94.6188	85.4077	97.5369	61.039	74.2574	72.4868	112.308		88.1029	108.282	111.707	108.935	104.139	94.9914	98.1533	88.6743		112.024	102.346	97.4601	98.6461	100.241	99.0849	97.4343	101.904		109.713	113.118	110.784	119.593	107.816	116.895	119.401	115.237		108.62	114.44	130.792	111.686	170.61	127.922	135.409	78.9565		138.112	108.167	114.112
	9.56082	93.6111	84.7534	83.2618	90.6404	74.4589	80.198	64.5503	80		90.0322	105.487	116.958	107.224	95.2839	106.218	95.1062	97.0149		118.655	101.046	98.7847	99.9062	99.2219	101.707	99.6587	105.943		107.327	114.779	106.308	117.362	109.109	115.466	117.28	115.349		96.1768	124.463	140.471	118.296	127.969	132.444	147.337	121.269		126.753	119.224	118.643
	9.92827	92.7778	79.3722	93.133	75.3695	68.8312	69.3069	69.8413	83.0769		89.0675	106.211	106.018	99.8099	97.0164	106.045	94.8292	90.3424		113.853	101.399	95.3571	99.0617	100.389	103.537	99.8483	104.271		109.055	112.857	107.351	114.954	108.526	117.339	122.962	112.633		96.0009	133.814	113.834	132.427	140.948	153.008	135.778	108.745		122.716	127.752	102.388
	10.296	92.5	98.6547	76.3948	93.1034	67.5325	71.7822	66.1376	86.1538		92.8189	102.692	111.269	101.046	95.9577	91.6235	105.54	98.5953		111.544	97.0883	99.6996	97.3592	101.435	105.996	99.3049	102.277		111.46	111.588	106.937	118.751	108.435	116.857	119.245	114.791		100.345	104.092	145.65	108.53	142.091	127.641	159.577	114.441		120.588	98.4123	130.506
	10.664	91.1111	87.8924	84.5494	81.7734	72.7273	50.9901	69.8413	76.9231		87.9957	105.797	110.832	105.513	101.54	98.4456	102.585	93.8543		113.761	103.18	97.7059	98.4584	99.8524	97.9377	99.6461	101.518		105.561	111.289	107.441	119.612	111.587	115.08	115.762	113.209		96.5807	120.371	131.085	129.031	139.617	193.068	146.884	122.011		124.859	117.394	115.561
	11.0317	95.8333	100	81.9742	94.5813	67.0996	60.8911	59.2593	80		84.8875	101.035	115.864	102.662	106.352	94.4732	99.5383	99.3854		110.344	100.693	96.1901	101.126	96.8071	101.461	98.5844	103.615		109.75	115.32	104.529	115.052	105.447	118.614	118.817	111.591		88.5782	101.035	141.342	108.543	158.499	155.151	167.971	124.232		115.141	100.693	117.342
	11.3991	86.9444	95.0673	84.5494	91.6256	70.1299	73.2673	61.9048	86.1538		89.0675	97.3085	106.127	105.418	98.7488	101.468	100.369	103.424		113.373	99.8869	94.3875	99.8525	100.134	101.721	99.4944	106.83		108.172	108.845	106.614	117.264	107.233	118.614	118.72	113.86		102.442	102.358	125.521	115.053	140.808	138.49	162.135	120.046		130.397	105.07	111.636
	11.7668	87.2222	85.6502	76.824	74.3842	52.381	79.2079	51.3228	104.615		79.314	105.797	109.847	101.616	100.577	93.9551	98.0609	96.9271		112.819	99.2085	96.1901	97.118	99.8524	103.223	97.6491	106.921		105.955	112.484	106.003	116.5	105.739	119.019	116.268	109.581		90.9333	123.522	142.985	136.61	192.012	118.618	191.067	92.6509		129.346	115.83	125.208
	12.1345	94.7222	97.3094	75.9657	91.6256	66.2338	72.2772	74.0741	91.5385		82.7438	104.865	111.926	101.996	97.9788	98.9637	95.8449	93.8543		113.003	103.633	98.0199	96.622	101.784	103.401	100.885	107.872		105.861	110.86	104.835	116.207	105.338	116.741	113.738	110.419		87.3542	107.765	147.337	111.318	147.929	136.922	129.391	102.53		119.3	106.498	129.032
	12.5025	95.5556	85.6502	92.7039	82.7586	67.9654	62.3762	71.9577	88.4615		93.9979	109.627	109.519	102.947	103.369	101.468	104.34	96.6637		114.407	100.396	96.668	100.871	97.7328	101.311	102.894	103.319		105.486	112.782	106.614	113.486	104.227	113.42	116.637	110.214		98.3698	127.994	118.138	124.394	152.09	162.671	145.002	109.272		119.728	117.216	104.276
	12.87	126.111	92.3767	78.97	80.7882	74.8918	72.7723	76.1905	103.846		88.746	101.76	116.521	108.08	104.235	99.1364	94.1828	95.8736		114.259	105.102	96.9275	99.1421	102.093	100.792	100.594	105.132		107.402	110.748	108.573	113.623	106.285	116.625	117.163	114.14		70.3713	110.157	147.551	133.782	139.181	136.228	123.615	92.3227		90.6021	113.776	122.74
	13.2377	97.7778	91.9283	71.6738	67.9803	74.8918	72.2772	63.4921	69.2308		95.4984	99.6894	103.939	105.133	102.31	98.4456	101.2	104.39		111.286	103.35	96.6817	97.5871	95.8277	101.926	100.013	105.711		107.308	109.125	101.096	116.892	105.21	115.408	119.712	110.084		97.6688	108.443	145.016	154.652	136.61	136.206	159.391	150.785		113.815	112.424	134.891
	13.6057	82.2222	66.8161	81.9742	69.4581	65.368	71.7822	54.4974	98.4615		82.3151	99.1718	110.613	105.608	106.449	105.527	96.2142	97.4539		108.072	99.5194	96.668	99.0617	96.2973	101.748	98.9636	104.682		111.084	112.558	108.178	111.685	108.362	113.458	116.443	114.047		100.113	148.425	134.936	152.046	162.845	147.01	176.548	98.9766		131.439	148.945	117.925
	13.9733	93.6111	93.2735	65.2361	90.6404	64.5022	71.2871	48.1481	93.8462		87.7814	96.9979	113.348	101.046	104.62	90.2418	105.448	98.5075		114.961	103.279	101.338	100.214	97.223	101.639	98.5844	103.949		105.861	110.748	107.225	116.931	107.579	115.138	117.669	113.228		93.7724	103.993	173.75	111.48	162.196	126.589	219.007	104.967		122.807	110.727	155.341
	14.3411	98.8889	104.484	73.8197	82.7586	74.8918	68.8119	64.5503	81.5385		85.8521	104.037	110.066	105.323	99.615	101.295	100.369	97.1905		112.301	102.233	95.9443	99.8794	98.7523	103.414	98.6729	105.441		106.237	111.065	103.181	111.118	103.99	117.32	117.26	115.46		86.8167	99.5721	149.101	127.266	133.012	147.206	155.49	119.196		113.563	97.8455	129.971
	14.7088	76.9444	87.8924	85.8369	87.1921	60.6061	72.2772	61.3757	98.4615		91.3183	108.696	111.707	107.129	103.465	100	99.6307	93.4153		112.56	101.484	98.3204	99.5442	99.2353	100.86	95.5763	104.502		106.951	111.01	106.884	112.664	103.644	115.35	117.396	112.781		118.681	123.669	130.138	122.866	170.717	138.356	162.329	94.8749		146.287	115.464	114.543
	15.0765	94.4444	90.1345	75.1073	83.7438	78.7879	65.3465	65.0794	95.3846		91.3183	103.623	118.6	104.278	96.1501	99.3955	107.387	104.214		112.412	100.961	97.6785	99.4504	95.5326	100.697	100.657	108.207		106.012	112.166	107.908	112.958	105.21	120.834	115.859	113.116		96.69	114.965	157.907	124.52	122.037	152.105	165.009	109.257		119.025	112.012	130.052
	15.444	95.8333	93.2735	81.1159	73.399	60.1732	76.2376	69.8413	99.2308		84.7803	101.449	105.142	104.658	111.646	101.986	102.77	94.2054		114.407	103.788	95.2478	98.1501	98.7523	99.481	97.6365	107.023		106.369	111.681	106.237	112.449	105.083	111.218	116.832	113.805		88.4664	108.765	129.62	142.587	185.541	133.774	147.148	94.9357		119.381	111.273	117.422
	15.812	85.5556	90.583	84.9785	93.1034	72.7273	71.2871	61.3757	91.5385		88.5316	102.07	110.284	105.608	101.251	95.7686	95.2909	93.5031		113.17	101.004	98.1292	101.917	99.8793	100.205	102.01	105.338		105.58	113.398	102.714	109.982	105.119	111.199	116.17	111.126		103.479	112.682	129.779	113.431	139.22	134.342	155.258	102.146		132.276	111.504	115.475
	16.1794	85	87.8924	83.691	95.0739	59.7403	65.8416	63.4921	101.538		88.746	96.2733	111.488	101.996	104.812	98.7047	101.477	98.2441		116.347	97.4558	97.3235	98.6863	98.8597	99.9727	99.0142	104.348		104.847	110.692	105.841	114.269	105.721	114.868	112.084	110.102		104.407	109.535	133.214	107.281	175.447	149.912	159.827	96.7555		136.878	110.881	116.289
	16.5471	93.6111	90.1345	83.2618	78.3251	53.6797	68.8119	66.1376	81.5385		86.388	99.5859	113.457	94.7719	103.08	96.6321	97.3223	94.4688		110.233	100.283	95.9443	97.815	96.029	103.1	97.1309	104.759		103.551	107.24	107.207	116.089	106.176	114.539	114.011	111.684		92.2839	110.486	136.266	120.998	192.028	140.429	147.151	115.858		117.756	111.259	115.232
	16.9151	111.944	84.7534	70.3863	84.7291	73.1602	72.2772	67.1958	80.7692		80.7074	97.205	113.129	98.6692	106.256	98.1865	95.9372	93.5909		113.354	99.6184	93.2678	98.7936	96.74	101.748	99.0268	104.309		104.565	105.523	104.565	112.918	105.903	116.567	117.143	113.823		72.0959	114.692	160.726	116.453	145.238	135.847	142.773	115.874		101.259	117.539	132.509
	17.2825	101.389	83.4081	81.9742	78.3251	67.5325	66.8317	59.7884	100.769		89.0675	98.1366	114.661	101.236	104.427	100.95	97.1376	101.317		111.747	101.724	96.7227	99.7721	102.24	99.3581	99.368	104.168		103.588	110.095	109.633	111.685	103.68	114.482	117.533	109.842		87.8474	117.658	139.874	129.251	154.633	151.051	162.469	100.544		110.217	121.96	117.992
	17.6502	96.3889	79.3722	72.9614	87.1921	64.0693	68.8119	72.4868	77.6923		84.9946	104.658	117.943	99.1445	96.6314	102.936	106.648	93.3275		111.212	98.417	97.0777	95.9115	98.3096	99.0303	99.9115	102.547		103.926	109.237	104.817	114.758	105.265	112.744	114.789	114.419		88.1789	131.858	161.651	113.708	150.823	149.591	147.128	120.124		115.378	123.994	133.054
	18.0179	83.0556	84.3049	86.2661	85.2217	70.5628	74.2574	63.4921	78.4615		86.9239	101.449	115.208	108.365	107.122	98.2729	101.939	94.4688		116.328	98.6855	98.3067	100.657	99.0877	99.4947	102.452	103.666		106.068	107.875	106.254	111.861	106.121	113.265	114.925	112.335		104.658	120.336	133.549	127.157	151.811	132.341	160.554	120.401		140.061	117.058	113.958
	18.3857	78.8889	86.9955	69.5279	81.7734	64.9351	70.297	59.7884	90.7692		82.7438	97.412	109.409	110.076	109.432	95.9413	98.2456	96.3126		112.893	102.516	97.4191	99.1153	99.9061	101.789	98.2432	107.834		103.814	109.405	104.475	115.345	106.267	110.639	115.392	111.665		104.887	111.974	157.36	134.611	168.526	136.48	164.322	106.107		143.103	117.84	140.115
	18.7534	84.1667	91.0314	83.691	81.7734	62.3377	63.3663	60.3175	84.6154		81.672	96.3768	117.505	103.232	94.129	96.8912	101.2	93.6787		112.56	97.8799	96.5588	98.2306	94.1642	100.382	98.9636	101.981		106.538	111.551	107.782	114.934	105.484	110.176	115.236	114.009		97.0361	105.872	140.404	126.241	150.999	152.906	167.78	110.711		133.735	107.523	115.375
	19.1214	89.7222	99.1031	69.0987	82.7586	64.0693	72.7723	54.4974	80		87.0311	88.1988	103.501	100.475	99.8075	93.2642	87.9963	95.5224		113.04	103.152	98.4842	101.086	96.5119	103.414	97.8261	104.528		107.965	109.255	103.72	111.078	105.283	116.007	115.684	110.53		97.0006	88.9969	149.787	121.408	155.781	128.159	161.469	119.403		125.989	104.085	142.527
	19.4888	106.111	70.852	63.9485	73.399	56.2771	74.2574	75.1323	80		87.0311	97.8261	115.646	98.384	110.202	96.7185	99.446	97.8051		111.045	100.254	98.1975	98.6997	96.3778	98.7845	99.406	102.791		103.908	110.599	104.188	116.422	105.046	111.411	113.66	108.986		82.0188	138.071	180.842	134.04	195.821	130.248	132.361	122.256		104.65	141.498	153.557
	19.8568	85	82.9596	74.2489	75.8621	61.4719	70.7921	52.381	90.7692		86.9239	98.1366	109.737	103.612	97.0164	97.6684	96.8606	100.351		108.7	102.926	98.1019	100.657	100.054	101.325	100.025	101.441		105.185	107.875	107.998	113.486	106.34	114.173	114.983	106.679		102.263	118.294	147.797	136.58	157.822	137.965	184.916	110.556		127.882	124.067	132.126
	20.2245	83.3333	93.722	87.1245	80.2956	70.5628	62.3762	65.6085	113.846		81.0289	96.5839	103.282	101.236	112.32	92.3143	103.97	99.2098		109.642	100.735	97.6649	97.7078	97.7596	101.202	99.7093	105.094		105.429	109.759	104.835	113.975	104.482	113.632	112.648	111.2		97.2347	103.054	118.546	126.079	159.177	147.996	158.471	87.1438		131.57	107.483	112.098
	20.5919	84.1667	84.7534	78.97	89.1626	76.6234	55.9406	68.254	83.0769		91.104	102.277	111.488	101.806	100	94.0415	98.9843	96.137		108.219	102.12	100.314	97.3995	99.0072	102.322	96.9034	106.663		104.171	109.685	104.224	112.84	105.575	116.509	112.337	111.107		108.242	120.677	141.178	114.18	130.508	168.109	145.024	115.72		128.578	120.491	127.028
	20.9599	89.4444	75.3363	77.6824	73.399	64.0693	63.8614	73.545	96.9231		88.2101	96.6874	109.628	104.658	103.465	91.2781	98.2456	102.195		108.792	101.258	95.9853	98.874	96.0021	96.7359	97.1815	102.47		104.997	108.882	105.5	112.997	102.223	113.786	114.497	109.06		98.62	128.341	141.123	142.587	161.489	142.932	133.586	105.439		121.631	134.408	123.561
	21.3276	95.8333	73.991	75.5365	76.3547	44.5887	60.396	69.3122	96.9231		87.0311	101.863	107.221	104.848	103.561	93.0052	101.754	87.8841		108.737	99.7739	98.8802	99.0483	100.013	98.1289	97.7882	105.017		104.64	108.061	106.506	112.625	107.852	108.766	111.384	107.87		90.815	137.67	141.946	137.317	232.258	153.992	146.806	90.6741		113.464	134.846	130.904
	21.6951	95.2778	78.0269	73.8197	71.4286	66.2338	62.8713	70.8995	86.1538		84.7803	94.7205	119.475	105.608	98.6526	102.591	102.124	95.1712		113.465	102.233	97.9926	96.2601	100.738	101.297	100.847	105.377		107.214	110.804	104.96	112.546	104.117	112.087	112.376	107.777		88.9822	121.395	161.847	147.852	148.946	163.176	144.04	110.467		119.089	131.023	132.746
	22.0631	96.3889	76.2332	72.103	93.5961	57.5758	61.3861	53.9683	101.538		87.9957	100.828	106.018	104.278	102.406	97.7547	103.232	99.8244		114.167	102.516	101.243	99.5576	96.901	97.8011	99.7725	106.586		103.532	106.027	103.72	110.609	106.03	114.231	115.353	109.972		91.2924	132.263	147.036	111.412	177.863	159.246	191.282	98.3119		118.444	134.477	140.414
	22.4308	94.7222	82.0628	83.2618	81.7734	64.9351	66.8317	59.7884	74.6154		86.388	99.3789	106.783	97.9087	100.385	102.245	97.2299	93.5909		112.024	100.212	96.8182	98.8472	95.4521	100.738	101.946	106.329		107.571	107.184	104.062	113.016	103.735	114.173	111.247	109.116		91.2014	121.101	128.25	119.732	154.593	152.989	162.623	125.431		118.266	122.116	116.282
	22.7985	89.1667	98.6547	66.9528	88.1773	65.8009	73.7624	59.7884	90.7692		91.104	103.52	107.768	95.6274	102.31	103.627	98.892	99.7366		110.972	102.261	101.106	99.0885	98.6182	99.4947	98.774	105.981		104.058	106.923	108.321	109.219	104.992	115.293	116.112	110.66		102.173	104.931	160.961	108.449	155.484	140.488	165.403	109.879		124.454	103.656	151.011
	23.1659	92.2222	90.1345	83.2618	84.7291	50.6494	70.297	68.7831	94.6154		86.4952	99.6894	103.173	101.996	110.202	99.6546	102.77	102.107		110.417	98.318	95.917	95.7775	99.6109	102.404	98.3443	103.306		109.393	109.629	102.57	109.963	100.31	116.779	115.022	111.833		93.79	110.601	123.914	120.379	217.579	141.762	149.412	107.918		119.73	109.079	115.199
	23.5337	91.9444	82.9596	74.6781	62.5616	62.3377	52.4752	63.4921	121.538		90.0322	98.8613	114.989	103.802	93.744	95.9413	103.878	95.9614		112.264	100.763	97.9653	96.5952	98.8865	97.7329	98.0157	102.843		101.108	110.879	102.678	112.762	105.484	113.844	113.855	114.177		97.9202	119.168	153.98	165.92	150.381	182.831	163.608	78.9556		122.1	121.461	131.183
	23.9016	97.2222	78.4753	83.2618	79.3103	56.71	54.4554	60.3175	83.8462		78.0279	101.449	111.488	107.034	113.859	102.073	97.6916	95.5224		111.858	101.696	98.1565	97.7212	97.3974	101.147	99.2164	106.2		104.96	106.699	103.019	112.801	102.715	108.187	117.124	111.702		80.2572	129.275	133.9	134.956	200.775	187.442	161.962	113.926		115.054	129.59	117.889
	24.2693	94.1667	94.1704	74.6781	84.7291	58.4416	71.2871	68.254	76.9231		78.2422	103.727	109.519	94.8669	104.139	95.7686	103.324	93.5031		110.879	97.0177	98.4159	97.2118	98.1352	101.912	98.3696	105.171		104.809	106.736	106.183	114.445	105.119	113.439	112.979	107.2		83.0891	110.148	146.654	111.965	178.193	134.342	151.382	121.554		117.748	103.024	131.787
	24.6368	89.4444	96.4126	79.8283	65.0246	64.0693	63.8614	60.3175	80		84.2444	95.1346	113.567	98.9544	100.866	102.073	100.369	92.2739		108.884	101.696	97.064	96.7962	98.5645	99.3171	100.872	104.193		103.382	109.367	101.546	112.586	104.245	109.481	115.392	107.274		94.1863	98.6745	142.264	152.18	157.433	159.835	166.402	115.342		121.734	105.48	121.591
	25.0045	85	86.0987	69.0987	75.8621	56.2771	69.802	74.0741	72.3077		85.9593	97.619	120.022	96.0076	109.625	95.1641	98.0609	89.2011		112.301	102.728	99.0441	96.9571	96.9144	97.9514	98.7993	107.023		101.935	108.266	102.552	113.075	100.674	114.231	115.684	112.447		101.129	113.38	173.696	126.555	194.795	136.334	132.382	123.363		132.119	119.314	143.337
	25.3722	87.2222	71.3004	82.8326	75.8621	60.6061	85.6436	56.6138	76.1538		82.1008	101.346	109.3	99.0494	111.935	103.541	92.7054	91.3082		113.724	99.0954	98.6071	95.8981	99.9598	96.5583	99.5197	106.213		103.889	108.92	102.48	111.764	101.13	117.03	114.672	108.967		94.1282	142.139	131.953	130.565	184.692	120.897	163.751	119.9		130.384	138.983	119.044
	25.7399	84.7222	84.3049	78.5408	81.2808	61.039	51.9802	65.0794	76.1538		84.1372	91.9255	118.162	103.422	100.866	98.9637	93.4441	91.7471		111.507	100.862	96.0399	97.0375	99.2487	100.096	97.2826	103.602		104.058	109.909	101.725	113.212	103.389	114.713	108.815	104.67		99.3095	109.039	150.447	127.24	165.249	190.387	143.585	120.476		131.615	119.64	122.28
	26.1076	83.6111	77.5785	70.8155	84.7291	50.2165	59.4059	59.2593	80		86.6024	93.4783	108.534	106.749	106.833	98.1865	100.554	98.9464		110.399	100.975	95.7531	95.9651	97.0351	95.6296	101.302	104.219		106.312	108.155	103.63	110.765	105.593	113.651	111.753	107.851		103.578	120.495	153.263	125.989	212.746	165.281	169.685	123.683		132.039	130.159	135.215
	26.4753	88.6111	75.3363	70.8155	68.4729	67.0996	70.297	49.7354	74.6154		87.567	100.725	108.206	94.0114	101.829	92.7461	103.047	97.8051		107.795	102.134	95.002	100.871	97.612	100.56	98.2811	102.843		105.58	108.77	101.132	112.409	104.026	110.041	110.644	106.456		98.8217	133.7	152.8	137.297	151.758	131.935	207.19	131.079		121.649	135.571	134.154
	26.843	78.3333	81.1659	80.2575	90.6404	64.9351	70.297	76.7196	75.3846		84.4587	100.828	116.849	103.422	96.4389	94.3005	94.3675	96.4881		111.396	98.3604	98.4023	97.0107	94.7411	100.205	98.5971	106.702		103.438	107.483	103.954	108.534	102.733	111.798	113.913	111.051		107.82	124.225	145.593	114.102	148.516	134.146	123.003	127.994		142.208	121.184	122.608
	27.2108	107.222	90.583	79.3991	73.399	67.9654	54.9505	43.3862	81.5385		87.0311	105.694	102.079	106.369	108.373	97.323	90.2124	93.9421		107.351	97.894	93.377	101.354	96.5254	100.628	95.6648	104.039		104.171	109.517	105.32	108.593	104.227	112.338	109.438	110.381		81.1689	116.682	128.564	144.919	159.454	177.11	207.929	115.212		100.12	108.071	117.605
	27.5785	88.0556	80.7175	72.103	89.1626	56.71	62.8713	44.9735	92.3077		81.672	102.692	110.503	104.943	100.385	98.2729	96.5836	98.7709		111.858	100.226	96.0126	95.7775	95.385	99.6039	101.314	102.817		102.574	104.814	102.534	109.493	101.804	111.508	112.668	114.66		92.7506	127.223	153.258	117.698	177.015	156.308	214.756	107.002		127.031	124.169	133.16
	27.9462	91.9444	89.6861	80.2575	81.7734	61.9048	54.4554	71.9577	104.615		83.6013	102.795	112.801	108.175	104.042	98.1865	98.7073	94.9078		109.623	98.3322	96.6271	96.4343	94.9691	97.7329	97.0046	104.631		100.789	107.184	103.954	110.237	101.804	111.122	113.407	109.991		90.9259	114.616	140.549	132.286	168.068	180.306	137.174	90.7207		119.228	109.64	120.396
	28.3139	96.1111	75.7848	73.8197	89.6552	57.5758	64.8515	51.8519	69.2308		85.209	104.658	103.392	102.947	105.871	95.5095	100.739	98.8586		107.813	102.205	97.979	95.5764	96.8473	100.259	97.3458	106.535		104.565	106.923	106.776	111.039	100.528	113.169	110.274	105.786		88.6568	138.1	140.06	114.825	183.881	147.274	194.282	142.796		112.175	134.862	132.727
	28.6817	84.7222	74.8879	78.97	72.9064	57.5758	56.4356	61.9048	92.3077		85.3162	97.1014	117.615	103.137	106.737	97.0639	98.7073	82.8797		106.742	101.145	97.9517	93.8472	96.4314	100.027	99.4186	106.573		101.597	108.808	102.049	112.899	102.132	115.254	112.785	107.07		100.701	129.662	148.936	141.465	185.386	171.99	159.45	89.7864		125.99	135.062	124.037
	29.0494	90.8333	79.3722	72.5322	87.1921	65.368	64.8515	57.1429	91.5385		82.851	92.5466	113.129	102.376	107.7	99.0501	96.3066	97.7173		111.544	99.7456	95.7121	94.1555	92.93	100.874	97.2447	104.206		101.973	113.454	104.26	113.173	101.366	111.643	112.999	109.265		91.2121	116.598	155.971	117.415	164.759	152.734	168.536	106.75		122.801	125.668	131.958
	29.4173	82.2222	104.484	60.515	92.6108	58.4416	62.8713	57.1429	83.8462		85.7449	92.5466	108.425	98.6692	92.8778	92.7461	96.3066	96.5759		110.362	98.2332	94.9201	95.4424	95.707	99.8088	98.5086	105.583		105.58	110.058	104.942	112.625	99.0162	108.708	117.63	110.158		104.284	88.5746	179.17	106.542	158.924	147.517	168.536	115.182		134.224	94.0172	156.854
	29.7848	97.7778	87.8924	78.97	71.9212	61.4719	69.802	64.0212	84.6154		80.6002	103.106	121.444	94.2015	101.829	98.1002	102.031	96.4881		106.723	102.205	95.3434	97.185	95.4119	101.68	100.948	103.705		104.152	106.046	105.482	111.098	104.409	112.551	110.099	107.163		82.432	117.309	153.785	130.979	165.651	140.541	159.371	114.031		109.149	116.284	120.734
	30.1529	89.1667	88.3408	71.2446	87.6847	70.1299	55.9406	64.5503	108.462		85.7449	95.4451	114.223	106.369	109.817	105.786	100.369	93.8543		111.101	98.7986	96.3676	98.9276	97.4779	100.478	98.0789	104.669		101.935	106.438	104.655	111.666	103.152	110.562	109.652	111.498		96.1625	108.042	160.325	121.308	156.591	189.104	155.49	86.5323		124.599	111.838	135.263
	30.5203	81.1111	88.7892	75.9657	77.8325	50.6494	78.2178	63.4921	80		85.6377	94.9275	114.661	100.095	106.352	94.3005	100.369	100.351		107.665	99.9293	93.377	94.1421	97.5718	97.6919	96.9414	101.891		99.9812	106.96	105.823	110.981	105.976	109.423	113.252	105.916		105.581	106.913	150.938	128.603	209.978	120.561	158.082	125.439		132.738	112.547	122.92
	30.8882	93.6111	86.9955	82.4034	74.8768	55.8442	64.8515	60.3175	71.5385		80.3859	91.5114	115.864	107.129	107.218	101.036	104.524	95.7858		106.908	96.9894	96.9548	96.5147	96.6729	101.748	97.1815	103.769		105.298	109.013	102.301	110.648	105.502	111.045	114.166	105.767		85.8721	105.191	140.606	143.074	191.996	155.796	173.291	133.894		114.204	111.488	117.659
	31.2559	90	80.7175	64.3777	70.4433	61.9048	75.2475	65.6085	81.5385		81.9936	95.0311	116.958	104.848	100.962	104.145	104.247	97.0149		104.95	98.6431	96.9138	98.6327	96.2034	101.175	96.5748	107.551		105.241	109.647	107.459	112.468	101.804	113.458	113.485	106.586		91.104	117.733	181.675	148.84	163.093	138.403	158.893	118.981		116.611	122.208	150.539
	31.6237	95.2778	84.3049	81.5451	75.3695	59.3074	68.8119	67.7249	90.7692		87.0311	101.035	109.409	106.464	102.31	98.2729	103.232	93.9421		111.138	98.9541	94.8791	94.3566	98.0547	100.041	97.0677	106.007		102.499	104.012	103.235	110.335	104.81	109.481	116.346	108.856		91.3446	119.845	134.17	141.256	172.508	142.814	152.428	103.495		116.646	117.376	116.352
	31.9911	92.2222	113.453	65.2361	72.9064	74.8918	72.2772	52.9101	76.9231		75.7771	103.002	116.193	96.2928	100.866	92.1416	101.57	95.1712		107.998	98.7279	97.0367	95.4021	98.1621	97.5143	96.8402	107.191		104.715	108.677	104.08	112.214	106.431	111.894	117.319	110.698		82.1679	90.7884	178.111	132.077	134.683	127.484	191.967	123.723		117.106	87.021	148.747
	32.3591	103.889	80.7175	67.382	82.7586	64.0693	57.4257	48.6772	88.4615		81.0289	97.205	114.004	96.1977	103.465	100.864	103.601	93.3275		109.328	98.5159	97.0231	97.4531	97.0351	97.4734	98.7487	105.158		104.02	109.125	102.93	111.039	105.393	111.18	111.364	110.772		77.9958	120.426	169.191	116.239	161.489	175.642	212.833	105.501		105.235	122.05	143.99
	32.7268	88.3333	82.5112	75.9657	75.8621	53.2468	66.3366	59.2593	72.3077		83.4941	101.035	103.173	104.373	109.432	98.0138	93.9058	90.079		109.143	97.8375	95.4937	94.1823	94.8752	100.191	99.9874	104.103		104.697	107.949	104.17	112.312	101.713	113.478	116.229	109.47		94.5216	122.45	135.815	137.582	205.519	147.752	158.466	124.577		123.558	118.575	125.706
	33.0942	85.2778	104.036	70.3863	68.9655	52.8139	67.8218	53.4392	91.5385		82.5295	102.484	116.521	94.4867	109.24	97.323	93.3518	100.615		100.868	98.4735	94.4695	94.9866	94.7679	97.3231	98.18	105.03		103.419	109.741	103.361	112.703	104.609	114.52	113.076	109.34		96.7772	98.5088	165.545	137.006	206.839	143.498	174.688	109.915		118.282	94.6534	134.216
	33.4622	82.2222	87.8924	75.5365	69.9507	60.6061	71.2871	62.963	106.154		82.5295	95.1346	111.379	102.947	110.106	107.081	92.6131	96.8393		108.46	99.7032	94.2373	97.2654	95.9351	97.3641	96.3473	102.495		104.791	114.35	104.565	111	102.095	116.103	113.758	110.214		100.374	108.24	147.45	147.17	181.675	150.211	147.091	91.2255		131.91	113.438	124.757
	33.8297	83.8889	65.4709	66.0944	79.3103	60.6061	64.8515	65.0794	96.1538		79.5284	100.518	115.208	98.9544	101.925	102.677	95.5679	99.2098		105.652	98.8551	94.4285	96.3003	99.128	102.417	98.4075	104.052		102.912	106.177	100.144	111.137	101.767	111.064	114.478	107.2		94.8021	153.53	174.308	124.769	168.176	158.326	146.848	103.178		125.943	150.991	142.869
	34.1974	87.2222	79.3722	83.2618	82.266	59.7403	66.3366	70.8995	81.5385		78.3494	96.5839	111.707	102.091	107.507	95.8549	95.0139	98.4197		106.206	97.9081	95.5619	98.4316	97.3035	96.9407	96.8782	103.64		103.964	106.83	107.243	110.452	102.095	114.269	117.163	105.47		89.8273	121.685	134.163	124.099	179.958	144.498	134.012	120.703		121.765	123.353	114.773
	34.5654	99.7222	74.4395	73.8197	57.6355	58.0087	59.4059	56.6138	88.4615		81.672	98.6542	105.361	106.654	105.005	97.9275	101.293	93.9421		105.375	97.9223	97.9107	96.8767	95.5192	97.8967	94.9697	105.673		102.273	110.58	103.702	108.593	104.755	111.875	113.894	108.707		81.8995	132.529	142.727	185.049	181.016	164.845	178.919	106.195		105.668	131.546	132.635
	34.9328	120.833	93.722	66.0944	91.6256	53.2468	72.2772	50.2646	76.1538		90.1393	99.0683	108.753	100.285	108.662	97.2366	102.031	96.8393		110.325	100.961	94.6197	99.3968	97.2096	98.484	98.6223	102.573		109.111	108.602	105.697	113.603	104.008	114.095	111.072	110.344		74.5981	105.704	164.541	109.451	204.073	134.533	202.989	127.163		91.3035	107.724	143.158
	35.3005	92.7778	78.9238	66.0944	72.9064	55.4113	66.3366	55.0265	87.6923		85.3162	97.1014	103.063	100.095	110.587	94.8187	102.401	95.1712		109.937	96.2261	96.4632	95.2815	97.3571	98.8118	95.5763	103.743		105.223	107.24	102.372	111.568	104.482	114.559	112.862	106.121		91.9576	123.032	155.934	137.293	199.575	142.936	186.094	108.529		118.495	121.923	145.948
	35.6682	93.3333	85.2018	75.9657	70.936	64.0693	68.8119	66.1376	100		81.9936	96.9979	112.91	105.608	96.1501	90.1554	99.0766	94.2932		106.428	99.6608	95.9989	95.8043	95.224	98.4157	102.414	104.515		104.997	109.797	107.315	111.02	106.085	112.377	111.773	109.451		87.8503	113.845	148.633	148.878	150.072	131.017	149.804	94.2932		114.03	116.97	126.371
	36.0362	80.8333	78.9238	70.8155	56.1576	61.4719	61.8812	67.1958	81.5385		84.7803	104.348	109.956	102.471	107.122	95.0777	103.324	97.5417		108.072	97.2155	94.7289	95.5764	99.5305	96.4354	100.24	104.206		103.738	107.949	106.578	110.276	102.86	111.682	116.579	108.484		104.883	132.213	155.272	182.471	174.262	153.646	153.766	119.627		133.697	123.177	133.769
	36.4036	128.611	134.081	99.5708	133.005	96.1039	131.188	130.688	190.769		120.472	156.522	151.86	141.35	145.332	134.715	127.978	124.407		106.317	100.65	95.7395	100.094	95.8814	99.7815	99.4565	105.145		100.845	105.038	103.9	110.765	102.04	114.115	116.91	108.223		93.6712	116.737	152.515	106.274	151.224	102.688	97.9264	65.2135		82.6655	75.0669	96.1521
	36.7714	127.5	134.081	102.575	122.167	92.2078	134.653	110.582	190		110.825	158.178	154.158	146.198	141.097	124.525	126.316	119.227		107.721	228.763	224.457	219.155	217.95	219.093	209.037	206.2		174.77	253.76	244.249	255.627	235.617	247.036	252.559	233.953		86.9218	117.972	150.287	119.67	153.021	92.4782	114.228	62.7513		84.4868	170.616	218.822
	37.1394	137.778	120.179	115.88	126.601	102.165	122.772	120.106	180		115.541	148.447	152.954	142.3	145.14	136.528	125.3	126.427		163.373	234.12	225.509	220.255	215.2	222.057	213.903	203.396		177.212	261.933	243.835	251.811	235.799	250.203	252.364	229.544		83.8606	123.521	131.994	112.401	142.065	111.205	104.325	70.2371		118.577	194.809	194.606
	37.5071	130.278	127.354	106.438	143.842	110.39	130.198	123.28	192.308		120.364	148.447	155.361	146.863	141.001	131.52	140.074	122.651		165.811	227.929	224.662	217.426	214.462	221.551	212.664	212.555		177.287	257.436	248.4	244.647	232.447	243.406	251.236	235.293		92.3906	116.562	145.964	102.1	127.73	101.015	113.622	63.7788		127.275	178.973	211.074
	37.8745	137.778	124.215	135.622	115.764	104.329	112.871	113.228	197.692		123.473	153.106	146.608	140.875	149.471	134.888	131.117	127.919		169.893	227.336	219.869	215.617	221.25	215.993	214.295	204.605		194.139	262.68	241.571	249.775	227.036	242.692	248.181	228.54		89.6173	123.258	108.1	121.692	143.269	119.506	115.8	64.7062		123.309	183.018	162.119
	38.2423	124.722	122.422	109.442	119.212	112.554	126.238	118.519	175.385		113.398	151.76	168.818	139.734	138.595	127.202	128.994	121.071		170.151	232.834	219.514	221.649	215.656	218.014	202.705	216.812		189.498	255.048	240.546	245.39	227.145	241.301	245.807	232.726		90.9202	123.965	154.254	117.215	123.136	100.764	108.838	69.0318		136.424	190.19	200.575
RAW DATA
		Measurement at 380nm (free Fura-2) - REFERENCE									Measurement at 340nm (Ca bound Fura-2) - SET1									Measurement at 340nm (Ca bound Fura-2) - SET 2									Measurement at 340nm (Ca bound Fura-2) - SET 3
		Concentrations Ca (mM)
	Time norm	0	0.2	0.2	0.2	0.2	2	2	2		0	0.2	0.2	0.2	0.2	2	2	2		0	0.2	0.2	0.2	0.2	2	2	2		0	0.2	0.2	0.2	0.2	2	2	2
	-11.9839	433	321	389	367	313	379	373	409		857	967	897	903	927	974	894	892		5091	5004	5007	5173	5171	4789	5124	5006		5118	5132	5113	4749	5001	4825	5099	4965
	-11.616	391	337	352	388	408	353	382	325		919	862	853	965	907	854	822	982		5139	4891	5007	5080	5078	5090	5185	5233		5187	5017	5236	4838	4922	4922	4996	5037
	-11.2486	348	341	388	377	342	332	394	399		971	806	860	847	911	899	875	785		4935	4930	5060	5052	5150	4936	5296	5216		5187	5202	5125	4958	5107	5274	4773	4992
	-10.8809	406	317	327	386	369	328	355	385		853	801	885	924	877	884	824	910		5323	4956	4957	5126	5122	4839	5019	5257		5177	5048	5077	4901	5051	4821	4909	5060
	-10.5131	346	295	319	316	331	309	327	333		915	850	811	867	901	826	857	847		5060	5055	4999	5141	5019	4939	5191	5083		5233	5022	5023	4858	5049	4738	4952	5028
	-10.1454	367	262	365	352	355	361	358	324		829	811	839	878	907	900	853	804		4988	4902	5056	5193	5117	4977	5367	5198		5085	5122	5118	4801	5094	4913	5210	4883
	-9.77767	360	302	321	372	337	374	320	350		851	758	774	827	810	790	758	810		5111	4967	4810	5052	4961	4862	5074	5026		5150	5166	4954	4903	4970	4987	4891	4861
	-9.4097	370	345	320	307	294	351	346	322		879	849	799	826	845	837	886	816		4907	4884	5031	5091	4912	4723	5272	5069		5184	4953	5212	5081	5118	5033	5020	4948
	-9.04225	343	308	288	325	316	328	336	316		795	821	840	822	772	821	770	857		4927	4777	5038	5066	5023	4955	5125	4907		5084	4979	5093	4900	4928	5005	4874	4847
	-8.67428	400	288	334	385	324	329	358	357		879	827	863	863	798	873	769	809		5049	5067	5078	5003	5139	4970	5136	5191		5063	4993	5049	4832	5059	4963	4882	4897
	-8.30678	389	295	335	308	334	356	296	305		828	795	791	839	779	789	759	852		5190	4977	4937	4941	4962	4950	5130	5074		5116	5013	5064	5033	5052	5070	4990	4984
	-7.93908	329	320	291	322	339	324	355	331		830	833	832	812	797	898	803	861		5023	4984	5018	5039	5001	4793	5217	5024		5203	4856	5271	4807	4992	5010	4904	5025
	-7.57112	429	280	356	328	307	349	371	343		790	784	759	782	793	826	805	779		4890	4876	4854	5015	4927	4957	5003	5062		5084	4953	5252	4855	4995	4912	5088	4862
	-7.2036	423	317	303	329	303	339	310	298		873	780	784	837	841	831	776	814		4998	4821	4906	5099	4987	4993	5127	4930		5157	5089	4933	4948	4750	5046	4884	4928
	-6.83563	393	302	350	373	318	342	285	352		896	888	806	825	790	853	841	770		4962	4870	4911	4958	4980	4782	5072	5114		4895	5069	5039	4780	4875	4954	4827	4789
	-6.4682	386	333	300	339	320	339	302	328		912	785	775	880	788	770	745	833		5098	5047	5078	5048	5067	4827	5010	5002		5139	5204	5055	4974	4983	4972	5128	4913
	-6.10048	424	325	340	330	314	354	331	329		849	841	807	787	835	858	742	785		4995	4947	4897	4921	4863	4767	5067	5135		5141	5026	5011	4978	4987	5094	4923	4949
	-5.73275	401	305	362	320	372	319	302	341		842	791	773	808	901	792	829	739		4750	4867	5179	5021	4881	4794	5058	5157		5088	5069	5006	4785	4955	4966	4938	4919
	-5.36505	392	329	332	308	308	324	277	273		849	801	818	846	852	794	819	739		5086	4889	5013	4943	4970	4662	4956	5166		5091	4876	5032	4720	4847	5000	4988	4779
	-4.21132	369	351	343	344	405	402	301	352		855	880	916	889	923	910	845	819		4850	5043	4927	4899	5034	4705	5090	5170		5209	5009	5121	4924	4855	4886	4862	4808
	-3.88573	332	329	299	357	344	317	342	348		931	877	853	872	890	857	797	829		5637	5558	5441	5948	5784	5440	5747	5747		5488	5445	5338	5342	5257	5199	5257	5608
	-3.51828	359	311	364	376	385	338	312	322		952	812	839	849	829	844	825	762		5682	5597	5383	5510	5457	5636	5715	5865		5523	5507	5305	4994	5382	5352	5307	5374
	-3.15058	354	357	315	343	375	310	339	317		862	834	840	913	876	913	818	850		5650	5365	5403	5629	5365	5470	5575	5528		5476	5456	5436	5210	5256	5211	5345	5363
	-2.78287	363	334	321	349	343	341	320	372		812	819	839	768	904	870	754	800		5824	5580	5503	5717	5490	5236	5811	5609		5421	5292	5325	5130	5054	5463	5276	5243
	-2.41515	323	333	319	356	331	373	329	304		837	823	756	888	869	802	850	828		5751	5658	5439	5627	5413	5635	5593	5663		5419	5447	5442	5185	5297	5292	5195	5176
	-2.04745	329	341	335	343	322	361	299	298		884	916	860	830	966	838	838	726		5575	5548	5409	5638	5445	5437	5650	5658		5539	5475	5353	5141	5393	5112	5238	5236
	-1.67972	504	336	317	351	359	385	353	318		807	785	872	800	842	852	793	833		5714	5545	5637	5591	5607	5316	5687	5727		5451	5311	5198	5224	5324	5176	5344	5027
	-0.325517	352	244	249	180	168	224	182	188		842	860	1023	1010	978	1068	1084	1143		5693	5706	5406	5521	5490	5408	5578	5744		5355	5499	5433	5120	5164	5089	5395	5197
	0	360	223	233	203	231	202	189	130		933	966	914	1052	1039	1158	1083	1139		5414	7075	7323	7460	7454	7322	7912	7774		5323	5359	5564	5109	5489	5179	5139	5375
	0.3677	321	251	188	215	167	186	182	142		872	949	1089	1130	978	1097	1156	1004		6297	7086	7181	7416	7574	7259	7638	7442		5946	6097	6262	6317	6174	6353	6309	6285
	0.735417	349	221	184	180	200	159	190	160		866	970	1082	1027	1032	1093	1069	1114		6300	7242	7389	7567	7226	7456	7875	7738		5931	6262	6263	6197	6201	6312	6302	5980
	1.1034	387	227	207	187	150	167	144	150		760	1012	1060	1101	1027	1137	1069	1060		6297	7201	7372	7586	7718	7384	8036	7715		5903	6081	6008	6285	6077	6170	6260	5988
	1.47083	312	227	201	211	205	178	149	138		809	980	1043	1131	1033	1078	1036	1131		6478	7120	7117	7279	7304	7582	8053	8051		5794	6016	6325	5978	6035	6248	6237	6097
	1.83855	364	203	236	201	191	191	182	140		905	988	1002	964	1029	1186	1154	1093		6570	7167	7378	7606	7467	7368	7942	7821		5856	6241	5924	6128	5736	6432	6092	6290
	2.20625	410	249	226	215	163	219	144	127		821	978	1052	1064	1007	1046	1104	1054		6265	7243	7285	7507	7315	7408	8063	7949		5881	6111	6274	6312	5859	6332	6530	5959
	2.574	381	186	204	184	167	156	148	138		928	946	977	1079	1061	1185	1112	1166		6440	7282	6981	7535	7452	7420	7869	7744		5905	6111	5951	6144	5983	6282	6246	6070
	2.94172	315	218	190	196	186	170	143	128		871	937	1009	1096	1047	1143	1143	1100		6213	7146	7168	7540	7458	7418	7842	8252		6037	6253	6113	5939	5806	6097	6164	6251
	3.30942	351	211	202	204	142	167	130	136		840	992	995	1067	1081	1137	1147	1096		6100	7170	7246	7381	7247	7257	8027	8233		5785	6197	6197	6023	5917	6236	6053	6173
	3.67715	364	177	226	187	166	166	163	111		881	1018	1032	1022	1035	1180	1086	1158		6224	7074	7070	7358	7336	7403	7857	8067		5562	6212	6000	5803	5887	6073	6117	6056
	4.04485	367	212	195	201	170	138	146	132		837	1020	1014	1065	1030	1154	1078	1133		6132	7360	7314	7146	7314	7214	7814	7917		5903	5996	6169	5932	5835	5925	6065	6177
	4.41282	377	214	186	201	151	149	131	110		836	996	1061	1140	1092	1173	1052	1050		6197	7155	7078	7293	7549	7463	8266	8332		5782	6167	6293	6126	5842	5938	6212	5994
	4.7803	351	224	179	181	181	155	136	102		796	1021	1091	1127	1045	1100	1050	1135		6139	7239	7370	7390	7245	7414	7803	7884		5852	6050	6202	6077	5824	6033	6162	6057
	5.148	291	193	218	186	145	177	140	112		794	915	997	1025	1016	1145	1036	1110		6277	7057	7215	7455	7227	7438	7870	7826		5748	6136	5948	5875	5959	6375	6124	5872
	5.51598	358	195	197	186	180	176	148	120		923	1023	1053	1100	996	1101	1110	1067		5958	7280	7112	7421	7200	7285	7709	8103		5785	6006	6127	6114	6044	6246	6036	6080
	5.88342	299	185	212	212	167	176	145	119		859	979	1088	1055	1058	1123	1052	1141		6121	7071	7012	7262	7572	7122	7929	8320		5706	6109	6157	6154	5904	5996	6214	6095
	6.25113	369	202	141	168	176	161	141	114		813	969	1065	1080	1017	1163	1148	1110		5949	7156	7189	7376	7218	7241	7973	8073		5862	6088	6193	5981	5898	6093	6336	6073
	6.61885	389	188	201	181	162	124	145	120		833	1030	1004	1078	1068	1092	1089	1157		5961	7236	7418	7539	7492	7303	7801	8147		5994	6086	5828	5900	5981	6089	6172	5982
	6.98658	366	225	174	191	162	182	94	151		852	964	972	1151	989	1045	1019	1022		6162	7304	7077	7256	7337	7386	7656	8064		5766	5957	5963	5851	5792	6190	6159	6041
	7.35432	338	209	227	174	181	138	145	118		770	948	1012	1084	1023	1092	1085	1072		6028	7085	7021	7248	7397	7250	7924	8200		5851	6125	6186	5910	6177	6022	6104	5979
	7.7223	341	214	184	197	138	167	101	129		777	994	1020	1066	1040	1177	1122	1218		6066	7129	7017	7322	7347	7218	7922	8021		5667	5901	5794	5858	5810	6100	6244	6145
	8.08973	303	216	182	177	142	148	105	113		850	1032	1019	1083	941	1068	1091	1170		6053	7253	7047	7271	7296	7274	7943	8138		5821	6161	5985	6094	5947	6140	6152	6095
	8.45745	378	185	185	173	153	140	107	118		876	960	995	1143	980	1075	1082	1177		6212	7076	7134	7329	7107	7681	7725	7889		5735	6006	5889	5851	5973	6028	6128	6019
	8.82515	303	167	173	150	108	130	168	103		884	958	1041	1108	1072	1161	1042	1102		6142	7358	7093	7407	7378	7261	7981	7797		5756	5822	6054	5929	5905	6074	6226	5996
	9.19312	292	211	199	198	141	150	137	146		822	1046	1021	1146	1082	1100	1063	1010		6065	7241	7137	7359	7472	7255	7709	7922		5840	6062	6164	6110	5918	6054	6136	6194
	9.56082	337	189	194	184	172	162	122	104		840	1019	1069	1128	990	1230	1030	1105		6424	7149	7234	7453	7396	7447	7885	8236		5713	6151	5915	5996	5989	5980	6027	6200
	9.92827	334	177	217	153	159	140	132	108		831	1026	969	1050	1008	1228	1027	1029		6164	7174	6983	7390	7483	7581	7900	8106		5805	6048	5973	5873	5957	6077	6319	6054
	10.296	333	220	178	189	156	145	125	112		866	992	1017	1063	997	1061	1143	1123		6039	6869	7301	7263	7561	7761	7857	7951		5933	5980	5950	6067	5952	6052	6128	6170
	10.664	328	196	197	166	168	103	132	100		821	1022	1013	1110	1055	1140	1111	1069		6159	7300	7155	7345	7443	7171	7884	7892		5619	5964	5978	6111	6125	5960	5949	6085
	11.0317	345	223	191	192	155	123	112	104		792	976	1059	1080	1105	1094	1078	1132		5974	7124	7044	7544	7216	7429	7800	8055		5842	6180	5816	5878	5788	6143	6106	5998
	11.3991	313	212	197	186	162	148	117	112		831	940	970	1109	1026	1175	1087	1178		6138	7067	6912	7449	7464	7448	7872	8305		5758	5833	5932	5991	5886	6143	6101	6120
	11.7668	314	191	179	151	121	160	97	136		740	1022	1004	1069	1045	1088	1062	1104		6108	7019	7044	7245	7443	7558	7726	8312		5640	6028	5898	5952	5804	6164	5975	5890
	12.1345	341	217	177	186	153	146	140	119		772	1013	1023	1073	1018	1146	1038	1069		6118	7332	7178	7208	7587	7571	7982	8386		5635	5941	5833	5937	5782	6046	5845	5935
	12.5025	344	191	216	168	157	126	136	115		877	1059	1001	1083	1074	1175	1130	1101		6194	7103	7079	7525	7285	7418	8141	8032		5615	6044	5932	5798	5721	5874	5994	5924
	12.87	454	206	184	164	173	147	144	135		828	983	1065	1137	1083	1148	1020	1092		6186	7436	7098	7396	7610	7380	7959	8173		5717	5935	6041	5805	5834	6040	6021	6135
	13.2377	352	205	167	138	173	146	120	90		891	963	950	1106	1063	1140	1096	1189		6025	7312	7080	7280	7143	7463	7913	8218		5712	5848	5625	5972	5775	5977	6152	5917
	13.6057	296	149	191	141	151	145	103	128		768	958	1011	1111	1106	1222	1042	1110		5851	7041	7079	7390	7178	7450	7830	8138		5913	6032	6019	5706	5948	5876	5984	6130
	13.9733	337	208	152	184	149	144	91	122		819	937	1036	1063	1087	1045	1142	1122		6224	7307	7421	7476	7247	7442	7800	8081		5635	5935	5966	5974	5905	5963	6047	6086
	14.3411	356	233	172	168	173	139	122	106		801	1005	1006	1108	1035	1173	1087	1107		6080	7233	7026	7451	7361	7572	7807	8197		5655	5952	5741	5677	5708	6076	6026	6206
	14.7088	277	196	200	177	140	146	116	128		852	1050	1021	1127	1075	1158	1079	1064		6094	7180	7200	7426	7397	7385	7562	8124		5693	5949	5947	5756	5689	5974	6033	6062
	15.0765	340	201	175	170	182	132	123	124		852	1001	1084	1097	999	1151	1163	1187		6086	7143	7153	7419	7121	7373	7964	8412		5643	6011	6004	5771	5775	6258	5954	6080
	15.444	345	208	189	149	139	154	132	129		791	980	961	1101	1160	1181	1113	1073		6194	7343	6975	7322	7361	7284	7725	8320		5662	5985	5911	5745	5768	5760	6004	6117
	15.812	308	202	198	189	168	144	116	119		826	986	1008	1111	1052	1109	1032	1065		6127	7146	7186	7603	7445	7337	8071	8189		5620	6077	5715	5619	5770	5759	5970	5973
	16.1794	306	196	195	193	138	133	120	132		828	930	1019	1073	1089	1143	1099	1119		6299	6895	7127	7362	7369	7320	7834	8112		5581	5932	5889	5838	5803	5949	5760	5918
	16.5471	337	201	194	159	124	139	125	106		806	962	1037	997	1071	1119	1054	1076		5968	7095	7026	7297	7158	7549	7685	8144		5512	5747	5965	5931	5828	5932	5859	6003
	16.9151	403	189	164	172	169	146	127	105		753	939	1034	1038	1104	1137	1039	1066		6137	7048	6830	7370	7211	7450	7835	8109		5566	5655	5818	5769	5813	6037	6020	6118
	17.2825	365	186	191	159	156	135	113	131		831	948	1048	1065	1085	1169	1052	1154		6050	7197	7083	7443	7621	7275	7862	8098		5514	5900	6100	5706	5691	5929	6040	5904
	17.6502	347	177	170	177	148	139	137	101		793	1011	1078	1043	1004	1192	1155	1063		6021	6963	7109	7155	7328	7251	7905	7972		5532	5854	5832	5863	5778	5839	5899	6150
	18.0179	299	188	201	173	163	150	120	102		811	980	1053	1140	1113	1138	1104	1076		6298	6982	7199	7509	7386	7285	8106	8059		5646	5781	5912	5715	5825	5866	5906	6038
	18.3857	284	194	162	166	150	142	113	118		772	941	1000	1158	1137	1111	1064	1097		6112	7253	7134	7394	7447	7453	7773	8383		5526	5863	5813	5893	5833	5730	5930	6002
	18.7534	303	203	195	166	144	128	114	110		762	931	1074	1086	978	1122	1096	1067		6094	6925	7071	7328	7019	7350	7830	7928		5671	5978	5997	5872	5790	5706	5922	6128
	19.1214	323	221	161	168	148	147	103	104		812	852	946	1057	1037	1080	953	1088		6120	7298	7212	7541	7194	7572	7740	8126		5747	5855	5771	5675	5779	6008	5945	5941
	19.4888	382	158	149	149	130	150	142	104		812	945	1057	1035	1145	1120	1077	1114		6012	7093	7191	7363	7184	7233	7865	7991		5531	5927	5797	5948	5766	5770	5841	5858
	19.8568	306	185	173	154	142	143	99	118		811	948	1003	1090	1008	1131	1049	1143		5885	7282	7184	7509	7458	7419	7914	7886		5599	5781	6009	5798	5837	5913	5909	5734
	20.2245	300	209	203	163	163	126	124	148		756	933	944	1065	1167	1069	1126	1130		5936	7127	7152	7289	7287	7410	7889	8170		5612	5882	5833	5823	5735	5885	5789	5977
	20.5919	303	189	184	181	177	113	129	108		850	988	1019	1071	1039	1089	1072	1095		5859	7225	7346	7266	7380	7492	7667	8292		5545	5878	5799	5765	5795	6034	5773	5972
	20.9599	322	168	181	149	148	129	139	126		823	934	1002	1101	1075	1057	1064	1164		5890	7164	7029	7376	7156	7083	7689	7966		5589	5835	5870	5773	5611	5893	5884	5862
	21.3276	345	165	176	155	103	122	131	126		812	984	980	1103	1076	1077	1102	1001		5887	7059	7241	7389	7455	7185	7737	8164		5570	5791	5926	5754	5920	5633	5724	5798
	21.6951	343	174	172	145	153	127	134	112		791	915	1092	1111	1025	1188	1106	1084		6143	7233	7176	7181	7509	7417	7979	8192		5707	5938	5840	5750	5715	5805	5775	5793
	22.0631	347	170	168	190	133	124	102	132		821	974	969	1097	1064	1132	1118	1137		6181	7253	7414	7427	7223	7161	7894	8286		5511	5682	5771	5651	5820	5916	5928	5911
	22.4308	341	183	194	166	150	135	113	97		806	960	976	1030	1043	1184	1053	1066		6065	7090	7090	7374	7115	7376	8066	8266		5726	5744	5790	5774	5694	5913	5717	5865
	22.7985	321	220	156	179	152	149	113	118		850	1000	985	1006	1063	1200	1071	1136		6008	7235	7404	7392	7351	7285	7815	8239		5539	5730	6027	5580	5763	5971	5967	5948
	23.1659	332	201	194	172	117	142	130	123		807	963	943	1073	1145	1154	1113	1163		5978	6956	7024	7145	7425	7498	7781	8031		5823	5875	5707	5618	5506	6048	5911	6011
	23.5337	331	185	174	127	144	106	120	158		840	955	1051	1092	974	1111	1125	1093		6078	7129	7174	7206	7371	7156	7755	7995		5382	5942	5713	5761	5790	5896	5851	6137
	23.9016	350	175	194	161	131	110	114	109		728	980	1019	1126	1183	1182	1058	1088		6056	7195	7188	7290	7260	7406	7850	8256		5587	5718	5732	5763	5638	5603	6019	6004
	24.2693	339	210	174	172	135	144	129	100		730	1002	1001	998	1082	1109	1119	1065		6003	6864	7207	7252	7315	7462	7783	8176		5579	5720	5908	5847	5770	5875	5806	5762
	24.6368	322	215	186	132	148	129	114	104		786	919	1038	1041	1048	1182	1087	1051		5895	7195	7108	7221	7347	7272	7981	8100		5503	5861	5650	5752	5722	5670	5930	5766
	25.0045	306	192	161	154	130	141	140	94		802	943	1097	1010	1139	1102	1062	1016		6080	7268	7253	7233	7224	7172	7817	8320		5426	5802	5706	5777	5526	5916	5945	6044
	25.3722	314	159	193	154	140	173	107	99		766	979	999	1042	1163	1199	1004	1040		6157	7011	7221	7154	7451	7070	7874	8257		5530	5837	5702	5710	5551	6061	5893	5857
	25.7399	305	188	183	165	141	105	123	99		785	888	1080	1088	1048	1146	1012	1045		6037	7136	7033	7239	7398	7329	7697	8054		5539	5890	5660	5784	5675	5941	5592	5626
	26.1076	301	173	165	172	116	120	112	104		808	903	992	1123	1110	1137	1089	1127		5977	7144	7012	7159	7233	7002	8015	8102		5659	5796	5766	5659	5796	5886	5743	5797
	26.4753	319	168	165	139	155	142	94	97		817	973	989	989	1058	1074	1116	1114		5836	7226	6957	7525	7276	7363	7776	7995		5620	5829	5627	5743	5710	5699	5686	5722
	26.843	282	181	187	184	150	142	145	98		788	974	1068	1088	1002	1092	1022	1099		6031	6959	7206	7237	7062	7337	7801	8295		5506	5760	5784	5545	5639	5790	5854	5969
	27.2108	386	202	185	149	157	111	82	106		812	1021	933	1119	1126	1127	977	1070		5812	6926	6838	7561	7195	7368	7569	8088		5545	5869	5860	5548	5721	5818	5624	5933
	27.5785	317	180	168	181	131	127	85	120		762	992	1010	1104	1043	1138	1046	1125		6056	7091	7031	7145	7110	7293	8016	7993		5460	5617	5705	5594	5588	5775	5790	6163
	27.9462	331	200	187	166	143	110	136	136		780	993	1031	1138	1081	1137	1069	1081		5935	6957	7076	7194	7079	7156	7675	8134		5365	5744	5784	5632	5588	5755	5828	5912
	28.3139	346	169	172	182	133	131	98	90		795	1011	945	1083	1100	1106	1091	1126		5837	7231	7175	7130	7219	7341	7702	8282		5566	5730	5941	5673	5518	5861	5667	5686
	28.6817	305	167	184	148	133	114	117	120		796	938	1075	1085	1109	1124	1069	944		5779	7156	7173	7001	7188	7324	7866	8285		5408	5831	5678	5768	5606	5969	5796	5755
	29.0494	327	177	169	177	151	131	108	119		773	894	1034	1077	1119	1147	1043	1113		6039	7057	7009	7024	6927	7386	7694	8101		5428	6080	5801	5782	5564	5782	5807	5873
	29.4173	296	233	141	188	135	127	108	109		800	894	991	1038	965	1074	1043	1100		5975	6950	6951	7120	7134	7308	7794	8208		5620	5898	5839	5754	5435	5630	6045	5921
	29.7848	352	196	184	146	142	141	121	110		752	996	1110	991	1058	1136	1105	1099		5778	7231	6982	7250	7112	7445	7987	8062		5544	5683	5869	5676	5731	5829	5658	5760
	30.1529	321	197	166	178	162	113	122	141		800	922	1044	1119	1141	1225	1087	1069		6015	6990	7057	7380	7266	7357	7760	8137		5426	5704	5823	5705	5662	5726	5635	5993
	30.5203	292	198	177	158	117	158	120	104		799	917	1048	1053	1105	1092	1087	1143		5829	7070	6838	7023	7273	7153	7670	7921		5322	5732	5888	5670	5817	5667	5820	5693
	30.8882	337	194	192	152	129	131	114	93		750	884	1059	1127	1114	1170	1132	1091		5788	6862	7100	7200	7206	7450	7689	8067		5605	5842	5692	5653	5791	5751	5867	5685
	31.2559	324	180	150	143	143	152	124	106		765	918	1069	1103	1049	1206	1129	1105		5682	6979	7097	7358	7171	7408	7641	8361		5602	5876	5979	5746	5588	5876	5832	5729
	31.6237	343	188	190	153	137	139	128	118		812	976	1000	1120	1063	1138	1118	1070		6017	7001	6948	7039	7309	7325	7680	8241		5456	5574	5744	5637	5753	5670	5979	5851
	31.9911	332	253	152	148	173	146	100	100		707	995	1062	1013	1048	1067	1100	1084		5847	6985	7106	7117	7317	7140	7662	8333		5574	5824	5791	5733	5842	5795	6029	5950
	32.3591	374	180	157	168	148	116	92	115		756	939	1042	1012	1075	1168	1122	1063		5919	6970	7105	7270	7233	7137	7813	8175		5537	5848	5727	5673	5785	5758	5723	5954
	32.7268	318	184	177	154	123	134	112	94		779	976	943	1098	1137	1135	1017	1026		5909	6922	6993	7026	7072	7336	7911	8093		5573	5785	5796	5738	5583	5877	5973	5884
	33.0942	307	232	164	140	122	137	101	119		770	990	1065	994	1135	1127	1011	1146		5461	6967	6918	7086	7064	7126	7768	8165		5505	5881	5751	5758	5742	5931	5811	5877
	33.4622	296	196	176	142	140	144	119	138		770	919	1018	1083	1144	1240	1003	1103		5872	7054	6901	7256	7151	7129	7623	7968		5578	6128	5818	5671	5604	6013	5846	5924
	33.8297	302	146	154	161	140	131	123	125		742	971	1053	1041	1059	1189	1035	1130		5720	6994	6915	7184	7389	7499	7786	8089		5478	5690	5572	5678	5586	5752	5883	5762
	34.1974	314	177	194	167	138	134	134	106		731	933	1021	1074	1117	1110	1029	1121		5750	6927	6998	7343	7253	7098	7665	8057		5534	5725	5967	5643	5604	5918	6021	5669
	34.5654	359	166	172	117	134	120	107	115		762	953	963	1122	1091	1134	1097	1070		5705	6928	7170	7227	7120	7168	7514	8215		5444	5926	5770	5548	5750	5794	5853	5843
	34.9328	435	209	154	186	123	146	95	99		841	957	994	1055	1129	1126	1105	1103		5973	7143	6929	7415	7246	7211	7803	7974		5808	5820	5881	5804	5709	5909	5708	5931
	35.3005	334	176	154	148	128	134	104	114		796	938	942	1053	1149	1098	1109	1084		5952	6808	7064	7108	7257	7235	7562	8065		5601	5747	5696	5700	5735	5933	5800	5704
	35.6682	336	190	177	144	148	139	125	130		765	937	1032	1111	999	1044	1073	1074		5762	7051	7030	7147	7098	7206	8103	8125		5589	5884	5971	5672	5823	5820	5744	5883
	36.0362	291	176	165	114	142	125	127	106		791	1008	1005	1078	1113	1101	1119	1111		5851	6878	6937	7130	7419	7061	7931	8101		5522	5785	5930	5634	5646	5784	5991	5831
	36.4036	463	299	232	270	222	265	247	248		1124	1512	1388	1487	1510	1560	1386	1417		5756	7121	7011	7467	7147	7306	7869	8174		5368	5629	5781	5659	5601	5910	6008	5817
	36.7714	459	299	239	248	213	272	209	247		1034	1528	1409	1538	1466	1442	1368	1358		5832	16185	16437	16349	16246	16042	16539	16030		9303	13599	13590	13060	12933	12794	12979	12575
	37.1394	496	268	270	257	236	248	227	234		1078	1434	1398	1497	1508	1581	1357	1440		8845	16564	16514	16431	16041	16259	16924	15812		9433	14037	13567	12865	12943	12958	12969	12338
	37.5071	469	284	248	292	255	263	233	250		1123	1434	1420	1545	1465	1523	1517	1397		8977	16126	16452	16220	15986	16222	16826	16524		9437	13796	13821	12499	12759	12606	12911	12647
	37.8745	496	277	316	235	241	228	214	257		1152	1479	1340	1482	1553	1562	1420	1457		9198	16084	16101	16085	16492	15815	16955	15906		10334	14077	13441	12761	12462	12569	12754	12284
	38.2423	449	273	255	242	260	255	224	228		1058	1466	1543	1470	1440	1473	1397	1379		9212	16473	16075	16535	16075	15963	16038	16855		10087	13668	13384	12537	12468	12497	12632	12509
[truncated: 23 more columns]

## Sheet: Fig4F
Elen
lipid to protein ratio 50
H-transport using Manganese																																								Condition
																																								Mean	SEM	N
NORMALIZED DATA
		Elen65 LPR50																		Elen65 LPR50
		Concentrations Mn (uM)									With protein				No protein					Concentrations Mn (uM)									With protein				No protein
	Time norm (min)	50	50	50	50	400	400	400	400		0	0	0	0	400	400	400	400		50	50	50	50	400	400	400	400		0	0	0	0	400	400	400	400			Time (min)	Elen-ts & no substrate			No protein & 400 μM Mn2+			Elen-ts & 50 μM Mn2+			Elen-ts & 400 μM Mn2+
	-8.89383	143.473	156.498	128.28	121.106	135.199	141.616	119.837	121.593		134.028	137.685	121.598	117.554	110.475	107.81	108.153	112.067		161.547	153.839	156.826	159.567	147.858	142.21	134.592	141.508		159.891	165.522	155.897	153.508	113.834	160.018	153.754	160.112			-8.89383	143.21	6.38535	8	128.278	8.74462	8	147.642	5.4003	8	135.552
	-8.82565	138.086	152.321	128.087	117.582	131.916	137.904	114.317	114.427		133.245	130.67	116.989	117.688	110.971	108.642	109.22	113.367		163.008	147.605	150.535	151.706	141.849	140.814	132.151	138.123		161.326	165.647	153.797	157.881	109.887	159.069	157.844	157.04			-8.82565	142.155	7.00187	8	128.255	8.72027	8	143.616	5.2279	8	131.438
	-8.75752	133.793	148.019	123.55	115.886	130.321	136.288	117.106	116.204		127.978	127.414	118.078	115.657	109.444	102.903	107.587	110.025		157.52	143.474	149.982	148.792	138.678	139.214	131.314	136.248		160.016	161.613	153.965	153.127	113.441	157.723	154.894	155.697			-8.75752	139.731	6.82771	8	126.464	8.74329	8	140.127	5.08983	8	130.672
	-8.68952	132.129	148.804	126.599	117.164	127.866	131.456	111.004	114.062		125.063	130.985	117.483	116.171	110.484	105.853	106.068	112.221		152.538	145.518	148.368	150.842	140.488	139.214	130.038	136.684		155.392	156.028	150.737	154.498	109.307	154.027	153.967	154.135			-8.68952	138.295	6.23245	8	125.758	8.31439	8	140.245	4.65841	8	128.851
	-8.62127	134.648	142.128	122.895	110.929	123.44	137.968	109.032	113.097		126.74	126.471	112.862	110.422	111.097	106.288	105.898	110.343		149.288	144.457	145.271	149.175	136.086	141.458	127.736	134.455		152.249	148.516	149.989	150.158	112.515	153.608	151.656	152.197			-8.62127	134.676	6.2234	8	125.45	7.95755	8	137.349	4.87842	8	127.909
	-8.55315	135.884	144.805	123.713	111.085	123.19	135.28	112.147	112.815		123.276	124.206	110.229	108.795	108.568	106.817	107.993	110.824		150.328	142.631	147.579	145.781	137.886	134.608	125.095	137.14		151.964	148.799	147.275	149.016	111.655	150.596	150.186	150.812			-8.55315	132.945	6.47219	8	124.681	7.58742	8	137.726	4.82638	8	127.27
	-8.48503	135.979	142.86	120.857	110.463	119.797	128.224	107.958	110.144		120.016	118.827	111.444	111.364	110.465	106.874	105.775	105.643		146.507	142.448	144.192	145.319	138.807	137.711	126.291	131.931		149.858	147.677	144.438	149.429	111.168	148.555	146.576	147.001			-8.48503	131.632	6.25014	8	122.757	7.24511	8	136.078	4.69492	8	125.108
	-8.41707	135.535	137.861	119.488	112.709	121.173	124.672	104.679	110.685		119.06	118.229	112.609	108.673	109.59	104.718	103.029	111.508		150.272	139.805	145.052	144.15	134.951	136.401	127.656	128.638		150.632	147.213	147.342	146.459	111.617	148.367	150.591	147.688			-8.41707	131.277	6.40327	8	123.389	7.54461	8	135.609	4.59829	8	123.607
	-8.34878	136.233	136.433	120.842	107.119	117.717	124.336	103.174	110.379		116.458	120.887	109.406	108.404	110.027	108.567	105.945	112.211		146.32	140.796	143.841	142.073	133.001	134.994	123.719	131.779		150.598	146.046	146.292	143.99	111.084	145.554	148.599	144.23			-8.34878	130.26	6.40772	8	123.277	6.73476	8	134.207	4.7552	8	122.388
	-8.28067	134.743	139.111	116.736	106.725	115.512	125.264	103.769	107.731		118.197	118.701	105.634	107.988	107.265	105.144	107.153	113.877		145.13	137.518	142.2	139.569	133.515	133.888	125.533	132.225		149.653	144.052	148.593	143.533	107.38	145.046	147.886	146.605			-8.28067	129.544	6.62258	8	122.544	7.0782	8	132.717	4.79955	8	122.18
	-8.21253	127.646	132.31	113.062	107.394	115.653	124.32	102.345	108.167		118.323	119.377	107.963	108.049	106.39	105.635	104.643	109.852		141.6	137.997	141.604	139.874	133.355	133.265	125.115	128.293		147.967	146.102	146.985	145.274	107.371	146.558	146.278	144.699			-8.21253	130.005	6.43726	8	121.428	7.1707	8	130.186	4.70411	8	121.314
	-8.14443	120.421	135.88	114.668	106.677	117.733	122.592	103.162	106.249		118.715	117.317	106.267	105.639	107.207	105.257	102.218	110.709		144.044	135.649	138.84	138.121	137.264	134.769	125.992	130.594		147.352	145.819	142.238	143.99	111.393	147.187	144.169	144.845			-8.14443	128.417	6.43892	8	121.623	7.04206	8	129.288	4.77067	8	122.294
	-8.0763	118.584	133.613	119.652	102.078	113.964	123.632	102.707	105.919		114.781	116.625	105.115	105.7	107.148	105.9	103.407	110.073		142.976	134.571	137.401	135.302	134.265	132.847	123.52	127.341		144.152	144.686	144.673	142.87	106.847	144.693	146.757	141.783			-8.0763	127.325	6.49166	8	120.826	6.95082	8	128.022	4.764	8	120.524
	-8.00817	116.984	138.004	115.724	103.619	113.182	118.384	102.684	104.754		118.245	116.357	102.722	102.446	103.083	105.295	102.161	108.349		141.45	133.293	139.393	138.365	135.711	134.779	121.806	128.901		146.02	144.822	143.132	139.671	107.904	145.741	146.501	140.7			-8.00817	126.677	6.65685	8	119.967	7.19141	8	128.354	5.02084	8	120.025
	-7.94023	120.453	130.525	115.977	105.459	114.668	120.208	102.999	103.095		116.348	118.15	103.266	102.74	106.818	104.189	104.954	106.385		142.386	134.78	137.507	138.487	129.092	133.845	124.307	128.527		143.184	140.505	145.667	139.704	106.201	145.598	145.383	141.96			-7.94023	126.196	6.39838	8	120.186	7.08045	8	128.197	4.56882	8	119.593
	-7.87192	118.346	131.774	113.062	102.114	117.404	120.4	99.9883	102.142		119.216	115.225	104.38	102.434	106.088	102.137	102.699	107.232		140.841	133.032	134.436	137.868	125.857	133.158	123.111	128.223		144.255	146.782	143.143	142.075	107.043	144.715	144.073	139.263			-7.87192	127.189	6.66948	8	119.156	6.9418	8	126.434	4.83673	8	118.785
	-7.80378	119.629	133.47	115.115	104.36	112.697	120.176	102.695	104.778		117.382	116.153	104.431	103.78	106.701	102.014	102.52	108.869		139.886	133.119	135.129	134.91	133.001	132.664	125.862	127.422		142.888	144.539	145.455	142.761	108.203	143.965	145.947	140.898			-7.80378	127.174	6.55672	8	119.89	7.01171	8	126.952	4.3959	8	119.912
	-7.73593	119.867	131.56	115.323	104.838	114.902	125.968	98.4364	102.142		117.539	113.306	103.317	98.8869	104.688	102.288	102.208	106.914		142.199	132.049	136.866	133.409	130.677	133.899	123.66	127.756		141.897	145.049	142.741	137.594	107.156	145.09	144.861	140.439			-7.73593	125.041	6.68855	8	119.206	7.148	8	127.014	4.42017	8	119.68
	-7.66765	114.084	127.419	116.364	101.003	113.088	120.304	100.28	101.471		116.975	115.068	100.316	102.373	108.539	102.175	102.538	105.239		141.365	133.954	135.129	134.613	135.347	131.601	124.557	126.125		139.642	147.167	143.187	139.943	106.968	137.268	143.764	141.273			-7.66765	125.584	6.73671	8	118.471	6.59876	8	125.491	4.84858	8	119.097
	-7.59942	119.883	137.13	116.587	101.147	113.855	118.688	100.385	103.495		113.041	113.511	101.975	101.872	105.33	102.345	101.812	106.154		140.551	131.223	134.778	134.569	132.808	129.164	121.497	125.638		138.731	141.967	144.963	140.466	108.091	140.766	141.751	139.2			-7.59942	124.566	6.61807	8	118.181	6.59786	8	126.983	4.72329	8	118.191
	-7.53157	118.093	135.362	114.594	102.747	111.853	117.824	98.9615	100.412		116.834	116.216	101.734	100.685	105.446	101.948	103.124	104.257		142.152	132.128	132.418	129.011	128.342	134.071	120.062	123.247		145.758	140.075	146.348	134.407	104.639	140.258	140.686	139.586			-7.53157	125.257	6.65232	8	117.493	6.65196	8	125.813	4.56967	8	116.846
	-7.46318	118.536	133.684	113.389	100.311	111.228	119.2	99.3466	105.978		114.812	114.643	99.1898	99.6697	104.075	101.56	103.775	106.462		141.852	128.945	130.497	129.073	131.877	130.903	117.939	123.824		141.282	140.664	138.821	138.018	105.565	140.391	138.779	137.419			-7.46318	123.387	6.50412	8	117.253	6.3528	8	124.536	4.6411	8	117.537
	-7.39517	121.8	130.793	115.754	102.855	112.213	117.968	97.6546	97.8701		113.981	113.511	101.013	100.122	105.553	101.154	101.557	105.277		138.79	131.371	133.076	131.533	128.074	131.569	120.151	123.51		140.269	138.069	138.218	138.453	103.554	138.68	140.729	137.815			-7.39517	122.954	6.2305	8	116.79	6.55311	8	125.746	4.1272	8	116.126
	-7.32693	120.406	130.453	116.201	102.186	112.979	117.408	95.4492	101.059		114.013	111.545	100.266	100.563	102.879	101.409	101.529	103.322		138.781	129.189	134.989	131.655	124.122	130.28	118.627	124.412		139.608	142.477	141.054	138.964	103.115	141.979	137.097	137.169			-7.32693	123.561	6.63561	8	116.062	6.66726	8	125.482	4.22243	8	115.542
	-7.2588	116.587	131.667	113.895	101.171	113.964	118.304	96.8261	98.2819		115.204	112.85	101.253	98.3242	102.179	98.1373	100.67	103.38		137.732	130.858	130.374	126.01	128.578	125.309	117.172	125.101		140.963	141.48	142.294	137.735	106.239	138.736	139.493	136.815			-7.2588	123.763	6.67421	8	115.706	6.68296	8	123.537	4.25855	8	115.442
	-7.191	117.95	128.543	113.285	99.4028	108.679	120.832	98.1564	98.5173		110.251	114.517	98.3542	99.2538	102.451	100.785	99.8962	103.245		133.986	128.893	130.383	129.901	126.467	127.327	120.122	121.017		143.81	138.183	139.189	138.181	104.714	140.898	138.471	136.117			-7.191	122.717	6.76296	8	115.822	6.6732	8	122.793	4.15042	8	115.14
	-7.12282	115.748	129.436	112.377	99.0803	111.274	117.344	96.6394	99.1763		111.63	110.192	99.3923	97.945	103.093	102.127	98.9148	102.138		138.977	130.05	131.383	128.418	127.571	132.03	118.378	125.334		137.262	140.12	139.87	135.853	103.526	138.559	141.176	136.409			-7.12282	121.533	6.55678	8	115.743	6.75784	8	123.184	4.59685	8	115.968
	-7.0547	118.457	131.15	110.964	99.57	109.273	119.136	96.2894	100.2		112.962	112.787	99.2784	99.6086	102.383	98.7992	99.3866	104.854		138.106	128.598	131.479	126.944	127.539	128.573	117.202	123.997		140.519	137.004	136.844	136.419	101.45	135.68	139.631	136.347			-7.0547	121.928	6.24	8	114.816	6.60325	8	123.158	4.48742	8	115.276
	-6.98657	118.251	128.026	109.476	98.4114	107.772	117.472	97.6196	99.7529		107.665	110.9	95.645	99.6697	100.749	100.889	99.4149	103.043		136.786	127.067	130.181	124.335	125.407	127.639	119.185	119.71		138.811	138.568	139.044	135.832	103.096	138.868	137.576	135.951			-6.98657	120.767	6.74629	8	114.948	6.61175	8	121.567	4.38911	8	114.32
	-6.91862	114.48	128.9	112.452	97.1572	110.211	117.664	93.6639	98.2584		112.806	111.041	101.013	95.9266	102.344	100.964	97.2162	100.212		135.194	129.876	132.523	127.476	126.874	129.475	116.643	123.125		139.472	137.322	138.966	134.222	101.31	136.088	140.611	135.618			-6.91862	121.346	6.4069	8	114.295	6.81557	8	122.257	4.60743	8	114.489
	-6.85032	112.801	126.865	110.399	97.7186	109.977	115.04	95.741	99.2822		108.307	111.938	99.6202	99.1193	101.692	101.04	100.075	100.578		136.945	129.971	128.795	127.293	123.704	128.573	120.999	122.771		136.226	137.242	138.162	133.025	102.245	136.584	135.329	134.024			-6.85032	120.455	6.14044	8	113.946	6.26437	8	121.348	4.61006	8	114.511
	-6.78218	114.924	129.115	109.179	99.8328	108.538	115.248	94.2124	101.059		112.32	111.057	97.9364	98.6422	101.653	97.7023	99.4904	101.05		136.421	128.215	130.453	128.087	124.979	125.813	116.594	120.632		141.578	138.126	138.541	134.711	101.141	140.004	136.958	136.17			-6.78218	121.614	6.56759	8	114.271	6.88664	8	122.028	4.45519	8	113.384
	-6.71407	114.465	129.561	110.22	96.1658	110.539	115.728	95.1925	97.67		110.815	109.217	96.4426	98.263	102.636	97.3052	100.33	102.369		136.711	128.824	128.005	126.647	120.758	124.997	116.065	121.656		141.578	137.254	137.67	134.853	100.589	133.208	136.575	129.254			-6.71407	120.762	6.70768	8	112.783	5.98999	8	121.325	4.70012	8	112.826
	-6.6462	115.748	125.919	113.448	98.6861	109.304	116.272	94.3057	98.0231		107.868	108.635	96.6451	97.2722	103.744	97.2107	97.6408	99.3451		133.939	129.823	130.207	123.087	123.575	129.249	116.295	119.852		138.207	137.707	139.96	132.438	101.412	134.996	136.063	132.868			-6.6462	119.842	6.72984	8	112.91	6.4115	8	121.357	4.09725	8	113.36
	-6.57808	113.387	129.329	115.739	96.2494	109.335	115.92	93.769	96.5874		110.47	112.63	97.6706	97.2722	101.469	98.5628	96.3103	100.27		137.132	128.58	131.962	123.043	124.229	127.209	117.132	121.119		138.971	138.964	135.347	134.222	100.991	135.647	138.545	133.378			-6.57808	120.693	6.42786	8	113.147	6.69054	8	121.928	4.6344	8	113.163
	-6.51022	113.546	128.615	113.835	97.6111	107.647	115.488	93.2439	96.7404		110.486	110.727	95.2652	96.8563	101.089	97.674	97.2917	97.4769		135.222	125.624	127.847	123.951	126.082	127.65	116.205	120.744		135.827	136.71	138.843	134.091	100.963	133.694	134.796	135.055			-6.51022	119.851	6.55624	8	112.255	6.53922	8	120.781	4.20625	8	112.975
	-6.44183	113.387	137.255	111.574	97.5633	107.24	112.592	97.0945	95.9402		110.345	112.032	95.2779	96.0489	101.216	97.8064	97.2539	99.1814		135.081	126.824	134.138	122.31	120.137	124.085	118.667	119.102		136.533	137.39	138.474	134.842	101.244	136.893	133.358	131.681			-6.44183	120.118	6.65309	8	112.329	6.37732	8	122.267	4.91714	8	111.857
	-6.37372	109.949	137.844	111.708	98.1725	105.082	116.176	93.3372	97.1052		109.201	111.277	97.2908	98.4343	102.47	99.1679	95.3477	99.297		131.326	125.685	127.715	128.209	122.943	128.068	116.135	121.23		136.818	137.446	141.434	133.373	98.7747	137.478	136.862	132.431			-6.37372	120.659	6.5404	8	112.729	6.74732	8	121.326	4.70192	8	112.51
	-6.30585	113.15	132.685	110.711	96.118	109.773	117.936	92.2287	97.8348		108.981	112.645	94.6069	98.3119	101.274	99.1207	100.151	98.8444		135.231	126.685	128.944	123.218	122.386	121.11	116.614	119.791		133.96	133.469	135.694	136.006	101.889	136.849	134.242	131.993			-6.30585	119.209	6.21698	8	113.046	6.26754	8	120.843	4.67861	8	112.209
	-6.23773	115.035	134.291	114.847	96.7869	107.303	115.536	96.2194	98.3526		108.84	109.295	97.7972	95.5107	103.239	101.522	94.4041	100.973		138.631	125.772	131.497	124.71	121.894	128.283	116.075	121.19		136.727	134.806	136.621	133.754	98.2883	138.537	134.871	131.816			-6.23773	119.169	6.39577	8	112.956	6.57162	8	122.696	4.76393	8	113.107
	-6.1696	111.882	134.845	111.544	96.6794	105.817	116.976	92.8238	97.2935		109.107	112.866	96.0375	96.5015	100.447	97.4092	97.5842	98.074		132.319	127.467	128.172	125.958	121.508	125.62	115.836	119.629		136.032	137.163	135.202	132.068	100.159	136.86	135.02	133.795			-6.1696	119.372	6.29786	8	112.419	6.6947	8	121.108	4.63213	8	111.938
	-6.10147	113.657	134.381	111.276	96.3211	104.801	112.336	93.2089	96.8345		110.157	109.248	94.8474	94.9969	101.546	95.5276	97.3483	97.8236		135.671	126.085	128.777	124.675	118.83	125.781	113.026	120.511		137.661	135.52	136.576	129.838	99.9906	137.323	134.583	130.192			-6.10147	118.605	6.51792	8	111.792	6.57694	8	121.355	4.72578	8	110.666
	-6.03335	111.185	138.54	108.465	98.2203	105.254	114.112	96.4877	95.7872		108.558	113.495	93.2143	96.5627	102.072	96.4826	96.9142	97.8717		135.409	125.763	128.926	125.888	123.597	126.34	114.172	117.329		137.661	134.976	136.107	133.634	101.001	134.874	134.828	130.9			-6.03335	119.276	6.57014	8	111.868	6.39328	8	121.549	4.99042	8	111.635
	-5.96523	110.694	138.95	109.685	96.3569	108.632	113.888	94.8075	95.9285		107.68	109.814	92.7712	95.5596	101.945	99.8487	96.7727	101.223		136.58	125.867	129.356	127.057	124.411	126.393	113.195	117.278		138.003	134.908	134.7	132.275	99.1769	136.231	134.232	130.9			-5.96523	118.214	6.6572	8	112.541	6.2642	8	121.818	5.22926	8	111.817
	-5.89712	113.482	141.931	110.696	98.7817	107.678	110.912	91.7853	94.434		110.987	112.095	94.1385	97.37	101.264	98.09	97.9428	98.1414		133.031	127.441	128.452	121.927	124.207	125.04	115.408	118.464		135.019	135.067	135.56	131.535	98.8682	135.812	135.584	130.546			-5.89712	118.971	6.18741	8	112.031	6.46144	8	121.968	4.87265	8	110.991
	-5.82898	112.991	141.824	107.483	99.7969	106.333	114.048	94.224	95.6813		107.9	107.943	91.6065	96.2446	102.295	96.4353	97.8768	97.5636		133.836	127.441	127.865	123.104	124.829	125.867	114.152	119.051		135.269	136.109	133.784	134.483	98.8121	135.282	134.7	130.087			-5.82898	117.917	6.70821	8	111.632	6.41104	8	121.793	4.96928	8	111.773
	-5.76085	112.072	139.95	108.331	95.1624	105.035	115.936	92.1354	96.0461		108.966	111.261	94.2651	96.2324	102.509	95.4614	97.3577	96.745		129.163	126.676	127.724	126.246	121.262	122.077	112.338	117.957		134.256	135.554	136.285	129.958	100.851	135.36	134.466	129.036			-5.76085	118.347	6.28629	8	111.473	6.37152	8	120.665	5.06665	8	110.348
	-5.69273	114.734	139.165	108.926	99.4147	103.018	114.16	93.2089	95.1636		107.884	108.666	91.4166	94.6911	100.914	97.135	95.4421	96.6198		131.925	124.607	127.092	120.888	117.62	123.226	115.059	116.69		139.005	133.243	133.605	133.275	98.8589	132.866	132.549	135.003			-5.69273	117.723	6.7997	8	111.174	6.55825	8	120.844	4.5321	8	109.768
	-5.62475	113.181	138.111	107.944	98.5786	105.786	114.064	93.7806	94.6693		107.727	107.062	94.6955	94.6055	104.347	94.809	95.9706	95.5027		135.952	125.946	128.259	120.26	119.848	124.171	112.308	119.964		132.741	135.769	133.672	131.198	99.7475	134.058	135.137	132.212			-5.62475	117.184	6.35706	8	111.473	6.62987	8	121.029	4.87043	8	110.574
	-5.55648	113.435	137.076	107.602	95.7238	102.737	109.776	93.874	94.6223		109.279	108.981	94.1385	97.1621	101.741	94.5348	96.9425	99.1814		131.991	126.928	129.417	125.321	122.761	124.385	113.215	114.988		134.313	132.563	134.264	133.025	99.4481	134.962	134.679	134.337			-5.55648	117.966	6.16649	8	111.978	6.68073	8	120.937	4.96325	8	109.545
	-5.48837	110.71	135.327	108.777	94.9236	104.613	111.488	93.1505	92.2217		109.013	108.997	92.594	98.0183	100.963	94.7144	94.7721	99.5666		132.946	124.467	127.18	119.073	120.801	121.389	114.072	118.899		134.632	135.01	133.907	130.066	98.5034	133.109	133.422	129.754			-5.48837	117.78	6.22603	8	110.601	6.35019	8	119.176	4.8376	8	109.579
	-5.42023	111.882	134.256	110.309	96.6436	105.426	111.344	93.4539	97.2229		110	108.855	95.4045	93.7615	99.6401	93.6365	95.6591	98.9022		132.225	123.963	126.426	122.799	119.559	121.121	113.943	118.95		134.871	131.826	135.157	133.961	97.7551	135.007	135.467	126.849			-5.42023	117.98	6.36761	8	110.364	6.56092	8	119.813	4.47724	8	110.127
	-5.35212	113.371	133.934	108.673	98.9369	106.067	112.128	94.6091	92.2335		107.069	107.408	90.4165	92.4648	100.126	92.6532	95.5837	97.8043		134.744	126.146	126.847	125.6	119.634	124.847	110.893	117.501		132.65	135.203	134.878	132.84	95.1361	136.264	138.076	127.39			-5.35212	116.616	6.87246	8	110.379	7.01436	8	121.032	4.50187	8	109.739
	-5.28398	115.621	134.273	108.048	96.1419	103.362	110.576	94.5158	96.4462		107.837	107.172	92.6953	97.6391	102.791	95.6127	96.8482	98.0643		134.604	128.754	127.733	121.281	121.476	122.603	110.793	119.122		135.896	134.115	136.096	128.054	100.337	134.665	133.699	129.89			-5.28398	117.438	6.38271	8	111.488	6.29006	8	120.807	4.78296	8	109.862
	-5.21587	111.264	135.719	109.566	94.2785	107.146	111.936	92.4737	95.8932		108.135	105.741	93.265	94.9113	99.1636	94.9414	96.1499	97.7947		132.281	122.633	128.4	119.073	121.937	123.741	111.551	118.433		138.492	133.299	133.773	131.209	95.4167	133.517	133.656	128.515			-5.21587	117.353	6.63649	8	109.894	6.48219	8	119.152	4.85008	8	110.389
	-5.14788	114.702	136.451	103.124	94.7444	104.973	114.336	93.3839	96.0932		107.759	108.257	95.2399	93.2232	100.331	94.5726	95.7913	96.562		129.434	125.363	128.031	122.214	118.745	124.149	112.976	116.295		133.003	132.948	135.47	129.338	98.8121	130.13	131.611	126.89			-5.14788	116.905	6.2741	8	109.338	5.96596	8	119.258	5.00736	8	110.119
	-5.07962	109.664	135.523	110.071	96.4644	103.409	110.224	94.224	93.5985		109.216	110.727	93.6068	94.6911	100.895	93.1259	95.0175	100.549		130.568	125.024	126.154	117.494	120.051	125.373	112.946	120.409		132.65	136.619	133.639	130.567	98.9243	132.91	133.806	128.973			-5.07962	117.714	6.31257	8	110.525	6.34354	8	118.87	4.57311	8	110.029
	-5.0115	112.516	135.559	105.921	97.1452	104.582	110.576	90.9218	97.9172		106.912	108.713	90.7963	94.0795	98.2591	94.4213	97.6503	97.6213		128.086	122.172	126.838	121.351	119.473	121.883	111.122	115.991		135.884	131.317	134.175	132.046	95.7815	130.108	132.219	127.994			-5.0115	116.74	6.63434	8	109.257	6.13222	8	118.698	4.47966	8	109.058
	-4.94337	111.66	130.507	109.685	94.6249	102.471	109.408	91.3302	91.4215		105.219	108.493	92.1636	95.5963	98.5217	93.9675	95.9045	99.7207		129.706	125.606	124.574	123.288	118.616	120.928	112.169	119.477		132.832	133.537	132.656	132.285	96.5298	133.683	136.308	127.609			-4.94337	116.598	6.39156	8	110.281	6.59685	8	118.706	4.37981	8	108.227
	-4.87537	110.599	133.506	105.594	96.3091	102.94	113.44	91.4702	94.6458		107.085	107.99	93.0118	93.052	98.8913	95.0548	94.64	98.2184		129.181	123.485	129.338	122.084	119.73	121.647	111.351	118.008		134.028	133.787	132.31	130.686	96.7543	130.737	134.572	128.859			-4.87537	116.494	6.43627	8	109.716	6.38885	8	118.762	4.65856	8	109.154
	-4.80713	112.579	130.614	106.486	94.9116	103.894	112.064	92.217	94.3634		106.771	109.185	91.8977	93.4801	96.9364	94.1471	95.5648	98.777		128.91	124.407	123.495	121.831	121.412	124.353	111.282	115.211		130.133	130.716	134.029	130.86	96.8291	133.837	132.57	130.077			-4.80713	115.884	6.24182	8	109.842	6.56055	8	117.904	4.34867	8	109.349
	-4.73925	110.092	128.758	107.885	92.9049	102.267	110.48	93.2439	94.5164		106.583	106.952	94.6449	93.7859	99.6693	92.3506	95.6875	96.562		129.575	124.085	124.188	122.633	120.051	123.065	110.714	114.349		134.62	132.971	132.544	126.172	95.267	129.203	133.294	130.577			-4.73925	116.034	6.17012	8	109.076	6.47619	8	117.515	4.51037	8	108.586
	-4.67102	112.421	131.721	106.427	94.5294	106.802	108.784	90.9685	96.4462		106.818	108.588	93.8473	95.2661	100.214	93.2205	93.5076	98.228		128.695	122.528	124.066	121.429	118.273	121.325	110.654	114.816		133.094	133.73	131.584	131.306	97.6148	132.502	129.545	131.066			-4.67102	116.779	6.17993	8	109.487	6.36865	8	117.727	4.40583	8	108.509
	-4.60275	110.868	129.597	104.463	94.6966	106.88	112.352	91.8203	93.9868		106.411	110.035	91.9863	95.7798	97.4032	94.5915	94.7155	97.6117		130.436	124.885	125.689	119.257	122.879	124.224	114.032	114.005		133.595	131.407	131.896	131.491	95.3232	133.617	134.157	130.171			-4.60275	116.575	6.19629	8	109.699	6.74276	8	117.486	4.57534	8	110.023
	-4.53463	107.541	130.364	107.096	94.4816	100.078	108.928	89.79	93.0572		104.937	110.585	91.6192	92.3058	99.0663	95.0454	95.7913	96.3694		128.891	121.642	126.785	118.332	120.094	120.412	111.282	115.17		135.372	135.486	134.443	128.935	95.7815	133.021	130.632	124.943			-4.53463	116.71	6.76906	8	108.831	6.12519	8	116.892	4.49923	8	107.351
	-4.4665	112.437	132.221	107.096	95.5208	101.267	108.288	89.1832	94.5281		107.367	105.3	90.4292	92.526	100.311	92.379	94.9703	97.9584		128.535	122.52	123.574	121.002	121.808	119.22	113.554	112.343		135.713	132.302	132.321	129.087	96.3614	131.355	132.677	127.442			-4.4665	115.631	6.66126	8	109.182	6.31099	8	117.863	4.28607	8	107.524
	-4.39855	112.532	134.273	108.167	94.6608	104.316	107.776	89.3582	93.0807		104.561	108.997	89.6189	93.4924	100.156	94.1471	95.4987	98.7481		128.02	123.546	123.144	119.082	119.666	120.037	110.753	115.079		135.258	133.186	132.421	127.129	94.182	132.701	134.796	132.045			-4.39855	115.583	6.60196	8	110.284	6.74914	8	117.928	4.42172	8	107.508
	-4.33052	111.027	133.631	107.661	95.4849	104.253	109.888	88.203	93.1043		106.16	110.286	90.4292	93.8349	98.3953	93.5136	92.8282	94.0485		129.875	123.137	122.118	117.721	118.295	120.767	112.856	117.734		131.739	133.526	135.001	130.599	95.8189	129.788	132.229	127.744			-4.33052	116.447	6.54939	8	108.046	6.44608	8	117.582	4.41142	8	108.138
	-4.26238	110.757	132.471	107.959	95.3655	101.97	109.456	90.1517	93.0807		104.718	109.075	92.6193	94.1651	99.4748	94.0998	93.4887	98.8155		127.543	120.763	122.1	117.974	119.623	119.822	110.494	116.315		131.397	132.019	131.852	127.39	95.9405	130.428	130.291	129.806			-4.26238	115.404	6.08059	8	109.043	6.2292	8	116.867	4.18379	8	107.614
	-3.1155	116.017	133.792	107.929	105.817	114.246	115.92	104.201	101.883		112.163	116.735	104.57	104.636	103.715	102.26	101.293	103.139		136.842	128.45	133.945	124.754	124.036	123.419	117.381	122.912		126.295	135.894	127.92	128.511	104.986	129.887	133.379	123.433			-3.1155	119.591	4.1668	8	112.762	4.83473	8	123.443	4.28909	8	115.5
	-3.04743	113.134	126.705	105.222	102.807	113.948	113.104	103.174	104.072		112.21	115.256	103.228	103.437	107.644	102.827	102.161	103.602		131.925	128.641	132.471	124.082	123.393	126.232	116.344	123.075		131.91	132.722	126.513	128.315	103.405	127.681	130.759	122.974			-3.04743	119.199	4.32787	8	112.632	4.34942	8	120.623	4.20894	8	115.418
	-2.97935	117.982	131.614	107.825	101.804	112.885	114.64	100.782	102.212		112.398	114.124	105.545	105.602	105.592	103.082	99.8207	104.314		134.913	129.676	132.33	129.718	126.639	124.385	115.168	123.075		130.031	134.126	128.345	129.185	102.376	126.666	129.673	125.765			-2.97935	119.92	4.14617	8	112.161	4.50657	8	123.233	4.42634	8	114.973
	-2.91123	117.174	128.722	102.455	101.983	114.808	113.344	99.3699	101.718		108.746	110.554	101.962	104.061	106.127	103.319	101.161	103.823		130.596	130.041	131.277	129.64	122.054	123.72	116.823	121.575		134.051	134.364	129.506	126.792	102.264	126.324	130.056	122.547			-2.91123	118.755	4.86082	8	111.953	4.29168	8	121.486	4.49613	8	114.176
	-2.84312	116.698	135.22	100.64	99.1997	109.992	112.464	104.947	99.9765		105.972	114.061	102	104.318	107.003	104.652	98.4901	105.065		132.066	129.171	129.856	126.778	120.469	123.709	116.883	122.315		133.208	131.328	131.427	126.172	101.356	124.757	130.387	127.973			-2.84312	118.561	4.7375	8	112.46	4.58477	8	121.204	5.01997	8	113.844
	-2.77512	110.139	138.933	101.681	103.368	109.554	110.944	101.657	103.401		108.636	111.796	103.519	104.844	102.568	100.615	99.8301	104.574		133.302	125.937	129.453	129.256	122.579	123.516	116.065	122.902		133.367	134.478	129.741	126.749	102.937	129.943	128.054	126.588			-2.77512	119.141	4.66861	8	111.889	4.81139	8	121.509	5.06541	8	113.827
	-2.70685	111.138	145.091	99.7322	102.867	109.492	109.728	101.855	104.048		110.564	110.428	104.038	103.976	103.842	103.309	98.5939	103.534		132.759	127.528	132.269	126.097	121.605	124.729	117.481	121.544		133.333	130.693	132.544	126.672	102.507	126.578	130.866	127.265			-2.70685	119.031	4.58785	8	112.062	4.79029	8	122.185	5.6401	8	113.81
	-2.63875	109.632	145.537	100.298	102.735	105.035	108.944	101.867	102.695		108.135	108.43	100.57	103.914	108.296	103.498	100.953	103.419		128.545	128.676	126.908	124.57	123.747	122.893	117.012	120.268		134.404	133.877	127.786	125.03	103.433	126.291	130.546	126.661			-2.63875	117.768	4.92272	8	112.887	4.45596	8	120.863	5.43934	8	112.808
	-2.57062	109.395	140.396	102.693	99.5103	102.408	106.416	101.832	98.176		106.614	109.909	102.051	107.242	107.401	103.498	98.7355	103.428		132.469	123.285	130.032	128.584	123.147	125.921	114.75	123.672		134.506	135.395	131.908	125.552	103.947	128.111	128.619	124.193			-2.57062	119.147	4.96452	8	112.242	4.41515	8	120.795	5.31736	8	112.04
	-2.50263	106.622	141.021	98.5719	103.882	101.517	108.592	102.229	103.589		107.288	109.39	109.153	105.505	106.02	101.22	99.9339	103.274		130.661	125.372	131.514	124.5	124.968	124.052	116.045	118.697		135.873	133.821	128.133	125.552	101.085	125.188	127.17	125.328			-2.50263	119.339	4.50865	8	111.152	4.36866	8	120.268	5.40268	8	112.461
	-2.43437	109.68	139.879	96.9801	99.57	106.192	106.08	101.832	102.636		107.1	105.678	103.089	105.578	103.978	105.115	101.161	104.074		129.453	125.363	131.146	122.869	123.008	124.879	116.623	121.767		131.09	134.976	129.54	124.16	106.08	124.835	127.479	126.63			-2.43437	117.651	4.77523	8	112.419	4.10591	8	119.367	5.5038	8	112.877
	-2.36625	112.183	137.737	97.5602	99.9761	101.986	101.456	100.467	102.495		109.953	105.411	101.038	100.489	107.674	105.219	97.9994	102.716		129.247	126.885	131.769	124.239	123.95	121.228	116.454	120.531		131.557	131.736	129.082	122.071	104.116	123.996	129.726	122.891			-2.36625	116.417	4.83547	8	111.792	4.19496	8	119.949	5.2941	8	111.071
	-2.29832	112.342	140.503	93.2163	99.8447	103.159	101.664	98.5181	100.718		106.803	103.806	103.532	103.523	105.106	101.617	102.784	104.112		133.433	128.354	126.601	125.242	125.096	123.999	114.73	118.403		132.331	130.705	130.433	125.693	100.776	126.169	128.459	124.599			-2.29832	117.103	4.85484	8	111.703	4.34692	8	119.942	5.86136	8	110.786
	-2.23025	110.71	133.881	94.6742	100.167	103.862	105.824	97.9813	102.436		104.263	103.885	100.912	104.673	105.417	103.253	101.746	100.703		130.455	127.119	127.838	121.359	122.14	125.523	116.305	120.703		133.128	130.829	129.998	124.475	103.526	126.964	130.163	125.828			-2.23025	116.52	5.03449	8	112.2	4.56917	8	118.276	5.19823	8	111.847
	-2.16213	116.683	136.237	93.4246	100.8	99.0618	101.568	99.5799	100.482		101.442	102.658	103.874	101.713	103.637	101.399	99.3111	103.544		130.109	126.285	126.917	124.431	120.983	122.742	113.614	119.203		135.748	135.554	130.444	125.965	103.704	123.93	126.393	126.359			-2.16213	117.175	5.68575	8	111.035	4.29251	8	119.361	5.27023	8	109.654
	-2.094	115.225	133.702	91.3865	100.227	99.2651	103.344	98.8565	104.942		99.232	100.362	100.253	101.651	104.62	101.182	99.5093	102.966		130.277	123.859	128.031	120.618	122.461	123.419	116.324	122.122		130.76	135.407	129.998	123.529	102.254	124.316	130.142	125.057			-2.094	115.149	5.70223	8	111.256	4.53356	8	117.916	5.29639	8	111.342
	-2.026	111.581	130.935	91.8923	102.484	100.422	100.208	100.198	101.012		98.8715	105.237	102.367	104.697	107.995	101.314	100.425	102.003		131.167	124.085	127.926	123.279	121.112	122.506	117.042	117.683		128.96	130.399	128.468	125.639	101.16	125.508	127.82	123.37			-2.026	115.58	4.90091	8	111.199	4.30641	8	117.919	5.1193	8	110.023
	-1.95802	111.629	131.739	93.9006	100	98.749	96.528	97.7946	102.083		100.016	100.047	97.2022	102.214	106.409	103.782	100.878	102.706		130.493	124.424	128.382	124.335	125.032	121.98	116.753	120.632		130.634	130.988	134.208	123.464	101.665	125.927	127.958	123.974			-1.95802	114.847	5.7768	8	111.662	4.24006	8	118.113	5.13962	8	109.944
	-1.88963	113.102	126.098	90.8807	101.314	98.9054	99.168	96.6278	98.9174		96.4107	100.173	102.519	102.74	105.456	103.432	101.18	102.417		126.887	121.329	128.496	121.857	123.265	122.002	113.992	119.031		130.737	131.169	128.479	125.846	100.973	124.415	128.15	123.068			-1.88963	114.759	5.47628	8	111.136	4.17954	8	116.245	4.80684	8	108.989
	-1.82167	113.72	128.686	92.2345	98.6144	95.1525	96.56	99.7083	99.1057		94.5925	99.481	108.951	102.495	106.944	102.099	100.217	104.786		127.149	124.728	127.601	120.103	121.797	120.101	115.308	117.44		134.404	129.424	129.305	126.107	101.487	126.335	125.764	129.525			-1.82167	115.595	5.60614	8	112.145	4.48588	8	116.605	4.96809	8	108.147
	-1.75338	112.738	131.757	90.6129	101.409	95.4652	94.992	101.097	105.154		94.232	101.541	102.937	103.376	106.166	102.496	99.7546	102.205		127.131	124.407	124.539	124.378	121.53	123.15	117.61	118.322		133.595	128.416	129.216	126.27	102.516	126.765	127.926	122.62			-1.75338	114.948	5.58687	8	111.306	4.31108	8	117.121	5.07781	8	109.665
	-1.68553	108.064	133.542	89.3484	101.362	95.7467	96.96	98.0747	100.53		96.9436	94.2749	102.215	103.645	105.621	103.139	98.8393	100.539		126.606	124.633	124.952	123.453	122.108	126.243	113.534	116.721		132.468	132.302	129.462	126.042	100.823	125.894	131.846	125.807			-1.68553	114.669	5.95011	8	111.564	4.86363	8	116.495	5.37191	8	108.74
	-1.61728	108.967	131.614	87.4442	99.5342	98.1861	96.288	99.1715	97.623		94.9843	98.0497	103.051	103.254	106.458	101.248	97.2068	101.984		127.318	122.668	123.995	119.37	121.208	121.379	112.956	119.264		129.962	129.209	130.065	124.638	101.908	123.135	126.212	122.141			-1.61728	114.152	5.52358	8	110.037	4.15181	8	115.114	5.38078	8	108.259
	-1.54902	107.605	130.15	90.1815	100.299	94.136	95.216	97.4329	99.1998		96.5987	98.3643	100.912	100.465	104.065	101.693	97.3672	101.387		127.065	122.555	126.303	120.923	120.159	126.146	113.076	119.913		135.611	131.838	128.222	125.987	103.723	129.281	128.182	121.839			-1.54902	114.75	6.01853	8	110.942	4.65374	8	115.635	5.13835	8	108.16
	-1.4809	109.981	134.845	89.9286	97.0139	97.1384	94.48	99.6033	95.799		94.0125	96.5083	98.9113	101.615	105.145	100.7	99.8018	101.165		128.179	122.789	125.697	118.724	123.34	120.305	113.992	116.913		130.167	129.889	129.674	125.356	103.835	126.655	129.556	123.964			-1.4809	113.267	5.93221	8	111.353	4.57145	8	115.895	5.55388	8	107.696
	-1.41277	108.001	131.917	85.5251	99.57	92.0407	95.776	94.9825	99.4234		94.1536	94.5266	101.101	101.346	103.686	100.662	97.0746	100.742		125.866	122.215	125.118	117.538	122.44	125.685	115.278	118.17		129.131	129.549	129.462	124.725	100.327	126.633	129.407	125.88			-1.41277	112.999	5.84992	8	110.551	4.95772	8	114.469	5.54002	8	107.974
	-1.34478	106.606	131.828	87.9798	96.6436	92.9945	93.392	97.5846	97.1876		89.7806	94.967	100.038	100.722	109.463	101.267	98.5373	100.713		125.117	123.537	124.338	120.792	121.101	122.27	116.105	116.001		131.124	129.322	131.349	124.704	100.178	125.485	130.035	122.62			-1.34478	112.751	6.34031	8	111.037	4.59531	8	114.605	5.53465	8	107.08
	-1.27678	108.27	129.525	89.9732	97.7305	91.1181	92.832	100.327	98.3996		92.3668	94.0233	101.633	100.575	108.393	100.208	99.0186	102.07		126.335	122.242	125.443	120.208	123.083	119.564	116.364	118.656		128.539	129.028	127.44	122.506	101.506	126.71	129.3	123.287			-1.27678	112.014	5.76148	8	111.312	4.5681	8	114.966	5.17192	8	107.543
	-1.20867	104.103	129.132	88.7831	97.9694	90.5395	93.808	98.7165	96.2932		91.395	97.452	101.785	105.578	105.68	100.246	99.9528	101.271		127.73	124.146	124.908	120.321	117.856	122.281	113.883	118.504		132.195	129.356	129.328	127.336	101.599	126.853	130.056	123.443			-1.20867	114.303	5.952	8	111.138	4.66402	8	114.637	5.45591	8	106.485
	-1.14065	106.702	128.044	90.6129	97.8858	90.8366	93.776	96.6278	98.788		93.8558	94.1648	104.545	100.844	105.806	102.023	97.773	103.592		124.499	123.32	123.723	120.12	118.188	123.988	114.989	117.835		129.552	131.826	125.653	126.651	101.216	124.846	128.544	124.318			-1.14065	113.387	5.84653	8	111.015	4.45206	8	114.363	4.97341	8	106.879
	0	100	100	100	100	100	100	100	100		100	100	100	100	100	100	100	100		100	100	100	100	100	100	100	100		100	100	100	100	100	100	100	100			0	100	0	8	100	0	8	100	0	8	100
	0.0679167	103.485	102.803	94.9271	104.169	95.6998	95.504	100.723	99.3057		97.3197	99.0878	100.861	99.7676	101.828	100.492	99.1318	100.376		103.4	98.7479	102.553	99.0577	99.111	101.46	97.947	97.3146		104.817	101.756	98.47	98.5206	102.086	98.5878	101.427	98.5836			0.067917	100.075	0.840762	8	100.314	0.501409	8	101.143	1.14329	8	98.3832
	0.136033	100.919	101.624	97.3817	101.756	92.541	101.808	99.895	98.1878		97.5078	95.9578	100.582	99.5474	101.974	97.8158	96.8104	100.482		100.347	99.1044	100.465	98.5778	99.5073	98.2498	96.0933	96.5951		101.56	99.0823	100.302	96.8998	103.236	99.5366	99.0201	98.4691			0.136033	98.9299	0.693227	8	99.668	0.758112	8	100.022	0.544104	8	97.8597
	0.20415	99.1286	109.05	93.9155	97.3244	91.7592	97.104	98.273	99.2469		98.558	97.5621	98.0124	101.468	105.262	99.5934	98.6128	100.472		100.178	99.6783	99.2981	99.6423	98.7254	101.181	97.7377	97.953		101.834	99.8074	98.2913	97.9332	100.963	98.4665	98.5408	98.8232			0.20415	99.1832	0.588295	8	100.092	0.809799	8	99.7769	1.50715	8	97.7475
	0.27215	98.5108	110.8	97.5602	102.198	92.7131	97.536	98.8098	99.4234		95.0627	100.566	98.7973	101.199	102.451	96.823	99.2073	100.096		99.8033	99.0349	104.703	97.0596	100.15	103.79	97.3091	97.426		100.102	98.663	99.2406	94.8765	101.328	97.1205	99.5846	98.5732			0.27215	98.5635	0.841941	8	99.398	0.682729	8	101.209	1.63488	8	98.3947
	0.3404	101.996	112.531	98.7801	99.3669	88.319	98.704	97.7946	102.495		101.536	98.0812	95.3538	104.012	100.292	97.6834	98.3486	102.648		99.7565	97.5567	100.798	99.0664	101.403	99.4416	96.6813	99.6453		100.456	94.5389	99.3969	95.8447	102.077	97.4515	100.405	98.1566			0.3404	98.6524	1.17154	8	99.6327	0.713162	8	101.232	1.68135	8	98.0605
	0.408283	104.975	110.461	97.3222	100.155	92.2439	97.856	98.7865	101.836		96.0815	95.8635	96.3286	98.4343	102.13	96.9175	99.0092	101.194		99.9438	99.5044	101.404	95.3756	98.4254	99.9463	94.7479	96.9193		100.854	99.7847	99.3857	97.596	102.825	98.7202	98.5834	98.969			0.408283	98.0411	0.66317	8	99.7935	0.717032	8	101.143	1.66114	8	97.5951
	0.476267	102.361	111.835	97.5454	102.269	90.8522	96.464	98.7398	99.6587		101.034	97.0588	100.848	100.477	100.904	99.2152	100.189	102.311		102.36	97.6089	99.9825	98.508	101.221	100.838	95.2661	95.7134		100.717	102.311	98.1014	96.3994	100.028	98.3672	100.554	97.6359			0.476267	99.6185	0.7551	8	99.9006	0.522609	8	101.559	1.6415	8	97.3441
	0.5445	106.702	111.639	96.9206	100.633	87.0993	96.304	98.5881	100.494		98.4639	98.0969	96.5692	100.416	100.71	101.002	99.4527	99.7592		98.9417	100.348	99.4297	96.8415	98.7039	101.6	94.4788	96.0884		100.74	105.631	102.848	96.1601	101.366	97.3632	100.724	95.7509			0.5445	99.8657	1.1409	8	99.516	0.699356	8	101.432	1.81951	8	96.6696
	0.61265	103.422	111.71	98.6314	102.52	84.8319	97.648	100.968	97.1052		99.232	98.899	97.2908	97.8593	102.383	97.0499	100.085	100.645		98.5952	95.8699	99.1402	96.6495	99.1859	100.204	96.1032	95.6526		101.23	102.64	100.436	95.8338	101.366	94.7816	97.7314	97.5526			0.61265	99.1775	0.783097	8	98.9492	0.908344	8	100.817	1.80631	8	96.4624
	0.680767	102.424	110.496	97.9768	96.6077	86.4738	97.696	98.9498	99.494		95.2978	96.7914	97.3668	97.9817	101.342	99.6218	98.7449	100.549		99.204	97.1133	99.4473	93.997	98.6718	98.9477	93.6516	95.4195		102.665	102.787	99.5533	96.5082	98.8869	97.5949	97.3267	96.3653			0.680767	98.6189	0.994766	8	98.804	0.593985	8	99.6583	1.77293	8	96.163
	0.748883	103.628	110.728	101.428	99.3669	89.4605	100.512	101.715	99.3293		96.5831	100.991	96.8983	96.8685	101.721	99.4989	97.6408	97.448		99.2695	99.1479	99.0876	96.5012	96.6581	98.8189	96.8009	95.1358		100.456	99.1956	99.4974	96.3233	103.311	96.8557	100.447	99.1773			0.748883	98.3516	0.667763	8	99.5126	0.791925	8	101.145	1.55006	8	97.3038
	0.817017	104.895	111.889	100.55	97.8022	89.007	96.864	97.3396	100.624		97.6019	94.5738	96.6831	102.765	102.83	100.681	100.444	99.3066		98.8387	98.6175	97.9646	95.8642	97.0116	99.796	93.4124	94.9128		101.264	100.125	97.6212	94.4523	101.506	98.4223	98.8817	99.021			0.817017	98.1357	1.06974	8	100.137	0.533983	8	100.803	1.84095	8	96.1209
	0.885133	103.343	116.244	99.0925	99.5222	85.817	96.576	99.5333	100.706		101.238	98.1126	100.253	101.284	102.704	99.4705	97.3861	101.589		99.4287	96.0177	98.6313	95.934	96.9152	101.278	95.0668	95.3587		101.287	102.232	97.9339	97.3349	101.469	98.301	98.5195	97.4276			0.885133	99.9595	0.665548	8	99.6082	0.726696	8	101.027	2.32324	8	96.4063
	0.953033	102.614	116.048	98.0065	101.35	86.7709	95.552	97.6313	97.6818		100.219	98.8047	102.152	96.7339	104.104	100.416	100.302	99.4029		98.9324	98.3914	98.1839	94.9219	95.437	99.8497	93.9805	96.5545		100.319	103.773	96.2028	96.1819	100.215	97.0763	98.3491	96.6778			0.953033	99.2983	1.00152	8	99.5679	0.827315	8	101.056	2.29149	8	95.4322
	1.02138	104.278	114.923	99.6281	99.7014	87.4746	98	98.8915	98.5644		99.4984	97.7509	96.4299	99.4251	100.146	99.0639	94.706	100.559		98.3892	95.9656	97.8417	93.8225	97.1294	98.0457	93.532	95.6627		102.016	101.28	98.5481	94.5067	101.721	97.97	99.8296	94.4907			1.02138	98.6819	0.870892	8	98.5607	0.946118	8	100.569	2.31583	8	95.9125
	1.08952	102.376	115.566	97.3073	96.978	86.8647	96.704	95.741	98.4702		99.4828	97.3262	96.873	98.7034	100.399	94.7144	95.7346	101.252		97.3872	95.1396	97.5785	97.1468	94.0338	101.074	93.6018	95.7134		102.824	100.476	98.3583	98.7817	100.655	96.1827	98.4982	96.8861			1.08952	99.1032	0.665804	8	98.0402	0.887236	8	99.935	2.34806	8	95.2753
	1.15763	104.452	113.174	100.104	100.299	86.6927	95.68	96.2194	97.9525		100.172	95.3602	97.9491	98.5321	99.7569	99.461	97.0463	99.2874		97.0875	96.8872	97.9821	93.299	96.7331	98.1316	93.4423	94.8622		100.364	100.963	97.543	96.5735	100.982	96.4475	97.7101	95.6467			1.15763	98.4322	0.695564	8	98.2923	0.65506	8	100.411	2.1517	8	94.9642
	1.22575	106.321	113.602	97.5007	97.4558	88.2095	97.184	98.8915	99.1057		96.2539	94.6839	99.0632	100.771	102.276	98.2035	97.1124	100.597		99.5317	97.1742	96.6485	92.6272	95.6405	96.274	93.4822	97.2943		103.61	100.329	101.195	96.1384	99.3733	98.643	98.6367	96.4695			1.22575	99.0055	1.08013	8	98.9139	0.657676	8	100.108	2.35813	8	95.7602
	1.29388	103.802	114.191	97.7536	100.37	87.1306	96.496	95.2275	99.4234		96.9279	96.6342	99.3037	97.2599	102.82	96.3502	95.4799	99.22		94.9148	96.0351	97.2715	91.2311	96.9045	97.1223	90.8511	92.4909		101.127	102.119	98.6598	94.7786	98.2789	98.2679	97.8379	94.3241			1.29388	98.3513	0.864291	8	97.8224	0.918405	8	99.4463	2.48028	8	94.4558
	1.362	107.367	111.871	96.0726	96.5719	88.3815	94.576	98.2964	97.7171		93.6991	94.9512	95.6577	96.2813	103.122	95.3385	96.0083	98.2666		96.4413	96.6003	96.0607	90.7338	97.922	97.788	95.5451	94.3859		101.184	101.02	98.5816	94.8874	100.122	97.2087	98.3491	97.8338			1.362	97.0328	1.01801	8	98.2811	0.866037	8	98.9648	2.46183	8	95.5765
	1.42993	103.422	111.389	98.2446	97.3244	89.2572	93.808	96.4761	100.012		94.906	95.3444	94.6702	97.9939	100.088	95.66	96.6594	97.891		96.2446	95.1135	97.2802	90.8298	97.2793	97.7558	91.6783	94.6595		98.6448	105.201	97.7552	96.6823	100.823	98.323	99.6698	96.6361			1.42993	97.6497	1.20112	8	98.2187	0.654412	8	98.731	2.18862	8	95.1158
	1.498	102.662	114.031	97.2032	97.7305	86.6927	93.856	95.4142	96.2579		95.7367	93.347	95.3792	97.9939	104.484	96.5488	94.857	101.358		97.8367	95.5221	97.5434	90.411	95.6191	96.2096	93.9805	95.5918		99.3509	99.3089	98.2131	94.6807	101.31	94.3954	98.1255	95.6884			1.498	96.7513	0.799204	8	98.3458	1.29315	8	99.1174	2.44	8	94.2027
	1.56612	106.115	115.709	95.4032	98.5428	89.1321	93.696	94.9242	96.811		99.2633	96.1466	101.62	99.7798	103.326	94.497	98.0466	97.2843		97.5745	95.4873	94.6394	90.3935	99.5608	98.8081	95.9338	95.3993		101.344	102.98	96.3592	96.2689	99.1114	98.4444	99.8402	95.4801			1.56612	99.2202	0.954907	8	98.2538	0.961842	8	99.2331	2.83466	8	95.5332
	1.63423	106.527	108.604	96.8611	98.8175	85.4261	93.76	95.4259	98.4114		98.652	93.3312	95.5817	98.1407	102.957	96.0382	96.0838	99.5955		96.1978	94.0179	97.9207	92.1822	95.9404	96.8968	91.2498	95.075		100.968	98.2212	97.3085	96.7693	98.8682	99.2056	97.6142	96.8861			1.63423	97.3716	0.79935	8	98.406	0.811878	8	98.8911	2.04299	8	94.0232
	1.70237	104.214	114.423	96.1916	98.9369	85.6919	96.544	96.3477	98.2113		100.345	95.659	93.8093	93.8716	101.41	96.0949	98.207	100.087		96.6848	94.9744	97.0433	91.8681	97.2365	98.7544	92.3859	93.7475		97.7907	99.932	96.1581	93.3863	99.7007	97.7052	98.6793	95.4593			1.70237	96.369	0.970618	8	98.4179	0.709057	8	99.2921	2.49477	8	94.8649
	1.77048	100.966	108.301	96.2957	99.5581	89.1947	93.888	96.5578	96.7169		97.9624	97.2161	96.2274	97.2232	102.081	96.076	94.7627	99.7978		96.8627	96.6264	95.6045	92.4352	97.9434	98.5397	91.5786	95.1763		98.5992	102.436	99.0842	93.4515	99.5604	96.6571	98.5621	96.3029			1.77048	97.775	0.904924	8	97.975	0.86086	8	98.3312	1.6863	8	94.9494
	1.83862	103.691	110.657	93.2163	97.2766	85.5512	94.656	96.6628	96.0461		98.0094	94.4322	93.9992	99.1804	99.7082	97.5038	95.8762	97.4576		98.0333	95.2352	96.3853	92.7319	91.988	97.7129	91.4391	93.5955		100.752	102.946	100.101	96.258	98.9617	96.0834	97.8911	96.5007			1.83862	98.2096	1.11208	8	97.4979	0.478274	8	98.4034	2.12426	8	93.4564
	1.90673	101.917	116.048	96.4891	95.7238	89.3667	97.024	95.5193	95.1047		96.395	98.8361	95.5311	99.0948	102.84	94.5253	94.7155	100.713		96.5911	94.9048	96.5257	90.3324	96.9152	97.176	92.7048	92.1261		101.355	101.564	97.6212	99.8912	100.786	95.9841	98.8284	97.5213			1.90673	98.786	0.771172	8	98.2391	1.08501	8	98.5665	2.73369	8	94.4921
	1.9747	100.84	109.122	92.9634	99.2236	88.0063	95.328	94.259	98.3761		97.1473	94.3221	97.3541	97.2844	102.772	97.0877	96.0366	97.3324		96.1978	96.409	95.6747	90.9868	96.9152	96.7143	94.2296	95.2371		101.162	100.906	95.354	96.4429	100.496	97.1205	99.4781	97.1777			1.9747	97.4966	0.855909	8	98.4376	0.804388	8	97.6771	1.97374	8	94.8832
	2.04272	101.426	106.105	97.59	99.6178	86.0672	96.288	97.0128	95.5401		96.1129	94.6524	95.7083	100.086	100.379	94.6672	98.1599	96.9954		95.7576	94.2092	92.7092	89.9136	93.9803	97.584	91.3992	95.7134		101.184	100.838	96.616	93.8431	100.112	96.2158	100.053	96.3653			2.04272	97.3801	1.02371	8	97.8685	0.758268	8	97.166	1.82947	8	94.1981
	2.11085	105.339	102.678	94.9569	95.7716	86.4894	95.072	94.9475	99.7058		102.382	91.1922	96.9743	98.7401	102.529	98.5439	95.093	99.7304		93.8191	93.444	94.0779	90.6378	96.2082	99.2591	91.1003	94.0211		99.6697	100.759	96.1358	96.4429	98.6531	97.8817	97.5184	97.4068			2.11085	97.7871	1.21808	8	98.4195	0.754352	8	96.3405	1.77159	8	94.6004
	2.17887	105.672	99.1432	95.0759	98.7936	89.57	96.56	95.4609	97.6583		96.5361	96.6656	97.1895	99.0948	102.237	100.425	95.8951	98.8251		96.5068	93.1049	94.3674	88.9015	97.5043	97.0257	91.9773	93.8893		98.9751	102.266	98.0344	95.3225	99.0459	97.4073	97.7527	96.8861			2.17887	98.0105	0.757084	8	98.5593	0.721982	8	96.4456	1.75348	8	94.9557
	2.2471	103.422	100.839	95.2693	97.838	85.7701	96.032	94.3057	98.5291		97.3511	95.2029	95.645	100.22	101.148	96.0571	95.1118	99.0948		96.0854	90.9573	96.9556	92.3392	94.3766	95.5009	93.1134	95.0953		99.5786	101.575	97.342	95.1376	99.392	97.6942	94.5255	95.0115			2.2471	97.7565	0.867512	8	97.2543	0.864049	8	96.7132	1.45219	8	94.0904
	2.31522	102.852	106.105	94.704	98.3516	87.9906	94.64	95.2392	96.3874		96.9592	97.2161	98.6581	95.7064	98.7551	98.6573	96.952	98.6903		96.8065	94.1918	94.1481	89.0324	94.1302	97.2082	92.2264	94.5683		99.7495	105.835	97.1186	96.5626	99.1488	96.7564	98.6261	93.3451			2.31522	98.4757	1.14074	8	97.6164	0.685642	8	97.0239	1.90759	8	94.0488
	2.38312	102.06	101.214	92.4725	98.3636	87.8968	94.848	93.3022	97.6112		100.768	94.4637	93.5308	94.8257	100.593	97.0499	96.3386	100.751		94.7837	94.1396	94.3236	89.4076	97.3865	97.7451	92.2364	92.4301		98.5195	100.691	98.5928	95.6271	100.421	97.5838	97.561	96.0737			2.38312	97.1273	1.01435	8	98.2966	0.696815	8	95.8455	1.54083	8	94.182
	2.45147	102.361	102.749	96.1024	97.8978	85.5199	96.048	94.7375	97.4112		101.411	93.4413	94.8601	96.7951	99.0274	96.8608	96.9992	98.5844		94.2499	93.5919	94.7973	89.8351	95.8333	97.4015	93.6815	95.5107		97.0732	102.561	97.8334	95.0179	99.8971	96.8998	98.6154	95.2093			2.45147	97.374	1.12733	8	97.7617	0.538154	8	96.448	1.56026	8	94.5179
	2.51958	102.741	105.784	98.7057	95.3416	85.1134	94.784	95.5776	98.482		103.589	96.6656	91.4926	98.3976	101.488	97.0783	94.4229	99.4607		95.6078	94.3135	95.1483	88.6921	94.6015	96.4458	92.047	93.2205		97.7565	101.224	99.6426	95.8664	100.767	98.0803	99.2864	95.1156			2.51958	98.0793	1.28991	8	98.2124	0.89862	8	97.0417	1.87731	8	93.784
	2.58772	105.339	102.428	96.4743	96.4644	86.0047	95.216	95.2159	97.3288		103.918	95.1557	92.6067	95.5352	103.073	95.3763	94.5173	99.037		96.1135	92.8528	94.2885	88.727	95.662	94.0191	93.6018	94.1021		98.5765	100.567	96.2922	94.8004	98.943	98.0252	96.8793	94.8761			2.58772	97.1814	1.28865	8	97.5909	1.0035	8	96.5859	1.8515	8	93.8938
	2.65568	101.267	103.052	96.9057	98.8175	86.1767	92.4	97.8646	98.176		102.398	96.0208	97.1389	95.5229	100.992	98.6006	98.7261	98.6807		94.8492	93.3397	92.8935	92.2694	98.3398	97.3263	90.3727	92.876		98.7359	103.864	95.5327	92.4943	97.9048	94.5057	98.5728	95.2406			2.65568	97.7134	1.34167	8	97.9029	0.736659	8	96.6744	1.43036	8	94.1915
	2.72397	103.565	104.73	97.9768	95.4849	85.4574	94.496	93.6756	99.5528		95.721	97.3891	95.126	96.7951	101.313	95.3669	95.8384	97.8525		96.3664	91.7398	92.0425	88.7357	92.877	96.1666	91.2099	93.636		99.5103	102.243	96.9511	96.0949	97.2407	95.2891	98.2639	94.0429			2.72397	97.4789	0.825091	8	96.9009	0.808367	8	96.3302	1.99759	8	93.3839
	2.79208	102.915	101.303	95.1503	98.6025	86.724	96.064	92.6838	98.176		95.5643	96.7757	96.278	96.6239	100.729	95.6222	97.5653	98.0354		94.5964	93.844	95.2097	88.1162	94.9122	96.5854	92.0072	92.957		98.7587	102.878	95.8343	94.3218	98.3444	96.966	99.1479	94.2304			2.79208	97.1293	0.933649	8	97.5801	0.714633	8	96.2172	1.64998	8	93.7637
	2.86008	101.315	102.571	97.5602	94.6608	86.3487	94.544	96.0093	96.3992		97.2727	96.7443	94.6322	97.7492	101.06	98.4871	96.2065	99.5859		92.6578	91.6964	93.5866	88.8666	93.6161	96.1989	90.7016	94.8622		97.449	101.937	95.1195	93.3972	98.466	95.3222	96.0166	94.1262			2.86008	96.7877	0.916557	8	97.4088	0.833082	8	95.3642	1.68405	8	93.585
	2.92808	101.648	104.552	98.4231	97.8261	84.1595	92.672	94.0023	95.9285		97.4765	94.039	94.7082	97.9083	101.099	96.5015	94.3475	98.6518		94.0626	90.566	92.7005	88.6485	93.916	96.7894	91.9972	92.5415		104.271	103.648	100.413	95.5292	100.543	95.6862	94.8344	94.7615			2.92808	98.4992	1.38852	8	97.053	0.952142	8	96.0533	1.94766	8	92.7508
	2.9962	100.65	102.82	96.266	93.2633	85.9421	91.728	96.126	99.9529		95.2038	95.0613	96.3666	94.8502	101.459	95.5087	96.7821	97.4287		95.4205	90.9225	93.262	87.7498	95.0514	95.8553	91.3594	95.8756		97.301	98.2438	96.147	95.3117	101.412	97.3191	94.8131	93.5638			2.9962	96.0607	0.426049	8	97.2859	1.01633	8	95.0443	1.74268	8	93.9863
	3.06415	97.6394	102.517	96.7569	97.0736	86.7084	91.904	92.7538	97.4582		95.8464	95.659	97.9111	95.474	100.243	93.542	94.187	99.1044		91.9367	91.4268	93.2883	87.9243	93.6911	94.4379	90.9109	93.8589		99.6697	103.206	97.5095	93.8214	98.5034	95.5318	96.7515	95.1573			3.06415	97.3872	1.04453	8	96.6276	0.86169	8	94.8204	1.61327	8	92.7154
	3.13245	99.1128	102.16	94.6147	95.4372	85.473	94.048	95.3209	95.7872		95.5016	97.5936	93.746	97.1009	100.535	96.3786	95.829	96.7643		93.2478	91.3138	93.0339	89.7304	93.9482	95.5331	89.9243	92.6226		98.1551	104.09	97.8222	93.7996	98.5221	94.2299	94.9409	94.1887			3.13245	97.2262	1.15967	8	96.4235	0.77671	8	94.8313	1.44286	8	92.8322
	3.20057	103.771	102.66	96.2065	96.8944	88.3972	94.288	94.259	95.0341		96.7712	98.8518	93.2903	97.4924	102.927	94.9981	98.9148	99.7304		92.6859	93.4875	93.7182	88.3082	95.8226	96.5854	91.7182	93.2408		98.2348	104.917	96.8841	94.6046	97.8954	94.2189	95.3137	93.5847			3.20057	97.6308	1.22666	8	97.1979	1.14169	8	95.9664	1.82852	8	93.6682
	3.26862	100.507	104.32	94.6593	95.2461	84.7224	94.816	94.7491	96.811		92.8683	97.0903	95.9235	97.8593	101.439	96.6906	95.6875	101.088		94.9522	93.5484	92.4724	87.4008	94.5587	94.352	91.6185	92.5111		96.9935	102.413	95.4434	92.7445	101.179	96.293	94.5575	91.7205			3.26862	96.417	1.08639	8	97.3319	1.26179	8	95.3883	1.80478	8	93.0174
	3.33682	102.868	101.892	99.152	95.1983	83.3464	97.488	94.7025	97.317		97.1787	95.4703	94.9867	97.1988	100.35	96.5015	95.1779	99.923		93.688	92.6528	91.4283	91.013	93.6482	97.8739	91.8477	90.4236		97.3693	101.96	94.6281	92.5269	98.0451	96.2268	93.6415	92.1683			3.33682	96.4149	0.982881	8	96.5043	1.01493	8	95.9865	1.6625	8	93.3309
	3.40493	102.186	100.643	94.6891	94.3383	88.6317	93.312	96.3827	97.4935		96.7555	97.4678	90.8849	95.5596	100.691	94.7239	96.0555	97.6888		94.5308	90.8704	91.9723	88.2035	91.988	94.6419	91.7281	95.0041		97.8704	98.1985	100.793	92.7445	100.823	93.0163	96.1764	93.9388			3.40493	96.2843	1.12074	8	96.6392	1.03217	8	94.6791	1.66812	8	93.6478
	3.47298	101.141	102.803	92.2196	96.2016	85.8483	93.824	91.2135	96.105		97.7273	99.2608	93.2903	94.3976	102.179	97.2674	96.3008	99.5474		93.2572	90.4008	92.2618	87.1564	97.1722	96.5532	90.4325	92.5922		99.0889	96.7369	97.3643	93.4624	98.8214	97.5066	93.9823	93.0639			3.47298	96.4161	0.850702	8	97.3336	1.04497	8	94.4301	1.88212	8	92.9676
	3.54118	101.41	103.409	95.2544	95.7119	86.9898	91.872	95.0175	97.6936		96.9749	97.2476	95.0373	99.107	100.146	94.9792	97.0369	98.4977		92.6016	89.5922	91.8407	89.0847	94.0981	95.6835	90.0239	93.0786		97.8362	98.8557	94.6504	91.3956	97.1845	96.9109	95.335	94.8032			3.54118	96.3881	0.910556	8	96.8617	0.650714	8	94.8631	1.85259	8	93.0571
	3.60932	101.473	105.73	96.2065	94.6249	87.6466	94.288	91.1435	95.093		97.3197	99.2765	93.6574	94.8502	100.817	94.8185	94.4984	98.1799		90.9346	91.0095	93.4024	88.3169	93.916	95.5331	90.3229	92.4605		97.4035	106.3	94.8738	95.0723	100.281	96.3372	98.0403	92.4182			3.60932	97.3441	1.43312	8	96.9238	1.03689	8	95.2123	2.06131	8	92.5505
	3.67743	99.4455	103.267	94.8081	96.3091	84.7381	95.936	95.9743	94.4928		98.8245	94.9355	95.3792	96.9052	101.955	95.8396	95.678	96.1094		92.5361	90.6182	89.5771	89.6519	93.3912	95.211	89.5754	92.197		98.1437	100.091	97.2191	93.2122	99.1862	95.1346	95.6864	94.699			3.67743	96.8387	0.793657	8	96.786	0.879847	8	94.5266	1.74918	8	92.6895
	3.74555	97.481	102.731	95.2395	95.0908	87.2713	93.472	94.4457	96.0226		98.5266	97.0903	95.8349	98.2752	100.496	95.4331	95.7535	95.9457		92.0584	91.592	92.9023	89.9311	94.5801	96.478	89.9243	93.0381		98.6676	102.549	95.7561	93.5168	99.2891	95.4214	94.3018	92.5432			3.74555	97.5271	0.948261	8	96.148	0.910357	8	94.6283	1.43458	8	93.154
	3.81368	98.8118	104.141	96.9206	94.2547	87.3651	93.584	94.5858	95.14		99.0596	97.9868	96.7084	96.9052	98.2883	97.9293	96.5273	95.0693		92.2926	91.7659	90.8405	87.3571	94.3338	95.6512	89.715	93.5347		94.9436	95.8078	94.3712	92.6792	100.786	96.613	95.5054	92.6682			3.81368	96.0577	0.725015	8	96.6733	0.856696	8	94.5481	1.86226	8	92.9887
	3.8818	101.695	100.321	98.7504	98.5308	87.2557	94.256	94.154	96.0108		100.627	98.2227	94.9867	95.2905	98.9399	94.5726	96.0272	99.4126		92.1708	88.7053	90.3053	86.3188	96.1332	95.3398	88.6386	90.9303		97.6426	99.6148	93.4108	91.0802	98.9805	96.624	96.3894	92.5432			3.8818	96.3594	1.1458	8	96.6862	0.844452	8	94.5997	2.0849	8	92.8398
	3.94968	101.521	98.6433	96.3404	97.4916	88.6943	97.056	93.1389	96.8345		98.8245	97.1217	93.4802	95.8777	99.611	95.225	94.6966	98.0258		92.2926	89.0792	92.0688	86.9383	95.2871	96.6176	89.3363	90.2412		97.5174	99.932	93.8687	93.3754	98.5221	96.0944	94.5042	93.6367			3.94968	96.2497	0.88938	8	96.2895	0.767235	8	94.2969	1.77188	8	93.4007
	4.0178	103.105	98.447	97.6049	93.0602	87.6466	92.768	91.8203	96.3992		101.254	96.7443	94.974	97.3578	101.585	97.1634	95.1968	98.0547		91.6089	91.2616	89.4894	88.5699	92.1915	93.203	90.7614	90.6263		97.3579	103.512	95.22	93.321	98.2976	95.8959	95.4521	91.2727			4.0178	97.4677	1.19437	8	96.6148	1.05501	8	94.1434	1.79006	8	91.927
	4.08592	100.507	98.447	96.1172	95.0788	85.0352	92.976	93.0222	96.3521		100.549	100.346	92.6446	96.5872	97.695	95.7262	93.6586	99.4607		91.8524	91.2095	90.2614	89.1371	93.4126	94.4164	91.0405	91.0519		96.2988	100.589	95.6332	92.7771	97.6522	94.0313	95.974	90.6686			4.08592	96.9281	1.16467	8	95.6083	0.983883	8	94.0763	1.45	8	92.1633
	4.15387	101.537	98.4113	98.2148	91.9374	85.1916	95.216	98.1447	96.305		100.408	95.8163	93.8726	97.8838	100.224	93.7878	94.9891	96.0901		91.4591	90.027	92.1916	87.8457	91.581	95.1895	91.8676	92.4199		97.3465	102.243	95.1977	92.168	96.6327	95.8959	97.1349	92.8348			4.15387	96.867	1.17749	8	95.9486	0.795745	8	93.953	1.69901	8	93.2394
	4.22217	99.097	98.8933	97.947	95.4013	89.007	94.768	92.1704	94.5164		99.8433	96.9015	93.4549	96.4404	100.486	95.9342	96.9897	96.0035		90.9065	90.6182	91.8933	86.441	92.4593	94.5453	89.4658	92.3085		97.5288	95.8985	93.7011	96.4647	98.7092	94.1086	95.2498	94.0221			4.22217	96.2791	0.725551	8	96.4379	0.790219	8	93.8997	1.63646	8	92.4051
	4.29003	102.075	99.5002	100.104	94.1113	88.8194	90.832	92.5904	97.164		99.232	97.2633	94.7082	94.8624	101.274	96.1706	95.9989	99.9807		91.8899	88.6184	90.2439	86.9383	95.4692	93.3212	87.2932	91.8829		98.3829	101.654	92.8412	91.8416	98.7092	94.1306	96.219	93.1368			4.29003	96.3482	1.18738	8	96.9525	0.995646	8	94.1852	2.02596	8	92.1715
	4.35828	102.392	99.2324	95.7156	93.753	87.8655	94.496	95.0058	96.0814		103.558	96.414	94.1765	94.9847	98.7259	97.9009	96.6217	98.9985		90.9159	90.2182	88.9103	86.9383	92.9734	93.5574	88.8479	92.9672		98.7928	100.453	95.019	93.7996	97.5493	93.7335	95.2072	91.533			4.35828	97.1497	1.22846	8	96.2837	0.924832	8	93.5095	1.8826	8	92.7243
	4.42653	101.046	99.3752	97.352	96.333	86.5207	94.544	93.0338	94.8458		102.1	95.9264	93.9739	94.0061	98.8621	94.393	95.093	97.4287		89.8389	89.0792	90.2439	85.8826	93.8625	93.7614	92.2264	88.5792		97.8818	102.912	93.7011	94.3435	97.9983	94.1637	95.548	92.4703			4.42653	96.8556	1.32818	8	95.7446	0.76933	8	93.6438	1.96272	8	92.1717
	4.49467	103.375	106.908	97.3669	96.0941	86.7709	92.848	91.6219	94.3869		99.7806	98.38	95.607	93.1621	100.272	96.6339	96.3008	95.4449		90.8223	90.0443	88.7963	86.9383	94.3766	95.7049	87.7118	92.7341		96.6974	100.748	93.2767	92.255	97.9048	93.7224	96.8367	91.2935			4.49467	96.2383	1.13531	8	96.0512	0.951493	8	95.0431	2.55025	8	92.0194
	4.5627	101.125	106.694	97.8578	95.7119	86.0985	93.504	92.0887	92.2452		97.5862	96.0522	96.4679	93.4801	98.7065	95.9626	96.8293	97.9199		91.2905	89.94	90.3667	85.2282	91.4846	94.4486	88.9376	91.2951		96.3102	101.473	96.1805	92.9403	98.4941	97.2749	94.7811	94.3553			4.5627	96.3113	0.92346	8	96.7905	0.57845	8	94.7767	2.45988	8	91.2628
	4.6309	101.933	105.587	98.1107	92.4988	89.9922	93.04	90.6884	96.1403		94.8433	97.2161	92.1509	97.1376	100.068	94.7428	94.7721	97.8236		89.277	87.3055	91.481	88.0377	95.8762	93.3641	90.4325	92.5719		98.2348	97.1335	95.4992	93.4407	98.4941	94.4726	94.3125	92.7515			4.6309	95.707	0.747855	8	95.9297	0.895196	8	94.2788	2.40811	8	92.7632
	4.69903	103.438	112.353	97.0396	96.5719	85.864	93.2	95.2042	93.4455		96.348	98.3485	94.7462	97.1131	100.058	96.3124	93.4698	98.5362		88.2562	89.1401	89.5245	86.2577	95.512	95.3828	86.3265	92.4301		100.456	97.7906	94.2931	92.3094	96.4175	94.7926	93.6841	91.9184			4.69903	96.4255	0.912135	8	95.6487	0.964275	8	95.3226	3.1745	8	92.1706
	4.76715	99.9208	106.516	98.5421	94.2785	87.8186	95.232	92.6371	96.7051		102.461	94.6681	92.2142	92.7829	100	94.9508	94.8382	100.607		90.56	88.8531	91.8582	86.8074	91.5167	96.274	89.6452	89.9878		98.7131	101.382	94.9408	92.5378	98.4099	96.0282	94.1847	93.0952			4.76715	96.2125	1.44714	8	96.5142	0.99192	8	94.667	2.32796	8	92.4771
	4.83515	103.026	110.407	96.7272	93.8247	85.3323	92.688	92.5671	93.9515		104.812	97.3891	91.3913	95.4128	97.977	98.1373	94.0549	95.8975		91.2156	88.9575	88.4804	87.7061	92.7378	95.2647	86.6653	89.4203		97.4263	99.7394	93.2767	92.4508	98.0638	95.6311	94.0036	91.5538			4.83515	96.4873	1.55434	8	95.6649	0.840083	8	95.0431	2.84317	8	91.0784
	4.90313	100.285	98.0364	93.6775	94.1233	87.2557	92.176	94.1657	95.0224		98.0094	98.4429	94.2651	94.0061	98.4536	95.7356	95.4515	98.074		90.5975	88.714	90.6738	86.6242	92.8449	95.0929	88.8579	90.8796		98.4284	99.8754	93.8352	91.2433	98.0264	93.8327	95.058	93.0639			4.90313	96.0132	1.07917	8	95.962	0.719518	8	92.8415	1.63752	8	92.0369
	4.97127	101.41	97.6973	100.64	94.8161	86.5676	93.136	95.3442	95.3048		99.4984	95.0771	91.7078	95.1315	98.2883	94.7144	95.3194	97.7947		88.7151	88.2532	87.3925	85.6557	94.0231	92.9346	87.0739	90.3628		96.8341	100.533	95.7784	92.7989	97.83	94.7926	93.7693	94.6782			4.97127	95.9198	1.06697	8	95.8984	0.627068	8	93.0724	2.23881	8	91.8434
	5.03927	102.614	98.3577	93.5733	93.3349	89.5543	95.6	91.6569	92.4453		97.9781	98.7889	93.6068	96.208	100.165	96.5204	94.2059	95.339		90.7473	88.6792	89.6473	86.0571	93.3912	94.4379	89.2765	89.9676		95.5928	99.3655	94.6393	94.4414	96.8852	96.1055	92.1504	94.522			5.03927	96.3276	0.760361	8	95.7367	0.829377	8	92.8764	1.91163	8	92.0412
	5.10727	102.345	104.534	95.5668	95.0311	87.8186	94.16	91.6219	93.5044		95.0784	96.6656	95.7716	93.0398	97.1893	96.1989	95.2817	97.7465		89.277	89.8183	89.5947	86.4846	91.6452	94.6741	87.8413	88.6502		97.916	99.4448	93.9022	92.5487	100.196	96.1165	95.4947	93.1993			5.10727	95.5459	0.848401	8	96.4279	0.723061	8	94.0814	2.31358	8	91.2395
	5.17563	98.4157	98.679	94.8676	93.4902	86.5676	93.552	91.3186	93.6103		93.8715	97.2476	91.1888	96.367	99.3678	97.2579	94.121	99.5281		86.5331	88.8184	88.6033	87.6451	91.3668	94.4701	86.476	91.7916		96.686	100.034	93.9133	94.4958	95.8283	93.3804	92.0652	90.7103			5.17563	95.4755	0.949901	8	95.2824	1.15835	8	92.1315	1.72477	8	91.1441
	5.2436	103.628	100.821	94.2428	92.3316	90.3987	95.584	92.2987	93.5279		98.3856	97.4835	96.6325	96.0979	102.198	95.2534	96.0177	97.9006		88.5653	88.8097	89.1648	85.2631	92.9413	97.0364	88.5689	89.9473		98.3943	104.022	94.159	91.7328	97.0068	93.3363	94.4829	93.0223			5.2436	97.1135	1.26822	8	96.1523	1.04947	8	92.8533	2.26675	8	92.5379
	5.31188	101.616	101.357	96.1172	92.4152	88.4128	94.032	93.2555	94.3398		98.7461	96.1466	93.6574	96.1713	102.091	94.497	95.3289	98.0258		87.1512	88.2358	88.2699	84.6523	93.3483	95.5224	90.3827	91.893		97.4604	97.6547	94.7733	91.2977	96.006	94.1417	93.2048	90.6894			5.31188	95.7384	0.855852	8	95.4981	1.2054	8	92.4768	2.31803	8	92.6483
	5.37975	102.281	101.464	95.9387	92.666	87.5997	94.288	93.734	93.4691		97.2414	96.3668	94.2018	94.2997	97.8312	95.1116	95.8762	96.3598		89.5861	87.1663	88.0242	85.4201	89.4816	93.0635	88.1304	90.6161		94.0212	102.912	93.7235	93.9519	97.2687	93.0053	93.6415	91.6684			5.37975	95.8398	1.1073	8	95.0953	0.763486	8	92.8183	2.29193	8	91.2978
	5.44775	104.864	98.9647	93.9155	93.4902	86.208	96.32	91.2019	92.1511		94.1693	97.6565	94.974	91.792	99.6888	92.6532	93.0641	97.7851		87.9565	89.1835	90.7528	87.1128	90.2635	93.7507	88.3396	90.3527		96.0825	97.5867	94.9966	94.6699	97.4371	93.7445	96.3468	92.814			5.44775	95.2409	0.675409	8	95.4417	0.959391	8	93.28	2.14013	8	91.0734
	5.516	101.996	99.0361	96.028	91.603	87.9593	94.56	92.2637	93.0337		96.7712	99.072	89.2518	93.578	98.2591	95.5465	93.1301	95.782		88.8837	89.2531	86.2169	85.9698	89.4494	92.3011	89.3761	91.2647		97.244	98.5497	93.6788	92.4834	98.0264	92.9722	92.2462	90.9602			5.516	95.0786	1.19857	8	94.6153	0.954486	8	92.3733	2.12032	8	91.276
	5.58413	100.65	97.7687	97.0693	93.0602	86.3018	94.352	90	93.7279		95.1254	99.1507	95.9615	94.1162	99.504	96.4259	93.3755	95.4642		89.0054	87.2185	86.9363	84.8355	91.0026	95.9089	87.8413	89.7548		98.0982	101.496	95.9795	91.2977	96.3427	93.9762	96.1657	93.7513			5.58413	96.4031	1.1153	8	95.6257	0.704717	8	92.0679	2.086	8	91.1112
	5.65217	102.551	97.8401	93.6924	91.5552	88.7256	96.176	88.8681	93.4808		97.0219	98.4586	93.4675	95.8899	98.9788	95.1021	96.1687	97.5924		88.9773	87.9576	88.5945	87.1826	92.1487	94.352	88.7881	88.8022		96.8682	101.348	94.2037	93.321	96.2118	92.6853	94.174	91.5018			5.65217	96.3224	0.967738	8	95.3019	0.875712	8	92.2938	1.92761	8	91.4177
	5.72037	103.628	97.8579	94.5849	95.3536	90.086	94.976	91.8086	90.3624		96.348	96.9487	94.0246	93.6147	98.8621	92.7856	92.5168	96.5524		89.0429	87.9228	86.8135	84.0852	92.5021	93.5037	87.0142	88.5995		97.301	97.6093	93.0199	91.4826	97.3155	94.2299	93.3859	91.5434			5.72037	95.0436	0.811368	8	94.6489	0.925027	8	92.4111	2.31846	8	91.1066
	5.78823	101.663	100.821	97.1883	93.7052	88.835	95.824	91.0618	93.5985		98.6207	99.2608	92.0496	90.789	98.901	94.3362	91.96	93.7693		88.1719	86.3316	87.7347	85.1671	91.9559	95.0714	88.2699	89.623		97.7907	97.8359	95.5551	93.5059	97.6522	95.3663	93.5776	92.7723			5.78823	95.676	1.13717	8	94.7919	0.8475	8	92.5979	2.35216	8	91.7799
	5.85623	103.596	95.8765	95.1651	92.1405	87.5371	97.072	91.797	93.2102		99.5298	98.726	91.8344	94.8991	95.8763	95.5182	93.6586	98.0643		88.8462	89.3053	86.6994	83.5006	91.1418	91.3347	88.9376	91.5484		93.8845	95.128	92.9082	90.83	97.1565	92.8067	94.206	93.2618			5.85623	94.7175	1.09234	8	95.0685	0.672163	8	91.8912	2.22401	8	91.5724
	5.92447	101.458	99.3217	95.3734	93.5022	87.1149	94.352	92.7538	93.3631		95.7524	98.0025	93.8726	93.0275	97.4324	94.0148	92.9414	96.1479		89.4269	85.0969	90.0772	85.6732	93.2412	95.0392	88.4293	90.7175		94.9209	97.6886	93.6341	92.9076	97.8861	93.4466	95.5799	92.4391			5.92447	94.9758	0.709838	8	94.986	0.732881	8	92.4911	2.12451	8	91.8764
	5.99235	103.248	96.8404	92.9932	92.9408	86.1923	93.76	91.6103	93.3161		98.4169	96.2567	94.7841	94.6789	99.6693	95.0927	95.5176	94.973		89.455	87.8271	86.9012	85.3067	94.4837	95.0177	86.0773	91.1431		97.3465	101.813	94.6281	91.4174	98.3257	94.3292	94.4297	92.5224			5.99235	96.1677	1.097	8	95.6074	0.813963	8	91.939	2.09793	8	91.4501
	6.06058	102.25	99.3931	97.7685	92.3435	89.9296	93.12	89.1365	92.7512		100.423	96.3039	95.4298	94.8746	97.1309	94.6766	94.187	96.5909		88.3124	89.8183	87.2083	83.6838	92.952	94.2231	87.5822	92.724		96.0825	100.963	92.3163	91.6458	96.2772	90.4347	95.6119	90.8352			6.06058	96.0049	1.18334	8	94.4681	0.904025	8	92.5972	2.31737	8	91.5523
	6.12887	100.57	97.0189	95.1205	94.3741	85.1603	95.184	91.4936	90.9979		99.4201	97.9868	89.5177	96.5627	95.7888	94.9792	90.7993	96.9761		89.5673	86.7577	87.0679	85.996	89.8243	94.7493	86.0674	90.1905		96.5949	96.9295	95.3317	92.7771	97.9141	96.1717	94.0143	90.7103			6.12887	95.6401	1.10999	8	94.6692	0.949969	8	92.0591	1.92613	8	90.4584
	6.19698	103.074	102.731	97.0544	92.2599	89.1009	97.376	90.8168	92.5041		101.552	99.0091	93.2397	95.4495	100.136	93.1638	93.0735	99.1718		86.1397	87.9054	85.4536	84.3644	91.9773	93.4822	85.0409	89.8662		96.9138	100.634	92.8077	91.9504	95.6318	94.2079	94.9515	91.783			6.19698	96.4445	1.3033	8	95.2649	1.04953	8	92.3728	2.72079	8	91.2705
[truncated: 513 more rows]
[truncated: 2 more columns]

## Sheet: Fig4G
Elen
lipid to protein ratio 50
H-transport using Magnesium
NORMALIZED DATA
		Elen65 LPR50																		Elen65 LPR50																				Condition
[truncated: 406 more rows]
[truncated: 2 more columns]

## Sheet: Fig4H
EcoDMT-WT
Lipid to protein ratio 50
H-transport using Manganese
[truncated: 724 more rows]
