# Supplementary material for: Structural and functional properties of a magnesium transporter of the SLC11/NRAMP family
Source: eLife journal article supplement (doi:10.7554/elife.74589), 2022-01-10
Supplement: supp [file Figure4_supplement1.xlsx]

## Sheet: Fig4-S1-B
elution volume ml	mAu
0	0.189
0.0229057	0.151
0.0458113	0.107
0.068717	0.097
0.0916227	0.058
0.114528	0.051
0.137434	0.051
0.16034	0.051
0.183245	0.041
0.206151	0.031
0.229057	0.035
0.251962	0.014
0.274868	0.023
0.297774	0.026
0.320679	0.019
0.343585	0.007
0.366491	0.017
0.389396	-0.001
0.412302	0.005
0.435208	0.001
0.458113	-0.001
0.481019	-0.008
0.503925	-0.019
0.52683	0.003
0.549736	-0.002
0.572642	-0.008
0.595547	-0.011
0.618453	-0.011
0.641359	0.023
0.664264	0.003
0.68717	-0.005
0.710076	-0.016
0.732981	-0.015
0.755887	-0.008
0.778793	-0.002
0.801698	-0.016
0.824604	-0.017
0.84751	0.008
0.870415	-0.019
0.893321	0.002
0.916227	-0.012
0.939132	-0.011
0.962038	-0.009
0.984944	-0.008
1.00785	-0.004
1.03075	-0.007
1.05366	0.008
1.07657	-0.008
1.09947	0.011
1.12238	0.002
1.14528	0.004
1.16819	-0.018
1.19109	-0.01
1.214	-0.011
1.23691	-0.006
1.25981	-0.013
1.28272	-0.03
1.30562	-0.026
1.32853	-0.015
1.35143	-0.02
1.37434	-0.009
1.39725	-0.017
1.42015	0.001
1.44306	-0.005
1.46596	-0.012
1.48887	-0.018
1.51177	-0.019
1.53468	-0.005
1.55759	0.006
1.58049	0.002
1.6034	-0.014
1.6263	-0.01
1.64921	0.014
1.67211	-0.016
1.69502	-0.017
1.71792	-0.007
1.74083	0.015
1.76374	-0.019
1.78664	-0.02
1.80955	-0.017
1.83245	-0.017
1.85536	-0.026
1.87826	-0.022
1.90117	-0.013
1.92408	-0.021
1.94698	-0.021
1.96989	-0.025
1.99279	-0.012
2.0157	0.002
2.0386	0.003
2.06151	-0.014
2.08442	-0.014
2.10732	-0.008
2.13023	-0.009
2.15313	-0.014
2.17604	-0.009
2.19894	-0.026
2.22185	-0.013
2.24476	-0.009
2.26766	-0.013
2.29057	-0.026
2.31347	-0.024
2.33638	-0.014
2.35928	-0.012
2.38219	-0.031
2.40509	-0.025
2.428	-0.012
2.45091	-0.008
2.47381	-0.011
2.49672	-0.008
2.51962	-0.019
2.54253	-0.022
2.56543	-0.008
2.58834	0
2.61125	-0.006
2.63415	-0.019
2.65706	-0.019
2.67996	-0.009
2.70287	-0.019
2.72577	-0.017
2.74868	-0.024
2.77159	-0.002
2.79449	-0.002
2.8174	0.009
2.8403	-0.016
2.86321	-0.004
2.88611	-0.014
2.90902	-0.024
2.93192	-0.021
2.95483	-0.014
2.97774	-0.013
3.00064	-0.006
3.02355	-0.015
3.04645	-0.021
3.06936	-0.025
3.09226	-0.014
3.11517	-0.021
3.13808	-0.02
3.16098	-0.018
3.18389	-0.008
3.20679	-0.017
3.2297	-0.009
3.2526	-0.032
3.27551	-0.027
3.29842	-0.009
3.32132	-0.006
3.34423	0
3.36713	-0.013
3.39004	-0.019
3.41294	-0.02
3.43585	-0.024
3.45876	-0.012
3.48166	-0.003
3.50457	-0.03
3.52747	-0.021
3.55038	0.001
3.57328	-0.014
3.59619	-0.01
3.61909	-0.02
3.642	-0.013
3.66491	-0.016
3.68781	-0.028
3.71072	-0.017
3.73362	-0.017
3.75653	-0.032
3.77943	0.005
3.80234	-0.002
3.82525	-0.005
3.84815	-0.005
3.87106	-0.002
3.89396	-0.019
3.91687	-0.013
3.93977	-0.028
3.96268	-0.021
3.98559	-0.009
4.00849	-0.009
4.0314	-0.01
4.0543	-0.029
4.07721	-0.02
4.10011	-0.017
4.12302	-0.023
4.14593	-0.01
4.16883	-0.002
4.19174	-0.009
4.21464	-0.005
4.23755	-0.011
4.26045	-0.008
4.28336	-0.006
4.30626	-0.026
4.32917	-0.039
4.35208	-0.013
4.37498	-0.026
4.39789	-0.028
4.42079	-0.01
4.4437	-0.023
4.4666	-0.015
4.48951	-0.022
4.51242	-0.011
4.53532	-0.003
4.55823	-0.003
4.58113	-0.017
4.60404	-0.014
4.62694	-0.026
4.64985	-0.018
4.67276	-0.011
4.69566	-0.01
4.71857	-0.014
4.74147	-0.004
4.76438	0
4.78728	-0.023
4.81019	-0.038
4.8331	-0.02
4.856	-0.016
4.87891	-0.035
4.90181	0.001
4.92472	-0.018
4.94762	-0.02
4.97053	-0.014
4.99343	-0.028
5.01634	-0.035
5.03925	-0.015
5.06215	-0.005
5.08506	-0.018
5.10796	-0.029
5.13087	-0.015
5.15377	-0.015
5.17668	0.004
5.19959	0.008
5.22249	0
5.2454	-0.006
5.2683	-0.006
5.29121	-0.014
5.31411	-0.026
5.33702	-0.028
5.35993	-0.016
5.38283	-0.019
5.40574	-0.007
5.42864	-0.008
5.45155	-0.001
5.47445	-0.019
5.49736	-0.015
5.52026	-0.022
5.54317	-0.01
5.56608	-0.014
5.58898	-0.009
5.61189	-0.009
5.63479	0.002
5.6577	-0.014
5.6806	-0.022
5.70351	-0.006
5.72642	-0.01
5.74932	-0.007
5.77223	-0.014
5.79513	-0.01
5.81804	-0.019
5.84094	-0.004
5.86385	-0.003
5.88676	0.011
5.90966	0.02
5.93257	0
5.95547	-0.004
5.97838	-0.006
6.00128	0.019
6.02419	-0.007
6.0471	-0.003
6.07	-0.008
6.09291	-0.012
6.11581	-0.022
6.13872	0.005
6.16162	-0.003
6.18453	-0.014
6.20743	0
6.23034	0.019
6.25325	0.005
6.27615	0.016
6.29906	0.013
6.32196	-0.017
6.34487	0.005
6.36777	-0.013
6.39068	-0.006
6.41359	-0.022
6.43649	-0.008
6.4594	-0.011
6.4823	-0.014
6.50521	-0.008
6.52811	0.007
6.55102	-0.011
6.57393	0.014
6.59683	0.03
6.61974	0.024
6.64264	-0.005
6.66555	0.006
6.68845	0.013
6.71136	0.016
6.73427	0.01
6.75717	0.034
6.78008	0.038
6.80298	0.055
6.82589	0.06
6.84879	0.08
6.8717	0.095
6.8946	0.137
6.91751	0.166
6.94042	0.211
6.96332	0.253
6.98623	0.328
7.00913	0.39
7.03204	0.472
7.05494	0.551
7.07785	0.643
7.10076	0.782
7.12366	0.881
7.14657	1.021
7.16947	1.167
7.19238	1.351
7.21528	1.53
7.23819	1.737
7.2611	1.954
7.284	2.248
7.30691	2.499
7.32981	2.803
7.35272	3.15
7.37562	3.582
7.39853	4.045
7.42144	4.618
7.44434	5.268
7.46725	5.975
7.49015	6.897
7.51306	7.795
7.53596	8.993
7.55887	10.166
7.58177	11.695
7.60468	13.267
7.62759	15.171
7.65049	17.158
7.6734	19.498
7.6963	21.991
7.71921	24.553
7.74211	27.43
7.76502	30.051
7.78793	32.759
7.81083	35.549
7.83374	38.152
7.85664	40.551
7.87955	42.93
7.90245	44.937
7.92536	46.948
7.94827	48.528
7.97117	49.974
7.99408	51.142
8.01698	52.014
8.03989	52.698
8.06279	53.043
8.0857	53.152
8.1086	53.158
8.13151	52.917
8.15442	52.62
8.17732	52.076
8.20023	51.601
8.22313	50.91
8.24604	50.327
8.26894	49.565
8.29185	48.833
8.31476	48.153
8.33766	47.483
8.36057	46.822
8.38347	46.109
8.40638	45.548
8.42928	44.918
8.45219	44.468
8.4751	43.864
8.498	43.469
8.52091	42.973
8.54381	42.66
8.56672	42.146
8.58962	41.793
8.61253	41.444
8.63544	41.17
8.65834	40.819
8.68125	40.448
8.70415	40.217
8.72706	39.928
8.74996	39.744
8.77287	39.482
8.79577	39.35
8.81868	39.153
8.84159	39.121
8.86449	38.925
8.8874	38.89
8.9103	38.771
8.93321	38.772
8.95611	38.673
8.97902	38.598
9.00193	38.558
9.02483	38.551
9.04774	38.587
9.07064	38.588
9.09355	38.682
9.11645	38.686
9.13936	38.783
9.16227	38.752
9.18517	38.828
9.20808	38.808
9.23098	38.972
9.25389	38.905
9.27679	38.936
9.2997	38.945
9.32261	39.005
9.34551	39.023
9.36842	39.087
9.39132	39.165
9.41423	39.19
9.43713	39.296
9.46004	39.327
9.48294	39.428
9.50585	39.476
9.52876	39.635
9.55166	39.572
9.57457	39.711
9.59747	39.792
9.62038	39.961
9.64328	40.098
9.66619	40.341
9.6891	40.557
9.712	40.869
9.73491	41.186
9.75781	41.512
9.78072	41.957
9.80362	42.388
9.82653	42.91
9.84944	43.341
9.87234	43.895
9.89525	44.484
9.91815	45.079
9.94106	45.665
9.96396	46.31
9.98687	46.959
10.0098	47.625
10.0327	48.198
10.0556	48.812
10.0785	49.383
10.1014	49.97
10.1243	50.431
10.1472	50.812
10.1701	51.223
10.193	51.551
10.2159	51.875
10.2388	52.096
10.2617	52.386
10.2846	52.503
10.3075	52.693
10.3305	52.7
10.3534	52.776
10.3763	52.712
10.3992	52.677
10.4221	52.556
10.445	52.318
10.4679	52.157
10.4908	51.905
10.5137	51.778
10.5366	51.491
10.5595	51.314
10.5824	51.004
10.6053	50.84
10.6282	50.512
10.6511	50.331
10.674	50.053
10.6969	49.922
10.7199	49.672
10.7428	49.417
10.7657	49.306
10.7886	49.199
10.8115	49.103
10.8344	48.989
10.8573	49.018
10.8802	48.951
10.9031	49.056
10.926	48.985
10.9489	49.075
10.9718	49.071
10.9947	49.177
11.0176	49.115
11.0405	49.128
11.0634	49.136
11.0863	49.147
11.1092	49.12
11.1322	49.07
11.1551	49.025
11.178	48.94
11.2009	48.826
11.2238	48.581
11.2467	48.398
11.2696	48.114
11.2925	47.927
11.3154	47.462
11.3383	47.108
11.3612	46.723
11.3841	46.285
11.407	45.804
11.4299	45.369
11.4528	44.87
11.4757	44.383
11.4986	43.835
11.5215	43.262
11.5445	42.729
11.5674	42.204
11.5903	41.74
11.6132	41.053
11.6361	40.545
11.659	40.034
11.6819	39.598
11.7048	39.132
11.7277	38.787
11.7506	38.375
11.7735	38.156
11.7964	37.858
11.8193	37.65
11.8422	37.494
11.8651	37.447
11.888	37.515
11.9109	37.49
11.9339	37.702
11.9568	37.938
11.9797	38.402
12.0026	38.924
12.0255	39.685
12.0484	40.639
12.0713	41.827
12.0942	43.318
12.1171	45.096
12.14	47.395
12.1629	50.063
12.1858	53.339
12.2087	56.838
12.2316	61.113
12.2545	65.716
12.2774	70.887
12.3003	76.814
12.3232	82.929
12.3462	90.213
12.3691	97.435
12.392	106.029
12.4149	114.195
12.4378	124.275
12.4607	133.652
12.4836	144.905
12.5065	156.108
12.5294	168.315
12.5523	182.169
12.5752	195.983
12.5981	213.157
12.621	229.784
12.6439	251.401
12.6668	272.6
12.6897	298.846
12.7126	324.962
12.7355	356.715
12.7585	388.277
12.7814	423.334
12.8043	460.898
12.8272	498.215
12.8501	538.391
12.873	576.743
12.8959	618.602
12.9188	657.578
12.9417	699.647
12.9646	736.501
12.9875	776.497
13.0104	808.877
13.0333	844.015
13.0562	871.685
13.0791	896.961
13.102	917.994
13.1249	934.259
13.1479	947.437
13.1708	954.597
13.1937	958.497
13.2166	957.577
13.2395	952.015
13.2624	942.358
13.2853	927.388
13.3082	910.795
13.3311	889.3
13.354	866.272
13.3769	838.79
13.3998	810.721
13.4227	783.328
13.4456	754.146
13.4685	724.847
13.4914	695.089
13.5143	665.133
13.5372	633.611
13.5602	603.553
13.5831	571.146
13.606	542.135
13.6289	512.888
13.6518	484.377
13.6747	455.323
13.6976	429.514
13.7205	405.328
13.7434	381.856
13.7663	360.102
13.7892	338.975
13.8121	319.286
13.835	300.298
13.8579	281.039
13.8808	263.958
13.9037	247.021
13.9266	232.954
13.9495	217.432
13.9725	203.013
13.9954	190.434
14.0183	178.788
14.0412	168.237
14.0641	157.686
14.087	148.72
14.1099	139.947
14.1328	132.543
14.1557	124.069
14.1786	117.259
14.2015	110.336
14.2244	104.791
14.2473	98.394
14.2702	92.417
14.2931	87.231
14.316	82.543
14.3389	78.185
14.3619	73.935
14.3848	70.339
14.4077	66.552
14.4306	63.82
14.4535	59.929
14.4764	57.257
14.4993	53.988
14.5222	51.881
14.5451	48.93
14.568	46.267
14.5909	43.775
14.6138	41.58
14.6367	39.643
14.6596	37.629
14.6825	36.06
14.7054	34.175
14.7283	32.883
14.7512	31.011
14.7742	29.733
14.7971	28.168
14.82	27.189
14.8429	25.657
14.8658	24.412
14.8887	23.158
14.9116	22.097
14.9345	21.056
14.9574	20.096
14.9803	19.299
15.0032	18.398
15.0261	17.758
15.049	16.834
15.0719	16.253
15.0948	15.435
15.1177	14.989
15.1406	14.207
15.1635	13.656
15.1865	13.062
15.2094	12.584
15.2323	12.087
15.2552	11.666
15.2781	11.27
15.301	10.884
15.3239	10.574
15.3468	10.172
15.3697	9.873
15.3926	9.504
15.4155	9.281
15.4384	8.915
15.4613	8.678
15.4842	8.39
15.5071	8.157
15.53	7.923
15.5529	7.743
15.5759	7.546
15.5988	7.366
15.6217	7.215
15.6446	7.066
15.6675	6.953
15.6904	6.836
15.7133	6.79
15.7362	6.699
15.7591	6.652
15.782	6.626
15.8049	6.677
15.8278	6.708
15.8507	6.832
15.8736	6.917
15.8965	7.059
15.9194	7.178
15.9423	7.328
15.9652	7.488
15.9882	7.677
16.0111	7.82
16.034	7.948
16.0569	8.081
16.0798	8.187
16.1027	8.29
16.1256	8.375
16.1485	8.438
16.1714	8.45
16.1943	8.466
16.2172	8.424
16.2401	8.371
16.263	8.295
16.2859	8.214
16.3088	8.076
16.3317	7.913
16.3546	7.753
16.3775	7.573
16.4005	7.405
16.4234	7.211
16.4463	7.009
16.4692	6.825
16.4921	6.641
16.515	6.464
16.5379	6.306
16.5608	6.128
16.5837	5.97
16.6066	5.829
16.6295	5.69
16.6524	5.572
16.6753	5.468
16.6982	5.402
16.7211	5.336
16.744	5.309
16.7669	5.251
16.7899	5.226
16.8128	5.223
16.8357	5.228
16.8586	5.23
16.8815	5.264
16.9044	5.266
16.9273	5.289
16.9502	5.329
16.9731	5.357
16.996	5.344
17.0189	5.347
17.0418	5.332
17.0647	5.305
17.0876	5.242
17.1105	5.161
17.1334	5.06
17.1563	4.958
17.1792	4.861
17.2022	4.719
17.2251	4.592
17.248	4.456
17.2709	4.359
17.2938	4.211
17.3167	4.095
17.3396	3.96
17.3625	3.871
17.3854	3.779
17.4083	3.684
17.4312	3.614
17.4541	3.544
17.477	3.522
17.4999	3.479
17.5228	3.447
17.5457	3.429
17.5686	3.443
17.5915	3.43
17.6145	3.438
17.6374	3.436
17.6603	3.406
17.6832	3.321
17.7061	3.201
17.729	3.027
17.7519	2.831
17.7748	2.633
17.7977	2.415
17.8206	2.246
17.8435	2.079
17.8664	1.964
17.8893	1.89
17.9122	1.844
17.9351	1.836
17.958	1.839
17.9809	1.867
18.0039	1.894
18.0268	1.92
18.0497	1.933
18.0726	1.937
18.0955	1.948
18.1184	1.966
18.1413	1.982
18.1642	2.02
18.1871	2.055
18.21	2.077
18.2329	2.078
18.2558	2.062
18.2787	2.084
18.3016	2.073
18.3245	2.102
18.3474	2.078
18.3703	2.071
18.3932	2.076
18.4162	2.088
18.4391	2.095
18.462	2.1
18.4849	2.131
18.5078	2.151
18.5307	2.169
18.5536	2.174
18.5765	2.175
18.5994	2.176
18.6223	2.238
18.6452	2.234
18.6681	2.226
18.691	2.256
18.7139	2.26
18.7368	2.261
18.7597	2.268
18.7826	2.273
18.8055	2.28
18.8285	2.263
18.8514	2.242
18.8743	2.222
18.8972	2.21
18.9201	2.175
18.943	2.117
18.9659	2.069
18.9888	2.024
19.0117	1.985
19.0346	1.919
19.0575	1.887
19.0804	1.824
19.1033	1.783
19.1262	1.723
19.1491	1.681
19.172	1.639
19.1949	1.6
19.2179	1.58
19.2408	1.553
19.2637	1.526
19.2866	1.529
19.3095	1.52
19.3324	1.499
19.3553	1.501
19.3782	1.508
19.4011	1.511
19.424	1.509
19.4469	1.517
19.4698	1.543
19.4927	1.539
19.5156	1.522
19.5385	1.525
19.5614	1.508
19.5843	1.541
19.6072	1.547
19.6302	1.553
19.6531	1.54
19.676	1.565
19.6989	1.555
19.7218	1.549
19.7447	1.556
19.7676	1.537
19.7905	1.54
19.8134	1.526
19.8363	1.495
19.8592	1.486
19.8821	1.47
19.905	1.438
19.9279	1.428
19.9508	1.432
19.9737	1.423
19.9966	1.415
20.0196	1.407
20.0425	1.384
20.0654	1.367
20.0883	1.357
20.1112	1.316
20.1341	1.302
20.157	1.284
20.1799	1.252
20.2028	1.24
20.2257	1.228
20.2486	1.207
20.2715	1.204
20.2944	1.191
20.3173	1.164
20.3402	1.158
20.3631	1.149
20.386	1.116
20.4089	1.1
20.4319	1.106
20.4548	1.067
20.4777	1.028
20.5006	1.038
20.5235	1.044
20.5464	1.009
20.5693	1.003
20.5922	1
20.6151	0.971
20.638	0.978
20.6609	0.948
20.6838	0.921
20.7067	0.891
20.7296	0.87
20.7525	0.839
20.7754	0.821
20.7983	0.828
20.8212	0.812
20.8442	0.8
20.8671	0.794
20.89	0.745
20.9129	0.723
20.9358	0.722
20.9587	0.668
20.9816	0.688
21.0045	0.662
21.0274	0.633
21.0503	0.617
21.0732	0.578
21.0961	0.557
21.119	0.518
21.1419	0.494
21.1648	0.462
21.1877	0.422
21.2106	0.394
21.2336	0.365
21.2565	0.34
21.2794	0.32
21.3023	0.318
21.3252	0.319
21.3481	0.33
21.371	0.326
21.3939	0.333
21.4168	0.332
21.4397	0.29
21.4626	0.304
21.4855	0.277
21.5084	0.291
21.5313	0.29
21.5542	0.289
21.5771	0.291
21.6	0.291
21.6229	0.277
21.6459	0.3
21.6688	0.311
21.6917	0.289
21.7146	0.299
21.7375	0.308
21.7604	0.32
21.7833	0.308
21.8062	0.299
21.8291	0.312
21.852	0.322
21.8749	0.32
21.8978	0.322
21.9207	0.321
21.9436	0.316
21.9665	0.305
21.9894	0.323
22.0123	0.319
22.0352	0.314
22.0582	0.319
22.0811	0.335
22.104	0.334
22.1269	0.334
22.1498	0.337
22.1727	0.341
22.1956	0.344
22.2185	0.325
22.2414	0.342
22.2643	0.343
22.2872	0.349
22.3101	0.357
22.333	0.353
22.3559	0.356
22.3788	0.339
22.4017	0.363

## Sheet: Fig4-S1-C
elution volume ml	mAu
0	-1.364
0.0249958	-1.207
0.0499916	-1.625
0.0749874	-1.723
0.0999832	-1.81
0.124979	-1.896
0.149975	-1.961
0.174971	-2.056
0.199966	-2.103
0.224962	-2.234
0.249958	-2.317
0.274954	-2.35
0.29995	-2.495
0.324945	-2.571
0.349941	-2.593
0.374937	-2.667
0.399933	-2.791
0.424928	-2.867
0.449924	-2.982
0.47492	-3.041
0.499916	-3.107
0.524912	-3.219
0.549907	-3.313
0.574903	-3.324
0.599899	-3.488
0.624895	-3.492
0.649891	-3.545
0.674886	-3.645
0.699882	-3.774
0.724878	-3.81
0.749874	-3.984
0.77487	-4.039
0.799865	-4.085
0.824861	-4.182
0.849857	-4.292
0.874853	-4.306
0.899849	-4.425
0.924844	-4.497
0.94984	-4.559
0.974836	-4.604
0.999832	-4.764
1.02483	-4.764
1.04982	-4.913
1.07482	-4.97
1.09981	-5.055
1.12481	-5.15
1.14981	-5.202
1.1748	-5.265
1.1998	-5.371
1.22479	-5.397
1.24979	-5.46
1.27479	-5.564
1.29978	-5.613
1.32478	-5.762
1.34977	-5.857
1.37477	-5.883
1.39976	-5.984
1.42476	-6.07
1.44976	-6.099
1.47475	-6.218
1.49975	-6.3
1.52474	-6.349
1.54974	-6.407
1.57473	-6.54
1.59973	-6.58
1.62473	-6.657
1.64972	-6.71
1.67472	-6.827
1.69971	-6.879
1.72471	-6.977
1.74971	-6.981
1.7747	-7.155
1.7997	-7.185
1.82469	-7.238
1.84969	-7.291
1.87468	-7.405
1.89968	-7.427
1.92468	-7.619
1.94967	-7.621
1.97467	-7.742
1.99966	-7.846
2.02466	-7.87
2.04965	-7.919
2.07465	-8.057
2.09965	-8.064
2.12464	-8.14
2.14964	-8.19
2.17463	-8.312
2.19963	-8.367
2.22463	-8.449
2.24962	-8.509
2.27462	-8.665
2.29961	-8.705
2.32461	-8.769
2.3496	-8.831
2.3746	-8.916
2.3996	-8.971
2.42459	-9.063
2.44959	-9.092
2.47458	-9.181
2.49958	-9.283
2.52457	-9.352
2.54957	-9.419
2.57457	-9.538
2.59956	-9.575
2.62456	-9.619
2.64955	-9.712
2.67455	-9.827
2.69955	-9.83
2.72454	-9.888
2.74954	-9.935
2.77453	-10.054
2.79953	-10.163
2.82452	-10.194
2.84952	-10.289
2.87452	-10.34
2.89951	-10.425
2.92451	-10.512
2.9495	-10.546
2.9745	-10.616
2.9995	-10.725
3.02449	-10.749
3.04949	-10.849
3.07448	-10.915
3.09948	-10.979
3.12447	-11.058
3.14947	-11.143
3.17447	-11.205
3.19946	-11.312
3.22446	-11.343
3.24945	-11.432
3.27445	-11.497
3.29944	-11.545
3.32444	-11.597
3.34944	-11.73
3.37443	-11.751
3.39943	-11.861
3.42442	-11.919
3.44942	-12.013
3.47442	-12.042
3.49941	-12.089
3.52441	-12.142
3.5494	-12.238
3.5744	-12.276
3.59939	-12.363
3.62439	-12.44
3.64939	-12.519
3.67438	-12.573
3.69938	-12.654
3.72437	-12.703
3.74937	-12.757
3.77436	-12.853
3.79936	-12.902
3.82436	-12.945
3.84935	-13.08
3.87435	-13.128
3.89934	-13.143
3.92434	-13.233
3.94934	-13.303
3.97433	-13.374
3.99933	-13.414
4.02432	-13.526
4.04932	-13.552
4.07431	-13.645
4.09931	-13.688
4.12431	-13.806
4.1493	-13.845
4.1743	-13.904
4.19929	-13.952
4.22429	-14.038
4.24928	-14.068
4.27428	-14.166
4.29928	-14.228
4.32427	-14.288
4.34927	-14.353
4.37426	-14.448
4.39926	-14.446
4.42426	-14.554
4.44925	-14.57
4.47425	-14.641
4.49924	-14.7
4.52424	-14.777
4.54923	-14.813
4.57423	-14.92
4.59923	-14.975
4.62422	-15.058
4.64922	-15.13
4.67421	-15.169
4.69921	-15.181
4.7242	-15.333
4.7492	-15.392
4.7742	-15.377
4.79919	-15.436
4.82419	-15.539
4.84918	-15.567
4.87418	-15.655
4.89918	-15.707
4.92417	-15.799
4.94917	-15.822
4.97416	-15.88
4.99916	-15.93
5.02415	-16.024
5.04915	-16.047
5.07415	-16.132
5.09914	-16.176
5.12414	-16.26
5.14913	-16.362
5.17413	-16.371
5.19912	-16.438
5.22412	-16.518
5.24912	-16.556
5.27411	-16.582
5.29911	-16.678
5.3241	-16.721
5.3491	-16.733
5.3741	-16.813
5.39909	-16.882
5.42409	-16.903
5.44908	-17.003
5.47408	-17.046
5.49907	-17.093
5.52407	-17.159
5.54907	-17.238
5.57406	-17.277
5.59906	-17.359
5.62405	-17.361
5.64905	-17.406
5.67404	-17.488
5.69904	-17.555
5.72404	-17.549
5.74903	-17.688
5.77403	-17.707
5.79902	-17.754
5.82402	-17.778
5.84902	-17.862
5.87401	-17.909
5.89901	-17.981
5.924	-17.997
5.949	-18.052
5.97399	-18.109
5.99899	-18.171
6.02399	-18.221
6.04898	-18.252
6.07398	-18.298
6.09897	-18.407
6.12397	-18.438
6.14896	-18.477
6.17396	-18.526
6.19896	-18.578
6.22395	-18.617
6.24895	-18.681
6.27394	-18.767
6.29894	-18.755
6.32394	-18.833
6.34893	-18.86
6.37393	-18.893
6.39892	-18.937
6.42392	-18.99
6.44891	-19.012
6.47391	-19.089
6.49891	-19.113
6.5239	-19.167
6.5489	-19.244
6.57389	-19.268
6.59889	-19.308
6.62388	-19.344
6.64888	-19.399
6.67388	-19.433
6.69887	-19.488
6.72387	-19.55
6.74886	-19.582
6.77386	-19.616
6.79886	-19.624
6.82385	-19.713
6.84885	-19.727
6.87384	-19.794
6.89884	-19.833
6.92383	-19.885
6.94883	-19.861
6.97383	-19.961
6.99882	-21.079
7.02382	-21.814
7.04881	-21.165
7.07381	-21.01
7.0988	-20.919
7.1238	-20.841
7.1488	-20.819
7.17379	-20.844
7.19879	-20.818
7.22378	-20.857
7.24878	-20.856
7.27378	-20.882
7.29877	-20.914
7.32377	-20.916
7.34876	-20.909
7.37376	-20.94
7.39875	-20.963
7.42375	-20.987
7.44875	-21.062
7.47374	-21.058
7.49874	-21.06
7.52373	-21.1
7.54873	-21.043
7.57372	-21.067
7.59872	-21.061
7.62372	-21.008
7.64871	-21.032
7.67371	-20.962
7.6987	-20.842
7.7237	-20.793
7.7487	-20.698
7.77369	-20.53
7.79869	-20.407
7.82368	-20.223
7.84868	-19.948
7.87367	-19.714
7.89867	-19.388
7.92367	-19.05
7.94866	-18.681
7.97366	-18.248
7.99865	-17.823
8.02365	-17.302
8.04865	-16.818
8.07364	-16.238
8.09864	-15.673
8.12363	-15.026
8.14863	-14.322
8.17362	-13.582
8.19862	-12.807
8.22362	-11.877
8.24861	-10.879
8.27361	-9.561
8.2986	-8.158
8.3236	-6.291
8.34859	-4.2
8.37359	-1.332
8.39859	1.632
8.42358	5.606
8.44858	9.787
8.47357	14.825
8.49857	19.896
8.52357	25.453
8.54856	30.888
8.57356	36.458
8.59855	41.603
8.62355	46.573
8.64854	51.362
8.67354	55.782
8.69854	59.611
8.72353	63.087
8.74853	66.012
8.77352	68.426
8.79852	70.281
8.82351	71.352
8.84851	72.048
8.87351	71.951
8.8985	71.352
8.9235	70.025
8.94849	68.558
8.97349	66.458
8.99849	64.299
9.02348	61.918
9.04848	59.531
9.07347	57.169
9.09847	54.982
9.12346	52.803
9.14846	50.98
9.17346	49.331
9.19845	47.826
9.22345	46.576
9.24844	45.55
9.27344	44.518
9.29843	43.73
9.32343	42.975
9.34843	42.322
9.37342	41.726
9.39842	41.217
9.42341	40.645
9.44841	40.163
9.47341	39.656
9.4984	39.117
9.5234	38.64
9.54839	38.129
9.57339	37.614
9.59838	37.16
9.62338	36.678
9.64838	36.18
9.67337	35.768
9.69837	35.301
9.72336	34.852
9.74836	34.537
9.77335	34.154
9.79835	33.815
9.82335	33.599
9.84834	33.327
9.87334	33.137
9.89833	33.01
9.92333	32.934
9.94833	32.863
9.97332	32.865
9.99832	32.911
10.0233	33.171
10.0483	33.458
10.0733	34.042
10.0983	34.904
10.1233	36.179
10.1483	37.594
10.1733	39.553
10.1983	41.417
10.2233	43.561
10.2483	45.502
10.2733	47.571
10.2983	49.336
10.3233	51.167
10.3483	52.764
10.3733	54.334
10.3982	55.694
10.4232	57.028
10.4482	58.167
10.4732	59.177
10.4982	60.119
10.5232	60.847
10.5482	61.435
10.5732	61.963
10.5982	62.379
10.6232	62.648
10.6482	62.896
10.6732	63.023
10.6982	63.103
10.7232	63.185
10.7482	63.134
10.7732	63.124
10.7982	63.147
10.8232	63.096
10.8482	63.184
10.8732	63.649
10.8982	64.65
10.9232	66.353
10.9482	68.591
10.9732	71.175
10.9981	74.074
11.0231	77.388
11.0481	80.827
11.0731	84.452
11.0981	88.23
11.1231	91.878
11.1481	95.221
11.1731	98.372
11.1981	101.042
11.2231	103.123
11.2481	104.772
11.2731	105.865
11.2981	106.525
11.3231	106.605
11.3481	106.326
11.3731	105.472
11.3981	104.543
11.4231	103.008
11.4481	101.446
11.4731	99.41
11.4981	97.391
11.5231	95.197
11.5481	92.998
11.5731	90.615
11.598	88.532
11.623	86.334
11.648	84.119
11.673	82.042
11.698	80.005
11.723	78.031
11.748	76.184
11.773	74.337
11.798	72.612
11.823	70.991
11.848	69.415
11.873	67.775
11.898	66.349
11.923	64.701
11.948	63.177
11.973	61.579
11.998	60.056
12.023	58.424
12.048	56.945
12.073	55.236
12.098	53.738
12.123	52.142
12.148	50.565
12.173	49.003
12.1979	47.515
12.2229	46.003
12.2479	44.48
12.2729	42.982
12.2979	41.574
12.3229	40.075
12.3479	38.724
12.3729	37.38
12.3979	36.139
12.4229	34.866
12.4479	33.692
12.4729	32.544
12.4979	31.542
12.5229	30.45
12.5479	29.625
12.5729	28.68
12.5979	27.94
12.6229	27.123
12.6479	26.496
12.6729	25.801
12.6979	25.279
12.7229	24.722
12.7479	24.223
12.7728	23.814
12.7978	23.546
12.8228	23.264
12.8478	23.109
12.8728	23.065
12.8978	23.071
12.9228	23.264
12.9478	23.584
12.9728	24.033
12.9978	24.724
13.0228	25.592
13.0478	26.558
13.0728	27.827
13.0978	29.236
13.1228	30.874
13.1478	32.629
13.1728	34.71
13.1978	36.791
13.2228	39.152
13.2478	41.504
13.2728	44.126
13.2978	46.661
13.3228	49.465
13.3478	52.075
13.3727	55.05
13.3977	57.876
13.4227	60.803
13.4477	63.726
13.4727	66.847
13.4977	69.958
13.5227	73.19
13.5477	76.574
13.5727	80.25
13.5977	84.095
13.6227	88.059
13.6477	92.723
13.6727	97.774
13.6977	103.384
13.7227	109.736
13.7477	116.745
13.7727	124.63
13.7977	133.142
13.8227	142.908
13.8477	153.628
13.8727	165.93
13.8977	179.075
13.9227	194.426
13.9477	211.123
13.9726	230.629
13.9976	251.581
14.0226	276.309
14.0476	302.78
14.0726	331.351
14.0976	361.888
14.1226	393.696
14.1476	426.786
14.1726	459.629
14.1976	491.901
14.2226	522.844
14.2476	553.195
14.2726	581.081
14.2976	606.316
14.3226	629.238
14.3476	648.695
14.3726	665.633
14.3976	677.988
14.4226	688.276
14.4476	694.795
14.4726	698.151
14.4976	698.332
14.5226	696.491
14.5476	692.306
14.5725	685.323
14.5975	676.704
14.6225	665.316
14.6475	652.871
14.6725	638.068
14.6975	622.755
14.7225	605.79
14.7475	588.279
14.7725	569.944
14.7975	551.043
14.8225	531.501
14.8475	512.274
14.8725	491.9
14.8975	471.951
14.9225	451.241
14.9475	431.118
14.9725	410.261
14.9975	391.09
15.0225	370.5
15.0475	352.683
15.0725	333.537
15.0975	316.876
15.1225	299.027
15.1474	283.94
15.1724	267.42
15.1974	253.306
15.2224	238.126
15.2474	225.3
15.2724	211.725
15.2974	200.216
15.3224	188.269
15.3474	178.127
15.3724	167.913
15.3974	158.846
15.4224	149.903
15.4474	142.042
15.4724	134.2
15.4974	127.216
15.5224	120.23
15.5474	114.116
15.5724	108.222
15.5974	102.821
15.6224	97.61
15.6474	93.243
15.6724	88.751
15.6974	84.92
15.7224	81.092
15.7473	77.815
15.7723	74.47
15.7973	71.533
15.8223	68.655
15.8473	66.129
15.8723	63.71
15.8973	61.495
15.9223	59.404
15.9473	57.519
15.9723	55.864
15.9973	54.121
16.0223	52.701
16.0473	51.294
16.0723	49.926
16.0973	48.626
16.1223	47.529
16.1473	46.274
16.1723	45.25
16.1973	44.254
16.2223	43.302
16.2473	42.354
16.2723	41.523
16.2973	40.646
16.3223	39.929
16.3472	39.128
16.3722	38.281
16.3972	37.451
16.4222	36.751
16.4472	35.942
16.4722	35.16
16.4972	34.478
16.5222	33.744
16.5472	33.072
16.5722	32.437
16.5972	31.772
16.6222	31.163
16.6472	30.546
16.6722	29.893
16.6972	29.269
16.7222	28.709
16.7472	28.061
16.7722	27.512
16.7972	26.956
16.8222	26.399
16.8472	25.91
16.8722	25.388
16.8972	24.885
16.9222	24.428
16.9471	23.97
16.9721	23.455
16.9971	23.063
17.0221	22.584
17.0471	22.217
17.0721	21.846
17.0971	21.525
17.1221	21.243
17.1471	21.022
17.1721	20.648
17.1971	20.396
17.2221	20.145
17.2471	19.939
17.2721	21.324
17.2971	21.192
17.3221	20.875
17.3471	20.611
17.3721	20.405
17.3971	20.216
17.4221	20.018
17.4471	19.887
17.4721	19.7
17.4971	19.573
17.5221	19.432
17.547	19.251
17.572	19.063
17.597	18.909
17.622	18.688
17.647	18.566
17.672	18.42
17.697	18.216
17.722	18.094
17.747	17.984
17.772	17.734
17.797	17.639
17.822	17.445
17.847	17.244
17.872	17.092
17.897	16.957
17.922	16.823
17.947	16.696
17.972	16.567
17.997	16.484
18.022	16.416
18.047	16.335
18.072	16.29
18.097	16.258
18.1219	16.153
18.1469	16.115
18.1719	16.085
18.1969	15.991
18.2219	15.981
18.2469	15.947
18.2719	15.961
18.2969	15.975
18.3219	16.048
18.3469	16.008
18.3719	16.164
18.3969	16.285
18.4219	16.332
18.4469	16.38
18.4719	16.536
18.4969	16.623
18.5219	16.733
18.5469	16.88
18.5719	17.025
18.5969	17.119
18.6219	17.334
18.6469	17.388
18.6719	17.597
18.6969	17.744
18.7218	17.865
18.7468	17.98
18.7718	18.2
18.7968	18.315
18.8218	18.463
18.8468	18.583
18.8718	18.696
18.8968	18.824
18.9218	18.94
18.9468	19.035
18.9718	19.159
18.9968	19.194
19.0218	19.31
19.0468	19.371
19.0718	19.403
19.0968	19.445
19.1218	19.494
19.1468	19.516
19.1718	19.533
19.1968	19.642
19.2218	19.731
19.2468	19.802
19.2718	19.954
19.2968	20.006
19.3217	20.079
19.3467	20.135
19.3717	20.179
19.3967	20.237
19.4217	20.253
19.4467	20.238
19.4717	20.247
19.4967	20.314
19.5217	20.339
19.5467	20.331
19.5717	20.313
19.5967	20.285
19.6217	20.274
19.6467	20.297
19.6717	20.221
19.6967	20.179
19.7217	20.159
19.7467	20.122
19.7717	20.07
19.7967	20.037
19.8217	19.916
19.8467	19.911
19.8717	19.801
19.8967	19.724
19.9216	19.572
19.9466	19.539
19.9716	19.53
19.9966	19.486
20.0216	19.422
20.0466	19.433
20.0716	19.388
20.0966	19.297
20.1216	19.259
20.1466	19.29
20.1716	19.219
20.1966	19.208
20.2216	19.218
20.2466	19.123
20.2716	19.084
20.2966	19.082
20.3216	19.017
20.3466	18.979
20.3716	18.943
20.3966	18.876
20.4216	18.833
20.4466	18.809
20.4716	18.693
20.4965	18.625
20.5215	18.622
20.5465	18.551
20.5715	18.517
20.5965	18.511
20.6215	18.409
20.6465	18.403
20.6715	18.402
20.6965	18.348
20.7215	18.314
20.7465	18.296
20.7715	18.193
20.7965	18.164
20.8215	18.134
20.8465	18.02
20.8715	17.947
20.8965	17.861
20.9215	17.823
20.9465	17.737
20.9715	17.601
20.9965	17.519
21.0215	17.487
21.0465	17.379
21.0715	17.378
21.0964	17.339
21.1214	17.227
21.1464	17.151
21.1714	17.161
21.1964	17.086
21.2214	16.945
21.2464	16.931
21.2714	16.837
21.2964	16.805
21.3214	16.746
21.3464	16.65
21.3714	16.573
21.3964	16.546
21.4214	16.517
21.4464	16.453
21.4714	16.439
21.4964	16.412
21.5214	16.377
21.5464	16.328
21.5714	16.281
21.5964	16.26
21.6214	16.253
21.6464	16.199
21.6714	16.189
21.6963	16.195
21.7213	16.141
21.7463	16.115
21.7713	16.144
21.7963	16.112
21.8213	16.042
21.8463	16.026
21.8713	15.994
21.8963	15.954
21.9213	15.937
21.9463	15.879
21.9713	15.861
21.9963	15.813
22.0213	15.785
22.0463	15.69
22.0713	15.643
22.0963	15.633
22.1213	15.567
22.1463	15.569
22.1713	15.47
22.1963	15.467
22.2213	15.446
22.2463	15.404
22.2713	15.398
22.2962	15.386
22.3212	15.335
22.3462	15.341
22.3712	15.345
22.3962	15.311
22.4212	15.299
22.4462	15.32
22.4712	15.259
22.4962	15.273
22.5212	15.306
22.5462	15.239
22.5712	15.202
22.5962	15.202
22.6212	15.149
22.6462	15.152
22.6712	15.123
22.6962	15.072
22.7212	15.083
22.7462	15.075
22.7712	15.016
22.7962	15.031
22.8212	14.973
22.8462	14.917
22.8711	14.926
22.8961	14.932
22.9211	14.872
22.9461	14.889
22.9711	14.881
22.9961	14.868
23.0211	14.845
23.0461	14.845
23.0711	14.828
23.0961	14.816
23.1211	14.774
23.1461	14.772
23.1711	14.765
23.1961	14.724
23.2211	14.705
23.2461	14.677
23.2711	14.658
23.2961	14.667
23.3211	14.719
23.3461	14.61
23.3711	14.641
23.3961	14.62
23.4211	14.578
23.4461	14.596
23.471	14.588
23.496	14.518
23.521	14.55
23.546	14.481
23.571	14.496
23.596	14.484
23.621	14.501
23.646	14.389
23.671	14.451
23.696	14.381
23.721	14.396
23.746	14.379

## Sheet: Fig4-S1-D
elution volume ml	mAu
0	-0.141
0.0312427	-0.217
0.0624854	-0.283
0.0937281	-0.32
0.124971	-0.339
0.156214	-0.406
0.187456	-0.472
0.218699	-0.485
0.249942	-0.558
0.281184	-0.574
0.312427	-0.631
0.34367	-0.66
0.374912	-0.702
0.406155	-0.741
0.437398	-0.776
0.468641	-0.8
0.499883	-0.826
0.531126	-0.868
0.562369	-0.881
0.593611	-0.909
0.624854	-0.931
0.656097	-0.961
0.687339	-0.986
0.718582	-1.006
0.749825	-1.02
0.781068	-1.059
0.81231	-1.068
0.843553	-1.092
0.874796	-1.117
0.906038	-1.121
0.937281	-1.147
0.968524	-1.166
0.999766	-1.18
1.03101	-1.191
1.06225	-1.187
1.09349	-1.184
1.12474	-1.229
1.15598	-1.223
1.18722	-1.22
1.21847	-1.237
1.24971	-1.247
1.28095	-1.267
1.31219	-1.262
1.34344	-1.274
1.37468	-1.271
1.40592	-1.282
1.43716	-1.282
1.46841	-1.303
1.49965	-1.306
1.53089	-1.286
1.56214	-1.308
1.59338	-1.306
1.62462	-1.312
1.65586	-1.326
1.68711	-1.326
1.71835	-1.317
1.74959	-1.299
1.78083	-1.31
1.81208	-1.321
1.84332	-1.3
1.87456	-1.318
1.9058	-1.324
1.93705	-1.308
1.96829	-1.303
1.99953	-1.303
2.03078	-1.317
2.06202	-1.31
2.09326	-1.308
2.1245	-1.314
2.15575	-1.309
2.18699	-1.307
2.21823	-1.31
2.24947	-1.29
2.28072	-1.302
2.31196	-1.305
2.3432	-1.299
2.37445	-1.296
2.40569	-1.286
2.43693	-1.284
2.46817	-1.281
2.49942	-1.293
2.53066	-1.292
2.5619	-1.283
2.59314	-1.282
2.62439	-1.281
2.65563	-1.278
2.68687	-1.288
2.71811	-1.273
2.74936	-1.273
2.7806	-1.282
2.81184	-1.294
2.84309	-1.28
2.87433	-1.281
2.90557	-1.287
2.93681	-1.293
2.96806	-1.275
2.9993	-1.277
3.03054	-1.292
3.06178	-1.303
3.09303	-1.318
3.12427	-1.296
3.15551	-1.301
3.18676	-1.312
3.218	-1.315
3.24924	-1.308
3.28048	-1.317
3.31173	-1.33
3.34297	-1.348
3.37421	-1.341
3.40545	-1.348
3.4367	-1.369
3.46794	-1.37
3.49918	-1.377
3.53043	-1.367
3.56167	-1.397
3.59291	-1.396
3.62415	-1.409
3.6554	-1.395
3.68664	-1.415
3.71788	-1.421
3.74912	-1.432
3.78037	-1.425
3.81161	-1.435
3.84285	-1.46
3.87409	-1.452
3.90534	-1.48
3.93658	-1.486
3.96782	-1.5
3.99907	-1.487
4.03031	-1.513
4.06155	-1.497
4.09279	-1.526
4.12404	-1.519
4.15528	-1.536
4.18652	-1.518
4.21776	-1.537
4.24901	-1.57
4.28025	-1.593
4.31149	-1.575
4.34274	-1.595
4.37398	-1.605
4.40522	-1.592
4.43646	-1.596
4.46771	-1.626
4.49895	-1.629
4.53019	-1.625
4.56143	-1.644
4.59268	-1.624
4.62392	-1.651
4.65516	-1.657
4.68641	-1.65
4.71765	-1.654
4.74889	-1.67
4.78013	-1.681
4.81138	-1.693
4.84262	-1.699
4.87386	-1.694
4.9051	-1.706
4.93635	-1.718
4.96759	-1.717
4.99883	-1.73
5.03007	-1.727
5.06132	-1.752
5.09256	-1.738
5.1238	-1.752
5.15505	-1.749
5.18629	-1.763
5.21753	-1.757
5.24877	-1.763
5.28002	-1.766
5.31126	-1.782
5.3425	-1.789
5.37374	-1.788
5.40499	-1.78
5.43623	-1.781
5.46747	-1.799
5.49872	-1.79
5.52996	-1.802
5.5612	-1.792
5.59244	-1.784
5.62369	-1.782
5.65493	-1.76
5.68617	-1.758
5.71741	-1.731
5.74866	-1.727
5.7799	-1.749
5.81114	-1.749
5.84239	-1.733
5.87363	-1.732
5.90487	-1.756
5.93611	-1.749
5.96736	-1.751
5.9986	-1.753
6.02984	-1.76
6.06108	-1.738
6.09233	-1.765
6.12357	-1.764
6.15481	-1.751
6.18605	-1.753
6.2173	-1.768
6.24854	-1.753
6.27978	-1.756
6.31103	-1.759
6.34227	-1.768
6.37351	-1.778
6.40475	-1.769
6.436	-1.766
6.46724	-1.777
6.49848	-1.781
6.52972	-1.782
6.56097	-1.807
6.59221	-1.797
6.62345	-1.821
6.6547	-1.807
6.68594	-1.82
6.71718	-1.816
6.74842	-1.84
6.77967	-1.808
6.81091	-1.819
6.84215	-1.828
6.87339	-1.818
6.90464	-1.81
6.93588	-1.778
6.96712	-1.776
6.99837	-1.744
7.02961	-1.763
7.06085	-1.727
7.09209	-1.677
7.12334	-1.653
7.15458	-1.579
7.18582	-1.523
7.21706	-1.433
7.24831	-1.319
7.27955	-1.213
7.31079	-1.056
7.34203	-0.91
7.37328	-0.689
7.40452	-0.445
7.43576	-0.111
7.46701	0.39
7.49825	0.995
7.52949	1.856
7.56073	3.18
7.59198	4.808
7.62322	6.844
7.65446	9.226
7.6857	11.659
7.71695	14.118
7.74819	16.311
7.77943	18.07
7.81068	19.54
7.84192	20.481
7.87316	21.012
7.9044	21.181
7.93565	21.041
7.96689	20.658
7.99813	20.236
8.02937	19.7
8.06062	19.239
8.09186	18.761
8.1231	18.298
8.15434	17.915
8.18559	17.543
8.21683	17.223
8.24807	16.956
8.27932	16.715
8.31056	16.54
8.3418	16.417
8.37304	16.343
8.40429	16.323
8.43553	16.362
8.46677	16.438
8.49801	16.581
8.52926	16.726
8.5605	16.875
8.59174	17.063
8.62299	17.246
8.65423	17.491
8.68547	17.701
8.71671	17.933
8.74796	18.233
8.7792	18.529
8.81044	18.864
8.84168	19.196
8.87293	19.568
8.90417	19.969
8.93541	20.411
8.96666	20.842
8.9979	21.276
9.02914	21.761
9.06038	22.263
9.09163	22.797
9.12287	23.372
9.15411	23.94
9.18535	24.576
9.2166	25.214
9.24784	25.841
9.27908	26.595
9.31032	27.252
9.34157	28.027
9.37281	28.888
9.40405	29.726
9.4353	30.682
9.46654	31.683
9.49778	32.66
9.52902	33.872
9.56027	35.039
9.59151	36.273
9.62275	37.736
9.65399	39.212
9.68524	40.836
9.71648	42.663
9.74772	44.443
9.77897	46.468
9.81021	48.524
9.84145	50.578
9.87269	53.009
9.90394	55.271
9.93518	57.818
9.96642	60.564
9.99766	63.35
10.0289	66.619
10.0601	70.042
10.0914	73.7
10.1226	78.306
10.1539	83.371
10.1851	89.296
10.2164	96.804
10.2476	105.786
10.2788	116.818
10.3101	130.091
10.3413	144.881
10.3726	163.139
10.4038	182.389
10.4351	202.822
10.4663	224.559
10.4975	245.578
10.5288	267.653
10.56	287.674
10.5913	307.016
10.6225	325.517
10.6538	341.848
10.685	356.675
10.7162	369.513
10.7475	380.824
10.7787	390.59
10.81	399.003
10.8412	406.065
10.8725	412.082
10.9037	416.986
10.9349	420.883
10.9662	423.506
10.9974	425.514
11.0287	426.561
11.0599	426.795
11.0912	426.435
11.1224	425.298
11.1536	423.795
11.1849	421.074
11.2161	417.814
11.2474	414.202
11.2786	409.068
11.3099	404.031
11.3411	397.917
11.3723	391.235
11.4036	384.776
11.4348	377.601
11.4661	369.234
11.4973	361.144
11.5286	351.955
11.5598	342.065
11.591	333.171
11.6223	322.434
11.6535	312.402
11.6848	302.68
11.716	292.039
11.7473	282.396
11.7785	271.585
11.8097	261.134
11.841	251.172
11.8722	240.215
11.9035	230.077
11.9347	220.141
11.966	210.052
11.9972	200.979
12.0284	191.868
12.0597	182.471
12.0909	174.031
12.1222	165.344
12.1534	156.429
12.1847	148.678
12.2159	140.72
12.2471	133.25
12.2784	126.361
12.3096	119.776
12.3409	113.747
12.3721	107.442
12.4034	101.659
12.4346	96.05
12.4658	90.775
12.4971	85.956
12.5283	81.194
12.5596	76.884
12.5908	72.992
12.6221	69.251
12.6533	65.577
12.6845	62.181
12.7158	59.083
12.747	55.953
12.7783	53.13
12.8095	50.545
12.8408	48.035
12.872	45.694
12.9032	43.579
12.9345	41.488
12.9657	39.513
12.997	37.658
13.0282	35.765
13.0594	34.161
13.0907	32.534
13.1219	30.978
13.1532	29.594
13.1844	28.176
13.2157	26.944
13.2469	25.661
13.2781	24.406
13.3094	23.318
13.3406	22.168
13.3719	21.106
13.4031	20.171
13.4344	19.168
13.4656	18.316
13.4968	17.493
13.5281	16.607
13.5593	15.863
13.5906	15.156
13.6218	14.379
13.6531	13.77
13.6843	13.097
13.7155	12.491
13.7468	11.94
13.778	11.394
13.8093	10.919
13.8405	10.427
13.8718	9.957
13.903	9.557
13.9342	9.137
13.9655	8.74
13.9967	8.445
14.028	8.045
14.0592	7.74
14.0905	7.49
14.1217	7.175
14.1529	6.915
14.1842	6.701
14.2154	6.438
14.2467	6.26
14.2779	6.033
14.3092	5.859
14.3404	5.698
14.3716	5.524
14.4029	5.418
14.4341	5.27
14.4654	5.146
14.4966	5.045
14.5279	4.944
14.5591	4.849
14.5903	4.78
14.6216	4.689
14.6528	4.633
14.6841	4.596
14.7153	4.53
14.7466	4.514
14.7778	4.49
14.809	4.451
14.8403	4.435
14.8715	4.385
14.9028	4.376
14.934	4.39
14.9653	4.373
14.9965	4.363
15.0277	4.387
15.059	4.392
15.0902	4.402
15.1215	4.409
15.1527	4.418
15.184	4.421
15.2152	4.453
15.2464	4.473
15.2777	4.51
15.3089	4.568
15.3402	4.596
15.3714	4.638
15.4027	4.697
15.4339	4.77
15.4651	4.844
15.4964	4.966
15.5276	5.059
15.5589	5.215
15.5901	5.374
15.6214	5.569
15.6526	5.769
15.6838	6.009
15.7151	6.269
15.7463	6.541
15.7776	6.835
15.8088	7.144
15.84	7.506
15.8713	7.855
15.9025	8.243
15.9338	8.632
15.965	9.007
15.9963	9.377
16.0275	9.773
16.0587	10.111
16.09	10.449
16.1212	10.817
16.1525	11.13
16.1837	11.445
16.215	11.745
16.2462	12.019
16.2774	12.289
16.3087	12.528
16.3399	12.793
16.3712	13.005
16.4024	13.27
16.4337	13.57
16.4649	13.869
16.4961	14.188
16.5274	14.597
16.5586	15.014
16.5899	15.562
16.6211	16.218
16.6524	16.977
16.6836	17.975
16.7148	19.181
16.7461	20.66
16.7773	22.622
16.8086	24.848
16.8398	27.54
16.8711	30.996
16.9023	34.679
16.9335	39.368
16.9648	44.578
16.996	50.435
17.0273	57.612
17.0585	65.265
17.0898	73.802
17.121	83.964
17.1522	94.479
17.1835	105.924
17.2147	118.08
17.246	130.003
17.2772	143.266
17.3085	156.124
17.3397	168.119
17.3709	181.513
17.4022	193.128
17.4334	204.154
17.4647	214.319
17.4959	222.75
17.5272	229.935
17.5584	235.47
17.5896	239.528
17.6209	242.214
17.6521	243.169
17.6834	242.683
17.7146	240.904
17.7459	237.513
17.7771	233.013
17.8083	227.584
17.8396	221.231
17.8708	214.291
17.9021	206.598
17.9333	197.976
17.9646	189.406
17.9958	180.453
18.027	170.683
18.0583	161.59
18.0895	152.204
18.1208	142.887
18.152	134.078
18.1833	124.957
18.2145	116.919
18.2457	108.61
18.277	100.363
18.3082	93.41
18.3395	85.97
18.3707	79.232
18.402	73.102
18.4332	66.861
18.4644	61.795
18.4957	56.884
18.5269	51.89
18.5582	47.659
18.5894	43.656
18.6206	39.627
18.6519	36.357
18.6831	33.008
18.7144	29.965
18.7456	27.452
18.7769	24.914
18.8081	22.785
18.8393	20.773
18.8706	18.69
18.9018	17.124
18.9331	15.47
18.9643	13.947
18.9956	12.692
19.0268	11.438
19.058	10.335
19.0893	9.397
19.1205	8.423
19.1518	7.594
19.183	6.866
19.2143	6.1
19.2455	5.493
19.2767	4.909
19.308	4.35
19.3392	3.884
19.3705	3.448
19.4017	3.073
19.433	2.722
19.4642	2.387
19.4954	2.086
19.5267	1.792
19.5579	1.541
19.5892	1.32
19.6204	1.075
19.6517	0.89
19.6829	0.727
19.7141	0.527
19.7454	0.388
19.7766	0.239
19.8079	0.09
19.8391	-0.041
19.8704	-0.173
19.9016	-0.31
19.9328	-0.424
19.9641	-0.532
19.9953	-0.642
20.0266	-0.723
20.0578	-0.803
20.0891	-0.835
20.1203	-0.86
20.1515	-0.901
20.1828	-0.897
20.214	-0.902
20.2453	-0.93
20.2765	-0.906
20.3078	-0.916
20.339	-0.932
20.3702	-0.94
20.4015	-0.936
20.4327	-0.948
20.464	-0.963
20.4952	-0.993
20.5265	-1.009
20.5577	-1.02
20.5889	-1.046
20.6202	-1.091
20.6514	-1.11
20.6827	-1.157
20.7139	-1.209
20.7452	-1.226
20.7764	-1.273
20.8076	-1.308
20.8389	-1.326
20.8701	-1.359
20.9014	-1.385
20.9326	-1.407
20.9639	-1.417
20.9951	-1.425
21.0263	-1.449
21.0576	-1.452
21.0888	-1.463
21.1201	-1.464
21.1513	-1.475
21.1826	-1.476
21.2138	-1.469
21.245	-1.479
21.2763	-1.466
21.3075	-1.493
21.3388	-1.464
21.37	-1.5
21.4013	-1.514
21.4325	-1.501
21.4637	-1.524
21.495	-1.531
21.5262	-1.527
21.5575	-1.543
21.5887	-1.55
21.6199	-1.524
21.6512	-1.573
21.6824	-1.582
21.7137	-1.57
21.7449	-1.579
21.7762	-1.584
21.8074	-1.579
21.8386	-1.591
21.8699	-1.577
21.9011	-1.582
21.9324	-1.587
21.9636	-1.574
21.9949	-1.584
22.0261	-1.58
22.0573	-1.575
22.0886	-1.565
22.1198	-1.59
22.1511	-1.564
22.1823	-1.566
22.2136	-1.566
22.2448	-1.594
22.276	-1.594
22.3073	-1.606
22.3385	-1.574
22.3698	-1.574
22.401	-1.57
22.4323	-1.58
22.4635	-1.585
22.4947	-1.597
22.526	-1.594
22.5572	-1.605
22.5885	-1.611
22.6197	-1.622
22.651	-1.629
22.6822	-1.624
22.7134	-1.649
22.7447	-1.661
22.7759	-1.667
22.8072	-1.678
22.8384	-1.706
22.8697	-1.683
22.9009	-1.726
22.9321	-1.705
22.9634	-1.725
22.9946	-1.74
23.0259	-1.765
23.0571	-1.77
23.0884	-1.776
23.1196	-1.771
23.1508	-1.806
23.1821	-1.812
23.2133	-1.813
23.2446	-1.817
23.2758	-1.827
23.3071	-1.838
23.3383	-1.845
23.3695	-1.855
23.4008	-1.853
23.432	-1.873
23.4633	-1.884
23.4945	-1.894
23.5258	-1.881
23.557	-1.87
23.5882	-1.879
23.6195	-1.898
23.6507	-1.893
23.682	-1.893
23.7132	-1.915
23.7445	-1.897
23.7757	-1.919
23.8069	-1.895
23.8382	-1.91
23.8694	-1.899
23.9007	-1.906
23.9319	-1.899
23.9632	-1.925
23.9944	-1.886
24.0256	-1.886
24.0569	-1.868
24.0881	-1.874
24.1194	-1.875
24.1506	-1.875
24.1819	-1.859
24.2131	-1.859
24.2443	-1.867
24.2756	-1.847
24.3068	-1.86
24.3381	-1.86
24.3693	-1.834
24.4005	-1.875
24.4318	-1.843
24.463	-1.827
24.4943	-1.823
24.5255	-1.849
24.5568	-1.842
24.588	-1.83
24.6192	-1.857
24.6505	-1.839
24.6817	-1.834
24.713	-1.843
24.7442	-1.839
24.7755	-1.867
24.8067	-1.856
24.8379	-1.846
24.8692	-1.858
24.9004	-1.888
24.9317	-1.864
24.9629	-1.881
24.9942	-1.886
25.0254	-1.895
25.0566	-1.905
25.0879	-1.904
25.1191	-1.935
25.1504	-1.91
25.1816	-1.935
25.2129	-1.933
25.2441	-1.929
25.2753	-1.938
25.3066	-1.961
25.3378	-1.962
25.3691	-1.962
25.4003	-1.967
25.4316	-1.977
25.4628	-1.976
25.494	-1.96
25.5253	-1.978
25.5565	-1.979
25.5878	-1.985
25.619	-1.987
25.6503	-2.004
25.6815	-1.999
25.7127	-2.006
25.744	-2.005
25.7752	-2
25.8065	-1.998
25.8377	-2.005
25.869	-2.019
25.9002	-2.007
25.9314	-2.009
25.9627	-1.995
25.9939	-2
26.0252	-2.002
26.0564	-2.008
26.0877	-1.989
26.1189	-2
26.1501	-1.985
26.1814	-2
26.2126	-2.004
26.2439	-1.995
26.2751	-2.007
26.3064	-2.02
26.3376	-2.001
26.3688	-2
26.4001	-1.994
26.4313	-2.005
26.4626	-2.016
26.4938	-2.005
26.5251	-1.988
26.5563	-2.006
26.5875	-2.002
26.6188	-2.018
26.65	-2.015
26.6813	-1.999
26.7125	-2.032
26.7438	-2.015
26.775	-2.008
26.8062	-1.995
26.8375	-2.002
26.8687	-2.001
26.9	-2.004
26.9312	-2.017
26.9625	-1.994
26.9937	-2.009
27.0249	-2.004
27.0562	-2.012
27.0874	-2.017
27.1187	-2.021
27.1499	-2.019
27.1811	-2.025
27.2124	-2.014
27.2436	-2.028
27.2749	-1.999
27.3061	-2.029
27.3374	-2.026
27.3686	-2.021
27.3998	-2.026
27.4311	-2.037
27.4623	-2.01
27.4936	-2.04
27.5248	-2.055
27.5561	-2.035
27.5873	-2.039
27.6185	-2.054
27.6498	-2.039
27.681	-2.04
27.7123	-2.049
27.7435	-2.024
27.7748	-2.049
27.806	-2.027
27.8372	-2.059
27.8685	-2.04
27.8997	-2.058
27.931	-2.038
27.9622	-2.038
27.9935	-2.046
28.0247	-2.054
28.0559	-2.054
28.0872	-2.045
28.1184	-2.044
28.1497	-2.047
28.1809	-2.037
28.2122	-2.047
28.2434	-2.066
28.2746	-2.06
28.3059	-2.054
28.3371	-2.054
28.3684	-2.039
28.3996	-2.056
28.4309	-2.054
28.4621	-2.043
28.4933	-2.054
28.5246	-2.044
28.5558	-2.03
28.5871	-2.059
28.6183	-2.037
28.6496	-2.068
28.6808	-2.047
28.712	-2.056
28.7433	-2.053
28.7745	-2.047
28.8058	-2.048
28.837	-2.067
28.8683	-2.059
28.8995	-2.047
28.9307	-2.067
28.962	-2.05
28.9932	-2.061
29.0245	-2.056
29.0557	-2.075
29.087	-2.07
29.1182	-2.056
29.1494	-2.066
29.1807	-2.081
29.2119	-2.07
29.2432	-2.079
29.2744	-2.068
29.3057	-2.055
