# Supplementary material for: Structural and functional properties of a magnesium transporter of the SLC11/NRAMP family
Source: eLife journal article supplement (doi:10.7554/elife.74589), 2022-01-10
Supplement: supp [file Figure8.xlsx]

## Sheet: Fig8B
Elen-D55A
lipid to protein ratio 50
Manganese transport
NORMALIZED DATA
		Concentration (uM)									Concentration (uM)										Concentration
		Mn									Mn										Mean	SEM	N
	Time (min)	0	50	50	50	400	400	400	400		0		50	50	50	400	400	400		Time (min)	0 μM Mn2+			50 μM Mn 2+			400 μM Mn2+
	-6.18453	93.7651	182.349	191.261	203.728	206.272	229.188	233.396	236.402		125.752		150.286	151.099	153.372	155.682	155.071	159.639		-6.18453	109.759	15.9935	2	172.016	9.55709	6	196.521	14.5232	7
	-6.11715	91.6311	181.308	188.627	200.539	203.659	208.724	224.672	227.951		122.592		143.168	143.035	160.901	138.79	153.167	148.337		-6.11715	107.112	15.4805	2	169.596	9.89333	6	186.471	14.4809	7
	-6.05075	89.7012	176.18	184.916	185.046	196.167	203.109	220.028	220.161		120.965		143.969	144.281	150.208	140.184	142.667	149.494		-6.05075	105.333	15.6319	2	164.1	8.18333	6	181.687	13.715	7
	-5.98428	88.1425	172.315	171.548	182.187	196.516	202.135	215.854	220.491		119.924		139.849	143.398	150.162	139.783	139.762	146.94		-5.98428	104.033	15.8909	2	159.91	7.20127	6	180.211	13.8159	7
	-5.91737	86.3797	168.525	170.231	182.477	196.821	205.568	210.929	218.178		118.032		141.794	141.019	149.284	137.775	140.643	146.072		-5.91737	102.206	15.8263	2	158.889	7.02781	6	179.426	13.6552	7
	-5.85097	86.8621	170.011	169.154	185.543	193.206	202.645	210.835	220.019		117.786		138.155	138.709	147.067	137.019	139.048	147.398		-5.85097	102.324	15.462	2	158.106	7.98478	6	178.595	13.6391	7
	-5.78428	86.1941	166.146	170.95	177.133	194.164	204.037	214.916	218.839		117.673		137.285	136.512	144.226	133.593	135.143	147.639		-5.78428	101.933	15.7393	2	155.376	7.39226	6	178.333	14.392	7
	-5.71762	85.6189	165.775	170.032	176.222	193.423	199.861	209.568	211.898		115.061		135.775	135.832	148.499	140.515	138.524	142.602		-5.71762	100.34	14.7213	2	155.356	7.23634	6	176.627	12.9695	7
	-5.65095	84.8766	166.407	172.027	179.122	188.023	199.722	204.362	211.331		116.727		136.164	136.036	143.095	135.767	138.524	148.024		-5.65095	100.802	15.925	2	155.475	7.86702	6	175.107	12.4978	7
	-5.5843	84.7096	164.4	171.349	179.205	186.585	204.455	204.784	212.04		111.75		133.486	132.05	139.053	136.759	136.762	144.795		-5.5843	98.2299	13.5203	2	153.257	8.49931	6	175.169	12.9996	7
	-5.51763	82.4457	163.508	167.638	179.785	185.584	201.021	200.235	211.945		114.096		130.785	130.306	137.067	135.2	135.429	147.157		-5.51763	98.2711	15.8254	2	151.515	8.73927	6	173.796	12.6358	7
	-5.45068	82.5571	162.951	167.159	173.695	183.624	197.773	202.627	207.885		114.229		132.044	131.053	133.118	131.136	135.214	146.386		-5.45068	98.393	15.8359	2	150.003	8.14455	6	172.092	12.6342	7
	-5.38428	81.3138	160.052	164.485	172.287	184.495	195.499	206.379	206.185		115.08		129.984	131.71	135.473	134.704	133.238	146.361		-5.38428	98.1971	16.8833	2	148.999	7.63266	6	172.409	12.5438	7
	-5.3176	80.7942	159.978	166.919	174.731	181.49	195.545	203.659	205.713		112.829		131.815	128.788	129.238	132.247	134.881	145.687		-5.3176	96.8115	16.0173	2	148.578	8.55764	6	171.317	12.3737	7
	-5.25088	80.6086	161.799	164.166	174.689	184.408	197.355	199.765	209.254		108.78		129.549	130.668	131.363	131.373	140.143	140.361		-5.25088	94.6941	14.0855	2	148.706	8.32407	6	171.808	12.5564	7
	-5.18423	78.3077	161.018	164.166	175.601	179.791	188.631	197.702	205.949		111.485		130.579	129.422	130.393	134.255	133.857	140.578		-5.18423	94.8965	16.5888	2	148.53	8.46476	6	168.68	11.8926	7
	-5.1173	80.5901	157.265	162.769	175.021	179.922	197.587	194.747	201.464		112.715		128.199	127.044	131.64	132.081	134.619	135.735		-5.1173	96.6526	16.0626	2	146.99	8.41995	6	168.022	12.2457	7
	-5.0509	79.6808	158.045	166.8	174.565	183.58	194.756	198.452	206.091		112.431		128.84	131.302	127.506	132.294	135.024	141.06		-5.0509	96.0561	16.3753	2	147.843	8.61362	6	170.18	12.3363	7
	-4.98423	80.3117	158.417	166.042	175.476	181.185	197.494	198.171	206.468		111.523		136.965	125.436	132.841	131.656	133.381	149.108		-4.98423	95.9175	15.6057	2	149.196	8.24841	6	171.066	12.1932	7
	-4.91758	78.7901	157.562	162.57	173.405	181.359	193.643	202.017	209.254		111.069		130.968	126.908	130.947	129.837	131.952	141.398		-4.91758	94.9296	16.1395	2	147.06	8.10264	6	169.923	13.0317	7
	-4.85065	79.4582	156.001	165.962	174.358	182.317	193.318	197.28	204.769		107.985		128.885	125.549	133.303	128.514	137.357	136.41		-4.85065	93.7215	14.2634	2	147.343	8.49356	6	168.566	12.4872	7
	-4.78423	78.4932	153.92	161.772	174.979	178.92	192.575	198.405	206.752		108.931		125.956	126.999	131.085	126.341	132.024	138.193		-4.78423	93.7121	15.2188	2	145.785	8.43853	6	167.601	12.9711	7
	-4.71757	78.4376	155.444	165.084	176.471	184.451	191.833	194.841	205.288		107.739		126.23	126.523	130.624	127.238	132.048	134.843		-4.71757	93.0882	14.6507	2	146.729	8.91678	6	167.22	12.9087	7
	-4.6509	79.4025	157.079	163.049	168.227	177.091	195.731	201.173	203.73		105.79		121.698	122.469	132.333	127.758	131.214	135.06		-4.6509	92.5962	13.1938	2	144.142	8.59811	6	167.394	13.169	7
	-4.58423	78.92	156.187	165.682	172.535	182.578	192.483	198.124	205.382		107.72		125.452	123.398	130.577	127.734	129.524	132.506		-4.58423	93.32	14.4	2	145.639	8.87968	6	166.905	13.3363	7
	-4.51758	77.1572	154.775	163.248	169.843	178.397	193.364	195.169	201.039		105.582		121.973	123.715	126.443	126.86	133.857	134.651		-4.51758	91.3695	14.2123	2	143.333	8.8632	6	166.191	12.4677	7
	-4.4509	78.0293	155.89	163.887	173.695	180.444	190.302	197.186	200.567		105.147		121.057	126.048	127.875	128.821	131.452	137.88		-4.4509	91.588	13.5586	2	144.742	9.17242	6	166.664	12.2766	7
	-4.38423	77.3798	158.343	162.211	171.375	179.051	191.183	196.764	204.769		102.838		122.431	124.009	127.113	128.892	126.524	131.205		-4.38423	90.109	12.7292	2	144.247	9.01187	6	165.484	13.272	7
	-4.31757	78.2334	157.116	162.69	170.257	177.047	194.571	199.25	204.344		106.225		125.544	122.039	123.949	126.435	128.095	132.819		-4.31757	92.2293	13.9959	2	143.599	9.00883	6	166.08	13.467	7
	-4.2509	77.1757	153.698	158.739	168.351	176.568	190.07	195.919	197.545		105.147		121.813	121.314	123.164	122.537	129.619	135.952		-4.2509	91.1612	13.9854	2	141.18	8.75142	6	164.03	12.6016	7
	-4.18425	77.0087	152.917	159.417	169.801	177.352	192.39	192.308	199.197		104.371		120.989	119.343	124.018	123.648	124.952	131.181		-4.18425	90.6898	13.6811	2	141.081	9.07107	6	163.004	13.1363	7
	-4.1175	77.8809	153.029	163.727	169.594	177.047	189.002	199.296	194.051		107.039		121.057	118.279	124.273	126.766	125.667	130.843		-4.1175	92.4598	14.579	2	141.66	9.43396	6	163.239	12.8131	7
	-4.05065	76.8974	154.181	156.744	171.417	178.397	189.559	191.932	192.115		102.706		122.522	120.068	125.658	125.49	126.238	128.94		-4.05065	89.8016	12.9042	2	141.765	8.86605	6	161.81	12.4746	7
	-3.98423	77.4726	153.809	162.729	171.044	176.916	191.23	193.715	199.339		104.882		118.036	120.317	124.342	124.096	128.167	132.361		-3.98423	91.1772	13.7045	2	141.713	9.60631	6	163.689	12.8329	7
	-3.91732	77.5469	152.991	158.14	173.571	175.087	189.049	194.512	198.914		102.403		120.279	121.563	124.827	123.789	125.524	134.096		-3.91732	89.9749	12.4281	2	141.895	9.24187	6	162.996	12.8033	7
	-3.85092	77.0458	155.964	160.176	165.742	176.786	187.471	194.231	195.94		104.636		119.158	119.298	132.079	122.75	128.714	133.325		-3.85092	90.8408	13.795	2	142.069	8.6112	6	162.745	12.4642	7
	-3.78398	76.0252	153.623	160.335	167.481	176.655	182.274	194.841	196.459		104.182		118.517	117.984	128.591	124.333	125.357	133.108		-3.78398	90.1034	14.0782	2	141.089	8.98817	6	161.861	12.4287	7
	-3.71758	77.5654	149.535	159.098	169.263	181.141	188.399	194.841	196.978		105.128		119.112	116.421	121.478	123.482	124.405	135.59		-3.71758	91.3466	13.7811	2	139.151	9.38611	6	163.548	12.8573	7
	-3.65092	77.2685	153.14	158.819	166.446	174.216	187.285	189.962	194.618		101.741		118.723	117.282	121.917	124.002	123.31	134.024		-3.65092	89.5047	12.2361	2	139.388	9.16472	6	161.06	12.2976	7
	-3.58425	75.4314	152.174	158.22	167.026	173.04	185.615	194.325	192.965		100.889		116.617	120.68	123.741	124.592	125.095	133.904		-3.58425	88.1604	12.7289	2	139.743	8.93413	6	161.362	12.1803	7
	-3.51758	75.7469	153.14	161.652	168.103	174.521	187.517	191.37	195.751		103.936		117.807	117.327	123.672	122.348	124.905	135.157		-3.51758	89.8413	14.0944	2	140.284	9.49371	6	161.653	12.4189	7
	-3.45092	77.0273	150.762	157.462	164.582	176.394	183.109	191.276	195.042		101.76		118.036	116.897	128.545	124.522	122.976	137.735		-3.45092	89.3935	12.3662	2	139.381	8.50504	6	161.579	12.068	7
	-3.38425	75.7098	150.539	156.584	168.144	176.742	187.193	191.417	195.279		101.684		120.943	117.508	123.533	119.868	124.762	141.349		-3.38425	88.6969	12.9871	2	139.542	8.78848	6	162.373	12.3559	7
	-3.31758	75.9139	152.768	159.298	165.659	178.484	183.944	192.917	191.218		103.236		119.455	116.376	120.693	123.553	123.381	137.205		-3.31758	89.5747	13.6608	2	139.042	9.20369	6	161.529	12.0966	7
	-3.25065	76.8603	150.873	157.662	169.635	171.951	185.8	192.495	196.601		103.122		118.173	115.289	120.577	122.419	124.81	132.072		-3.25065	89.9911	13.1309	2	138.702	9.59616	6	160.878	12.5635	7
	-3.18425	74.1882	150.242	156.824	166.611	168.423	186.821	191.229	191.265		103.709		116.938	117.735	123.487	119.561	124.405	129.928		-3.18425	88.9484	14.7602	2	138.639	8.91676	6	158.805	12.4784	7
	-3.11732	75.3015	152.174	154.509	164.996	175.915	181.903	188.602	195.184		101.325		118.471	113.613	122.794	121.569	124.714	130.819		-3.11732	88.313	13.0115	2	137.76	8.96143	6	159.815	12.3079	7
	-3.05092	75.784	152.806	155.507	168.227	174.216	187.193	187.617	195.892		102.157		116.64	114.541	124.711	120.104	122.357	134.217		-3.05092	88.9705	13.1865	2	138.739	9.34388	6	160.228	12.5978	7
	-2.98425	74.5407	151.245	159.457	165.12	172.169	185.708	191.135	196.176		100.814		119.455	118.573	116.559	120.931	123.476	136.048		-2.98425	87.6772	13.1364	2	138.402	9.22209	6	160.806	12.4562	7
	-2.10903	100.39	205.24	220.152	227.216	234.016	253.689	248.452	268.508		98.1268		111.215	116.625	125.312	127.545	128.476	134.53		-2.10903	99.2582	1.13147	2	167.627	22.582	6	199.317	24.7506	7
	-2.04522	101.893	204.125	212.69	223.488	230.88	250.626	253.612	266.383		100.227		112.978	115.583	119.099	121.97	128.69	135.904		-2.04522	101.06	0.8328	2	164.66	21.97	6	198.295	24.909	7
	-1.98115	100.687	200.409	215.243	219.345	228.789	252.111	246.857	266.053		99.3377		111.055	114.723	124.665	122.868	127.5	138.651		-1.98115	100.012	0.674425	2	164.24	21.4421	6	197.547	24.4123	7
	-1.91735	100.13	197.064	210.615	213.339	226.002	253.457	251.735	268.178		98.1457		113.916	115.538	118.222	123.978	124.643	127.759		-1.91735	99.1378	0.9921	2	161.449	20.5053	6	196.536	25.5656	7
	-1.85355	97.4207	194.091	209.617	221.417	229.312	246.032	249.015	263.456		98.8458		113.504	115.696	124.596	123.151	125.381	126.289		-1.85355	98.1332	0.71256	2	163.154	20.5868	6	194.662	24.9356	7
	-1.78948	98.5897	195.318	211.014	220.837	232.056	241.856	247.702	255.382		99.7162		110.826	116.376	120.231	124.38	127.214	132.723		-1.78948	99.153	0.56323	2	162.434	21.1487	6	194.473	23.6294	7
	-1.72568	98.1258	198.774	210.535	215.244	227.308	254.153	249.906	262.181		100.965		110.643	115.085	119.376	122.844	122.595	125.205		-1.72568	99.5454	1.41959	2	161.61	20.974	6	194.885	25.5376	7
	-1.66188	96.9568	197.473	210.375	217.647	227.744	241.439	246.295	261.284		98.7701		111.696	116.014	129.007	124.663	126.5	125.952		-1.66188	97.8634	0.90667	2	163.702	20.34	6	193.411	24.2226	7
	-1.59783	99.6474	195.764	210.255	219.967	224.26	246.636	249.109	260.057		98.6377		112.314	113.273	119.076	122.892	121.857	125.301		-1.59783	99.1425	0.50489	2	161.775	21.2241	6	192.873	24.9085	7
	-1.53403	95.4166	199.628	208.5	220.754	229.355	242.599	247.561	257.035		97.843		112.612	114.247	118.799	120.269	121.286	129.373		-1.53403	96.6298	1.21318	2	162.423	21.3033	6	192.497	24.5621	7
	-1.46997	98.4042	195.801	213.887	215.327	226.786	244.084	250.422	260.623		100.019		112.062	114.519	117.806	120.033	127.833	121.494		-1.46997	99.2115	0.80737	2	161.567	21.1177	6	193.039	25.0263	7
	-1.40615	98.7567	194.723	210.934	217.896	227.265	245.058	246.107	257.271		98.5809		111.902	114.768	117.529	118.876	121.976	125.036		-1.40615	98.6688	0.08792	2	161.292	21.0594	6	191.655	24.8713	7
	-1.34235	99.0907	199.182	206.345	222.37	222.605	246.543	244.418	261.284		99.754		110.803	114.451	114.942	120.34	123.595	124.024		-1.34235	99.4224	0.33164	2	161.349	21.6698	6	191.83	24.8301	7
	-1.27855	99.7031	198.216	210.654	217.854	227.221	244.965	247.702	254.533		101.097		111.215	115.062	118.014	121.427	121.167	122.265		-1.27855	100.4	0.69715	2	161.836	21.2253	6	191.326	24.8407	7
	-1.21477	97.7547	197.51	205.148	214.582	230.662	241.346	237.242	255.902		97.2753		112.634	115.108	117.76	121.474	119.69	122.072		-1.21477	97.515	0.23969	2	160.457	20.3849	6	189.77	24.4548	7
	-1.15068	97.3464	196.395	205.547	214.872	221.341	236.984	241.182	261.048		99.281		109.682	112.095	118.453	117.269	126.381	122.289		-1.15068	98.3137	0.967265	2	159.507	20.7858	6	189.499	24.2886	7
	-1.0869	96.9753	192.233	203.272	214.872	226.524	236.52	241.417	256.704		99.4134		110.918	112.548	116.305	118.001	124.667	120.53		-1.0869	98.1944	1.21905	2	158.358	20.393	6	189.195	24.3315	7
	-1.02308	98.998	192.679	209.697	213.629	222.605	244.084	243.949	257.177		98.562		114.145	115.447	116.397	118.568	119.833	123.735		-1.02308	98.78	0.217995	2	160.332	20.3322	6	189.993	24.7983	7
	-0.959033	95.1382	195.206	201.636	218.6	223.345	239.397	244.7	254.816		99.2621		117.487	111.574	119.769	120.246	121.19	125.494		-0.95903	97.2001	2.06191	2	160.712	20.1452	6	189.884	24.1555	7
	-0.895217	96.9753	195.578	209.657	217.233	224.172	235.824	242.402	250.661		98.9026		114.74	114.813	116.79	118.592	123.738	125.349		-0.89522	97.9389	0.963615	2	161.468	20.7779	6	188.677	23.5789	7
	-0.0636	98.6454	99.7399	103.192	102.403	99.2596	101.346	101.454	101.605		101.76		103.433	103.488	103.002	101.819	102.643	100.289		-0.0636	100.203	1.55715	2	102.543	0.58297	6	101.202	0.417187	7
	0	100	100	100	100	100	100	100	100		100		100	100	100	100	100	100		0	100	0	2	100	0	6	100	0	7
	0.0638167	98.7938	99.2196	99.162	97.763	97.8223	98.5615	99.4371	98.3003		101.987		100.275	99.0034	99.3533	101.488	98.619	97.5663		0.063817	100.39	1.59648	2	99.1294	0.329336	6	98.8278	0.498685	7
	0.127867	99.2763	96.4326	99.0822	97.2659	97.6481	99.3503	100.281	98.1114		99.8108		99.0158	101.993	98.3141	99.055	100.738	101.133		0.127867	99.5435	0.267245	2	98.684	0.783926	6	99.4738	0.497179	7
	0.191933	97.9217	96.9156	99.0024	100.041	97.0819	99.1183	99.4371	98.1586		100.303		99.8398	98.6863	99.5612	99.8819	98.7381	94.1205		0.191933	99.1122	1.1905	2	99.0078	0.467165	6	98.0766	0.744504	7
	0.255733	97.5135	96.767	97.1269	96.106	97.4303	98.0046	98.546	96.4589		100.019		101.213	100.68	102.125	98.8188	96.9762	92.1928		0.255733	98.7662	1.25273	2	99.0029	1.07008	6	96.9182	0.848648	7
	0.319533	99.332	98.7365	98.9625	95.8989	96.1672	98.6543	98.5929	97.0727		100.53		103.113	101.087	101.016	97.6612	98	93.494		0.319533	99.9309	0.598915	2	99.8024	1.01917	6	97.0918	0.683881	7
	0.383583	98.3114	97.6217	97.6856	95.2361	95.4268	98.1439	98.0769	98.1586		98.9215		99.1531	99.932	99.1224	98.8897	96.5952	97.7349		0.383583	98.6164	0.30505	2	98.1252	0.685792	6	97.5752	0.44306	7
	0.44765	98.3856	96.544	97.8851	95.2361	94.9913	96.0557	96.8105	96.5061		101.173		100.641	98.9581	97.9446	96.3383	95.8333	92.1446		0.44765	99.7793	1.39375	2	97.8681	0.765139	6	95.5257	0.604849	7
	0.51145	98.4413	95.9123	96.4485	95.6918	96.1237	95.174	95.6848	95.9396		100.038		103.456	98.7316	97.0439	97.8975	95.9048	92.2651		0.51145	99.2395	0.798265	2	97.8807	1.20038	6	95.5699	0.637423	7
	0.57525	95.9362	96.99	96.4884	95.9403	94.5557	95.6845	95.8255	95.8451		99.9432		98.8098	97.282	96.3972	96.5273	94.6905	91.494		0.57525	97.9397	2.00353	2	96.9846	0.41237	6	94.9461	0.631736	7
	0.6393	96.9568	95.2062	97.1269	94.7804	94.5122	96.7517	95.3096	94.051		98.3917		99.8169	97.5764	93.9954	93.6215	93.3095	91.7349		0.6393	97.6742	0.717455	2	96.4171	0.883478	6	94.1844	0.598899	7
	0.703383	96.8269	97.1758	93.0966	94.4905	93.1185	94.3387	92.4484	93.2483		101.06		98.3749	95.7418	100.6	96.8344	93.2143	91.1084		0.703383	98.9432	2.11637	2	96.58	1.10972	6	93.473	0.671399	7
	0.767183	96.1032	96.0609	96.2889	93.372	95.1655	96.4269	93.3865	90.8404		98.7701		99.7711	95.8777	96.7436	94.8972	89.9048	91.3253		0.767183	97.4366	1.33346	2	96.3524	0.837412	6	93.1352	0.939895	7
	0.83125	97.532	94.5002	95.1716	93.5377	93.6847	93.1787	92.2139	90.9821		100.435		98.8327	97.5538	97.552	96.5273	91.7143	88.2892		0.83125	98.9836	1.45159	2	96.1913	0.849037	6	92.37	0.959902	7
	0.895033	96.4372	95.1691	95.6504	90.9693	92.2474	94.478	95.6379	91.8319		99.0539		105.516	93.7939	96.6975	91.3773	90.1905	93.7108		0.895033	97.7456	1.30837	2	96.2994	2.01239	6	92.782	0.720002	7
	0.95885	96.5485	96.1724	93.0966	91.9635	91.899	95.174	93.4803	91.3126		99.8108		99.588	96.2401	92.4711	95.4878	90.0238	92.5542		0.95885	98.1797	1.63114	2	94.922	1.1995	6	92.8474	0.757494	7
	1.02292	95.8619	94.7232	93.8148	92.7092	89.6777	92.1578	94.2777	91.5014		99.0728		97.528	95.3567	96.2125	91.4954	91.2619	92.4819		1.02292	97.4674	1.60546	2	95.0574	0.699942	6	91.8363	0.527761	7
	1.0867	96.5114	92.7536	93.0168	93.8277	93.554	91.2297	93.9024	89.9906		100.019		97.116	97.3726	95.3349	93.0782	92.8571	94.1928		1.0867	98.2652	1.75375	2	94.9036	0.826982	6	92.6864	0.57885	7
	1.15052	94.5444	93.6083	94.6528	93.8691	92.4216	90.5336	90.7598	90.9348		101.022		100.481	96.5345	95.9122	93.6924	91.1905	94.506		1.15052	97.7831	3.23868	2	95.843	1.03759	6	92.0055	0.593617	7
	1.21457	96.697	94.3515	93.1365	90.3065	91.8118	93.5499	93.0113	90.8404		98.5241		99.3362	94.0204	93.2102	93.2436	88.2143	95.3494		1.21457	97.6106	0.91357	2	94.0602	1.20539	6	92.2887	0.86352	7
	1.27837	96.0661	94.5373	91.4605	92.7092	92.5523	92.1578	92.7298	90.5571		97.3888		99.5422	94.564	95.3349	92.464	90.5952	94.9398		1.27837	96.7275	0.66139	2	94.6914	1.13067	6	92.2851	0.560741	7
	1.34243	96.2516	93.6455	93.5754	94.0762	88.5453	92.3434	91.9325	89.0935		100.246		98.6496	95.3114	95.4734	92.2514	88.7143	96.1205		1.34243	98.2488	1.99719	2	95.1219	0.780361	6	91.2858	1.03248	7
	1.40623	94.5816	92.5678	92.8172	92.2535	90.7666	91.8329	90.7598	87.9131		98.2592		98.9242	94.2242	98.2448	94.0468	88.7143	96.4578		1.40623	96.4204	1.83883	2	94.8386	1.21925	6	91.4988	1.12216	7
	1.4703	96.4557	92.9023	92.8172	91.9221	91.9861	92.4362	88.9306	86.119		99.3567		98.146	95.8097	93.5335	93.1254	89.1429	95.0361		1.4703	97.9062	1.45046	2	94.1885	0.955523	6	90.968	1.14841	7
	1.53435	94.7486	91.8246	93.8947	93.082	90.2003	91.3689	90.5253	87.1577		98.1079		97.6425	94.2695	93.4873	90.8575	89.4048	96.4337		1.53435	96.4282	1.67965	2	94.0334	0.799638	6	90.8498	1.06566	7
	1.59815	96.1774	91.5645	92.5778	90.8451	91.2021	91.1833	90.8068	88.2908		101.835		97.1847	93.9298	94.5497	92.2277	89.6905	96.8675		1.59815	99.0064	2.829	2	93.4419	0.939657	6	91.4669	1.01857	7
	1.66222	95.7506	91.5645	92.7773	91.3836	89.7213	89.7448	88.2739	86.8272		99.5459		98.3749	95.9003	94.9885	92.8656	89	95.8072		1.66222	97.6482	1.89764	2	94.1649	1.12305	6	90.32	1.14858	7
	1.72603	95.8063	93.3854	92.897	90.2237	90.8972	92.1578	88.9306	87.6298		98.9026		97.2534	96.1721	97.5058	91.9915	88.8095	93.1807		1.72603	97.3544	1.54814	2	94.5729	1.17585	6	90.5139	0.784888	7
	1.79008	95.398	93.6826	92.7773	90.058	89.8955	88.5383	89.728	87.3938		99.7162		99.4965	92.5708	92.448	90.5032	88.4048	96.7711		1.79008	97.5571	2.15907	2	93.5055	1.29525	6	90.1764	1.16947	7
	1.8539	95.1939	93.6455	94.6129	91.0108	89.1551	90.58	89.728	85.1747		98.6755		97.8714	93.205	92.4942	93.2436	86.4524	93.1566		1.8539	96.9347	1.7408	2	93.8066	0.950428	6	89.6415	1.16065	7
	1.91795	95.4908	92.1962	91.1014	91.0936	92.9443	90.0696	88.2739	84.4665		96.9158		97.8027	94.6999	93.0947	91.4718	89.6429	93.8554		1.91795	96.2033	0.712495	2	93.3314	1.05184	6	90.1035	1.18879	7
	1.98175	95.732	92.8651	90.3432	88.9809	89.7648	88.9559	88.6023	85.7885		98.1268		100.114	91.8007	91.8245	87.0305	87.3571	92.7229		1.98175	96.9294	1.19736	2	92.6548	1.59112	6	88.6031	0.850691	7
	2.04555	93.7836	91.0814	91.2211	90.7622	88.284	89.3271	89.8687	84.3248		98.9026		98.0774	93.205	94.5035	91.5899	86.9048	90.747		2.04555	96.3431	2.55946	2	93.1417	1.15202	6	88.7209	0.936505	7
	2.10987	95.7692	92.7165	91.6999	89.7266	88.1098	88.9559	88.8837	84.8442		97.5591		97.2992	92.7746	96.7667	90.2906	87.9048	88.1687		2.10987	96.6641	0.894985	2	93.4972	1.20726	6	88.1654	0.631677	7
	2.17367	95.5279	92.7908	91.9393	88.4424	89.0244	88.7703	88.743	80.5949		96.7833		99.3133	93.2503	92.0323	90.8339	85.8095	88.6506		2.17367	96.1556	0.62771	2	92.9614	1.4467	6	87.4895	1.2767	7
	2.23773	94.9156	90.7841	90.9816	90.5551	88.3711	87.6102	90.0563	82.7195		100.927		95.5367	92.0045	93.3718	90.5268	87.1667	87.8795		2.23773	97.9214	3.00582	2	92.2057	0.790356	6	87.7614	0.964815	7
	2.30153	95.6578	91.6016	89.8244	91.9635	89.3293	89.42	86.6792	83.2861		100.435		96.9787	92.5255	92.4711	91.9442	82.8095	88.4096		2.30153	98.0465	2.38869	2	92.5608	0.971111	6	87.4111	1.2723	7
	2.36533	94.9156	93.9056	91.9792	89.3538	86.2369	89.42	87.3358	81.8225		99.8865		96.5209	93.6353	91.7321	92.5348	87.2143	84.4819		2.36533	97.401	2.48545	2	92.8545	0.990594	6	87.0066	1.29448	7
	2.42913	96.3258	93.4225	91.4206	90.9279	88.1098	88.3527	87.9456	79.8867		97.8619		97.4594	92.5481	95.7506	91.6608	87.4524	85.3012		2.42913	97.0939	0.76801	2	93.5882	1.04158	6	86.9584	1.37456	7
	2.49295	94.3589	94.7603	91.1812	89.8509	88.4582	87.935	89.1651	82.0585		99.6405		96.7956	91.1665	93.9723	91.0938	86.5714	86.6506		2.49295	96.9997	2.6408	2	92.9545	1.08051	6	87.419	1.0684	7
	2.557	94.897	93.0137	91.1812	89.5609	86.8902	88.4455	87.8518	81.2559		95.8373		96.1089	91.6874	94.642	90.4559	87.0714	86		2.557	95.3671	0.470135	2	92.699	0.977702	6	86.853	1.07592	7
	2.6208	95.5279	93.7941	91.6999	88.4424	89.7648	88.8167	87.3358	84.3248		99.1675		94.9874	93.137	90.8083	90.4796	85.7857	87.0361		2.6208	97.3477	1.81977	2	92.1449	0.957026	6	87.6491	0.828768	7
	2.6846	94.6372	91.3043	92.1788	89.3538	87.4129	88.4455	88.227	83.3333		96.5374		96.4981	90.4417	92.2633	93.0546	87.2381	86.0964		2.6846	95.5873	0.950075	2	92.0066	1.00413	6	87.6868	1.10668	7
	2.74867	94.897	91.6016	90.423	89.3123	87.892	88.2135	88.4615	82.814		96.4995		95.1019	94.3148	91.7552	89.2511	86.8571	84.241		2.74867	95.6983	0.80126	2	92.0848	0.91042	6	86.8186	0.904972	7
	2.81273	94.1733	90.3753	90.9417	89.4366	89.5035	88.3063	88.7899	81.8697		97.8619		95.697	92.9105	90.0231	88.5424	85.9286	88.0241		2.81273	96.0176	1.84428	2	91.564	0.959076	6	87.2806	0.994292	7
	2.8768	93.0599	93.1252	91.1413	89.8094	86.0192	87.935	87.9925	81.9641		95.9508		96.1089	92.8652	93.1178	88.8495	86.9762	88.0723		2.8768	94.5054	1.44543	2	92.6946	0.871559	6	86.8298	0.880339	7
	2.9406	94.4331	93.1252	89.6249	90.1408	86.1934	87.5174	87.8518	78.848		97.843		100.732	91.6195	90.8776	87.503	85.5952	89.1084		2.9406	96.138	1.70493	2	92.6867	1.68516	6	86.0882	1.28129	7
	3.0044	94.0434	92.0104	89.6648	88.8981	88.1969	89.6056	87.5704	83.711		97.1618		93.7972	91.3477	94.5958	87.1486	86	88.1205		3.0044	95.6026	1.55918	2	91.719	0.912784	6	87.1933	0.713476	7
	3.06845	95.0826	92.1962	89.6648	88.691	86.716	86.6821	84.2402	80.9254		96.4049		94.6212	90.487	90.9469	87.1486	86.0952	87.8072		3.06845	95.7438	0.66117	2	91.1012	0.853677	6	85.6593	0.894537	7
	3.13227	94.2847	92.605	90.0239	90.1408	87.4129	87.007	86.8668	81.728		96.8212		95.3765	90.3058	91.7783	89.9126	83.5238	86.8434		3.13227	95.5529	1.26827	2	91.7051	0.847068	6	86.1849	1.02264	7
	3.19607	94.1362	92.1962	90.2235	88.1939	88.0226	88.9095	85.6942	81.5392		97.5024		95.9487	91.778	92.448	87.3848	84.3095	87.3253		3.19607	95.8193	1.68308	2	91.7981	1.05323	6	86.1693	0.96214	7
	3.26012	94.0434	92.6421	90.2634	88.4838	85.1916	88.6311	85.9756	83.0973		95.175		95.491	91.325	91.6859	90.7631	83.8095	87.8795		3.26012	94.6092	0.5658	2	91.6485	0.962488	6	86.4782	1.03991	7
	3.32418	92.1692	91.3415	90.5028	86.9925	85.5836	87.3782	86.0694	80.17		97.597		93.843	90.872	92.5173	88.4479	83.8571	90.0482		3.32418	94.8831	2.71387	2	91.0115	0.945585	6	85.9363	1.22485	7
	3.38798	94.9341	91.7503	90.9018	87.9867	87.892	86.6357	85.3659	80.17		95.4399		94.5754	91.3703	91.2933	88.8259	82.7143	88.0964		3.38798	95.187	0.252895	2	91.313	0.857736	6	85.6714	1.20313	7
	3.45178	95.0455	91.2672	90.9816	90.1408	85.4965	88.9095	84.9437	79.8867		97.4078		95.2392	91.7554	93.1409	88.5188	83.3571	87.4699		3.45178	96.2266	1.18115	2	92.0875	0.749185	6	85.5117	1.20542	7
	3.51585	93.6723	93.8685	91.1014	87.6139	85.0174	87.471	86.773	81.4448		95.8562		95.8572	90.9853	89.1224	88.3298	84.6905	87.2771		3.51585	94.7643	1.09195	2	91.4248	1.23476	6	85.8576	0.887867	7
	3.5799	94.3218	90.301	88.1883	88.8981	86.9774	85.9397	85.272	80.2172		96.9915		95.0332	91.4609	90	88.3298	84.2381	87.0602		3.5799	95.6566	1.33486	2	90.6469	0.992356	6	85.4335	1.00403	7
	3.64398	94.9898	91.4902	88.5475	87.034	85.1916	86.4965	85.6473	81.5864		98.2403		93.5454	89.3092	91.0855	89.6055	84.2857	88.0482		3.64398	96.615	1.62525	2	90.1686	0.951886	6	85.8373	0.981403	7
	3.70777	94.1919	91.8618	88.7071	87.5725	86.5418	86.9142	84.5216	79.4145		95.1183		94.5525	90.872	97.5058	89.2747	86.2143	84.8434		3.70777	94.6551	0.463195	2	91.8453	1.51022	6	85.3892	1.15655	7
	3.77183	94.8042	93.9799	90.5826	84.4656	85.8885	87.1462	85.8349	81.9169		96.3482		94.5525	90.6002	96.6051	89.7708	84.381	87.3012		3.77183	95.5762	0.771965	2	91.7977	1.75245	6	86.0342	0.932874	7
	3.8359	95.2125	91.23	89.3855	83.0572	86.1498	86.5893	84.9437	80.406		96.1779		95.0332	89.7395	93.903	88.0463	84.2143	86.5301		3.8359	95.6952	0.482695	2	90.3914	1.73021	6	85.2685	0.934645	7
	3.89997	94.3403	90.4496	89.9441	83.7614	87.892	85.9861	83.4428	79.3201		94.1722		95.0332	90.9626	90.739	87.2195	83.6905	84.7711		3.89997	94.2563	0.084065	2	90.1483	1.48098	6	84.6174	1.08771	7
	3.96403	94.7114	90.7098	89.8244	84.9213	86.9774	87.6566	84.334	79.3673		95.3642		93.7514	93.6806	89.9076	86.558	83.2857	84.6988		3.96403	95.0378	0.326395	2	90.4659	1.32482	6	84.6968	1.06851	7
	4.02783	93.8579	91.3415	88.6273	84.9627	84.5383	87.6566	85.4597	79.6034		95.9886		93.7743	91.5968	90.6005	87.0777	82.2619	86.4337		4.02783	94.9233	1.0654	2	90.1505	1.23933	6	84.7188	1.09023	7
	4.09188	95.6578	91.6016	88.8268	83.4714	85.6272	85.5684	83.2552	81.6336		97.2375		95.3765	91.4383	96.2818	88.6369	84.1429	86.4819		4.09188	96.4476	0.78982	2	91.1661	1.90475	6	85.0494	0.862364	7
	4.1557	94.0805	90.0409	91.2211	85.1698	85.3659	85.7077	83.2083	81.6808		96.7455		94.3008	90.8267	89.6998	88.8495	84.4524	85.8072		4.1557	95.413	1.33249	2	90.2098	1.20871	6	85.0102	0.854002	7
	4.21948	94.6929	90.8584	87.5499	85.2527	86.2805	86.5429	85.6942	80.406		96.4049		94.2321	91.1665	93.8568	87.2903	82.1667	84.7952		4.21948	95.5489	0.856015	2	90.4861	1.43766	6	84.7394	0.956763	7
	4.28355	93.5424	90.9699	88.6672	83.9271	83.7979	87.007	84.6154	79.9339		96.3671		96.9329	89.4904	92.2171	87.8809	82.5476	85.6145		4.28355	94.9547	1.41234	2	90.3674	1.75146	6	84.4853	1.02497	7
	4.34735	92.6888	92.3077	88.0287	84.0928	86.324	85.9861	83.6304	78.2342		96.6887		94.873	89.8754	91.6397	88.5897	83.4524	83.4217		4.34735	94.6888	1.99996	2	90.1362	1.53237	6	84.2341	1.23484	7
	4.4114	94.2104	92.8279	89.984	83.9685	85.5401	86.6357	82.7392	79.4145		97.0861		95.079	91.3703	90.9238	84.6917	82.3571	82.1928		4.4114	95.6483	1.43783	2	90.6923	1.52783	6	83.3673	0.920357	7
	4.47547	93.4311	90.7098	87.7494	82.7258	86.4983	87.4246	82.5516	80.7365		95.4021		95.9945	91.5742	92.7252	87.4321	82.2619	81.4217		4.47547	94.4166	0.98551	2	90.2465	1.86152	6	84.0467	1.1143	7
	4.53927	95.1197	90.2267	89.2259	85.3355	84.4512	84.8724	83.2083	77.762		96.6131		97.0932	89.8528	91.7321	86.18	82.2143	82.1928		4.53927	95.8664	0.746685	2	90.5777	1.5678	6	82.983	1.02899	7
	4.60333	92.4105	91.9732	88.9864	84.4242	85.1481	85.522	83.6304	79.6978		97.8808		96.9787	92.684	88.8222	87.7392	80.5714	77.1325		4.60333	95.1456	2.73516	2	90.6448	1.73983	6	82.7774	1.42022	7
	4.6674	93.9506	90.5611	89.6648	84.8384	84.8432	85.1972	82.6923	79.3673		98.6566		95.697	90.6229	90.97	87.6683	83.7857	79.0602		4.6674	96.3036	2.35297	2	90.3924	1.41338	6	83.2306	1.18599	7
	4.73118	94.0063	92.4563	89.3057	84.507	86.5418	85.2436	82.833	78.7535		95.4778		97.5051	90.419	90.4619	87.1486	83.2857	76.6506		4.73118	94.742	0.73573	2	90.7759	1.73006	6	82.9224	1.48968	7
	4.79503	93.0414	90.8956	88.8667	85.377	85.7143	86.0325	81.8011	78.2342		97.351		95.9487	92.0951	90.0693	85.5422	81.6667	77.5663		4.79503	95.1962	2.15481	2	90.5421	1.43152	6	82.3653	1.34217	7
	4.85907	94.5259	89.2977	88.9465	85.377	84.0157	85.1044	82.4578	78.5647		95.9508		95.9945	90.7814	85.1732	86.2036	80.4524	79.1807		4.85907	95.2383	0.712455	2	89.2617	1.62837	6	82.2828	1.1251	7
	4.92287	94.3589	90.7098	88.5874	84.5899	84.6254	83.8515	85.3659	77.2899		96.0833		95.4452	88.4485	88.06	86.6997	82.3095	78.7952		4.92287	95.2211	0.862185	2	89.3068	1.46863	6	82.7053	1.31662	7
	4.98693	92.3362	88.7774	88.7869	84.6727	83.7979	85.5684	82.4578	79.3201		96.2157		96.5209	91.1891	86.351	86.8415	80.6905	78.0241		4.98693	94.276	1.93973	2	89.383	1.69621	6	82.3858	1.22745	7
	6.25427	88.6621	51.505	48.4836	42.9992	39.8955	40.2784	35.9756	35.1275		117.275		25.3147	17.1687	12.6097	8.57548	9.78571	8.79518		6.25427	102.969	14.3066	2	33.0135	6.84986	6	25.4905	5.85639	7
	6.31798	87.2333	50.7246	47.2067	42.2121	39.6341	41.1137	35.788	34.7498		117.162		24.8798	16.8969	12.9099	8.95346	8.11905	7.75904		6.31798	102.198	14.9643	2	32.4717	6.65341	6	25.1596	6.0253	7
	6.38205	89.1446	49.8699	46.6081	42.4606	39.4164	39.1183	35.2251	33.1917		116.973		25.1545	16.7384	13.0023	9.16608	7.85714	7.42169		6.38205	103.059	13.914	2	32.3057	6.53781	6	24.4852	5.83615	7
	6.44585	89.1074	51.0591	46.7678	42.3364	38.284	39.1647	34.7561	32.814		116.802		25.4749	17.1914	12.3788	8.48098	7.7381	7.08434		6.44585	102.955	13.8474	2	32.5347	6.66665	6	24.046	5.81213	7
	6.5099	88.8848	50.3159	46.6879	43.2063	39.2857	39.6288	34.9906	32.814		116.064		24.9485	16.6025	11.8014	8.24474	8.5	6.79518		6.5099	102.475	13.5898	2	32.2604	6.7606	6	24.3227	5.89622	7
	6.57372	89.1631	51.0591	47.0471	43.372	40.9843	39.9072	35.272	33.7583		117.408		24.5823	16.5572	11.8707	8.52823	8.04762	6.40964		6.57372	103.285	14.1223	2	32.4147	6.8718	6	24.701	6.10157	7
	6.63752	88.3466	51.8766	46.7279	42.3364	39.6777	39.768	35.0375	33.4278		117.975		24.5365	17.3046	12.194	8.33924	7.80952	7.3253		6.63752	103.161	14.8144	2	32.496	6.7855	6	24.4836	5.95405	7
	6.70157	90.0724	50.2787	46.4485	42.3778	39.8955	38.9791	34.6623	32.1058		117.843		26.276	16.5798	13.0947	8.15025	6.61905	7.01205		6.70157	103.958	13.8853	2	32.5093	6.52424	6	23.9177	5.97272	7
	6.76537	89.4971	51.9881	46.7678	43.2891	39.6341	39.3503	35.272	34.136		115.289		25.2003	16.761	15.5889	7.93763	6.71429	6.57831		6.76537	102.393	12.8957	2	33.2659	6.5402	6	24.2318	6.11359	7
	6.82943	88.6992	51.3935	46.4086	42.1292	39.4599	38.051	34.4278	32.6251		115.686		25.3834	16.7384	12.3095	7.91401	6.85714	6.77108		6.82943	102.193	13.4933	2	32.3938	6.70771	6	23.7294	5.91313	7
	6.89332	89.0332	50.5017	46.2091	42.5849	37.6742	37.4478	34.6154	33.0028		116.537		25.7496	17.1914	13.9723	7.86676	6.57143	6.24096		6.89332	102.785	13.7521	2	32.7015	6.42043	6	23.3456	5.85131	7
RAW DATA
		Concentration (uM)									Concentration (uM)
		Mn									Mn
		0	50	50	50	400	400	400	400		0		50	50	50	400	400	400
		5053	4907	4793	4918	4736	4939	4976	5007		6646		6566	6671	6641	6590	6513	6625
		4938	4879	4727	4841	4676	4498	4790	4828		6479		6255	6315	6967	5875	6433	6156
		4834	4741	4634	4467	4504	4377	4691	4663		6393		6290	6370	6504	5934	5992	6204
		4750	4637	4299	4398	4512	4356	4602	4670		6338		6110	6331	6502	5917	5870	6098
		4655	4535	4266	4405	4519	4430	4497	4621		6238		6195	6226	6464	5832	5907	6062
		4681	4575	4239	4479	4436	4367	4495	4660		6225		6036	6124	6368	5800	5840	6117
		4645	4471	4284	4276	4458	4397	4582	4635		6219		5998	6027	6245	5655	5676	6127
		4614	4461	4261	4254	4441	4307	4468	4488		6081		5932	5997	6430	5948	5818	5918
		4574	4478	4311	4324	4317	4304	4357	4476		6169		5949	6006	6196	5747	5818	6143
		4565	4424	4294	4326	4284	4406	4366	4491		5906		5832	5830	6021	5789	5744	6009
		4443	4400	4201	4340	4261	4332	4269	4489		6030		5714	5753	5935	5723	5688	6107
		4449	4385	4189	4193	4216	4262	4320	4403		6037		5769	5786	5764	5551	5679	6075
		4382	4307	4122	4159	4236	4213	4400	4367		6082		5679	5815	5866	5702	5596	6074
		4354	4305	4183	4218	4167	4214	4342	4357		5963		5759	5686	5596	5598	5665	6046
		4344	4354	4114	4217	4234	4253	4259	4432		5749		5660	5769	5688	5561	5886	5825
		4220	4333	4114	4239	4128	4065	4215	4362		5892		5705	5714	5646	5683	5622	5834
		4343	4232	4079	4225	4131	4258	4152	4267		5957		5601	5609	5700	5591	5654	5633
		4294	4253	4180	4214	4215	4197	4231	4365		5942		5629	5797	5521	5600	5671	5854
		4328	4263	4161	4236	4160	4256	4225	4373		5894		5984	5538	5752	5573	5602	6188
		4246	4240	4074	4186	4164	4173	4307	4432		5870		5722	5603	5670	5496	5542	5868
		4282	4198	4159	4209	4186	4166	4206	4337		5707		5631	5543	5772	5440	5769	5661
		4230	4142	4054	4224	4108	4150	4230	4379		5757		5503	5607	5676	5348	5545	5735
		4227	4183	4137	4260	4235	4134	4154	4348		5694		5515	5586	5656	5386	5546	5596
		4279	4227	4086	4061	4066	4218	4289	4315		5591		5317	5407	5730	5408	5511	5605
		4253	4203	4152	4165	4192	4148	4224	4350		5693		5481	5448	5654	5407	5440	5499
		4158	4165	4091	4100	4096	4167	4161	4258		5580		5329	5462	5475	5370	5622	5588
		4205	4195	4107	4193	4143	4101	4204	4248		5557		5289	5565	5537	5453	5521	5722
		4170	4261	4065	4137	4111	4120	4195	4337		5435		5349	5475	5504	5456	5314	5445
		4216	4228	4077	4110	4065	4193	4248	4328		5614		5485	5388	5367	5352	5380	5512
		4159	4136	3978	4064	4054	4096	4177	4184		5557		5322	5356	5333	5187	5444	5642
		4150	4115	3995	4099	4072	4146	4100	4219		5516		5286	5269	5370	5234	5248	5444
		4197	4118	4103	4094	4065	4073	4249	4110		5657		5289	5222	5381	5366	5278	5430
		4144	4149	3928	4138	4096	4085	4092	4069		5428		5353	5301	5441	5312	5302	5351
		4175	4139	4078	4129	4062	4121	4130	4222		5543		5157	5312	5384	5253	5383	5493
		4179	4117	3963	4190	4020	4074	4147	4213		5412		5255	5367	5405	5240	5272	5565
		4152	4197	4014	4001	4059	4040	4141	4150		5530		5206	5267	5719	5196	5406	5533
		4097	4134	4018	4043	4056	3928	4154	4161		5506		5178	5209	5568	5263	5265	5524
		4180	4024	3987	4086	4159	4060	4154	4172		5556		5204	5140	5260	5227	5225	5627
		4164	4121	3980	4018	4000	4036	4050	4122		5377		5187	5178	5279	5249	5179	5562
		4065	4095	3965	4032	3973	4000	4143	4087		5332		5095	5328	5358	5274	5254	5557
		4082	4121	4051	4058	4007	4041	4080	4146		5493		5147	5180	5355	5179	5246	5609
		4151	4057	3946	3973	4050	3946	4078	4131		5378		5157	5161	5566	5271	5165	5716
		4080	4051	3924	4059	4058	4034	4081	4136		5374		5284	5188	5349	5074	5240	5866
		4091	4111	3992	3999	4098	3964	4113	4050		5456		5219	5138	5226	5230	5182	5694
		4142	4060	3951	4095	3948	4004	4104	4164		5450		5163	5090	5221	5182	5242	5481
		3998	4043	3930	4022	3867	4026	4077	4051		5481		5109	5198	5347	5061	5225	5392
		4058	4095	3872	3983	4039	3920	4021	4134		5355		5176	5016	5317	5146	5238	5429
		4084	4112	3897	4061	4000	4034	4000	4149		5399		5096	5057	5400	5084	5139	5570
		4017	4070	3996	3986	3953	4002	4075	4155		5328		5219	5235	5047	5119	5186	5646
		5410	5523	5517	5485	5373	5467	5297	5687		5186		4859	5149	5426	5399	5396	5583
		5491	5493	5330	5395	5301	5401	5407	5642		5297		4936	5103	5157	5163	5405	5640
		5426	5393	5394	5295	5253	5433	5263	5635		5250		4852	5065	5398	5201	5355	5754
		5396	5303	5278	5150	5189	5462	5367	5680		5187		4977	5101	5119	5248	5235	5302
		5250	5223	5253	5345	5265	5302	5309	5580		5224		4959	5108	5395	5213	5266	5241
		5313	5256	5288	5331	5328	5212	5281	5409		5270		4842	5138	5206	5265	5343	5508
		5288	5349	5276	5196	5219	5477	5328	5553		5336		4834	5081	5169	5200	5149	5196
		5225	5314	5272	5254	5229	5203	5251	5534		5220		4880	5122	5586	5277	5313	5227
		5370	5268	5269	5310	5149	5315	5311	5508		5213		4907	5001	5156	5202	5118	5200
		5142	5372	5225	5329	5266	5228	5278	5444		5171		4920	5044	5144	5091	5094	5369
		5303	5269	5360	5198	5207	5260	5339	5520		5286		4896	5056	5101	5081	5369	5042
		5322	5240	5286	5260	5218	5281	5247	5449		5210		4889	5067	5089	5032	5123	5189
		5340	5360	5171	5368	5111	5313	5211	5534		5272		4841	5053	4977	5094	5191	5147
		5373	5334	5279	5259	5217	5279	5281	5391		5343		4859	5080	5110	5140	5089	5074
		5268	5315	5141	5180	5296	5201	5058	5420		5141		4921	5082	5099	5142	5027	5066
		5246	5285	5151	5187	5082	5107	5142	5529		5247		4792	4949	5129	4964	5308	5075
		5226	5173	5094	5187	5201	5097	5147	5437		5254		4846	4969	5036	4995	5236	5002
		5335	5185	5255	5157	5111	5260	5201	5447		5209		4987	5097	5040	5019	5033	5135
		5127	5253	5053	5277	5128	5159	5217	5397		5246		5133	4926	5186	5090	5090	5208
		5226	5263	5254	5244	5147	5082	5168	5309		5227		5013	5069	5057	5020	5197	5202
		5316	2684	2586	2472	2279	2184	2163	2152		5378		4519	4569	4460	4310	4311	4162
		5389	2691	2506	2414	2296	2155	2132	2118		5285		4369	4415	4330	4233	4200	4150
		5324	2670	2485	2360	2246	2124	2120	2082		5390		4381	4371	4302	4296	4142	4049
		5350	2595	2483	2348	2242	2141	2138	2078		5275		4326	4503	4257	4193	4231	4197
		5277	2608	2481	2415	2229	2136	2120	2079		5301		4362	4357	4311	4228	4147	3906
		5255	2604	2434	2320	2237	2112	2101	2043		5286		4422	4445	4422	4183	4073	3826
		5353	2657	2480	2315	2208	2126	2102	2056		5313		4505	4463	4374	4134	4116	3880
		5298	2627	2448	2299	2191	2115	2091	2079		5228		4332	4412	4292	4186	4057	4056
		5302	2598	2453	2299	2181	2070	2064	2044		5347		4397	4369	4241	4078	4025	3824
		5305	2581	2417	2310	2207	2051	2040	2032		5287		4520	4359	4202	4144	4028	3829
		5170	2610	2418	2316	2171	2062	2043	2030		5282		4317	4295	4174	4086	3977	3797
		5225	2562	2434	2288	2170	2085	2032	1992		5200		4361	4308	4070	3963	3919	3807
		5218	2615	2333	2281	2138	2033	1971	1975		5341		4298	4227	4356	4099	3915	3781
		5179	2585	2413	2254	2185	2078	1991	1924		5220		4359	4233	4189	4017	3776	3790
		5256	2543	2385	2258	2151	2008	1966	1927		5308		4318	4307	4224	4086	3852	3664
		5197	2561	2397	2196	2118	2036	2039	1945		5235		4610	4141	4187	3868	3788	3889
		5203	2588	2333	2220	2110	2051	1993	1934		5275		4351	4249	4004	4042	3781	3841
		5166	2549	2351	2238	2059	1986	2010	1938		5236		4261	4210	4166	3873	3833	3838
		5201	2496	2331	2265	2148	1966	2002	1906		5286		4243	4299	4128	3940	3900	3909
		5095	2519	2372	2266	2122	1951	1935	1926		5339		4390	4262	4153	3966	3830	3922
		5211	2539	2334	2180	2108	2016	1983	1924		5207		4340	4151	4036	3947	3705	3957
		5177	2544	2292	2238	2125	1986	1977	1918		5147		4349	4175	4128	3914	3805	3940
		5187	2520	2345	2271	2033	1990	1960	1887		5298		4310	4208	4134	3905	3726	3989
		5097	2491	2326	2227	2084	1979	1935	1862		5193		4322	4160	4254	3981	3726	4003
		5198	2500	2326	2219	2112	1992	1896	1824		5251		4288	4230	4050	3942	3744	3944
		5106	2471	2353	2247	2071	1969	1930	1846		5185		4266	4162	4048	3846	3755	4002
		5183	2464	2320	2193	2094	1965	1936	1870		5382		4246	4147	4094	3904	3767	4020
		5160	2464	2325	2206	2060	1934	1882	1839		5261		4298	4234	4113	3931	3738	3976
		5163	2513	2328	2178	2087	1986	1896	1856		5227		4249	4246	4222	3894	3730	3867
		5141	2521	2325	2174	2064	1908	1913	1851		5270		4347	4087	4003	3831	3713	4016
		5130	2520	2371	2197	2047	1952	1913	1804		5215		4276	4115	4005	3947	3631	3866
		5146	2481	2283	2199	2134	1941	1882	1789		5122		4273	4181	4031	3872	3765	3895
		5159	2499	2264	2148	2061	1917	1889	1817		5186		4374	4053	3976	3684	3669	3848
		5054	2451	2286	2191	2027	1925	1916	1786		5227		4285	4115	4092	3877	3650	3766
		5161	2495	2298	2166	2023	1917	1895	1797		5156		4251	4096	4190	3822	3692	3659
		5148	2497	2304	2135	2044	1913	1892	1707		5115		4339	4117	3985	3845	3604	3679
		5115	2443	2280	2186	2029	1888	1920	1752		5334		4174	4062	4043	3832	3661	3647
		5155	2465	2251	2220	2051	1927	1848	1764		5308		4237	4085	4004	3892	3478	3669
		5115	2527	2305	2157	1980	1927	1862	1733		5279		4217	4134	3972	3917	3663	3506
		5191	2514	2291	2195	2023	1904	1875	1692		5172		4258	4086	4146	3880	3673	3540
		5085	2550	2285	2169	2031	1895	1901	1738		5266		4229	4025	4069	3856	3636	3596
		5114	2503	2285	2162	1995	1906	1873	1721		5065		4199	4048	4098	3829	3657	3569
		5148	2524	2298	2135	2061	1914	1862	1786		5241		4150	4112	3932	3830	3603	3612
		5100	2457	2310	2157	2007	1906	1881	1765		5102		4216	3993	3995	3939	3664	3573
		5114	2465	2266	2156	2018	1901	1886	1754		5100		4155	4164	3973	3778	3648	3496
		5075	2432	2279	2159	2055	1903	1893	1734		5172		4181	4102	3898	3748	3609	3653
		5015	2506	2284	2168	1975	1895	1876	1736		5071		4199	4100	4032	3761	3653	3655
		5089	2506	2246	2176	1979	1886	1873	1670		5171		4401	4045	3935	3704	3595	3698
		5068	2476	2247	2146	2025	1931	1867	1773		5135		4098	4033	4096	3689	3612	3657
		5124	2481	2247	2141	1991	1868	1796	1714		5095		4134	3995	3938	3689	3616	3644
		5081	2492	2256	2176	2007	1875	1852	1731		5117		4167	3987	3974	3806	3508	3604
		5073	2481	2261	2129	2021	1916	1827	1727		5153		4192	4052	4003	3699	3541	3624
		5068	2493	2262	2136	1956	1910	1833	1760		5030		4172	4032	3970	3842	3520	3647
		4967	2458	2268	2100	1965	1883	1835	1698		5158		4100	4012	4006	3744	3522	3737
		5116	2469	2278	2124	2018	1867	1820	1698		5044		4132	4034	3953	3760	3474	3656
		5122	2456	2280	2176	1963	1916	1811	1692		5148		4161	4051	4033	3747	3501	3630
		5048	2526	2283	2115	1952	1885	1850	1725		5066		4188	4017	3859	3739	3557	3622
		5083	2430	2210	2146	1997	1852	1818	1699		5126		4152	4038	3897	3739	3538	3613
		5119	2462	2219	2101	1956	1864	1826	1728		5192		4087	3943	3944	3793	3540	3654
		5076	2472	2223	2114	1987	1873	1802	1682		5027		4131	4012	4222	3779	3621	3521
		5109	2529	2270	2039	1972	1878	1830	1735		5092		4131	4000	4183	3800	3544	3623
		5131	2455	2240	2005	1978	1866	1811	1703		5083		4152	3962	4066	3727	3537	3591
		5084	2434	2254	2022	2018	1853	1779	1680		4977		4152	4016	3929	3692	3515	3518
		5104	2441	2251	2050	1997	1889	1798	1681		5040		4096	4136	3893	3664	3498	3515
		5058	2458	2221	2051	1941	1889	1822	1686		5073		4097	4044	3923	3686	3455	3587
		5155	2465	2226	2015	1966	1844	1775	1729		5139		4167	4037	4169	3752	3534	3589
		5070	2423	2286	2056	1960	1847	1774	1730		5113		4120	4010	3884	3761	3547	3561
		5103	2445	2194	2058	1981	1865	1827	1703		5095		4117	4025	4064	3695	3451	3519
		5041	2448	2222	2026	1924	1875	1804	1693		5093		4235	3951	3993	3720	3467	3553
		4995	2484	2206	2030	1982	1853	1783	1657		5110		4145	3968	3968	3750	3505	3462
		5077	2498	2255	2027	1964	1867	1764	1682		5131		4154	4034	3937	3585	3459	3411
		5035	2441	2199	1997	1986	1884	1760	1710		5042		4194	4043	4015	3701	3455	3379
		5126	2428	2236	2060	1939	1829	1774	1647		5106		4242	3967	3972	3648	3453	3411
		4980	2475	2230	2038	1955	1843	1783	1688		5173		4237	4092	3846	3714	3384	3201
		5063	2437	2247	2048	1948	1836	1763	1681		5214		4181	4001	3939	3711	3519	3281
		5066	2488	2238	2040	1987	1837	1766	1668		5046		4260	3992	3917	3689	3498	3181
		5014	2446	2227	2061	1968	1854	1744	1657		5145		4192	4066	3900	3621	3430	3219
		5094	2403	2229	2061	1929	1834	1758	1664		5071		4194	4008	3688	3649	3379	3286
		5085	2441	2220	2042	1943	1807	1820	1637		5078		4170	3905	3813	3670	3457	3270
		4976	2389	2225	2044	1924	1844	1758	1680		5085		4217	4026	3739	3676	3389	3238
		4778	1386	1215	1038	916	868	767	744		6198		1106	758	546	363	411	365
		4701	1365	1183	1019	910	886	763	736		6192		1087	746	559	379	341	322
		4804	1342	1168	1025	905	843	751	703		6182		1099	739	563	388	330	308
		4802	1374	1172	1022	879	844	741	695		6173		1113	759	536	359	325	294
		4790	1354	1170	1043	902	854	746	695		6134		1090	733	511	349	357	282
		4805	1374	1179	1047	941	860	752	715		6205		1074	731	514	361	338	266
		4761	1396	1171	1022	911	857	747	708		6235		1072	764	528	353	328	304
		4854	1353	1164	1023	916	840	739	680		6228		1148	732	567	345	278	291
		4823	1399	1172	1045	910	848	752	723		6093		1101	740	675	336	282	273
		4780	1383	1163	1017	906	820	734	691		6114		1109	739	533	335	288	281
		4798	1359	1158	1028	865	807	738	699		6159		1125	759	605	333	276	259

## Sheet: Fig8C
Elen-Q379A
lipid to protein ratio 50
Manganese transport
NORMALIZED DATA
		Concentration (uM)									Concentration (uM)										Concentration
		Mn									Mn										Mean	SEM	N
	Time (min)	0	50	50	50	400	400	400	400		0		50	50	50	400	400	400		Time (min)	0 μM Mn2+			50 μM Mn 2+			400 μM Mn2+
	-6.18453	94.8201	134.306	138.341	141.317	141.284	141.963	141.27	143.566		110.554		142.071	144.558	140.567	161.624	173.042	172.057		-6.18453	102.687	7.86683	2	140.193	1.43838	6	153.544	5.61211	7
	-6.11715	93.2014	131.213	133.154	134.94	135.621	141.316	137.731	139.649		110.93		141.533	141.608	136.675	163.934	163.801	159.462		-6.11715	102.066	8.86418	2	136.52	1.76109	6	148.788	4.88852	7
	-6.05075	91.6367	128.393	132.974	133.852	135.438	130.906	131.798	133.596		108.766		135.876	137.877	132.26	157.911	164.655	154.214		-6.05075	100.201	8.56456	2	133.539	1.32681	6	144.074	5.40345	7
	-5.98428	90.6295	127.57	131.536	131.026	136.952	132.821	129.404	132.808		105.557		133.29	138.335	128.317	150.755	156.807	151.795		-5.98428	98.0931	7.46355	2	131.679	1.58671	6	141.62	4.20803	7
	-5.91737	91.0252	125.898	129.995	128.538	132.672	130.825	129.17	132.579		106.226		126.359	138.847	128.056	149.94	154.53	152.601		-5.91737	98.6255	7.60036	2	129.615	1.94407	6	140.331	4.30446	7
	-5.85097	87.8417	123.528	127.53	125.791	130.611	128.641	130.289	133.342		105.447		129.667	133.971	125.096	153.487	155.01	150.487		-5.85097	96.6441	8.80238	2	127.597	1.53827	6	140.267	4.55784	7
	-5.78428	86.9065	122.28	128.531	130.949	126.148	126.672	130.159	132.146		105.401		128.84	133.957	127.82	147.449	149.933	149.194		-5.78428	96.1536	9.24712	2	128.73	1.57824	6	137.386	4.13712	7
	-5.71762	85.5036	123.902	124.063	124.495	124.191	128.83	126.802	128.23		105.153		127.96	132.597	123.865	146.332	150.771	149.711		-5.71762	95.3284	9.82475	2	126.147	1.44003	6	136.409	4.49231	7
	-5.65095	86.0612	120.833	121.443	123.924	124.817	127.05	127.973	129.222		102.925		124.98	129.553	123.915	145.26	148.779	148.509		-5.65095	94.4931	8.43192	2	124.108	1.26889	6	135.944	4.14343	7
	-5.5843	85	118.937	124.859	121.203	121.895	125.863	122.639	129.044		102.036		125.965	130.738	121.316	143.841	148.824	147.916		-5.5843	93.5178	8.5178	2	123.836	1.73687	6	134.289	4.56714	7
	-5.51763	84.1547	117.864	123.344	121.98	121.973	123.948	125.319	125.636		101.33		124.337	130.55	121.913	147.177	149.453	147.277		-5.51763	92.7421	8.58741	2	123.331	1.70139	6	134.398	4.82707	7
	-5.45068	82.5	117.74	119.235	118.999	122.025	125.647	123.289	127.34		98.7438		125.19	127.99	119.811	140.263	143.987	148.372		-5.45068	90.6219	8.1219	2	121.494	1.67452	6	132.989	4.11333	7
	-5.38428	82.2662	115.469	119.825	122.758	118.528	122.654	122.404	122.711		98.3404		124.101	126.253	121.49	141.757	142.474	147.414		-5.38428	90.3033	8.03708	2	121.649	1.52727	6	131.135	4.58898	7
	-5.3176	80.9173	115.319	120.134	120.892	116.206	123.975	122.821	122.584		99.2573		122.657	129.485	119.512	139.342	142.13	144.782		-5.3176	90.0873	9.17001	2	121.333	1.90899	6	130.263	4.3248	7
	-5.25088	81.223	112.799	119.029	119.725	118.241	123.409	121.364	122.686		102.118		123.497	128.435	117.336	139.191	142.474	145.923		-5.25088	91.6706	10.4475	2	120.137	2.18498	6	130.47	4.3695	7
	-5.18423	81.5108	113.947	117.078	117.367	120.903	121.548	118.709	123.016		101.293		123.379	125.175	114.227	140.383	141.156	144.235		-5.18423	91.4018	9.89105	2	118.529	1.9205	6	129.993	4.26881	7
	-5.1173	81.277	115.369	119.671	117.833	117.119	122.141	119.386	121.796		97.9736		123.668	125.862	118.443	140.685	141.546	144.189		-5.1173	89.6253	8.3483	2	120.141	1.59549	6	129.552	4.51204	7
	-5.0509	80.3237	113.698	115.023	117.444	117.589	121.683	119.464	123.093		98.7897		122.828	126.913	118.033	137.666	140.947	143.991		-5.0509	89.5567	9.23296	2	118.99	2.03754	6	129.205	4.23102	7
	-4.98423	81.1511	112.226	115.845	116.252	117.276	119.903	121.728	120.041		99.0006		123.431	125.31	114.7	138.602	140.093	145.817		-4.98423	90.0758	8.92474	2	117.961	2.12022	6	129.066	4.50239	7
	-4.91758	79.8381	111.727	114.715	118.015	119.259	119.66	119.386	119.786		99.4498		119.467	122.481	114.7	132.775	140.527	145.437		-4.91758	89.644	9.80585	2	116.851	1.58479	6	128.119	4.28533	7
	-4.85065	80.9712	111.776	115.408	116.744	117.667	120.442	119.75	122.813		100.202		119.69	123.99	113.556	135.658	139.838	144.57		-4.85065	90.5865	9.61524	2	116.861	1.80488	6	128.677	4.16616	7
	-4.78423	81.223	111.926	115.973	116.589	117.223	120.82	118.527	121.033		94.7735		118.64	122.872	114.426	133.288	141.081	142.516		-4.78423	87.9983	6.77525	2	116.738	1.53131	6	127.784	4.12726	7
	-4.71757	80.6295	113.847	115.177	114.904	118.528	120.847	121.936	118.082		96.644		121.292	123.087	114.09	134.949	139.464	144.204		-4.71757	88.6368	8.00727	2	117.066	1.64893	6	128.287	4.13384	7
	-4.6509	82.6799	113.548	116.487	118.663	116.649	118.069	119.438	120.193		97.9828		119.113	123.855	114.339	135.9	138.7	143.246		-4.6509	90.3313	7.65145	2	117.667	1.53632	6	127.456	4.27893	7
	-4.58423	80.1619	112.25	117.001	116.9	116.545	120.388	117.512	118.464		94.9844		120.701	121.592	111.765	131.643	137.412	143.931		-4.58423	87.5731	7.41127	2	116.701	1.67557	6	126.556	4.17228	7
	-4.51758	79.7842	113.922	117.232	115.241	117.693	120.496	118.787	116.938		97.781		122.526	124.771	111.64	133.832	138.161	143.505		-4.51758	88.7826	8.99844	2	117.555	2.085	6	127.059	4.20098	7
	-4.4509	79.9101	110.903	113.739	117.03	117.771	120.469	119.516	119.303		97.6252		118.259	120.124	111.454	135.13	137.217	144.189		-4.4509	88.7676	8.85754	2	115.251	1.54452	6	127.657	4.09996	7
	-4.38423	79.1367	109.93	114.099	117.755	116.832	119.202	119.074	120.346		99.239		118.981	122.05	109.924	132.594	137.502	143.596		-4.38423	89.1878	10.0511	2	115.457	2.03451	6	127.021	4.04825	7
	-4.31757	78.8669	112.176	114.843	113.012	115.919	120.604	119.36	118.896		97.4326		120.675	122.791	111.591	134.632	140.078	142.835		-4.31757	88.1498	9.28285	2	115.848	1.93361	6	127.475	4.27117	7
	-4.2509	78.8129	107.26	112.301	116.304	114.431	121.117	115.717	117.192		96.4332		118.351	118.332	112.25	132.02	136.708	138.972		-4.2509	87.6231	8.81011	2	114.133	1.77272	6	125.165	3.94997	7
	-4.18425	76.9604	109.855	113.534	114.075	116.78	117.125	117.356	118.337		98.3312		116.553	120.353	109.675	131.944	134.746	136.553		-4.18425	87.6458	10.6854	2	114.007	1.66313	6	124.692	3.47931	7
	-4.1175	79.6583	112.799	113.123	115.759	114.509	120.2	117.747	120.6		95.0394		118.404	121.269	108.071	132.035	136.139	141.984		-4.1175	87.3488	7.69058	2	114.904	1.89546	6	126.173	3.95643	7
	-4.05065	77.0324	111.652	112.969	112.805	115.449	117.745	116.315	119.405		95.8096		119.139	121.336	107.462	132.714	137.038	140.219		-4.05065	86.421	9.38864	2	114.227	2.08706	6	125.555	4.0369	7
	-3.98423	77.2302	109.556	112.506	114.826	116.597	117.368	117.564	116.887		95.397		117.603	120.164	107.972	129.016	136.708	137.953		-3.98423	86.3136	9.08341	2	113.771	1.91199	6	124.585	3.68307	7
	-3.91732	79.2806	108.757	112.506	114.619	113.57	118.689	115.717	115.132		94.3151		116.08	121.619	107.35	131.809	135.465	139.428		-3.91732	86.7978	7.51724	2	113.489	2.12236	6	124.259	4.12372	7
	-3.85092	77.8777	108.234	109.142	114.515	115.188	117.826	114.832	118.286		94.691		118.115	117.645	107.25	132.745	129.654	139.763		-3.85092	86.2844	8.40665	2	112.484	1.99249	6	124.042	3.74596	7
	-3.78398	78.0935	108.683	111.813	112.934	115.684	117.26	116.758	118.184		94.8377		116.198	119.033	108.457	131.839	134.791	137.831		-3.78398	86.4656	8.37209	2	112.853	1.70481	6	124.621	3.67537	7
	-3.71758	78.5971	108.159	112.84	112.597	111.221	116.262	113.115	119.583		95.4154		118.614	122.845	106.852	134.556	134.162	142.242		-3.71758	87.0062	8.40912	2	113.651	2.49873	6	124.449	4.64767	7
	-3.65092	78.4892	109.007	111.505	112.623	113.987	117.503	113.765	116.302		93.664		116.422	121.875	104.365	132.699	133.863	141.816		-3.65092	86.0766	7.58742	2	112.633	2.46676	6	124.277	4.35425	7
	-3.58425	78.3633	107.959	112.018	112.234	112.63	116.532	115.951	116.251		94.6451		117.393	117.713	107.86	130.827	134.222	139.717		-3.58425	86.5042	8.14092	2	112.53	1.76601	6	123.733	4.10428	7
	-3.51758	76.5288	107.56	112.25	109.876	114.457	117.476	113.661	116.633		95.177		116.999	122.037	106.641	127.37	135.315	138.576		-3.51758	85.8529	9.32409	2	112.56	2.42796	6	123.356	3.91502	7
	-3.45092	78.6331	108.109	108.243	112.779	112.291	115.156	114.728	117.65		95.0303		114.965	118.979	105.87	130.45	133.039	138.956		-3.45092	86.8317	8.19858	2	111.491	2.02794	6	123.182	4.03527	7
	-3.38425	76.5647	109.032	111.839	114.671	114.979	115.777	113.999	116.734		93.7282		117.157	117.955	107.785	128.246	129.939	135.625		-3.38425	85.1465	8.58173	2	113.073	1.72126	6	122.186	3.33521	7
	-3.31758	77.446	107.211	111.505	112.001	113.909	112.999	111.658	116.328		93.8566		118.614	116.608	107.138	132.76	130.762	139.398		-3.31758	85.6513	8.20528	2	112.18	1.92877	6	122.545	4.30606	7
	-3.25065	75.8993	107.46	107.73	111.249	112.839	116.37	113.271	114.115		93.6732		116.776	116.743	107.126	130.646	132.949	136.69		-3.25065	84.7862	8.88696	2	111.181	1.86587	6	122.411	3.97382	7
	-3.18425	75.6655	108.059	110.349	113.893	113.1	117.044	113.973	115.412		95.9747		119.441	118.979	106.964	130.601	128.815	138.896		-3.18425	85.8201	10.1546	2	112.948	2.20518	6	122.549	3.82774	7
	-3.11732	75.9712	107.136	109.707	111.975	111.848	116.505	114.988	115.081		95.6354		115.266	114.736	108.631	130.465	129.879	135.382		-3.11732	85.8033	9.83211	2	111.242	1.35373	6	122.021	3.59596	7
	-3.05092	76.4748	107.236	109.759	111.949	111.091	116.613	113.999	115.056		93.9483		115.135	117.794	105.298	127.657	131.676	136.781		-3.05092	85.2116	8.73673	2	111.195	1.93351	6	121.839	3.79282	7
	-2.98425	75.8453	106.886	109.091	112.779	114.248	112.837	112.542	114.98		92.1236		116.225	118.723	104.203	126.963	130.343	134.773		-2.98425	83.9845	8.13914	2	111.318	2.28226	6	120.955	3.56079	7
	-2.10903	102.86	142.241	143.4	151.788	150.574	159.088	150.872	157.121		100.523		123.024	126.36	111.727	132.88	134.372	144.433		-2.10903	101.691	1.16855	2	133.09	6.17151	6	147.049	3.90892	7
	-2.04522	101.871	141.966	144.222	149.533	147.677	155.178	149.258	154.323		98.7621		120.123	123.128	111.093	130.374	136.468	142.577		-2.04522	100.316	1.55418	2	131.678	6.35705	6	145.122	3.47879	7
	-1.98115	100.09	139.446	144.581	149.585	147.182	150.944	148.738	158.24		97.4876		121.226	121.35	110.882	129.529	135.465	139.458		-1.98115	98.7888	1.30114	2	131.178	6.30983	6	144.222	3.73562	7
	-1.91735	101.817	141.467	145.455	145.775	146.634	155.367	146.006	154.349		95.4704		122.184	122.522	111.28	129.695	134.177	139.611		-1.91735	98.6434	3.17306	2	131.447	5.98355	6	143.691	3.67419	7
	-1.85355	100.306	140.644	147.072	147.46	150.913	154.585	147.541	153.332		99.0189		118.01	124.852	109.638	131.96	134.656	137.238		-1.85355	99.6623	0.643455	2	131.279	6.54383	6	144.318	3.57488	7
	-1.78948	100.791	141.567	142.476	146.475	145.042	152.589	150.794	147.686		96.6716		119.021	120.03	110.235	132.02	136.468	136.34		-1.78948	98.7315	2.05992	2	129.967	6.24889	6	142.991	3.03312	7
	-1.72568	101.673	142.49	143.785	148.782	148.8	152.508	145.433	153.179		97.6068		115.975	120.043	109.924	129.921	134.207	139.915		-1.72568	99.6398	2.03294	2	130.167	6.82519	6	143.423	3.41635	7
	-1.66188	101.097	141.267	143.349	144.272	144.233	154.072	150.221	151.017		97.075		117.577	120.797	111.205	128.019	133.907	140.964		-1.66188	99.0861	2.01105	2	129.745	6.05724	6	143.205	3.62362	7
	-1.59783	102.212	143.039	141.346	146.397	150.522	158.225	148.061	153.179		96.589		116.028	120.676	109.302	127.642	134.926	135.64		-1.59783	99.4006	2.81159	2	129.465	6.52287	6	144.028	4.26908	7
	-1.53403	100.432	140.394	145.711	149.378	149.243	153.56	146.995	149.593		94.8744		119.559	121.484	108.133	127.687	130.313	136.203		-1.53403	97.653	2.77866	2	130.777	6.79818	6	141.942	3.91492	7
	-1.46997	101.403	142.74	147.612	150.233	146.764	151.483	144.47	150.407		93.6457		114.492	120.501	109.439	128.729	136.978	135.884		-1.46997	97.5243	3.8786	2	130.836	7.37368	6	142.102	3.19259	7
	-1.40615	100	138.872	142.886	144.194	148.225	151.942	150.143	151.424		97.616		115.188	117.336	106.716	124.743	129.579	134.591		-1.40615	98.808	1.192	2	127.532	6.66246	6	141.521	4.35911	7
	-1.34235	101.205	140.744	141.757	146.397	147.025	148.732	146.344	155.417		95.2136		117.642	118.696	108.37	127.189	132.44	137.116		-1.34235	98.2093	2.99568	2	128.934	6.49115	6	142.038	3.79246	7
	-1.27855	99.6583	140.269	141.166	144.012	143.45	151.726	143.508	153.408		94.9294		115.07	118.898	107.114	126.359	134.327	134.515		-1.27855	97.2938	2.36443	2	127.755	6.49667	6	141.042	3.72328	7
	-1.21477	97.482	136.352	140.447	143.909	140.892	152.265	144.444	153.128		95.4429		116.212	119.06	109.601	126.011	130.118	139.884		-1.21477	96.4624	1.01957	2	127.597	5.87146	6	140.964	3.87354	7
	-1.15068	99.7482	138.573	139.831	144.038	142.328	150.944	144.392	148.347		96.8274		115.857	116.783	107.81	125.664	131.99	133.922		-1.15068	98.2878	1.46038	2	127.149	6.28629	6	139.655	3.51843	7
	-1.0869	100.558	136.801	138.778	145.827	142.615	150.297	146.084	150.839		94.581		114.965	118.144	106.666	125.408	132.395	137.861		-1.0869	97.5693	2.98832	2	126.863	6.39239	6	140.785	3.58035	7
	-1.02308	98.6331	136.053	140.627	144.453	144.415	151.888	144.549	148.499		93.9758		115.529	117.874	105.261	126.902	132.649	134.576		-1.02308	96.3044	2.32865	2	126.633	6.47792	6	140.497	3.47448	7
	-0.959033	98.8669	136.427	140.601	142.561	144.076	150.405	143.039	147.126		93.8474		116.789	120.218	104.639	125.196	131.541	136.082		-0.95903	96.3572	2.50975	2	126.873	6.23479	6	139.638	3.41574	7
	-0.895217	98.6871	135.529	141.911	143.675	147.965	149.245	141.348	150.305		93.2973		113.875	115.504	109.116	128.155	131.301	133.602		-0.89522	95.9922	2.69489	2	126.602	6.31522	6	140.274	3.49586	7
	-0.0636	102.302	102.021	105.187	101.97	102.61	102.697	101.431	96.5412		101.724		98.0835	100.997	101.244	102.068	104.044	100.472		-0.0636	102.013	0.2892	2	101.584	0.931653	6	101.409	0.913536	7
	0	100	100	100	100	100	100	100	100		100		100	100	100	100	100	100		0	100	0	2	100	0	6	100	0	7
	0.0638167	101.385	98.0539	100.924	96.9414	99.8434	99.8382	97.1377	96.6429		101.119		98.0572	101.293	99.5523	98.2941	99.8952	97.1555		0.063817	101.252	0.1331	2	99.1371	0.711243	6	98.401	0.548337	7
	0.127867	100.917	101.722	100.154	97.5376	98.5647	97.2222	96.383	93.3622		97.6985		97.9128	96.4978	97.0402	98.2941	98.7419	96.9881		0.127867	99.3079	1.60939	2	98.4774	0.827092	6	97.0795	0.703346	7
	0.191933	98.8129	97.7295	99.9486	97.4857	97.2077	96.9795	96.6432	92.6501		99.459		96.2326	98.3432	96.5925	98.1582	99.341	97.3228		0.191933	99.136	0.32303	2	97.722	0.544483	6	96.9004	0.78603	7
	0.255733	101.079	99.501	99.8459	95.8269	97.3382	99.5146	96.9555	90.9207		98.5421		93.1478	98.8012	97.5127	98.2035	99.0714	95.0867		0.255733	99.8106	1.2685	2	97.4393	1.04753	6	96.7272	1.11566	7
	0.319533	101.799	100.225	99.2296	98.7558	98.7996	98.3549	97.4759	95.6256		99.3673		94.0929	97.1579	98.2465	97.1165	95.8514	96.6535		0.319533	100.583	1.21564	2	97.9512	0.876599	6	97.1254	0.450727	7
	0.383583	98.3273	98.1537	99.3066	96.76	97.1033	98.1931	94.5615	93.591		98.2853		96.2064	96.875	99.5025	97.0713	98.6371	96.1819		0.383583	98.3063	0.020995	2	97.8007	0.570692	6	96.477	0.697637	7
	0.44765	96.5108	99.4261	100.591	96.2416	95.642	98.3819	96.5912	94.7609		98.1111		93.8698	97.6832	97.4133	95.939	94.4586	94.7064		0.44765	97.311	0.80017	2	97.5374	0.967079	6	95.7829	0.5212	7
	0.51145	101.942	99.3513	99.6148	98.0041	93.6587	98.2201	94.0411	90.9715		100.587		93.0822	94.4639	96.1199	95.2748	95.3272	94.3413		0.51145	101.265	0.6778	2	96.7727	1.08965	6	94.5478	0.823772	7
	0.57525	98.9209	99.1517	96.9183	96.2675	94.833	95.4962	92.6099	93.2604		96.8458		92.8721	91.945	95.5976	94.2633	91.7478	92.0444		0.57525	97.8833	1.03754	2	95.4587	1.08748	6	93.465	0.542796	7
	0.6393	99.8921	98.6527	96.8927	95.2048	93.8413	94.0669	92.0895	90.056		98.9272		94.2636	93.6288	95.2245	94.3539	94.0542	92.9875		0.6393	99.4096	0.482445	2	95.6445	0.751598	6	93.0642	0.582649	7
	0.703383	98.8489	98.5778	98.716	97.0192	93.8152	97.8155	92.4798	91.6073		95.6079		93.9748	93.8847	96.6422	94.0217	91.4183	92.7137		0.703383	97.2284	1.6205	2	96.4691	0.87041	6	93.4102	0.823952	7
	0.767183	98.2194	96.3323	97.6374	96.5008	92.6931	93.3927	91.9594	90.412		96.2681		94.0011	89.7899	92.6502	94.9879	91.9425	92.0901		0.767183	97.2438	0.975655	2	94.4853	1.19804	6	92.4968	0.537956	7
	0.83125	97.8237	98.0788	97.9969	93.183	93.9457	91.9633	88.3424	88.2503		96.6532		91.0081	90.9079	94.1923	92.3309	92.4517	90.1278		0.83125	97.2385	0.58526	2	94.2278	1.31044	6	91.0589	0.828715	7
	0.895033	99.6403	96.1577	97.5347	94.7123	91.7537	94.9569	92.74	89.1658		97.4601		94.1323	93.1708	93.4088	92.1347	89.0669	90.1126		0.895033	98.5502	1.09009	2	94.8528	0.691575	6	91.4186	0.804769	7
	0.95885	96.5647	96.2575	97.4576	94.6086	91.4927	93.7702	90.7364	88.708		95.2687		92.0452	92.3491	93.7446	92.5272	90.5047	88.5002		0.95885	95.9167	0.648045	2	94.4104	0.876035	6	90.8913	0.723478	7
	1.02292	97.8597	97.8044	95.095	92.198	90.7098	92.1521	89.5915	87.2838		97.3684		91.1132	91.6083	93.4585	92.195	88.6775	88.8196		1.02292	97.6141	0.245645	2	93.5462	1.0333	6	89.9185	0.700235	7
	1.0867	98.5072	95.9581	96.6359	95.1529	91.8058	91.397	88.5766	88.9369		94.3701		91.0606	92.3626	93.1103	90.8364	91.2086	88.9109		1.0867	96.4386	2.06856	2	94.0467	0.898337	6	90.2389	0.51906	7
	1.15052	97.9137	94.3862	97.1751	93.3904	91.8058	91.9094	89.1231	88.6826		96.4973		92.4915	89.9919	91.2697	91.0477	90.0105	86.0511		1.15052	97.2055	0.708165	2	93.1175	1.02833	6	89.8043	0.784294	7
	1.21457	96.1511	94.6108	97.2779	94.0902	92.3017	92.26	88.7328	87.1821		97.3684		91.4938	90.167	92.4139	90.1721	90.8192	88.6979		1.21457	96.7597	0.60867	2	93.3423	1.03309	6	90.0237	0.729382	7
	1.27837	100.306	95.3343	96.9697	94.3753	91.7276	92.1521	87.4837	87.8688		97.0842		89.8661	90.5172	93.3217	92.814	89.6211	87.2832		1.27837	98.695	1.61082	2	93.3974	1.12902	6	89.8501	0.896758	7
	1.34243	96.277	97.1557	97.4063	95.2048	91.8058	91.0464	88.8108	86.6989		96.8733		91.6382	92.1067	96.1821	92.3611	90.0854	84.5452		1.34243	96.5751	0.29815	2	94.949	1.02524	6	89.3362	1.07925	7
	1.40623	98.1115	96.3074	95.9938	96.6822	92.3017	93.123	88.4986	85.7325		93.8199		92.3471	89.4531	93.2471	90.9571	88.3031	85.3362		1.40623	95.9657	2.1458	2	94.0051	1.16142	6	89.1789	1.15824	7
	1.4703	98.3453	94.8852	95.3261	93.1052	89.9791	91.0194	85.7143	86.0631		95.0211		93.2791	91.9989	92.2025	91.2591	88.5278	83.5716		1.4703	96.6832	1.66212	2	93.4662	0.559413	6	88.0192	1.11822	7
	1.53435	97.5899	92.3403	93.3744	94.0124	90.2662	90.3991	89.2792	87.5381		94.2417		91.9795	90.9752	92.0159	90.5042	89.6061	85.5491		1.53435	95.9158	1.67412	2	92.4496	0.443191	6	89.0203	0.695418	7
	1.59815	97.1043	95.7086	96.0966	91.1353	89.8486	91.3161	87.3797	87.5127		90.1889		91.8483	89.3184	90.536	89.538	87.5693	84.4843		1.59815	93.6466	3.45771	2	92.4405	1.14711	6	88.2355	0.838916	7
	1.66222	97.3201	95.3593	96.4304	91.5759	89.3006	88.0259	89.1751	85.351		93.6915		90.9163	92.2953	93.3217	91.8931	86.5059	84.7733		1.66222	95.5058	1.81429	2	93.3165	0.888877	6	87.8607	0.948115	7
	1.72603	94.6403	94.4361	94.453	90.1763	90.9186	90.9655	88.2123	85.5544		96.0205		89.853	90.0593	90.8469	87.9378	87.9287	83.3131		1.72603	95.3304	0.690125	2	91.6374	0.898052	6	87.8329	1.03647	7
	1.79008	95.8273	95.6836	95.9682	88.5692	90.5532	91.1543	88.6547	84.2319		93.985		91.4544	89.8168	91.7299	89.055	87.1349	84.4083		1.79008	94.9061	0.92119	2	92.2037	1.23792	6	87.8846	1.04385	7
	1.8539	97.7158	96.8313	94.9409	93.9865	88.7265	89.8058	88.0042	84.588		94.2692		91.6514	88.8739	93.1725	90.7458	87.2697	83.6477		1.8539	95.9925	1.72331	2	93.2428	1.12456	6	87.5411	0.987681	7
	1.91795	98.1295	95.2096	95.6086	93.7532	90.6315	91.7476	86.3648	84.5117		94.0308		91.3232	89.7495	92.6875	89.4777	86.9402	82.0657		1.91795	96.0802	2.04934	2	93.0553	0.925773	6	87.3913	1.30694	7
	1.98175	98.2014	94.486	96.7386	93.4163	87.4478	88.835	86.573	84.8169		93.5448		90.4043	91.4601	90.7474	88.1039	88.1683	83.4956		1.98175	95.8731	2.3283	2	92.8755	1.00744	6	86.7772	0.740541	7
	2.04555	99.5144	94.8104	93.4258	92.4832	88.7004	89.0237	85.9485	83.9268		92.2336		91.4938	91.5814	90.0759	87.4094	88.4978	82.7502		2.04555	95.874	3.64038	2	92.3117	0.676147	6	86.6081	0.937755	7
	2.10987	97.7158	95.01	93.3487	93.2348	89.1441	88.6462	85.4281	83.7233		95.8738		90.89	88.5506	89.9764	87.5906	87.3596	83.7694		2.10987	96.7948	0.921	2	91.8351	0.991059	6	86.523	0.842855	7
	2.17367	97.8597	95.509	93.5028	92.198	89.7704	86.4347	85.1158	84.8423		92.5821		90.5356	89.507	90.3122	88.8587	87.1799	78.8257		2.17367	95.2209	2.63883	2	91.9274	0.927137	6	85.8611	1.35775	7
	2.23773	98.3633	93.3383	92.1418	92.0943	90.1357	87.055	86.8852	82.5534		93.9391		89.8399	88.4698	93.3715	88.2095	85.2928	82.4156		2.23773	96.1512	2.2121	2	91.5426	0.807756	6	86.0782	1.08086	7
	2.30153	97.9317	94.1118	93.6055	92.8201	88.0741	90.8037	85.5061	84.5117		94.9111		89.8924	90.0593	89.566	89.1908	84.5889	81.3051		2.30153	96.4214	1.51029	2	91.6758	0.840884	6	86.2829	1.2295	7
	2.36533	98.1835	93.513	95.018	90.2799	90.762	88.7001	85.1158	83.5453		93.2698		91.2444	88.8874	92.0284	87.6812	86.2813	82.8871		2.36533	95.7266	2.45684	2	91.8285	0.902579	6	86.4247	1.07024	7
	2.42913	99.3345	95.6836	95.4289	91.5759	90.3184	86.5696	86.573	85.4018		95.2962		88.6716	90.0054	88.9193	88.8285	85.5774	81.4573		2.42913	97.3153	2.01918	2	91.7141	1.28534	6	86.3894	1.06249	7
	2.49295	96.5647	95.5589	93.7596	92.872	89.3006	88.3225	85.4801	84.9949		91.3442		88.5928	88.9143	88.7327	87.9529	86.2513	82.4004		2.49295	93.9545	2.61027	2	91.4051	1.24102	6	86.3861	0.891223	7
	2.557	97.7518	96.2325	92.6297	92.0684	89.2745	86.2729	85.376	83.2401		93.0314		88.2646	89.3992	92.3268	90.7005	85.9518	80.6663		2.557	95.3916	2.36022	2	91.8202	1.13937	6	85.926	1.28462	7
	2.6208	98.705	94.8104	93.6312	93.3385	89.7443	88.1338	84.3612	84.0539		93.9758		90.9294	91.312	90.9961	88.436	88.393	80.8032		2.6208	96.3404	2.36463	2	92.5029	0.669838	6	86.275	1.22653	7
	2.6846	97.4281	94.6357	93.169	92.4572	89.2223	89.2395	83.9188	82.7823		93.6457		88.8553	89.3319	90.2624	86.6395	85.9967	82.6285		2.6846	95.5369	1.89118	2	91.4519	0.944232	6	85.7754	1.05768	7
	2.74867	97.4281	93.0389	91.1402	92.5091	88.857	88.4574	84.3612	81.5615		91.2158		86.125	86.3685	91.4065	86.4432	86.1764	79.784		2.74867	94.322	3.10611	2	90.098	1.25106	6	85.0915	1.288	7
	2.81273	95.6475	94.5359	94.1192	90.9539	87.9697	88.754	85.324	81.8667		91.6926		89.5642	86.4628	90.1754	88.4813	82.8516	77.3654		2.81273	93.6701	1.97741	2	90.9686	1.23228	6	84.659	1.59645	7
	2.8768	97.8237	93.4132	92.3986	92.7424	87.6566	86.7044	83.8668	80.3408		91.5918		89.131	84.9273	91.618	86.2923	84.9184	78.5823		2.8768	94.7078	3.11598	2	90.7051	1.30443	6	84.0516	1.28659	7
	2.9406	97.2662	93.7625	93.2974	90.6947	89.3528	87.4326	83.4504	81.3835		90.0513		88.0152	89.3992	90.6604	87.3037	83.84	79.4037		2.9406	93.6588	3.60742	2	90.9716	0.905248	6	84.5953	1.35549	7
	3.0044	96.1691	93.8872	94.6584	92.0684	86.6127	87.2708	85.0638	83.1384		92.793		91.1788	86.9343	90.1256	88.4662	84.1396	82.2635		3.0044	94.481	1.68805	2	91.4755	1.13772	6	85.2793	0.858079	7
	3.06845	98.1835	94.012	91.7309	91.3945	87.8653	86.9202	83.6586	79.883		91.9127		89.2623	86.7188	90.0137	84.1787	83.5705	77.5175		3.06845	95.0481	3.13537	2	90.522	1.01181	6	83.3705	1.38013	7
	3.13227	96.4928	95.3343	92.5783	91.6537	88.309	85.4639	82.7218	81.8159		93.2056		89.1179	88.0657	91.0956	87.2886	83.6453	80.5598		3.13227	94.8492	1.64362	2	91.3076	1.05354	6	84.2578	1.0848	7
	3.19607	98.2554	94.0619	92.7324	90.9539	86.1169	87.7562	81.9152	80.824		92.0502		89.4067	88.4025	90.3992	86.413	84.1845	78.7496		3.19607	95.1528	3.10257	2	90.9928	0.856834	6	83.7085	1.25216	7
	3.26012	95.9892	93.7126	94.376	90.4355	86.404	85.9493	82.0453	79.4507		94.2417		89.5773	87.5404	92.0905	85.2053	83.0613	78.8105		3.26012	95.1155	0.873755	2	91.2887	1.06075	6	82.9895	1.1569	7
	3.32418	98.5612	93.3134	92.8095	90.7465	86.0125	86.2729	81.9672	79.3998		94.3976		87.8971	87.9849	88.8198	85.4771	84.8435	78.415		3.32418	96.4794	2.08178	2	90.2619	0.981376	6	83.1983	1.23536	7
	3.38798	94.7842	92.1657	93.0919	91.2908	86.7954	87.1899	82.5137	79.9593		89.8221		89.3542	88.6584	90.3246	86.8659	82.5071	79.0386		3.38798	92.3031	2.48102	2	90.8143	0.689459	6	83.5528	1.29269	7
	3.45178	95.9712	91.991	92.527	91.9129	85.2035	85.8684	82.904	79.7304		89.3912		86.0593	88.0523	88.5586	86.5036	83.4057	77.1676		3.45178	92.6812	3.29003	2	89.8502	1.08435	6	82.969	1.29314	7
	3.51585	97.3022	94.0868	91.4484	91.6278	86.3518	85.329	83.0081	79.9084		92.6279		88.6978	86.7592	90.5609	85.0694	85.3377	77.0307		3.51585	94.965	2.33712	2	90.5301	1.03725	6	83.1479	1.30423	7
	3.5799	97.3381	93.7126	92.5526	89.6838	87.0564	87.2168	83.9969	79.9339		91.2067		88.7503	86.1665	89.7276	84.9789	83.3758	75.8899		3.5799	94.2724	3.06573	2	90.0989	1.10562	6	83.2069	1.53485	7
	3.64398	96.9604	95.0349	92.8095	93.52	86.3257	86.3808	82.6698	79.0437		91.1058		88.0677	85.1428	90.3992	84.5109	81.4138	76.4375		3.64398	94.0331	2.92731	2	90.829	1.51653	6	82.3975	1.41063	7
	3.70777	98.2914	91.0429	91.32	90.9798	85.7255	86.0302	81.5769	79.12		93.1597		88.0546	85.6546	88.0363	84.375	82.9265	78.0499		3.70777	95.7255	2.56582	2	89.1814	0.936161	6	82.5434	1.1815	7
	3.77183	97.6439	92.49	92.7838	90.591	87.1086	85.7605	81.2907	79.527		90.4823		87.8577	87.2171	89.4167	83.439	84.5889	74.9468		3.77183	94.0631	3.58079	2	90.0594	0.947833	6	82.3802	1.57637	7
	3.8359	96.7626	92.3902	91.4997	88.8802	84.5511	85.6257	80.9784	79.6033		90.2347		87.7133	88.0388	89.1556	84.4505	82.6269	74.8251		3.8359	93.4987	3.26393	2	89.613	0.776871	6	81.8087	1.41475	7
	3.89997	96.6367	92.7894	91.397	89.5801	84.6816	85.1402	80.5621	78.764		92.8755		86.8076	85.7759	90.9588	82.5634	81.6834	77.6848		3.89997	94.7561	1.88061	2	89.5515	1.12036	6	81.5828	1.06247	7
	3.96403	97.6619	93.6377	91.1402	90.0985	84.7599	85.6257	80.2238	79.3998		90.4365		85.9412	87.8367	89.2551	83.2428	83.6903	76.0268		3.96403	94.0492	3.61271	2	89.6516	1.08816	6	81.8527	1.29659	7
	4.02783	97.0324	92.016	88.9831	89.943	84.2641	86.3538	80.5621	80.0356		89.8588		87.5295	88.0523	90.2251	82.971	82.7318	76.0572		4.02783	93.4456	3.58679	2	89.4582	0.66552	6	81.8537	1.25976	7
	4.09188	97.6439	94.511	93.8367	90.1763	85.3079	86.192	79.7034	78.1027		90.8674		89.3542	84.146	89.4416	85.2808	83.3608	77.1676		4.09188	94.2556	3.38823	2	90.2443	1.52469	6	82.1593	1.42066	7
	4.1557	97.2482	93.6377	93.811	89.6838	83.8727	84.5739	80.2758	78.5351		88.4467		88.2253	83.3244	89.5162	83.8919	82.5221	75.7682		4.1557	92.8475	4.40074	2	89.6997	1.58392	6	81.3485	1.24237	7
	4.21948	95.2338	93.1886	91.2429	87.7657	85.1253	85.5178	82.0973	79.12		91.711		87.1226	84.5097	88.285	84.3901	82.2525	78.415		4.21948	93.4724	1.76141	2	88.6858	1.26102	6	82.4169	1.06746	7
	4.28355	97.5899	91.2425	90.5239	88.958	84.2119	86.4617	81.2126	77.8484		92.1786		87.5952	85.3448	89.7898	84.4354	82.3573	74.6273		4.28355	94.8843	2.70566	2	88.909	0.880546	6	81.5935	1.55773	7
	4.34735	98.5791	91.8663	93.3231	89.8652	85.4123	85.4099	80.2758	78.5351		91.766		89.1704	85.2909	89.6406	82.9106	78.7479	75.6009		4.34735	95.1726	3.40657	2	89.8594	1.11681	6	80.9847	1.40905	7
	4.4114	96.4568	91.0429	91.9363	88.2582	85.3079	83.5491	81.5249	76.3479		90.8491		87.1882	86.5032	87.5886	84.3146	81.3539	75.7378		4.4114	93.653	2.80388	2	88.7529	0.90347	6	81.1623	1.42755	7
	4.47547	97.8957	93.8872	91.4484	88.3878	83.2203	84.7896	80.7702	78.2045		90.8582		86.2694	86.2742	91.1205	84.0731	83.3159	75.0685		4.47547	94.377	3.51872	2	89.5646	1.26128	6	81.3489	1.34781	7
	4.53927	97.9856	90.4691	92.0134	88.4655	84.9687	84.1424	81.3427	77.5178		88.8043		86.1775	85.2101	89.6033	84.058	81.938	76.6657		4.53927	93.395	4.59064	2	88.6565	1.05688	6	81.519	1.24403	7
	4.60333	96.5108	92.9391	91.9363	89.7615	83.977	85.1133	79.313	78.0519		93.3981		88.0415	83.9036	89.3297	85.0845	82.0878	74.5665		4.60333	94.9545	1.55633	2	89.3186	1.30525	6	81.1706	1.51479	7
	4.6674	97.7518	92.1657	91.8593	88.2063	83.9509	85.356	79.235	76.2462		91.2342		85.7837	84.2538	85.5366	83.1069	82.2675	75.7682		4.6674	94.493	3.25881	2	87.9676	1.382	6	80.8472	1.43635	7
	4.73118	98.2374	91.4172	89.8048	88.958	83.7161	85.1402	80.7963	77.5941		92.362		88.2778	85.7355	88.6333	84.7826	82.5071	75.2206		4.73118	95.2997	2.9377	2	88.8044	0.765422	6	81.3939	1.42307	7
	4.79503	96.4209	89.496	90.3955	88.9839	84.8643	83.2524	80.2498	77.0092		91.8118		86.1906	84.0787	90.4614	83.6957	80.9945	76.62		4.79503	94.1164	2.3045	2	88.2677	1.05236	6	80.9551	1.22409	7
	4.85907	95.3957	92.1906	91.0118	88.8025	85.047	84.1424	80.1978	75.178		92.197		88.4484	85.1832	87.4891	81.1745	81.1592	77.2437		4.85907	93.7963	1.59936	2	88.8543	1.02134	6	80.5918	1.32549	7
	4.92287	95.1439	91.6168	89.5994	87.4546	81.3413	83.4142	79.4171	77.9247		92.0044		87.0307	84.2807	89.0934	81.7935	79.0325	74.2166		4.92287	93.5741	1.56974	2	88.1793	1.02813	6	79.5914	1.13949	7
	4.98693	97.518	91.4671	90.7807	86.703	84.0031	84.1424	80.6922	75.0763		91.1608		84.3003	82.8125	87.0787	81.8992	82.3873	74.5056		4.98693	94.3394	3.17858	2	87.1904	1.40177	6	80.3866	1.51465	7
	6.25427	94.7842	24.7006	22.3421	21.0472	21.3466	19.822	18.345	18.7182		113.094		26.2667	17.0932	33.7271	11.9867	18.2717	22.011		6.25427	103.939	9.15476	2	24.1962	2.30353	6	18.643	1.24002	7
	6.31798	93.3094	24.975	21.2635	20.1659	19.7808	18.5275	17.6164	17.6246		112.562		26.1223	17.0663	27.422	10.462	14.5275	17.6301		6.31798	102.936	9.62627	2	22.8358	1.62582	6	16.5956	1.1847	7
	6.38205	91.6906	25.1248	20.7499	20.0104	19.1806	18.069	16.6276	16.9125		112.048		25.5841	16.5275	21.5147	9.90338	12.3708	14.8616		6.38205	101.87	10.1789	2	21.5852	1.38183	6	15.4179	1.24296	7
	6.44585	92.8957	23.977	21.4432	19.8289	18.9196	18.4196	16.0552	16.2258		112.984		25.9386	16.743	17.1247	9.32971	11.6519	12.9754		6.44585	102.94	10.044	2	20.8426	1.50345	6	14.7968	1.35264	7
	6.5099	93.1115	24.5509	21.1608	20.0881	18.3455	17.9072	15.7689	16.1241		112.892		26.188	16.7699	14.936	9.13345	10.6485	11.1044		6.5099	103.002	9.89025	2	20.6156	1.77164	6	14.1474	1.4221	7
	6.57372	93.0935	24.7255	21.7001	20.0881	18.3716	17.7994	15.4307	16.0224		114.286		25.8861	17.1336	13.6799	9.05797	9.64505	10.3894		6.57372	103.69	10.5961	2	20.5356	1.88249	6	13.8166	1.51086	7
	6.63752	91.3129	24.1267	21.1864	19.2846	18.1628	17.26	15.3005	15.7426		110.462		25.7417	16.5679	13.8664	8.72585	8.91119	9.4463		6.63752	100.888	9.57457	2	20.129	1.83681	6	13.3642	1.57589	7
	6.70157	93.2734	24.6257	21.3662	19.803	18.4238	17.1251	14.8842	14.8779		114.561		25.3347	16.6756	13.568	8.40882	8.82133	9.72011		6.70157	103.917	10.6437	2	20.2289	1.86074	6	13.1802	1.56283	7
	6.76537	94.3705	24.3263	20.904	19.0254	17.8758	16.9364	15.1965	14.9034		112.562		25.571	16.7295	13.4933	8.71075	8.07249	8.42714		6.76537	103.466	9.0957	2	20.0083	1.86684	6	12.8746	1.62711	7
	6.82943	93.5252	24.3762	21.1351	18.6884	17.8236	16.8554	14.4939	14.8525		112.122		26.4243	16.8373	13.7669	8.13708	7.80291	8.27502		6.82943	102.823	9.29831	2	20.2047	1.93247	6	12.6058	1.65968	7
	6.89332	92.8777	24.0269	20.7499	19.5438	17.38	15.9655	14.598	14.4964		113.13		25.7942	16.8103	13.7669	8.12198	7.72802	7.65135		6.89332	103.004	10.1264	2	20.1153	1.82121	6	12.2773	1.61328	7
RAW DATA
		Concentration (uM)									Concentration (uM)
		Mn									Mn
		0	50	50	50	400	400	400	400		0		50	50	50	400	400	400
		5272	5383	5387	5452	5414	5264	5429	5645		12057		10823	10732	11303	10706	11554	11311
		5182	5259	5185	5206	5197	5240	5293	5491		12098		10782	10513	10990	10859	10937	10483
		5095	5146	5178	5164	5190	4854	5065	5253		11862		10351	10236	10635	10460	10994	10138
		5039	5113	5122	5055	5248	4925	4973	5222		11512		10154	10270	10318	9986	10470	9979
		5061	5046	5062	4959	5084	4851	4964	5213		11585		9626	10308	10297	9932	10318	10032
		4884	4951	4966	4853	5005	4770	5007	5243		11500		9878	9946	10059	10167	10350	9893
		4832	4901	5005	5052	4834	4697	5002	5196		11495		9815	9945	10278	9767	10011	9808
		4754	4966	4831	4803	4759	4777	4873	5042		11468		9748	9844	9960	9693	10067	9842
		4785	4843	4729	4781	4783	4711	4918	5081		11225		9521	9618	9964	9622	9934	9763
		4726	4767	4862	4676	4671	4667	4713	5074		11128		9596	9706	9755	9528	9937	9724
		4679	4724	4803	4706	4674	4596	4816	4940		11051		9472	9692	9803	9749	9979	9682
		4587	4719	4643	4591	4676	4659	4738	5007		10769		9537	9502	9634	9291	9614	9754
		4574	4628	4666	4736	4542	4548	4704	4825		10725		9454	9373	9769	9390	9513	9691
		4499	4622	4678	4664	4453	4597	4720	4820		10825		9344	9613	9610	9230	9490	9518
		4516	4521	4635	4619	4531	4576	4664	4824		11137		9408	9535	9435	9220	9513	9593
		4532	4567	4559	4528	4633	4507	4562	4837		11047		9399	9293	9185	9299	9425	9482
		4519	4624	4660	4546	4488	4529	4588	4789		10685		9421	9344	9524	9319	9451	9479
		4466	4557	4479	4531	4506	4512	4591	4840		10774		9357	9422	9491	9119	9411	9466
		4512	4498	4511	4485	4494	4446	4678	4720		10797		9403	9303	9223	9181	9354	9586
		4439	4478	4467	4553	4570	4437	4588	4710		10846		9101	9093	9223	8795	9383	9561
		4502	4480	4494	4504	4509	4466	4602	4829		10928		9118	9205	9131	8986	9337	9504
		4516	4486	4516	4498	4492	4480	4555	4759		10336		9038	9122	9201	8829	9420	9369
		4483	4563	4485	4433	4542	4481	4686	4643		10540		9240	9138	9174	8939	9312	9480
		4597	4551	4536	4578	4470	4378	4590	4726		10686		9074	9195	9194	9002	9261	9417
		4457	4499	4556	4510	4466	4464	4516	4658		10359		9195	9027	8987	8720	9175	9462
		4436	4566	4565	4446	4510	4468	4565	4598		10664		9334	9263	8977	8865	9225	9434
		4443	4445	4429	4515	4513	4467	4593	4691		10647		9009	8918	8962	8951	9162	9479
		4400	4406	4443	4543	4477	4420	4576	4732		10823		9064	9061	8839	8783	9181	9440
		4385	4496	4472	4360	4442	4472	4587	4675		10626		9193	9116	8973	8918	9353	9390
		4382	4299	4373	4487	4385	4491	4447	4608		10517		9016	8785	9026	8745	9128	9136
		4279	4403	4421	4401	4475	4343	4510	4653		10724		8879	8935	8819	8740	8997	8977
		4429	4521	4405	4466	4388	4457	4525	4742		10365		9020	9003	8690	8746	9090	9334
		4283	4475	4399	4352	4424	4366	4470	4695		10449		9076	9008	8641	8791	9150	9218
		4294	4391	4381	4430	4468	4352	4518	4596		10404		8959	8921	8682	8546	9128	9069
		4408	4359	4381	4422	4352	4401	4447	4527		10286		8843	9029	8632	8731	9045	9166
		4330	4338	4250	4418	4414	4369	4413	4651		10327		8998	8734	8624	8793	8657	9188
		4342	4356	4354	4357	4433	4348	4487	4647		10343		8852	8837	8721	8733	9000	9061
		4370	4335	4394	4344	4262	4311	4347	4702		10406		9036	9120	8592	8913	8958	9351
		4364	4369	4342	4345	4368	4357	4372	4573		10215		8869	9048	8392	8790	8938	9323
		4357	4327	4362	4330	4316	4321	4456	4571		10322		8943	8739	8673	8666	8962	9185
		4255	4311	4371	4239	4386	4356	4368	4586		10380		8913	9060	8575	8437	9035	9110
		4372	4333	4215	4351	4303	4270	4409	4626		10364		8758	8833	8513	8641	8883	9135
		4257	4370	4355	4424	4406	4293	4381	4590		10222		8925	8757	8667	8495	8676	8916
		4306	4297	4342	4321	4365	4190	4291	4574		10236		9036	8657	8615	8794	8731	9164
		4220	4307	4195	4292	4324	4315	4353	4487		10216		8896	8667	8614	8654	8877	8986
		4207	4331	4297	4394	4334	4340	4380	4538		10467		9099	8833	8601	8651	8601	9131
		4224	4294	4272	4320	4286	4320	4419	4525		10430		8781	8518	8735	8642	8672	8900
		4252	4298	4274	4319	4257	4324	4381	4524		10246		8771	8745	8467	8456	8792	8992
		4217	4284	4248	4351	4378	4184	4325	4521		10047		8854	8814	8379	8410	8703	8860
		5719	5701	5584	5856	5770	5899	5798	6178		10963		9372	9381	8984	8802	8972	9495
		5664	5690	5616	5769	5659	5754	5736	6068		10771		9151	9141	8933	8636	9112	9373
		5565	5589	5630	5771	5640	5597	5716	6222		10632		9235	9009	8916	8580	9045	9168
		5661	5670	5664	5624	5619	5761	5611	6069		10412		9308	9096	8948	8591	8959	9178
		5577	5637	5727	5689	5783	5732	5670	6029		10799		8990	9269	8816	8741	8991	9022
		5604	5674	5548	5651	5558	5658	5795	5807		10543		9067	8911	8864	8745	9112	8963
		5653	5711	5599	5740	5702	5655	5589	6023		10645		8835	8912	8839	8606	8961	9198
		5621	5662	5582	5566	5527	5713	5773	5938		10587		8957	8968	8942	8480	8941	9267
		5683	5733	5504	5648	5768	5867	5690	6023		10534		8839	8959	8789	8455	9009	8917
		5584	5627	5674	5763	5719	5694	5649	5882		10347		9108	9019	8695	8458	8701	8954
		5638	5721	5748	5796	5624	5617	5552	5914		10213		8722	8946	8800	8527	9146	8933
		5560	5566	5564	5563	5680	5634	5770	5954		10646		8775	8711	8581	8263	8652	8848
		5627	5641	5520	5648	5634	5515	5624	6111		10384		8962	8812	8714	8425	8843	9014
		5541	5622	5497	5556	5497	5626	5515	6032		10353		8766	8827	8613	8370	8969	8843
		5420	5465	5469	5552	5399	5646	5551	6021		10409		8853	8839	8813	8347	8688	9196
		5546	5554	5445	5557	5454	5597	5549	5833		10560		8826	8670	8669	8324	8813	8804
		5591	5483	5404	5626	5465	5573	5614	5931		10315		8758	8771	8577	8307	8840	9063
		5484	5453	5476	5573	5534	5632	5555	5839		10249		8801	8751	8464	8406	8857	8847
		5497	5468	5475	5500	5521	5577	5497	5785		10235		8897	8925	8414	8293	8783	8946
		5487	5432	5526	5543	5670	5534	5432	5910		10175		8675	8575	8774	8489	8767	8783
		5688	4089	4096	3934	3932	3808	3898	3796		11094		7472	7498	8141	6761	6947	6605
		5560	4008	3894	3858	3832	3708	3843	3932		10906		7618	7424	8041	6624	6677	6574
		5637	3930	3930	3740	3826	3702	3733	3800		11028		7470	7520	8005	6511	6670	6387
		5611	4077	3900	3763	3777	3605	3704	3671		10655		7459	7164	7803	6511	6593	6376
		5494	3917	3892	3761	3725	3596	3714	3643		10847		7331	7301	7767	6502	6633	6398
		5620	3988	3888	3697	3730	3690	3726	3575		10747		7096	7335	7841	6505	6615	6251
		5660	4017	3864	3810	3786	3647	3746	3760		10837		7168	7213	7900	6433	6400	6354
		5467	3934	3867	3733	3721	3641	3634	3680		10719		7329	7192	8001	6430	6586	6323
		5366	3985	3917	3713	3665	3648	3712	3726		10700		7151	7252	7833	6355	6307	6226
		5668	3982	3879	3781	3589	3642	3614	3577		10970		7091	7013	7729	6311	6365	6202
		5500	3974	3774	3714	3634	3541	3559	3667		10562		7075	6826	7687	6244	6126	6051
		5554	3954	3773	3673	3596	3488	3539	3541		10789		7181	6951	7657	6250	6280	6113
		5496	3951	3844	3743	3595	3627	3554	3602		10427		7159	6970	7771	6228	6104	6095
		5461	3861	3802	3723	3552	3463	3534	3555		10499		7161	6666	7450	6292	6139	6054
		5439	3931	3816	3595	3600	3410	3395	3470		10541		6933	6749	7574	6116	6173	5925
		5540	3854	3798	3654	3516	3521	3564	3506		10629		7171	6917	7511	6103	5947	5924
		5369	3858	3795	3650	3506	3477	3487	3488		10390		7012	6856	7538	6129	6043	5818
		5441	3920	3703	3557	3476	3417	3443	3432		10619		6941	6801	7515	6107	5921	5839
		5477	3846	3763	3671	3518	3389	3404	3497		10292		6937	6857	7487	6017	6090	5845
		5444	3783	3784	3603	3518	3408	3425	3487		10524		7046	6681	7339	6031	6010	5657
		5346	3792	3788	3630	3537	3421	3410	3428		10619		6970	6694	7431	5973	6064	5831
		5577	3821	3776	3641	3515	3417	3362	3455		10588		6846	6720	7504	6148	5984	5738
		5353	3894	3793	3673	3518	3376	3413	3409		10565		6981	6838	7734	6118	6015	5558
		5455	3860	3738	3730	3537	3453	3401	3371		10232		7035	6641	7498	6025	5896	5610
		5468	3803	3712	3592	3448	3375	3294	3384		10363		7106	6830	7414	6045	5911	5494
		5426	3701	3636	3627	3459	3352	3431	3442		10278		7007	6754	7399	5995	5983	5624
		5399	3836	3742	3516	3443	3386	3358	3441		9836		6997	6631	7280	5931	5847	5554
		5411	3822	3755	3533	3422	3264	3427	3356		10218		6926	6852	7504	6087	5776	5573
		5262	3785	3678	3479	3484	3373	3390	3364		10472		6845	6686	7305	5825	5871	5477
		5328	3835	3737	3417	3470	3380	3407	3312		10250		6967	6668	7376	5899	5818	5549
		5433	3881	3697	3626	3400	3330	3382	3326		10281		6982	6598	7492	6011	5827	5499
		5456	3816	3723	3617	3473	3402	3319	3323		10255		6957	6663	7453	5927	5805	5395
		5460	3787	3767	3604	3351	3294	3327	3335		10202		6887	6790	7297	5836	5887	5489
		5533	3800	3638	3568	3399	3301	3303	3300		10059		6970	6799	7243	5790	5909	5440
		5433	3808	3635	3597	3416	3287	3283	3292		10456		6924	6574	7235	5802	5833	5507
		5441	3828	3641	3557	3440	3205	3271	3336		10097		6897	6645	7262	5886	5821	5182
		5469	3741	3588	3553	3454	3228	3339	3246		10245		6844	6568	7508	5843	5695	5418
		5445	3772	3645	3581	3375	3367	3286	3323		10351		6848	6686	7202	5908	5648	5345
		5459	3748	3700	3483	3478	3289	3271	3285		10172		6951	6599	7400	5808	5761	5449
		5523	3835	3716	3533	3461	3210	3327	3358		10393		6755	6682	7150	5884	5714	5355
		5369	3830	3651	3583	3422	3275	3285	3342		9962		6749	6601	7135	5826	5759	5417
		5435	3857	3607	3552	3421	3199	3281	3273		10146		6724	6637	7424	6008	5739	5303
		5488	3800	3646	3601	3439	3268	3242	3305		10249		6927	6779	7317	5858	5902	5312
		5417	3793	3628	3567	3419	3309	3225	3255		10213		6769	6632	7258	5739	5742	5432
		5417	3729	3549	3569	3405	3280	3242	3207		9948		6561	6412	7350	5726	5754	5245
		5318	3789	3665	3509	3371	3291	3279	3219		10000		6823	6419	7251	5861	5532	5086
		5439	3744	3598	3578	3359	3215	3223	3159		9989		6790	6305	7367	5716	5670	5166
		5408	3758	3633	3499	3424	3242	3207	3200		9821		6705	6637	7290	5783	5598	5220
		5347	3763	3686	3552	3319	3236	3269	3269		10120		6946	6454	7247	5860	5618	5408
		5459	3768	3572	3526	3367	3223	3215	3141		10024		6800	6438	7238	5576	5580	5096
		5365	3821	3605	3536	3384	3169	3179	3217		10165		6789	6538	7325	5782	5585	5296
		5463	3770	3611	3509	3300	3254	3148	3178		10039		6811	6563	7269	5724	5621	5177
		5337	3756	3675	3489	3311	3187	3153	3124		10278		6824	6499	7405	5644	5546	5181
		5480	3740	3614	3501	3296	3199	3150	3122		10295		6696	6532	7142	5662	5665	5155
		5270	3694	3625	3522	3326	3233	3171	3144		9796		6807	6582	7263	5754	5509	5196
		5336	3687	3603	3546	3265	3184	3186	3135		9749		6556	6537	7121	5730	5569	5073
		5410	3771	3561	3535	3309	3164	3190	3142		10102		6757	6441	7282	5635	5698	5064
		5412	3756	3604	3460	3336	3234	3228	3143		9947		6761	6397	7215	5629	5567	4989
		5391	3809	3614	3608	3308	3203	3177	3108		9936		6709	6321	7269	5598	5436	5025
		5465	3649	3556	3510	3285	3190	3135	3111		10160		6708	6359	7079	5589	5537	5131
		5429	3707	3613	3495	3338	3180	3124	3127		9868		6693	6475	7190	5527	5648	4927
		5380	3703	3563	3429	3240	3175	3112	3130		9841		6682	6536	7169	5594	5517	4919
		5373	3719	3559	3456	3245	3157	3096	3097		10129		6613	6368	7314	5469	5454	5107
		5430	3753	3549	3476	3248	3175	3083	3122		9863		6547	6521	7177	5514	5588	4998
		5395	3688	3465	3470	3229	3202	3096	3147		9800		6668	6537	7255	5496	5524	5000
		5429	3788	3654	3479	3269	3196	3063	3071		9910		6807	6247	7192	5649	5566	5073
		5407	3753	3653	3460	3214	3136	3085	3088		9646		6721	6186	7198	5557	5510	4981
		5295	3735	3553	3386	3262	3171	3155	3111		10002		6637	6274	7099	5590	5492	5155
		5426	3657	3525	3432	3227	3206	3121	3061		10053		6673	6336	7220	5593	5499	4906
		5481	3682	3634	3467	3273	3167	3085	3088		10008		6793	6332	7208	5492	5258	4970
		5363	3649	3580	3405	3269	3098	3133	3002		9908		6642	6422	7043	5585	5432	4979
		5443	3763	3561	3410	3189	3144	3104	3075		9909		6572	6405	7327	5569	5563	4935
		5448	3626	3583	3413	3256	3120	3126	3048		9685		6565	6326	7205	5568	5471	5040
		5366	3725	3580	3463	3218	3156	3048	3069		10186		6707	6229	7183	5636	5481	4902
		5435	3694	3577	3403	3217	3165	3045	2998		9950		6535	6255	6878	5505	5493	4981
		5462	3664	3497	3432	3208	3157	3105	3051		10073		6725	6365	7127	5616	5509	4945
		5361	3587	3520	3433	3252	3087	3084	3028		10013		6566	6242	7274	5544	5408	5037
		5304	3695	3544	3426	3259	3120	3082	2956		10055		6738	6324	7035	5377	5419	5078
		5290	3672	3489	3374	3117	3093	3052	3064		10034		6630	6257	7164	5418	5277	4879
		5422	3666	3535	3345	3219	3120	3101	2952		9942		6422	6148	7002	5425	5501	4898
		5270	990	870	812	818	735	705	736		12334		2001	1269	2712	794	1220	1447
		5188	1001	828	778	758	687	677	693		12276		1990	1267	2205	693	970	1159
		5098	1007	808	772	735	670	639	665		12220		1949	1227	1730	656	826	977
		5165	961	835	765	725	683	617	638		12322		1976	1243	1377	618	778	853
		5177	984	824	775	703	664	606	634		12312		1995	1245	1201	605	711	730
		5176	991	845	775	704	660	593	630		12464		1972	1272	1100	600	644	683
		5077	967	825	744	696	640	588	619		12047		1961	1230	1115	578	595	621
		5186	987	832	764	706	635	572	585		12494		1930	1238	1091	557	589	639
		5247	975	814	734	685	628	584	586		12276		1948	1242	1085	577	539	554
		5200	977	823	721	683	625	557	584		12228		2013	1250	1107	539	521	544
		5164	963	808	754	666	592	561	570		12338		1965	1248	1107	538	516	503

## Sheet: Fig8D
Elen-T224A
lipid to protein ratio 50
Manganese transport
NORMALIZED DATA
		Concentration (uM)									Concentration (uM)									Concentration (uM)										Concentration (uM)									Concentration (uM)
		Mn									Mn									Mn										Mn									Mn										Time (min)
	Time (min)	0	35	50	125	250	325	500	750		0	35	50	125	250	325	500	750		0	35	50	125	250	325	500	750			0	35	50	125	250	325	500	750		0	35	50	125	250	325	500	750			-6.18453
	-6.18453	94.806	176.229	187.771	205.053	198.577	216.675	223.312	235.662		113.754	254.596	269.186	273.932	283.729	299.883	306.771	306.519		114.951	209.728	218.757	232.05	246.402	256.881	252.314	263.944			116.155	198.884	211.039	236.017	226.887	262.596	257.91	272.192		120.958	129.7	266.524	274.845	298.789	305.764	324.967	333.469			-6.11715
	-6.11715	94.2722	173.829	182.372	194.728	197.11	209.939	226.081	230.044		115.311	252.386	266.089	272.344	286.393	287.843	304.776	310.886		116.254	208.395	218.861	227.223	241.566	254.006	251.096	258.328			114.426	199.107	214.835	235.275	223.967	255.103	255.881	263.659		119.927	121.229	264.973	277.096	303.087	304.449	334.661	326.234			-6.05075
	-6.05075	92.3835	166.514	186.871	195.387	196.309	208.243	222.195	232.633		111.635	253.24	261.102	278.97	284.308	294.857	300.242	308.354		113.089	204	212.278	224.349	238.918	251.437	250	262.285			114.219	194.062	211.638	232.998	226.887	258.997	257.313	266.298		117.748	127.52	263.209	271.975	301.029	302.068	328.22	326.369			-5.98428
	-5.98428	92.5683	169.295	184.622	194.112	192.352	210.221	219.524	226.869		110.575	252.587	262.782	270.591	286.277	290.532	302.177	307.595		112.982	202.519	214.107	225.163	236.903	246.789	247.077	253.414			111.045	190.402	209.241	226.748	219.229	248.142	253.612	260.282		118.023	127.198	260.481	272.482	292.07	302.757	324.9	316.295			-5.91737
	-5.91737	92.2398	169.333	182.127	193.893	191.819	205.888	217.678	225.794		112.284	248.518	259.475	273.823	280.081	289.071	304.897	312.848		111.492	200.938	210.92	219.414	232.47	245.382	244.153	256.86			109.987	192.589	210.689	225.212	225.399	252.389	249.91	262.185		116.143	122.623	256.043	272.651	299.879	299.624	312.085	315.551			-5.85097
	-5.85097	91.9113	166.438	176.442	186.424	190.307	204.192	208.159	223.351		110.943	242.19	263.727	272.289	277.417	288.077	295.768	302.975		112.131	197.481	208.83	219.685	228.267	240	238.855	253.287			113.316	191.473	206.244	226.854	222.534	249.145	249.493	265.623		117.519	123.445	253.85	264.997	294.613	297.494	313.413	314.334			-5.78428
	-5.78428	89.8994	162.59	176.033	187.786	190.084	201.225	211.122	221.788		108.78	243.094	257.743	262.705	276.433	290.181	289.843	309.557		110.748	201.531	210.345	223.265	230.915	246.177	239.464	252.329			112.335	190.982	202.747	225.371	222.314	250.501	248.478	258.564		113.483	123.41	254.171	261.339	283.414	292.982	312.683	307.235			-5.71762
	-5.71762	86.471	159.619	171.534	182.293	186.216	197.551	207.285	216.463		106.769	239.528	251.916	270.044	285.061	286.908	293.168	310		110.136	194.123	210.084	215.564	225.619	246.239	239.769	253.606			111.071	190.179	208.092	221.398	217.135	246.254	248	260.16		113.942	124.732	255.615	259.82	282.688	290.226	312.085	308.249			-5.65095
	-5.65095	86.3478	158.667	167.321	183.304	179.191	198.681	207.625	214.362		106.099	244.249	253.438	261.227	273.191	283.285	293.047	307.722		110.827	194.963	207.68	215.672	229.994	242.997	237.454	258.902			109.91	184.107	204.795	215.413	212.507	245.251	246.687	254.328		112.428	122.731	249.786	259.313	286.441	283.396	311.753	305.341			-5.5843
	-5.5843	86.5325	160.724	164.744	181.722	185.327	196.232	204.371	213.434		106.077	243.646	252.651	263.91	280.023	282.7	298.005	299.051		108.726	198.074	202.821	213.069	230.8	244.587	239.647	251.627			107.432	191.518	205.345	220.71	217.3	241.18	244	257.581		112.13	122.266	249.412	254.305	280.569	277.444	311.421	303.448			-5.51763
	-5.51763	87.7848	160.876	167.689	180.316	178.168	195.478	201.166	209.917		105.32	244.4	255.223	266.265	282.224	289.48	286.82	306.329		108.273	198.222	202.456	213.395	224.237	240	241.778	252.585			108.052	185.982	202.797	222.669	214.766	242.301	240.955	255.31		108.622	123.195	248.93	253.686	278.027	281.516	311.089	305.544			-5.45068
	-5.45068	85.5471	155.39	164.663	178.295	182.437	190.674	204.274	207.963		107.461	242.592	250.656	262.048	278.344	280.012	289.601	305.316		109.231	197.481	204.441	212.256	222.74	238.593	236.663	246.905			107.226	188.348	205.295	216.737	218.292	241.239	243.761	252.302		109.654	121.337	243.262	257.907	279.661	283.145	303.652	302.975			-5.38428
	-5.38428	83.8021	153.714	163.804	178.163	176.39	194.772	195.289	204.152		105.817	243.998	255.381	265.717	279.328	282.992	288.815	302.911		105.693	195.309	207.106	214.751	228.785	239.878	242.753	256.988			105.884	186.786	201.798	219.809	218.127	240.826	240.478	252.179		108.759	120.765	244.706	254.53	274.395	278.885	300.332	300.338			-5.3176
	-5.3176	83.5147	152.305	164.54	178.295	175.145	193.406	196.892	205.129		106.985	244.048	254.646	263.253	278.054	277.148	289.964	303.797		108.247	192.938	204.911	212.798	223.719	242.018	236.541	250.734			108.826	185.982	200.05	221.081	219.394	238.171	242.866	252.916		109.287	119.049	236.898	247.496	273.002	275.752	297.942	300.406			-5.25088
	-5.25088	84.6233	153.295	161.472	175.264	175.233	192.511	198.883	203.762		105.558	238.624	249.186	261.61	269.543	279.603	290.931	296.329		106.518	195.457	198.955	210.629	220.783	235.963	243.91	248.756			107.819	190.893	203.447	216.261	216.033	243.127	241.552	254.696		107.521	121.337	239.572	244.457	269.068	277.444	290.571	299.256			-5.18423
	-5.18423	81.8928	154.019	163.436	176.977	175.811	189.119	194.026	198.974		103.849	240.131	255.853	261.665	274.754	279.719	289.178	300.38		107.156	190.469	201.254	209.653	223.661	237.859	235.688	252.202			106.271	189.018	200.549	217.691	215.207	221.652	241.134	246.041		107.819	120.122	239.465	249.634	270.763	274.624	290.903	293.644			-5.1173
	-5.1173	83.5147	152.8	160.736	172.32	172.655	187.235	194.463	199.218		106.315	240.583	246.142	261.227	276.086	277.674	285.187	297.532		107.396	192.889	203.971	206.779	224.813	235.963	235.993	246.905			108.697	185.536	199.55	216.631	217.245	221.77	240.478	251.995		106.489	118.728	234.973	244.907	264.225	276.566	285.923	295.47			-5.0509
	-5.0509	81.7697	155.162	163.804	175.308	175.545	188.601	194.075	196.385		104.693	238.272	253.176	257.831	271.511	274.635	299.214	297.215		106.704	190.173	204.963	209.328	222.568	237.37	237.211	248.564			106.219	186.741	201.998	212.182	215.702	224.838	240.478	250.767		105.091	118.656	230.909	247.665	266.828	276.253	289.309	292.63			-4.98423
	-4.98423	81.4207	154.781	162.822	175.176	174.922	188.978	191.646	200.098		104.369	240.834	247.244	262.212	270.99	279.603	292.987	294.177		103.458	192.395	200.836	210.575	221.013	237.187	232.095	250.032			105.084	185.714	198.002	213.347	216.253	225.251	237.075	248.803		104.059	122.445	234.652	248.79	258.475	273.496	290.106	293.374			-4.91758
	-4.91758	80.9074	151.886	162.74	176.889	173.588	186.717	194.075	200.147		103.049	241.487	250.394	260.57	273.538	277.615	292.322	292.595		105.693	190.617	202.142	208.677	219.459	234.618	231.364	241.991			107.019	183.348	196.503	208.528	210.413	222.891	237.791	242.112		104.334	120.872	230.749	242.487	261.38	272.682	284.595	287.965			-4.85065
	-4.85065	80.9279	154.133	162.168	172.232	174.833	184.315	193.686	199.756		102.509	241.135	249.764	261.281	264.505	281.064	290.266	293.544		102.527	191.457	200.313	207.321	220.783	238.287	239.464	249.777			107.174	184.598	200.799	210.434	213.444	218.466	238.09	249.048		103.508	121.158	233.422	242.431	265.254	268.421	284.13	285.936			-4.78423
	-4.78423	80.4763	149.905	160	175.132	173.41	184.173	189.267	198.144		102.444	243.295	252.178	261.829	268.732	281.297	286.638	300.759		105.533	192.444	199.06	209.436	221.474	234.434	238.124	244.416			104.929	185.179	196.853	214.566	213.994	221.416	240.478	244.444		102.798	119.621	227.38	237.704	258.535	267.481	282.537	289.588			-4.71757
	-4.71757	80.5789	149.371	158.814	173.682	176.434	189.072	195.095	197.362		102.465	239.98	257.585	262.541	266.937	279.661	292.624	295		104.762	190.765	196.97	207.809	221.589	235.352	234.775	242.565			104.981	182.188	200.949	213.771	212.011	221.062	237.313	245.611		101.513	118.62	232.834	241.474	255.993	265.852	282.271	287.289			-4.6509
	-4.6509	78.2386	153.981	162.004	177.636	173.41	183.373	193.589	196.141		99.4377	231.743	252.336	259.474	269.195	277.908	294.317	297.595		105.613	189.531	198.903	207.646	220.61	230.214	236.906	244.161			104.929	182.723	195.954	214.036	216.584	219.292	239.94	242.419		103.119	120.229	226.417	239.955	259.14	267.481	283.201	283.502			-4.58423
	-4.58423	79.7783	150.667	156.483	174.077	179.191	184.079	193.055	200.147		104.239	236.565	251.706	264.896	266.474	280.245	280.048	301.013		105.267	187.21	198.903	208.026	218.423	229.969	230.207	242.757			106.684	180.402	197.602	214.301	213.333	223.54	235.463	243.155		102.82	121.337	228.663	241.362	254.903	265.664	279.349	284.652			-4.51758
	-4.51758	79.2034	152.381	159.059	170.914	174.833	190.108	189.509	196.971		104.347	240.08	249.659	258.543	269.89	280.947	286.034	293.861		105.028	191.901	198.328	207.646	220.322	235.596	230.633	244.544			105.342	184.33	195.854	207.786	212.452	221.593	238.627	244.26		103.119	118.013	227.273	236.016	256.961	269.173	280.279	284.787			-4.4509
	-4.4509	78.3412	149.41	159.018	171.221	175.367	189.166	188.15	193.503		103.244	233.752	253.911	256.407	260.915	281.473	290.931	297.342		104.07	189.136	199.425	208.568	220.61	237.37	234.044	243.842			104.361	181.964	191.309	211.547	214.876	222.478	233.91	240.27		102.316	119.693	226.257	240.011	258.777	265.977	282.603	284.99			-4.38423
	-4.38423	80.4352	150.4	156.81	165.685	174.211	185.257	188.878	196.043		103.136	239.126	255.328	256.024	263.173	273.115	286.699	295.633		102.926	189.037	201.358	206.453	220.61	231.56	234.105	245.82			104.723	185	198.252	206.78	211.35	220	233.97	244.629		101.903	120.014	229.251	234.328	253.753	261.341	280.08	289.452			-4.31757
	-4.31757	78.7518	149.714	163.231	172.144	174.211	185.163	190.966	197.509		103.244	238.373	244.672	258.16	260.046	279.544	288.271	296.013		103.724	191.802	197.44	207.43	219.574	233.394	231.364	245.82			104.542	180.67	194.555	208.051	212.837	224.012	237.313	245.795		100.161	116.655	229.091	234.947	251.513	265.226	277.49	286.207			-4.2509
	-4.2509	76.8015	151.086	156.564	171.134	173.321	183.655	183.487	193.21		100.93	230.889	252.021	256.353	266.532	273.29	286.457	296.266		103.352	189.284	197.44	205.206	221.128	232.477	229.72	242.31			103.897	185.402	197.303	209.905	213.719	222.891	232.239	237.815		101.284	118.299	225.668	236.128	254.964	263.471	277.158	288.709			-4.18425
	-4.18425	80.4763	149.867	157.955	171.134	171.721	185.257	188.781	189.301		103.612	237.418	240.525	253.286	262.999	273.933	282.164	288.544		102.288	188.099	195.141	207.592	215.486	228.012	231.425	240.906			105.29	185.536	197.203	209.958	208.981	221.18	238.03	239.104		100.94	116.262	225.829	233.821	255.69	264.474	279.482	279.175			-4.1175
	-4.1175	80.4558	148	157.669	170.562	169.809	181.065	185.041	197.655		102.119	240.432	245.092	254.929	259.12	267.037	283.374	293.987		102.235	190.963	199.425	207.863	215.314	231.315	236.602	245.246			103.948	186.964	195.504	210.011	214.325	215.221	239.224	241.621		100.573	119.085	225.241	233.483	254.419	259.962	276.892	283.435			-4.05065
	-4.05065	79.2034	148.724	154.601	169.112	169.275	183.514	187.324	190.767		99.827	237.368	240.892	255.257	259.236	269.784	283.857	291.456		103.565	186.074	199.425	203.959	214.853	231.988	230.633	244.097			105.006	183.661	193.357	206.462	215.041	218.407	232.776	235.543		100.092	118.335	226.417	238.267	252.24	258.208	277.158	285.396			-3.98423
	-3.98423	78.9571	146.743	157.791	169.244	170.743	181.159	183.196	192.672		102.487	232.948	250.551	255.367	261.436	270.018	278.718	299.62		102.713	186.617	198.903	203.308	216.12	234.679	232.278	245.884			102.529	181.696	197.003	210.381	212.948	222.832	234.507	234.929		98.4407	117.906	221.176	234.384	254.54	259.211	271.049	283.029			-3.91732
	-3.91732	77.0068	146.362	152.802	167.355	168.92	179.651	185.818	190.523		101.817	233.852	239.265	256.572	262.478	276.622	282.285	294.81		103.99	187.111	195.193	205.369	211.744	228.869	230.633	242.31			104.31	186.205	194.106	207.203	210.358	223.304	234.03	242.848		98.3031	116.655	219.037	234.89	255.085	259.461	278.552	282.353			-3.85092
	-3.85092	79.1829	144.305	153.456	169.244	171.498	178.097	185.43	189.35		101.752	233.903	243.307	251.26	259.815	273.875	276.239	295.253		102.767	188.049	198.328	206.074	217.156	230.153	231.121	241.672			104.361	189.732	197.952	207.786	210.083	216.224	234.328	237.262		99.679	118.049	223.636	230.951	257.143	260.15	268.127	282.894			-3.78398
	-3.78398	76.8015	150.248	155.542	170.079	165.851	180.264	182.904	192.086		102.855	237.167	241.102	247.809	265.721	271.654	281.741	292.658		102.66	186.667	197.231	202.983	212.205	228.624	226.918	240.779			104.697	183.348	197.353	205.826	210.579	222.655	234.925	234.193		98.7388	116.297	222.834	239.392	252.906	251.003	276.826	282.285			-3.71758
	-3.71758	78.8955	147.429	155.787	169.376	166.118	178.615	184.653	187.25		100.541	234.103	244.934	252.738	266.416	277.966	285.067	288.228		102.208	186.469	194.88	203.416	215.774	228.746	227.771	238.992			100.955	183.17	193.107	207.839	210.523	222.596	234.985	235.421		97.7757	119.299	218.93	234.665	248.002	256.704	268.924	278.499			-3.65092
	-3.65092	79.1008	148.61	153.006	168.937	170.698	174.988	186.207	193.698		100.843	236.414	242.572	254.107	259.467	271.479	278.9	293.671		100.958	189.037	194.932	204.935	211.514	229.052	233.313	244.48			103.148	186.429	195.654	206.25	210.744	221.829	230.746	239.042		97.4547	117.548	223.422	231.795	252.966	256.642	275.631	278.026			-3.58425
	-3.58425	76.3704	145.905	153.824	167.926	168.164	177.155	186.935	186.419		102.79	233.501	244.357	254.6	259.873	263.647	281.923	295.19		104.203	185.926	193.73	201.952	213.817	230.703	230.39	238.481			103.794	184.062	194.006	206.727	206.612	216.283	232.179	239.227		98.9681	119.407	220.374	231.964	250.666	256.579	277.092	278.499			-3.51758
	-3.51758	76.3704	146.248	152.352	169.376	166.874	181.818	186.79	190.865		101.103	237.117	242.257	247.426	258.309	265.693	277.509	286.329		102.926	185.975	195.402	206.725	215.947	233.211	233.496	243.076			102.348	184.643	193.556	208.422	210.579	218.997	230.269	236.832		99.5643	119.8	222.139	234.609	252.785	260.15	272.112	271.738			-3.45092
	-3.45092	76.8631	144	153.006	166.081	163.006	177.39	181.836	187.836		101.276	234.154	241.942	251.862	259.236	264.582	279.383	287.405		101.676	185.778	194.514	203.579	217.501	230.031	229.476	241.672			103.148	182.902	191.658	207.839	212.121	220.472	233.672	236.157		97.042	118.049	224.545	231.514	249.334	259.586	274.037	275.389			-3.38425
	-3.38425	77.479	143.581	154.438	166.96	169.32	180.217	187.567	185.686		98.8538	232.697	242.1	243.428	262.826	263.939	277.388	287.405		101.383	186.716	194.828	203.254	212.723	228.135	228.867	240.715			101.961	181.116	187.912	201.165	210.909	221.475	231.164	238.244		99.5873	116.798	220.749	232.189	246.55	256.955	275.033	274.645			-3.31758
	-3.31758	77.828	147.467	153.947	166.916	166.43	182.431	183.973	189.301		101.925	235.66	243.675	244.907	255.414	265.517	277.207	288.924		101.543	183.753	194.775	204.393	213.356	223.67	233.009	242.374			102.684	180.938	193.756	204.184	209.972	223.776	230.985	236.464		97.1795	115.94	222.086	231.57	251.998	257.206	272.576	276.471			-3.25065
	-3.25065	75.9598	148.419	151.534	165.993	161.272	176.354	182.127	188.373		100.238	232.647	239.843	248.795	256.92	268.381	272.612	284.557		102.235	185.531	196.082	201.681	211.399	226.483	229.659	237.907			102.039	182.723	191.558	207.521	209.366	215.398	231.403	235.421		98.005	118.442	219.198	231.289	251.755	259.085	268.858	275.862			-3.18425
	-3.18425	76.124	146.857	151.616	163.489	166.652	174.093	182.71	187.201		99.5891	230.437	236.22	250.712	260.394	265.576	279.686	290.38		101.304	184.642	194.148	199.458	216.811	228.073	223.691	237.652			102.968	180.536	189.81	203.549	209.862	220.295	231.701	234.438		95.5973	116.369	219.519	232.696	245.823	253.008	275.033	271.805			-3.11732
	-3.11732	77.52	143.543	153.988	165.29	166.83	175.506	182.37	185.882		100.952	230.136	240.315	246.933	257.846	270.251	277.872	290.696		101.091	185.136	193.678	202.061	211.629	226.728	230.572	237.715			103.458	182.054	189.161	204.608	211.405	222.655	230.09	235.421		97.2942	116.655	215.08	225.661	245.944	252.882	271.713	278.229			-3.05092
	-3.05092	75.775	145.105	150.184	165.993	163.806	178.191	180.622	188.422		99.1998	229.684	240.262	250.602	256.63	266.335	272.249	286.899		102.9	184.889	190.752	202.115	214.162	229.602	226.797	236.056			101.265	185.223	192.358	207.468	213.003	220.118	230.328	235.973		96.9732	115.833	221.444	228.644	248.789	252.945	269.057	272.414			-2.98425
	-2.98425	74.9949	145.105	149.939	165.949	165.229	176.26	184.216	185.296		100.173	227.976	238.793	244.414	259.525	267.446	274.365	287.089		102.847	188	191.954	200.759	214.508	229.725	226.37	241.608			100.645	182.411	190.46	200.265	209.642	218.584	222.09	235.789		96.2853	116.798	221.23	229.432	250.666	254.261	268.061	276.673			-2.10903
	-2.10903	97.4543	189.676	202.699	218.849	220.053	241.027	244.536	249.096		95.0476	225.113	241.732	243.154	255.356	269.55	270.798	281.139		90.8752	172.296	176.28	188.232	195.394	214.312	210.11	217.358			93.1613	160.536	177.572	189.513	202.424	208.791	210.687	222.529		92.5017	132.273	210.535	226.111	236.804	250	267.795	279.243			-2.04522
	-2.04522	101.006	193.867	198.405	218.146	219.031	235.61	242.448	244.7		95.199	225.665	240	245.728	253.387	263.647	267.533	275.949		91.6467	167.605	178.527	185.575	193.84	208.318	211.998	216.784			90.8903	161.027	173.526	188.294	198.733	211.032	207.642	217.864		93.7858	128.306	210.053	222.679	230.932	250.251	267.331	275.321			-1.98115
	-1.98115	100.513	190.59	201.309	213.533	217.297	235.422	242.885	244.358		95.026	221.999	241.522	244.743	245.165	262.127	269.468	277.278		89.9973	168.148	174.451	187.907	193.84	211.07	210.78	215.571			90.6065	160.179	175.325	188.347	202.314	205.841	208.418	215.347		94.4508	125.768	205.134	225.267	235.472	246.805	259.495	273.428			-1.91735
	-1.91735	97.1258	192.61	199.468	219.464	225.3	240.32	241.476	244.944		94.6151	220.944	237.218	243.702	252.171	261.777	267.775	276.962		91.0881	171.309	176.228	184.49	192.228	207.89	206.456	215.763			91.8194	158.438	173.676	188.347	194.27	208.201	211.582	215.285		93.74	130.021	205.722	215.982	234.262	247.995	263.878	270.588			-1.85355
	-1.85355	98.4192	191.581	200.573	217.75	217.875	236.458	243.371	247.533		93.6851	219.036	238.478	239.102	244.818	259.556	262.636	279.494		91.3009	169.975	174.869	183.677	188.486	208.869	208.465	210.849			90.9935	159.196	170.13	188.718	196.915	206.136	206.866	215.101		92.8457	126.09	207.701	219.246	234.019	248.246	264.807	275.051			-1.78948
	-1.78948	100.328	190.4	204.908	219.025	219.031	234.903	241.525	243.869		92.2362	223.606	238.95	239.704	242.907	258.387	261.608	268.228		90.556	168.198	173.877	178.959	189.234	200.306	210.962	214.167			90.3742	155.759	174.176	186.547	195.758	206.313	214.567	215.408		92.3871	127.663	206.791	217.952	236.077	245.113	257.039	268.492			-1.72568
	-1.72568	100.123	190.21	197.26	216.916	221.787	233.443	242.496	246.116		94.8313	219.287	232.703	237.733	243.544	257.16	268.077	274.367		92.365	165.185	175.131	181.182	190.558	205.443	208.77	217.103			89.9613	161.161	173.277	185.593	198.623	201.534	206.507	213.198		90.8966	125.554	204.866	220.709	229.056	244.737	261.288	274.442			-1.66188
	-1.66188	98.5013	189.676	194.601	214.895	218.497	236.175	234.774	244.016		93.2526	221.045	234.383	238.992	245.744	255.172	260.762	275.38		90.3166	165.877	172.832	181.399	189.292	205.321	207.369	213.72			90.5548	161.875	175.574	186.6	192.837	204.307	212.299	211.786		92.4788	126.876	205.775	217.333	234.322	246.867	260.359	273.969			-1.59783
	-1.59783	96.4689	190.438	202.454	219.64	220.898	229.722	239.048	246.409		93.058	217.73	235.748	235.433	250.029	254.822	263.543	278.544		90.29	167.654	175.183	181.887	189.637	207.034	208.465	209.955			89.6258	160.491	171.828	180.138	193.939	204.13	206.687	214.426		92.0431	123.91	202.888	220.203	232.869	242.043	258.234	266.599			-1.53403
	-1.53403	95.9762	187.81	195.706	215.158	219.12	233.679	235.163	246.8		93.577	217.579	231.024	237.185	249.334	260.549	261.729	276.013		88.614	165.284	172.309	181.508	190.558	202.752	203.228	215.38			89.8323	157.188	171.379	188.189	196.97	203.894	209.194	213.812		91.6533	127.77	205.027	216.882	230.751	243.421	257.835	267.478			-1.46997
	-1.46997	100.719	190.019	194.888	218.409	214.451	237.164	236.96	247.924		92.7552	217.177	235.486	240.197	242.965	251.666	264.389	277.468		88.348	167.16	170.637	183.134	191.767	204.648	203.045	212.444			88.4129	157.054	171.578	186.017	194.435	204.307	210.866	211.541		91.7909	126.162	201.765	217.051	231.538	240.226	261.222	271.805			-1.40615
	-1.40615	97.7417	190.552	193.415	213.181	220.631	225.436	237.834	248.266		93.5121	222.15	232.441	238.116	250.434	256.575	265.175	272.532		89.8643	165.778	174.138	178.688	191.595	206.422	210.719	208.424			91.0968	158.839	172.727	187.818	195.702	205.841	209.313	211.418		91.5845	124.339	204.92	222.847	234.685	245.677	260.093	266.667			-1.34235
	-1.34235	95.7298	184.99	199.427	214.807	212.272	232.077	236.571	244.944		93.4689	220.09	235.486	237.842	241.98	262.77	260.157	270.949		88.9332	161.975	174.713	180.315	192.055	204.281	206.516	212.253			90.1161	160.312	171.429	183.051	189.366	203.363	208.537	209.024		90.1399	124.911	204.278	219.752	235.472	244.549	258.035	270.183			-1.27855
	-1.27855	96.8179	192.229	194.151	213.269	220.053	230.382	235.163	235.418		93.2526	217.529	232.598	239.266	245.281	255.64	262.213	278.101		87.6563	164.543	175.549	183.948	190.558	205.015	211.023	205.935			88.7226	159.286	174.476	184.64	193.774	204.543	204.597	208.963		89.8876	124.803	202.727	216.657	234.019	244.862	259.827	268.695			-1.21477
	-1.21477	99.6921	188	197.342	213.884	210.849	230.24	231.326	240.303		94.269	219.538	232.651	238.061	250.608	259.147	267.17	270.127		89.7579	170.222	170.376	184.924	192.861	206.239	205.847	212.572			89.729	157.5	173.227	179.237	192.672	201.534	206.507	217.004		91.5157	125.518	204.492	221.328	232.688	244.236	255.644	267.072			-1.15068
	-1.15068	99.8974	185.219	197.996	213.84	212.85	228.968	238.028	239.521		91.7388	213.762	234.121	237.295	247.771	253.068	256.892	272.848		89.4919	165.136	172.257	178.362	193.725	207.706	205.481	211.423			89.3161	158.438	166.883	184.693	193.994	205.605	207.701	213.628		91.6074	122.48	207.861	219.696	233.354	247.243	253.851	268.695			-1.0869
	-1.0869	98.3576	187.39	197.219	213.445	212.583	228.168	234.92	241.866		90.7656	220.191	236.325	236.309	245.918	253.477	256.167	277.278		89.013	165.037	171.16	183.026	186.01	200.367	205.968	209.381			89.2387	155.625	175.475	182.733	192.287	200.177	208.239	217.25		91.5616	124.946	206.096	221.666	231.961	240.664	257.437	265.585			-1.02308
	-1.02308	95.5451	188.038	195.337	211.028	215.296	230.57	236.96	245.286		90.4196	223.506	221.26	237.568	242.559	254.296	255.804	269.367		87.8691	166.765	169.749	179.989	189.004	203.547	207.004	210.466			89.1097	159.018	172.178	181.621	190.964	197.876	206.866	218.355		90.8278	124.768	203.048	217.333	228.692	242.92	255.179	269.844			-0.95903
	-0.959033	97.2696	174.514	197.055	212.39	210.627	224.635	237.105	247.582		92.7552	219.287	237.008	234.556	244.007	251.899	259.976	272.405		88.8534	165.926	171.16	178.308	187.91	199.633	206.029	208.488			88.929	157.679	169.431	178.708	193.113	199.646	208.836	210.681		92.5934	123.624	206.417	221.441	231.356	245.113	254.05	267.208			-0.89522
	-0.895217	95.0318	176.8	197.219	214.807	214.54	230.57	235.503	243.723		90.2465	223.807	232.178	236.09	245.86	257.16	261.608	275.886		88.9864	164.049	171.996	176.681	189.234	202.936	204.994	210.976			88.7484	163.304	170.38	181.144	188.926	202.065	203.701	210.313		91.2864	124.553	205.508	214.8	227.724	242.732	258.831	268.898			-0.0636
	-0.0636	98.5629	99.0857	102.045	101.977	101.867	101.884	102.574	101.368		99.7837	102.26	101.26	99.9452	102.664	99.474	103.204	106.266		99.0955	102.123	100.94	100.922	100.345	105.443	102.558	100.893			99.7677	99.5536	100.999	103.867	100.661	103.186	102.627	103.008		97.4318	100.286	99.9465	100.844	101.453	102.193	103.453	102.84			0
	0	100	100	100	100	100	100	100	100		100	100	100	100	100	100	100	100		100	100	100	100	100	100	100	100			100	100	100	100	100	100	100	100		100	100	100	100	100	100	100	100			0.063817
	0.0638167	100.842	97.8667	97.7914	99.0334	96.265	98.2101	99.1744	96.5804		104.585	96.9362	98.5827	98.3023	98.3208	95.9673	96.6747	98.1646		101.144	99.4074	97.4399	97.18	98.9062	99.7554	100.731	96.9368			99.6387	96.2946	98.8511	98.411	97.135	100.649	98.5672	97.299		98.8535	99.178	99.5187	96.1171	97.0944	98.6842	100.266	98.1068			0.127867
	0.127867	101.314	96.8381	97.1779	99.3849	99.0218	99.1521	98.7858	96.4338		100.865	96.1326	95.5906	97.6999	95.4256	96.1426	99.5768	95.8228		100.08	99.2099	97.8056	95.5531	96.4306	98.4709	95.5542	94.3204			99.8968	94.7321	97.5524	97.2458	97.135	98.0531	96.0597	93.4929		98.4866	98.5347	96.4706	97.2425	97.0944	97.619	96.6799	94.7938			0.191933
	0.191933	95.4424	98.5143	98.2004	98.2865	94.6643	96.2789	94.5605	95.1637		100.887	97.5389	99.3176	97.6999	94.4412	92.9281	94.2563	92.2785		98.9625	99.2099	95.5068	95.0651	93.8975	95.474	95.8587	93.044			101.781	95.1786	98.7512	97.5106	95.8678	97.9351	96.2985	91.283		97.7987	97.8199	96.0428	96.5672	93.2809	96.9925	94.7543	95.9432			0.255733
	0.255733	97.8649	94.8571	97.955	97.4077	95.6425	94.4889	95.4347	92.3791		99.4377	97.9407	97.6903	96.4403	93.1673	89.1292	90.4474	90.1899		100.665	97.3333	95.8725	93.8178	94.5308	96.1468	94.0317	94.3842			99.4065	93.3482	98.2018	96.1335	94.6006	93.1563	93.6716	89.5641		96.9732	95.2823	96.3102	95.6106	93.523	94.0476	94.3559	93.1034			0.319533
	0.319533	100.575	101.067	97.5051	98.6819	94.7088	93.8295	91.8893	91.4021		100.433	97.4887	94.1732	95.2355	91.7197	88.9538	88.9964	86.7722		100.825	98.0247	97.1264	92.0824	92.228	96.5749	93.1181	90.4276			99.0452	94.2411	97.6523	96.875	95.3719	93.3923	93.4925	89.6255		99.2204	94.8177	95.9893	94.6539	92.3123	92.0426	92.8287	90.1285			0.383583
	0.383583	98.0497	96.381	94.8875	98.0228	91.8631	93.2171	92.9577	88.6663		98.2483	96.1326	95.5906	92.6616	88.7087	89.8305	87.1221	85.8228		99.1753	96.6914	95.3501	94.4685	92.4583	94.7401	89.9513	89.4065			98.4	93.6161	95.8541	94.0148	94.4353	91.2094	92.7761	89.5641		97.042	93.8885	94.9733	92.3467	91.8886	93.1704	90.3054	89.6552			0.44765
	0.44765	99.4457	95.1619	93.7423	96.7926	92.2188	91.4272	89.2666	87.0542		98.4862	95.0276	93.1759	91.9496	88.535	86.7914	84.0387	82.7848		100.931	96.4938	95.6635	93.7636	92.1128	91.9266	91.8392	89.0874			99.3806	92.7232	97.8022	94.8623	92.7273	91.3864	90.8657	86.4948		97.4318	95.3181	95.1337	92.5718	91.6465	91.4787	90.3718	88.8438			0.51145
	0.51145	94.9908	96.9905	93.7832	95.7381	90.1734	90.5323	86.8868	85.2956		97.9671	94.5756	94.4357	90.1424	86.6821	85.5056	85.9734	83.6076		101.862	96.4938	95.0888	91.7028	91.5371	92.6606	91.1084	88.0026			99.1742	93.9286	96.1538	92.5318	89.0909	88.9676	91.1642	85.2056		95.2992	92.173	94.0107	94.7665	90.678	89.7243	91.1687	87.8972			0.57525
	0.57525	92.9789	95.8095	93.8241	94.6837	89.462	88.8366	88.7324	82.3156		102.076	96.233	93.0709	91.7853	86.6242	84.9211	84.0992	78.8608		99.9734	96.8889	93.6782	92.679	89.1767	90.8257	91.1693	87.1091			99.0968	90.625	94.4056	90.2013	90.7989	90.3245	88.8955	83.8551		95.7349	92.8878	93.0481	92.009	91.2228	88.9098	88.7782	86.3421			0.6393
	0.6393	96.5921	95.7333	91.6155	93.1459	84.5265	86.2459	86.9354	81.8271		99.8702	95.4294	92.9134	88.4447	86.0452	82.8755	83.1318	77.5316		98.3772	94.8642	93.5737	91.6486	90.2706	92.2324	88.6724	85.1946			97.3935	92.4107	96.3536	91.9492	90.1928	89.2625	87.5821	83.364		96.2623	93.2809	94.8663	91.2212	89.6489	89.6617	88.911	84.787			0.703383
	0.703383	94.6828	95.8857	92.229	92.4429	87.4611	86.8582	83.2443	82.0713		101.492	94.676	92.9134	89.3209	83.0342	80.187	81.0157	78.6709		97.8186	96.2963	94.8276	91.269	87.9678	89.4801	86.1145	83.5992			99.8194	92.9018	94.4056	91.6843	89.4766	88.0826	87.2239	82.0135		96.1477	92.4589	92.2995	90.6584	86.9855	88.9724	86.919	83.5024			0.767183
	0.767183	94.6828	94.5905	92.7607	92.7504	86.4829	84.1733	82.6129	79.5799		97.0372	94.3245	91.0236	88.609	83.6132	81.0637	80.3507	74.0506		100.505	95.9506	93.6782	90.564	86.7588	88.5015	85.81	82.1315			96.8516	92.2768	92.5574	91.3665	90.303	88.3186	84	81.0313		95.5973	92.6376	92.7807	92.4029	90.0726	86.2155	85.8566	81.6092			0.83125
	0.83125	96.859	92.4571	90.9202	91.5202	85.0156	85.1625	80.9131	78.3097		98.724	93.119	91.3386	88.1161	83.729	79.3103	77.5695	72.0253		98.3772	95.9012	92.2153	88.6117	87.2193	87.5229	84.1657	79.7064			97.1613	90.4018	93.2068	92.2669	87.8237	86.9027	84.597	81.5224		95.4368	94.0315	94.8128	91.6151	88.0751	86.9674	84.1301	82.691			0.895033
	0.895033	94.108	94.019	91.3701	92.1353	85.4157	84.4089	81.1559	77.6258		98.3131	93.1693	90.2362	87.3494	82.6288	77.4985	75.8162	71.3291		98.1378	95.7037	92.1108	88.8829	87.5648	86.8502	82.0341	79.7703			98.7355	94.375	91.7083	89.2479	88.0992	86.4307	83.2239	81.2769		96.9273	94.1744	93.4759	90.9398	86.3196	85.6516	85.591	79.8513			0.95885
	0.95885	97.1258	94.4381	92.1472	91.8717	84.482	82.4776	81.4959	78.8471		97.2535	92.4661	88.4514	83.954	80.6601	77.9661	76.4813	69.8734		99.734	94.6173	91.2226	88.2321	84.053	87.2171	83.7393	79.5788			97.2645	90.4464	92.0579	88.6123	87.1625	85.8997	83.8806	78.9441		95.047	93.2452	92.1925	88.3512	84.5642	84.1479	82.6029	80.0541			1.02292
	1.02292	96.7768	93.4095	91.6973	88.7522	83.1481	83.8907	78.9704	75.574		102.379	93.1693	91.2861	84.9398	79.7915	74.6932	73.7001	69.8734		98.457	95.4074	91.745	86.8221	84.2832	84.7706	82.5213	78.0472			98.529	90	91.7582	90.8898	84.6281	82.9499	83.2239	79.1897		95.2075	90.5647	88.7166	87.7321	84.2615	84.5865	80.9429	79.1075			1.0867
	1.0867	95.7504	92.3048	90.9611	88.225	84.1707	80.4522	78.0476	74.3039		100.13	91.5118	89.3963	84.8302	78.923	72.9982	73.5187	68.7342		96.7545	94.0247	92.6855	87.744	83.4773	85.5046	80.8161	75.8775			98.6839	92.1429	91.958	88.1356	86.1157	84.3068	80.6567	77.8392		95.5744	91.1723	91.7647	90.5459	84.7458	84.4612	80.9429	77.4848			1.15052
	1.15052	94.5802	92.9905	89.6933	88.3128	82.5256	80.7348	79.0675	72.8872		99.5458	91.7127	87.979	84.5016	77.707	73.1151	71.8259	68.5443		95.7702	94.321	90.4389	86.8764	81.7501	84.6483	79.3544	76.388			98.3484	89.375	92.1079	89.3008	85.124	82.5959	80.3582	78.6986		94.4279	90.9221	91.123	88.6325	84.0799	83.2707	77.9548	76.6734			1.21457
	1.21457	94.8676	92.1143	90.1431	89.1037	83.1481	79.8398	75.5221	73.3268		98.5727	89.8041	87.2441	82.4206	78.0544	70.9527	70.0726	65.6329		97.1535	94.1235	88.7147	86.3341	83.1318	81.5902	79.3544	76.1966			96.4903	90.7589	90.01	88.4004	83.8017	81.4749	79.4627	74.3401		94.9324	91.2795	92.4064	87.1694	83.2324	81.7043	80.8101	75.9297			1.27837
	1.27837	97.598	92.5333	90.7975	88.8401	83.1481	81.3	76.6391	72.3009		96.2154	91.3109	86.5617	81.3253	78.1702	68.9071	69.9516	64.4304		98.5634	94.2716	91.0136	85.2495	82.441	80.9174	78.6845	74.8564			97.0323	89.2857	91.0589	85.6462	81.5978	82.5369	78.2687	74.647		93.4189	89.8142	89.4118	86.6629	84.322	78.8847	78.2869	74.9155			1.34243
	1.34243	94.7239	91.3143	88.4254	87.7417	80.08	78.0028	76.9791	72.0567		95.6964	91.4114	84.6719	81.4896	75.5646	69.8422	69.0447	63.1646		95.5839	94.1728	88.6625	85.7375	82.1531	80	76.8575	72.6228			97.6774	88.3036	89.7602	87.0233	82.8099	80.944	76.6567	73.2965		94.1756	91.6726	89.1979	87.2257	83.4746	79.6992	78.6189	74.2394			1.40623
	1.40623	95.1345	94.0571	90.6339	88.9719	79.9466	78.0499	75.3278	69.9072		96.41	90.8086	85.5118	80.4491	76.0278	68.6148	68.2588	63.038		96.1426	95.6543	90.5434	84.8156	81.7501	80.5505	76.8575	72.3038			94.8129	91.5179	88.6613	84.7458	81.8182	80	76.1194	72.0688		94.2903	89.5997	88.9305	85.7625	81.8402	79.1353	77.3572	73.1575			1.4703
	1.4703	94.6007	91.1238	91.2065	89.8946	80.9693	76.4484	74.745	70.0537		100	90.4068	85.5118	79.9562	73.0747	67.329	66.8077	61.8354		96.7279	94.2716	88.976	85.141	79.5625	81.3456	76.9793	72.559			95.1742	86.2054	88.3616	83.9513	79.7796	79.115	77.1343	72.8668		93.8776	89.5997	87.754	85.9313	81.2349	78.3835	76.9588	72.3462			1.53435
	1.53435	95.6888	93.5619	89.8978	86.8629	79.502	75.9774	74.7936	69.4187		97.2535	89.5028	84.4619	79.5728	74.2907	68.3226	65.1149	60.8228		95.9298	93.1852	89.3417	84.7072	78.4111	80.6728	75.944	71.8571			97.5226	90.4911	88.8611	86.6525	80.2204	79.469	74.7463	72.9896		94.1756	90.7791	87.7005	85.256	80.6295	76.6917	75.498	71.3996			1.59815
	1.59815	95.5861	93.6	89.4888	85.0615	80.4802	76.731	73.628	69.0767		98.0536	88.5987	85.7743	78.8061	72.7273	66.9199	64.0266	60.2532		96.382	92.2963	86.9906	84.0022	81.9804	80	74.7259	70.8998			97.4194	89.8661	89.2108	84.322	81.6529	77.8761	74.1493	72.0688		93.8776	88.9921	88.984	84.018	79.9637	78.3208	74.5684	69.7093			1.66222
	1.66222	94.7855	91.4286	89.3661	85.8084	79.1463	76.7781	73.9194	68.7836		96.2803	87.6444	85.1969	77.9299	72.4378	65.6341	63.3615	60.3165		95.2381	91.4074	87.722	82.7549	79.1595	78.2875	74.2996	69.9426			95.0968	90.6696	88.012	85.7521	79.8347	79.233	73.6716	71.3935		93.5107	89.3138	88.6096	83.4553	80.0847	75.188	76.0956	68.6951			1.72603
	1.72603	95.7914	92.419	87.1166	86.5554	78.3015	75.6006	71.491	67.9531		99.0701	87.5942	85.1969	78.8061	72.7852	65.6926	62.0919	59.2405		96.8609	92.7407	87.6176	82.7549	77.3172	78.3486	73.6297	69.1768			95.6129	87.6786	88.3616	84.322	77.6309	76.1652	73.2537	69.1835		93.8088	88.7062	87.6471	82.6674	78.3898	75.3133	72.7092	70.0473			1.79008
	1.79008	96.551	90.5905	88.589	88.0931	77.9013	73.7164	71.3939	69.5652		98.4862	88.3978	84.4094	75.356	72.4378	63.647	61.9105	57.4684		98.8295	92.0494	88.6102	81.8872	78.1808	76.2691	70.9501	69.113			95.7161	89.4643	87.5125	82.2034	78.6777	76.9322	72.597	69.9816		93.4189	89.1351	85.8289	83.2302	79.3584	73.8095	72.7756	68.7627			1.8539
	1.8539	95.0318	89.8286	87.9755	83.6995	76.3006	72.9157	71.3453	66.7318		96.9939	88.0462	83.2021	78.9157	72.0324	63.4132	60.7013	55.5696		96.5416	91.3086	88.2968	82.538	78.3535	76.6972	73.9951	69.1768			95.9484	89.1964	87.6623	82.3093	78.3471	76.5192	73.1343	69.7974		92.4559	87.8485	86.738	82.2735	78.0266	75	70.6507	68.2218			1.91795
	1.91795	94.2517	90.5905	89.4479	84.2707	75.6781	72.9157	71.7824	66.341		96.0208	88.2471	85.0919	76.8346	71.0481	62.7119	59.3108	55		98.5102	92.4444	86.8861	83.6768	75.3022	74.0061	72.9598	65.5392			95.8968	88.0357	87.7622	82.4153	77.3003	74.4543	72.4179	68.2627		94.405	87.6698	86.6845	83.5115	76.6949	73.8722	73.2404	65.7877			1.98175
	1.98175	96.161	91.2762	85.8078	84.9736	77.012	73.3867	68.7712	66.7807		99.1782	87.996	82.0997	78.149	68.9056	61.6014	59.0085	53.5443		97.2067	92.1481	87.3041	83.4599	76.8566	75.4128	71.9245	68.0281			95.3548	89.1964	87.8621	83.8453	77.5758	75.5752	70.4478	69.6133		94.0151	89.8499	87.2727	82.4986	77.3608	73.9975	72.3108	66.8695			2.04555
	2.04555	93.8206	90.1714	86.4213	85.2373	77.2343	73.1983	69.7426	64.3869		96.8209	84.6308	81.2073	75.9036	68.0371	60.6078	57.9807	53.9873		97.0471	92.8889	85.6844	80.9653	75.5901	72.5382	71.1937	67.6452			96.4129	86.8304	86.7133	81.4089	76.1433	75.1622	70.0299	67.8944		91.8367	87.1337	85.6684	82.1047	74.8789	73.5589	70.7835	66.7343			2.10987
	2.10987	94.7239	89.2952	87.5665	83.5677	78.257	72.4447	68.7227	65.2662		96.7128	87.5439	84.147	75.7393	68.674	61.0169	59.1898	53.5443		95.0253	91.0617	85.9457	80.7484	76.0507	74.7401	69.6711	66.4965			94.8129	87.8571	87.013	83.5805	76.7493	73.9233	69.194	66.4211		91.9514	87.5983	83.3155	80.8666	76.5738	72.4937	70.5179	65.1116			2.17367
	2.17367	96.3662	89.6381	86.1759	84.5343	74.1218	72.7273	68.7227	63.5076		97.167	85.6856	81.4698	76.287	68.095	59.9649	57.6784	52.5316		96.9407	91.358	86.1024	81.9414	74.6114	74.1284	68.8794	64.9011			96.3355	89.6875	85.964	80.2436	74.5455	72.6254	69.194	65.5617		93.3731	86.9907	86.2032	80.0225	74.8789	71.7419	68.7915	65.5172			2.23773
	2.23773	94.9292	88.8	84.0082	83.348	73.8995	71.4084	68.0427	64.3869		96.41	86.9412	82.5197	73.8226	66.9948	60.1987	55.8646	51.7722		95.2647	92.7407	85.371	81.0195	75.475	73.1498	69.6102	64.3267			94.9677	86.7857	86.2138	80.4025	74.5455	73.5103	69.0746	67.4647		93.8546	86.7763	85.2406	79.91	75.6053	71.4912	69.2563	65.1116			2.30153
	2.30153	96.6742	88.1524	84.8671	82.8207	75.189	71.4084	66.8771	62.2374		94.4637	86.7906	80.6824	74.4797	67.5159	59.9065	56.0459	50.6962		96.6746	92.1975	86.1546	80.1518	73.9206	72.7217	69.4884	65.1563			95.0968	87.6339	85.1149	79.3962	74.0496	72.1534	67.5821	67.0964		92.7081	87.9199	85.508	79.0096	75.7869	72.4937	68.1939	62.8803			2.36533
	2.36533	95.6272	92.5333	85.4397	84.1828	74.6554	72.2562	66.5372	62.4817		97.4913	85.334	81.6273	74.6988	67.1106	58.6791	55.7437	50.1899		94.7326	90.7654	84.6395	78.7961	73.863	72.6606	68.1486	63.4333			94.3226	86.7857	85.2647	80.5085	73.8292	73.6283	68.2985	65.1934		93.9005	86.2759	84.0107	77.9966	75.1211	71.9298	67.3971	63.7593			2.42913
	2.42913	96.3662	88.3048	86.4213	82.9525	74.6554	70.8431	64.8859	62.8725		97.2967	85.786	81.3123	72.2344	66.4157	57.3349	55.26	50.5063		96.4884	90.4691	84.326	80.7484	73.2297	73.3945	67.9659	63.0504			94.529	87.9464	84.3157	80.0847	74.4904	72.0354	66.5075	65.0092		93.3043	86.0972	83.5294	80.1913	73.5472	70.4261	68.7251	62.6099			2.49295
	2.49295	94.0875	90.3619	85.8078	83.0844	75.1445	70.8902	66.0029	62.4328		98.5727	84.3797	80.8924	73.0559	65.6051	57.6271	53.8694	48.8608		96.7811	88.8395	86.2591	79.3384	71.9056	72.4771	66.0171	64.0077			93.9871	86.7411	85.1648	78.8665	73.0028	71.9764	66.2687	64.7637		92.754	87.6698	84.5455	80.5853	74.0315	70.4887	66.8659	63.4888			2.557
	2.557	93.6358	90.4381	85.317	82.1617	72.2099	68.8648	65.3715	62.2863		97.5779	86.2883	80.4199	71.4129	64.0417	56.2244	53.688	48.1646		96.515	88.1975	84.4305	79.0672	74.4387	70.948	66.3216	61.5826			95.4581	88.7054	85.4645	80.4025	74.4353	71.7404	66.806	62.4923		94.9324	87.8485	82.7273	77.7715	74.3947	68.3584	66.8659	61.1224			2.6208
	2.6208	95.3398	90.2857	85.8487	83.7873	73.5883	69.1474	66.0515	60.5765		96.41	85.5851	79.3701	71.2486	64.447	56.5751	53.6276	47.2152		97.0471	88.4938	85.371	78.9046	72.7691	71.682	67.3569	61.5188			94.9677	88.2143	85.6643	78.8665	74.9311	69.8525	67.1642	64.2726		93.3272	86.9192	84.9733	78.4468	72.6998	67.9198	66.8659	61.8661			2.6846
	2.6846	94.0875	91.1238	84.7444	81.5466	72.3877	70.2779	64.8373	61.3092		97.5779	86.1376	80.1575	71.4129	63.9259	56.9258	52.4788	48.2278		95.3179	89.7284	82.1839	79.5011	73.863	70.3976	65.5298	60.8807			98.2452	87.5446	84.7153	80.2436	73.5537	70.2655	65.9701	64.2726		92.0202	84.9893	84.0107	78.3343	73.1235	69.5489	67.7955	60.7843			2.74867
	2.74867	96.7153	89.0286	86.2168	81.5026	72.1654	67.9699	63.6717	61.3581		97.3183	84.2793	78.8976	71.1939	62.8257	57.1596	53.2044	47.2785		95.4509	89.7778	82.3929	78.6334	71.6753	69.052	65.8343	59.3491			95.6645	87.0536	86.014	80.4555	71.0744	70.2655	65.3731	64.6409		93.4648	85.847	83.7968	78.4468	71.6707	67.9198	64.6082	60.3786			2.81273
	2.81273	96.0378	87.7333	83.2311	79.5255	71.0538	68.2525	64.4973	60.0879		94.8097	84.0281	78.9501	71.1391	60.857	56.5167	53.5067	46.519		95.9564	87.7531	84.535	76.9523	71.1572	69.5413	65.5907	60.3063			93.1871	86.0268	83.4166	79.0784	72.6171	70.2065	64.9552	61.8785		91.9972	86.955	84.385	77.9403	71.3075	69.3609	64.2098	60.5139			2.8768
	2.8768	94.2517	89.1429	84.6626	82.2056	73.1436	66.2741	64.1574	59.3552		96.4749	85.0829	79.8425	71.3582	61.8413	55.114	51.6929	45.6962		96.0096	87.5062	82.0272	76.8438	71.5026	67.5229	66.0171	60.0511			94.6065	85.1786	83.7662	77.6483	71.1846	68.9676	63.1642	62.3082		91.424	84.9535	83.5294	77.5464	72.3971	67.6065	65.1394	60.4462			2.9406
	2.9406	93.8411	90.4381	83.7219	80.0967	72.1654	66.9336	64.1574	60.2833		96.41	82.8729	80.5249	71.0296	62.0151	54.9971	50.9069	44.9367		95.6637	90.1728	83.6991	78.1996	71.3299	69.052	65.0426	59.7958			94.9935	86.2946	81.7682	78.178	71.8457	68.3186	64.1791	60.1596		92.6164	84.9893	84.5989	76.4772	71.6102	67.5439	65.7371	61.0548			3.0044
	3.0044	95.6067	88.1905	83.8855	78.6467	71.3651	66.4154	61.4376	57.9384		96.8426	83.5761	79.8425	72.1796	61.2623	53.2437	50.6046	44.6203		96.4884	88.9383	82.2362	76.6269	70.5239	69.6024	64.4945	59.9234			95.9742	86.6071	83.5165	79.5551	71.3499	69.1445	63.7612	61.1418		91.745	85.0965	83.0481	75.9707	70.2179	67.3559	63.2802	59.973			3.06845
	3.06845	94.6212	88.4571	81.6769	81.7223	71.5429	68.017	60.9519	58.7689		95.6747	84.4802	79.4751	71.1939	62.1888	53.0099	51.1487	43.9873		95.7968	90.5679	82.7064	76.5184	68.5665	69.1131	65.408	59.1576			95.7161	87.0982	83.1169	74.7881	71.8457	67.4926	63.2239	61.019		92.754	86.5618	81.8717	77.7153	69.6731	67.0426	62.9482	60.2434			3.13227
	3.13227	96.7974	86.781	83.5992	79.6573	69.7199	66.9807	61.4376	58.5735		95.8478	85.1331	78.0052	68.5652	61.4939	52.1917	49.8186	43.481		94.6262	89.037	83.8036	75.6508	69.6028	68.4404	65.408	59.3491			94.4	87.0982	82.5674	76.4831	70.303	67.7876	65.2537	61.0804		92.8457	85.6683	82.3529	76.5898	71.1259	65.1629	64.0106	57.7417			3.19607
	3.19607	94.7444	88.4952	82.2086	82.2496	69.6754	65.285	60.9034	57.3034		95.718	84.0281	77.6378	69.989	61.2044	52.1917	50.3023	43.2278		97.3397	88.1975	81.9227	77.5488	69.6603	67.4618	63.6419	59.3491			94.9677	86.6518	82.967	77.4894	70.7989	67.4926	63.8209	59.5457		92.41	86.2759	82.6203	77.8841	69.8547	66.3534	61.421	58.1474			3.26012
	3.26012	95.0113	87.4667	83.4356	79.7452	69.1863	65.756	62.0204	57.8407		96.4749	83.3752	77.5853	68.6747	59.8147	52.4255	49.2745	42.7215		97.0205	89.4321	84.4305	78.1996	70.0058	67.4618	62.7893	57.8175			97.2129	83.8839	85.1648	75.7945	71.2397	66.9617	62.806	60.221		93.2355	86.8477	82.139	75.9707	69.7942	66.4787	63.413	58.215			3.32418
	3.32418	95.504	88.6476	83.4765	79.7891	68.4304	64.7197	60.8548	57.5476		93.3824	82.9232	77.0604	68.7295	59.4094	51.1981	49.5163	42.6582		98.3772	90.2222	83.6991	78.2538	69.3149	67.7064	62.5457	56.8602			96.0258	85.6696	81.1688	76.6419	70.0826	66.7847	62.806	58.9319		92.8915	85.7756	82.2995	75.6331	70.2785	64.1604	62.085	57.2684			3.38798
	3.38798	94.7239	89.2571	81.3906	77.812	68.3859	64.0603	60.1263	56.9126		95.9775	82.7223	77.3228	66.6484	59.2936	51.2566	48.1258	43.038		95.1051	88.2963	83.1243	74.8915	69.3725	68.1346	62.363	57.1155			95.6129	85.5804	81.4186	75.1589	68.8705	66.3717	62.2687	59.116		93.2126	85.847	82.0321	76.1958	68.4019	65.2882	62.8818	57.6065			3.45178
	3.45178	95.8119	87.8857	83.272	79.3497	69.4531	63.9661	60.3691	55.5447		95.5017	83.8272	77.1129	68.0723	58.3671	51.8995	48.7304	41.8987		97.2599	89.7778	82.9154	74.7289	68.9695	66.3609	61.6931	56.9241			95.4065	86.3393	81.7183	76.4301	67.438	65.6637	61.5522	58.6863		91.7221	86.0972	82.0321	75.3517	67.6755	64.7243	61.3546	55.9838			3.51585
	3.51585	95.2782	85.981	83.5174	77.1529	68.8306	64.1545	58.2807	55.7401		95.7396	82.6218	76.378	66.8127	57.846	50.3799	46.4329	40.3165		96.5682	90.1235	81.7659	74.295	66.4364	65.4434	61.3886	56.8602			96.4387	87.0982	81.2687	74.3644	67.8237	66.7257	61.3134	57.9497		91.6533	87.2051	81.2834	74.2825	68.2809	64.8496	62.749	54.5639			3.5799
	3.5799	96.8795	87.0476	83.9264	78.6907	67.9413	63.9661	59.932	56.7171		96.6696	83.0738	76.4829	67.3056	57.4986	50.1461	46.0701	42.0253		96.1692	87.6049	81.7659	75.705	68.1059	64.893	60.3532	56.7964			95.5871	84.7321	83.0669	75.1589	67.7135	66.8437	62.3881	59.423		90.5756	86.5261	81.123	74.0574	68.5835	62.7193	60.6906	55.6457			3.64398
	3.64398	92.0345	87.0095	81.5133	77.2847	66.3851	64.0132	59.1549	55.0562		95.9126	82.3204	77.4803	67.2508	58.0776	49.4448	46.7956	40.1266		96.382	87.6049	82.2362	76.3557	67.8756	65.6269	59.5615	55.5201			95.6387	86.0714	83.4166	74.3644	66.9421	65.2507	62.0896	57.4586		93.0979	85.3467	81.0695	74.789	68.2809	64.6617	61.5538	55.9162			3.70777
	3.70777	93.6563	86.4762	83.0675	77.4605	66.8742	63.7306	57.6008	55.447		94.3339	84.4299	75.3806	67.7985	56.9195	50.4383	46.4329	40.3165		96.0628	89.0864	80.4075	73.8612	67.4151	65.3823	60.7795	56.4135			94.7355	85.8929	81.9181	75.4767	67.989	65.8407	61.1343	57.0289		91.1947	85.5254	80	75.8582	66.1017	63.5338	59.4954	55.3753			3.77183
	3.77183	94.9292	86.5524	81.3906	78.7346	66.8297	62.6472	58.6693	54.3234		93.1012	82.0693	75.853	67.3056	56.8616	48.9188	46.4933	39.8101		95.0785	88.5432	80.6688	75.3796	68.4514	66.055	58.9525	55.5839			95.5355	84.375	79.8202	75.7945	67.4931	64.9558	60.0597	56.2922		93.1667	87.2766	80.6952	74.2825	66.707	63.8471	60.0266	54.4963			3.8359
	3.8359	96.6331	87.4286	83.8855	76.6696	66.9631	63.2595	58.9121	54.9585		93.2093	83.8272	73.3858	65.3888	55.1824	47.7499	45.2842	39.6203		96.249	87.1605	81.4002	75.4338	67.7029	65.2599	59.6224	55.201			95.1742	86.6518	81.019	74.3644	66.9421	65.1917	61.0149	56.7833		93.075	85.7041	81.2834	71.5813	68.2203	62.594	59.0969	53.5497			3.89997
	3.89997	95.7504	86.0571	82.1677	76.8453	68.4304	63.8719	57.9407	53.1998		97.1021	80.6128	74.5407	64.8412	55.1824	47.9252	44.2563	39.4304		95.2115	88.0494	80.4075	73.9154	67.4151	65.0153	59.257	55.2648			95.4839	85.2679	80.6693	73.8877	66.5565	63.1858	60.1194	55.6783		92.5247	84.9535	78.4492	74.9578	66.3438	62.594	60.093	54.6991			3.96403
	3.96403	92.9789	86.4	82.5358	77.4605	66.1183	62.082	57.1151	54.8608		95.1341	81.1652	75.4856	65.4984	55.7035	47.2238	44.6796	39.0506		96.8875	87.7531	80.094	72.4512	66.4364	65.6269	59.5615	54.499			96.8258	86.9643	81.7183	74.7881	66.6116	62.6549	57.8507	56.1694		90.8737	85.9543	78.984	73.7198	66.4649	60.8396	59.4954	53.9554			4.02783
	4.02783	95.0729	86.5905	80.5317	75.7469	66.9631	61.5167	56.1438	53.3464		94.5285	80.2612	76.273	64.7864	55.8193	46.8732	44.6191	38.7342		96.116	88	80.1985	72.2343	66.2061	63.1804	59.9269	53.1589			95.3548	83.3482	79.6703	72.6695	65.8402	63.0678	58.9254	55.2486		93.9234	86.2759	79.5722	72.7631	66.3438	61.4035	59.2961	53.4821			4.09188
	4.09188	93.4305	86.5524	81.0225	75.4833	66.7408	62.0349	56.8723	52.2716		94.9827	81.4666	74.8031	65.7722	53.9664	47.1654	44.6191	39.2405		95.2115	86.4691	80.303	72.9393	66.8969	64.3425	60.5359	53.0313			96.9032	84.2857	78.6214	72.8814	65.6198	62.9499	57.6119	54.5734		92.089	86.5618	80.0535	73.1007	66.6465	62.218	58.6321	53.9554			4.1557
	4.1557	93.2047	85.8667	81.7587	74.9561	65.0956	61.6109	57.5036	52.8578		95.6747	81.2155	73.2808	64.6221	55.414	46.1718	43.4099	37.9747		95.8234	85.3333	82.1839	74.5119	64.9971	62.2018	57.2473	54.5629			93.7548	86.7411	80.3197	72.6695	65.9504	62.1239	58.1493	54.5734		91.2635	85.5254	79.3048	71.919	64.0436	61.2782	57.9017	53.2792			4.21948
	4.21948	93.7179	86.2476	81.9632	76.0545	65.0511	61.0457	55.1238	52.1739		95.8694	82.1195	73.8058	63.5816	53.9664	46.6978	42.9262	37.7848		95.4509	86.8642	79.8328	71.2581	66.2637	64.0367	58.1608	54.18			94.0903	85.2232	79.1708	71.7161	65.6198	62.0649	57.1343	54.7575		91.2405	86.5618	79.7326	72.7068	65.4964	62.0301	57.6361	51.7241			4.28355
	4.28355	94.1901	86.4	80.7362	73.7258	65.0067	61.8935	56.338	52.4182		96.4533	81.1652	73.3858	62.4315	54.4876	46.2303	42.8658	37.3418		94.5464	88.5926	81.1912	71.8547	65.4001	62.0183	57.9781	52.5207			94.3742	83.6607	79.7203	72.6695	65.2342	63.0088	58.6269	53.8981		91.9514	85.2752	79.7861	71.4688	65.799	61.5915	58.1009	51.4537			4.34735
	4.34735	96.2841	84.9143	79.3456	74.2531	66.2517	62.1762	55.6581	52.0274		96.9939	79.4576	74.0682	62.5411	53.1558	45.5874	42.6844	36.3291		95.7968	86.5185	79.3626	71.9089	64.479	61.1621	57.6736	51.372			95.4065	84.5982	79.021	72.7225	62.865	62.1829	56.7164	54.5734		92.9833	85.6326	78.5027	73.776	64.6489	59.5865	56.3745	53.8201			4.4114
	4.4114	96.9206	85.3333	81.0634	75.7909	66.5629	62.5059	53.8125	52.467		95.9126	81.0146	74.1207	63.5816	51.4765	44.8276	42.2007	36.4557		94.7326	87.8025	80.3553	71.7462	65.2274	63.0581	56.5773	52.074			96.3097	85.8036	78.6713	72.8284	62.8099	59.823	57.5522	54.3278		91.8826	86.5618	78.4492	73.1007	65.9806	59.8997	56.6401	51.3185			4.47547
	4.47547	95.8119	85.7905	80.8589	75.2636	65.4513	59.9152	55.3181	50.8549		95.199	82.0693	74.9606	64.5126	53.04	45.7627	42.8658	36.7722		96.0362	86.8148	80.0418	72.0716	65.8031	61.1621	56.5164	52.7122			94.8645	85	79.9201	72.7754	64.7383	61.7109	57.9104	54.8189		91.8826	84.5604	76.2032	70.1745	64.4068	59.2105	55.7769	50.3719			4.53927
	4.53927	97.4749	86.4762	81.0225	76.2742	65.1401	59.6797	53.9582	51.3923		93.923	80.3616	73.0709	62.9792	53.5032	45.7627	41.052	35.5696		95.8766	86.0247	80.1463	72.0716	64.1911	62.263	57.7954	51.6273			93.3419	84.8661	79.97	71.0275	64.2424	61.2389	55.3433	53.4684		92.6164	84.5247	78.2888	71.5813	63.9831	60.6516	56.2417	50.5747			4.60333
	4.60333	98.4603	86.4	78.5276	75.8787	65.0067	60.1978	55.5124	50.9038		95.1125	79.5078	72.2835	61.6101	52.6346	43.9509	42.1403	35.5063		95.4775	86.6173	78.8401	72.18	62.4064	60.9174	57.3082	51.1806			96.8774	84.7768	80.3197	71.4513	62.9201	60.531	55.403	52.9773		90.5526	84.5247	76.6845	70.0619	64.77	59.8997	55.9761	50.5071			4.6674
	4.6674	93.9437	86.5524	78.6503	73.4622	64.0285	59.3971	54.3953	51.4411		92.9498	80.2109	72.9659	61.8291	52.2293	44.1847	41.838	35.2532		95.1583	87.9012	79.1536	72.1258	63.4427	61.5902	56.76	50.7339			91.5097	85.2232	78.5714	71.2394	63.5262	58.1711	55.6418	51.9337		92.089	84.2387	77.9679	70.6246	63.2567	57.3935	54.9137	50.9128			4.73118
	4.73118	95.0729	84.1905	78.4049	74.5167	63.8061	57.8898	53.5697	51.1969		95.7396	78.0512	72.7034	60.7338	53.04	43.1327	40.9915	36.1392		95.6105	84.7901	77.9519	72.2343	62.6367	60.9786	56.2728	51.2444			96.6452	83.8839	77.972	71.3453	65.2342	60.295	55.5821	51.9951		92.2495	85.025	77.6471	70.0619	62.7724	58.4586	54.6481	49.8986			4.79503
	4.79503	96.4484	85.4476	79.6728	75.3515	62.3388	58.0311	52.5983	51.0992		95.1341	80.4119	72.7559	60.8981	51.824	43.5418	40.266	36.0127		94.1474	86.1235	79.2059	72.0716	62.4064	61.4679	55.2984	50.1595			94.9161	84.6429	79.7203	70.2331	63.9118	62.0059	55.7015	52.5476		92.3412	84.06	75.8289	69.2178	62.7724	58.4586	56.3081	50.3719			4.85907
	4.85907	93.4305	85.3333	78.364	73.0668	62.9169	60.292	53.5211	50.5129		95.3936	77.6996	72.4934	62.8697	51.8819	43.2496	41.1729	34.8734		95.0253	86.8148	78.9446	71.1497	60.9096	60.7339	54.1413	50.6701			94.7097	85.2232	75.3746	69.8623	63.5262	61.2979	55.0448	51.8109		91.2176	84.6676	76.3636	68.4299	62.5908	57.3935	55.3785	49.0196			4.92287
	4.92287	94.3133	86.5905	80.6544	73.4183	63.0947	58.2666	53.2783	49.1939		94.442	80.2612	72.5984	61.5005	51.824	42.9573	41.4148	35.9494		94.7326	85.4815	78.8401	70.6616	61.9459	60.6728	54.933	51.6273			95.2774	85.0893	76.973	71.5572	63.7466	59.41	55.6418	52.0565		91.2176	83.4882	76.0963	69.6117	62.8329	57.9574	53.9841	50.0338			4.98693
	4.98693	95.1755	84.3429	81.3497	74.7803	61.8052	58.6905	53.2297	49.1939		94.6367	78.1517	73.1234	62.5411	50.1448	42.1975	40.0846	34.3038		95.9032	86.5185	76.3323	72.5597	62.1186	60.6728	54.324	52.6484			95.8968	84.5536	76.4735	71.5572	62.259	60.531	54.806	51.3812		92.6393	84.06	75.9893	69.7805	63.5593	56.3283	53.8513	49.0872			6.25427
	6.25427	94.6418	36.8762	32.3517	31.0633	27.9235	27.9793	25.4492	25.1099		100.043	17.1271	14.0682	13.6364	13.839	11.9813	11.971	11.4557		89.3589	39.9012	35.5277	32.7007	31.3184	31.4985	29.0499	28.0791			91.4839	35.4018	35.015	33.4746	32.3967	32.7434	29.1343	30.4481		87.0672	56.4689	33.7968	30.5571	30.8717	29.1353	27.6892	27.6538			6.31798
	6.31798	95.155	36.9143	31.411	30.0527	27.2121	27.4611	24.5265	24.3771		100.216	17.0768	13.3333	12.1577	12.2177	10.8124	11.3059	10.3797		91.5669	39.4568	35.162	31.6703	30.0518	30.7645	28.8063	26.2923			90.1935	37.1875	34.8651	32.6271	32.1212	31.2094	29.194	29.5273		87.9844	56.4689	33.3155	30.1632	29.7821	28.5714	27.5564	26.3016			6.38205
	6.38205	93.5332	36.1524	31.6564	30.3163	26.6785	26.5191	23.8465	23.1558		96.237	16.9764	13.7008	12.1577	11.1175	9.99416	10.0967	10.0633		90.9018	39.2593	34.4305	31.5076	30.9154	30.3364	27.7101	26.6752			92.2065	36.0268	35.1648	32.9979	30.6887	31.0914	27.1045	28.4223		87.8927	56.2902	33.1016	30.332	29.7821	27.8195	27.2244	26.2339			6.44585
	6.44585	94.9497	36.1524	31.2065	30.0088	26.8564	26.2836	23.3609	23.1558		98.6592	16.5746	13.5433	11.4458	10.7122	9.81882	9.79444	9.17722		90.7422	39.0617	34.2215	30.5857	30.2245	29.3578	27.2229	25.9094			90.4516	35.4018	35.6643	32.0445	29.8072	29.6755	27.403	28.1154		89.3832	55.9685	31.7647	29.9381	28.8741	27.8822	26.162	26.2339			6.5099
	6.5099	93.5742	36.7238	31.7382	29.174	26.1894	26.3778	23.6523	22.8627		98.0536	16.675	12.5984	11.2815	10.4227	9.76037	9.43168	8.67089		91.0348	39.3086	34.1693	31.0738	28.8428	29.2355	26.4921	25.335			89.1097	34.9554	34.6154	32.0975	30.0826	29.3805	27.5821	27.6243		87.778	56.6119	31.5508	29.2628	28.8741	27.6316	26.6932	25.7606			6.57372
	6.57372	90.1458	36	32.7198	30.0088	26.3228	25.2473	22.778	22.5208		96.3668	16.7253	13.0709	11.0077	10.3648	8.82525	9.31076	8.48101		91.1147	39.358	34.117	30.8026	28.7277	29.3578	26.7966	25.3989			90.5548	35.7143	35.8142	31.5678	29.4215	28.9676	26.209	27.1332		87.6404	56.8263	33.2086	28.9814	28.753	27.7569	26.494	25.355			6.63752
	6.63752	93.3484	36.419	31.8609	29.7452	25.6114	25.1531	22.4381	21.5926		96.9291	16.3235	13.0709	10.7886	10.0174	8.88369	8.64571	7.97468		89.5983	38.2716	33.1243	30.5315	29.361	28.2569	26.0049	24.7607			89.8581	35.7143	35.015	31.8326	29.2011	29.0855	25.9701	26.5193		87.5946	56.5404	32.7807	29.3754	28.632	26.9424	25.5644	25.4226			6.70157
	6.70157	93.2252	36.8762	31.4928	29.7012	25.2112	25.2002	22.5838	21.8368		97.1021	16.6248	13.1234	10.5696	10.4227	8.82525	8.58525	8.16456		89.7047	39.6049	33.3333	30.6399	28.3247	28.9297	26.3094	24.314			91.2774	35.4464	35.3646	32.6271	28.4848	29.4985	26.0299	26.0282		88.6035	57.6483	32.0321	28.6438	28.2082	26.8797	25.6972	25.2197			6.76537
	6.76537	94.2517	36.9524	32.2699	28.9982	25.7003	25.2473	22.001	21.9834		98.5294	16.4741	13.1759	10.4053	10.4806	8.1239	8.52479	7.59494		93.3227	38.716	34.0125	30.1518	28.7277	28.5015	25.3959	24.3778			89.7032	35.0446	33.966	31.8856	28.9256	28.4956	26.0896	25.5371		88.5806	58.0057	31.6043	29.2628	28.4504	26.5664	25.8964	24.2732			6.82943
	6.82943	93.4305	36.419	32.3517	29.3058	25.8337	24.3994	22.1952	21.1529		96.8426	16.1728	13.0184	10.6791	10.0174	8.1239	8.40387	7.53165		89.8643	39.358	34.953	30.9653	28.4398	28.1346	26.1267	24.3778			90.7355	35.6696	34.016	31.8856	29.5868	28.5546	25.1343	25.5985		89.2456	57.97	32.7807	28.9252	28.5109	26.6291	25.0996	24.7465			6.89332
	6.89332	92.9994	36.0381	31.6155	28.471	25.2557	24.8705	21.0782	20.9575		97.34	16.5244	13.0709	10.241	10.0174	8.35769	8.10157	7.27848		89.4387	39.2593	34.8485	31.2364	28.7277	27.8899	25.7613	23.612			87.9484	35.2232	34.2158	31.4619	28.8154	27.9056	25.3134	25.9669		87.0672	57.3267	32.1925	28.8689	28.0266	26.9424	26.5604	24.2055
initial slope		3.45997	4.22608	6.66038	7.84231	14.2603	15.6091	17.5449	21.3996		2.55289	6.53616	10.3028	13.903	17.0471	22.3186	22.5718	26.2844		2.74308	3.0903	6.7248	10.7979	12.9778	13.8309	16.4571	19.6953			3.68865	6.03182	8.06314	10.8476	12.9294	14.2224	16.982	19.8625		4.06028	7.39585	7.87175	10.1245	12.9138	14.8373	16.1017	19.0882
normalized initial slope		0	0.766108	3.20041	4.38234	10.8004	12.1492	14.0849	17.9396		0	3.98326	7.74994	11.3502	14.4942	19.7657	20.0189	23.7315		0	0.347218	3.98172	8.05483	10.2348	11.0879	13.714	16.9523			0	2.34317	4.3745	7.15894	9.2408	10.5337	13.2933	16.1738		0	3.33557	3.81147	6.06427	8.85351	10.777	12.0414	15.0279
RAW DATA
		Concentration (uM)									Concentration (uM)									Concentration (uM)										Concentration (uM)									Concentration (uM)
		Mn									Mn									Mn										Mn									Mn
		0	35	50	125	250	325	500	750		0	35	50	125	250	325	500	750		0	35	50	125	250	325	500	750			0	35	50	125	250	325	500	750		0	35	50	125	250	325	500	750
		4618	4626	4591	4667	4466	4600	4598	4824		5260	5069	5128	5002	4900	5131	5074	4843		4321	4247	4187	4279	4280	4200	4143	4136			4501	4455	4225	4456	4118	4451	4320	4434		5275	3629	4984	4884	4936	4880	4894	4932
		4592	4563	4459	4432	4433	4457	4655	4709		5332	5025	5069	4973	4946	4925	5041	4912		4370	4220	4189	4190	4196	4153	4123	4048			4434	4460	4301	4442	4065	4324	4286	4295		5230	3392	4955	4924	5007	4859	5040	4825
		4500	4371	4569	4447	4415	4421	4575	4762		5162	5042	4974	5094	4910	5045	4966	4872		4251	4131	4063	4137	4150	4111	4105	4110			4426	4347	4237	4399	4118	4390	4310	4338		5135	3568	4922	4833	4973	4821	4943	4827
		4509	4444	4514	4418	4326	4463	4520	4644		5113	5029	5006	4941	4944	4971	4998	4860		4247	4101	4098	4152	4115	4035	4057	3971			4303	4265	4189	4281	3979	4206	4248	4240		5147	3559	4871	4842	4825	4832	4893	4678
		4493	4445	4453	4413	4314	4371	4482	4622		5192	4948	4943	5000	4837	4946	5043	4943		4191	4069	4037	4046	4038	4012	4009	4025			4262	4314	4218	4252	4091	4278	4186	4271		5065	3431	4788	4845	4954	4782	4700	4667
		4477	4369	4314	4243	4280	4335	4286	4572		5130	4822	5024	4972	4791	4929	4892	4787		4215	3999	3997	4051	3965	3924	3922	3969			4391	4289	4129	4283	4039	4223	4179	4327		5125	3454	4747	4709	4867	4748	4720	4649
		4379	4268	4304	4274	4275	4272	4347	4540		5030	4840	4910	4797	4774	4965	4794	4891		4163	4081	4026	4117	4011	4025	3932	3954			4353	4278	4059	4255	4035	4246	4162	4212		4949	3453	4753	4644	4682	4676	4709	4544
		4212	4190	4194	4149	4188	4194	4268	4431		4937	4769	4799	4931	4923	4909	4849	4898		4140	3931	4021	3975	3919	4026	3937	3974			4304	4260	4166	4180	3941	4174	4154	4238		4969	3490	4780	4617	4670	4632	4700	4559
		4206	4165	4091	4172	4030	4218	4275	4388		4906	4863	4828	4770	4718	4847	4847	4862		4166	3948	3975	3977	3995	3973	3899	4057			4259	4124	4100	4067	3857	4157	4132	4143		4903	3434	4671	4608	4732	4523	4695	4516
		4215	4219	4028	4136	4168	4166	4208	4369		4905	4851	4813	4819	4836	4837	4929	4725		4087	4011	3882	3929	4009	3999	3935	3943			4163	4290	4111	4167	3944	4088	4087	4196		4890	3421	4664	4519	4635	4428	4690	4488
		4276	4223	4100	4104	4007	4150	4142	4297		4870	4866	4862	4862	4874	4953	4744	4840		4070	4014	3875	3935	3895	3924	3970	3958			4187	4166	4060	4204	3898	4107	4036	4159		4737	3447	4655	4508	4593	4493	4685	4519
		4167	4079	4026	4058	4103	4048	4206	4257		4969	4830	4775	4785	4807	4791	4790	4824		4106	3999	3913	3914	3869	3901	3886	3869			4155	4219	4110	4092	3962	4089	4083	4110		4782	3395	4549	4583	4620	4519	4573	4481
		4082	4035	4005	4055	3967	4135	4021	4179		4893	4858	4865	4852	4824	4842	4777	4786		3973	3955	3964	3960	3974	3922	3986	4027			4103	4184	4040	4150	3959	4082	4028	4108		4743	3379	4576	4523	4533	4451	4523	4442
		4068	3998	4023	4058	3939	4106	4054	4199		4947	4859	4851	4807	4802	4742	4796	4800		4069	3907	3922	3924	3886	3957	3884	3929			4217	4166	4005	4174	3982	4037	4068	4120		4766	3331	4430	4398	4510	4401	4487	4443
		4122	4024	3948	3989	3941	4087	4095	4171		4881	4751	4747	4777	4655	4784	4812	4682		4004	3958	3808	3884	3835	3858	4005	3898			4178	4276	4073	4083	3921	4121	4046	4149		4689	3395	4480	4344	4445	4428	4376	4426
		3989	4043	3996	4028	3954	4015	3995	4073		4802	4781	4874	4778	4745	4786	4783	4746		4028	3857	3852	3866	3885	3889	3870	3952			4118	4234	4015	4110	3906	3757	4039	4008		4702	3361	4478	4436	4473	4383	4381	4343
		4068	4011	3930	3922	3883	3975	4004	4078		4916	4790	4689	4770	4768	4751	4717	4701		4037	3906	3904	3813	3905	3858	3875	3869			4212	4156	3995	4090	3943	3759	4028	4105		4644	3322	4394	4352	4365	4414	4306	4370
		3983	4073	4005	3990	3948	4004	3996	4020		4841	4744	4823	4708	4689	4699	4949	4696		4011	3851	3923	3860	3866	3881	3895	3895			4116	4183	4044	4006	3915	3811	4028	4085		4583	3320	4318	4401	4408	4409	4357	4328
		3966	4063	3981	3987	3934	4012	3946	4096		4826	4795	4710	4788	4680	4784	4846	4648		3889	3896	3844	3883	3839	3878	3811	3918			4072	4160	3964	4028	3925	3818	3971	4053		4538	3426	4388	4421	4270	4365	4369	4339
		3941	3987	3979	4026	3904	3964	3996	4097		4765	4808	4770	4758	4724	4750	4835	4623		3973	3860	3869	3848	3812	3836	3799	3792			4147	4107	3934	3937	3819	3778	3983	3944		4550	3382	4315	4309	4318	4352	4286	4259
		3942	4046	3965	3920	3932	3913	3988	4089		4740	4801	4758	4771	4568	4809	4801	4638		3854	3877	3834	3823	3835	3896	3932	3914			4153	4135	4020	3973	3874	3703	3988	4057		4514	3390	4365	4308	4382	4284	4279	4229
		3920	3935	3912	3986	3900	3910	3897	4056		4737	4844	4804	4781	4641	4813	4741	4752		3967	3897	3810	3862	3847	3833	3910	3830			4066	4148	3941	4051	3884	3753	4028	3982		4483	3347	4252	4224	4271	4269	4255	4283
		3925	3921	3883	3953	3968	4014	4017	4040		4738	4778	4907	4794	4610	4785	4840	4661		3938	3863	3770	3832	3849	3848	3855	3801			4068	4081	4023	4036	3848	3747	3975	4001		4427	3319	4354	4291	4229	4243	4251	4249
		3811	4042	3961	4043	3900	3893	3986	4015		4598	4614	4807	4738	4649	4755	4868	4702		3970	3838	3807	3829	3832	3764	3890	3826			4066	4093	3923	4041	3931	3717	4019	3949		4497	3364	4234	4264	4281	4269	4265	4193
		3886	3955	3826	3962	4030	3908	3975	4097		4820	4710	4795	4837	4602	4795	4632	4756		3957	3791	3807	3836	3794	3760	3780	3804			4134	4041	3956	4046	3872	3789	3944	3961		4484	3395	4276	4289	4211	4240	4207	4210
		3858	4000	3889	3890	3932	4036	3902	4032		4825	4780	4756	4721	4661	4807	4731	4643		3948	3886	3796	3829	3827	3852	3787	3832			4082	4129	3921	3923	3856	3756	3997	3979		4497	3302	4250	4194	4245	4296	4221	4212
		3816	3922	3888	3897	3944	4016	3874	3961		4774	4654	4837	4682	4506	4816	4812	4698		3912	3830	3817	3846	3832	3881	3843	3821			4044	4076	3830	3994	3900	3771	3918	3914		4462	3349	4231	4265	4275	4245	4256	4215
		3918	3948	3834	3771	3918	3933	3889	4013		4769	4761	4864	4675	4545	4673	4742	4671		3869	3828	3854	3807	3832	3786	3844	3852			4058	4144	3969	3904	3836	3729	3919	3985		4444	3358	4287	4164	4192	4171	4218	4281
		3836	3930	3991	3918	3918	3931	3932	4043		4774	4746	4661	4714	4491	4783	4768	4677		3899	3884	3779	3825	3814	3816	3799	3852			4051	4047	3895	3928	3863	3797	3975	4004		4368	3264	4284	4175	4155	4233	4179	4233
		3741	3966	3828	3895	3898	3899	3778	3955		4667	4597	4801	4681	4603	4676	4738	4681		3885	3833	3779	3784	3841	3801	3772	3797			4026	4153	3950	3963	3879	3778	3890	3874		4417	3310	4220	4196	4212	4205	4174	4270
		3920	3934	3862	3895	3862	3933	3887	3875		4791	4727	4582	4625	4542	4687	4667	4559		3845	3809	3735	3828	3743	3728	3800	3775			4080	4156	3948	3964	3793	3749	3987	3895		4402	3253	4223	4155	4224	4221	4209	4129
		3919	3885	3855	3882	3819	3844	3810	4046		4722	4787	4669	4655	4475	4569	4687	4645		3843	3867	3817	3833	3740	3782	3885	3843			4028	4188	3914	3965	3890	3648	4007	3936		4386	3332	4212	4149	4203	4149	4170	4192
		3858	3904	3780	3849	3807	3896	3857	3905		4616	4726	4589	4661	4477	4616	4695	4605		3893	3768	3817	3761	3732	3793	3787	3825			4069	4114	3871	3898	3903	3702	3899	3837		4365	3311	4234	4234	4167	4121	4174	4221
		3846	3852	3858	3852	3840	3846	3772	3944		4739	4638	4773	4663	4515	4620	4610	4734		3861	3779	3807	3749	3754	3837	3814	3853			3973	4070	3944	3972	3865	3777	3928	3827		4293	3299	4136	4165	4205	4137	4082	4186
		3751	3842	3736	3809	3799	3814	3826	3900		4708	4656	4558	4685	4533	4733	4669	4658		3909	3789	3736	3787	3678	3742	3787	3797			4042	4171	3886	3912	3818	3785	3920	3956		4287	3264	4096	4174	4214	4141	4195	4176
		3857	3788	3752	3852	3857	3781	3818	3876		4705	4657	4635	4588	4487	4686	4569	4665		3863	3808	3796	3800	3772	3763	3795	3787			4044	4250	3963	3923	3813	3665	3925	3865		4347	3303	4182	4104	4248	4152	4038	4184
		3741	3944	3803	3871	3730	3827	3766	3932		4756	4722	4593	4525	4589	4648	4660	4624		3859	3780	3775	3743	3686	3738	3726	3773			4057	4107	3951	3886	3822	3774	3935	3815		4306	3254	4167	4254	4178	4006	4169	4175
		3843	3870	3809	3855	3736	3792	3802	3833		4649	4661	4666	4615	4601	4756	4715	4554		3842	3776	3730	3751	3748	3740	3740	3745			3912	4103	3866	3924	3821	3773	3936	3835		4264	3338	4094	4170	4097	4097	4050	4119
		3853	3901	3741	3845	3839	3715	3834	3965		4663	4707	4621	4640	4481	4645	4613	4640		3795	3828	3731	3779	3674	3745	3831	3831			3997	4176	3917	3894	3825	3760	3865	3894		4250	3289	4178	4119	4179	4096	4151	4112
		3720	3830	3761	3822	3782	3761	3849	3816		4753	4649	4655	4649	4488	4511	4663	4664		3917	3765	3708	3724	3714	3772	3783	3737			4022	4123	3884	3903	3750	3666	3889	3897		4316	3341	4121	4122	4141	4095	4173	4119
		3720	3839	3725	3855	3753	3860	3846	3907		4675	4721	4615	4518	4461	4546	4590	4524		3869	3766	3740	3812	3751	3813	3834	3809			3966	4136	3875	3935	3822	3712	3857	3858		4342	3352	4154	4169	4176	4152	4098	4019
		3744	3780	3741	3780	3666	3766	3744	3845		4683	4662	4609	4599	4477	4527	4621	4541		3822	3762	3723	3754	3778	3761	3768	3787			3997	4097	3837	3924	3850	3737	3914	3847		4232	3303	4199	4114	4119	4143	4127	4073
		3774	3769	3776	3800	3808	3826	3862	3801		4571	4633	4612	4445	4539	4516	4588	4541		3811	3781	3729	3748	3695	3730	3758	3772			3951	4057	3762	3798	3828	3754	3872	3881		4343	3268	4128	4126	4073	4101	4142	4062
		3791	3871	3764	3799	3743	3873	3788	3875		4713	4692	4642	4472	4411	4543	4585	4565		3817	3721	3728	3769	3706	3657	3826	3798			3979	4053	3879	3855	3811	3793	3869	3852		4238	3244	4153	4115	4163	4105	4105	4089
		3700	3896	3705	3778	3627	3744	3750	3856		4635	4632	4569	4543	4437	4592	4509	4496		3843	3757	3753	3719	3672	3703	3771	3728			3954	4093	3835	3918	3800	3651	3876	3835		4274	3314	4099	4110	4159	4135	4049	4080
		3708	3855	3707	3721	3748	3696	3762	3832		4605	4588	4500	4578	4497	4544	4626	4588		3808	3739	3716	3678	3766	3729	3673	3724			3990	4044	3800	3843	3809	3734	3881	3819		4169	3256	4105	4135	4061	4038	4142	4020
		3776	3768	3765	3762	3752	3726	3755	3805		4668	4582	4578	4509	4453	4624	4596	4593		3800	3749	3707	3726	3676	3707	3786	3725			4009	4078	3787	3863	3837	3774	3854	3835		4243	3264	4022	4010	4063	4036	4092	4115
		3691	3809	3672	3778	3684	3783	3719	3857		4587	4573	4577	4576	4432	4557	4503	4533		3868	3744	3651	3727	3720	3754	3724	3699			3924	4149	3851	3917	3866	3731	3858	3844		4229	3241	4141	4063	4110	4037	4052	4029
		3653	3809	3666	3777	3716	3742	3793	3793		4632	4539	4549	4463	4482	4576	4538	4536		3866	3807	3674	3702	3726	3756	3717	3786			3900	4086	3813	3781	3805	3705	3720	3841		4199	3268	4137	4077	4141	4058	4037	4092
		4747	4979	4956	4981	4949	5117	5035	5099		4395	4482	4605	4440	4410	4612	4479	4442		3416	3489	3374	3471	3394	3504	3450	3406			3610	3596	3555	3578	3674	3539	3529	3625		4034	3701	3937	4018	3912	3990	4033	4130
		4920	5089	4851	4965	4926	5002	4992	5009		4402	4493	4572	4487	4376	4511	4425	4360		3445	3394	3417	3422	3367	3406	3481	3397			3522	3607	3474	3555	3607	3577	3478	3549		4090	3590	3928	3957	3815	3994	4026	4072
		4896	5003	4922	4860	4887	4998	5001	5002		4394	4420	4601	4469	4234	4485	4457	4381		3383	3405	3339	3465	3367	3451	3461	3378			3511	3588	3510	3556	3672	3489	3491	3508		4119	3519	3836	4003	3890	3939	3908	4044
		4731	5056	4877	4995	5067	5102	4972	5014		4375	4399	4519	4450	4355	4479	4429	4376		3424	3469	3373	3402	3339	3399	3390	3381			3558	3549	3477	3556	3526	3529	3544	3507		4088	3638	3847	3838	3870	3958	3974	4002
		4794	5029	4904	4956	4900	5020	5011	5067		4332	4361	4543	4366	4228	4441	4344	4416		3432	3442	3347	3387	3274	3415	3423	3304			3526	3566	3406	3563	3574	3494	3465	3504		4049	3528	3884	3896	3866	3962	3988	4068
		4887	4998	5010	4985	4926	4987	4973	4992		4265	4452	4552	4377	4195	4421	4327	4238		3404	3406	3328	3300	3287	3275	3464	3356			3502	3489	3487	3522	3553	3497	3594	3509		4029	3572	3867	3873	3900	3912	3871	3971
		4877	4993	4823	4937	4988	4956	4993	5038		4385	4366	4433	4341	4206	4400	4434	4335		3472	3345	3352	3341	3310	3359	3428	3402			3486	3610	3469	3504	3605	3416	3459	3473		3964	3513	3831	3922	3784	3906	3935	4059
		4798	4979	4758	4891	4914	5014	4834	4995		4312	4401	4465	4364	4244	4366	4313	4351		3395	3359	3308	3345	3288	3357	3405	3349			3509	3626	3515	3523	3500	3463	3556	3450		4033	3550	3848	3862	3871	3940	3921	4052
		4699	4999	4950	4999	4968	4877	4922	5044		4303	4335	4491	4299	4318	4360	4359	4401		3394	3395	3353	3354	3294	3385	3423	3290			3473	3595	3440	3401	3520	3460	3462	3493		4014	3467	3794	3913	3847	3863	3889	3943
		4675	4930	4785	4897	4928	4961	4842	5052		4327	4332	4401	4331	4306	4458	4329	4361		3331	3347	3298	3347	3310	3315	3337	3375			3481	3521	3431	3553	3575	3456	3504	3483		3997	3575	3834	3854	3812	3885	3883	3956
		4906	4988	4765	4971	4823	5035	4879	5075		4289	4324	4486	4386	4196	4306	4373	4384		3321	3385	3266	3377	3331	3346	3334	3329			3426	3518	3435	3512	3529	3463	3532	3446		4003	3530	3773	3857	3825	3834	3934	4020
		4761	5002	4729	4852	4962	4786	4897	5082		4324	4423	4428	4348	4325	4390	4386	4306		3378	3357	3333	3295	3328	3375	3460	3266			3530	3558	3458	3546	3552	3489	3506	3444		3994	3479	3832	3960	3877	3921	3917	3944
		4663	4856	4876	4889	4774	4927	4871	5014		4322	4382	4486	4343	4179	4496	4303	4281		3343	3280	3344	3325	3336	3340	3391	3326			3492	3591	3432	3456	3437	3447	3493	3405		3931	3495	3820	3905	3890	3903	3886	3996
		4716	5046	4747	4854	4949	4891	4842	4819		4312	4331	4431	4369	4236	4374	4337	4394		3295	3332	3360	3392	3310	3352	3465	3227			3438	3568	3493	3486	3517	3467	3427	3404		3920	3492	3791	3850	3866	3908	3913	3974
		4856	4935	4825	4868	4742	4888	4763	4919		4359	4371	4432	4347	4328	4434	4419	4268		3374	3447	3261	3410	3350	3372	3380	3331			3477	3528	3468	3384	3497	3416	3459	3535		3991	3512	3824	3933	3844	3898	3850	3950
		4866	4862	4841	4867	4787	4861	4901	4903		4242	4256	4460	4333	4279	4330	4249	4311		3364	3344	3297	3289	3365	3396	3374	3313			3461	3549	3341	3487	3521	3485	3479	3480		3995	3427	3887	3904	3855	3946	3823	3974
		4791	4919	4822	4858	4781	4844	4837	4951		4197	4384	4502	4315	4247	4337	4237	4381		3346	3342	3276	3375	3231	3276	3382	3281			3458	3486	3513	3450	3490	3393	3488	3539		3993	3496	3854	3939	3832	3841	3877	3928
		4654	4936	4776	4803	4842	4895	4879	5021		4181	4450	4215	4338	4189	4351	4231	4256		3303	3377	3249	3319	3283	3328	3399	3298			3453	3562	3447	3429	3466	3354	3465	3557		3961	3491	3797	3862	3778	3877	3843	3991
		4738	4581	4818	4834	4737	4769	4882	5068		4289	4366	4515	4283	4214	4310	4300	4304		3340	3360	3276	3288	3264	3264	3383	3267			3446	3532	3392	3374	3505	3384	3498	3432		4038	3459	3860	3935	3822	3912	3826	3952
		4629	4641	4822	4889	4825	4895	4849	4989		4173	4456	4423	4311	4246	4400	4327	4359		3345	3322	3292	3258	3287	3318	3366	3306			3439	3658	3411	3420	3429	3425	3412	3426		3981	3485	3843	3817	3762	3874	3898	3977
		4801	2601	2495	2321	2291	2163	2112	2075		4614	2036	1929	1825	1773	1702	1707	1679		3725	2068	1932	1861	1743	1724	1684	1581			3866	2230	2022	1961	1827	1749	1719	1678		4249	2806	1869	1792	1676	1631	1558	1521
		4871	2625	2445	2276	2249	2123	2059	2047		4624	1991	1905	1826	1727	1711	1654	1580		3759	2025	1914	1844	1737	1635	1642	1567			3875	2240	2002	1888	1815	1695	1675	1629		4361	2798	1870	1777	1652	1596	1506	1479
		4912	2569	2391	2254	2165	2085	2042	1977		4836	1930	1878	1795	1698	1642	1599	1551		3802	2013	1865	1792	1718	1631	1654	1519			3861	2157	1979	1858	1763	1706	1651	1585		4311	2775	1861	1708	1604	1575	1510	1451
		4935	2542	2376	2262	2227	2105	2034	1974		4664	1914	1821	1784	1648	1645	1647	1514		3762	2009	1872	1762	1675	1610	1569	1478			3871	2122	1953	1836	1763	1662	1609	1523		4295	2757	1804	1728	1604	1558	1456	1402
		4649	2586	2401	2237	2129	2044	1947	1948		4665	1942	1892	1784	1631	1590	1559	1458		3720	2009	1828	1753	1631	1561	1574	1458			3944	2132	1977	1841	1740	1660	1613	1487		4265	2737	1796	1716	1541	1548	1427	1419
		4767	2490	2395	2217	2151	2006	1965	1891		4598	1950	1861	1761	1609	1525	1496	1425		3784	1971	1835	1730	1642	1572	1544	1479			3852	2091	1966	1815	1717	1579	1569	1459		4229	2666	1801	1699	1545	1501	1421	1377
		4899	2653	2384	2246	2130	1992	1892	1871		4644	1941	1794	1739	1584	1522	1472	1371		3790	1985	1859	1698	1602	1579	1529	1417			3838	2111	1955	1829	1731	1583	1566	1460		4327	2653	1795	1682	1525	1469	1398	1333
		4776	2530	2320	2231	2066	1979	1914	1815		4543	1914	1821	1692	1532	1537	1441	1356		3728	1958	1825	1742	1606	1549	1477	1401			3813	2097	1919	1775	1714	1546	1554	1459		4232	2627	1776	1641	1518	1487	1360	1326
		4844	2498	2292	2203	2074	1941	1838	1782		4554	1892	1775	1679	1529	1485	1390	1308		3794	1954	1831	1729	1600	1503	1508	1396			3851	2077	1958	1791	1683	1549	1522	1409		4249	2667	1779	1645	1514	1460	1361	1314
		4627	2546	2293	2179	2028	1922	1789	1746		4530	1883	1799	1646	1497	1463	1422	1321		3829	1954	1820	1691	1590	1515	1496	1379			3843	2104	1925	1747	1617	1508	1527	1388		4156	2579	1758	1684	1498	1432	1373	1300
		4529	2515	2294	2155	2012	1886	1827	1685		4720	1916	1773	1676	1496	1453	1391	1246		3758	1962	1793	1709	1549	1485	1497	1365			3840	2030	1890	1703	1648	1531	1489	1366		4175	2599	1740	1635	1507	1419	1337	1277
		4705	2513	2240	2120	1901	1831	1790	1675		4618	1900	1770	1615	1486	1418	1375	1225		3698	1921	1791	1690	1568	1508	1456	1335			3774	2070	1929	1736	1637	1513	1467	1358		4198	2610	1774	1621	1481	1431	1339	1254
		4612	2517	2255	2104	1967	1844	1714	1680		4693	1885	1770	1631	1434	1372	1340	1243		3677	1950	1815	1683	1528	1463	1414	1310			3868	2081	1890	1731	1624	1493	1461	1336		4193	2587	1726	1611	1437	1420	1309	1235
		4612	2483	2268	2111	1945	1787	1701	1629		4487	1878	1734	1618	1444	1387	1329	1170		3778	1943	1793	1670	1507	1447	1409	1287			3753	2067	1853	1725	1639	1497	1407	1320		4169	2592	1735	1642	1488	1376	1293	1207
		4718	2427	2223	2083	1912	1808	1666	1603		4565	1854	1740	1609	1446	1357	1283	1138		3698	1942	1765	1634	1515	1431	1382	1249			3765	2025	1866	1742	1594	1473	1417	1328		4162	2631	1773	1628	1455	1388	1267	1223
		4584	2468	2234	2097	1921	1792	1671	1589		4546	1855	1719	1595	1427	1326	1254	1127		3689	1938	1763	1639	1521	1420	1347	1250			3826	2114	1836	1685	1599	1465	1394	1324		4227	2635	1748	1616	1426	1367	1289	1181
		4731	2479	2253	2091	1900	1751	1678	1614		4497	1841	1685	1533	1393	1334	1265	1104		3749	1916	1746	1627	1460	1426	1375	1247			3769	2026	1843	1673	1582	1456	1405	1286		4145	2609	1724	1570	1397	1343	1244	1184
		4714	2452	2242	2020	1870	1781	1626	1547		4734	1855	1739	1551	1378	1278	1219	1104		3701	1932	1756	1601	1464	1386	1355	1223			3818	2016	1837	1716	1536	1406	1394	1290		4152	2534	1659	1559	1392	1350	1219	1170
		4664	2423	2224	2008	1893	1708	1607	1521		4630	1822	1703	1549	1363	1249	1216	1086		3637	1904	1774	1618	1450	1398	1327	1189			3824	2064	1841	1664	1563	1429	1351	1268		4168	2551	1716	1609	1400	1348	1219	1146
		4607	2441	2193	2010	1856	1714	1628	1492		4603	1826	1676	1543	1342	1251	1188	1083		3600	1910	1731	1602	1420	1384	1303	1197			3811	2002	1844	1686	1545	1400	1346	1282		4118	2544	1704	1575	1389	1329	1174	1134
		4621	2418	2204	2028	1870	1695	1555	1501		4558	1788	1662	1505	1348	1214	1159	1037		3652	1906	1698	1592	1444	1334	1303	1194			3739	2033	1802	1669	1521	1381	1331	1211		4140	2554	1728	1549	1375	1304	1217	1123
		4754	2429	2220	2022	1870	1726	1578	1480		4449	1818	1649	1485	1350	1179	1157	1018		3705	1909	1742	1572	1432	1323	1292	1173			3760	2000	1823	1617	1481	1399	1311	1216		4074	2513	1672	1540	1393	1259	1179	1108
		4614	2397	2162	1997	1801	1656	1585	1475		4425	1820	1613	1488	1305	1195	1142	998		3593	1907	1697	1581	1427	1308	1262	1138			3785	1978	1797	1643	1503	1372	1284	1194		4107	2565	1668	1550	1379	1272	1184	1098
		4634	2469	2216	2025	1798	1657	1551	1431		4458	1808	1629	1469	1313	1174	1129	996		3614	1937	1733	1564	1420	1317	1262	1133			3674	2050	1775	1600	1485	1356	1275	1174		4112	2507	1663	1524	1352	1263	1165	1082
		4608	2392	2230	2046	1821	1623	1539	1434		4624	1800	1629	1460	1262	1152	1105	977		3636	1909	1703	1570	1382	1330	1264	1137			3688	1931	1769	1585	1448	1341	1292	1187		4094	2507	1641	1527	1342	1251	1159	1070
		4661	2456	2198	1977	1788	1613	1540	1421		4497	1782	1609	1453	1283	1169	1077	961		3606	1887	1710	1562	1362	1319	1247	1126			3779	2027	1779	1636	1456	1347	1252	1189		4107	2540	1640	1515	1332	1224	1137	1056
		4656	2457	2188	1936	1810	1629	1516	1414		4534	1764	1634	1439	1256	1145	1059	952		3623	1869	1665	1549	1424	1308	1227	1111			3775	2013	1786	1592	1482	1320	1242	1174		4094	2490	1664	1493	1321	1250	1123	1031
		4617	2400	2185	1953	1780	1630	1522	1408		4452	1745	1623	1423	1251	1123	1048	953		3580	1851	1679	1526	1375	1280	1220	1096			3685	2031	1762	1619	1449	1343	1234	1163		4078	2499	1657	1483	1323	1200	1146	1016
		4666	2426	2130	1970	1761	1605	1472	1391		4581	1744	1623	1439	1257	1124	1027	936		3641	1878	1677	1526	1343	1281	1209	1084			3705	1964	1769	1592	1409	1291	1227	1127		4091	2482	1639	1469	1295	1202	1095	1036
		4703	2378	2166	2005	1752	1565	1470	1424		4554	1760	1608	1376	1251	1089	1024	908		3715	1864	1696	1510	1358	1247	1165	1083			3709	2004	1752	1552	1428	1304	1216	1140		4074	2494	1605	1479	1311	1178	1096	1017
		4629	2358	2151	1905	1716	1548	1469	1366		4485	1753	1585	1441	1244	1085	1004	878		3629	1849	1690	1522	1361	1254	1215	1084			3718	1998	1755	1554	1422	1297	1225	1137		4032	2458	1622	1462	1289	1197	1064	1009
		4591	2378	2187	1918	1702	1548	1478	1358		4440	1757	1621	1403	1227	1073	981	869		3703	1872	1663	1543	1308	1210	1198	1027			3716	1972	1757	1556	1403	1262	1213	1112		4117	2453	1621	1484	1267	1179	1103	973
		4684	2396	2098	1934	1732	1558	1416	1367		4586	1752	1564	1427	1190	1054	976	846		3654	1866	1671	1539	1335	1233	1181	1066			3695	1998	1759	1583	1408	1281	1180	1134		4100	2514	1632	1466	1278	1181	1089	989
		4570	2367	2113	1940	1737	1554	1436	1318		4477	1685	1547	1386	1175	1037	959	853		3648	1881	1640	1493	1313	1186	1169	1060			3736	1945	1736	1537	1382	1274	1173	1106		4005	2438	1602	1459	1237	1174	1066	987
		4614	2344	2141	1902	1760	1538	1415	1336		4472	1743	1603	1383	1186	1044	979	846		3572	1844	1645	1489	1321	1222	1144	1042			3674	1968	1742	1578	1393	1253	1159	1082		4010	2451	1558	1437	1265	1157	1062	963
		4694	2353	2107	1924	1667	1544	1415	1300		4493	1706	1552	1393	1176	1026	954	830		3644	1850	1648	1511	1296	1212	1131	1017			3733	2009	1721	1515	1353	1231	1159	1068		4072	2434	1612	1422	1237	1145	1036	969
		4624	2331	2054	1897	1662	1516	1401	1318		4458	1731	1572	1348	1157	1030	924	818		3581	1878	1634	1494	1311	1196	1143	1008			3680	1944	1726	1518	1353	1246	1157	1099		4093	2428	1594	1420	1249	1141	1043	963
		4709	2314	2075	1885	1691	1516	1377	1274		4368	1728	1537	1360	1166	1025	927	801		3634	1867	1649	1478	1284	1189	1141	1021			3685	1963	1704	1499	1344	1223	1132	1093		4043	2460	1599	1404	1252	1157	1027	930
		4658	2429	2089	1916	1679	1534	1370	1279		4508	1699	1555	1364	1159	1004	922	793		3561	1838	1620	1453	1283	1188	1119	994			3655	1944	1707	1520	1340	1248	1144	1062		4095	2414	1571	1386	1241	1148	1015	943
		4694	2318	2113	1888	1679	1504	1336	1287		4499	1708	1549	1319	1147	981	914	798		3627	1832	1614	1489	1272	1200	1116	988			3663	1970	1688	1512	1352	1221	1114	1059		4069	2409	1562	1425	1215	1124	1035	926
		4583	2372	2098	1891	1690	1505	1359	1278		4558	1680	1541	1334	1133	986	891	772		3638	1799	1651	1463	1249	1185	1084	1003			3642	1943	1705	1489	1325	1220	1110	1055		4045	2453	1581	1432	1223	1125	1007	939
		4561	2374	2086	1870	1624	1462	1346	1275		4512	1718	1532	1304	1106	962	888	761		3628	1786	1616	1458	1293	1160	1089	965			3699	1987	1711	1518	1351	1216	1119	1018		4140	2458	1547	1382	1229	1091	1007	904
		4644	2370	2099	1907	1655	1468	1360	1240		4458	1704	1512	1301	1113	968	887	746		3648	1792	1634	1455	1264	1172	1106	964			3680	1976	1715	1489	1360	1184	1125	1047		4070	2432	1589	1394	1201	1084	1007	915
		4583	2392	2072	1856	1628	1492	1335	1255		4512	1715	1527	1304	1104	974	868	762		3583	1817	1573	1466	1283	1151	1076	954			3807	1961	1696	1515	1335	1191	1105	1047		4013	2378	1571	1392	1208	1110	1021	899
		4711	2337	2108	1855	1623	1443	1311	1256		4500	1678	1503	1300	1085	978	880	747		3588	1818	1577	1450	1245	1129	1081	930			3707	1950	1722	1519	1290	1191	1095	1053		4076	2402	1567	1394	1184	1084	973	893
		4678	2303	2035	1810	1598	1449	1328	1230		4384	1673	1504	1299	1051	967	885	735		3607	1777	1618	1419	1236	1137	1077	945			3611	1927	1670	1493	1318	1190	1088	1008		4012	2433	1578	1385	1178	1107	967	895
		4591	2340	2070	1871	1645	1407	1321	1215		4461	1694	1521	1303	1068	943	855	722		3609	1772	1570	1417	1242	1104	1084	941			3666	1908	1677	1466	1292	1169	1058	1015		3987	2377	1562	1378	1196	1079	981	894
		4571	2374	2047	1823	1623	1421	1321	1234		4458	1650	1534	1297	1071	941	842	710		3596	1826	1602	1442	1239	1129	1068	937			3681	1933	1637	1476	1304	1158	1075	980		4039	2378	1582	1359	1183	1078	990	903
		4657	2315	2051	1790	1605	1410	1265	1186		4478	1664	1521	1318	1058	911	837	705		3627	1801	1574	1413	1225	1138	1059	939			3719	1940	1672	1502	1295	1172	1068	996		4001	2381	1553	1350	1160	1075	953	887
		4609	2322	1997	1860	1609	1444	1255	1203		4424	1682	1514	1300	1074	907	846	695		3601	1834	1583	1411	1191	1130	1074	927			3709	1951	1664	1412	1304	1144	1059	994		4045	2422	1531	1381	1151	1070	948	891
		4715	2278	2044	1813	1568	1422	1265	1199		4432	1695	1486	1252	1062	893	824	687		3557	1803	1604	1395	1209	1119	1074	930			3658	1951	1653	1444	1276	1149	1093	995		4049	2397	1540	1361	1175	1040	964	854
		4615	2323	2010	1872	1567	1386	1254	1173		4426	1673	1479	1278	1057	893	832	683		3659	1786	1568	1430	1210	1103	1045	930			3680	1941	1661	1463	1285	1144	1069	970		4030	2414	1545	1384	1154	1059	925	860
		4628	2296	2040	1815	1556	1396	1277	1184		4461	1660	1478	1254	1033	897	815	675		3647	1811	1616	1442	1216	1103	1031	906			3767	1879	1705	1431	1293	1135	1052	981		4066	2430	1536	1350	1153	1061	955	861
		4652	2327	2041	1816	1539	1374	1253	1178		4318	1651	1468	1255	1026	876	819	674		3698	1827	1602	1443	1204	1107	1027	891			3721	1919	1625	1447	1272	1132	1052	960		4051	2400	1539	1344	1161	1024	935	847
		4614	2343	1990	1771	1538	1360	1238	1165		4438	1647	1473	1217	1024	877	796	680		3575	1788	1591	1381	1205	1114	1024	895			3705	1917	1630	1419	1250	1125	1043	963		4065	2402	1534	1354	1130	1042	947	852
		4667	2307	2036	1806	1562	1358	1243	1137		4416	1669	1469	1243	1008	888	806	662		3656	1818	1587	1378	1198	1085	1013	892			3697	1934	1636	1443	1224	1113	1031	956		4000	2409	1534	1339	1118	1033	924	828
		4641	2257	2042	1756	1548	1362	1200	1141		4427	1645	1455	1220	999	862	768	637		3630	1825	1565	1370	1154	1070	1008	891			3737	1951	1627	1404	1231	1131	1027	944		3997	2440	1520	1320	1128	1035	945	807
		4719	2285	2052	1791	1528	1358	1234	1161		4470	1654	1457	1229	993	858	762	664		3615	1774	1565	1396	1183	1061	991	890			3704	1898	1663	1419	1229	1133	1045	968		3950	2421	1517	1316	1133	1001	914	823
		4483	2284	1993	1759	1493	1359	1218	1127		4435	1639	1476	1228	1003	846	774	634		3623	1774	1574	1408	1179	1073	978	870			3706	1928	1670	1404	1215	1106	1040	936		4060	2388	1516	1329	1128	1032	927	827
		4562	2270	2031	1763	1504	1353	1186	1135		4362	1681	1436	1238	983	863	768	637		3611	1804	1539	1362	1171	1069	998	884			3671	1924	1640	1425	1234	1116	1024	929		3977	2393	1496	1348	1092	1014	896	819
		4624	2272	1990	1792	1503	1330	1208	1112		4305	1634	1445	1229	982	837	769	629		3574	1793	1544	1390	1189	1080	968	871			3702	1890	1598	1431	1225	1101	1006	917		4063	2442	1509	1320	1102	1019	904	806
		4707	2295	2051	1745	1506	1343	1213	1125		4310	1669	1398	1194	953	817	749	626		3618	1765	1558	1391	1176	1067	979	865			3688	1941	1622	1404	1215	1105	1022	925		4059	2398	1520	1272	1127	999	890	792
		4664	2259	2009	1749	1539	1356	1193	1089		4490	1605	1420	1184	953	820	732	623		3579	1783	1539	1363	1171	1063	973	866			3700	1910	1615	1395	1208	1071	1007	907		4035	2377	1467	1332	1096	999	905	809
		4529	2268	2018	1763	1487	1318	1176	1123		4399	1616	1438	1196	962	808	739	617		3642	1777	1533	1336	1154	1073	978	854			3752	1948	1636	1412	1209	1062	969	915		3963	2405	1477	1310	1098	971	896	798
		4631	2273	1969	1724	1506	1306	1156	1092		4371	1598	1453	1183	964	802	738	612		3613	1782	1535	1332	1150	1033	984	833			3695	1867	1595	1372	1195	1069	987	900		4096	2414	1488	1293	1096	980	893	791
		4551	2272	1981	1718	1501	1317	1171	1070		4392	1622	1425	1201	932	807	738	620		3579	1751	1537	1345	1162	1052	994	831			3755	1888	1574	1376	1191	1067	965	889		4016	2422	1497	1299	1101	993	883	798
		4540	2254	1999	1706	1464	1308	1184	1082		4424	1617	1396	1180	957	790	718	600		3602	1728	1573	1374	1129	1017	940	855			3633	1943	1608	1372	1197	1053	974	889		3980	2393	1483	1278	1058	978	872	788
		4565	2264	2004	1731	1463	1296	1135	1068		4433	1635	1406	1161	932	799	710	597		3588	1759	1528	1314	1151	1047	955	849			3646	1909	1585	1354	1191	1052	957	892		3979	2422	1491	1292	1082	990	868	765
		4588	2268	1974	1678	1462	1314	1160	1073		4460	1616	1398	1140	941	791	709	590		3554	1794	1554	1325	1136	1014	952	823			3657	1874	1596	1372	1184	1068	982	878		4010	2386	1492	1270	1087	983	875	761
		4690	2229	1940	1690	1490	1320	1146	1065		4485	1582	1411	1142	918	780	706	574		3601	1752	1519	1326	1120	1000	947	805			3697	1895	1582	1373	1141	1054	950	889		4055	2396	1468	1311	1068	951	849	796
		4721	2240	1982	1725	1497	1327	1108	1074		4435	1613	1412	1161	889	767	698	576		3561	1778	1538	1323	1133	1031	929	816			3732	1922	1575	1375	1140	1014	964	885		4007	2422	1467	1299	1090	956	853	759
		4667	2252	1977	1713	1472	1272	1139	1041		4402	1634	1428	1178	916	783	709	581		3610	1758	1532	1329	1143	1000	928	826			3676	1904	1600	1374	1175	1046	970	893		4007	2366	1425	1247	1064	945	840	745
		4748	2270	1981	1736	1465	1267	1111	1052		4343	1600	1392	1150	924	783	679	562		3604	1742	1534	1329	1115	1018	949	809			3617	1901	1601	1341	1166	1038	927	871		4039	2365	1464	1272	1057	968	847	748
		4796	2268	1920	1727	1462	1278	1143	1042		4398	1583	1377	1125	909	752	697	561		3589	1754	1509	1331	1084	996	941	802			3754	1899	1608	1349	1142	1026	928	863		3949	2365	1434	1245	1070	956	843	747
		4576	2272	1923	1672	1440	1261	1120	1053		4298	1597	1390	1129	902	756	692	557		3577	1780	1515	1330	1102	1007	932	795			3546	1909	1573	1345	1153	986	932	846		4016	2357	1458	1255	1045	916	827	753
		4631	2210	1917	1696	1435	1229	1103	1048		4427	1554	1385	1109	916	738	678	571		3594	1717	1492	1332	1088	997	924	803			3745	1879	1561	1347	1184	1022	931	847		4023	2379	1452	1245	1037	933	823	738
		4698	2243	1948	1715	1402	1232	1083	1046		4399	1601	1386	1112	895	745	666	569		3539	1744	1516	1329	1084	1005	908	786			3678	1896	1596	1326	1160	1051	933	856		4027	2352	1418	1230	1037	933	848	745
		4551	2240	1916	1663	1415	1280	1102	1034		4411	1547	1381	1148	896	740	681	551		3572	1758	1511	1312	1058	993	889	794			3670	1909	1509	1319	1153	1039	922	844		3978	2369	1428	1216	1034	916	834	725
		4594	2273	1972	1671	1419	1237	1097	1007		4367	1598	1383	1123	895	735	685	568		3561	1731	1509	1303	1076	992	902	809			3692	1906	1541	1351	1157	1007	932	848		3978	2336	1423	1237	1038	925	813	740
		4636	2214	1989	1702	1390	1246	1096	1007		4376	1556	1393	1142	866	722	663	542		3605	1752	1461	1338	1079	992	892	825			3716	1894	1531	1351	1130	1026	918	837		4040	2352	1421	1240	1050	899	811	726
		4610	968	791	707	628	594	524	514		4626	341	268	249	239	205	198	181		3359	808	680	603	544	515	477	440			3545	793	701	632	588	555	488	496		3797	1580	632	543	510	465	417	409
		4635	969	768	684	612	583	505	499		4634	340	254	222	211	185	187	164		3442	799	673	584	522	503	473	412			3495	833	698	616	583	529	489	481		3837	1580	623	536	492	456	415	389
		4556	949	774	690	600	563	491	474		4450	338	261	222	192	171	167	159		3417	795	659	581	537	496	455	418			3573	807	704	623	557	527	454	463		3833	1575	619	539	492	444	410	388
		4625	949	763	683	604	558	481	474		4562	330	258	209	185	168	162	145		3411	791	655	564	525	480	447	406			3505	793	714	605	541	503	459	458		3898	1566	594	532	477	445	394	388
		4558	964	776	664	589	560	487	468		4534	332	240	206	180	167	156	137		3422	796	654	573	501	478	435	397			3453	783	693	606	546	498	462	450		3828	1584	590	520	477	441	402	381
		4391	945	800	683	592	536	469	461		4456	333	249	201	179	151	154	134		3425	797	653	568	499	480	440	398			3509	800	717	596	534	491	439	442		3822	1590	621	515	475	443	399	375
		4547	956	779	677	576	534	462	442		4482	325	249	197	173	152	143	126		3368	775	634	563	510	462	427	388			3482	800	701	601	530	493	435	432		3820	1582	613	522	473	430	385	376
		4541	968	770	676	567	535	465	447		4490	331	250	193	180	151	142	129		3372	802	638	565	492	473	432	381			3537	794	708	616	517	500	436	424		3864	1613	599	509	466	429	387	373
		4591	970	789	660	578	536	453	450		4556	328	251	190	181	139	141	120		3508	784	651	556	499	466	417	382			3476	785	680	602	525	483	437	416		3863	1623	591	520	470	424	390	359
		4551	956	791	667	581	518	457	433		4478	322	248	195	173	139	139	119		3378	797	669	571	494	460	429	382			3516	799	681	602	537	484	421	417		3892	1622	613	514	471	425	378	366
		4530	946	773	648	568	528	434	429		4501	329	249	187	173	143	134	115		3362	795	667	576	499	456	423	370			3408	789	685	594	523	473	424	423		3797	1604	602	513	463	430	400	358
[truncated: 24 more columns]

## Sheet: Fig8E
Elen T224A
Mn
	Mn2+ (μM)	Vi (ΔF.min-1)
	0	0	0	0	0	0
	35	0.766108	3.98326	0.347218	2.34317	3.33557
	50	3.20041	7.74994	3.98172	4.3745	3.81147
	125	4.38234	11.3501	8.05483	7.15894	6.06427
	250	10.8004	14.4942	10.2348	9.2408	8.85351
	325	12.1492	19.7657	11.0879	10.5337	10.777
	500	14.0849	20.0189	13.714	13.2933	12.0414
	750	17.9396	23.7315	16.9522	16.1738	15.0279
			Km=290 uM
			Vmax = 24

## Sheet: Fig8F
Elen-T224A
lipid to protein ratio 50
Manganese transport
in presence of Mg
NORMALIZED DATA
		Concentration Mn/Mg (uM/mM)															Condition
																	Mean	SEM	N
	Time (min)	0/0	125/0	125/2	0/0	125/0	125/2	0/0	125/0	125/2	0/0	125/0	125/2			Time (min)	No substrate			125 μM Mn 2+			125 μM Mn 2+ / 2 mM Mg2+
	-6.18453	129.815	260.58	252.106	126.089	256.154	230.614	117.255	302.337	270.424	108.91	319.184	309.508			-6.18453	120.517	4.68027	4	284.564	15.5371	4	265.663	16.7264	4
	-6.11715	130.678	257.167	252.808	125.431	260	229.94	118.426	302.998	263.94	109.044	314.502	300.224			-6.11715	120.895	4.67992	4	283.667	14.6822	4	261.728	14.6539	4
	-6.05075	127.721	255.119	246.646	125.472	255.812	227.695	115.086	301.778	266.983	108.604	313.545	306.152			-6.05075	119.221	4.48272	4	281.564	15.2585	4	261.869	16.7997	4
	-5.98428	130.308	252.986	242.278	123.665	251.88	224.177	117.044	301.423	266.983	107.285	310.322	286.689			-5.98428	119.575	4.91066	4	279.153	15.5348	4	255.031	13.7226	4
	-5.91737	127.598	250.597	238.534	122.638	250.342	221.856	112.457	299.441	265.087	107.4	302.669	286.018			-5.91737	117.523	4.61704	4	275.762	14.6177	4	252.874	14.1875	4
	-5.85097	125.503	252.304	235.647	123.213	244.017	220.659	112.802	294.97	262.843	106.788	304.381	281.264			-5.85097	117.076	4.40443	4	273.918	15.0897	4	250.103	13.5685	4
	-5.78428	126.324	245.99	234.321	118.694	242.393	222.455	112.054	293.902	263.242	104.532	297.13	277.74			-5.78428	115.401	4.65037	4	269.854	14.849	4	249.44	12.7416	4
	-5.71762	123.778	248.038	231.591	119.31	238.376	215.344	110.557	295.986	261.895	105.908	296.828	273.322			-5.71762	114.888	4.06187	4	269.807	15.4846	4	245.538	13.3719	4
	-5.65095	121.109	239.932	229.875	117.995	237.094	214.072	110.48	293.496	262.494	104.245	294.864	274.497			-5.65095	113.457	3.79555	4	266.346	16.0826	4	245.234	14.0273	4
	-5.5843	122.053	239.932	221.373	117.42	235.641	210.554	110.499	287.246	261.247	105.182	289.829	271.029			-5.5843	113.788	3.72374	4	263.162	14.6862	4	241.051	14.787	4
	-5.51763	122.752	246.587	214.665	115.9	236.154	210.329	109.597	290.498	261.696	102.83	291.692	272.707			-5.51763	112.769	4.26519	4	266.233	14.5134	4	239.849	15.9755	4
	-5.45068	120.164	239.164	216.771	114.215	232.137	209.955	107.409	287.348	256.658	105.411	282.377	268.792			-5.45068	111.8	3.36521	4	260.256	14.3145	4	238.044	14.5301	4
	-5.38428	120.246	234.215	215.055	114.133	226.41	207.26	107.14	286.941	258.254	103.69	283.233	270.134			-5.38428	111.302	3.6887	4	257.7	15.91	4	237.676	15.5827	4
	-5.3176	117.454	234.044	211.31	114.174	226.41	207.036	106.2	287.602	260.299	102.275	281.923	267.394			-5.3176	110.026	3.50112	4	257.495	15.8623	4	236.51	15.8731	4
	-5.25088	116.509	232.338	212.324	114.339	224.188	204.341	105.893	286.28	254.214	102.275	281.923	263.367			-5.25088	109.754	3.38492	4	256.182	16.2294	4	233.562	14.7754	4
	-5.18423	117.125	224.573	212.949	111.873	222.222	208.683	105.643	284.959	257.506	101.071	277.795	263.423			-5.18423	108.928	3.51663	4	252.387	16.8078	4	235.64	14.4095	4
	-5.1173	114.908	229.01	210.998	108.874	220.256	203.144	106.545	283.333	256.259	102.906	273.565	262.136			-5.1173	108.308	2.51929	4	251.541	15.7643	4	233.135	15.1804	4
	-5.0509	113.922	223.635	207.8	112.366	220.684	200.225	104.28	280.945	255.711	102.811	277.694	263.479			-5.0509	108.345	2.80515	4	250.739	16.5251	4	231.804	16.1974	4
	-4.98423	112.772	221.331	201.482	110.805	217.094	196.033	105.163	282.724	255.162	103.078	272.81	265.101			-4.98423	107.955	2.28955	4	248.49	17.0458	4	229.444	17.8675	4
	-4.91758	111.745	219.369	203.822	109.408	219.145	200.599	103.724	280.894	253.616	100.956	271.903	257.271			-4.91758	106.458	2.49015	4	247.828	16.5973	4	228.827	15.3992	4
	-4.85065	111.54	222.526	200.234	106.697	219.915	197.156	103.167	275.965	255.561	100.172	269.184	261.633			-4.85065	105.394	2.44435	4	246.897	14.8989	4	228.646	17.348	4
	-4.78423	110.637	219.027	203.978	107.477	216.239	198.877	103.205	282.927	261.696	101.128	272.759	255.928			-4.78423	105.612	2.13353	4	247.738	17.5138	4	230.12	16.6398	4
	-4.71757	108.008	216.638	201.014	106.286	216.667	191.542	102.975	274.746	253.666	100.497	272.205	259.899			-4.71757	104.442	1.67909	4	245.064	16.4116	4	226.53	17.6189	4
	-4.6509	112.32	220.222	200.546	107.354	207.949	191.317	103.148	276.423	255.86	102.218	267.976	254.53			-4.6509	106.26	2.30846	4	243.142	17.0495	4	225.563	17.2135	4
	-4.58423	108.747	216.382	197.816	107.436	216.496	188.323	104.395	278.303	254.364	101.816	268.933	255.034			-4.58423	105.599	1.55576	4	245.028	16.6165	4	223.884	17.8965	4
	-4.51758	107.762	214.42	199.064	105.629	210.256	188.398	101.977	284.299	253.466	100.535	267.573	254.027			-4.51758	103.976	1.65572	4	244.137	18.6932	4	223.739	17.4616	4
	-4.4509	109.076	214.59	199.376	106.122	210.171	186.452	101.555	275.813	244.09	99.5411	267.774	247.763			-4.4509	104.073	2.1623	4	242.087	17.253	4	219.42	15.5471	4
	-4.38423	108.255	215.529	196.022	104.725	212.65	190.269	102.495	273.476	248.828	99.9235	263.092	255.537			-4.38423	103.85	1.76584	4	241.186	15.7984	4	222.664	17.1376	4
	-4.31757	107.885	212.031	197.192	103.944	210.427	190.12	101.612	275.864	251.122	100.421	265.257	256.432			-4.31757	103.466	1.64485	4	240.895	17.2669	4	223.716	17.4491	4
	-4.2509	106.407	215.017	190.874	103.862	211.624	182.186	103.704	273.78	249.925	100.765	261.128	252.237			-4.2509	103.684	1.15349	4	240.387	15.8542	4	218.805	18.7246	4
	-4.18425	106.119	212.372	193.526	103.122	207.265	188.249	103.321	276.728	246.234	99.4837	263.595	248.602			-4.18425	103.011	1.36045	4	239.99	17.6553	4	219.153	16.3617	4
	-4.1175	105.626	214.932	191.966	103.328	208.803	185.704	102.418	272.409	245.835	98.0306	258.258	247.204			-4.1175	102.351	1.5904	4	238.6	15.7519	4	217.677	16.7035	4
	-4.05065	106.242	211.775	188.924	103.615	206.325	185.105	101.996	274.39	251.97	99.5029	259.919	246.085			-4.05065	102.839	1.41496	4	238.102	17.0679	4	218.021	17.9589	4
	-3.98423	105.216	209.727	187.988	103.081	203.419	186.228	99.8081	271.646	249.077	98.6233	266.918	261.242			-3.98423	101.682	1.50863	4	237.928	18.174	4	221.133	19.8045	4
	-3.91732	104.353	212.287	194.618	103.205	204.701	186.976	100.864	272.459	257.257	98.4321	258.56	246.7			-3.91732	101.713	1.31279	4	237.002	16.7734	4	221.388	17.8608	4
	-3.85092	105.01	204.949	188.066	103.287	202.393	186.153	101.305	271.392	254.165	98.8337	259.063	243.904			-3.85092	102.109	1.32849	4	234.449	17.9548	4	218.072	18.0028	4
	-3.78398	105.257	205.717	188.612	101.561	202.906	185.105	99.8273	277.337	250.125	98.5468	265.962	246.98			-3.78398	101.298	1.45695	4	237.98	19.5855	4	217.705	17.8355	4
	-3.71758	104.394	207.935	191.654	100.657	201.795	183.458	101.075	268.394	250.873	99.4837	260.524	249.497			-3.71758	101.403	1.05257	4	234.662	17.3235	4	218.87	18.1588	4
	-3.65092	104.394	204.863	188.924	101.972	202.65	183.234	98.714	273.526	247.781	96.9216	263.595	246.029			-3.65092	100.501	1.66652	4	236.159	18.8223	4	216.492	17.601	4
	-3.58425	102.793	203.754	190.25	100.534	201.709	183.308	100.921	274.289	247.631	98.4512	259.768	241.107			-3.58425	100.675	0.890218	4	234.88	18.8006	4	215.574	16.7382	4
	-3.51758	102.957	204.181	184.477	100.781	203.59	177.62	99.8656	276.27	248.529	98.6042	261.078	242.673			-3.51758	100.552	0.917459	4	236.28	18.9586	4	213.325	18.7254	4
	-3.45092	103.737	207.765	184.789	99.7124	196.496	181.287	101.612	273.374	249.077	98.2409	257.805	244.072			-3.45092	100.826	1.1908	4	233.86	18.7345	4	214.806	18.3836	4
	-3.38425	101.191	204.096	183.229	100.616	199.316	178.518	99.5969	276.931	253.666	99.0631	259.063	243.4			-3.38425	100.117	0.48166	4	234.852	19.5055	4	214.703	19.6672	4
	-3.31758	101.766	206.997	183.697	101.15	199.06	176.048	100.902	274.187	248.379	97.1893	259.164	241.779			-3.31758	100.252	1.0369	4	234.852	18.6979	4	212.476	18.9361	4
	-3.25065	102.957	206.143	184.321	98.8085	200.855	177.47	99.9424	272.053	250.873	96.979	258.912	246.644			-3.25065	99.6717	1.25372	4	234.491	18.1252	4	214.827	19.6591	4
	-3.18425	102.998	201.877	184.867	100.493	200.513	179.865	97.8887	266.717	251.471	97.782	258.862	244.855			-3.18425	99.7904	1.23935	4	231.992	17.8552	4	215.265	19.0692	4
	-3.11732	101.766	204.01	182.761	100.657	194.103	177.695	99.5393	273.628	247.282	97.6482	259.215	236.633			-3.11732	99.9027	0.878254	4	232.739	19.7716	4	211.093	17.9816	4
	-3.05092	100.986	200.683	182.917	99.4248	199.658	176.572	99.4434	265.447	249.426	99.3499	257.301	237.304			-3.05092	99.8009	0.395408	4	230.772	17.7473	4	211.555	18.5769	4
	-2.98425	100.452	200	181.825	100.452	198.803	178.743	98.2342	274.085	250.773	98.3556	256.344	242.897			-2.98425	99.3734	0.623135	4	232.308	19.3422	4	213.56	19.2891	4
	-2.10903	100.37	200.512	183.307	101.027	201.282	170.584	103.148	269.106	255.162	100.994	262.79	239.206			-2.10903	101.385	0.606853	4	233.422	18.8234	4	212.065	20.6996	4
	-2.04522	101.643	200.597	180.109	98.6853	198.12	172.156	101.248	267.734	255.212	100.516	262.588	236.13			-2.04522	100.523	0.655489	4	232.26	19.0313	4	210.902	20.5128	4
	-1.98115	100.287	197.099	177.613	99.7535	198.12	168.488	103.877	268.242	254.663	100.019	255.589	238.311			-1.98115	100.984	0.970434	4	229.762	18.7436	4	209.769	21.5412	4
	-1.91735	98.3162	197.611	178.783	99.4248	193.761	172.53	102.131	270.427	258.653	101.052	267.069	237.919			-1.91735	100.231	0.846453	4	232.217	21.117	4	211.971	21.4274	4
	-1.85355	98.6037	196.331	176.911	96.3846	192.735	167.74	101.747	267.937	249.975	101.472	259.718	234.34			-1.85355	99.5518	1.27266	4	229.18	20.0872	4	207.241	20.4956	4
	-1.78948	99.8768	195.051	177.847	97.9458	199.573	166.617	100.787	266.311	252.519	100.937	253.927	236.409			-1.78948	99.8866	0.688028	4	228.716	18.3295	4	208.348	21.2334	4
	-1.72568	98.6448	196.331	177.067	97.7403	193.248	163.922	99.904	262.398	253.815	98.8528	260.272	238.031			-1.72568	98.7855	0.444202	4	228.062	19.2253	4	208.209	22.1744	4
	-1.66188	101.478	190.188	176.989	97.4117	192.051	165.644	100.115	259.654	251.172	98.4321	254.381	235.459			-1.66188	99.3593	0.899764	4	224.069	19.0574	4	207.316	21.1575	4
	-1.59783	98.1109	196.843	177.613	96.5078	191.88	163.323	100.537	263.77	249.277	98.7189	256.898	240.045			-1.59783	98.4688	0.832429	4	227.348	19.1231	4	207.565	21.6972	4
	-1.53403	99.0144	193.857	176.131	96.0148	189.231	167.74	100.653	265.955	252.319	100.899	254.33	233.501			-1.53403	99.1451	1.12411	4	225.843	19.9668	4	207.423	20.9159	4
	-1.46997	98.6037	193.686	177.223	98.0279	194.017	166.093	100.557	264.787	255.86	99.6367	261.078	236.633			-1.46997	99.2062	0.559778	4	228.392	19.9563	4	208.952	22.0043	4
	-1.40615	99.2197	193.686	175.195	96.0559	190.513	165.494	102.687	263.567	250.723	99.2543	261.581	235.347			-1.40615	99.3042	1.35417	4	227.337	20.3586	4	206.69	21.3096	4
	-1.34235	96.7967	190.785	178.705	94.4125	193.248	164.671	100.441	264.38	252.319	99.2161	259.617	241.443			-1.34235	97.7167	1.33656	4	227.008	20.2318	4	209.285	22.0069	4
	-1.27855	96.6735	192.491	174.805	96.3024	193.932	165.269	98.4069	264.228	248.878	99.5985	258.409	234.452			-1.27855	97.7453	0.769346	4	227.265	19.6987	4	205.851	20.9762	4
	-1.21477	97.8234	195.392	174.103	94.4947	190.171	162.725	101.631	261.789	248.379	99.9809	260.876	234.34			-1.21477	98.4826	1.54107	4	227.057	19.8184	4	204.887	21.3783	4
	-1.15068	98.0698	187.884	172.231	94.0427	189.829	164.296	99.5969	263.516	251.571	100.287	258.308	240.157			-1.15068	97.9991	1.39775	4	224.884	20.8316	4	207.064	22.5803	4
	-1.0869	95.8932	193.003	170.437	94.7412	190.085	163.847	98.7332	261.992	249.576	99.7323	261.078	234.899			-1.0869	97.275	1.1724	4	226.54	20.2141	4	204.69	21.9256	4
	-1.02308	94.9487	191.553	173.245	95.6861	188.632	163.922	99.7889	262.754	251.172	100.229	256.747	237.752			-1.02308	97.6633	1.36569	4	224.922	20.1547	4	206.523	22.1567	4
	-0.959033	99.7947	188.993	173.557	94.9877	190.171	162.949	98.9635	262.043	250.424	97.3231	253.525	236.298			-0.959033	97.7673	1.05928	4	223.683	19.7662	4	205.807	21.9795	4
	-0.895217	96.5914	190.102	172.933	93.673	189.915	161.302	97.5432	260.467	250.973	98.9866	251.611	236.521			-0.895217	96.6985	1.12229	4	223.024	19.1471	4	205.432	22.4427	4
	-0.0636	100.493	100.853	102.886	100.164	101.111	100.973	101.113	105.03	102.843	101.262	101.662	101.902			-0.0636	100.758	0.258682	4	102.164	0.970224	4	102.151	0.453573	4
	0	100	100	100	100	100	100	100	100	100	100	100	100			0	100	0	4	100	0	4	100	0	4
	0.0638167	100.164	100.597	99.298	98.2334	99.8291	101.048	101.209	102.236	99.4015	98.3365	97.0796	98.9933			0.0638167	99.4858	0.725713	4	99.9354	1.07615	4	99.6852	0.462432	4
	0.127867	101.396	96.843	100.312	98.4388	96.2393	96.7066	102.092	99.0346	101.845	98.4512	97.0292	98.1544			0.127867	100.095	0.96293	4	97.2865	0.606572	4	99.2546	1.13773	4
	0.191933	98.6858	94.3686	98.6739	98.1512	95.9829	99.7006	100.173	100.661	99.0524	99.4646	96.8781	95.1342			0.191933	99.1186	0.44291	4	96.9726	1.3345	4	98.1403	1.02419	4
	0.255733	98.8912	97.7816	97.3479	99.3837	95.4701	94.7605	101.171	98.0691	97.8554	99.4837	93.7563	94.6868			0.255733	99.7324	0.496661	4	96.2693	1.01981	4	96.1626	0.837371	4
	0.319533	98.3573	94.2833	100.156	100.041	92.3077	95.2096	99.5777	96.0874	96.1596	99.1013	91.7925	93.6801			0.319533	99.2694	0.359488	4	93.6177	0.982756	4	96.3013	1.38267	4
	0.383583	98.4394	91.8942	95.6318	98.4388	92.2222	94.8353	98.618	96.6463	95.5112	98.4321	92.4975	94.7987			0.383583	98.4821	0.0453459	4	93.3151	1.11725	4	95.1943	0.219329	4
	0.44765	98.7269	90.4437	96.7239	97.4938	91.1111	93.7126	100.537	95.5793	93.0673	100.612	91.6415	89.3177			0.44765	99.3425	0.754744	4	92.1939	1.15476	4	93.2054	1.52125	4
	0.51145	99.384	90.785	95.0078	97.4528	93.4188	94.6856	98.6756	96.1382	93.8653	100.038	88.57	89.4855			0.51145	98.8876	0.553324	4	92.228	1.63735	4	93.2611	1.2813	4
	0.57525	98.3984	91.2969	95.3198	98.1101	88.7179	90.7934	100.595	95.4268	92.2195	98.0115	88.57	89.7651			0.57525	98.7787	0.61096	4	91.0029	1.60202	4	92.0244	1.20822	4
	0.6393	100.246	89.3345	93.4477	99.6713	90.3419	92.7395	99.1747	90.2947	91.2219	100.516	89.577	88.255			0.6393	99.9022	0.299752	4	89.887	0.254053	4	91.4161	1.15141	4
	0.703383	95.6468	89.1638	93.9158	99.7535	88.9744	90.6437	100.48	92.7337	91.8204	99.6176	85.9013	87.472			0.703383	98.8744	1.09239	4	89.1933	1.39704	4	90.963	1.34607	4
	0.767183	94.1684	89.3345	93.0577	95.9737	86.4103	92.8892	98.3493	92.2764	90.8728	99.675	86.1027	85.4027			0.767183	97.0416	1.22612	4	88.531	1.44533	4	90.5556	1.78791	4
	0.83125	96.5092	89.4198	92.0437	95.5218	86.1538	89.5958	98.81	88.872	89.7257	98.6424	85.2467	86.0179			0.83125	97.3709	0.808782	4	87.4231	1.0179	4	89.3458	1.24366	4
	0.895033	93.7166	87.5427	90.4836	98.1101	86.5812	91.5419	97.8887	88.9736	90.3741	98.4704	84.6425	85.5145			0.895033	97.0464	1.11639	4	86.935	0.908561	4	89.4785	1.34731	4
	0.95885	95.3183	84.9829	91.0296	94.9877	83.7607	86.3024	98.9251	87.5	87.8803	98.0306	82.7795	83.2215			0.95885	96.8154	0.979356	4	84.7558	1.01974	4	87.1085	1.62608	4
	1.02292	93.2649	85.8362	91.2637	95.2342	85.0427	89.4461	98.6564	89.2276	87.9302	99.1205	81.9738	83.8367			1.02292	96.569	1.40137	4	85.5201	1.49024	4	88.1192	1.58177	4
	1.0867	95.1129	83.959	89.3916	98.069	83.4188	85.8533	98.3685	87.1951	86.3342	97.2275	81.8228	81.4877			1.0867	97.1945	0.734682	4	84.0989	1.12729	4	85.7667	1.62735	4
	1.15052	96.6324	82.9352	87.3635	95.3574	81.1111	87.2754	97.3512	87.2967	86.6833	97.9159	80.6647	82.1029			1.15052	96.8143	0.552063	4	83.0019	1.5135	4	85.8563	1.26021	4
	1.21457	95.5236	81.4846	88.7676	97.8636	82.8205	88.1737	98.119	85.1118	85.8354	97.4187	80.8157	80.9284			1.21457	97.2312	0.587307	4	82.5582	0.947735	4	85.9263	1.7821	4
	1.27837	97.3717	82.5939	88.0655	95.6039	80.1709	86.3772	97.9846	87.0427	87.2818	97.782	82.0745	81.9911			1.27837	97.1856	0.542407	4	82.9705	1.45387	4	85.9289	1.35718	4
	1.34243	93.7577	81.3993	87.9095	96.138	80.7692	84.8802	96.6219	81.8089	86.0349	97.782	80.3122	79.9217			1.34243	96.0749	0.845916	4	81.0724	0.331562	4	84.6866	1.70653	4
	1.40623	93.3881	80.0341	87.2075	94.8644	80.6838	84.506	96.3148	83.0793	84.2893	98.6042	77.1903	79.5302			1.40623	95.7929	1.11134	4	80.2469	1.2111	4	83.8832	1.59563	4
	1.4703	95.1951	80.5461	86.5835	97.3295	79.9145	86.2275	96.8138	82.3171	83.9401	98.9293	77.9456	80.4251			1.4703	97.0669	0.769475	4	80.1808	0.902035	4	84.2941	1.4164	4
	1.53435	95.0308	81.2287	85.8814	93.8784	79.8291	84.2066	97.1785	82.7236	83.4913	97.4187	78.147	78.2438			1.53435	95.8766	0.855441	4	80.4821	0.977267	4	82.9558	1.64856	4
	1.59815	95.2361	76.4505	88.6115	95.9326	78.1197	83.5329	97.9463	82.3171	85.2369	98.6807	76.6365	79.5861			1.59815	96.9489	0.814463	4	78.3809	1.36416	4	84.2419	1.87667	4
	1.66222	94.7023	77.3038	86.5055	94.8233	78.3761	83.4581	97.4472	81.7073	83.2918	96.4054	76.3847	76.0067			1.66222	95.8445	0.660224	4	78.443	1.16171	4	82.3155	2.22889	4
	1.72603	95.6468	79.6075	86.2715	95.152	78.0342	84.6557	97.0633	78.811	82.5935	98.2792	75.6798	76.9016			1.72603	96.5353	0.708447	4	78.0331	0.847647	4	82.6056	2.04486	4
	1.79008	94.6201	78.4983	86.5835	94.6179	79.1453	83.2335	98.4645	79.9289	81.7955	96.195	75.4783	77.5727			1.79008	95.9744	0.909366	4	78.2627	0.973104	4	82.2963	1.86684	4
	1.8539	94.4559	77.3038	86.1154	96.6311	78.2906	81.8114	98.5605	80.0813	82.7431	95.8126	75.5287	75.6152			1.8539	96.365	0.858332	4	77.8011	0.95088	4	81.5713	2.19004	4
	1.91795	94.1684	75.4266	83.2293	94.7001	77.1795	83.5329	97.2745	79.3191	82.9925	98.7189	73.2628	74.8322			1.91795	96.2155	1.07532	4	76.297	1.28697	4	81.1467	2.10775	4
	1.98175	94.6201	75.1706	84.1654	96.2202	77.3504	81.6617	97.9079	80.0305	79.8504	96.7304	72.1047	75.3356			1.98175	96.3696	0.681875	4	76.1641	1.67883	4	80.2532	1.86266	4
	2.04555	93.306	76.6212	83.9314	95.3985	75.3846	79.5659	96.6027	78.0488	79.8504	98.1071	70.997	74.1051			2.04555	95.8536	1.01394	4	75.2629	1.52258	4	79.3632	2.01647	4
	2.10987	93.6756	75.6826	84.0874	94.0016	76.8376	81.9611	95.4127	77.8963	79.8005	97.8011	71.9033	73.8814			2.10987	95.2228	0.938488	4	75.58	1.30625	4	79.9326	2.19869	4
	2.17367	95.1951	75	81.9813	93.7962	75.2137	80.7635	96.5259	75.6098	79.3516	98.1071	70.9466	71.1409			2.17367	95.9061	0.921303	4	74.1925	1.08931	4	78.3093	2.44912	4
	2.23773	95.77	74.1468	80.1092	94.0016	73.1624	78.6677	95.4127	75.4573	79.5012	96.826	70.6949	70.3579			2.23773	95.5026	0.583372	4	73.3653	1.00663	4	77.159	2.2862	4
	2.30153	93.7988	74.4027	82.6833	94.2482	73.8462	80.7635	97.4664	73.9837	77.9551	97.5717	69.8389	71.0291			2.30153	95.7713	1.01348	4	73.0179	1.06626	4	78.1077	2.55146	4
	2.36533	93.963	74.3174	79.8752	92.6459	74.5299	79.1916	98.2726	74.5935	77.0075	96.1185	70.3927	70.0783			2.36533	95.25	1.23585	4	73.4584	1.02358	4	76.5382	2.23843	4
	2.42913	93.6756	75.256	80.1872	93.4265	74.5299	80.6886	98.2917	74.6951	78.4539	97.5143	70.3927	70.5817			2.42913	95.727	1.26733	4	73.7184	1.1194	4	77.4778	2.34804	4
	2.49295	95.0308	72.099	80.4992	95.2342	73.9316	78.8922	96.7562	74.2886	76.5586	96.6539	66.5156	68.736			2.49295	95.9188	0.45634	4	71.7087	1.79624	4	76.1715	2.60716	4
	2.557	94.3737	72.7816	81.6693	94.0838	73.4188	79.1916	96.142	71.5955	76.409	98.2027	67.2205	68.4004			2.557	95.7006	0.949995	4	71.2541	1.39658	4	76.4176	2.88025	4
	2.6208	95.0719	72.099	81.2793	94.2892	73.7607	79.4162	96.9098	72.6626	76.2095	98.7954	66.717	69.1275			2.6208	96.2666	1.00606	4	71.3098	1.56932	4	76.5081	2.67368	4
	2.6846	95.3593	72.1843	81.7473	94.7412	73.3333	78.518	97.5624	71.8496	75.5611	97.8585	66.4653	66.8904			2.6846	96.3804	0.780573	4	70.9581	1.53095	4	75.6792	3.19032	4
	2.74867	94.1273	73.3788	79.9532	96.59	71.6239	77.5449	94.8944	72.1037	76.2594	96.9598	64.8036	66.387			2.74867	95.6429	0.676297	4	70.4775	1.9272	4	75.0361	2.98294	4
	2.81273	94.4559	71.7577	79.2512	94.9055	72.906	78.5928	97.9079	70.7317	73.1172	97.4187	65.5086	66.3311			2.81273	96.172	0.871626	4	70.226	1.63397	4	74.3231	2.99781	4
	2.8768	94.0452	71.7577	78.7832	93.4675	72.2222	77.3204	95.2207	69.9187	73.8653	98.6233	64.6022	67.7852			2.8768	95.3392	1.15388	4	69.6252	1.74663	4	74.4385	2.44567	4
	2.9406	93.347	71.2457	79.5632	95.4396	71.5385	78.518	96.9866	70.0711	73.9651	98.7572	63.142	64.9888			2.9406	96.1326	1.14954	4	68.9993	1.97802	4	74.2588	3.32034	4
	3.0044	92.6078	71.6724	78.8612	91.8652	72.5641	77.5449	98.0422	70.8841	73.4663	97.2849	62.6888	64.038			3.0044	94.95	1.58154	4	69.4524	2.28047	4	73.4776	3.34952	4
	3.06845	92.4846	71.0751	79.5632	91.3311	68.1197	77.021	96.0845	68.9533	73.0673	97.457	63.6455	64.877			3.06845	94.3393	1.4507	4	67.9484	1.56338	4	73.6321	3.2098	4
	3.13227	92.9774	72.6962	76.5991	94.8644	72.2222	75.1497	95.1056	69.7663	70.6234	97.8011	63.0916	63.4228			3.13227	95.1871	0.992755	4	69.4441	2.21269	4	71.4488	2.96254	4
	3.19607	94.4969	69.7099	79.0952	95.5218	70.5983	75.8234	97.524	68.3943	72.5686	96.8069	62.8399	63.9821			3.19607	96.0874	0.672744	4	67.8856	1.74176	4	72.8673	3.24757	4
	3.26012	92.3614	71.4164	77.3011	94.6179	71.3675	77.0958	97.62	68.4451	72.8678	97.8394	62.4874	62.0805			3.26012	95.6097	1.30855	4	68.4291	2.09885	4	72.3363	3.56797	4
	3.32418	94.0041	70.2218	78.1591	94.7001	71.1111	76.497	95.3935	68.3435	71.4713	95.9847	62.0342	63.311			3.32418	95.0206	0.428613	4	67.9277	2.04742	4	72.3596	3.33441	4
	3.38798	93.347	71.3311	77.9251	94.0427	70.5983	77.021	98.1958	65.752	71.0224	96.9216	61.43	60.906			3.38798	95.6268	1.15408	4	67.2778	2.30903	4	71.7186	3.91612	4
	3.45178	92.6899	68.43	75.351	92.0296	71.7949	76.2725	93.7812	65.7012	70.8728	98.8337	60.7251	61.5213			3.45178	94.3336	1.54288	4	66.6628	2.33885	4	71.0044	3.37383	4
	3.51585	94.5791	70.3072	76.4431	93.5908	69.3162	74.6257	96.5067	65.3963	69.5262	96.7495	61.43	60.6823			3.51585	95.3565	0.762978	4	66.6124	2.02686	4	70.3193	3.53018	4
	3.5799	95.0308	68.1741	75.663	93.8373	69.7436	72.9042	97.2553	64.8374	70.0249	97.5335	60.0705	60.6264			3.5799	95.9142	0.890431	4	65.7064	2.13906	4	69.8046	3.26875	4
	3.64398	94.9076	68.43	77.4571	94.8644	67.5214	73.9521	96.7754	64.4817	70.5736	98.0306	60.574	60.4027			3.64398	96.1445	0.770494	4	65.2518	1.7731	4	70.5964	3.67698	4
	3.70777	93.922	66.7235	76.209	94.7412	68.4615	74.9251	96.6411	63.9228	68.0798	97.1702	58.862	59.7315			3.70777	95.6186	0.769266	4	64.4925	2.09678	4	69.7364	3.78219	4
	3.77183	92.3614	68.2594	77.4571	90.4684	68.7179	74.0269	94.5489	63.1606	67.7307	95.1434	60.0705	60.123			3.77183	93.1305	1.07013	4	65.0521	2.08406	4	69.8344	3.81247	4
	3.8359	95.8111	68.0887	75.429	94.6179	68.6325	72.5299	98.7332	64.939	66.8329	96.6157	58.2075	59.1163			3.8359	96.4445	0.866272	4	64.9669	2.39571	4	68.4771	3.59493	4
	3.89997	93.3881	68.0887	76.131	92.728	68.9744	74.6257	96.3916	63.5163	69.5761	96.4627	58.1067	59.6756			3.89997	94.7426	0.981966	4	64.6715	2.4937	4	70.0021	3.71663	4
	3.96403	92.9363	67.9181	75.273	92.3172	68.6325	74.1766	95.1056	62.9573	67.182	95.4876	58.5599	58.1096			3.96403	93.9617	0.784886	4	64.517	2.35273	4	68.6853	3.95451	4
	4.02783	93.963	67.6621	74.259	94.0427	68.0342	73.7275	96.6411	62.6016	68.4788	99.044	57.855	58.8926			4.02783	95.9227	1.21219	4	64.0382	2.4048	4	68.8395	3.56294	4
	4.09188	93.6756	68.43	74.415	94.3714	67.7778	72.1557	97.1785	63.1606	67.98	98.5851	57.4522	58.4452			4.09188	95.9526	1.15895	4	64.2051	2.53816	4	68.249	3.52927	4
	4.1557	92.6899	66.2969	72.5429	93.4675	64.7009	73.6527	96.334	62.3984	65.8853	96.4818	56.5962	58.2774			4.1557	94.7433	0.974534	4	62.4981	2.12379	4	67.5896	3.54634	4
	4.21948	92.731	67.4061	73.791	94.0016	67.6068	71.7814	96.6987	61.5346	66.8828	97.2658	55.9919	56.0962			4.21948	95.1743	1.08177	4	63.1349	2.76624	4	67.1378	3.95611	4
	4.28355	92.115	67.9181	73.869	94.8233	67.6068	72.6048	95.547	60.4167	66.3342	96.2141	54.8842	57.3266			4.28355	94.6749	0.899308	4	62.7064	3.13057	4	67.5336	3.78015	4
	4.34735	91.8275	65.8703	73.1669	91.0025	66.6667	73.4281	95.3551	59.502	64.4389	97.9732	54.5821	56.0403			4.34735	94.0396	1.61559	4	61.6553	2.85113	4	66.7686	4.14138	4
	4.4114	92.2382	65.529	73.6349	94.7001	65.9829	73.7275	96.142	60.6199	65.0374	98.26	55.8912	55.7047			4.4114	95.3351	1.26493	4	62.0058	2.37239	4	67.0262	4.2887	4
	4.47547	90.5955	65.1877	73.791	92.4815	65.812	72.1557	95.7965	58.7907	64.1895	95.9465	53.1722	56.5996			4.47547	93.705	1.3091	4	60.7406	2.98019	4	66.6839	3.96197	4
	4.53927	88.6653	64.6758	73.791	94.6179	66.9231	71.9311	95.5662	60.9248	63.7406	96.4054	55.0352	55.2013			4.53927	93.8137	1.75454	4	61.8897	2.59826	4	66.166	4.25718	4
	4.60333	91.0883	66.4676	73.4009	93.18	66.3248	70.1347	95.6046	59.0955	64.8379	95.7744	54.3807	54.8658			4.60333	93.9118	1.11215	4	61.5671	2.94963	4	65.8098	4.05223	4
	4.6674	91.4579	66.8942	74.493	93.9195	67.3504	71.8563	95.0096	60.1626	64.6384	97.935	53.9275	55.0895			4.6674	94.5805	1.34239	4	62.0837	3.17666	4	66.5193	4.34206	4
	4.73118	90.1027	65.1024	75.039	92.235	66.8376	69.6108	95.7774	58.3333	63.3416	95.8317	53.3736	54.9217			4.73118	93.4867	1.40726	4	60.9117	3.11112	4	65.7283	4.32282	4
	4.79503	90.924	64.8464	72.3089	91.9474	65.5556	70.6587	95.739	57.7744	62.5436	96.8451	52.719	53.5794			4.79503	93.8639	1.43525	4	60.2238	3.05665	4	64.7727	4.29823	4
	4.85907	90.924	64.3345	72.4649	93.6319	65.641	71.7066	94.7025	57.1138	63.4913	95.1434	53.2729	53.8031			4.85907	93.6004	0.946902	4	60.0906	2.94618	4	65.3665	4.3571	4
	4.92287	90.0205	65.785	72.3089	93.1389	64.7009	70.0599	95.8349	57.5203	62.5935	97.0172	52.2659	53.5794			4.92287	94.0029	1.55585	4	60.068	3.18213	4	64.6354	4.22997	4
	4.98693	90.7187	65.4437	72.8549	93.0567	65.4701	68.4132	96.1036	56.7581	62.394	96.6539	51.863	53.2998			4.98693	94.1332	1.38607	4	59.8837	3.36924	4	64.2405	4.23013	4
	6.25427	69.8152	18.0034	21.8409	67.3788	17.1795	24.476	88.906	18.3943	17.4564	88.1836	16.0121	17.0022			6.25427	78.5709	5.78174	4	17.3973	0.526599	4	20.1939	1.79653	4
	6.31798	69.4456	18.942	23.0889	64.8316	17.6068	24.7754	88.3685	17.2764	17.3067	88.5277	15.2568	16.6667			6.31798	77.7933	6.2233	4	17.2705	0.761686	4	20.4594	2.03852	4
	6.38205	69.1581	19.1126	23.3229	64.544	17.9487	25.3743	88.618	15.9553	16.5586	86.8069	14.7029	16.2192			6.38205	77.2817	6.10658	4	16.9299	0.987911	4	20.3688	2.33663	4
	6.44585	69.0349	18.7713	24.337	64.4207	18.7179	26.5719	90.2879	15.9045	16.808	88.0115	14.7029	16.9463			6.44585	77.9387	6.55729	4	17.0242	1.02321	4	21.1658	2.51788	4
	6.5099	68.8296	18.686	23.7129	64.9548	18.2051	26.1228	87.2169	15.752	16.409	89.0249	14.7533	16.5548			6.5099	77.5065	6.19003	4	16.8491	0.949084	4	20.6999	2.48461	4
	6.57372	68.5421	18.7713	24.181	65.6122	17.6923	25.5988	88.2534	15.3963	16.6584	87.1702	14.6526	16.7785			6.57372	77.3944	5.99074	4	16.6281	0.963757	4	20.8042	2.37671	4
	6.63752	69.117	18.942	23.6349	64.0099	16.9231	25.8982	87.5624	15.3963	16.409	86.0612	14.8036	16.6107			6.63752	76.6876	5.94533	4	16.5163	0.923623	4	20.6382	2.42822	4
	6.70157	68.3778	18.942	23.869	65.3246	17.094	25	86.1804	14.8374	16.1097	86.1185	15.2568	16.4989			6.70157	76.5003	5.6057	4	16.5326	0.940818	4	20.3694	2.35964	4
	6.76537	69.8563	18.5154	23.4789	64.9548	17.5214	24.9251	88.2534	14.939	15.611	86.7304	14.6022	15.9396			6.76537	77.4487	5.89232	4	16.3945	0.961707	4	19.9887	2.45136	4
	6.82943	68.2957	19.7099	23.0109	64.8316	17.5214	25.3743	88.3877	14.8882	15.8603	87.1893	14.7029	16.0515			6.82943	77.1761	6.17261	4	16.7056	1.19041	4	20.0742	2.42648	4
	6.89332	69.4456	18.6007	23.0109	64.8316	17.6068	24.1766	87.6392	15.1931	15.6608	85.5449	15.4582	15.66			6.89332	76.8653	5.71019	4	16.7147	0.829	4	19.6271	2.3025	4
RAW DATA
		Concentration Mn/Mg (uM/mM)
		0/0	125/0	125/2	0/0	125/0	125/2	0/0	125/0	125/2	0/0	125/0	125/2
		3161	3054	3232	3069	2997	3081	6109	5950	5422	5696	6339	5534
		3182	3014	3241	3053	3042	3072	6170	5963	5292	5703	6246	5368
		3110	2990	3162	3054	2993	3042	5996	5939	5353	5680	6227	5474
		3173	2965	3106	3010	2947	2995	6098	5932	5353	5611	6163	5126
		3107	2937	3058	2985	2929	2964	5859	5893	5315	5617	6011	5114
		3056	2957	3021	2999	2855	2948	5877	5805	5270	5585	6045	5029
		3076	2883	3004	2889	2836	2972	5838	5784	5278	5467	5901	4966
		3014	2907	2969	2904	2789	2877	5760	5825	5251	5539	5895	4887
		2949	2812	2947	2872	2774	2860	5756	5776	5263	5452	5856	4908
		2972	2812	2838	2858	2757	2813	5757	5653	5238	5501	5756	4846
		2989	2890	2752	2821	2763	2810	5710	5717	5247	5378	5793	4876
		2926	2803	2779	2780	2716	2805	5596	5655	5146	5513	5608	4806
		2928	2745	2757	2778	2649	2769	5582	5647	5178	5423	5625	4830
		2860	2743	2709	2779	2649	2766	5533	5660	5219	5349	5599	4781
		2837	2723	2722	2783	2623	2730	5517	5634	5097	5349	5599	4709
		2852	2632	2730	2723	2600	2788	5504	5608	5163	5286	5517	4710
		2798	2684	2705	2650	2577	2714	5551	5576	5138	5382	5433	4687
		2774	2621	2664	2735	2582	2675	5433	5529	5127	5377	5515	4711
		2746	2594	2583	2697	2540	2619	5479	5564	5116	5391	5418	4740
		2721	2571	2613	2663	2564	2680	5404	5528	5085	5280	5400	4600
		2716	2608	2567	2597	2573	2634	5375	5431	5124	5239	5346	4678
		2694	2567	2615	2616	2530	2657	5377	5568	5247	5289	5417	4576
		2630	2539	2577	2587	2535	2559	5365	5407	5086	5256	5406	4647
		2735	2581	2571	2613	2433	2556	5374	5440	5130	5346	5322	4551
		2648	2536	2536	2615	2533	2516	5439	5477	5100	5325	5341	4560
		2624	2513	2552	2571	2460	2517	5313	5595	5082	5258	5314	4542
		2656	2515	2556	2583	2459	2491	5291	5428	4894	5206	5318	4430
		2636	2526	2513	2549	2488	2542	5340	5382	4989	5226	5225	4569
		2627	2485	2528	2530	2462	2540	5294	5429	5035	5252	5268	4585
		2591	2520	2447	2528	2476	2434	5403	5388	5011	5270	5186	4510
		2584	2489	2481	2510	2425	2515	5383	5446	4937	5203	5235	4445
		2572	2519	2461	2515	2443	2481	5336	5361	4929	5127	5129	4420
		2587	2482	2422	2522	2414	2473	5314	5400	5052	5204	5162	4400
		2562	2458	2410	2509	2380	2488	5200	5346	4994	5158	5301	4671
		2541	2488	2495	2512	2395	2498	5255	5362	5158	5148	5135	4411
		2557	2402	2411	2514	2368	2487	5278	5341	5096	5169	5145	4361
		2563	2411	2418	2472	2374	2473	5201	5458	5015	5154	5282	4416
		2542	2437	2457	2450	2361	2451	5266	5282	5030	5203	5174	4461
		2542	2401	2422	2482	2371	2448	5143	5383	4968	5069	5235	4399
		2503	2388	2439	2447	2360	2449	5258	5398	4965	5149	5159	4311
		2507	2393	2365	2453	2382	2373	5203	5437	4983	5157	5185	4339
		2526	2435	2369	2427	2299	2422	5294	5380	4994	5138	5120	4364
		2464	2392	2349	2449	2332	2385	5189	5450	5086	5181	5145	4352
		2478	2426	2355	2462	2329	2352	5257	5396	4980	5083	5147	4323
		2507	2416	2363	2405	2350	2371	5207	5354	5030	5072	5142	4410
		2508	2366	2370	2446	2346	2403	5100	5249	5042	5114	5141	4378
		2478	2391	2343	2450	2271	2374	5186	5385	4958	5107	5148	4231
		2459	2352	2345	2420	2336	2359	5181	5224	5001	5196	5110	4243
		2446	2344	2331	2445	2326	2388	5118	5394	5028	5144	5091	4343
		2444	2350	2350	2459	2355	2279	5374	5296	5116	5282	5219	4277
		2475	2351	2309	2402	2318	2300	5275	5269	5117	5257	5215	4222
		2442	2310	2277	2428	2318	2251	5412	5279	5106	5231	5076	4261
		2394	2316	2292	2420	2267	2305	5321	5322	5186	5285	5304	4254
		2401	2301	2268	2346	2255	2241	5301	5273	5012	5307	5158	4190
		2432	2286	2280	2384	2335	2226	5251	5241	5063	5279	5043	4227
		2402	2301	2270	2379	2261	2190	5205	5164	5089	5170	5169	4256
		2471	2229	2269	2371	2247	2213	5216	5110	5036	5148	5052	4210
		2389	2307	2277	2349	2245	2182	5238	5191	4998	5163	5102	4292
		2411	2272	2258	2337	2214	2241	5244	5234	5059	5277	5051	4175
		2401	2270	2272	2386	2270	2219	5239	5211	5130	5211	5185	4231
		2416	2270	2246	2338	2229	2211	5350	5187	5027	5191	5195	4208
		2357	2236	2291	2298	2261	2200	5233	5203	5059	5189	5156	4317
		2354	2256	2241	2344	2269	2208	5127	5200	4990	5209	5132	4192
		2382	2290	2232	2300	2225	2174	5295	5152	4980	5229	5181	4190
		2388	2202	2208	2289	2221	2195	5189	5186	5044	5245	5130	4294
		2335	2262	2185	2306	2224	2189	5144	5156	5004	5216	5185	4200
		2312	2245	2221	2329	2207	2190	5199	5171	5036	5242	5099	4251
		2430	2215	2225	2312	2225	2177	5156	5157	5021	5090	5035	4225
		2352	2228	2217	2280	2222	2155	5082	5126	5032	5177	4997	4229
		2447	1182	1319	2438	1183	1349	5268	2067	2062	5296	2019	1822
		2435	1172	1282	2434	1170	1336	5210	1968	2005	5230	1986	1788
		2439	1179	1273	2391	1168	1350	5273	2012	1993	5143	1928	1770
		2469	1135	1286	2396	1126	1292	5319	1949	2042	5149	1927	1755
		2403	1106	1265	2389	1123	1332	5219	1981	1986	5202	1924	1701
		2408	1146	1248	2419	1117	1266	5271	1930	1962	5203	1862	1693
		2395	1105	1284	2435	1080	1272	5188	1891	1928	5183	1823	1675
		2397	1077	1226	2396	1079	1267	5138	1902	1915	5148	1837	1695
		2404	1060	1240	2373	1066	1252	5238	1881	1866	5262	1820	1597
		2420	1064	1218	2372	1093	1265	5141	1892	1882	5232	1759	1600
		2396	1070	1222	2388	1038	1213	5241	1878	1849	5126	1759	1605
		2441	1047	1198	2426	1057	1239	5167	1777	1829	5257	1779	1578
		2329	1045	1204	2428	1041	1211	5235	1825	1841	5210	1706	1564
		2293	1047	1193	2336	1011	1241	5124	1816	1822	5213	1710	1527
		2350	1048	1180	2325	1008	1197	5148	1749	1799	5159	1693	1538
		2282	1026	1160	2388	1013	1223	5100	1751	1812	5150	1681	1529
		2321	996	1167	2312	980	1153	5154	1722	1762	5127	1644	1488
		2271	1006	1170	2318	995	1195	5140	1756	1763	5184	1628	1499
		2316	984	1146	2387	976	1147	5125	1716	1731	5085	1625	1457
		2353	972	1120	2321	949	1166	5072	1718	1738	5121	1602	1468
		2326	955	1138	2382	969	1178	5112	1675	1721	5095	1605	1447
		2371	968	1129	2327	938	1154	5105	1713	1750	5114	1630	1466
		2283	954	1127	2340	945	1134	5034	1610	1725	5114	1595	1429
		2274	938	1118	2309	944	1129	5018	1635	1690	5157	1533	1422
		2318	944	1110	2369	935	1152	5044	1620	1683	5174	1548	1438
		2314	952	1101	2285	934	1125	5063	1628	1674	5095	1552	1399
		2319	896	1136	2335	914	1116	5103	1620	1709	5161	1522	1423
		2306	906	1109	2308	917	1115	5077	1608	1670	5042	1517	1359
		2329	933	1106	2316	913	1131	5057	1551	1656	5140	1503	1375
		2304	920	1110	2303	926	1112	5130	1573	1640	5031	1499	1387
		2300	906	1104	2352	916	1093	5135	1576	1659	5011	1500	1352
		2293	884	1067	2305	903	1116	5068	1561	1664	5163	1455	1338
		2304	881	1079	2342	905	1091	5101	1575	1601	5059	1432	1347
		2272	898	1076	2322	882	1063	5033	1536	1601	5131	1410	1325
		2281	887	1078	2288	899	1095	4971	1533	1600	5115	1428	1321
		2318	879	1051	2283	880	1079	5029	1488	1591	5131	1409	1272
		2332	869	1027	2288	856	1051	4971	1485	1594	5064	1404	1258
		2284	872	1060	2294	864	1079	5078	1456	1563	5103	1387	1270
		2288	871	1024	2255	872	1058	5120	1468	1544	5027	1398	1253
		2281	882	1028	2274	872	1078	5121	1470	1573	5100	1398	1262
		2314	845	1032	2318	865	1054	5041	1462	1535	5055	1321	1229
		2298	853	1047	2290	859	1058	5009	1409	1532	5136	1335	1223
		2315	845	1042	2295	863	1061	5049	1430	1528	5167	1325	1236
		2322	846	1048	2306	858	1049	5083	1414	1515	5118	1320	1196
		2292	860	1025	2351	838	1036	4944	1419	1529	5071	1287	1187
		2300	841	1016	2310	853	1050	5101	1392	1466	5095	1301	1186
		2290	841	1010	2275	845	1033	4961	1376	1481	5158	1283	1212
		2273	835	1020	2323	837	1049	5053	1379	1483	5165	1254	1162
		2255	840	1011	2236	849	1036	5108	1395	1473	5088	1245	1145
		2252	833	1020	2223	797	1029	5006	1357	1465	5097	1264	1160
		2264	852	982	2309	845	1004	4955	1373	1416	5115	1253	1134
		2301	817	1014	2325	826	1013	5081	1346	1455	5063	1248	1144
		2249	837	991	2303	835	1030	5086	1347	1461	5117	1241	1110
		2289	823	1002	2305	832	1022	4970	1345	1433	5020	1232	1132
		2273	836	999	2289	826	1029	5116	1294	1424	5069	1220	1089
		2257	802	966	2240	840	1019	4886	1293	1421	5169	1206	1100
		2303	824	980	2278	811	997	5028	1287	1394	5060	1220	1085
		2314	799	970	2284	816	974	5067	1276	1404	5101	1193	1084
		2311	802	993	2309	790	988	5042	1269	1415	5127	1203	1080
		2287	782	977	2306	801	1001	5035	1258	1365	5082	1169	1068
		2249	800	993	2202	804	989	4926	1243	1358	4976	1193	1075
		2333	798	967	2303	803	969	5144	1278	1340	5053	1156	1057
		2274	798	976	2257	807	997	5022	1250	1395	5045	1154	1067
		2263	796	965	2247	803	991	4955	1239	1347	4994	1163	1039
		2288	793	952	2289	796	985	5035	1232	1373	5180	1149	1053
		2281	802	954	2297	793	964	5063	1243	1363	5156	1141	1045
		2257	777	930	2275	757	984	5019	1228	1321	5046	1124	1042
		2258	790	946	2288	791	959	5038	1211	1341	5087	1112	1003
		2243	796	947	2308	791	970	4978	1189	1330	5032	1090	1025
		2236	772	938	2215	780	981	4968	1171	1292	5124	1084	1002
		2246	768	944	2305	772	985	5009	1193	1304	5139	1110	996
		2206	764	946	2251	770	964	4991	1157	1287	5018	1056	1012
		2159	758	946	2303	783	961	4979	1199	1278	5042	1093	987
		2218	779	941	2268	776	937	4981	1163	1300	5009	1080	981
		2227	784	955	2286	788	960	4950	1184	1296	5122	1071	985
		2194	763	962	2245	782	930	4990	1148	1270	5012	1060	982
		2214	760	927	2238	767	944	4988	1137	1254	5065	1047	958
		2214	754	929	2279	768	958	4934	1124	1273	4976	1058	962
		2192	771	927	2267	757	936	4993	1132	1255	5074	1038	958
		2209	767	934	2265	766	914	5007	1117	1251	5055	1030	953
		1700	211	280	1640	201	327	4632	362	350	4612	318	304
		1691	222	296	1578	206	331	4604	340	347	4630	303	298
		1684	224	299	1571	210	339	4617	314	332	4540	292	290
		1681	220	312	1568	219	355	4704	313	337	4603	292	303
		1676	219	304	1581	213	349	4544	310	329	4656	293	296
		1669	220	310	1597	207	342	4598	303	334	4559	291	300
		1683	222	303	1558	198	346	4562	303	329	4501	294	297
		1665	222	306	1590	200	334	4490	292	323	4504	303	295
		1701	217	301	1581	205	333	4598	294	313	4536	290	285
		1663	231	295	1578	205	339	4605	293	318	4560	292	287
		1691	218	295	1578	206	323	4566	299	314	4474	307	280

## Sheet: Fig8G
Elen-T224A
lipid to protein ratio 50
Magnesium transport
NORMALIZED DATA
																					Condition
		Concentrations Mg (mM)																			Mean	SEM	N
	Time (min)	0	0	0	0.8	2.5	2.5	5	0	5	0.8	0.8	0.8	2.5	2.5	5	5			Time (min)	0 mM Mg2+			0.8 mM Mg2+			2.5 mM Mg2+			5 mM Mg2+
	-8.24797	85.7143	90	87.8788	85.119	82.2857	66.8246	63.3929	55.5118	81.4815	89.1892	90.2655	85.3448	79.6748	79.8387	71.5328	71.8519			-8.24797	79.7762	8.13531	4	87.4796	1.31698	4	77.156	3.49514	4	72.0648	3.69915	4
	-8.15982	86.3095	88.75	87.2727	86.3095	80.5714	68.2464	63.3929	55.5118	81.4815	90.991	88.4956	84.4828	80.4878	78.2258	72.2628	71.1111			-8.15982	79.461	7.99883	4	87.5697	1.40475	4	76.8829	2.92962	4	72.0621	3.70613	4
	-8.0718	86.3095	91.875	84.2424	84.5238	77.7143	65.8768	63.3929	55.5118	81.4815	89.1892	90.2655	84.4828	80.4878	77.4194	74.4526	69.6296			-8.0718	79.4847	8.15186	4	87.1153	1.524	4	75.3746	3.24048	4	72.2391	3.82303	4
	-7.98403	85.7143	86.875	86.6667	84.5238	78.8571	70.6161	63.8393	55.5118	81.4815	90.0901	92.0354	85.3448	78.0488	78.2258	70.8029	71.1111			-7.98403	78.6919	7.73084	4	87.9985	1.82087	4	76.437	1.94802	4	71.8087	3.63516	4
	-7.89628	83.9286	86.875	89.0909	82.1429	80	68.2464	61.1607	57.4803	80	89.1892	90.2655	84.4828	81.3008	79.0323	70.8029	72.5926			-7.89628	79.3437	7.36409	4	86.5201	1.9249	4	77.1449	3.00233	4	71.1391	3.87631	4
	-7.80825	83.3333	85	85.4545	80.9524	79.4286	67.2986	60.2679	55.9055	80.7407	87.3874	86.7257	81.8966	78.8618	78.2258	69.3431	71.8519			-7.80825	77.4233	7.18709	4	84.2405	1.64278	4	75.9537	2.89547	4	70.5509	4.21036	4
	-7.72048	81.5476	85.625	84.8485	82.7381	77.1429	67.7725	62.5	54.3307	80	88.2883	88.4956	81.0345	82.1138	76.6129	68.6131	70.3704			-7.72048	76.588	7.47154	4	85.1391	1.91041	4	75.9105	2.98217	4	70.3709	3.62584	4
	-7.63247	81.5476	86.875	82.4242	81.5476	77.7143	68.7204	60.2679	51.5748	81.4815	87.3874	90.2655	81.8966	79.6748	77.4194	68.6131	69.6296			-7.63247	75.6054	8.09465	4	85.2743	2.13453	4	75.8822	2.43917	4	69.998	4.36463	4
	-7.54472	80.9524	86.25	79.3939	80.3571	76	67.7725	60.7143	50.7874	82.2222	87.3874	89.3805	83.6207	80.4878	79.0323	72.9927	70.3704			-7.54472	74.3459	7.98874	4	85.1864	2.00433	4	75.8231	2.84168	4	71.5749	4.42323	4
	-7.45722	79.7619	83.75	81.8182	80.3571	74.8571	66.8246	60.2679	50	83.7037	83.7838	85.8407	81.8966	79.6748	78.2258	70.073	68.1481			-7.45722	73.8325	7.98579	4	82.9695	1.18612	4	74.8956	2.87334	4	70.5482	4.87116	4
	-7.36947	79.7619	81.875	81.2121	77.9762	74.8571	66.3507	59.375	50.3937	82.963	86.4865	87.6106	83.6207	78.8618	75	68.6131	68.1481			-7.36947	73.3107	7.65172	4	83.9235	2.15302	4	73.7674	2.6405	4	69.7748	4.88261	4
	-7.2817	79.1667	83.75	81.2121	78.5714	73.7143	66.8246	60.2679	50	82.2222	84.6847	85.8407	83.6207	78.8618	75.8065	65.6934	68.1481			-7.2817	73.5322	7.89987	4	83.1794	1.60147	4	73.8018	2.55458	4	69.0829	4.67893	4
	-7.19393	79.7619	81.25	79.3939	78.5714	72.5714	67.2986	58.9286	50.3937	82.963	83.7838	84.0708	82.7586	80.4878	75.8065	67.1533	68.1481			-7.19393	72.6999	7.44621	4	82.2962	1.27311	4	74.0411	2.77335	4	69.2982	5.00148	4
	-7.10592	78.5714	80.625	81.2121	79.7619	72.5714	67.2986	57.1429	50.7874	82.2222	83.7838	84.9558	81.8966	79.6748	77.4194	67.1533	66.6667			-7.10592	72.799	7.359	4	82.5995	1.13654	4	74.241	2.74792	4	68.2963	5.18244	4
	-7.01815	81.5476	81.25	79.3939	76.7857	72	66.3507	57.1429	49.6063	82.2222	81.982	85.8407	81.8966	82.1138	75.8065	67.8832	65.9259			-7.01815	72.9495	7.79563	4	81.6262	1.85724	4	74.0677	3.31148	4	68.2936	5.19711	4
	-6.93013	79.1667	80	79.3939	76.1905	73.7143	65.4028	57.1429	49.2126	82.2222	81.982	85.8407	79.3103	78.0488	77.4194	67.8832	65.1852			-6.93013	71.9433	7.57894	4	80.8309	2.04672	4	73.6463	2.90942	4	68.1084	5.22844	4
	-6.84237	77.9762	79.375	78.1818	76.1905	71.4286	64.9289	57.1429	50.3937	81.4815	82.8829	84.9558	79.3103	75.6098	75	66.4234	66.6667			-6.84237	71.4817	7.03609	4	80.8349	1.93801	4	71.7418	2.45103	4	67.9286	5.03215	4
	-6.75463	78.5714	79.375	78.1818	76.1905	72	67.2986	55.3571	50	81.4815	82.8829	84.0708	80.1724	78.0488	75	64.9635	66.6667			-6.75463	71.5321	7.18165	4	80.8291	1.74821	4	73.0868	2.29067	4	67.1172	5.39655	4
	-6.66687	77.381	81.25	77.5758	76.7857	70.8571	64.9289	54.0179	50.3937	80	82.8829	83.1858	78.4483	76.4228	73.3871	67.1533	62.963			-6.66687	71.6501	7.14113	4	80.3257	1.60145	4	71.399	2.43835	4	66.0335	5.40155	4
	-6.57912	76.1905	80	77.5758	76.1905	71.4286	65.8768	57.5893	51.5748	82.2222	80.1802	84.9558	78.4483	78.0488	72.5806	64.9635	66.6667			-6.57912	71.3353	6.63369	4	79.9437	1.85965	4	71.9837	2.49573	4	67.8604	5.17667	4
	-6.4911	77.9762	80	78.1818	78.5714	70.8571	64.455	55.8036	49.6063	78.5185	78.3784	83.1858	76.7241	73.9837	71.7742	64.2336	64.4444			-6.4911	71.4411	7.29245	4	79.2149	1.38703	4	70.2675	2.0456	4	65.75	4.70789	4
	-6.40332	78.5714	79.375	78.7879	75.5952	71.4286	65.4028	55.8036	49.2126	80.7407	78.3784	82.3009	79.3103	79.6748	74.1935	65.6934	63.7037			-6.40332	71.4867	7.42665	4	78.8962	1.38226	4	72.6749	2.96846	4	66.4854	5.20962	4
	-6.31557	77.381	78.75	76.9697	75	70.2857	65.4028	55.3571	49.2126	79.2593	82.8829	83.1858	75	76.4228	72.5806	68.6131	65.1852			-6.31557	70.5783	7.13206	4	79.0172	2.32014	4	71.173	2.3026	4	67.1037	4.93033	4
	-6.22782	75.5952	79.375	76.3636	74.4048	70.2857	64.455	54.0179	50	80.7407	81.982	81.4159	77.5862	76.4228	71.7742	66.4234	62.963			-6.22782	70.3335	6.82671	4	78.8472	1.77366	4	70.7344	2.46764	4	66.0362	5.55472	4
	-6.14005	76.1905	78.125	78.1818	74.4048	70.2857	64.9289	54.4643	50.3937	83.7037	79.2793	81.4159	73.2759	78.0488	70.9677	64.2336	61.4815			-6.14005	70.7228	6.79214	4	77.094	1.94218	4	71.0578	2.69322	4	65.9708	6.25851	4
	-6.05228	75	76.875	76.9697	76.1905	72	65.4028	55.8036	48.8189	82.963	80.1802	82.3009	76.7241	75.6098	70.9677	65.6934	65.1852			-6.05228	69.4159	6.88063	4	78.8489	1.45116	4	70.9951	2.11304	4	67.4113	5.66054	4
	-5.96452	75.5952	78.75	76.3636	74.4048	69.1429	65.4028	55.8036	48.0315	80.7407	78.3784	81.4159	77.5862	75.6098	71.7742	65.6934	64.4444			-5.96452	69.6851	7.24904	4	77.9463	1.4404	4	70.4824	2.15164	4	66.6705	5.17986	4
	-5.87677	74.4048	78.125	78.1818	74.4048	70.2857	64.455	57.1429	49.2126	81.4815	78.3784	82.3009	77.5862	75.6098	72.5806	67.1533	62.2222			-5.87677	69.981	6.97898	4	78.1676	1.62341	4	70.7328	2.35956	4	67	5.24188	4
	-5.78902	74.4048	76.875	77.5758	73.8095	70.8571	65.8768	54.9107	49.2126	80.7407	77.4775	79.646	77.5862	76.4228	72.5806	64.9635	61.4815			-5.78902	69.517	6.80222	4	77.1298	1.21397	4	71.4343	2.18743	4	65.5241	5.48367	4
	-5.70125	75	78.125	76.3636	73.8095	69.7143	64.9289	55.3571	48.4252	82.2222	79.2793	80.531	77.5862	78.0488	73.3871	65.6934	61.4815			-5.70125	69.4785	7.04684	4	77.8015	1.46105	4	71.5198	2.7811	4	66.1886	5.75036	4
	-5.61348	75	78.125	76.9697	73.8095	70.2857	65.8768	55.3571	49.2126	81.4815	78.3784	82.3009	77.5862	75.6098	71.7742	65.6934	62.2222			-5.61348	69.8268	6.90162	4	78.0187	1.74095	4	70.8866	2.01154	4	66.1886	5.5315	4
	-5.52568	76.1905	78.75	76.3636	73.2143	69.7143	65.8768	55.3571	48.8189	80.7407	78.3784	80.531	75	76.4228	71.7742	66.4234	62.2222			-5.52568	70.0308	7.09469	4	76.7809	1.64589	4	70.947	2.19649	4	66.1859	5.36091	4
	-5.43797	74.4048	77.5	75.7576	74.4048	70.2857	63.981	55.8036	48.4252	80.7407	80.1802	82.3009	73.2759	77.2358	71.7742	64.2336	62.2222			-5.43797	69.0219	6.89473	4	77.5404	2.19182	4	70.8192	2.72534	4	65.75	5.31036	4
	-5.3502	72.619	78.75	74.5455	73.2143	68.5714	64.9289	55.3571	47.6378	82.963	78.3784	80.531	72.4138	74.7967	70.9677	64.9635	63.7037			-5.3502	68.3881	7.03419	4	76.1344	1.97348	4	69.8162	2.07298	4	66.7468	5.8104	4
	-5.26218	75.5952	76.25	75.7576	73.2143	69.7143	64.455	54.0179	47.6378	80	79.2793	81.4159	75	76.4228	72.5806	64.9635	61.4815			-5.26218	68.8102	7.05882	4	77.2274	1.88901	4	70.7932	2.52032	4	65.1157	5.4615	4
	-5.17443	76.7857	76.875	75.1515	73.2143	68.5714	63.5071	54.4643	48.4252	80.7407	79.2793	81.4159	75	78.0488	72.5806	64.2336	64.4444			-5.17443	69.3094	6.97265	4	77.2274	1.88901	4	70.677	3.07961	4	65.9708	5.44594	4
	-5.08667	75	76.875	75.7576	73.2143	69.1429	64.455	54.4643	48.8189	81.4815	77.4775	81.4159	75	75.6098	70.9677	64.9635	62.2222			-5.08667	69.1129	6.77561	4	76.7769	1.77625	4	70.0438	2.30724	4	65.7829	5.68555	4
	-4.9989	75.5952	76.25	73.9394	73.8095	68	64.9289	54.4643	48.4252	80	80.1802	82.3009	75	76.4228	70.9677	64.2336	63.7037			-4.9989	68.5525	6.72668	4	77.8226	2.0348	4	70.0799	2.44743	4	65.6004	5.29801	4
	-4.91088	76.1905	80	75.1515	71.4286	68.5714	63.981	53.5714	46.8504	80.7407	76.5766	78.7611	75	78.8618	70.1613	63.5036	61.4815			-4.91088	69.5481	7.63734	4	75.4416	1.54398	4	70.3939	3.11188	4	64.8243	5.72188	4
	-4.82313	74.4048	76.875	77.5758	72.619	68	64.9289	54.4643	48.0315	81.4815	78.3784	78.7611	73.2759	76.4228	71.7742	64.9635	62.963			-4.82313	69.2218	7.09608	4	75.7586	1.63041	4	70.2815	2.4799	4	65.9681	5.6498	4
	-4.73537	73.8095	76.25	74.5455	73.2143	68.5714	63.981	54.9107	47.6378	82.2222	80.1802	80.531	72.4138	77.2358	69.3548	67.1533	61.4815			-4.73537	68.0607	6.82679	4	76.5848	2.18435	4	69.7858	2.75163	4	66.4419	5.82451	4
	-4.64735	73.8095	77.5	75.7576	73.8095	68.5714	64.455	53.5714	48.0315	79.2593	78.3784	81.4159	75	78.0488	71.7742	64.2336	62.2222			-4.64735	68.7746	6.95534	4	77.151	1.7197	4	70.7123	2.86777	4	64.8216	5.33944	4
	-4.5596	73.8095	76.25	74.5455	73.8095	68.5714	64.455	53.5714	48.0315	80.7407	77.4775	79.646	72.4138	77.2358	72.5806	64.9635	62.2222			-4.5596	68.1591	6.72864	4	75.8367	1.65904	4	70.7107	2.73532	4	65.3745	5.66818	4
	-4.47183	71.4286	77.5	73.3333	71.4286	68	63.0332	52.6786	48.4252	81.4815	78.3784	79.646	74.1379	78.0488	70.9677	66.4234	61.4815			-4.47183	67.6718	6.53957	4	75.8977	1.89898	4	70.0124	3.13921	4	65.5162	6.03322	4
	-4.3838	74.4048	77.5	75.1515	70.8333	67.4286	63.5071	53.5714	47.2441	80	79.2793	76.9912	75.8621	76.4228	70.1613	65.6934	61.4815			-4.3838	68.5751	7.14085	4	75.7415	1.78377	4	69.3799	2.71585	4	65.1866	5.54026	4
	-4.29605	73.8095	76.875	73.9394	72.0238	66.2857	63.5071	53.5714	48.4252	80	76.5766	81.4159	74.1379	78.0488	70.9677	65.6934	62.2222			-4.29605	68.2623	6.65013	4	76.0386	2.01941	4	69.7023	3.1796	4	65.3718	5.50194	4
	-4.20828	74.4048	76.25	75.7576	72.619	68	63.981	53.5714	47.6378	82.2222	78.3784	78.7611	74.1379	78.8618	70.9677	64.9635	61.4815			-4.20828	68.5125	6.96917	4	75.9741	1.53231	4	70.4526	3.14744	4	65.5597	6.04391	4
	-4.12055	73.8095	76.875	73.3333	71.4286	68	64.455	53.5714	46.8504	81.4815	77.4775	77.8761	75.8621	75.6098	70.1613	66.4234	60.7407			-4.12055	67.7171	6.99968	4	75.6611	1.47649	4	69.5565	2.33552	4	65.5543	5.92445	4
	-4.03278	73.2143	76.875	75.7576	71.4286	67.4286	62.5592	54.4643	47.2441	82.2222	77.4775	77.8761	73.2759	78.0488	70.1613	64.9635	61.4815			-4.03278	68.2727	7.05127	4	75.0145	1.58474	4	69.5495	3.24004	4	65.7829	5.8987	4
	-2.76583	83.9286	82.5	79.3939	77.9762	72.5714	68.7204	56.6964	51.5748	85.9259	86.4865	84.0708	81.8966	80.4878	74.1935	69.3431	67.4074			-2.76583	74.3493	7.65029	4	82.6075	1.80606	4	73.9933	2.45024	4	69.8432	6.03928	4
	-2.67823	84.5238	81.25	78.1818	77.381	72.5714	68.7204	57.5893	52.3622	85.9259	84.6847	84.0708	79.3103	78.8618	75	69.3431	67.4074			-2.67823	74.0795	7.35397	4	81.3617	1.78969	4	73.7884	2.12864	4	70.0664	5.87932	4
	-2.59022	85.119	83.125	80.6061	77.381	73.1429	68.2464	56.6964	52.3622	86.6667	86.4865	86.7257	79.3103	80.4878	73.3871	67.8832	65.9259			-2.59022	75.3031	7.7025	4	82.4759	2.41738	4	73.8161	2.51942	4	69.2931	6.28386	4
	-2.5022	86.3095	80	81.2121	76.7857	73.7143	68.2464	55.3571	51.5748	87.4074	84.6847	84.9558	81.0345	80.4878	75	68.6131	66.6667			-2.5022	74.7741	7.85298	4	81.8652	1.91469	4	74.3621	2.5125	4	69.5111	6.64273	4
	-2.41445	85.7143	80.625	79.3939	77.9762	72.5714	66.8246	56.6964	50.3937	86.6667	85.5856	85.8407	81.8966	80.4878	75	70.8029	68.1481			-2.41445	74.0317	7.9972	4	82.8248	1.85041	4	73.721	2.83294	4	70.5785	6.17453	4
	-2.32642	85.7143	83.125	80.6061	78.5714	75.4286	68.2464	55.8036	51.1811	88.8889	85.5856	84.9558	81.8966	81.3008	75	68.6131	66.6667			-2.32642	75.1566	8.05958	4	82.7523	1.60973	4	74.994	2.66918	4	69.9931	6.90026	4
	-2.23867	85.7143	82.5	81.2121	77.9762	72	67.7725	57.5893	51.1811	85.1852	82.8829	84.0708	81.0345	79.6748	75.8065	69.3431	69.6296			-2.23867	75.1519	8.04614	4	81.4911	1.32775	4	73.8134	2.55129	4	70.4368	5.65996	4
	-2.15063	82.7381	82.5	78.7879	79.1667	72.5714	68.2464	57.1429	50.7874	85.1852	83.7838	86.7257	80.1724	79.6748	72.5806	68.6131	68.1481			-2.15063	73.7033	7.69199	4	82.4621	1.73271	4	73.2683	2.3668	4	69.7723	5.78101	4
	-2.06288	83.9286	81.25	80	77.9762	73.1429	66.8246	57.1429	51.1811	85.1852	84.6847	85.8407	81.0345	79.6748	74.1935	70.073	67.4074			-2.06288	74.0899	7.68011	4	82.384	1.791	4	73.459	2.63455	4	69.9521	5.79233	4
	-1.97512	85.119	82.5	77.5758	77.381	73.1429	69.1943	56.25	51.5748	85.9259	83.7838	83.1858	81.8966	78.8618	75.8065	68.6131	66.6667			-1.97512	74.1924	7.69963	4	81.5618	1.44817	4	74.2514	2.05095	4	69.3639	6.15165	4
	-1.8871	84.5238	81.25	80.6061	78.5714	73.1429	67.7725	56.25	51.1811	85.1852	86.4865	82.3009	79.3103	80.4878	73.3871	67.8832	66.6667			-1.8871	74.3902	7.78378	4	81.6673	1.79735	4	73.6976	2.60796	4	68.9963	5.99454	4
	-1.79933	83.9286	81.25	78.7879	76.7857	72	67.7725	55.8036	51.1811	82.963	84.6847	84.9558	80.1724	79.6748	74.1935	69.3431	64.4444			-1.79933	73.7869	7.60802	4	81.6496	1.9575	4	73.4102	2.47708	4	68.1385	5.679	4
	-1.71158	85.119	81.25	80.6061	77.381	72.5714	67.7725	55.8036	50	86.6667	82.8829	82.3009	77.5862	79.6748	73.3871	67.8832	66.6667			-1.71158	74.2438	8.14247	4	80.0377	1.48001	4	73.3515	2.44471	4	69.255	6.4076	4
	-1.62357	83.3333	80.625	78.7879	77.381	70.8571	68.2464	54.9107	50	84.4444	84.6847	81.4159	80.1724	80.4878	74.1935	67.8832	66.6667			-1.62357	73.1866	7.78502	4	80.9135	1.51389	4	73.4462	2.64391	4	68.4763	6.07339	4
	-1.5358	83.9286	81.25	80	77.381	70.2857	67.2986	56.25	51.9685	84.4444	85.5856	85.8407	81.0345	78.8618	72.5806	69.3431	66.6667			-1.5358	74.2868	7.48441	4	82.4604	2.02129	4	72.2567	2.45289	4	69.176	5.82045	4
	-1.44778	82.1429	81.875	80.6061	77.381	70.8571	67.2986	55.3571	50.3937	86.6667	81.982	84.0708	78.4483	79.6748	74.1935	70.073	66.6667			-1.44778	73.7544	7.79411	4	80.4705	1.55138	4	73.006	2.63115	4	69.6909	6.47383	4
	-1.35977	83.9286	79.375	80	76.7857	72	67.2986	55.8036	50.7874	85.1852	84.6847	82.3009	80.1724	80.4878	73.3871	68.6131	66.6667			-1.35977	73.5227	7.64516	4	80.9859	1.67614	4	73.2934	2.72915	4	69.0671	6.06686	4
	-1.27175	84.5238	80	78.1818	73.2143	73.7143	66.3507	56.25	50	85.9259	84.6847	82.3009	81.8966	78.8618	74.1935	69.3431	66.6667			-1.27175	73.1764	7.83967	4	80.5241	2.51304	4	73.2801	2.58513	4	69.5464	6.14693	4
	-1.18373	82.1429	81.25	80	75.5952	72	67.7725	54.9107	51.1811	83.7037	86.4865	85.8407	80.1724	80.4878	72.5806	67.8832	65.1852			-1.18373	73.6435	7.50035	4	82.0237	2.56967	4	73.2102	2.65193	4	67.9207	5.95712	4
	-1.0957	78.5714	81.875	76.3636	75.5952	71.4286	66.8246	54.0179	50.7874	85.1852	83.7838	80.531	79.3103	79.6748	73.3871	67.8832	66.6667			-1.0957	71.8994	7.12785	4	79.8051	1.69126	4	72.8288	2.66443	4	68.4382	6.40218	4
	0	100	100	100	100	100	100	100	100	100	100	100	100	100	100	100	100			0	100	0	4	100	0	4	100	0	4	100	0	4
	0.0876167	100	99.375	101.818	100.595	101.143	96.6825	99.5536	95.6693	100.741	101.802	100	98.2759	99.187	97.5806	97.0803	107.407			0.087617	99.2156	1.29069	4	100.168	0.733725	4	98.6483	0.979695	4	101.195	2.20653	4
	0.17565	100.595	100	100	98.8095	99.4286	100.474	98.6607	99.2126	101.481	98.1982	100.885	100.862	100	97.5806	97.0803	104.444			0.17565	99.9519	0.283582	4	99.6887	0.695375	4	99.3708	0.633818	4	100.417	1.62202	4
	0.2634	98.8095	98.75	98.1818	99.4048	101.714	97.6303	98.2143	97.6378	102.963	100.901	100.885	98.2759	100.813	99.1935	100	104.444			0.2634	98.3448	0.274858	4	99.8666	0.635785	4	99.8378	0.901861	4	101.405	1.4089	4
	0.351167	100.595	98.125	98.1818	98.2143	99.4286	99.0521	96.875	98.0315	100	100	100.885	100	99.187	100	97.8102	102.222			0.351167	98.7334	0.62138	4	99.7748	0.560444	4	99.4169	0.209376	4	99.2269	1.19401	4
	0.439183	97.619	99.375	98.7879	98.8095	101.143	99.5261	98.2143	96.4567	101.481	99.0991	101.77	102.586	96.748	100	100	100			0.439183	98.0597	0.647049	4	100.566	0.947259	4	99.3542	0.93267	4	99.9239	0.66836	4
	0.526933	99.4048	100.625	101.212	98.8095	101.714	98.5782	99.1071	96.4567	100.741	98.1982	101.77	99.1379	100	98.3871	99.2701	105.185			0.526933	99.4246	1.0585	4	99.4789	0.788099	4	99.6699	0.770602	4	101.076	1.41821	4
	0.61495	100.595	101.25	100.606	97.619	98.2857	99.5261	99.1071	97.2441	103.704	101.802	101.77	99.1379	100.813	101.613	98.5401	100.741			0.61495	99.9238	0.906273	4	100.082	1.03135	4	100.059	0.730964	4	100.523	1.15832	4
	0.702717	97.619	100.625	98.1818	101.786	98.8571	97.1564	96.4286	97.6378	100.741	100	98.2301	99.1379	102.439	102.419	99.2701	105.185			0.702717	98.5159	0.715036	4	99.7884	0.757486	4	100.218	1.32301	4	100.406	1.82718	4
	0.790733	101.786	99.375	96.3636	99.4048	97.7143	98.5782	99.1071	93.7008	104.444	98.1982	101.77	100.862	101.626	100.806	97.0803	104.444			0.790733	97.8063	1.76146	4	100.059	0.788604	4	99.6812	0.918962	4	101.269	1.87939	4
	0.87875	100	100	97.5758	97.0238	97.7143	97.1564	98.2143	96.063	101.481	99.0991	100	100	100	99.1935	98.5401	101.481			0.87875	98.4097	0.968702	4	99.0307	0.701865	4	98.5161	0.655272	4	99.9294	0.898594	4
	0.9665	98.8095	100	96.3636	98.2143	98.2857	97.6303	97.3214	94.4882	102.222	100	97.3451	97.4138	101.626	100	97.8102	105.926			0.9665	97.4153	1.23486	4	98.2433	0.617902	4	99.3855	0.898499	4	100.82	2.02762	4
	1.05453	97.0238	99.375	96.9697	97.0238	96.5714	96.6825	97.7679	96.063	100	100	100	100	100	99.1935	97.0803	105.185			1.05453	97.3579	0.707566	4	99.256	0.744048	4	98.1119	0.873271	4	100.008	1.83469	4
	1.1423	99.4048	100	99.3939	98.2143	97.7143	98.1043	97.3214	96.063	100.741	99.0991	100.885	99.1379	99.187	99.1935	99.2701	102.963			1.1423	98.7154	0.89541	4	99.3341	0.559239	4	98.5498	0.378263	4	100.074	1.19072	4
	1.23032	98.8095	100	98.1818	95.8333	98.8571	97.6303	97.7679	95.6693	104.444	100	100.885	100.862	100.813	100	97.8102	103.704			1.23032	98.1652	0.913395	4	99.3951	1.20499	4	99.3251	0.692855	4	100.932	1.82064	4
	1.31833	98.8095	100	96.9697	97.619	98.2857	97.1564	96.4286	96.063	98.5185	97.2973	100	99.1379	97.561	100	98.5401	102.222			1.31833	97.9606	0.888005	4	98.5136	0.637624	4	98.2508	0.628124	4	98.9274	1.20475	4
	1.40608	101.19	97.5	98.1818	98.8095	97.1429	97.1564	98.2143	95.2756	100.741	99.0991	100.885	96.5517	99.187	99.1935	99.2701	104.444			1.40608	98.037	1.22063	4	98.8363	0.889113	4	98.17	0.58909	4	100.667	1.36141	4
	1.49385	96.4286	99.375	96.9697	97.0238	98.2857	99.5261	99.5536	94.8819	101.481	100.901	98.2301	100	100	100	98.5401	102.963			1.49385	96.9138	0.932056	4	99.0387	0.871087	4	99.4529	0.404797	4	100.635	0.987169	4
	1.58187	96.4286	100	97.5758	98.8095	100	98.1043	95.9821	95.6693	100.741	97.2973	99.115	98.2759	101.626	99.1935	98.5401	105.185			1.58187	97.4184	0.945541	4	98.3744	0.39872	4	99.731	0.741535	4	100.112	1.95062	4
	1.66962	98.2143	100	96.3636	99.4048	98.8571	97.6303	97.7679	96.063	98.5185	99.0991	101.77	97.4138	100.813	100.806	97.8102	104.444			1.66962	97.6602	0.913502	4	99.4219	0.896758	4	99.5267	0.781931	4	99.6352	1.61227	4
	1.75765	97.0238	99.375	95.1515	99.4048	99.4286	96.6825	96.875	96.063	100.741	99.0991	102.655	103.448	102.439	100.806	102.19	103.704			1.75765	96.9033	0.908234	4	101.152	1.11052	4	99.8391	1.21889	4	100.877	1.46482	4
	1.84542	96.4286	100.625	98.7879	96.4286	97.7143	97.1564	98.2143	94.0945	100.741	99.0991	99.115	98.2759	102.439	99.1935	97.0803	103.704			1.84542	97.484	1.41918	4	98.2296	0.631525	4	99.1258	1.18507	4	99.9347	1.4709	4
	1.93317	97.0238	98.75	96.3636	96.4286	99.4286	98.5782	96.875	95.6693	100	98.1982	100	97.4138	100.813	99.1935	98.5401	101.481			1.93317	96.9517	0.660143	4	98.0101	0.75564	4	99.5033	0.471933	4	99.2242	0.986743	4
	2.0212	98.8095	98.75	98.7879	100.595	98.2857	96.6825	97.7679	95.2756	100.741	98.1982	99.115	96.5517	101.626	100.806	99.2701	103.704			2.0212	97.9057	0.876805	4	98.615	0.846664	4	99.3502	1.13835	4	100.371	1.26596	4
	2.1092	96.4286	99.375	99.3939	95.2381	97.1429	98.5782	97.7679	94.8819	102.222	98.1982	99.115	97.4138	102.439	101.613	98.5401	105.926			2.1092	97.5199	1.12189	4	97.4913	0.827605	4	99.9432	1.24907	4	101.114	1.87536	4
	2.19697	100	98.125	98.1818	96.4286	98.2857	98.1043	97.3214	96.4567	99.2593	99.0991	99.115	101.724	103.252	101.613	100.73	103.704			2.19697	98.1909	0.723691	4	99.0917	1.08099	4	100.314	1.26872	4	100.254	1.34525	4
	2.28473	97.619	98.75	98.7879	98.2143	97.1429	97.6303	96.875	94.4882	103.704	98.1982	100	100	100	101.613	99.2701	102.963			2.28473	97.4113	1.01139	4	99.1031	0.517823	4	99.0965	1.04542	4	100.703	1.60257	4
	2.37247	98.2143	98.75	97.5758	100	99.4286	97.1564	99.5536	94.8819	100.741	98.1982	97.3451	100	100.813	99.1935	99.2701	106.667			2.37247	97.3555	0.85875	4	98.8858	0.666417	4	99.1479	0.753851	4	101.558	1.73251	4
	2.46025	97.0238	98.125	96.9697	95.8333	98.2857	98.1043	99.1071	94.0945	100	100.901	97.3451	98.2759	102.439	100	102.92	102.963			2.46025	96.5533	0.861721	4	98.0888	1.06392	4	99.7072	1.00575	4	101.247	0.994845	4
	2.54827	97.619	98.75	94.5455	96.4286	97.7143	99.0521	96.875	95.2756	103.704	98.1982	96.4602	100	102.439	101.613	100	103.704			2.54827	96.5475	0.984259	4	97.7717	0.850064	4	100.205	1.09946	4	101.071	1.64863	4
	2.63628	98.8095	98.125	97.5758	98.2143	99.4286	95.7346	97.7679	96.8504	100	98.1982	100.885	98.2759	100.813	103.226	100	102.963			2.63628	97.8402	0.415366	4	98.8933	0.664098	4	99.8005	1.56599	4	100.183	1.06569	4
	2.7238	97.619	100	98.1818	97.619	100	98.5782	97.3214	94.8819	102.222	99.0991	98.2301	98.2759	103.252	100	98.5401	102.963			2.7238	97.6707	1.05936	4	98.306	0.303806	4	100.458	0.989933	4	100.262	1.37688	4
	2.81182	97.619	98.75	96.3636	97.0238	98.8571	96.2085	98.2143	94.8819	100	100	100	99.1379	103.252	98.3871	100.73	104.444			2.81182	96.9036	0.831661	4	99.0404	0.702247	4	99.1762	1.47602	4	100.847	1.31033	4
	2.89982	98.8095	97.5	96.9697	96.4286	99.4286	95.7346	96.4286	94.0945	104.444	100	100	98.2759	100	101.613	100	104.444			2.89982	96.8434	0.994535	4	98.6761	0.852301	4	99.194	1.24242	4	101.329	1.94062	4
	2.98758	99.4048	100	97.5758	97.0238	98.2857	97.6303	98.6607	95.2756	100.741	100	94.6903	99.1379	100.813	100.806	100	104.444			2.98758	98.064	1.06299	4	97.713	1.18577	4	99.3839	0.834024	4	100.961	1.23819	4
	3.07535	97.619	99.375	98.1818	98.2143	98.8571	96.2085	95.5357	95.2756	99.2593	102.703	100.885	99.1379	104.065	100	102.19	105.185			3.07535	97.6129	0.8608	4	100.235	0.991584	4	99.7827	1.63342	4	100.542	2.06121	4
	3.16337	95.8333	96.875	97.5758	97.619	99.4286	96.2085	96.4286	95.2756	103.704	100.901	99.115	99.1379	102.439	100.806	100.73	104.444			3.16337	96.3899	0.515836	4	99.1932	0.671029	4	99.7207	1.32252	4	101.327	1.8193	4
	3.25112	98.8095	98.75	96.3636	97.619	100.571	95.7346	95.9821	95.2756	101.481	99.0991	98.2301	101.724	101.626	100.806	100	101.481			3.25112	97.2997	0.882995	4	99.1681	0.904494	4	99.6846	1.33593	4	99.7363	1.29919	4
	3.33913	97.619	101.875	95.7576	97.619	98.8571	95.2607	97.7679	95.6693	102.222	96.3964	100	101.724	101.626	100	101.46	106.667			3.33913	97.7302	1.45288	4	98.9349	1.19337	4	98.936	1.35039	4	102.029	1.82635	4
	3.42688	98.8095	98.75	95.7576	97.0238	99.4286	97.1564	99.1071	93.3071	102.222	99.0991	99.115	99.1379	102.439	101.613	101.46	104.444			3.42688	96.656	1.32429	4	98.594	0.523447	4	100.159	1.18537	4	101.808	1.10068	4
	3.51467	95.8333	100.625	97.5758	97.619	98.8571	95.2607	96.875	94.4882	102.222	97.2973	100.885	98.2759	104.065	100	101.46	105.926			3.51467	97.1306	1.32521	4	98.5193	0.814429	4	99.5457	1.81352	4	101.621	1.85841	4
	3.60242	95.8333	98.75	96.3636	96.4286	98.2857	97.1564	96.875	94.8819	100.741	100	99.115	99.1379	100	101.613	97.8102	104.444			3.60242	96.4572	0.823433	4	98.6704	0.77513	4	99.2638	0.977158	4	99.9676	1.70435	4
	3.69017	96.4286	98.75	96.9697	96.4286	100	97.6303	95.9821	95.6693	102.222	100.901	100	98.2759	104.065	100	98.5401	104.444			3.69017	96.9544	0.655262	4	98.9013	0.98789	4	100.424	1.33607	4	100.297	1.88441	4
	3.7782	97.0238	98.125	98.7879	94.6429	97.7143	97.6303	97.3214	94.4882	103.704	100	98.2301	98.2759	101.626	100.806	100.73	104.444			3.7782	97.1062	0.945461	4	97.7872	1.12614	4	99.4443	1.03677	4	101.55	1.62197	4
	3.86622	95.8333	97.5	96.3636	99.4048	98.2857	95.2607	97.7679	93.7008	102.222	99.0991	96.4602	100.862	101.626	99.1935	99.2701	103.704			3.86622	95.8494	0.796121	4	98.9565	0.916706	4	98.5915	1.31525	4	100.741	1.35323	4
	3.95398	95.2381	97.5	98.7879	98.2143	99.4286	96.6825	97.7679	94.4882	97.037	99.0991	100	99.1379	103.252	103.226	97.8102	104.444			3.95398	96.5035	0.994741	4	99.1128	0.364607	4	100.647	1.59787	4	99.2649	1.7356	4
	4.042	95.8333	100	97.5758	98.2143	100	97.1564	98.2143	94.0945	99.2593	100	98.2301	102.586	100	102.419	100	105.926			4.042	96.8759	1.26072	4	99.7576	1.03178	4	99.894	1.07605	4	100.85	1.7312	4
	4.12977	100	99.375	96.9697	94.6429	99.4286	96.6825	95.5357	95.2756	101.481	99.0991	98.2301	99.1379	102.439	102.419	100	108.148			4.12977	97.9051	1.0931	4	97.7775	1.06568	4	100.242	1.38142	4	101.291	2.61161	4
	4.21777	98.8095	98.75	95.1515	97.0238	99.4286	97.1564	97.3214	94.0945	102.963	100.901	101.77	100.862	106.504	100.806	97.8102	107.407			4.21777	96.7014	1.21926	4	100.139	1.05939	4	100.974	1.99107	4	101.376	2.38136	4
	4.30553	95.2381	98.75	94.5455	97.0238	98.2857	96.6825	95.5357	94.8819	100.741	96.3964	100.885	97.4138	100	101.613	100.73	103.704			4.30553	95.8539	0.975681	4	97.9297	1.00712	4	99.1453	1.06552	4	100.178	1.6981	4
	4.39357	97.0238	98.125	97.5758	100.595	99.4286	95.2607	95.9821	94.8819	101.481	96.3964	97.3451	100.862	103.252	101.613	100.73	105.926			4.39357	96.9016	0.709775	4	98.7997	1.1317	4	99.8885	1.73001	4	101.03	2.03602	4
	4.48132	97.0238	97.5	96.3636	95.8333	97.1429	97.6303	98.6607	95.2756	102.222	96.3964	97.3451	100.862	102.439	103.226	100.73	105.185			4.48132	96.5408	0.481794	4	97.6092	1.12826	4	100.109	1.58338	4	101.7	1.37228	4
	4.56933	97.0238	96.25	96.3636	97.0238	98.8571	95.2607	96.4286	94.0945	102.963	98.1982	100	100	104.878	101.613	101.46	104.444			4.56933	95.933	0.636129	4	98.8055	0.730119	4	100.152	2.04269	4	101.324	1.74181	4
	4.65735	98.2143	97.5	95.1515	97.619	98.2857	96.6825	96.875	91.7323	102.963	100.901	100.885	100.862	104.878	101.613	100	106.667			4.65735	95.6495	1.46045	4	100.067	0.815943	4	100.365	1.82138	4	101.626	2.0899	4
	4.74512	97.0238	97.5	94.5455	96.4286	100.571	95.2607	96.875	94.0945	102.222	97.2973	100	100	99.187	101.613	98.5401	104.444			4.74512	95.7909	0.85975	4	98.4315	0.922791	4	99.158	1.39087	4	100.52	1.72008	4
	4.83288	96.4286	97.5	94.5455	98.8095	98.2857	95.2607	98.2143	95.6693	100	95.4955	97.3451	97.4138	104.878	103.226	102.19	103.704			4.83288	96.0358	0.622737	4	97.266	0.679781	4	100.413	2.21585	4	101.027	1.20702	4
	4.92063	95.8333	99.375	95.1515	97.619	98.8571	96.6825	95.9821	95.6693	101.481	100	100.885	96.5517	102.439	100.806	97.0803	108.148			4.92063	96.5073	0.966882	4	98.7639	1.0096	4	99.6963	1.24306	4	100.673	2.76047	4
	5.0084	96.4286	98.125	96.3636	97.619	97.7143	96.2085	99.5536	94.8819	102.963	100	100	100.862	100	100	100	107.407			5.0084	96.4498	0.662854	4	99.6203	0.697341	4	98.4807	0.929457	4	102.481	1.80801	4
	5.09615	96.4286	96.25	96.3636	97.0238	97.1429	94.7867	98.2143	93.3071	102.963	96.3964	101.77	100	101.626	99.1935	100.73	105.926			5.09615	95.5873	0.760973	4	98.7975	1.26466	4	98.1873	1.45751	4	101.958	1.64007	4
	5.1839	95.2381	100.625	94.5455	97.0238	98.2857	96.2085	97.3214	94.8819	101.481	100	99.115	99.1379	101.626	96.7742	101.46	108.148			5.1839	96.3226	1.44108	4	98.8192	0.632905	4	98.2236	1.21592	4	102.103	2.23991	4
	5.27167	95.8333	99.375	95.1515	95.8333	98.8571	94.7867	96.4286	94.0945	100	100.901	98.2301	98.2759	102.439	101.613	98.5401	105.926			5.27167	96.1136	1.14447	4	98.31	1.03498	4	99.4239	1.72499	4	100.224	2.03721	4
	5.35943	95.8333	98.125	95.7576	96.4286	97.1429	98.1043	97.3214	92.9134	102.963	98.1982	96.4602	100	100.813	101.613	97.8102	103.704			5.35943	95.6573	1.06691	4	97.7717	0.850064	4	99.4183	1.06715	4	100.45	1.67477	4
	5.44718	98.8095	97.5	96.3636	100	99.4286	97.1564	97.3214	93.7008	102.222	98.1982	97.3451	99.1379	104.065	101.613	98.5401	108.148			5.44718	96.5935	1.08601	4	98.6703	0.574872	4	100.566	1.47925	4	101.558	2.43116	4
	5.53522	95.8333	98.75	95.1515	97.0238	97.7143	96.2085	96.875	94.4882	102.963	100.901	96.4602	101.724	101.626	101.613	98.5401	109.63			5.53522	96.0558	0.939119	4	99.0272	1.33502	4	99.2904	1.37934	4	102.002	2.8486	4
	5.62302	96.4286	96.875	95.1515	97.619	98.2857	96.6825	98.2143	96.4567	102.222	98.1982	101.77	98.2759	104.878	100.806	99.2701	106.667			5.62302	96.2279	0.373044	4	98.9658	0.94613	4	100.163	1.78614	4	101.593	1.89187	4
	5.71078	96.4286	99.375	95.1515	97.619	98.2857	95.2607	97.3214	92.9134	104.444	98.1982	100	99.1379	102.439	103.226	102.19	109.63			5.71078	95.9671	1.34836	4	98.7388	0.524088	4	99.8028	1.86188	4	103.396	2.55461	4
	5.79853	97.619	100	96.3636	96.4286	96.5714	96.6825	95.0893	94.4882	102.222	99.0991	99.115	99.1379	100.813	101.613	99.2701	105.185			5.79853	97.1177	1.15621	4	98.4452	0.672244	4	98.9199	1.33409	4	100.442	2.1543	4
	5.8863	94.6429	99.375	93.3333	97.619	100	94.7867	96.875	96.063	102.963	99.0991	98.2301	99.1379	103.252	104.032	100.73	106.667			5.8863	95.8535	1.29942	4	98.5215	0.366622	4	100.518	2.10041	4	101.809	2.05016	4
	5.97405	94.0476	96.875	95.1515	95.8333	97.1429	97.6303	96.875	92.9134	101.481	97.2973	98.2301	100	102.439	102.419	99.2701	108.148			5.97405	94.7469	0.843765	4	97.8402	0.872688	4	99.9079	1.45908	4	101.444	2.42467	4
	6.06207	97.619	100	95.1515	97.0238	97.7143	95.7346	96.875	95.6693	103.704	100.901	101.77	101.724	103.252	101.613	99.2701	108.889			6.06207	97.11	1.1001	4	100.355	1.1281	4	99.5784	1.72926	4	102.184	2.64483	4
	6.14983	94.6429	96.875	98.7879	98.8095	97.7143	96.2085	96.875	93.7008	100	100.901	96.4602	101.724	101.626	101.613	101.46	108.889			6.14983	96.0016	1.14259	4	99.4737	1.17699	4	99.2904	1.37934	4	101.806	2.54728	4
	6.2376	97.0238	98.125	95.7576	97.619	96	95.2607	98.6607	94.0945	101.481	100	97.3451	100	101.626	101.613	97.0803	109.63			6.2376	96.2502	0.866175	4	98.741	0.729005	4	98.6249	1.73549	4	101.713	2.79142	4
	6.32562	97.0238	96.875	96.3636	97.619	99.4286	96.6825	95.0893	92.9134	101.481	98.1982	100	99.1379	101.626	100	101.46	106.667			6.32562	95.794	0.970541	4	98.7388	0.524088	4	99.4343	1.0286	4	101.174	2.36942	4
	6.41363	95.8333	96.875	94.5455	95.8333	97.1429	95.2607	96.875	94.0945	102.963	99.0991	97.3451	100.862	104.065	104.032	97.8102	106.667			6.41363	95.3371	0.63128	4	98.2849	1.08774	4	100.125	2.29756	4	101.079	2.29366	4
	6.50138	95.8333	96.875	95.7576	94.6429	96	94.7867	99.5536	92.5197	105.926	100	99.115	100	101.626	99.1935	101.46	108.889			6.50138	95.2464	0.943976	4	98.4395	1.28261	4	97.9016	1.55077	4	103.957	2.1179	4
	6.58915	95.8333	98.75	95.1515	95.8333	98.2857	98.1043	95.9821	94.0945	102.222	98.1982	99.115	100.862	102.439	103.226	100	107.407			6.58915	95.9573	0.997241	4	98.5022	1.04722	4	100.514	1.34881	4	101.403	2.38184	4
	6.67692	97.0238	97.5	95.1515	98.2143	96	96.2085	95.5357	95.2756	100.741	97.2973	98.2301	99.1379	104.878	103.226	101.46	108.148			6.67692	96.2377	0.599779	4	98.2199	0.375733	4	100.078	2.31933	4	101.471	2.58755	4
	6.76492	95.2381	95.625	95.7576	96.4286	98.8571	97.1564	97.7679	92.9134	100.741	98.1982	96.4602	98.2759	100	103.226	102.19	108.148			6.76492	94.8835	0.66589	4	97.3407	0.517778	4	99.8098	1.27976	4	102.212	2.18237	4
	6.85268	95.2381	98.125	95.7576	95.2381	98.8571	93.8389	95.9821	94.0945	102.963	100	99.115	100.862	102.439	101.613	100.73	108.148			6.85268	95.8038	0.848128	4	98.8038	1.24092	4	99.187	1.94019	4	101.956	2.52564	4
	6.94045	95.2381	96.875	96.9697	97.619	97.7143	96.2085	96.875	95.6693	100.741	100	98.2301	99.1379	104.065	100.806	102.19	109.63			6.94045	96.188	0.433435	4	98.7468	0.521401	4	99.6986	1.74191	4	102.359	2.67057	4
	7.02822	96.4286	96.25	95.1515	96.4286	96	95.2607	95.5357	93.7008	102.963	99.0991	99.115	95.6897	102.439	100.806	100.73	108.148			7.02822	95.3827	0.627715	4	97.5831	0.892709	4	98.6265	1.76812	4	101.844	2.61454	4
	7.11598	96.4286	97.5	96.3636	98.8095	97.7143	97.1564	98.6607	95.6693	101.481	96.3964	100	97.4138	103.252	97.5806	100.73	108.148			7.11598	96.4904	0.377867	4	98.1549	0.789224	4	98.9258	1.44695	4	102.255	2.05288	4
	7.20373	94.6429	98.125	93.9394	98.8095	97.1429	96.2085	98.2143	92.9134	100.741	97.2973	100	100	104.065	100	102.92	109.63			7.20373	94.9052	1.13049	4	99.0267	0.641133	4	99.3541	1.76527	4	102.876	2.44786	4
	7.29148	95.8333	96.875	95.1515	96.4286	97.7143	97.1564	95.9821	94.8819	102.222	99.0991	99.115	96.5517	100.813	102.419	100.73	108.889			7.29148	95.6854	0.444193	4	97.7986	0.755866	4	99.5258	1.25583	4	101.956	2.66656	4
	7.37925	95.8333	97.5	95.7576	96.4286	98.2857	95.2607	98.2143	94.0945	102.222	97.2973	101.77	100.862	104.065	99.1935	102.92	108.889			7.37925	95.7964	0.695319	4	99.0895	1.31083	4	99.2012	1.82626	4	103.061	2.20187	4
	7.46703	96.4286	98.125	95.1515	97.0238	96	95.2607	95.5357	94.0945	100.741	97.2973	99.115	98.2759	102.439	100.806	100.73	108.148			7.46703	95.9499	0.867955	4	97.928	0.478314	4	98.6265	1.76812	4	101.289	2.59424	4
	7.55503	94.6429	96.25	94.5455	95.2381	96.5714	97.6303	95.9821	93.7008	101.481	100	99.115	100	102.439	102.419	104.38	108.889			7.55503	94.7848	0.532238	4	98.5883	1.13604	4	99.765	1.55327	4	102.683	2.70396	4
	7.64278	97.619	97.5	96.3636	98.2143	99.4286	94.7867	96.875	94.0945	102.222	99.0991	99.115	100	101.626	100.806	99.2701	105.926			7.64278	96.3943	0.817142	4	99.1071	0.364521	4	99.162	1.52724	4	101.073	1.95246	4
	7.73055	96.4286	98.125	92.1212	96.4286	97.1429	96.6825	97.7679	94.0945	102.222	99.0991	98.2301	100	104.065	103.226	100	108.148			7.73055	95.1923	1.31548	4	98.4394	0.761464	4	100.279	1.95337	4	102.035	2.23149	4
	7.8183	94.6429	97.5	97.5758	96.4286	99.4286	96.2085	97.7679	92.126	102.222	98.1982	100	100.862	100.813	102.419	102.92	107.407			7.8183	95.4612	1.30453	4	98.8722	0.985615	4	99.7174	1.31962	4	102.579	1.97281	4
	7.90607	95.8333	96.875	94.5455	96.4286	97.1429	95.7346	96.4286	94.0945	100	100	99.115	99.1379	100.813	101.613	101.46	108.889			7.90607	95.3371	0.63128	4	98.6704	0.77513	4	98.8258	1.41729	4	101.694	2.62068	4
	7.99383	96.4286	95.625	95.7576	96.4286	97.1429	97.1564	95.9821	95.6693	100	100.935	97.3684	99.1228	103.226	100.781	102.92	102.878			7.99383	95.8701	0.188182	4	98.4636	0.995036	4	99.5766	1.4874	4	100.445	1.637	4
	8.08158	95.8333	99.375	95.1515	97.0238	98.8571	96.6825	95.9821	93.3071	100	100.935	99.1228	103.509	102.419	95.3125	100.73	107.914			8.08158	95.9167	1.27025	4	100.148	1.37614	4	98.3179	1.54974	4	101.156	2.48249	4
	8.1696	95.2381	95.625	95.1515	98.2143	98.8571	95.7346	95.9821	94.0945	102.19	104.673	97.3684	103.509	103.226	98.4375	101.46	104.317			8.1696	95.0273	0.327522	4	100.941	1.84208	4	99.0638	1.55029	4	100.987	1.77493	4
	8.25737	97.0238	98.75	95.1515	95.2381	96.5714	95.7346	96.875	94.0945	99.2701	102.804	95.614	100.877	101.613	96.875	102.92	102.878			8.25737	96.255	1.02882	4	98.6333	1.89452	4	97.6985	1.3269	4	100.486	1.47651	4
	8.34512	97.0238	95.625	94.5455	97.0238	98.2857	98.1043	96.4286	96.063	100.73	101.869	96.4912	100.877	103.226	99.2188	99.2701	106.475			8.34512	95.8143	0.514018	4	99.0654	1.35211	4	99.7086	1.19754	4	100.726	2.11417	4
	8.43315	97.619	98.125	96.9697	97.619	99.4286	98.1043	95.5357	93.7008	98.5401	101.869	99.1228	101.754	100	98.4375	100.73	105.755			8.43315	96.6036	0.996081	4	100.091	1.0399	4	98.9926	0.438006	4	100.14	2.15329	4
	8.5209	94.6429	97.5	95.1515	97.0238	98.8571	94.7867	96.4286	94.4882	102.19	100	99.1228	102.632	103.226	98.4375	100.73	103.597			8.5209	95.4456	0.699289	4	99.6946	1.16115	4	98.8268	1.72786	4	100.736	1.55063	4
	8.60867	97.619	95.625	94.5455	95.2381	97.7143	95.7346	96.875	92.5197	100.73	102.804	98.2456	102.632	105.645	99.2188	101.46	104.317			8.60867	95.0773	1.06398	4	99.7298	1.83138	4	99.5782	2.14447	4	100.845	1.53307	4
	8.69642	97.619	96.25	95.1515	96.4286	95.4286	95.2607	95.9821	94.0945	103.65	101.869	99.1228	104.386	100.806	97.6562	102.19	102.878			8.69642	95.7788	0.754924	4	100.452	1.71852	4	97.288	1.29367	4	101.175	1.75638	4
	8.78418	98.8095	96.25	93.9394	97.0238	96	95.2607	94.6429	93.7008	100	101.869	98.2456	101.754	100.806	99.2188	101.46	107.194			8.78418	95.6749	1.19254	4	99.7233	1.23157	4	97.8215	1.31461	4	100.824	2.57988	4
	8.87195	97.0238	96.875	96.9697	96.4286	97.7143	93.3649	93.3036	93.7008	100.73	101.869	97.3684	100.877	99.1935	98.4375	101.46	105.755			8.87195	96.1423	0.814426	4	99.1358	1.32151	4	97.1776	1.30626	4	100.312	2.58588	4
	8.9597	94.6429	95.625	94.5455	96.4286	97.1429	95.2607	95.9821	93.7008	100.73	100.935	97.3684	99.1228	100.806	98.4375	102.19	105.755			8.9597	94.6285	0.393781	4	98.4636	0.995036	4	97.9119	1.1646	4	101.164	2.0243	4
	9.04747	94.0476	96.875	93.9394	97.0238	101.143	95.7346	96.4286	95.2756	100.73	101.869	97.3684	102.632	102.419	97.6562	101.46	103.597			9.04747	95.0344	0.684273	4	99.7233	1.46901	4	99.2383	1.5418	4	100.554	1.50364	4
	9.13522	97.619	96.25	93.9394	97.619	98.2857	94.7867	95.9821	94.0945	99.2701	100.935	99.1228	100	100	100	100.73	104.317			9.13522	95.4757	0.887951	4	99.4191	0.704873	4	98.2681	1.22879	4	100.075	1.72768	4
	9.22298	95.8333	96.875	93.3333	96.4286	97.7143	95.7346	95.5357	94.0945	100.73	100	96.4912	101.754	105.645	99.2188	101.46	104.317			9.22298	95.034	0.806389	4	98.6685	1.32456	4	99.5782	2.14447	4	100.511	1.82993	4
	9.31073	97.0238	96.25	93.3333	94.6429	96.5714	97.1564	95.9821	94.0945	100.73	99.0654	100	100.877	104.032	100	103.65	103.597			9.31073	95.1754	0.8724	4	98.6464	1.38482	4	99.44	1.70407	4	100.99	1.80316	4
	9.3985	97.0238	97.5	96.3636	97.619	97.1429	96.2085	94.1964	93.7008	97.0803	102.804	97.3684	100.877	102.419	99.2188	100.73	106.475			9.3985	96.1471	0.848051	4	99.6671	1.31596	4	98.7474	1.37617	4	99.6204	2.6471	4
	9.48627	97.0238	95	96.3636	95.2381	96.5714	94.7867	97.7679	93.7008	99.2701	99.0654	97.3684	100.877	101.613	98.4375	102.92	103.597			9.48627	95.5221	0.738979	4	98.1373	1.20295	4	97.8521	1.45839	4	100.889	1.4089	4
	9.57402	94.6429	96.875	93.9394	95.2381	97.7143	95.7346	96.4286	93.3071	100	103.738	97.3684	100	103.226	97.6562	101.46	105.755			9.57402	94.6911	0.777405	4	99.0862	1.83111	4	98.5827	1.61458	4	100.911	1.92984	4
	9.66178	95.8333	99.375	95.7576	97.0238	98.2857	96.6825	95.5357	94.4882	100.73	101.869	98.2456	99.1228	100.806	96.875	102.92	105.036			9.66178	96.3635	1.05016	4	99.0654	1.02895	4	98.1624	0.951056	4	101.055	2.03907	4
	9.74953	95.2381	95.625	93.9394	95.8333	98.8571	94.7867	95.0893	94.8819	100.73	100	98.2456	101.754	100	99.2188	100	107.194			9.74953	94.9211	0.3607	4	98.9583	1.26414	4	98.2157	1.16759	4	100.753	2.48553	4
	9.83728	98.2143	98.75	94.5455	97.619	98.2857	96.6825	95.5357	94.8819	100.73	100	100.877	102.632	101.613	100	100	105.036			9.83728	96.5979	1.0955	4	100.282	1.04266	4	99.1453	1.06552	4	100.325	1.94509	4
	9.92505	98.8095	96.25	95.7576	95.2381	96	96.2085	95.5357	92.5197	102.92	103.738	97.3684	102.632	103.226	99.2188	100	105.755			9.92505	95.8342	1.29155	4	99.7441	2.04612	4	98.6633	1.68928	4	101.053	2.18225	4
	10.0128	97.0238	96.875	97.5758	97.619	99.4286	95.2607	95.9821	92.9134	102.19	99.0654	100.877	100.877	100.806	97.6562	100	106.475			10.0128	96.097	1.07185	4	99.6097	0.789094	4	98.288	1.19748	4	101.162	2.18829	4
	10.1006	97.0238	95	94.5455	97.0238	97.1429	96.2085	95.9821	96.063	101.46	101.869	97.3684	100.877	100	96.875	100	106.475			10.1006	95.6581	0.555292	4	99.2847	1.22473	4	97.5566	0.837817	4	100.979	2.16722	4
	10.1886	96.4286	95.625	94.5455	97.0238	97.1429	95.7346	96.4286	92.126	101.46	103.738	96.4912	103.509	102.419	98.4375	103.65	106.475			10.1886	94.6813	0.935042	4	100.191	1.98558	4	98.4336	1.43867	4	102.003	2.12284	4
	10.2764	101.19	98.125	96.3636	97.619	98.8571	94.7867	97.3214	94.8819	100.73	103.738	99.1228	103.509	100.806	97.6562	100.73	106.475			10.2764	97.6403	1.35639	4	100.997	1.54777	4	98.0267	1.26001	4	101.314	1.89861	4
	10.3641	96.4286	96.25	93.9394	95.8333	96.5714	97.1564	95.5357	92.9134	102.19	100	96.4912	102.632	104.839	97.6562	102.92	105.755			10.3641	94.8828	0.867335	4	98.739	1.58739	4	99.0557	1.94037	4	101.6	2.1628	4
	10.4519	95.8333	97.5	95.1515	97.619	94.8571	95.2607	97.3214	94.4882	100.73	100.935	97.3684	103.509	104.839	97.6562	105.839	107.194			10.4519	95.7433	0.646761	4	99.8577	1.4634	4	98.1532	2.31253	4	102.771	2.28844	4
	10.5396	98.2143	94.375	95.1515	95.8333	97.7143	95.7346	99.1071	94.0945	102.19	101.869	92.9825	102.632	103.226	99.2188	102.19	107.194			10.5396	95.4588	0.9453	4	98.3291	2.34271	4	98.9734	1.58688	4	102.67	1.67391	4
	10.6274	98.2143	96.25	94.5455	95.2381	100	95.2607	96.4286	94.4882	100.73	103.738	98.2456	102.632	104.032	97.6562	101.46	107.914			10.6274	95.8745	0.880523	4	99.9634	1.97164	4	99.2373	1.86831	4	101.633	2.36958	4
	10.7151	97.0238	95.625	94.5455	98.2143	100.571	97.1564	96.875	95.6693	100	100	98.2456	101.754	104.839	97.6562	101.46	103.597			10.7151	95.7159	0.507528	4	99.5536	0.843968	4	100.056	1.7632	4	100.483	1.41135	4
	10.8029	97.619	95.625	95.7576	97.619	94.2857	98.5782	97.7679	92.9134	98.5401	103.738	98.2456	100.877	104.032	100	102.92	105.036			10.8029	95.4788	0.968723	4	100.12	1.39742	4	99.2241	2.01092	4	101.066	1.74296	4
	10.8907	96.4286	96.875	96.9697	97.0238	97.1429	96.2085	96.875	92.126	100	101.869	97.3684	100.877	104.839	99.2188	102.19	106.475			10.8907	95.5998	1.16394	4	99.2847	1.22473	4	99.3522	1.93398	4	101.385	2.01685	4
	10.9784	95.2381	97.5	95.7576	98.2143	98.2857	96.6825	99.1071	94.0945	99.2701	102.804	97.3684	102.632	103.226	98.4375	102.19	108.633			10.9784	95.6475	0.70848	4	100.255	1.43297	4	99.1579	1.4129	4	102.3	2.22664	4
	11.0662	98.2143	94.375	94.5455	92.8571	99.4286	95.2607	98.2143	93.3071	99.2701	104.673	95.614	100	101.613	96.875	103.65	104.317			11.0662	95.1105	1.07028	4	98.286	2.5875	4	98.2943	1.39991	4	101.363	1.53423	4
	11.1539	96.4286	96.25	93.9394	97.0238	97.7143	95.2607	96.875	94.0945	102.92	100.935	99.1228	102.632	104.032	97.6562	103.65	107.194			11.154	95.1781	0.672139	4	99.9282	1.20434	4	98.6659	1.87792	4	102.66	2.14227	4
	11.2417	98.2143	97.5	92.7273	97.0238	96.5714	95.7346	96.875	93.7008	101.46	102.804	98.2456	100.877	100	100	102.19	107.194			11.2417	95.5356	1.36282	4	99.7376	1.30033	4	98.0765	1.12359	4	101.93	2.11253	4
	11.3295	95.8333	95.625	96.9697	98.2143	95.4286	95.7346	97.3214	95.2756	100.73	99.0654	98.2456	100.877	106.452	100.781	99.2701	107.914			11.3294	95.9259	0.366462	4	99.1006	0.624106	4	99.599	2.59297	4	101.309	2.30968	4
	15.0078	104.762	110	104.848	109.524	112.571	110.9	110.268	105.118	140.876	134.579	130.702	139.474	137.097	139.062	141.606	140.288			15.0078	106.182	1.27488	4	128.57	6.59739	4	124.908	7.62298	4	133.259	7.66856	4
	15.0953	104.762	110	106.061	110.714	110.286	108.057	110.714	104.724	145.255	134.579	131.579	142.105	135.484	133.594	143.066	143.165			15.0953	106.387	1.24383	4	129.744	6.71863	4	121.855	7.34724	4	135.55	8.29403	4
	15.1831	104.167	110	104.848	108.929	110.286	109.479	111.607	103.15	141.606	132.71	128.07	137.719	140.323	136.719	140.146	148.201			15.1831	105.541	1.5267	4	126.857	6.29252	4	124.201	8.30152	4	135.39	8.11898	4
	15.2711	105.357	108.75	104.848	108.333	110.857	108.531	109.375	103.937	142.336	132.71	128.947	137.719	136.29	135.156	142.336	143.165			15.2711	105.723	1.05084	4	126.928	6.45322	4	122.709	7.53257	4	134.303	8.31164	4
	15.3591	106.548	107.5	106.667	111.31	109.714	109.479	110.268	104.331	139.416	135.514	124.561	141.228	137.097	136.719	143.066	144.604			15.3591	106.261	0.67749	4	128.153	6.59385	4	123.252	7.88462	4	134.339	8.09695	4
	15.4469	105.952	109.375	103.636	108.929	111.429	110.427	108.929	103.937	143.066	135.514	128.947	142.105	137.903	131.25	143.066	145.324			15.4469	105.725	1.32078	4	128.874	7.17043	4	122.752	6.96367	4	135.096	8.73866	4
	15.5349	108.333	106.875	106.061	108.929	110.857	109.005	109.821	103.937	140.876	133.645	130.702	136.842	136.29	134.375	140.876	143.885			15.5349	106.301	0.917697	4	127.529	6.32574	4	122.632	7.353	4	133.865	8.0457	4
	15.6229	105.357	108.75	106.667	108.929	110.857	107.583	109.375	103.15	138.686	133.645	124.561	138.596	136.29	135.938	142.336	142.446			15.6229	105.981	1.17415	4	126.433	6.51837	4	122.667	7.79265	4	133.211	7.99312	4
	15.7107	104.167	107.5	104.848	109.524	111.429	111.374	109.821	102.756	142.336	135.514	128.947	142.982	136.29	134.375	140.876	147.482			15.7107	104.818	0.99459	4	129.242	7.17074	4	123.367	6.91939	4	135.129	8.55393	4
	15.7984	103.571	107.5	104.848	107.738	112	108.531	111.607	105.906	146.715	133.645	128.07	140.351	137.097	135.938	140.146	145.324			15.7985	105.456	0.831703	4	127.451	7.03416	4	123.391	7.61492	4	135.948	8.2358	4
	15.8865	104.167	107.5	105.455	110.119	112	109.005	111.607	103.543	144.526	133.645	128.07	140.351	139.516	135.156	138.686	145.324			15.8865	105.166	0.873811	4	128.046	6.48162	4	123.919	7.82115	4	135.036	7.9484	4
RAW DATA
		0	0	0	0.8	2.5	2.5	5	0	5	0.8	0.8	0.8	2.5	2.5	5	5
		144	144	145	143	144	141	142	141	110	99	102	99	98	99	98	97
		145	142	144	145	141	144	142	141	110	101	100	98	99	97	99	96
		145	147	139	142	136	139	142	141	110	99	102	98	99	96	102	94
		144	139	143	142	138	149	143	141	110	100	104	99	96	97	97	96
		141	139	147	138	140	144	137	146	108	99	102	98	100	98	97	98
		140	136	141	136	139	142	135	142	109	97	98	95	97	97	95	97
		137	137	140	139	135	143	140	138	108	98	100	94	101	95	94	95
		137	139	136	137	136	145	135	131	110	97	102	95	98	96	94	94
		136	138	131	135	133	143	136	129	111	97	101	97	99	98	100	95
		134	134	135	135	131	141	135	127	113	93	97	95	98	97	96	92
		134	131	134	131	131	140	133	128	112	96	99	97	97	93	94	92
		133	134	134	132	129	141	135	127	111	94	97	97	97	94	90	92
		134	130	131	132	127	142	132	128	112	93	95	96	99	94	92	92
		132	129	134	134	127	142	128	129	111	93	96	95	98	96	92	90
		137	130	131	129	126	140	128	126	111	91	97	95	101	94	93	89
		133	128	131	128	129	138	128	125	111	91	97	92	96	96	93	88
		131	127	129	128	125	137	128	128	110	92	96	92	93	93	91	90
		132	127	129	128	126	142	124	127	110	92	95	93	96	93	89	90
		130	130	128	129	124	137	121	128	108	92	94	91	94	91	92	85
		128	128	128	128	125	139	129	131	111	89	96	91	96	90	89	90
		131	128	129	132	124	136	125	126	106	87	94	89	91	89	88	87
		132	127	130	127	125	138	125	125	109	87	93	92	98	92	90	86
		130	126	127	126	123	138	124	125	107	92	94	87	94	90	94	88
		127	127	126	125	123	136	121	127	109	91	92	90	94	89	91	85
		128	125	129	125	123	137	122	128	113	88	92	85	96	88	88	83
		126	123	127	128	126	138	125	124	112	89	93	89	93	88	90	88
		127	126	126	125	121	138	125	122	109	87	92	90	93	89	90	87
		125	125	129	125	123	136	128	125	110	87	93	90	93	90	92	84
		125	123	128	124	124	139	123	125	109	86	90	90	94	90	89	83
		126	125	126	124	122	137	124	123	111	88	91	90	96	91	90	83
		126	125	127	124	123	139	124	125	110	87	93	90	93	89	90	84
		128	126	126	123	122	139	124	124	109	87	91	87	94	89	91	84
		125	124	125	125	123	135	125	123	109	89	93	85	95	89	88	84
		122	126	123	123	120	137	124	121	112	87	91	84	92	88	89	86
		127	122	125	123	122	136	121	121	108	88	92	87	94	90	89	83
		129	123	124	123	120	134	122	123	109	88	92	87	96	90	88	87
		126	123	125	123	121	136	122	124	110	86	92	87	93	88	89	84
		127	122	122	124	119	137	122	123	108	89	93	87	94	88	88	86
		128	128	124	120	120	135	120	119	109	85	89	87	97	87	87	83
		125	123	128	122	119	137	122	122	110	87	89	85	94	89	89	85
		124	122	123	123	120	135	123	121	111	89	91	84	95	86	92	83
		124	124	125	124	120	136	120	122	107	87	92	87	96	89	88	84
		124	122	123	124	120	136	120	122	109	86	90	84	95	90	89	84
		120	124	121	120	119	133	118	123	110	87	90	86	96	88	91	83
		125	124	124	119	118	134	120	120	108	88	87	88	94	87	90	83
		124	123	122	121	116	134	120	123	108	85	92	86	96	88	90	84
		125	122	125	122	119	135	120	121	111	87	89	86	97	88	89	83
		124	123	121	120	119	136	120	119	110	86	88	88	93	87	91	82
		123	123	125	120	118	132	122	120	111	86	88	85	96	87	89	83
		141	132	131	131	127	145	127	131	116	96	95	95	99	92	95	91
		142	130	129	130	127	145	129	133	116	94	95	92	97	93	95	91
		143	133	133	130	128	144	127	133	117	96	98	92	99	91	93	89
		145	128	134	129	129	144	124	131	118	94	96	94	99	93	94	90
		144	129	131	131	127	141	127	128	117	95	97	95	99	93	97	92
		144	133	133	132	132	144	125	130	120	95	96	95	100	93	94	90
		144	132	134	131	126	143	129	130	115	92	95	94	98	94	95	94
		139	132	130	133	127	144	128	129	115	93	98	93	98	90	94	92
		141	130	132	131	128	141	128	130	115	94	97	94	98	92	96	91
		143	132	128	130	128	146	126	131	116	93	94	95	97	94	94	90
		142	130	133	132	128	143	126	130	115	96	93	92	99	91	93	90
		141	130	130	129	126	143	125	130	112	94	96	93	98	92	95	87
		143	130	133	130	127	143	125	127	117	92	93	90	98	91	93	90
		140	129	130	130	124	144	123	127	114	94	92	93	99	92	93	90
		141	130	132	130	123	142	126	132	114	95	97	94	97	90	95	90
		138	131	133	130	124	142	124	128	117	91	95	91	98	92	96	90
		141	127	132	129	126	142	125	129	115	94	93	93	99	91	94	90
		142	128	129	123	129	140	126	127	116	94	93	95	97	92	95	90
		138	130	132	127	126	143	123	130	113	96	97	93	99	90	93	88
		132	131	126	127	125	141	121	129	115	93	91	92	98	91	93	90
		168	160	165	168	175	211	224	254	135	111	113	116	123	124	137	135
		168	159	168	169	177	204	223	243	136	113	113	114	122	121	133	145
		169	160	165	166	174	212	221	252	137	109	114	117	123	121	133	141
		166	158	162	167	178	206	220	248	139	112	114	114	124	123	137	141
		169	157	162	165	174	209	217	249	135	111	114	116	122	124	134	138
		164	159	163	166	177	210	220	245	137	110	115	119	119	124	137	135
		167	161	167	166	178	208	222	245	136	109	115	115	123	122	136	142
		169	162	166	164	172	210	222	247	140	113	115	115	124	126	135	136
		164	161	162	171	173	205	216	248	136	111	111	115	126	127	136	142
		171	159	159	167	171	208	222	238	141	109	115	117	125	125	133	141
		168	160	161	163	171	205	220	244	137	110	113	116	123	123	135	137
		166	160	159	165	172	206	218	240	138	111	110	113	125	124	134	143
		163	159	160	163	169	204	219	244	135	111	113	116	123	123	133	142
		167	160	164	165	171	207	218	244	136	110	114	115	122	123	136	139
		166	160	162	161	173	206	219	243	141	111	114	117	124	124	134	140
		166	160	160	164	172	205	216	244	133	108	113	115	120	124	135	138
		170	156	162	166	170	205	220	242	136	110	114	112	122	123	136	141
		162	159	160	163	172	210	223	241	137	112	111	116	123	124	135	139
		162	160	161	166	175	207	215	243	136	108	112	114	125	123	135	142
		165	160	159	167	173	206	219	244	133	110	115	113	124	125	134	141
		163	159	157	167	174	204	217	244	136	110	116	120	126	125	140	140
		162	161	163	162	171	205	220	239	136	110	112	114	126	123	133	140
		163	158	159	162	174	208	217	243	135	109	113	113	124	123	135	137
		166	158	163	169	172	204	219	242	136	109	112	112	125	125	136	140
		162	159	164	160	170	208	219	241	138	109	112	113	126	126	135	143
		168	157	162	162	172	207	218	245	134	110	112	118	127	126	138	140
		164	158	163	165	170	206	217	240	140	109	113	116	123	126	136	139
		165	158	161	168	174	205	223	241	136	109	110	116	124	123	136	144
		163	157	160	161	172	207	222	239	135	112	110	114	126	124	141	139
		164	158	156	162	171	209	217	242	140	109	109	116	126	126	137	140
		166	157	161	165	174	202	219	246	135	109	114	114	124	128	137	139
		164	160	162	164	175	208	218	241	138	110	111	114	127	124	135	139
		164	158	159	163	173	203	220	241	135	111	113	115	127	122	138	141
		166	156	160	162	174	202	216	239	141	111	113	114	123	126	137	141
		167	160	161	163	172	206	221	242	136	111	107	115	124	125	137	141
		164	159	162	165	173	203	214	242	134	114	114	115	128	124	140	142
		161	155	161	164	174	203	216	242	140	112	112	115	126	125	138	141
		166	158	159	164	176	202	215	242	137	110	111	118	125	125	137	137
		164	163	158	164	173	201	219	243	138	107	113	118	125	124	139	144
		166	158	158	163	174	205	222	237	138	110	112	115	126	126	139	141
		161	161	161	164	173	201	217	240	138	108	114	114	128	124	139	143
		161	158	159	162	172	205	217	241	136	111	112	115	123	126	134	141
		162	158	160	162	175	206	215	243	138	112	113	114	128	124	135	141
		163	157	163	159	171	206	218	240	140	111	111	114	125	125	138	141
		161	156	159	167	172	201	219	238	138	110	109	117	125	123	136	140
		160	156	163	165	174	204	219	240	131	110	113	115	127	128	134	141
		161	160	161	165	175	205	220	239	134	111	111	119	123	127	137	143
		168	159	160	159	174	204	214	242	137	110	111	115	126	127	137	146
		166	158	157	163	174	205	218	239	139	112	115	117	131	125	134	145
		160	158	156	163	172	204	214	241	136	107	114	113	123	126	138	140
		163	157	161	169	174	201	215	241	137	107	110	117	127	126	138	143
		163	156	159	161	170	206	221	242	138	107	110	117	126	128	138	142
		163	154	159	163	173	201	216	239	139	109	113	116	129	126	139	141
		165	156	157	164	172	204	217	233	139	112	114	117	129	126	137	144
		163	156	156	162	176	201	217	239	138	108	113	116	122	126	135	141
		162	156	156	166	172	201	220	243	135	106	110	113	129	128	140	140
		161	159	157	164	173	204	215	243	137	111	114	112	126	125	133	146
		162	157	159	164	171	203	223	241	139	111	113	117	123	124	137	145
		162	154	159	163	170	200	220	237	139	107	115	116	125	123	138	143
		160	161	156	163	172	203	218	241	137	111	112	115	125	120	139	146
		161	159	157	161	173	200	216	239	135	112	111	114	126	126	135	143
		161	157	158	162	170	207	218	236	139	109	109	116	124	126	134	140
		166	156	159	168	174	205	218	238	138	109	110	115	128	126	135	146
		161	158	157	163	171	203	217	240	139	112	109	118	125	126	135	148
		162	155	157	164	172	204	220	245	138	109	115	114	129	125	136	144
		162	159	157	164	172	201	218	236	141	109	113	115	126	128	140	148
		164	160	159	162	169	204	213	240	138	110	112	115	124	126	136	142
		159	159	154	164	175	200	217	244	139	110	111	115	127	129	138	144
		158	155	157	161	170	206	217	236	137	108	111	116	126	127	136	146
		164	160	157	163	171	202	217	243	140	112	115	118	127	126	136	147
		159	155	163	166	171	203	217	238	135	112	109	118	125	126	139	147
		163	157	158	164	168	201	221	239	137	111	110	116	125	126	133	148
		163	155	159	164	174	204	213	236	137	109	113	115	125	124	139	144
		161	155	156	161	170	201	217	239	139	110	110	117	128	129	134	144
		161	155	158	159	168	200	223	235	143	111	112	116	125	123	139	147
		161	158	157	161	172	207	215	239	138	109	112	117	126	128	137	145
		163	156	157	165	168	203	214	242	136	108	111	115	129	128	139	146
		160	153	158	162	173	205	219	236	136	109	109	114	123	128	140	146
		160	157	158	160	173	198	215	239	139	111	112	117	126	126	138	146
		160	155	160	164	171	203	217	243	136	111	111	115	128	125	140	148
		162	154	157	162	168	201	214	238	139	110	112	111	126	125	138	146
		162	156	159	166	171	205	221	243	137	107	113	113	127	121	138	146
		159	157	155	166	170	203	220	236	136	108	113	116	128	124	141	148
		161	155	157	162	171	205	215	241	138	110	112	112	124	127	138	147
		161	156	158	162	172	201	220	239	138	108	115	117	128	123	141	147
		162	157	157	163	168	201	214	239	136	108	112	114	126	125	138	146
		159	154	156	160	169	206	215	238	137	111	112	116	126	127	143	147
		164	156	159	165	174	200	217	239	138	110	112	116	125	125	136	143
		162	157	152	162	170	204	219	239	138	110	111	116	128	128	137	146
		159	156	161	162	174	203	219	234	138	109	113	117	124	127	141	145
		161	155	156	162	170	202	216	239	135	111	112	115	124	126	139	147
		162	153	158	162	170	205	215	243	137	108	111	113	128	129	141	143
		161	159	157	163	173	204	215	237	137	108	113	118	127	122	138	150
		160	153	157	165	173	202	215	239	140	112	111	118	128	126	139	145
		163	158	157	160	169	202	217	239	136	110	109	115	126	124	141	143
		163	153	156	163	172	207	216	244	138	109	110	115	128	127	136	148
		164	157	160	164	174	207	214	238	135	109	113	116	124	126	138	147
		159	156	157	163	173	200	216	240	140	107	113	117	128	126	138	144
		164	153	156	160	171	202	217	235	138	110	112	117	131	127	139	145
		164	154	157	162	167	201	215	239	142	109	113	119	125	125	140	143
		166	154	155	163	168	201	212	238	137	109	112	116	125	127	139	149
		163	155	160	162	171	197	209	238	138	109	111	115	123	126	139	147
		159	153	156	162	170	201	215	238	138	108	111	113	125	126	140	147
		158	155	155	163	177	202	216	242	138	109	111	117	127	125	139	144
		164	154	155	164	172	200	215	239	136	108	113	114	124	128	138	145
		161	155	154	162	171	202	214	239	138	107	110	116	131	127	139	145
		163	154	154	159	169	205	215	239	138	106	114	115	129	128	142	144
		163	156	159	164	170	203	211	238	133	110	111	115	127	127	138	148
		163	152	159	160	169	200	219	238	136	106	111	115	126	126	141	144
		159	155	155	160	171	202	216	237	137	111	111	114	128	125	139	147
		161	159	158	163	172	204	214	240	138	109	112	113	125	124	141	146
		160	153	155	161	173	200	213	241	138	107	112	116	124	127	137	149
		165	158	156	164	172	204	214	241	138	107	115	117	126	128	137	146
		166	154	158	160	168	203	214	235	141	111	111	117	128	127	137	147
		163	155	161	164	174	201	215	236	140	106	115	115	125	125	137	148
		163	152	156	163	170	203	215	244	139	109	111	115	124	124	137	148
		162	153	156	163	170	202	216	234	139	111	110	118	127	126	142	148
		170	157	159	164	173	200	218	241	138	111	113	118	125	125	138	148
		162	154	155	161	169	205	214	236	140	107	110	117	130	125	141	147
		161	156	157	164	166	201	218	240	138	108	111	118	130	125	145	149
		165	151	157	161	171	202	222	239	140	109	106	117	128	127	140	149
		165	154	156	160	175	201	216	240	138	111	112	117	129	125	139	150
		163	153	156	165	176	205	217	243	137	107	112	116	130	125	139	144
		164	153	158	164	165	208	219	236	135	111	112	115	129	128	141	146
		162	155	160	163	170	203	217	234	137	109	111	115	130	127	140	148
		160	156	158	165	172	204	222	239	136	110	111	117	128	126	140	151
		165	151	156	156	174	201	220	237	136	112	109	114	126	124	142	145
		162	154	155	163	171	201	217	239	141	108	113	117	129	125	142	149
		165	156	153	163	169	202	217	238	139	110	112	115	124	128	140	149
		161	153	160	165	167	202	218	242	138	106	112	115	132	129	136	150
		176	176	173	184	197	234	247	267	193	144	149	159	170	178	194	195
		176	176	175	186	193	228	248	266	199	144	150	162	168	171	196	199
		175	176	173	183	193	231	250	262	194	142	146	157	174	175	192	206
		177	174	173	182	194	229	245	264	195	142	147	157	169	173	195	199
		179	172	176	187	192	231	247	265	191	145	142	161	170	175	196	201
		178	175	171	183	195	233	244	264	196	145	147	162	171	168	196	202
		182	171	175	183	194	230	246	264	193	143	149	156	169	172	193	200
		177	174	176	183	194	227	245	262	190	143	142	158	169	174	195	198
		175	172	173	184	195	235	246	261	195	145	147	163	169	172	193	205
		174	172	173	181	196	229	250	269	201	143	146	160	170	174	192	202
		175	172	174	185	196	230	250	263	198	143	146	160	173	173	190	202

## Sheet: Fig8H
Elen-T224A-G58N
lipid to protein ratio 50
Manganese transport
NORMALIZED DATA
		Concentration (uM)									Concentration (uM)											Concentration
		Mn									Mn											Mean	SEM	N
	Time (min)	0	50	50	50	400	400	400	400		0		50	50	50	400	400	400			Time (min)	0 μM Mn2+			50 μM Mn 2+			400 μM Mn2+
	-6.18453	117.624	147.35	152.652	148.086	136.894	156.786	157.573	162.301		123.817		143.3	149.96	157.312	159.972	170.613	178.071			-6.18453	120.72	3.0965	2	149.776	1.96447	6	160.316	4.86459	7
	-6.11715	117.396	143.664	154.216	147.867	134.104	154.133	157.065	160.28		117.575		143.162	146.12	154.384	154.513	167.75	178.167			-6.11715	117.486	0.08945	2	148.236	2.03971	6	158.002	5.13152	7
	-6.05075	115.321	142.822	149.447	149.362	129.552	157.132	158.434	160.707		117.501		139.712	144.98	156.644	155.615	165.737	171.948			-6.05075	116.411	1.08985	2	147.161	2.44315	6	157.018	5.04952	7
	-5.98428	115.094	143.594	151.202	144.039	130.727	153.326	159.569	159.464		115.437		135.603	141.622	152.86	151.895	162.412	173.058			-5.98428	115.265	0.17155	2	144.82	2.5991	6	155.779	4.92616	7
	-5.91737	110.745	140.049	152.27	147.43	129.515	158.554	157.025	161.251		112.891		131.647	143.952	148.425	147.158	157.554	163.28			-5.91737	111.818	1.0731	2	143.962	2.98855	6	153.477	4.4337	7
	-5.85097	115.947	142.366	154.216	148.596	131.021	155.286	158.474	156.082		113.756		133.885	140.048	143.818	146.262	155.67	162.055			-5.85097	114.851	1.0953	2	143.822	2.86315	6	152.122	3.95481	7
	-5.78428	112.479	141.874	151.354	145.972	129.956	155.171	152.133	156.549		112.916		132.413	135.341	141.935	148.519	154.636	164.619			-5.78428	112.697	0.21845	2	141.482	2.81618	6	151.655	4.06549	7
	-5.71762	110.858	137.803	152.919	142.873	127.349	153.057	155.225	158.065		107.552		128.642	133.703	141.695	144.385	148.227	157.176			-5.71762	109.205	1.6534	2	139.606	3.4185	6	149.069	4.06735	7
	-5.65095	113.218	137.697	145.479	140.357	125.477	152.557	152.172	149.903		108.553		129.454	134.185	142.14	141.595	149.224	160.735			-5.65095	110.885	2.3325	2	138.219	2.35247	6	147.38	4.22881	7
	-5.5843	111.626	137.487	149.027	145.097	127.349	148.135	153.973	153.051		106.588		127.185	129.092	141.49	141.13	144.108	155.3			-5.5843	109.107	2.51915	2	138.23	3.56088	6	146.149	3.71393	7
	-5.51763	111.143	137.697	146.089	141.05	126.468	149.327	151.115	154.839		105.401		127.584	130.153	138.836	136.841	144.81	155.817			-5.51763	108.272	2.8708	2	136.901	2.81881	6	145.603	4.01608	7
	-5.45068	110.972	134.503	147.005	142.326	126.175	150.942	149.472	152.701		106.415		124.348	128.723	137.106	140.217	138.936	158.4			-5.45068	108.693	2.2788	2	135.669	3.42855	6	145.263	4.10497	7
	-5.38428	109.892	134.223	145.899	139.665	126.101	146.521	149.198	149.009		103.189		125.682	131.068	137.962	135.033	144.071	154.325			-5.38428	106.54	3.35165	2	135.75	2.87993	6	143.465	3.66396	7
	-5.3176	108.3	135.767	143.342	140.394	126.615	145.329	150.372	149.436		100.729		122.6	128	138.801	137.392	140.469	154.688			-5.3176	104.515	3.7855	2	134.817	3.24691	6	143.472	3.59417	7
	-5.25088	108.044	133.45	140.786	139.555	128.818	147.405	149.511	151.069		101.372		121.374	130.94	138.75	137.668	137.865	154.248			-5.25088	104.708	3.3362	2	134.143	2.99131	6	143.798	3.46718	7
	-5.18423	109.494	130.748	140.824	136.529	126.505	146.175	147.789	150.797		101.063		125.054	131.647	138.031	134.826	135.279	151.454			-5.18423	105.278	4.21555	2	133.805	2.34619	6	141.832	3.63264	7
	-5.1173	105.543	135.03	141.931	135.545	125.771	144.521	147.241	146.522		101.842		120.607	130.056	133.836	136.876	137.292	148.909			-5.1173	103.692	1.85065	2	132.834	2.90478	6	141.019	3.11323	7
	-5.0509	107.021	133.029	142.007	136.566	125.771	144.368	145.519	148.543		102.126		120.715	128.884	131.969	132.105	139.195	153.674			-5.0509	104.573	2.4476	2	132.195	2.93764	6	141.31	3.66097	7
	-4.98423	108.357	130.537	140.595	137.368	124.853	143.752	142.661	149.436		97.4045		117.939	128.835	133.63	135.412	138.585	153.54			-4.98423	102.881	5.47624	2	131.484	3.23321	6	141.177	3.57346	7
	-4.91758	107.305	129.87	138.955	134.233	123.789	144.022	139.061	145.705		101.483		121.619	124.835	132.654	136.307	136.073	151.741			-4.91758	104.394	2.9111	2	130.361	2.59032	6	139.528	3.37278	7
	-4.85065	106.936	127.94	142.694	135.764	126.358	141.83	141.918	147.221		101.446		119.718	128.787	134.281	132.931	139.823	147.532			-4.85065	104.191	2.74485	2	131.53	3.21485	6	139.659	2.89159	7
	-4.78423	105.941	126.781	139.374	134.014	125.771	142.676	138.904	145.317		98.109		120.331	126.313	130.36	133.689	137.976	149.292			-4.78423	102.025	3.91594	2	129.529	2.70939	6	139.089	2.94212	7
	-4.71757	106.879	128.607	136.742	130.66	127.46	140.408	141.135	144.967		101.347		121.006	124	127.842	128.918	134.171	145.274			-4.71757	104.113	2.76585	2	128.143	2.22622	6	137.476	2.77482	7
	-4.6509	104.804	126.29	133.651	130.769	122.394	138.985	139.609	140.77		98.9989		118.706	124.803	132.534	131.33	139.121	144.221			-4.6509	101.901	2.90251	2	127.792	2.30528	6	136.633	2.78668	7
	-4.58423	103.383	127.589	132.392	132.41	126.211	138.562	140.705	140.847		97.7011		119.457	125.687	134.058	129.814	137.163	143.551			-4.58423	100.542	2.84072	2	128.599	2.24936	6	136.693	2.39685	7
	-4.51758	104.349	124.5	132.392	128.29	126.101	137.524	137.221	139.409		100.939		115.67	122.956	129.366	129.969	137.902	148.527			-4.51758	102.644	1.7049	2	125.529	2.41063	6	136.665	2.70464	7
	-4.4509	101.734	123.938	131.362	131.498	123.238	137.409	139.53	140.497		100.358		117.694	121.831	128.031	129.969	137.809	141.638			-4.4509	101.046	0.68775	2	125.726	2.26036	6	135.727	2.52822	7
	-4.38423	103.07	126.044	134.071	125.483	122.32	139.869	136.908	142.363		100.457		117.847	124.273	130.908	127.162	132.97	142.403			-4.38423	101.764	1.3063	2	126.438	2.29342	6	134.857	2.93814	7
	-4.31757	102.53	126.676	132.812	128.436	125.037	135.025	139.883	139.953		100.593		115.317	122.394	125.086	130.434	135.537	142.212			-4.31757	101.562	0.96825	2	125.12	2.42286	6	135.44	2.28576	7
	-4.2509	102.274	125.061	130.637	127.014	122.687	136.601	134.481	138.321		97.6394		116.805	120.578	124.863	128.97	135.002	145.025			-4.2509	99.9567	2.31732	2	124.16	1.98609	6	134.441	2.67324	7
	-4.18425	99.0335	126.711	132.316	130.879	123.348	135.563	135.342	134.629		98.4798		119.319	121.124	128.442	131.192	132.896	142.729			-4.18425	98.7567	0.276875	2	126.465	2.13904	6	133.671	2.19656	7
	-4.1175	102.16	124.5	129.95	126.285	122.026	132.449	136.751	137.699		98.7393		115.179	121.478	122.62	129.848	135.741	143.628			-4.1175	100.45	1.71048	2	123.335	2.0355	6	134.02	2.58194	7
	-4.05065	103.383	125.097	132.049	128.108	124.082	133.564	136.517	139.098		97.1573		116.36	120.129	123.134	124.75	133.062	142.595			-4.05065	100.27	3.11263	2	124.146	2.28649	6	133.381	2.6209	7
	-3.98423	98.5503	124.465	131.019	127.889	123.054	135.217	135.46	134.512		97.6888		117.234	121.43	129.932	126.542	135.556	144.891			-3.98423	98.1196	0.43076	2	125.328	2.17249	6	133.605	2.66927	7
	-3.91732	99.801	120.463	129.187	127.269	122.651	130.45	133.425	134.901		98.7641		112.649	121.365	128.442	126.61	132.231	146.211			-3.91732	99.2825	0.51848	2	123.229	2.59517	6	132.354	2.80495	7
	-3.85092	100.483	122.534	127.242	124.681	122.137	130.142	134.716	135.678		96.3045		115.609	120.884	124.486	127.42	131.733	140.394			-3.85092	98.3939	2.08933	2	122.573	1.64577	6	131.746	2.25041	7
	-3.78398	98.1239	122.324	128.997	125.665	123.568	131.449	133.072	133.657		99.3202		114.842	117.06	125.668	124.647	132.859	142.595			-3.78398	98.7221	0.59815	2	122.426	2.23974	6	131.693	2.39884	7
	-3.71758	97.4986	120.92	129.073	124.717	121.145	131.603	133.229	133.269		97.0461		115.685	122.137	125.325	128.281	135.094	144.451			-3.71758	97.2723	0.22624	2	122.976	1.8602	6	132.439	2.66448	7
	-3.65092	99.6873	121.446	125.906	125.046	121.916	131.142	134.207	132.064		96.8236		114.167	118.699	122.774	123.975	135.556	141.045			-3.65092	98.2555	1.43185	2	121.34	1.78017	6	131.415	2.50594	7
	-3.58425	98.7209	120.253	129.95	125.41	121.329	130.988	134.168	134.707		97.2439		114.995	117.317	125.308	129.142	137.181	141.638			-3.58425	97.9824	0.738505	2	122.206	2.30632	6	132.736	2.44479	7
	-3.51758	96.4468	119.656	127.356	124.462	123.495	131.027	135.695	133.074		96.6012		113.293	119.261	123.87	128.488	132.416	139.208			-3.51758	96.524	0.07716	2	121.316	2.03505	6	131.915	1.9055	7
	-3.45092	97.527	118.498	128.386	122.639	120.999	128.912	134.951	136.261		95.5506		116.805	115.614	122.14	125.904	133.672	141.045			-3.45092	96.5388	0.988195	2	120.68	1.92177	6	131.678	2.57493	7
	-3.38425	98.9767	119.551	125.029	122.457	121.916	129.642	131.468	134.318		94.9821		112.496	117.799	126.25	125.904	133.081	137.964			-3.38425	96.9794	1.99731	2	120.597	2.07847	6	130.613	2.03149	7
	-3.31758	94.7129	121.165	126.707	123.223	121.109	128.297	128.454	133.541		95.1551		113.094	119.149	122.894	127.368	131.585	139.361			-3.31758	94.934	0.2211	2	121.039	1.88901	6	129.959	2.14884	7
	-3.25065	97.2428	118.357	126.44	120.343	117.731	127.143	132.25	132.297		95.6		112.466	118.137	124.058	127.041	130.477	135.993			-3.25065	96.4214	0.82135	2	119.967	2.00829	6	128.99	2.21889	7
	-3.18425	98.5503	117.655	125.982	120.087	119.567	128.72	132.29	131.792		95.5753		112.941	119.791	124.76	124.922	129.682	141.753			-3.18425	97.0628	1.48749	2	120.203	1.9458	6	129.818	2.59451	7
	-3.11732	96.9869	118.287	124.914	120.489	117.695	128.451	132.29	135.406		97.2191		114.934	118.297	125.103	123.975	130.957	138.347			-3.11732	97.103	0.116105	2	120.337	1.6456	6	129.589	2.6457	7
	-3.05092	98.2376	118.638	124.342	121.764	119.971	130.334	130.333	130.198		97.2439		112.006	118.265	122.62	124.767	130.827	142.403			-3.05092	97.7407	0.496895	2	119.606	1.79512	6	129.833	2.59379	7
	-2.98425	95.7931	119.235	124.151	121.582	119.934	127.797	130.607	131.364		96.6135		112.818	120.835	121.798	123.7	130.532	139.457			-2.98425	96.2033	0.41023	2	120.07	1.58955	6	129.056	2.34811	7
	-2.10903	92.3536	120.007	127.165	123.296	126.138	127.72	130.763	133.813		95.4394		118.169	120.578	130.325	127.747	135.519	146.9			-2.10903	93.8965	1.54289	2	123.257	1.9049	6	132.657	2.70342	7
	-2.04522	94.2581	119.059	127.699	122.858	123.568	130.142	131.624	132.297		98.2573		116.207	121.285	130.034	130.365	136.498	145.121			-2.04522	96.2577	1.99961	2	122.857	2.1298	6	132.802	2.51341	7
	-1.98115	92.0125	117.866	123.96	120.27	124.192	127.067	128.963	131.52		98.5787		116.697	118.635	126.661	130.537	138.142	141.906			-1.98115	95.2956	3.28308	2	120.681	1.57762	6	131.761	2.35201	7
	-1.91735	93.0927	116.181	121.747	119.067	123.678	129.373	130.254	132.141		96.5764		117.464	118.185	126.781	132.673	136.406	141.676			-1.91735	94.8346	1.74188	2	119.904	1.57225	6	132.315	2.13817	7
	-1.85355	92.2399	117.69	123.502	119.869	123.201	127.297	129.785	129.732		97.0708		115.747	119.422	124.521	129.487	134.928	143.628			-1.85355	94.6554	2.41546	2	120.125	1.37095	6	131.151	2.4623	7
	-1.78948	93.519	117.866	122.51	118.556	123.642	127.951	129.863	132.375		95.872		116.513	120.835	125.976	129.194	134.411	143.762			-1.78948	94.6955	1.17646	2	120.376	1.42196	6	131.6	2.39977	7
	-1.72568	91.5009	119.726	126.173	117.864	124.743	126.682	132.759	131.636		94.4135		115.195	118.169	125.291	129.108	136.96	144.183			-1.72568	92.9572	1.45635	2	120.403	1.79084	6	132.296	2.49966	7
	-1.66188	91.0176	118.673	125.067	119.65	122.283	126.528	129.98	131.869		95.1922		117.893	119.052	125.377	128.918	132.785	142.939			-1.66188	93.1049	2.08729	2	120.952	1.37068	6	130.758	2.42715	7
	-1.59783	90.2786	117.094	125.525	120.379	125.661	127.336	130.568	135.095		94.3517		119.457	120.434	123.065	126.524	130.236	143.705			-1.59783	92.3152	2.03659	2	120.992	1.19836	6	131.303	2.3918	7
	-1.53403	92.8368	118.463	126.822	119.65	122.761	127.067	131.35	131.908		93.4619		112.404	120.112	123.904	128.522	135.094	138.787			-1.53403	93.1494	0.312515	2	120.226	2.01385	6	130.784	1.99713	7
	-1.46997	92.9505	117.831	124.456	121.218	124.706	125.26	129.159	133.385		94.8708		113.922	120.53	124.401	126.266	132.471	138.442			-1.46997	93.9107	0.96015	2	120.393	1.65034	6	129.956	1.9147	7
	-1.40615	93.1211	117.269	123.426	120.561	122.687	126.797	128.689	131.092		92.3619		111.132	114.779	124.932	128.057	132.287	141.906			-1.40615	92.7415	0.379605	2	118.683	2.15509	6	130.216	2.2734	7
	-1.34235	92.8937	118.147	122.701	121.363	123.825	124.26	128.924	128.099		94.154		111.883	116.61	123.853	124.027	134.559	139.897			-1.34235	93.5238	0.630155	2	119.093	1.82459	6	129.084	2.31136	7
	-1.27855	91.6146	116.673	124.647	119.103	121.549	125.375	129.706	132.375		96.2798		111.132	116.819	124.435	124.664	135.537	141.332			-1.27855	93.9472	2.33263	2	118.801	2.10781	6	130.077	2.60967	7
	-1.21477	90.1933	116.041	122.968	117.681	120.815	124.721	125.91	127.478		96.1191		111.224	117.944	122.586	125.525	131.105	138.404			-1.21477	93.1562	2.96292	2	118.074	1.78458	6	127.708	2.12931	7
	-1.15068	92.1546	113.443	123.235	118.629	120.815	125.567	125.284	129.887		95.3281		114.934	119.1	120.462	122.735	133.062	137.964			-1.15068	93.7414	1.58675	2	118.301	1.46855	6	127.902	2.29411	7
	-1.0869	92.7231	116.322	120.527	118.775	120.228	124.606	128.845	128.799		91.5214		114.275	117.124	122.808	125.474	133.931	139.074			-1.0869	92.1223	0.60085	2	118.305	1.25174	6	128.708	2.36019	7
	-1.02308	93.5759	115.795	123.274	116.806	119.824	124.298	126.341	130.12		95.081		112.757	118.57	119.726	123.631	131.751	141.485			-1.02308	94.3284	0.752525	2	117.821	1.46858	6	128.207	2.68375	7
	-0.959033	92.6379	115.69	122.93	121.181	122.283	124.99	125.793	126.156		94.9697		115.103	116.9	119.538	124.423	129.719	139.208			-0.95903	93.8038	1.16593	2	118.557	1.28936	6	127.51	2.12523	7
	-0.895217	92.78	112.917	120.832	118.374	120.007	126.413	126.614	127.789		94.4012		116.283	117.237	121.404	126.817	131.806	137.275			-0.89522	93.5906	0.8106	2	117.841	1.27754	6	128.103	2.01311	7
	-0.0636	99.1757	103.756	104.082	98.6876	100.11	100.077	106.458	100.233		100.791		101.165	100.594	101.216	98.0021	100.296	105.702			-0.0636	99.9833	0.807665	2	101.584	0.829413	6	101.554	1.20976	7
	0	100	100	100	100	100	100	100	100		100		100	100	100	100	100	100			0	100	0	2	100	0	6	100	0	7
	0.0638167	97.8113	101.65	98.2831	96.7189	96.5859	96.5398	102.348	96.4633		96.7371		98.8654	97.012	97.3973	97.072	98.8364	97.6081			0.063817	97.2742	0.53707	2	98.3211	0.741875	6	97.922	0.802864	7
	0.127867	99.1472	96.9463	100.496	95.5888	95.1542	93.6563	97.6517	97.2017		98.4922		99.2794	97.8313	97.4829	95.7458	98.9472	97.4933			0.127867	98.8197	0.327545	2	97.9374	0.708601	6	96.55	0.676884	7
	0.191933	99.7726	97.9291	98.5883	94.0941	94.8972	93.4256	97.3386	93.8982		96.3045		96.7955	97.3012	96.524	94.9363	97.4141	97.9908			0.191933	98.0386	1.73403	2	96.872	0.634859	6	95.7001	0.698946	7
	0.255733	97.8113	98.7013	99.9618	94.4586	94.9339	95.5786	97.1429	95.2585		96.9967		98.6661	97.8313	97.7226	93.0761	94.1633	97.0532			0.255733	97.404	0.4073	2	97.8903	0.760676	6	95.3152	0.55462	7
	0.319533	98.863	97.9642	98.2831	94.6044	94.6035	95.9631	97.8865	94.5977		98.6899		98.3901	96.9317	96.0103	93.3173	98.0421	95.0823			0.319533	98.7764	0.086545	2	97.0306	0.611707	6	95.6418	0.66883	7
	0.383583	97.5554	96.6304	98.9317	93.5837	94.163	92.2722	93.8552	95.1807		97.8371		97.0255	94.7149	95.0856	94.1957	94.1079	93.762			0.383583	97.6963	0.140835	2	95.9953	0.782519	6	93.9338	0.32743	7
	0.44765	97.7828	98.2801	95.8031	93.7295	92.5477	92.1184	95.5382	92.5768		98.1461		93.7902	93.992	95.5651	94.454	90.266	95.1014			0.44765	97.9645	0.18163	2	95.1933	0.720947	6	93.2289	0.711157	7
	0.51145	99.3462	98.0344	98.1305	91.4327	92.8047	91.0804	94.1683	93.1597		96.7371		93.8669	93.0924	94.863	91.3365	88.1603	90.796			0.51145	98.0417	1.30455	2	94.9033	1.10481	6	91.6437	0.744568	7
	0.57525	96.1057	98.1748	98.1305	92.3441	87.6285	88.7735	94.09	89.8951		96.9101		95.1242	90.5542	95.1884	89.4075	89.2686	89.6288			0.57525	96.5079	0.402205	2	94.9194	1.24779	6	89.8131	0.76605	7
	0.6393	99.5452	96.4198	95.6124	91.6515	90.3084	91.5802	93.1115	89.7396		94.7349		93.5603	92.1285	92.1233	86.5484	88.0126	88.5572			0.6393	97.14	2.40516	2	93.5826	0.819417	6	89.694	0.839942	7
	0.703383	97.8965	96.9814	95.4597	90.8494	89.978	88.1968	93.5029	90.4392		95.5012		94.2502	91.1486	93.6301	89.7348	91.2264	88.7868			0.703383	96.6988	1.19768	2	93.7199	0.979881	6	90.2664	0.65945	7
	0.767183	96.6458	95.7529	95.4597	89.938	89.2805	90.3114	91.546	89.623		97.2933		90.3864	92.0321	91.1644	88.2363	88.973	89.1121			0.767183	96.9696	0.323735	2	92.4556	1.03865	6	89.5832	0.404863	7
	0.83125	97.9818	93.5416	93.7047	89.8651	88.5463	85.2364	92.8376	88.3016		94.5989		91.981	87.6305	93.0651	88.0985	88.7144	88.3085			0.83125	96.2904	1.69144	2	91.6313	0.987451	6	88.5776	0.841038	7
	0.895033	97.8681	92.9098	94.8111	86.9851	89.0969	88.3506	89.8239	87.602		97.1079		92.7783	90.2651	90.9075	87.0307	87.5693	88.1936			0.895033	97.488	0.380105	2	91.4428	1.10795	6	88.2381	0.364389	7
	0.95885	98.7777	92.3833	93.1705	88.4069	90.0881	87.8893	91.6243	88.185		95.9708		90.8157	91.1004	91.3356	88.9252	87.6616	86.0314			0.95885	97.3743	1.40344	2	91.2021	0.664853	6	88.6293	0.683412	7
	1.02292	96.6742	93.6118	95.5361	87.9329	87.7019	86.5052	88.0626	86.2417		95.5135		93.1003	90.5542	89.7089	86.2728	88.5297	86.682			1.02292	96.0939	0.58036	2	91.7407	1.15165	6	87.1423	0.354225	7
	1.0867	97.328	92.3131	94.0862	88.1881	89.0235	87.5048	90.0587	88.2239		93.363		92.487	88.4337	90.4795	87.289	88.4004	86.1845			1.0867	95.3455	1.98252	2	90.9979	0.969939	6	88.0978	0.474999	7
	1.15052	95.992	92.4535	93.0179	86.1101	87.3715	86.9666	90.7241	86.3583		95.118		93.6369	90.747	89.4178	85.36	88.2342	85.6104			1.15052	95.555	0.437005	2	90.8972	1.14823	6	87.2322	0.693271	7
	1.21457	97.328	92.2429	92.1404	86.9121	85.1689	86.4667	89.0802	86.6304		94.9326		91.8583	89.2048	89.2979	85.67	84.9649	85.4765			1.21457	96.1303	1.19769	2	90.2761	0.880681	6	86.2082	0.53329	7
	1.27837	99.5168	93.0151	93.1705	87.459	87.4449	84.9673	87.8278	83.3657		93.1652		90.3097	88.8996	90.6678	87.1857	85.1866	85.5721			1.27837	96.341	3.17576	2	90.587	0.918069	6	85.9357	0.610545	7
	1.34243	99.3462	92.3131	92.5601	87.7506	86.1233	86.3899	87.3581	85.892		93.7214		90.1257	89.4779	88.8014	87.5646	88.3635	84.0605			1.34243	96.5338	2.8124	2	90.1715	0.785552	6	86.536	0.530236	7
	1.40623	98.5503	91.2601	92.0259	85.7455	84.2878	87.2357	87.8669	85.7365		93.7585		88.8071	89.0281	87.6541	84.0165	87.2922	83.6395			1.40623	96.1544	2.3959	2	89.0868	0.942693	6	85.725	0.666548	7
	1.4703	99.1757	92.5939	93.8955	88.5527	88.3627	84.8135	85.9883	83.7155		94.4383		92.2876	88.2731	90.1027	83.7065	85.4821	84.9407			1.4703	96.807	2.3687	2	90.9509	0.945132	6	85.287	0.603588	7
	1.53435	98.2376	92.4184	90.1564	87.9694	86.0866	84.852	87.5538	84.0653		94.0057		90.0644	88.5301	88.9384	86.29	83.1917	83.2951			1.53435	96.1217	2.11598	2	89.6795	0.649923	6	85.0478	0.625324	7
	1.59815	98.2945	91.2952	88.6684	85.3445	86.1601	84.4291	87.2407	86.5915		93.6349		91.6437	87.7912	89.0411	84.4643	84.3184	84.6345			1.59815	95.9647	2.32979	2	88.964	0.951921	6	85.4055	0.461862	7
	1.66222	96.191	91.3654	92.7509	86.1466	85.3157	82.7374	87.045	83.8321		91.8181		88.1631	88.6104	88.8699	83.896	85.5929	83.4481			1.66222	94.0045	2.18647	2	89.3177	0.967292	6	84.5525	0.563613	7
	1.72603	97.527	90.2773	90.3853	84.907	85.6461	84.0446	87.7886	84.4928		93.1529		87.9945	87.5663	87.6541	84.4299	85.5375	84.8833			1.72603	95.3399	2.18705	2	88.1308	0.829609	6	85.2604	0.476018	7
	1.79008	99.2894	90.2773	91.1484	87.2767	84.5081	83.9293	86.5753	84.2985		93.4989		88.6998	87.3092	87.5	85.1361	85.0573	83.0654			1.79008	96.3942	2.89521	2	88.7019	0.680259	6	84.6528	0.416419	7
	1.8539	95.9068	91.7164	92.293	84.7612	85.2423	82.8912	85.8708	84.143		94.6113		88.6078	87.5502	89.863	85.1361	84.1707	81.1137			1.8539	95.259	0.647735	2	89.1319	1.14143	6	84.0811	0.615241	7
	1.91795	96.7595	91.2952	91.034	83.3759	82.1953	82.1223	85.4403	81.6945		94.6113		90.601	87.743	87.6541	84.6194	85.6853	81.5538			1.91795	95.6854	1.07411	2	88.6172	1.23978	6	83.3301	0.694178	7
	1.98175	99.7442	90.2071	91.1103	84.4331	82.3789	81.7762	86.9276	80.5674		95.1922		89.4051	89.4779	88.1336	83.6204	84.263	81.4007			1.98175	97.4682	2.27599	2	88.7945	0.960151	6	82.9906	0.813049	7
	2.04555	97.2428	88.8733	89.9657	83.1207	84.6549	81.4302	85.4795	82.2386		96.9225		86.1086	87.4056	89.6404	84.8433	83.8013	83.3716			2.04555	97.0826	0.16012	2	87.519	1.05937	6	83.6885	0.551838	7
	2.10987	96.191	90.9793	91.301	83.1571	83.6637	81.8531	83.4834	81.4225		92.8933		90.831	86.9719	85.4795	82.8281	81.3077	83.0463			2.10987	94.5422	1.64884	2	88.12	1.3972	6	82.515	0.369262	7
	2.17367	94.5992	87.7852	89.6986	84.7612	82.3421	82.9296	84.775	80.4897		93.981		90.6777	89.9598	86.6781	82.7937	83.0624	80.597			2.17367	94.2901	0.309115	2	88.2601	0.92689	6	82.4271	0.565115	7
	2.23773	98.7493	89.5753	90.1564	83.7769	81.7548	82.3145	83.3268	81.4613		91.4102		90.3097	86.2651	90.5651	81.9325	83.0255	80.9989			2.23773	95.0798	3.66954	2	88.4414	1.1361	6	82.1163	0.315225	7
	2.30153	96.9301	89.5051	89.0118	83.8498	83.2599	81.9685	83.5225	81.3059		94.8585		89.6197	88.9317	88.887	85.3083	82.416	81.7069			2.30153	95.8943	1.0358	2	88.3009	0.899048	6	82.784	0.51846	7
	2.36533	94.0307	89.7859	88.9355	83.1936	82.7093	81.584	82.8963	80.3342		94.6113		88.9451	85.8795	86.1473	85.3255	83.7089	82.1852			2.36533	94.321	0.2903	2	87.1478	1.02683	6	82.6776	0.598682	7
	2.42913	94.5424	88.2766	87.562	84.5425	81.1307	81.9685	84.6184	79.0517		94.809		88.6998	87.6787	85.976	83.6376	84.3738	83.3333			2.42913	94.6757	0.13335	2	87.1226	0.640137	6	82.5877	0.755646	7
	2.49295	96.589	88.2766	90.1564	82.829	80.6535	81.0842	84.1879	79.8679		94.327		89.3744	87.8554	85.274	82.3286	82.0835	78.3965			2.49295	95.458	1.13097	2	87.2943	1.12278	6	81.2289	0.705798	7
	2.557	96.1057	90.7336	88.7829	84.4331	83.0764	83.391	83.1703	80.9172		95.2787		87.7952	88.5462	85.7705	83.1898	84.0783	80.7118			2.557	95.6922	0.41352	2	87.6769	0.921822	6	82.6478	0.49019	7
	2.6208	99.2041	89.3998	86.3792	83.1571	80.5066	81.2764	83.953	78.974		95.4641		88.8684	86.6827	86.6438	84.7916	82.4529	80.9414			2.6208	97.3341	1.87	2	86.8552	0.903784	6	81.8423	0.7664	7
	2.6846	97.8681	88.1011	89.4315	83.9956	80.7636	79.2388	81.1742	78.5853		94.3765		88.7918	88.7068	85.0342	80.5546	82.3051	77.2101			2.6846	96.1223	1.74582	2	87.3435	0.920702	6	79.9759	0.653621	7
	2.74867	97.9534	87.6448	86.7989	83.4123	81.8282	79.4694	82.2309	79.829		96.3787		87.9638	86.3614	87.6541	83.9476	81.5663	78.3773			2.74867	97.166	0.787345	2	86.6392	0.690682	6	81.0355	0.720346	7
	2.81273	96.9585	88.768	87.066	83.0113	82.1586	78.5467	82.4266	79.9845		92.5349		86.0012	84.5301	84.5548	81.0885	80.3657	78.473			2.81273	94.7467	2.21179	2	85.6552	0.841952	6	80.4348	0.597359	7
	2.8768	99.602	88.0309	87.4857	80.751	81.0573	78.9312	81.2133	79.0906		90.9653		87.6572	84.6747	86.2671	81.3813	82.0835	77.6119			2.8768	95.2837	4.31839	2	85.8111	1.12906	6	80.1956	0.621892	7
	2.9406	94.4855	87.013	88.4777	80.6781	82.3789	79.2388	81.1742	78.7019		93.7461		87.3045	84.6908	85.8048	80.279	79.6823	77.8416			2.9406	94.1158	0.36968	2	85.6615	1.12922	6	79.8995	0.578774	7
	3.0044	98.465	86.662	86.9134	81.6624	80.837	79.8539	80.8219	76.2923		92.7574		85.5566	82.6988	86.6438	80.6235	82.2313	80.1952			3.0044	95.6112	2.85383	2	85.0228	0.928568	6	80.1221	0.697711	7
	3.06845	97.328	86.4865	86.6845	82.1728	82.0485	78.9312	81.4873	78.0801		92.4113		90.3251	85.7992	88.5616	82.5181	82.6191	77.5928			3.06845	94.8697	2.45836	2	86.6716	1.12479	6	80.4681	0.826608	7
	3.13227	96.2479	88.7329	87.4857	81.2614	78.6344	80.2384	81.9569	78.663		92.2259		87.9945	86.49	84.6747	80.7268	81.6587	76.3299			3.13227	94.2369	2.01097	2	86.1065	1.12601	6	79.744	0.753237	7
	3.19607	96.7311	88.1011	88.554	82.6467	81.2408	78.5083	82.7789	77.4582		93.3012		87.5038	85.3815	85.8904	83.2415	79.0543	78.8366			3.19607	95.0161	1.71495	2	86.3463	0.896631	6	80.1598	0.852502	7
	3.26012	98.8061	86.7322	86.9134	80.7875	79.185	80.123	80.5479	76.2534		93.7956		87.2432	85.7671	83.1849	80.4857	79.867	77.7076			3.26012	96.3009	2.50528	2	85.1047	1.05287	6	79.1671	0.610799	7
	3.32418	99.2609	87.1183	88.4777	83.3394	80.58	78.8543	82.7397	77.3805		93.3259		87.9945	86.0884	85.5651	81.9325	81.4924	78.473			3.32418	96.2934	2.96751	2	86.4305	0.764437	6	80.2075	0.756073	7
	3.38798	93.8886	87.8203	89.05	77.9803	81.094	79.6232	82.0744	78.3521		90.6686		86.0626	84.4498	83.1336	80.589	82.5268	78.2243			3.38798	92.2786	1.60997	2	84.7494	1.61422	6	80.3548	0.642925	7
	3.45178	93.7464	87.6799	87.4094	79.7667	79.9927	78.316	80.0391	75.3984		94.5742		88.2245	81.9277	85.2055	79.8829	78.8696	79.6403			3.45178	94.1603	0.413885	2	85.0356	1.4171	6	78.877	0.628779	7
	3.51585	97.1006	86.5918	87.1042	82.6103	79.4787	78.1622	79.8043	76.9141		93.1034		85.3879	86.9237	82.9966	82.4147	80.5135	77.8798			3.51585	95.102	1.99859	2	85.2691	0.818584	6	79.3096	0.698017	7
	3.5799	97.8113	87.2587	86.1122	82.829	80.2863	79.3541	80.7436	77.8469		91.9787		86.7679	82.6024	86.7808	84.7571	79.239	78.4539			3.5799	94.895	2.91626	2	85.3918	0.859761	6	80.0973	0.862195	7
	3.64398	99.2894	87.1534	86.7608	81.3708	79.699	77.4702	78.2779	76.2534		93.9562		87.5345	86.1205	85.6678	81.6052	79.4976	78.0138			3.64398	96.6228	2.66656	2	85.768	0.921872	6	78.6882	0.658658	7
	3.70777	96.589	85.7845	85.7688	79.6938	79.3319	80.1999	79.9609	76.6809		93.4124		88.1938	84.3373	83.9041	80.7441	77.1703	77.1336			3.70777	95.0007	1.58827	2	84.6137	1.15913	6	78.7459	0.641289	7
	3.77183	97.0722	87.8203	86.57	80.1312	79.0382	77.0473	78.7084	75.4761		92.4113		87.0592	85.1084	84.3836	79.3834	80.0332	77.2484			3.77183	94.7418	2.33044	2	85.1788	1.13378	6	78.1336	0.604455	7
	3.8359	97.4702	86.7673	87.4475	81.9905	81.4978	79.0081	80.1957	76.6421		94.5001		85.3419	82.6827	84.2808	79.0389	79.0728	78.2817			3.8359	95.9851	1.48504	2	84.7518	0.890786	6	79.1053	0.570586	7
	3.89997	96.7027	85.9951	86.9134	81.3343	78.7445	78.4698	78.7867	75.2818		93.2888		84.6673	83.2129	82.4658	79.1423	76.8009	76.0046			3.89997	94.9958	1.70691	2	84.0981	0.87436	6	77.6044	0.585769	7
	3.96403	97.0722	85.0474	87.1423	80.4229	78.8913	78.4698	78.6301	77.1084		92.263		85.8019	84.0643	83.4075	80.9335	75.9882	76.8657			3.96403	94.6676	2.4046	2	84.3144	0.944737	6	78.1267	0.617877	7
	4.02783	95.2814	86.2408	86.2648	79.2563	78.3407	77.3549	78.1605	74.349		92.5226		87.3198	83.3735	85.2397	81.1919	79.4791	73.4788			4.02783	93.902	1.37942	2	84.6158	1.20178	6	77.4793	1.03288	7
	4.09188	92.2399	86.9428	86.7226	79.8396	78.4508	76.2015	78.1996	74.6211		92.1394		86.7679	83.8072	82.8425	78.4189	77.7059	74.225			4.09188	92.1897	0.05025	2	84.4871	1.16899	6	76.8318	0.68756	7
	4.1557	96.8732	86.8024	84.4716	81.0427	78.6344	76.9319	80.2348	72.911		91.7316		86.0472	85.4458	82.1233	80.1412	79.7562	76.9805			4.1557	94.3024	2.57084	2	84.3222	0.930993	6	77.9414	0.989468	7
	4.21948	96.6174	85.8547	86.9897	79.2563	80.1762	78.0469	79.8826	75.0486		91.9787		86.3232	85.8313	85.7021	79.2112	80.4027	75.5454			4.21948	94.2981	2.31933	2	84.9929	1.16353	6	78.3305	0.837989	7
	4.28355	96.4184	86.2759	84.9676	80.2042	76.7254	77.3549	77.6908	76.8752		91.954		84.6673	84.1606	82.8596	80.3651	80.6428	76.5978			4.28355	94.1862	2.2322	2	83.8559	0.859674	6	78.036	0.653504	7
	4.34735	95.9636	87.7501	85.7306	79.1105	79.0015	75.6248	77.6125	75.0097		94.1169		85.3879	82.9558	83.887	79.0906	78.297	78.0138			4.34735	95.0403	0.92335	2	84.137	1.20944	6	77.5214	0.605748	7
	4.4114	94.9687	86.3812	85.3491	78.7824	77.7533	75.8939	79.1781	72.7555		95.4147		85.4339	82.4257	84.6747	78.97	76.8378	74.9139			4.4114	95.1917	0.222965	2	83.8412	1.14822	6	76.6147	0.869731	7
	4.47547	95.9352	87.364	85.9596	78.4907	77.2761	75.5863	77.5734	74.3101		91.7686		88.4698	83.9518	83.5103	80.0896	78.9989	76.062			4.47547	93.8519	2.08328	2	84.6244	1.45363	6	77.1281	0.75506	7
	4.53927	92.4105	86.9077	85.8451	79.7667	77.4963	76.7013	76.9863	73.8826		92.6709		87.2125	83.9839	83.1678	81.3813	78.4263	74.8756			4.53927	92.5407	0.130205	2	84.4806	1.14611	6	77.1071	0.922172	7
	4.60333	97.2143	86.2408	85.9977	79.1105	77.9736	75.5863	78.2779	73.3774		93.7091		84.7899	83.5984	81.524	82.5698	77.4658	74.8374			4.60333	95.4617	1.75263	2	83.5435	1.1341	6	77.1554	1.1281	7
	4.6674	95.0256	86.4163	85.2728	79.0376	77.0191	75.0096	76.2818	73.8049		91.8428		86.3385	83.8715	82.0548	77.351	74.6398	75.5645			4.6674	93.4342	1.5914	2	83.8319	1.17167	6	75.6672	0.488127	7
	4.73118	97.2996	85.96	86.7608	79.074	75.8076	75.817	78.0822	71.5119		93.1282		84.7133	81.9116	83.339	78.4017	76.9671	76.5595			4.73118	95.2139	2.08571	2	83.6265	1.15756	6	76.1638	0.864345	7
	4.79503	97.2996	83.2222	85.4254	79.0376	77.2761	76.3168	78.591	73.3385		90.5574		84.6366	84.4177	80.6507	78.6945	79.1836	76.1959			4.79503	93.9285	3.37109	2	82.8983	1.02922	6	77.0852	0.767117	7
	4.85907	97.5839	84.6613	83.9756	77.4335	75.7342	75.817	76.7906	72.9499		93.7709		84.9279	85.751	83.6473	79.7795	77.6321	75.0287			4.85907	95.6774	1.9065	2	83.3994	1.23078	6	76.2474	0.809115	7
	4.92287	95.3383	85.5739	84.6623	78.6365	76.4684	75.5094	76.3601	72.911		91.7439		85.6026	83.3735	81.9521	78.5222	75.4895	74.1676			4.92287	93.5411	1.79717	2	83.3001	1.0939	6	75.6326	0.675536	7
	4.98693	98.4082	85.2229	84.2808	77.8345	74.486	74.702	76.1644	72.3669		90.4956		84.7133	80.1606	81.6781	77.1443	77.6875	74.9713			4.98693	94.4519	3.95629	2	82.315	1.19992	6	75.3604	0.682337	7
	6.25427	102.246	11.8638	9.5765	7.69231	7.45228	7.22799	7.2407	6.33502		115.387		28.3195	17.5582	13.5445	12.4182	14.5364	18.2357			6.25427	108.817	6.57095	2	14.7591	3.04618	6	10.4923	1.74423	7
	6.31798	102.217	11.8989	9.84357	7.69231	7.1953	6.88197	6.88845	6.52934		115.474		27.9975	17.494	13.1849	11.402	12.7632	14.5427			6.31798	108.846	6.6284	2	14.6852	2.98588	6	9.45756	1.26766	7
	6.38205	100.057	11.583	9.42388	7.47357	7.01175	6.95886	6.69276	5.63545		112.261		28.0895	17.6064	13.339	10.6269	11.2671	12.7631			6.38205	106.159	6.1018	2	14.5859	3.0511	6	8.70799	1.04783	7
	6.44585	96.7879	11.8638	9.42388	7.54648	6.8649	6.61284	6.7319	5.94637		114.646		27.5222	17.6867	13.2877	10.3858	10.3251	11.3854			6.44585	105.717	8.92897	2	14.5551	2.95665	6	8.32175	0.857354	7
	6.5099	98.863	11.8287	9.34758	7.40066	6.82819	6.65129	6.41879	5.79091		114.3		27.4149	17.7349	12.8425	10.2652	9.84485	10.4478			6.5099	106.581	7.7184	2	14.4282	2.96682	6	8.03529	0.772905	7
	6.57372	98.0102	11.583	9.42388	7.51003	6.93833	6.65129	6.34051	5.51885		112.52		27.7369	17.9598	12.2774	9.73131	9.05061	9.4336			6.57372	105.265	7.25493	2	14.4152	3.02885	6	7.66636	0.640562	7
	6.63752	96.9016	11.3022	9.19496	7.72876	6.79148	6.42061	6.30137	5.51885		115.746		27.7216	17.1084	12.089	9.78298	9.12449	8.87868			6.63752	106.324	9.42212	2	14.1908	3.00595	6	7.5455	0.631816	7
	6.70157	99.2041	11.3373	9.19496	7.3642	6.8649	6.4975	6.26223	5.67431		114.102		27.0163	17.4297	12.5342	9.54185	8.44108	8.3429			6.70157	106.653	7.449	2	14.1461	2.92927	6	7.37497	0.532948	7
	6.76537	101.336	11.6883	9.38573	7.58294	6.64464	6.45905	6.26223	5.40225		115.449		27.5989	17.5904	12.226	9.55908	8.29331	8.24723			6.76537	108.393	7.05665	2	14.3454	2.98924	6	7.26683	0.551939	7
	6.82943	97.9534	11.9691	9.11866	7.58294	6.57122	6.34371	6.30137	5.59658		113.299		27.4916	16.755	12.2089	9.71409	8.14555	7.53923			6.82943	105.626	7.67266	2	14.1877	2.95375	6	7.17311	0.530763	7
	6.89332	101.109	11.8287	9.38573	7.72876	6.79148	6.15148	6.37965	5.36339		115.696		27.2769	17.1245	11.9521	9.78298	8.10861	7.73058			6.89332	108.403	7.29395	2	14.2161	2.91712	6	7.18688	0.558273	7
RAW DATA
		Concentration (uM)									Concentration (uM)
		Mn									Mn
		0	50	50	50	400	400	400	400		0		50	50	400	400	400	400
		4138	4198	4001	4062	3729	4078	4026	4176		10018		9346	9335	9187	9288	9237	9306
		4130	4093	4042	4056	3653	4009	4013	4124		9513		9337	9096	9016	8971	9082	9311
		4057	4069	3917	4097	3529	4087	4048	4135		9507		9112	9025	9148	9035	8973	8986
		4049	4091	3963	3951	3561	3988	4077	4103		9340		8844	8816	8927	8819	8793	9044
		3896	3990	3991	4044	3528	4124	4012	4149		9134		8586	8961	8668	8544	8530	8533
		4079	4056	4042	4076	3569	4039	4049	4016		9204		8732	8718	8399	8492	8428	8469
		3957	4042	3967	4004	3540	4036	3887	4028		9136		8636	8425	8289	8623	8372	8603
		3900	3926	4008	3919	3469	3981	3966	4067		8702		8390	8323	8275	8383	8025	8214
		3983	3923	3813	3850	3418	3968	3888	3857		8783		8443	8353	8301	8221	8079	8400
		3927	3917	3906	3980	3469	3853	3934	3938		8624		8295	8036	8263	8194	7802	8116
		3910	3923	3829	3869	3445	3884	3861	3984		8528		8321	8102	8108	7945	7840	8143
		3904	3832	3853	3904	3437	3926	3819	3929		8610		8110	8013	8007	8141	7522	8278
		3866	3824	3824	3831	3435	3811	3812	3834		8349		8197	8159	8057	7840	7800	8065
		3810	3868	3757	3851	3449	3780	3842	3845		8150		7996	7968	8106	7977	7605	8084
		3801	3802	3690	3828	3509	3834	3820	3887		8202		7916	8151	8103	7993	7464	8061
		3852	3725	3691	3745	3446	3802	3776	3880		8177		8156	8195	8061	7828	7324	7915
		3713	3847	3720	3718	3426	3759	3762	3770		8240		7866	8096	7816	7947	7433	7782
		3765	3790	3722	3746	3426	3755	3718	3822		8263		7873	8023	7707	7670	7536	8031
		3812	3719	3685	3768	3401	3739	3645	3845		7881		7692	8020	7804	7862	7503	8024
		3775	3700	3642	3682	3372	3746	3553	3749		8211		7932	7771	7747	7914	7367	7930
		3762	3645	3740	3724	3442	3689	3626	3788		8208		7808	8017	7842	7718	7570	7710
		3727	3612	3653	3676	3426	3711	3549	3739		7938		7848	7863	7613	7762	7470	7802
		3760	3664	3584	3584	3472	3652	3606	3730		8200		7892	7719	7466	7485	7264	7592
		3687	3598	3503	3587	3334	3615	3567	3622		8010		7742	7769	7740	7625	7532	7537
		3637	3635	3470	3632	3438	3604	3595	3624		7905		7791	7824	7829	7537	7426	7502
		3671	3547	3470	3519	3435	3577	3506	3587		8167		7544	7654	7555	7546	7466	7762
		3579	3531	3443	3607	3357	3574	3565	3615		8120		7676	7584	7477	7546	7461	7402
		3626	3591	3514	3442	3332	3638	3498	3663		8128		7686	7736	7645	7383	7199	7442
		3607	3609	3481	3523	3406	3512	3574	3601		8139		7521	7619	7305	7573	7338	7432
		3598	3563	3424	3484	3342	3553	3436	3559		7900		7618	7506	7292	7488	7309	7579
		3484	3610	3468	3590	3360	3526	3458	3464		7968		7782	7540	7501	7617	7195	7459
		3594	3547	3406	3464	3324	3445	3494	3543		7989		7512	7562	7161	7539	7349	7506
		3637	3564	3461	3514	3380	3474	3488	3579		7861		7589	7478	7191	7243	7204	7452
		3467	3546	3434	3508	3352	3517	3461	3461		7904		7646	7559	7588	7347	7339	7572
		3511	3432	3386	3491	3341	3393	3409	3471		7991		7347	7555	7501	7351	7159	7641
		3535	3491	3335	3420	3327	3385	3442	3491		7792		7540	7525	7270	7398	7132	7337
		3452	3485	3381	3447	3366	3419	3400	3439		8036		7490	7287	7339	7237	7193	7452
		3430	3445	3383	3421	3300	3423	3404	3429		7852		7545	7603	7319	7448	7314	7549
		3507	3460	3300	3430	3321	3411	3429	3398		7834		7446	7389	7170	7198	7339	7371
		3473	3426	3406	3440	3305	3407	3428	3466		7868		7500	7303	7318	7498	7427	7402
		3393	3409	3338	3414	3364	3408	3467	3424		7816		7389	7424	7234	7460	7169	7275
		3431	3376	3365	3364	3296	3353	3448	3506		7731		7618	7197	7133	7310	7237	7371
		3482	3406	3277	3359	3321	3372	3359	3456		7685		7337	7333	7373	7310	7205	7210
		3332	3452	3321	3380	3299	3337	3282	3436		7699		7376	7417	7177	7395	7124	7283
		3421	3372	3314	3301	3207	3307	3379	3404		7735		7335	7354	7245	7376	7064	7107
		3467	3352	3302	3294	3257	3348	3380	3391		7733		7366	7457	7286	7253	7021	7408
		3412	3370	3274	3305	3206	3341	3380	3484		7866		7496	7364	7306	7198	7090	7230
		3456	3380	3259	3340	3268	3390	3330	3350		7868		7305	7362	7161	7244	7083	7442
		3370	3397	3254	3335	3267	3324	3337	3380		7817		7358	7522	7113	7182	7067	7288
		3249	3419	3333	3382	3436	3322	3341	3443		7722		7707	7506	7611	7417	7337	7677
		3316	3392	3347	3370	3366	3385	3363	3404		7950		7579	7550	7594	7569	7390	7584
		3237	3358	3249	3299	3383	3305	3295	3384		7976		7611	7385	7397	7579	7479	7416
		3275	3310	3191	3266	3369	3365	3328	3400		7814		7661	7357	7404	7703	7385	7404
		3245	3353	3237	3288	3356	3311	3316	3338		7854		7549	7434	7272	7518	7305	7506
		3290	3358	3211	3252	3368	3328	3318	3406		7757		7599	7522	7357	7501	7277	7513
		3219	3411	3307	3233	3398	3295	3392	3387		7639		7513	7356	7317	7496	7415	7535
		3202	3381	3278	3282	3331	3291	3321	3393		7702		7689	7411	7322	7485	7189	7470
		3176	3336	3290	3302	3423	3312	3336	3476		7634		7791	7497	7187	7346	7051	7510
		3266	3375	3324	3282	3344	3305	3356	3394		7562		7331	7477	7236	7462	7314	7253
		3270	3357	3262	3325	3397	3258	3300	3432		7676		7430	7503	7265	7331	7172	7235
		3276	3341	3235	3307	3342	3298	3288	3373		7473		7248	7145	7296	7435	7162	7416
		3268	3366	3216	3329	3373	3232	3294	3296		7618		7297	7259	7233	7201	7285	7311
		3223	3324	3267	3267	3311	3261	3314	3406		7790		7248	7272	7267	7238	7338	7386
		3173	3306	3223	3228	3291	3244	3217	3280		7777		7254	7342	7159	7288	7098	7233
		3242	3232	3230	3254	3291	3266	3201	3342		7713		7496	7414	7035	7126	7204	7210
		3262	3314	3159	3258	3275	3241	3292	3314		7405		7453	7291	7172	7285	7251	7268
		3292	3299	3231	3204	3264	3233	3228	3348		7693		7354	7381	6992	7178	7133	7394
		3259	3296	3222	3324	3331	3251	3214	3246		7684		7507	7277	6981	7224	7023	7275
		3264	3217	3167	3247	3269	3288	3235	3288		7638		7584	7298	7090	7363	7136	7174
		3489	2956	2728	2707	2727	2603	2720	2579		8155		6598	6262	5911	5690	5430	5524
		3518	2849	2621	2743	2724	2601	2555	2573		8091		6522	6225	5840	5806	5414	5226
		3441	2896	2576	2653	2631	2511	2615	2482		7827		6448	6039	5688	5636	5351	5101
		3488	2762	2634	2622	2592	2436	2495	2501		7969		6475	6090	5693	5559	5357	5095
		3510	2790	2584	2581	2585	2430	2487	2416		7792		6313	6057	5637	5512	5274	5121
		3441	2812	2620	2591	2586	2486	2482	2451		7848		6435	6090	5707	5404	5098	5072
		3478	2791	2576	2595	2577	2496	2501	2434		7985		6417	6034	5607	5418	5308	4969
		3432	2753	2593	2567	2565	2400	2398	2449		7916		6328	5896	5553	5469	5095	4900
		3440	2800	2511	2571	2521	2396	2441	2382		7941		6117	5851	5581	5484	4887	4970
		3495	2793	2572	2508	2528	2369	2406	2397		7827		6122	5795	5540	5303	4773	4745
		3381	2797	2572	2533	2387	2309	2404	2313		7841		6204	5637	5559	5191	4833	4684
		3502	2747	2506	2514	2460	2382	2379	2309		7665		6102	5735	5380	5025	4765	4628
		3444	2763	2502	2492	2451	2294	2389	2327		7727		6147	5674	5468	5210	4939	4640
		3400	2728	2502	2467	2432	2349	2339	2306		7872		5895	5729	5324	5123	4817	4657
		3447	2665	2456	2465	2412	2217	2372	2272		7654		5999	5455	5435	5115	4803	4615
		3443	2647	2485	2386	2427	2298	2295	2254		7857		6051	5619	5309	5053	4741	4609
		3475	2632	2442	2425	2454	2286	2341	2269		7765		5923	5671	5334	5163	4746	4496
		3401	2667	2504	2412	2389	2250	2250	2219		7728		6072	5637	5239	5009	4793	4530
		3424	2630	2466	2419	2425	2276	2301	2270		7554		6032	5505	5284	5068	4786	4504
		3377	2634	2438	2362	2380	2262	2318	2222		7696		6107	5649	5222	4956	4777	4474
		3424	2628	2415	2384	2320	2249	2276	2229		7681		5991	5553	5215	4974	4600	4467
		3501	2650	2442	2399	2382	2210	2244	2145		7538		5890	5534	5295	5062	4612	4472
		3495	2630	2426	2407	2346	2247	2232	2210		7583		5878	5570	5186	5084	4784	4393
		3467	2600	2412	2352	2296	2269	2245	2206		7586		5792	5542	5119	4878	4726	4371
		3489	2638	2461	2429	2407	2206	2197	2154		7641		6019	5495	5262	4860	4628	4439
		3456	2633	2363	2413	2345	2207	2237	2163		7606		5874	5511	5194	5010	4504	4353
		3458	2601	2324	2341	2347	2196	2229	2228		7576		5977	5465	5200	4904	4565	4423
		3384	2603	2431	2363	2324	2152	2224	2157		7429		5750	5516	5190	4871	4634	4361
		3431	2572	2369	2329	2333	2186	2243	2174		7537		5739	5451	5119	4902	4631	4436
		3493	2572	2389	2394	2302	2183	2212	2169		7565		5785	5435	5110	4943	4605	4341
		3374	2613	2419	2325	2322	2156	2194	2165		7655		5779	5450	5248	4943	4557	4239
		3404	2601	2386	2287	2239	2136	2183	2102		7655		5909	5462	5119	4913	4639	4262
		3509	2570	2388	2316	2244	2127	2221	2073		7702		5831	5570	5147	4855	4562	4254
		3421	2532	2358	2280	2306	2118	2184	2116		7842		5616	5441	5235	4926	4537	4357
		3384	2592	2393	2281	2279	2129	2133	2095		7516		5924	5414	4992	4809	4402	4340
		3328	2501	2351	2325	2243	2157	2166	2071		7604		5914	5600	5062	4807	4497	4212
		3474	2552	2363	2298	2227	2141	2129	2096		7396		5890	5370	5289	4757	4495	4233
		3410	2550	2333	2300	2268	2132	2134	2092		7675		5845	5536	5191	4953	4462	4270
		3308	2558	2331	2282	2253	2122	2118	2067		7655		5801	5346	5031	4954	4532	4295
		3326	2515	2295	2319	2210	2132	2162	2034		7671		5785	5458	5021	4856	4568	4355
		3398	2515	2363	2272	2197	2109	2151	2055		7632		5829	5469	4980	4780	4444	4097
		3381	2585	2327	2316	2263	2169	2125	2082		7709		5726	5512	5009	4830	4552	4218
		3490	2547	2264	2281	2193	2114	2145	2032		7724		5796	5396	5060	4923	4464	4230
		3443	2510	2344	2304	2200	2061	2074	2022		7636		5791	5522	4966	4677	4456	4035
		3446	2497	2275	2288	2229	2067	2101	2054		7798		5737	5376	5119	4874	4416	4096
		3411	2529	2282	2277	2238	2043	2106	2058		7487		5609	5262	4938	4708	4351	4101
		3504	2508	2293	2215	2208	2053	2075	2035		7360		5717	5271	5038	4725	4444	4056
		3324	2479	2319	2213	2244	2061	2074	2025		7585		5694	5272	5011	4661	4314	4068
		3464	2469	2278	2240	2202	2077	2065	1963		7505		5580	5148	5060	4681	4452	4191
		3424	2464	2272	2254	2235	2053	2082	2009		7477		5891	5341	5172	4791	4473	4055
		3386	2528	2293	2229	2142	2087	2094	2024		7462		5739	5384	4945	4687	4421	3989
		3403	2510	2321	2267	2213	2042	2115	1993		7549		5707	5315	5016	4833	4280	4120
		3476	2471	2278	2216	2157	2084	2058	1962		7589		5690	5339	4858	4673	4324	4061
		3492	2482	2319	2286	2195	2051	2114	1991		7551		5739	5359	4997	4757	4412	4101
		3303	2502	2334	2139	2209	2071	2097	2016		7336		5613	5257	4855	4679	4468	4088
		3298	2498	2291	2188	2179	2037	2045	1940		7652		5754	5100	4976	4638	4270	4162
		3416	2467	2283	2266	2165	2033	2039	1979		7533		5569	5411	4847	4785	4359	4070
		3441	2486	2257	2272	2187	2064	2063	2003		7442		5659	5142	5068	4921	4290	4100
		3493	2483	2274	2232	2171	2015	2000	1962		7602		5709	5361	5003	4738	4304	4077
		3398	2444	2248	2186	2161	2086	2043	1973		7558		5752	5250	4900	4688	4178	4031
		3415	2502	2269	2198	2153	2004	2011	1942		7477		5678	5298	4928	4609	4333	4037
		3429	2472	2292	2249	2220	2055	2049	1972		7646		5566	5147	4922	4589	4281	4091
		3402	2450	2278	2231	2145	2041	2013	1937		7548		5522	5180	4816	4595	4158	3972
		3415	2423	2284	2206	2149	2041	2009	1984		7465		5596	5233	4871	4699	4114	4017
		3352	2457	2261	2174	2134	2012	1997	1913		7486		5695	5190	4978	4714	4303	3840
		3245	2477	2273	2190	2137	1982	1998	1920		7455		5659	5217	4838	4553	4207	3879
		3408	2473	2214	2223	2142	2001	2050	1876		7422		5612	5319	4796	4653	4318	4023
		3399	2446	2280	2174	2184	2030	2041	1931		7442		5630	5343	5005	4599	4353	3948
		3392	2458	2227	2200	2090	2012	1985	1978		7440		5522	5239	4839	4666	4366	4003
		3376	2500	2247	2170	2152	1967	1983	1930		7615		5569	5164	4899	4592	4239	4077
		3341	2461	2237	2161	2118	1974	2023	1872		7720		5572	5131	4945	4585	4160	3915
		3375	2489	2253	2153	2105	1966	1982	1912		7425		5770	5226	4877	4650	4277	3975
		3251	2476	2250	2188	2111	1995	1967	1901		7498		5688	5228	4857	4725	4246	3913
		3420	2457	2254	2170	2124	1966	2000	1888		7582		5530	5204	4761	4794	4194	3911
		3343	2462	2235	2168	2098	1951	1949	1899		7431		5631	5221	4792	4491	4041	3949
		3423	2449	2274	2169	2065	1972	1995	1840		7535		5525	5099	4867	4552	4167	4001
		3423	2371	2239	2168	2105	1985	2008	1887		7327		5520	5255	4710	4569	4287	3982
		3433	2412	2201	2124	2063	1972	1962	1877		7587		5539	5338	4885	4632	4203	3921
		3354	2438	2219	2157	2083	1964	1951	1876		7423		5583	5190	4786	4559	4087	3876
		3462	2428	2209	2135	2029	1943	1946	1862		7322		5525	4990	4770	4479	4206	3918
		3597	338	251	211	203	188	185	163		9336		1847	1093	791	721	787	953
		3596	339	258	211	196	179	176	168		9343		1826	1089	770	662	691	760
		3520	330	247	205	191	181	171	145		9083		1832	1096	779	617	610	667
		3405	338	247	207	187	172	172	153		9276		1795	1101	776	603	559	595
		3478	337	245	203	186	173	164	149		9248		1788	1104	750	596	533	546
		3448	330	247	206	189	173	162	142		9104		1809	1118	717	565	490	493
		3409	322	241	212	185	167	161	142		9365		1808	1065	706	568	494	464
		3490	323	241	202	187	169	160	146		9232		1762	1085	732	554	457	436
		3565	333	246	208	181	168	160	139		9341		1800	1095	714	555	449	431
		3446	341	239	208	179	165	161	144		9167		1793	1043	713	564	441	394
		3557	337	246	212	185	160	163	138		9361		1779	1066	698	568	439	404

## Sheet: Fig8I
Elen-T224A-G58N
lipid to protein ratio 50
Calcium transport
		Fura2 380 nm (unbound)									Fura2 340nm (bound)									340/380
NORMALIZED DATA																															Concentrations
		Calcium (uM)									Calcium (uM)									Calcium (uM)											Mean	SEM	N
	Time normalized (min)	0	50	50	150	150	150	500	500		0	50	50	150	150	150	500	500		0	50	50	150	150	150	500	500			Time (min)	0 μM Ca2+			50 μM Ca2+			150 μM Ca2+			500 μM Ca2+
	-11.6163	104.044	159.583	146.93	126.437	122.441	116.547	141.593	168.586		126.915	106.883	101.636	100.344	103.473	93.0926	98.5915	78.9386		121.982	66.976	69.1732	79.3627	84.5089	79.8758	69.6303	46.8239			-11.6163	105.08	3.35292	9	79.0982	3.02618	10	77.9814	3.39302	11	69.5804	4.50157	10
	-11.2485	132.721	117.5	144.298	116.858	130.315	124.46	143.805	168.063		116.77	121.66	105.317	98.6254	92.5046	88.0691	98.7676	90.8789		87.982	103.54	72.9856	84.3975	70.9854	70.7607	68.6815	54.0744			-11.2485	102.184	4.58971	9	87.703	3.90818	10	74.1124	2.91399	11	70.2405	3.77549	10
	-10.8808	117.279	139.167	153.947	127.969	116.535	121.942	151.327	156.545		126.708	115.385	113.906	94.1581	96.1609	87.5981	83.9789	95.3566		108.039	82.9111	73.9902	73.5786	82.5164	71.8356	55.4948	60.9134			-10.8808	104.343	1.27963	9	82.5104	2.53587	10	75.3788	2.92179	11	73.0226	4.86678	10
	-10.5131	125	120	121.053	120.307	118.11	103.597	141.593	166.492		105.383	108.704	117.996	93.4708	108.775	88.697	107.746	84.9088		84.3064	90.587	97.4749	77.6939	92.0963	85.6173	76.096	50.9987			-10.5131	104.848	4.53093	9	89.5264	2.67087	10	78.4494	3.45201	11	71.3848	4.59542	10
	-10.1454	129.412	163.333	144.737	111.877	123.622	111.871	140.708	149.215		113.458	107.085	108.18	97.7663	102.559	84.7724	96.6549	86.2355		87.6717	65.5623	74.7425	87.387	82.9621	75.7772	68.6919	57.7929			-10.1454	103.483	2.72809	9	81.5046	2.9079	10	77.8427	3.09586	11	69.847	3.89379	10
	-9.7776	119.118	112.917	123.684	126.82	118.504	108.633	128.761	156.021		96.2733	103.846	110.634	90.0344	88.8483	82.5746	97.3592	93.6982		80.822	91.9671	89.4487	70.9939	74.9749	76.0124	75.6123	60.0549			-9.7776	102.047	4.02618	9	87.1454	3.52097	10	75.357	2.76407	11	73.2477	3.52614	10
	-9.4099	120.221	117.083	122.368	121.839	115.748	103.597	130.531	152.356		115.942	112.348	108.793	92.0962	95.064	84.4584	87.8521	83.2504		96.4411	95.9557	88.9065	75.5884	82.1301	81.5258	67.3037	54.642			-9.4099	104.52	2.24886	9	87.1453	2.61461	10	78.9781	3.85371	11	71.3446	3.94002	10
	-9.0422	116.176	131.25	124.561	109.579	111.811	116.547	139.823	143.455		114.079	109.312	106.953	72.8522	92.8702	80.3768	92.2535	79.1045		98.1943	83.2851	85.8636	66.484	83.06	68.9652	65.9788	55.1422			-9.0422	104.281	2.69603	9	82.505	2.81375	10	75.1942	3.74334	11	69.7056	4.44451	10
	-8.6745	105.515	120.833	146.053	114.176	107.874	99.2806	120.796	148.168		110.973	97.9757	104.294	84.0206	93.6015	90.4239	95.4225	82.5871		105.173	81.0833	71.4088	73.5885	86.7692	91.0791	78.9945	55.739			-8.6745	103.362	2.96513	9	82.0282	2.52519	10	77.531	3.09278	11	71.5514	3.98739	10
	-8.30677	112.132	121.667	124.123	120.307	108.661	91.0072	114.602	147.644		102.484	100.607	114.519	90.378	85.3748	83.6735	97.7113	76.4511		91.396	82.6909	92.263	75.1231	78.5695	91.9416	85.2616	51.7807			-8.30677	106.092	2.6848	9	84.0889	2.45811	10	75.4592	2.92172	11	70.9682	4.74892	10
	-7.93903	120.956	111.25	124.561	94.2529	96.063	101.079	120.796	142.408		114.907	103.239	100.204	87.457	84.6435	72.9984	84.507	83.0846		94.999	92.799	80.4459	92.7898	88.1125	72.2191	69.9582	58.3425			-7.93903	101.239	2.08381	9	85.9567	3.44113	10	78.2247	4.27347	11	74.6546	4.25913	10
	-7.57132	109.191	123.75	139.912	106.897	115.748	112.59	118.142	152.88		113.872	93.9271	104.09	92.9553	85.0091	78.179	91.5493	78.607		104.286	75.9007	74.3966	86.9582	73.4433	69.4369	77.4912	51.4176			-7.57132	104.687	2.86938	9	83.5449	3.09806	10	76.5965	4.02277	11	69.8019	4.76117	10
	-7.20362	94.4853	113.333	121.491	109.195	129.134	107.914	134.071	138.743		107.66	106.073	99.591	87.9725	93.7843	75.8242	88.7324	74.461		113.944	93.5937	81.9738	80.5643	72.6256	70.2637	66.1832	53.6681			-7.20362	104.259	2.43272	9	83.5596	2.35296	10	74.7476	4.05026	11	70.4539	3.45188	10
	-6.83583	101.838	122.5	121.053	112.644	107.48	103.237	138.496	134.031		103.727	109.514	101.84	87.8007	82.8154	72.9984	90.3169	75.4561		101.854	89.3993	84.1291	77.9455	77.0517	70.7093	65.2128	56.2973			-6.83583	104.447	2.59726	9	83.6054	3.25917	10	74.0934	2.76473	11	69.8696	3.9692	10
	-6.46813	105.147	138.333	113.158	127.586	116.142	83.0935	126.106	128.272		113.251	103.036	99.7955	82.9897	101.097	77.237	89.9648	73.9635		107.707	74.4842	88.1914	65.046	87.0461	92.9519	71.3405	57.6614			-6.46813	99.8405	2.71377	9	84.2908	3.13982	10	77.0962	3.38718	11	70.4968	4.01515	10
	-6.10043	102.941	126.667	127.632	108.429	104.724	123.381	120.354	142.932		95.4451	106.073	102.454	71.9931	82.8154	75.3532	87.1479	81.0945		92.7181	83.7417	80.2732	66.3965	79.0793	61.0735	72.4096	56.7365			-6.10043	101.361	3.12	9	84.321	2.45951	10	73.5281	3.25082	11	68.9902	4.4744	10
	-5.73272	91.1765	128.75	125.877	111.111	100.394	101.079	141.15	147.644		105.176	92.7126	100.818	81.0997	87.7514	68.9168	96.4789	77.2803		115.354	72.0097	80.0923	72.9897	87.4072	68.181	68.3518	52.3423			-5.73272	105.158	4.39957	9	82.4699	2.75092	10	80.559	3.37659	11	70.4748	3.98458	10
	-5.365	97.0588	115	117.544	115.326	107.087	96.7626	128.319	135.079		104.762	97.7733	94.4785	87.457	82.2669	79.5918	81.6901	67.9934		107.937	85.0202	80.3773	75.8348	76.8228	82.2548	63.662	50.3362			-5.365	105.566	3.81144	9	84.0178	3.51183	10	77.1145	3.59408	11	67.1685	4.66087	10
	-4.99728	105.882	102.083	104.386	103.831	109.843	89.2086	123.894	135.602		110.559	103.239	103.885	77.6632	87.9342	75.6672	84.1549	69.9834		104.417	101.132	99.5205	74.7974	80.0548	84.8205	67.9251	51.6094			-4.99728	101.324	2.72838	9	90.6702	3.70992	10	76.3837	3.79527	11	70.2961	4.69265	10
	-3.88578	100.368	101.25	107.456	122.605	110.63	126.978	113.274	138.743		108.696	107.287	102.249	90.2062	87.7514	80.6907	86.7958	81.4262		108.297	105.963	95.1546	73.5744	79.3197	63.5468	76.6244	58.6883			-3.88578	104.552	2.75173	9	87.0542	4.07547	10	73.966	3.69242	11	70.7788	5.07281	10
	-3.51823	110.294	104.167	110.965	106.13	115.354	105.036	123.894	160.209		110.145	103.441	95.91	87.2852	88.8483	81.9466	96.3028	78.7728		99.8647	99.3036	86.4327	82.2435	77.022	78.0177	77.7301	49.1686			-3.51823	103.474	2.9867	9	83.4158	3.74983	10	75.1506	3.1818	11	69.5106	4.88086	10
	-3.15053	109.559	127.5	119.737	101.533	95.2756	113.669	137.611	139.267		100	88.8664	99.182	77.3196	96.1609	79.7488	88.3803	72.9685		91.2752	69.6991	82.8333	76.1525	100.929	70.1588	64.2249	52.3947			-3.15053	105.078	2.92269	9	80.2502	3.87552	10	77.2337	4.15366	11	69.5098	5.44117	10
	-2.78282	107.353	136.667	119.737	119.923	104.724	99.2806	122.566	138.22		97.9296	97.166	96.9325	88.8316	84.8263	83.8305	93.838	81.4262		91.2221	71.0971	80.9546	74.0736	80.9996	84.4379	76.561	58.9106			-2.78282	102.566	2.01489	9	81.046	4.35692	10	74.9838	4.20206	11	70.6834	4.59266	10
	-2.4151	115.441	112.917	113.596	117.625	118.11	100	125.221	131.937		100.621	100.202	98.5685	82.9897	95.064	81.9466	96.3028	85.0746		87.1622	88.7402	86.7707	70.5548	80.4875	81.9466	76.9061	64.4812			-2.4151	100.372	2.35879	9	84.7807	4.61735	10	74.8341	4.38547	11	69.0577	4.06129	10
	-2.04738	104.779	112.917	125	109.579	102.362	94.964	118.142	124.607		101.035	99.5951	96.319	83.1615	91.042	83.5165	68.838	89.5522		96.4266	88.2023	77.0552	75.8921	88.9411	87.9454	58.2674	71.8676			-2.04738	98.0308	2.56033	9	79.0413	3.68811	10	76.1459	3.82752	11	68.0133	5.26298	10
	-1.67968	99.6324	114.167	121.053	96.9349	98.8189	96.4029	114.602	146.073		91.7184	100.405	98.5685	94.5017	86.106	78.6499	88.3803	74.7927		92.0569	87.9459	81.4262	97.4899	87.1352	81.5846	77.1195	51.2022			-1.67968	98.3614	2.90115	9	80.5028	2.99843	10	76.4307	4.8188	11	66.6627	4.24296	10
	-1.31193	110.294	118.75	112.719	118.008	108.268	104.317	111.504	132.461		96.8944	100.202	91.82	80.9278	84.2779	86.3422	85.9155	76.9486		87.8509	84.381	81.459	68.5785	77.8421	82.7694	77.0512	58.0916			-1.31193	101.733	3.33329	9	80.109	3.24167	10	76.5124	3.9285	11	68.7996	4.76717	10
	0	100	100	100	100	100	100	100	100		100	100	100	100	100	100	100	100		100	100	100	100	100	100	100	100			0	100	0	9	100	0	10	100	0	11	100	0	10
	0.367767	111.029	101.25	89.9123	78.5441	85.0394	76.9784	94.2478	89.0052		100	117.004	115.133	99.6564	107.861	89.325	117.077	101.161		90.0662	115.56	128.05	126.88	126.837	116.039	124.223	113.657			0.367767	101.348	2.51853	9	114.68	2.34939	10	113.389	3.53323	11	106.618	3.34017	10
	0.735467	107.721	89.5833	114.912	72.4138	62.2047	70.8633	76.1062	87.9581		111.594	105.263	94.0695	104.639	108.044	95.2904	113.732	110.282		103.596	117.503	81.862	144.502	173.691	134.471	149.439	125.38			0.735467	99.9408	2.74608	9	105.368	3.68695	10	120.975	6.49928	11	118.663	4.52762	10
	1.10318	113.971	92.0833	80.7018	91.5709	61.0236	63.3094	76.1062	77.4869		98.1366	116.397	105.726	96.2199	115.174	95.7614	111.268	110.614		86.107	126.404	131.008	105.077	188.736	151.259	146.2	142.751			1.10318	100.966	3.0855	9	114.455	3.42699	10	125.209	7.69031	11	121.401	5.52325	10
	1.4709	100	85.8333	111.842	75.8621	76.7717	60.0719	75.6637	76.9634		94.617	101.822	115.133	103.093	104.753	100.628	113.556	102.653		94.617	118.627	102.942	135.895	136.448	167.512	150.08	133.38			1.4709	101.449	2.39327	9	117.368	4.04879	10	127.556	5.53953	11	126.288	4.85505	10
	1.8386	87.5	82.9167	85.0877	83.1418	85.0394	60.0719	79.2035	79.5812		88.6128	115.587	117.178	110.653	112.98	112.559	118.134	113.101		101.272	139.401	137.714	133.089	132.856	187.373	149.152	142.121			1.8386	103.075	3.53214	9	117.407	4.53526	10	125.025	7.3524	11	134.138	4.90511	10
	2.20632	101.103	85	85.0877	72.7969	81.1024	64.0288	79.646	89.0052		112.008	123.077	101.431	105.67	114.442	98.5871	105.81	100.995		110.786	144.796	119.208	145.157	141.109	153.973	132.85	113.471			2.20632	106.94	1.99455	9	121.412	4.07423	10	126.922	4.17715	11	131.289	5.0854	10
	2.57402	92.2794	90	92.5439	86.2069	68.8976	67.2662	81.4159	74.3455		104.348	109.919	120.245	110.309	114.26	109.89	118.134	114.594		113.078	122.132	129.933	127.959	165.84	163.366	145.099	154.137			2.57402	103.044	3.03662	9	118.998	3.27028	10	129.954	5.83818	11	137.004	4.54817	10
	2.94175	97.7941	83.3333	82.4561	72.7969	66.9291	67.9856	73.4513	79.0576		101.656	107.085	110.838	97.5945	115.905	104.082	119.718	116.584		103.949	128.502	134.421	134.064	173.176	153.094	162.99	147.467			2.94175	100.303	3.00068	9	122.228	3.88113	10	136.339	5.06556	11	138.39	6.59726	10
	3.30948	102.206	92.9167	90.3509	64.3678	74.8031	61.8705	70.7965	82.199		96.0663	113.563	120.041	100.515	111.517	105.495	113.028	108.126		93.9929	122.22	132.861	156.158	149.081	170.509	159.652	131.542			3.30948	100.261	3.45891	9	120.35	2.6578	10	134.627	5.31627	11	137.625	8.23063	10
	3.67722	99.6324	78.75	94.7368	75.4789	70.4724	55.7554	67.2566	71.2042		100.414	111.741	124.949	113.058	108.775	104.553	116.197	123.549		100.785	141.893	131.89	149.788	154.351	187.52	172.767	173.514			3.67722	98.2634	1.17735	9	128.09	3.27165	10	136.921	6.83412	11	150.866	5.36625	10
	4.04493	94.4853	85	79.8246	73.9464	69.2913	57.9137	69.0265	72.2513		101.656	124.089	112.679	104.296	113.894	105.338	124.648	107.297		107.59	145.987	141.158	141.042	164.37	181.887	180.58	148.505			4.04493	102.996	3.06383	9	122.382	4.00011	10	138.271	6.48286	11	155.825	5.62398	10
	4.41262	90.4412	93.3333	93.8596	70.4981	67.3228	56.8345	65.0442	55.4974		102.07	114.17	123.722	107.216	113.346	97.4882	126.937	124.876		112.858	122.325	131.816	152.084	168.361	171.53	195.154	225.012			4.41262	101.937	2.4457	9	125.03	2.98438	10	139.799	5.7656	11	162.937	11.1234	10
	4.78033	88.6029	95	76.3158	68.5824	74.4094	51.7986	73.0088	67.0157		105.383	123.279	129.039	109.45	119.196	108.948	119.718	108.955		118.939	129.768	169.085	159.589	160.189	210.331	163.978	162.582			4.78033	104.199	2.37786	9	130.24	4.71259	10	144.865	8.24344	11	162.444	7.60105	10
	5.14805	92.6471	80.8333	90.7895	76.2452	71.2598	49.2806	68.1416	67.0157		93.5818	113.968	108.384	111.856	111.7	117.739	117.782	121.393		101.009	140.991	119.38	146.705	156.751	238.916	172.848	181.141			5.14805	103.526	2.099	9	126.716	2.59268	10	147.899	9.68725	11	165.813	7.60749	10
	5.51577	100.368	69.1667	87.2807	61.3027	61.811	52.1583	63.2743	56.0209		93.5818	118.623	119.018	104.467	119.378	99.2151	118.31	119.569		93.239	171.504	136.363	170.412	193.135	190.219	186.979	213.436			5.51577	99.3484	3.05713	9	127.719	5.81993	10	148.664	7.81703	11	171.126	8.06571	10
	5.88348	98.1618	73.3333	77.193	69.7318	61.4173	60.7914	55.7522	71.7277		90.8903	107.895	123.517	107.904	117.55	93.7206	122.007	130.182		92.5923	147.129	160.011	154.741	191.396	154.168	218.838	181.495			5.88348	102.221	2.31637	9	134.256	4.29719	10	146.014	5.81569	11	169.402	8.46104	10
	6.2512	94.1176	86.6667	72.3684	76.6284	61.811	54.3165	61.9469	56.5445		96.2733	114.372	113.701	110.309	106.581	96.3893	134.507	115.257		102.29	131.968	157.115	143.954	172.431	177.458	217.133	203.834			6.2512	101.293	1.56878	9	131.76	4.4552	10	149.423	5.86272	11	171.448	9.877	10
	6.6189	78.6765	84.1667	74.5614	74.7126	59.8425	49.2806	62.8319	59.6859		96.4803	112.146	134.356	105.842	125.96	106.436	113.38	120.232		122.629	133.242	180.195	141.665	210.485	215.98	180.45	201.442			6.6189	105.603	3.65814	9	134.285	5.34496	10	150.841	10.4024	11	172.72	7.73607	10
	6.98662	101.471	89.5833	79.8246	67.8161	57.874	62.2302	64.6018	67.5393		108.696	123.077	112.065	119.072	117.367	95.2904	123.239	125.041		107.12	137.388	140.39	175.581	202.798	153.126	190.768	185.139			6.98662	104.034	2.48439	9	135.795	3.23832	10	159.044	6.08796	11	175.116	4.6386	10
	7.35435	91.1765	90	92.9825	68.5824	57.4803	46.0432	59.292	78.534		101.656	119.231	129.652	118.9	112.98	106.593	139.085	130.182		111.494	132.479	139.437	173.369	196.554	231.508	234.575	165.766			7.35435	104.749	1.73609	9	132.062	3.34506	10	159.724	9.52716	11	170.226	9.4524	10
	7.72207	106.25	77.5	71.0526	69.3487	56.6929	55.7554	50.4425	72.2513		92.1325	108.502	124.335	114.777	115.722	105.181	128.169	118.74		86.7129	140.003	174.991	165.507	204.121	188.646	254.089	164.343			7.72207	95.7446	1.4988	9	138.684	4.7049	10	153.185	8.86576	11	178.976	11.3611	10
	8.0898	98.5294	98.75	88.5965	70.4981	68.5039	38.8489	76.5487	78.0105		95.8592	111.336	122.699	104.639	116.636	106.907	125.176	129.685		97.2899	112.745	138.492	148.428	170.262	275.188	163.525	166.24			8.0898	100.731	1.91956	9	133.61	3.8027	10	160.052	12.4701	11	170.39	7.76345	10
	8.4575	84.9265	83.3333	92.9825	60.5364	52.3622	56.4748	47.7876	51.8325		96.6874	118.826	124.949	108.247	114.808	113.658	117.254	120.066		113.848	142.591	134.379	178.814	219.257	201.254	245.364	231.643			8.4575	103.617	4.64355	9	133.516	3.55946	10	161.154	8.88662	11	181.111	11.3104	10
	8.8252	104.044	77.9167	82.4561	79.6935	49.2126	62.9496	45.1327	69.6335		102.899	117.206	112.883	112.371	122.121	107.535	119.718	121.559		98.899	150.425	136.901	141.004	248.149	170.828	265.258	174.57			8.8252	104.775	3.93696	9	133.761	3.27254	10	162.25	10.4346	11	184.54	13.8306	10
	9.19292	91.1765	83.75	79.386	48.659	55.9055	51.7986	55.3097	59.6859		101.656	108.097	124.131	113.574	107.313	111.774	138.204	124.71		111.494	129.071	156.364	233.408	191.954	215.786	249.873	208.944			9.19292	104.43	4.01928	9	142.767	4.8183	10	169.709	11.6979	11	192.695	9.36455	10
	9.56062	96.6912	84.1667	70.1754	52.1073	42.126	43.5252	63.2743	54.4503		111.594	118.826	123.313	115.292	119.927	107.692	129.577	116.915		115.413	141.179	175.721	221.259	284.686	247.425	204.787	214.72			9.56062	104.407	2.60177	9	136.595	5.83148	10	179.46	15.285	11	189.789	6.68236	10
	9.92833	95.9559	85.4167	81.5789	51.7241	62.5984	52.1583	58.4071	54.9738		103.106	120.04	123.108	103.608	110.238	110.675	127.113	120.564		107.451	140.535	150.907	200.309	176.103	212.191	217.632	219.311			9.92833	98.2618	2.20661	9	138.25	3.25538	10	167.566	7.77292	11	188.929	8.06669	10
	10.296	87.5	85	80.2632	72.0307	49.2126	38.4892	65.4867	49.2147		91.3043	116.194	111.452	117.869	113.894	110.361	118.486	124.212		104.348	136.699	138.858	163.638	231.433	286.732	180.931	252.389			10.296	100.824	1.62407	9	136.976	2.67149	10	172.747	14.253	11	191.124	11.0572	10
	10.6638	115.809	77.9167	77.193	66.6667	66.5354	49.2806	63.2743	54.9738		95.8592	107.692	124.949	110.309	115.905	101.413	125.352	118.74		82.7737	138.215	161.866	165.464	174.2	205.787	198.109	215.993			10.6638	102.829	3.9749	9	144.578	4.78035	10	164.322	6.0276	11	195.334	8.05128	10
	11.0315	93.0147	73.75	64.9123	51.341	53.5433	47.1223	54.8673	57.5916		103.52	117.814	119.427	103.093	119.013	109.89	129.577	117.081		111.294	159.747	183.983	200.8	222.274	233.202	236.165	203.296			11.0315	102.549	3.69234	9	145.247	5.31887	10	171.799	10.7031	11	195.673	10.641	10
	11.3992	112.868	77.5	87.2807	61.3027	57.874	56.1151	66.3717	62.3037		93.3747	128.745	133.333	119.931	121.389	113.03	127.113	133.665		82.7294	166.123	152.764	195.638	209.748	201.425	191.516	214.538			11.3992	98.9391	4.04513	9	144.171	4.38096	10	170.363	8.72446	11	197.766	8.97634	10
	11.7669	77.2059	81.25	74.1228	67.0498	57.874	37.0504	58.8496	58.6387		102.07	124.089	127.812	107.045	119.013	100.628	126.937	125.373		132.205	152.725	172.433	159.649	205.641	271.598	215.697	213.806			11.7669	107.046	4.84098	9	145.349	4.32824	10	169.668	12.1489	11	196.629	6.82831	10
	12.1346	91.9118	85.8333	81.5789	61.6858	68.1102	51.7986	53.5398	74.8691		96.6874	111.538	108.18	102.749	117.367	101.57	122.887	123.217		105.196	129.948	132.608	166.568	172.32	196.086	229.525	164.577			12.1346	104.19	1.7101	9	141.411	3.29842	10	159.146	6.52591	11	188.47	8.06508	10
	12.5023	113.603	80.4167	65.3509	57.0881	66.1417	36.3309	53.5398	52.356		97.9296	118.219	117.382	103.093	127.788	117.582	127.113	126.866		86.2034	147.008	179.619	180.585	193.203	323.643	237.417	242.313			12.5023	104.659	2.87568	9	146.118	5.31457	10	175.942	16.0041	11	204.664	11.305	10
	12.87	100.368	95.8333	82.8947	63.2184	51.9685	45.3237	58.8496	67.5393		105.797	126.113	125.562	116.838	117.733	108.791	123.944	118.076		105.41	131.597	151.472	184.817	226.547	240.031	210.611	174.826			12.87	105.291	3.94058	9	140.423	1.97123	10	176.338	10.1418	11	197.916	7.29058	10
	13.2377	88.2353	75.4167	66.2281	48.659	51.9685	43.1655	56.1947	52.8796		96.2733	117.206	124.54	107.56	113.711	98.5871	114.965	121.061		109.11	155.412	188.047	221.049	218.808	228.394	204.583	228.938			13.2377	108.8	2.34149	9	151.151	6.38525	10	176.695	10.385	11	196.265	7.38944	10
	13.6055	94.1176	84.1667	74.5614	55.9387	56.6929	53.2374	57.0796	50.7853		90.6832	126.113	125.767	111.34	127.239	108.634	129.754	120.398		96.3509	149.838	168.676	199.04	224.436	204.056	227.32	237.072			13.6054	103.065	3.1571	9	152.623	3.57542	10	178.47	9.92487	11	207.743	10.4684	10
	13.9732	91.5441	79.1667	81.1404	59.387	56.2992	46.0432	57.9646	52.356		98.7578	121.66	122.29	101.203	114.625	112.559	132.218	120.564		107.88	153.676	150.715	170.412	203.6	244.464	228.102	230.277			13.9732	103.558	2.38963	9	146.317	3.13584	10	176.968	8.54091	11	203.726	10.3183	10
	14.3408	87.8676	84.1667	68.4211	55.9387	55.9055	43.8849	58.4071	63.3508		107.453	122.874	132.924	111.684	121.207	106.122	123.768	127.032		122.29	145.989	194.274	199.654	216.806	241.82	211.905	200.521			14.3408	109.298	3.5836	9	150.206	5.78371	10	176.966	10.0595	11	196.915	7.3282	10
	14.7086	94.4853	77.9167	74.1228	62.4521	54.7244	51.0791	50.4425	47.644		97.1014	120.04	131.493	112.371	127.605	112.873	126.232	117.247		102.769	154.063	177.399	179.932	233.178	220.976	250.25	246.09			14.7086	97.8099	2.03615	9	149.688	4.6772	10	177.294	10.3729	11	211.97	9.51174	10
	15.0763	102.574	60.4167	68.4211	74.3295	49.6063	53.9568	46.0177	46.5969		103.106	134.413	126.585	119.759	127.057	101.57	122.183	125.373		100.519	222.477	185.009	161.12	256.13	188.243	265.513	269.059			15.0763	101.281	2.295	9	158.776	9.20964	10	180.219	9.33152	11	214.024	12.5976	10
	15.444	87.5	63.3333	68.4211	52.1073	51.5748	44.964	48.2301	45.5497		99.5859	119.433	122.699	114.261	123.035	113.501	114.261	111.94		113.812	188.579	179.33	219.281	238.556	252.426	236.907	245.754			15.444	102.99	2.71452	9	156.004	5.4626	10	191.206	11.6612	11	205.624	10.4709	10
	15.8117	93.3824	76.6667	63.5965	47.8927	55.5118	46.0432	56.6372	62.8272		97.3085	118.623	133.129	111.684	118.464	113.815	126.408	114.925		104.204	154.726	209.334	233.196	213.404	247.191	223.19	182.923			15.8117	100.68	1.88464	9	152.682	7.3102	10	182.889	13.2903	11	200.943	6.44749	10
	16.1794	95.2206	85.4167	68.8596	68.1992	54.7244	51.7986	54.4248	63.8743		97.3085	122.065	127.403	123.024	125.777	107.064	117.43	113.267		102.193	142.905	185.018	180.389	229.837	206.694	215.765	177.328			16.1794	109.679	3.71624	9	152.295	4.4124	10	179.328	7.61535	11	195.742	12.4199	10
	16.5472	89.7059	82.0833	67.9825	65.9004	55.5118	41.3669	56.6372	64.9215		92.7536	124.089	130.47	115.979	123.583	103.454	129.401	135.655		103.397	151.175	191.918	175.992	222.625	250.088	228.474	208.953			16.5472	103.758	1.91141	9	157.592	4.52162	10	185.743	9.88422	11	208.75	6.34497	10
	16.9149	111.765	65.4167	68.4211	49.4253	54.7244	45.6835	50	68.0628		95.0311	126.518	128.63	116.151	133.638	115.228	132.923	117.413		85.0278	193.404	187.997	235.004	244.202	252.231	265.845	172.507			16.9149	102.966	2.9561	9	156.631	6.62817	10	190.444	11.1722	11	214.754	10.7799	10
	17.2826	95.2206	87.9167	56.5789	61.6858	40.5512	46.0432	49.5575	60.2094		113.251	122.065	133.742	103.093	121.389	111.46	133.803	122.056		118.935	138.841	236.382	167.126	299.349	242.077	269.995	202.72			17.2826	105.668	3.65124	9	153.435	9.88411	10	197.108	15.4997	11	210.668	9.35262	10
	17.6503	99.2647	76.6667	77.193	72.4138	49.2126	44.6043	46.0177	64.3979		95.0311	119.636	125.767	108.419	116.088	101.413	129.049	114.096		95.735	156.046	162.925	149.722	235.89	227.361	280.434	177.174			17.6503	103.482	1.94939	9	151.82	3.11139	10	182.849	11.7793	11	209.62	11.5946	10
	18.018	108.088	67.5	78.9474	52.8736	59.8425	49.2806	50.4425	64.9215		99.793	117.004	123.517	107.904	129.982	117.268	125.352	118.242		92.3255	173.339	156.455	204.079	217.206	237.961	248.505	182.131			18.018	102.64	2.3889	9	145.274	4.25702	10	189.47	9.43969	11	202.199	11.3174	10
	18.3857	83.4559	85.8333	65.7895	57.4713	62.2047	38.1295	55.3097	61.7801		108.903	120.445	131.697	111.512	124.68	119.152	138.732	119.237		130.491	140.325	200.18	194.031	200.435	312.494	250.828	193.003			18.3857	109.5	3.49422	9	159.189	6.20706	10	189.361	13.9355	11	208.502	5.69198	10
	18.7534	84.1912	72.0833	75.8772	52.4904	46.063	40.6475	50.885	62.3037		97.5155	108.704	123.108	112.371	126.874	109.105	127.289	115.257		115.826	150.804	162.247	214.079	275.436	268.418	250.15	184.992			18.7534	99.9036	3.5666	9	155.814	2.45037	10	197.786	12.4641	11	208.264	8.79225	10
	19.1211	104.779	62.9167	77.193	57.0881	50.7874	55.036	49.5575	57.0681		98.5507	122.065	138.037	126.804	121.389	105.338	126.937	119.071		94.0554	194.01	178.82	222.12	239.015	191.398	256.14	208.648			19.1211	101.884	2.45917	9	158.666	5.81658	10	185.265	9.27914	11	208.137	10.3339	10
	19.4888	102.206	63.75	89.0351	48.659	61.0236	41.0072	50.885	60.2094		103.106	112.955	123.517	120.103	115.356	114.757	127.113	129.851		100.88	177.185	138.729	246.826	189.036	279.845	249.804	215.665			19.4888	106.269	1.71986	9	150.712	4.76987	10	189.515	12.5714	11	220.949	9.54821	10
	19.8566	94.1176	67.9167	76.7544	65.9004	59.4488	44.2446	59.292	61.7801		94.2029	118.623	121.268	110.997	123.035	113.658	144.894	122.056		100.091	174.66	157.995	168.431	206.959	256.885	244.374	197.566			19.8566	107.002	3.31444	9	153.151	4.3387	10	187.877	9.37696	11	218.319	8.58835	10
	20.2243	97.7941	78.3333	66.6667	53.2567	49.2126	46.4029	65.4867	39.7906		87.9917	122.065	141.922	113.918	127.239	120.408	120.07	134.992		89.9765	155.827	212.883	213.903	258.551	259.484	183.351	339.255			20.2243	101.061	2.70344	9	152.869	7.4238	10	194.669	12.9053	11	224.747	14.6271	10
	20.592	100.368	72.0833	77.6316	58.2375	54.3307	53.2374	51.3274	63.8743		104.141	121.66	121.063	107.045	127.971	118.367	131.338	129.187		103.759	168.777	155.946	183.807	235.54	222.339	255.883	202.252			20.592	102.406	1.70426	9	157.877	5.15065	10	191.889	9.97626	11	212.485	10.4261	10
	20.9597	94.8529	77.9167	70.614	65.1341	59.8425	38.1295	51.3274	44.5026		110.352	121.862	132.924	120.103	121.755	122.763	123.063	126.7		116.34	156.401	188.241	184.394	203.459	321.963	239.761	284.702			20.9597	107.496	2.36492	9	154.369	6.0396	10	193.711	14.3496	11	226.375	11.8198	10
	21.3274	100.368	74.5833	58.7719	63.9847	58.2677	41.0072	57.5221	52.356		95.2381	124.899	134.969	123.54	127.605	108.163	130.458	129.353		94.8892	167.462	229.649	193.077	218.998	263.767	226.796	247.065			21.3274	105.491	2.60273	9	160.023	9.07521	10	187.524	12.7814	11	223.207	7.03443	10
	21.6951	88.9706	72.5	71.9298	57.8544	51.5748	43.5252	47.7876	52.356		95.8592	128.138	126.38	117.01	123.766	116.797	113.204	132.172		107.743	176.742	175.7	202.25	239.974	268.345	236.89	252.449			21.6951	106.033	3.09163	9	160.755	4.56142	10	201.82	10.5404	11	217.908	10.138	10
	22.0629	78.3088	79.5833	60.5263	46.7433	35.4331	42.446	56.1947	65.9686		93.1677	126.518	115.746	114.777	131.444	111.46	129.577	124.71		118.975	158.976	191.233	245.547	370.965	262.592	230.587	189.044			22.0629	105.746	2.92987	9	158.866	4.75826	10	212.507	19.8222	11	220.686	11.0167	10
	22.4306	91.1765	85	78.5088	62.4521	68.5039	43.1655	57.5221	47.1204		108.075	123.279	128.221	114.777	128.885	108.163	128.521	124.544		118.533	145.035	163.32	183.783	188.142	250.578	223.429	264.31			22.4306	108.333	2.11155	9	154.915	3.78301	10	192.974	11.6186	11	232.237	8.3792	10
	22.7983	97.4265	66.6667	60.9649	49.4253	56.6929	37.0504	61.5044	57.0681		95.8592	118.016	131.288	117.01	129.25	104.239	139.789	128.027		98.3913	177.024	215.351	236.742	227.983	281.343	227.282	224.34			22.7983	103.38	2.20374	9	158.339	7.66292	10	203.163	11.4408	11	215.238	12.1846	10
	23.166	89.7059	69.5833	77.6316	60.1533	56.2992	41.0072	46.4602	43.4555		91.9255	125.506	128.63	123.711	120.658	114.914	131.162	128.358		102.474	180.368	165.693	205.66	214.316	280.228	282.311	295.379			23.166	103.358	2.62891	9	157.202	3.48242	10	198.764	11.4691	11	230.95	12.0776	10
	23.5337	92.6471	77.0833	64.4737	61.6858	49.2126	42.8058	47.7876	49.7382		95.8592	121.053	135.583	114.605	126.325	123.077	122.887	122.554		103.467	157.041	210.292	185.788	256.693	287.524	257.153	246.398			23.5337	104.957	2.54501	9	159.009	7.30327	10	201.193	12.3785	11	224.032	9.27083	10
	23.9014	93.3824	69.5833	71.9298	59.0038	50	44.964	57.9646	66.4921		101.035	121.255	135.174	110.825	132.176	111.774	126.056	130.348		108.195	174.259	187.925	187.826	264.351	248.585	217.471	196.036			23.9014	102.732	2.70302	9	158.11	6.77895	10	191.671	13.2492	11	227.542	7.47577	10
	24.2691	90.4412	81.25	63.1579	56.705	41.7323	35.6115	48.2301	52.8796		101.035	120.85	118.609	116.667	126.325	113.815	125	120.066		111.714	148.739	187.798	205.743	302.704	319.601	259.174	227.056			24.2691	105.812	3.06327	9	163.578	8.43036	10	211.354	15.8608	11	238.732	8.49649	10
	24.6368	96.3235	73.3333	55.7018	60.9195	39.3701	50	52.2124	65.9686		101.449	125.304	122.086	130.756	117.733	115.228	124.824	113.93		105.321	170.869	219.178	214.637	299.042	230.455	239.07	172.704			24.6368	105.135	1.94463	9	161.9	7.36425	10	207.932	12.4197	11	221.896	10.079	10
	25.0045	91.5441	71.25	71.4912	54.023	48.4252	41.0072	47.7876	47.1204		96.4803	128.745	137.832	121.478	121.207	111.774	127.817	121.725		105.392	180.695	192.796	224.863	250.297	272.572	267.469	258.327			25.0045	102.801	1.70274	9	162.577	5.35058	10	201.449	10.8487	11	240.63	9.14565	10
	25.3722	91.1765	89.5833	70.614	62.8352	47.2441	59.7122	46.4602	56.0209		97.3085	122.267	133.947	123.883	135.466	118.681	134.507	123.549		106.725	136.484	189.689	197.156	286.737	198.755	289.51	220.541			25.3723	105.527	2.68928	9	157.753	6.58559	10	196.096	12.2141	11	236.862	9.04074	10
	25.74	91.1765	71.6667	76.3158	61.6858	60.6299	46.0432	50.4425	51.3089		95.0311	122.065	131.288	109.107	129.616	112.245	142.254	116.75		104.228	170.323	172.033	176.875	213.782	243.782	282.011	227.543			25.74	102.955	3.9389	9	166.999	4.92276	10	195.338	9.89288	11	226.995	10.6409	10
	26.1077	102.574	82.5	76.7544	44.4444	58.6614	42.446	39.3805	60.2094		90.4762	109.312	123.517	110.137	131.627	113.03	140.669	123.881		88.2062	132.499	160.926	247.809	224.384	266.291	357.204	205.75			26.1077	102.52	3.05604	9	154.101	3.6135	10	210.015	10.9598	11	236.887	16.2707	10
	26.4754	97.4265	72.0833	72.807	52.1073	38.5827	45.3237	53.5398	63.3508		93.9959	126.316	131.288	118.729	117.185	99.529	134.155	118.905		96.4788	175.236	180.324	227.854	303.723	219.596	250.57	187.694			26.4754	107.996	3.24184	9	162.753	4.3416	10	208.751	12.0953	11	231.549	10.5278	10
	26.8431	85.6618	63.3333	76.3158	51.341	56.6929	42.0863	50.4425	52.8796		111.387	114.575	124.335	110.481	130.713	123.234	132.746	131.675		130.031	180.908	162.922	215.191	230.563	292.812	263.164	249.009			26.8431	112.233	3.3764	9	155.216	6.42292	10	212.948	13.1801	11	236.661	11.046	10
	27.2108	87.8676	77.5	84.6491	58.2375	61.4173	35.9712	51.7699	51.3089		91.3043	118.421	136.81	126.804	138.94	110.832	119.542	117.745		103.911	152.801	161.62	217.736	226.222	308.113	230.911	229.482			27.2108	104.996	2.19536	9	159.52	5.52932	10	204.695	14.042	11	246.006	8.94994	10
	27.5785	99.6324	72.9167	66.2281	70.8812	57.0866	36.3309	42.9204	53.9267		99.793	118.623	127.607	109.107	127.057	113.187	132.394	128.027		100.161	162.684	192.679	153.929	222.568	311.544	308.465	237.408			27.5785	105.004	3.29488	9	163.725	6.36393	10	199.926	14.7982	11	243.176	12.8237	10
	27.9463	101.471	61.6667	85.5263	57.0881	61.4173	40.2878	36.7257	50.2618		90.0621	128.745	127.198	119.588	123.4	119.309	118.662	122.222		88.7569	208.776	148.724	209.479	200.921	296.143	323.104	243.171			27.9463	108.039	3.25295	9	164.66	6.09311	10	210.847	10.5602	11	247.641	15.7087	10
	28.314	95.5882	72.5	56.5789	68.5824	53.937	48.9209	55.7522	61.2565		94.4099	134.413	124.54	111.512	118.83	126.06	140.317	118.408		98.7673	185.397	220.117	162.596	220.313	257.681	251.68	193.298			28.314	109.342	3.95609	9	172.338	7.55378	10	199.439	10.5858	11	228.193	10.1651	10
	28.6817	105.147	70	67.1053	57.8544	56.2992	39.2086	56.6372	54.4503		100.207	124.089	138.446	109.45	131.81	109.576	124.824	131.177		95.3018	177.27	206.311	189.182	234.124	279.469	220.392	240.912			28.6817	104.351	2.179	9	170.27	7.2758	10	205.293	10.6545	11	231.815	7.99773	10
	29.0494	108.456	75.4167	75.8772	50.5747	45.2756	48.5612	68.5841	59.1623		96.8944	126.721	117.178	108.247	118.464	117.739	138.556	136.153		89.3399	168.027	154.431	214.035	261.652	242.456	202.024	230.134			29.0494	104.937	4.25659	9	162.713	3.62096	10	208.3	11.3826	11	235.085	10.883	10
	29.4171	115.809	71.25	56.5789	46.3602	35.4331	43.8849	46.9027	65.9686		94.2029	112.348	124.54	116.838	120.293	114.914	135.211	119.071		81.3435	157.682	220.117	252.024	339.492	261.852	288.281	180.497			29.4171	99.8274	4.52657	9	168.929	7.62974	10	217.384	16.739	11	235.259	11.3838	10
	29.7849	92.2794	79.5833	59.2105	59.387	48.8189	52.1583	53.0973	48.6911		95.8592	126.721	143.763	116.838	122.669	116.484	130.634	115.755		103.879	159.23	242.799	196.741	251.274	223.327	246.027	237.732			29.7848	110.669	2.7341	9	165.935	10.509	10	207.104	8.42611	11	243.46	8.58736	10
	30.1526	79.7794	75	75	42.9119	51.5748	44.6043	43.3628	50.2618		97.1014	127.126	126.789	127.32	123.766	106.75	132.042	109.121		121.712	169.501	169.052	296.7	239.974	239.327	304.506	217.105			30.1526	108.672	3.48968	9	166.236	6.49873	10	205.21	12.8597	11	232.996	11.6968	10
	30.5203	91.9118	77.9167	67.9825	51.341	57.874	39.2086	39.3805	63.3508		90.2692	116.599	126.994	118.213	133.272	110.832	135.915	121.061		98.2128	149.646	186.804	230.251	230.28	282.673	345.134	191.097			30.5203	107.609	3.81288	9	164.161	5.62063	10	203.496	11.0992	11	244.545	15.5969	10
	30.888	76.1029	86.25	73.2456	61.6858	47.2441	37.0504	46.4602	72.7749		89.441	128.947	126.38	124.742	123.949	120.094	113.732	126.534		117.526	149.504	172.543	202.222	262.358	324.138	244.795	173.87			30.888	106.617	2.66569	9	162.614	4.02648	10	217.056	14.901	11	231.344	10.0345	10
	31.2558	88.9706	70	73.2456	64.3678	61.0236	34.8921	52.6549	60.733		100	122.267	130.47	121.993	126.874	112.716	126.585	124.378		112.397	174.667	178.127	189.525	207.909	323.041	240.404	204.795			31.2557	113.925	3.33368	9	165.483	4.38479	10	213.603	12.6963	11	242.465	10.3361	10
	31.6235	91.5441	65	65.7895	45.5939	52.7559	42.0863	47.3451	59.6859		98.9648	123.077	133.538	121.649	117.55	132.967	134.507	125.871		108.106	189.349	202.978	266.811	222.819	315.939	284.099	210.889			31.6235	106.517	1.78173	9	173.054	6.90259	10	213.369	14.5673	11	239.718	11.8493	10
	31.9912	91.1765	74.5833	63.1579	47.5096	49.6063	36.6906	39.3805	57.0681		92.5466	113.563	136.401	116.323	123.035	124.647	130.282	123.383		101.503	152.263	215.968	244.841	248.022	339.724	330.828	216.203			31.9912	104.618	1.48634	9	163.28	8.26051	10	220.765	16.4184	11	243.642	11.5211	10
	32.3589	100.735	66.6667	67.1053	50.5747	55.9055	46.0432	55.3097	54.9738		92.5466	130.972	130.47	107.388	130.53	126.531	132.57	120.232		91.8711	196.457	194.426	212.336	233.484	274.809	239.687	218.708			32.3589	106.606	2.64874	9	173.222	6.65564	10	213.225	10.9262	11	234.131	7.93985	10
	32.7266	94.4853	68.3333	69.7368	52.8736	46.063	45.6835	53.5398	58.1152		98.3437	125.911	129.039	117.182	128.154	118.995	138.028	126.202		104.084	184.26	185.037	221.627	278.214	260.478	257.805	217.159			32.7266	108.386	3.27221	9	168.187	3.86278	10	212.812	12.8605	11	241.57	9.15121	10
	33.0943	93.75	66.25	84.2105	43.6782	48.4252	47.1223	42.0354	64.3979		97.7226	129.555	123.722	122.68	125.777	109.105	141.725	122.886		104.237	195.554	146.92	280.874	259.735	231.536	337.157	190.822			33.0943	110.496	2.20932	9	176.212	6.87186	10	217.156	11.9469	11	248.235	11.9751	10
	33.462	102.574	90	63.5965	49.4253	38.5827	47.1223	48.6726	72.2513		94.824	121.255	129.448	113.402	121.755	117.268	129.754	141.791		92.4449	134.728	203.546	229.441	315.569	248.86	266.585	196.247			33.462	105.012	3.02545	9	173.886	7.67904	10	215.545	13.3632	11	236.837	11.406	10
	33.8297	92.2794	77.0833	59.6491	52.4904	48.0315	54.3165	51.3274	52.356		86.7495	122.47	120.041	119.588	133.09	109.419	135.739	123.715		94.0074	158.88	201.245	227.828	277.088	201.447	264.458	236.295			33.8297	103.419	2.93801	9	173.381	7.34404	10	214.601	12.5939	11	249.506	8.59947	10
	34.1975	80.1471	68.3333	82.4561	44.4444	45.6693	38.8489	41.5929	54.4503		91.7184	129.352	133.947	116.667	135.649	110.675	139.085	124.544		114.438	189.296	162.446	262.5	297.025	284.886	334.395	228.73			34.1975	106.532	2.92342	9	170.866	5.79707	10	218.124	14.5745	11	251.788	11.6634	10
	34.5652	102.206	71.25	64.9123	52.8736	51.1811	36.6906	48.6726	71.2042		96.4803	119.028	143.967	115.636	126.508	110.518	129.225	118.408		94.398	167.057	221.787	218.702	247.178	301.216	265.499	166.294			34.5652	105.963	3.46329	9	173.327	8.11749	10	217.601	12.8967	11	244.124	12.2285	10
	34.9329	82.3529	62.9167	68.8596	57.4713	49.2126	41.0072	57.9646	50.7853		93.3747	129.96	139.264	112.199	141.133	118.995	130.634	124.378		113.384	206.558	202.243	195.227	286.783	290.181	225.368	244.909			34.9329	109.979	2.48326	9	172.571	7.55609	10	216.051	13.6395	11	245.873	9.34518	10
	35.3006	83.8235	70.4167	75.8772	58.2375	49.2126	42.8058	64.1593	50.7853		101.656	125.911	134.151	108.935	126.143	109.419	118.838	133.831		121.274	178.808	176.801	187.052	256.322	255.618	185.223	263.523			35.3006	108.792	2.36299	9	172.056	5.78416	10	207.547	9.22001	11	240.751	13.3106	10
	35.6683	81.9853	70	65.7895	51.7241	46.8504	37.4101	54.8673	67.5393		93.7888	112.551	132.106	117.01	125.594	113.501	126.232	125.373		114.397	160.787	200.802	226.22	268.075	303.396	230.069	185.63			35.6683	110.687	2.64242	9	169.19	6.33737	10	221.315	14.3597	11	246.663	13.4358	10
	36.036	89.7059	66.6667	67.5439	53.6398	42.126	53.9568	38.4956	50.7853		94.824	123.684	140.9	125.601	118.83	113.815	135.211	131.509		105.705	185.526	208.605	234.157	282.082	210.937	351.238	258.951			36.036	107.383	2.08058	9	178.289	8.87006	10	214.132	12.0464	11	252.104	13.8612	10
	36.4037	108.456	71.6667	66.6667	55.5556	53.5433	33.4532	61.5044	46.0733		100.828	125.304	128.221	109.794	123.583	102.669	128.521	113.267		92.967	174.842	192.331	197.629	230.81	306.902	208.962	245.841			36.4037	108.198	2.97913	9	169.356	5.91452	10	219.151	13.476	11	250.399	10.3591	10
	36.7714	98.5294	70	65.7895	49.8084	43.7008	40.6475	50.885	42.4084		92.9607	122.47	125.562	114.261	123.218	125.118	144.894	121.393		94.3481	174.957	190.855	229.401	281.957	307.812	284.749	286.248			36.7714	105.884	2.50918	9	172.28	6.36562	10	228.299	16.1429	11	260.35	13.9292	10
	37.1392	89.3382	79.1667	64.4737	59.0038	54.7244	42.8058	54.4248	49.7382		92.3395	121.66	131.493	110.825	129.982	113.187	146.127	127.032		103.359	153.676	203.948	187.826	237.521	264.42	268.493	255.4			37.1392	110.595	2.24244	9	174.367	5.44635	10	211.48	11.3429	11	266.268	12.4319	10
	37.5069	95.9559	65	77.6316	59.0038	38.9764	37.4101	48.6726	61.2565		98.5507	119.028	132.311	121.478	126.691	121.35	139.613	131.675		102.704	183.121	170.434	205.881	325.046	324.378	286.841	214.957			37.5069	108.183	3.07819	9	175.274	4.72232	10	228.966	16.8348	11	248.618	12.7626	10
	37.8746	81.25	72.5	57.8947	58.2375	51.9685	52.1583	51.3274	47.1204		92.5466	134.818	142.331	124.055	137.477	118.995	129.577	127.695		113.903	185.956	245.845	213.015	264.539	228.143	252.453	270.997			37.8746	108.941	4.19562	9	178.799	9.02133	10	213.68	8.28657	11	256.124	7.49266	10
	38.2423	113.235	69.5833	73.2456	54.023	33.4646	43.5252	43.8053	51.8325		94.4099	125.911	127.198	106.701	129.433	115.071	144.718	123.217		83.375	180.95	173.66	197.51	386.777	264.377	330.367	237.722			38.2423	105.821	3.16946	9	173.389	5.5737	10	230.225	20.7958	11	267.075	13.4221	10
	38.61	93.0147	69.1667	68.8596	57.4713	51.5748	42.8058	66.3717	62.3037		100	109.919	142.74	124.742	121.755	110.204	131.866	127.032		107.51	158.919	207.292	217.052	236.075	257.452	198.678	203.891			38.61	106.84	3.03877	9	175.54	6.45757	10	213.399	8.33199	11	251.467	13.2756	10
	38.9777	84.1912	71.6667	77.193	52.4904	46.4567	41.3669	48.2301	56.0209		93.5818	115.587	133.333	117.182	123.4	114.286	136.092	122.056		111.154	161.284	172.727	223.245	265.625	276.273	282.171	217.876			38.9777	109.628	1.98087	9	167.202	5.11936	10	221.293	12.8005	11	256.608	11.6497	10
	39.3454	88.2353	65	75.8772	66.2835	42.9134	39.2086	43.8053	59.1623		89.234	112.348	126.585	113.918	132.907	117.268	133.979	119.735		101.132	172.843	166.829	171.864	309.709	299.088	305.851	202.383			39.3454	109.305	2.64593	9	175.097	4.93846	10	220.97	14.3865	11	262.978	21.7159	10
	39.7132	86.0294	65.8333	74.1228	44.8276	42.126	39.5683	61.0619	49.7382		95.4451	122.874	125.562	120.447	125.96	122.292	125.704	119.9		110.945	186.645	169.398	268.689	299.007	309.065	205.863	241.063			39.7132	108.976	2.09999	9	168.937	5.46887	10	237.041	14.0001	11	247.221	10.7265	10
	40.0809	96.6912	74.1667	78.0702	52.8736	42.5197	55.3957	57.9646	54.9738		97.5155	130.972	143.149	108.935	128.336	108.006	143.838	125.871		100.853	176.591	183.36	206.029	301.828	194.972	248.148	228.965			40.0809	106.149	2.76873	9	168.106	5.89466	10	215.268	12.8818	11	260.909	8.47644	10
	40.4486	90.4412	80	68.8596	51.7241	46.8504	42.0863	50	54.4503		90.6832	135.425	115.951	107.56	126.691	122.135	137.5	131.012		100.268	169.281	168.387	207.95	270.416	290.201	275	240.608			40.4486	105.066	3.49945	9	171.758	4.68884	10	220.882	12.2772	11	264.19	11.766	10
	40.8164	79.4118	72.0833	51.3158	56.705	44.8819	35.6115	40.2655	53.4031		89.441	123.482	136.196	115.979	138.208	111.303	128.345	126.534		112.629	171.304	265.408	204.531	307.938	312.548	318.747	236.941			40.8164	107.336	3.60176	9	183.188	10.8331	10	231.182	15.4589	11	265.08	14.9983	10
	41.184	101.103	64.5833	58.3333	59.7701	56.2992	38.8489	41.1504	53.4031		96.4803	118.623	116.973	123.54	130.347	116.013	138.732	119.071		95.4278	183.675	200.526	206.691	231.526	298.625	337.135	222.967			41.184	103.832	2.27091	9	187.532	6.55237	10	224.274	11.7058	11	272.053	13.4097	10
	41.5517	83.0882	72.0833	76.7544	48.659	59.8425	47.8417	53.5398	57.5916		101.035	121.053	141.718	122.68	144.607	120.879	132.923	123.217		121.6	167.934	184.638	252.123	241.646	252.665	248.269	213.95			41.5517	111.285	3.30799	9	183.486	6.26216	10	223.578	7.75738	11	257.471	9.91176	10
	41.9194	85.2941	62.5	54.8246	55.1724	50.7874	48.5612	48.6726	40.8377		94.617	123.684	145.399	128.007	130.53	110.989	121.479	130.348		110.93	197.895	265.207	232.012	257.013	228.555	249.584	319.186			41.9194	107.979	1.99107	9	192.984	9.52683	10	217.756	10.9051	11	280.915	13.3252	10
	42.2871	93.3824	74.5833	67.1053	52.1073	53.937	39.9281	47.3451	55.4974		89.0269	134.615	134.151	123.883	125.046	110.989	134.859	123.715		95.3359	180.49	199.912	237.746	231.837	277.972	284.843	222.92			42.2871	107.253	2.57572	9	176.566	6.74105	10	217.942	11.0329	11	267.412	15.0687	10
	42.6548	95.2206	73.75	67.5439	51.7241	50	39.5683	43.8053	58.6387		92.5466	132.794	137.628	120.79	117.55	121.978	130.282	127.529		97.1918	180.059	203.761	233.528	235.101	308.272	297.411	217.483			42.6548	111.985	3.73952	9	178.293	5.1279	10	230.414	10.7527	11	262.294	10.9852	10
	43.0225	71.3235	61.6667	76.3158	50.5747	48.8189	46.7626	45.5752	49.7382		90.6832	122.065	128.63	115.636	122.303	115.228	131.866	126.534		127.143	197.943	168.549	228.643	250.525	246.41	289.337	254.4			43.0225	112.462	3.71803	9	179.786	7.02381	10	227.759	14.0087	11	268.446	11.7247	10
	43.3902	90.0735	60.8333	54.386	46.3602	57.874	40.2878	38.0531	64.9215		88.8199	121.053	135.174	108.763	125.229	120.722	125	133.333		98.6082	198.991	248.545	234.604	216.381	299.65	328.488	205.376			43.3902	109.949	2.98066	9	185.169	8.41919	10	230.767	11.6488	11	261.492	12.542	10
	43.7579	91.9118	69.5833	69.7368	55.9387	41.3386	39.2086	44.2478	47.644		89.0269	128.745	133.538	117.869	124.497	116.641	139.613	122.388		96.8613	185.023	191.488	210.712	301.165	297.487	315.525	256.88			43.7579	112.649	4.13822	9	183.024	5.36624	10	249.154	16.8006	11	268.556	11.5858	10
	46.0256	145.956	109.583	105.263	98.4674	88.189	84.1727	110.619	122.513		190.476	243.117	234.969	221.478	225.411	197.645	220.246	181.592		130.503	221.856	223.221	224.925	255.6	234.809	199.103	148.223			46.0256	130.189	8.06486	9	281.834	27.2547	10	296.493	28.3997	11	303.694	44.1067	10
	46.3934	140.074	102.5	117.982	76.2452	103.937	95.6835	113.274	142.408		197.308	265.789	259.918	208.076	231.993	183.987	204.93	190.879		140.861	259.307	220.302	272.903	223.205	192.288	180.914	134.036			46.3934	120.586	8.17789	9	286.21	25.6749	10	297.598	31.7478	11	277.223	33.2469	10
	46.7611	138.235	120	107.456	91.1877	93.7008	96.4029	98.2301	130.366		178.261	264.777	240.491	214.433	223.949	207.064	208.451	191.874		128.955	220.648	223.804	235.156	239.004	214.791	212.207	147.18			46.7611	128.771	5.78925	9	269.772	22.6332	10	291.952	33.3343	11	279.094	34.3959	10
	47.1288	143.75	98.75	116.667	88.1226	93.3071	96.4029	94.2478	131.414		187.371	256.275	256.646	198.625	231.079	196.546	228.521	209.619		130.345	259.519	219.982	225.397	247.654	203.88	242.468	159.511			47.1288	132.056	10.336	9	280.316	25.1524	10	295.442	29.1763	11	316.983	40.9028	10
	47.4966	131.985	97.0833	100.439	87.7395	91.7323	84.8921	115.044	124.084		180.538	249.595	235.583	204.296	209.872	197.331	211.972	189.055		136.787	257.094	234.554	232.843	228.788	232.45	184.252	152.361			47.4966	121.21	6.67787	9	274.796	21.1931	10	308.192	43.2558	11	291.611	39.8023	10
	47.8643	158.824	108.75	116.667	90.4215	75.5906	91.0072	109.735	140.838		179.089	253.239	246.421	205.67	217.367	180.848	191.901	194.859		112.76	232.863	211.218	227.457	287.559	198.718	174.878	138.357			47.8643	114.282	5.18997	9	282.57	28.7885	10	284.901	26.4112	11	274.001	36.4895	10
RAW DATA
		Calcium (uM)
		0	50	50	150	150	150	500	500		0	50	50	150	150	150	500	500
		283	383	335	330	311	324	320	322		613	528	497	584	566	593	560	476
		361	282	329	305	331	346	325	321		564	601	515	574	506	561	561	548
		319	334	351	334	296	339	342	299		612	570	557	548	526	558	477	575
		340	288	276	314	300	288	320	318		509	537	577	544	595	565	612	512
		352	392	330	292	314	311	318	285		548	529	529	569	561	540	549	520
		324	271	282	331	301	302	291	298		465	513	541	524	486	526	553	565
		327	281	279	318	294	288	295	291		560	555	532	536	520	538	499	502
		316	315	284	286	284	324	316	274		551	540	523	424	508	512	524	477
		287	290	333	298	274	276	273	283		536	484	510	489	512	576	542	498
		305	292	283	314	276	253	259	282		495	497	560	526	467	533	555	461
		329	267	284	246	244	281	273	272		555	510	490	509	463	465	480	501
		297	297	319	279	294	313	267	292		550	464	509	541	465	498	520	474
		257	272	277	285	328	300	303	265		520	524	487	512	513	483	504	449
		277	294	276	294	273	287	313	256		501	541	498	511	453	465	513	455
		286	332	258	333	295	231	285	245		547	509	488	483	553	492	511	446
		280	304	291	283	266	343	272	273		461	524	501	419	453	480	495	489
		248	309	287	290	255	281	319	282		508	458	493	472	480	439	548	466
		264	276	268	301	272	269	290	258		506	483	462	509	450	507	464	410
		288	245	238	271	279	248	280	259		534	510	508	452	481	482	478	422
		273	243	245	320	281	353	256	265		525	530	500	525	480	514	493	491
		300	250	253	277	293	292	280	306		532	511	469	508	486	522	547	475
		298	306	273	265	242	316	311	266		483	439	485	450	526	508	502	440
		292	328	273	313	266	276	277	264		473	480	474	517	464	534	533	491
		314	271	259	307	300	278	283	252		486	495	482	483	520	522	547	513
		285	271	285	286	260	264	267	238		488	492	471	484	498	532	391	540
		271	274	276	253	251	268	259	279		443	496	482	550	471	501	502	451
		300	285	257	308	275	290	252	253		468	495	449	471	461	550	488	464
		272	240	228	261	254	278	226	191		483	494	489	582	547	637	568	603
		302	243	205	205	216	214	213	170		483	578	563	580	590	569	665	610
		293	215	262	189	158	197	172	168		539	520	460	609	591	607	646	665
		310	221	184	239	155	176	172	148		474	575	517	560	630	610	632	667
		272	206	255	198	195	167	171	147		457	503	563	600	573	641	645	619
		238	199	194	217	216	167	179	152		428	571	573	644	618	717	671	682
		275	204	194	190	206	178	180	170		541	608	496	615	626	628	601	609
		251	216	211	225	175	187	184	142		504	543	588	642	625	700	671	691
		266	200	188	190	170	189	166	151		491	529	542	568	634	663	680	703
		278	223	206	168	190	172	160	157		464	561	587	585	610	672	642	652
		271	189	216	197	179	155	152	136		485	552	611	658	595	666	660	745
		257	204	182	193	176	161	156	138		491	613	551	607	623	671	708	647
		246	224	214	184	171	158	147	106		493	564	605	624	620	621	721	753
		241	228	174	179	189	144	165	128		509	609	631	637	652	694	680	657
		252	194	207	199	181	137	154	128		452	563	530	651	611	750	669	732
		273	166	199	160	157	145	143	107		452	586	582	608	653	632	672	721
		267	176	176	182	156	169	126	137		439	533	604	628	643	597	693	785
		256	208	165	200	157	151	140	108		465	565	556	642	583	614	764	695
		214	202	170	195	152	137	142	114		466	554	657	616	689	678	644	725
		276	215	182	177	147	173	146	129		525	608	548	693	642	607	700	754
		248	216	212	179	146	128	134	150		491	589	634	692	618	679	790	785
		289	186	162	181	144	155	114	138		445	536	608	668	633	670	728	716
		268	237	202	184	174	108	173	149		463	550	600	609	638	681	711	782
		231	200	212	158	133	157	108	99		467	587	611	630	628	724	666	724
		283	187	188	208	125	175	102	133		497	579	552	654	668	685	680	733
		248	201	181	127	142	144	125	114		491	534	607	661	587	712	785	752
		263	202	160	136	107	121	143	104		539	587	603	671	656	686	736	705
		261	205	186	135	159	145	132	105		498	593	602	603	603	705	722	727
		238	204	183	188	125	107	148	94		441	574	545	686	623	703	673	749
		315	187	176	174	169	137	143	105		463	532	611	642	634	646	712	716
		253	177	148	134	136	131	124	110		500	582	584	600	651	700	736	706
		307	186	199	160	147	156	150	119		451	636	652	698	664	720	722	806
		210	195	169	175	147	103	133	112		493	613	625	623	651	641	721	756
		250	206	186	161	173	144	121	143		467	551	529	598	642	647	698	743
		309	193	149	149	168	101	121	100		473	584	574	600	699	749	722	765
		273	230	189	165	132	126	133	129		511	623	614	680	644	693	704	712
		240	181	151	127	132	120	127	101		465	579	609	626	622	628	653	730
		256	202	170	146	144	148	129	97		438	623	615	648	696	692	737	726
		249	190	185	155	143	128	131	100		477	601	598	589	627	717	751	727
		239	202	156	146	142	122	132	121		519	607	650	650	663	676	703	766
		257	187	169	163	139	142	114	91		469	593	643	654	698	719	717	707
		279	145	156	194	126	150	104	89		498	664	619	697	695	647	694	756
		238	152	156	136	131	125	109	87		481	590	600	665	673	723	649	675
		254	184	145	125	141	128	128	120		470	586	651	650	648	725	718	693
		259	205	157	178	139	144	123	122		470	603	623	716	688	682	667	683
		244	197	155	172	141	115	128	124		448	613	638	675	676	659	735	818
		304	157	156	129	139	127	113	130		459	625	629	676	731	734	755	708
		259	211	129	161	103	128	112	115		547	603	654	600	664	710	760	736
		270	184	176	189	125	124	104	123		459	591	615	631	635	646	733	688
		294	162	180	138	152	137	114	124		482	578	604	628	711	747	712	713
		227	206	150	150	158	106	125	118		526	595	644	649	682	759	788	719
		229	173	173	137	117	113	115	119		471	537	602	654	694	695	723	695
		285	151	176	149	129	153	112	109		476	603	675	738	664	671	721	718
		278	153	203	127	155	114	115	115		498	558	604	699	631	731	722	783
		256	163	175	172	151	123	134	118		455	586	593	646	673	724	823	736
		266	188	152	139	125	129	148	76		425	603	694	663	696	767	682	814
		273	173	177	152	138	148	116	122		503	601	592	623	700	754	746	779
		258	187	161	170	152	106	116	85		533	602	650	699	666	782	699	764
		273	179	134	167	148	114	130	100		460	617	660	719	698	689	741	780
		242	174	164	151	131	121	108	100		463	633	618	681	677	744	643	797
		213	191	138	122	90	118	127	126		450	625	566	668	719	710	736	752
		248	204	179	163	174	120	130	90		522	609	627	668	705	689	730	751
		265	160	139	129	144	103	139	109		463	583	642	681	707	664	794	772
		244	167	177	157	143	114	105	83		444	620	629	720	660	732	745	774
		252	185	147	161	125	119	108	95		463	598	663	667	691	784	698	739
		254	167	164	154	127	125	131	127		488	599	661	645	723	712	716	786
		246	195	144	148	106	99	109	101		488	597	580	679	691	725	710	724
		262	176	127	159	100	139	118	126		490	619	597	761	644	734	709	687
		249	171	163	141	123	114	108	90		466	636	674	707	663	712	726	734
		248	215	161	164	120	166	105	107		470	604	655	721	741	756	764	745
		248	172	174	161	154	128	114	98		459	603	642	635	709	715	808	704
		279	198	175	116	149	118	89	115		437	540	604	641	720	720	799	747
		265	173	166	136	98	126	121	121		454	624	642	691	641	634	762	717
		233	152	174	134	144	117	114	101		538	566	608	643	715	785	754	794
		239	186	193	152	156	100	117	98		441	585	669	738	760	706	679	710
		271	175	151	185	145	101	97	103		482	586	624	635	695	721	752	772
		276	148	195	149	156	112	83	96		435	636	622	696	675	760	674	737
		260	174	129	179	137	136	126	117		456	664	609	649	650	803	797	714
		286	168	153	151	143	109	128	104		484	613	677	637	721	698	709	791
		295	181	173	132	115	135	155	113		468	626	573	630	648	750	787	821
		315	171	129	121	90	122	106	126		455	555	609	680	658	732	768	718
		251	191	135	155	124	145	120	93		463	626	703	680	671	742	742	698
		217	180	171	112	131	124	98	96		469	628	620	741	677	680	750	658
		250	187	155	134	147	109	89	121		436	576	621	688	729	706	772	730
		207	207	167	161	120	103	105	139		432	637	618	726	678	765	646	763
		242	168	167	168	155	97	119	116		483	604	638	710	694	718	719	750
		249	156	150	119	134	117	107	114		478	608	653	708	643	847	764	759
		248	179	144	124	126	102	89	109		447	561	667	677	673	794	740	744
		274	160	153	132	142	128	125	105		447	647	638	625	714	806	753	725
		257	164	159	138	117	127	121	111		475	622	631	682	701	758	784	761
		255	159	192	114	123	131	95	123		472	640	605	714	688	695	805	741
		279	216	145	129	98	131	110	138		458	599	633	660	666	747	737	855
		251	185	136	137	122	151	116	100		419	605	587	696	728	697	771	746
		218	164	188	116	116	108	94	104		443	639	655	679	742	705	790	751
		278	171	148	138	130	102	110	136		466	588	704	673	692	704	734	714
		224	151	157	150	125	114	131	97		451	642	681	653	772	758	742	750
		228	169	173	152	125	119	145	97		491	622	656	634	690	697	675	807
		223	168	150	135	119	104	124	129		453	556	646	681	687	723	717	756
		244	160	154	140	107	150	87	97		458	611	689	731	650	725	768	793
		295	172	152	145	136	93	139	88		487	619	627	639	676	654	730	683
		268	168	150	130	111	113	115	81		449	605	614	665	674	797	823	732
		243	190	147	154	139	119	123	95		446	601	643	645	711	721	830	766
		261	156	177	154	99	104	110	117		476	588	647	707	693	773	793	794
		221	174	132	152	132	145	116	90		447	666	696	722	752	758	736	770
		308	167	167	141	85	121	99	99		456	622	622	621	708	733	822	743
		253	166	157	150	131	119	150	119		483	543	698	726	666	702	749	766
		229	172	176	137	118	115	109	107		452	571	652	682	675	728	773	736
		240	156	173	173	109	109	99	113		431	555	619	663	727	747	761	722
		234	158	169	117	107	110	138	95		461	607	614	701	689	779	714	723
		263	178	178	138	108	154	131	105		471	647	700	634	702	688	817	759
		246	192	157	135	119	117	113	104		438	669	567	626	693	778	781	790
		216	173	117	148	114	99	91	102		432	610	666	675	756	709	729	763
		275	155	133	156	143	108	93	102		466	586	572	719	713	739	788	718
		226	173	175	127	152	133	121	110		488	598	693	714	791	770	755	743
		232	150	125	144	129	135	110	78		457	611	711	745	714	707	690	786
		254	179	153	136	137	111	107	106		430	665	656	721	684	707	766	746
		259	177	154	135	127	110	99	112		447	656	673	703	643	777	740	769
		194	148	174	132	124	130	103	95		438	603	629	673	669	734	749	763
		245	146	124	121	147	112	86	124		429	598	661	633	685	769	710	804
		250	167	159	146	105	109	100	91		430	636	653	686	681	743	793	738
		397	263	240	257	224	234	250	234		920	1201	1149	1289	1233	1259	1251	1095
		381	246	269	199	264	266	256	272		953	1313	1271	1211	1269	1172	1164	1151
		376	288	245	238	238	268	222	249		861	1308	1176	1248	1225	1319	1184	1157
		391	237	266	230	237	268	213	251		905	1266	1255	1156	1264	1252	1298	1264
		359	233	229	229	233	236	260	237		872	1233	1152	1189	1148	1257	1204	1140
		432	261	266	236	192	253	248	269		865	1251	1205	1197	1189	1152	1090	1175
		Fura2 380 nm (unbound)																	Fura2 340 nm (bound)																	340/380
Normalized
		Calcium (uM)																	Calcium (uM)																	Calcium (uM)
		0	50	150	500	0	50	150	500	0	50	150	500	0	50	150	500		0	50	150	500	0	50	150	500	0	50	150	500	0	50	150	500		0	50	150	500	0	50	150	500	0	50	150	500	0	50
		136.152	154.573	158.872	194.758	123.816	191.697	162.755	182.879	133	137.568	131.259	144.323	139.143	135.685	176.417	143.106		137.85	128.248	112.621	114.933	132.385	130.234	114.186	120.986	129.89	122.689	126.744	130.698	128.238	121.498	117.418	124.3		101.248	82.9692	70.8876	59.0131	106.921	67.9377	70.1581	66.1561	97.6615	89.1846	96.5603	90.5593	92.1631	89.5441
		125.245	145.427	154.892	194.355	118.553	160.289	149.15	180.545	132.571	120.676	141.968	128.305	141.286	138.728	176.417	140.562		127.259	114.124	103.655	117.339	134.477	130.477	112.509	127.11	127.135	113.926	128.036	116.996	109.715	115.58	110.597	116.349		101.608	78.4749	66.9208	60.3736	113.432	81.4012	75.4335	70.4035	95.8992	94.4064	90.1865	91.186	77.6547	83.3142
		110.784	137.481	147.098	179.637	116.579	159.386	167.177	170.428	122.143	125.811	130.246	121.928	117.286	131.535	157.77	141.499		120.249	119.184	104.759	112.102	128.87	125.141	107.407	105.527	123.416	113.445	125.065	119.631	120.725	116.425	117.54	118.477		108.544	86.6913	71.217	62.4047	110.543	78.5146	64.2478	61.9185	101.042	90.1714	96.0218	98.1158	102.933	88.5125
		118.382	132.384	149.585	185.887	112.237	167.87	150.85	172.763	119	118.784	121.997	128.771	117.857	117.151	164.717	128.782		133.022	115.559	99.4483	107.643	118.828	121.342	104.892	105.153	109.917	109.484	111.628	104.743	121.891	110.87	118.514	118.029		112.366	87.2908	66.4826	57.9079	105.873	72.2833	69.5336	60.8656	92.3675	92.1707	91.5005	81.3403	103.423	94.6384
		111.029	123.838	144.113	189.718	112.237	151.625	142.517	163.035	118	113.243	119.682	118.351	113.429	114.246	161.974	127.711		126.636	105.589	98.7586	108.422	122.594	116.572	103.284	108.962	121.901	103.721	117.313	102.767	118.005	97.2222	102.558	113.662		114.056	85.2639	68.5287	57.149	109.228	76.8822	72.4716	66.8334	103.306	91.5918	98.0206	86.8319	104.035	85.0989
		110.417	123.838	142.123	168.952	109.605	158.303	154.932	152.529	122.286	106.081	112.301	117.729	120	117.842	159.415	129.451		120.093	106.42	96.9655	99.6461	117.49	112.611	98.1132	100.075	118.32	102.761	106.46	105.27	103.109	107.971	114.251	104.703		108.764	85.9347	68.2266	58.9791	107.193	71.1364	63.3266	65.6102	96.7566	96.8703	94.7987	89.417	85.924	91.6233
		119.118	119.49	138.806	167.339	102.763	146.209	137.245	156.226	108.571	105.405	114.761	117.729	108.857	110.512	150.091	124.632		124.766	108.006	101.172	102.052	109.121	114.147	96.0867	101.494	114.05	102.521	111.24	99.473	117.358	102.053	104.507	110.19		104.742	90.389	72.8877	60.9855	106.187	78.071	70.0111	64.966	105.046	97.2635	96.932	84.4929	107.809	92.346
		113.113	124.738	138.474	173.79	109.737	138.267	133.163	151.946	115.143	116.486	111.722	120.995	112.857	109.544	149.177	121.954		117.757	101.284	94.7586	96.6737	112.971	106.71	100.14	96.4152	108.402	97.1188	105.426	102.108	108.679	100.121	98.0512	100.336		104.106	81.1976	68.4305	55.6267	102.947	77.1765	75.2007	63.4538	94.1458	83.3735	94.3648	84.3901	96.2976	91.3981
		105.27	123.838	131.841	167.54	108.947	150.181	132.653	168.093	108	107.432	113.893	114.463	115.571	113.693	151.371	126.238		115.421	108.233	93.5172	100.142	109.874	114.066	93.6408	94.9963	114.05	96.1585	97.2868	97.2332	99.0933	101.691	105.238	107.167		109.643	87.3985	70.9319	59.7716	100.851	75.9528	70.5908	56.514	105.601	89.506	85.4196	84.9469	85.742	89.4434
		106.618	122.489	130.846	173.992	97.1053	135.74	143.707	139.494	110.857	107.162	117.077	116.019	106	113.278	160.878	122.892		108.567	102.719	94.6897	92.7813	114.728	114.228	96.5059	97.5355	108.815	91.1164	98.1912	101.318	119.301	100.483	105.238	102.352		101.828	83.86	72.3674	53.3251	118.148	84.152	67.1544	69.9208	98.1582	85.0267	83.8691	87.3286	112.548	88.7049
		104.044	121.139	140.133	159.073	109.342	142.96	144.558	146.109	108.143	109.865	108.538	101.711	114.571	111.618	145.887	116.734		110.125	99.6224	98.1379	98.3015	108.117	104.85	91.0552	102.987	103.719	98.5594	98.1912	101.976	107.124	104.106	92.6918	105.263		105.844	82.2378	70.0322	61.7966	98.8797	73.3424	62.9888	70.4867	95.9093	89.7097	90.4668	100.261	93.5001	93.2699
		105.025	124.738	130.017	170.363	113.816	141.877	135.884	140.272	101.143	109.865	108.828	109.176	106	111.065	151.188	119.545		124.143	104.909	88.8966	91.5782	108.536	110.752	92.5227	97.9836	108.678	99.3998	104.393	98.0237	96.7617	101.087	98.5384	100.896		118.204	84.104	68.3732	53.7548	95.3607	78.0617	68.0893	69.8524	107.45	90.4746	95.9247	89.7853	91.2846	91.016
		100.368	115.442	129.353	152.016	108.158	148.195	144.558	153.113	107.286	102.703	113.314	111.042	108	107.192	147.532	117.269		110.903	103.323	84.6207	100.142	112.05	109.782	90.4263	100.149	114.187	96.7587	105.297	97.7602	104.145	90.7005	89.8904	100		110.497	89.5021	65.4183	65.8756	103.599	74.0793	62.5537	65.4089	106.433	94.2124	92.9251	88.039	96.4306	84.6148
		97.9167	117.241	122.056	166.734	106.316	133.935	140.306	149.416	105.429	103.514	106.223	107.309	105.143	108.16	149.909	107.898		107.788	102.492	91.2414	93.2767	113.724	101.94	91.4046	95.5937	101.102	91.1164	94.832	95.3887	98.5751	95.0483	101.949	92.6092		110.082	87.42	74.7535	55.9435	106.968	76.1117	65.1466	63.9781	95.8961	88.0237	89.2765	88.8912	93.7535	87.8771
		106.495	124.588	119.403	162.298	116.974	142.78	127.551	159.339	104.571	107.568	108.538	109.642	111.286	104.564	134.186	115.663		104.595	97.9607	96.069	91.1536	105.858	106.548	92.6625	96.5646	97.7961	95.6783	93.1525	93.9394	99.2228	97.2222	91.352	95.8567		98.2158	78.6279	80.4578	56.1642	90.4971	74.6241	72.6474	60.6034	93.5209	88.9471	85.8245	85.6781	89.1604	92.9784
		105.147	112.744	127.695	155.645	103.289	134.477	128.061	160.311	104.429	97.7027	108.683	113.53	110	116.598	142.779	109.505		113.006	94.4864	92.2759	93.2767	111.464	114.794	92.0335	96.714	104.959	90.7563	91.8605	89.7233	96.5026	100.121	94.1535	94.7368		107.474	83.8064	72.2628	59.9291	107.915	85.3635	71.8668	60.3289	100.508	92.8903	84.5214	79.0303	87.7296	85.8687
		98.8971	115.142	120.232	145.968	98.2895	140.253	111.054	148.054	96.5714	97.2973	104.052	110.264	104.857	103.458	134.918	111.245		107.321	102.039	90.1379	94.6214	108.703	97.8981	86.5828	96.7886	102.479	89.0756	104.134	93.2806	88.7306	88.0435	100.244	103.247		108.518	88.62	74.9699	64.8235	110.595	69.8012	77.9643	65.3737	106.118	91.55	100.079	84.5972	84.6204	85.1008
		108.456	112.294	119.237	157.46	104.342	145.668	130.782	148.833	104.571	100.946	108.394	102.488	94.8571	98.8935	137.294	115.93		112.15	99.7734	89.7931	95.2583	117.908	103.8	87.0021	89.7685	97.1074	101.801	97.1576	91.0408	87.9534	78.744	95.6151	100		103.406	88.8503	75.3063	60.497	113.001	71.2577	66.5244	60.315	92.8623	100.847	89.6341	88.8304	92.7219	79.625
		104.412	116.792	137.645	176.411	103.421	133.394	130.782	153.113	92.7143	98.5135	108.973	102.799	107.714	100	143.144	115.797		112.461	104.834	89.6552	96.0368	106.862	106.629	89.5877	97.6848	105.923	86.5546	98.3204	96.0474	91.8394	91.6667	94.8843	94.1769		107.709	89.7614	65.135	54.4391	103.327	79.9356	68.5014	63.7992	114.247	87.8607	90.225	93.4319	85.262	91.6667
		104.534	122.039	121.559	164.718	98.1579	132.31	139.966	139.3	98.7143	97.8378	101.447	108.087	105	107.469	130.713	110.174		103.115	95.997	76.5517	86.1996	107.95	91.8351	90.3564	84.7647	102.893	98.3193	90.9561	100.659	91.8394	92.1498	88.4287	104.815		98.6425	78.6609	62.975	52.3317	109.976	69.4088	64.556	60.8507	104.233	100.492	89.6586	93.1275	87.4661	85.7455
		100.613	124.588	127.363	156.452	106.053	131.227	131.633	141.051	96.1429	97.2973	100.289	98.6003	100.714	101.798	137.843	107.898		108.879	90.71	81.4483	87.2611	108.787	86.7421	91.6841	89.0963	108.953	91.1164	93.5401	96.0474	91.7098	81.2802	98.9038	90.9295		108.215	72.8081	63.9496	55.7752	102.578	66.1006	69.6515	63.1662	113.324	93.6475	93.2701	97.4109	91.0594	79.8445
		99.1422	118.891	124.71	152.621	93.2895	129.603	134.354	151.751	105.429	95.4054	106.946	104.821	94.8571	101.66	130.896	104.953		99.6885	94.713	73.7241	79.1224	97.9079	90.865	91.3347	83.7939	100.138	96.6387	93.0233	93.2806	100.13	88.7681	98.0512	100.336		100.551	79.664	59.1166	51.8424	104.951	70.1103	67.9808	55.218	94.9816	101.293	86.9811	88.9903	105.558	87.3188
		98.2843	112.894	124.544	152.016	96.7105	125.993	134.014	133.268	96.7143	91.0811	103.039	104.199	105.286	92.2545	133.638	112.45		104.206	90.2568	75.1724	84.218	103.264	81.6492	84.0671	81.404	104.545	94.1176	91.9897	90.5138	100.13	86.3527	94.5189	102.576		106.025	79.9486	60.3581	55.4007	106.776	64.8046	62.7303	61.0827	108.097	103.334	89.2765	86.8663	95.1027	93.6027
		97.6716	112.894	113.765	144.355	93.1579	118.953	129.932	139.494	99	94.1892	94.356	104.977	91.8571	100.138	137.66	110.442		101.246	94.6375	74.2759	78.0609	98.6611	86.1762	87.3515	79.6117	97.9339	87.1549	88.5013	82.2134	96.2435	93.1159	89.525	96.1926		103.66	83.8289	65.2891	54.0757	105.907	72.4456	67.2286	57.0717	98.9231	92.5317	93.7951	78.3159	104.775	92.9873
		98.2843	114.543	119.403	153.024	102.105	128.339	129.082	142.802	100.857	109.595	100.434	102.955	109.714	99.7234	134.552	113.521		95.2492	84.8943	76.8966	76.9993	101.339	82.2959	86.5828	84.6901	92.4242	88.3553	88.2429	95.7839	95.2073	82.4879	99.391	100.784		96.9119	74.1158	64.4009	50.3184	99.2495	64.1237	67.076	59.3061	91.6388	80.6202	87.8614	93.0348	86.7774	82.7167
		98.5294	112.744	121.891	151.411	101.053	114.079	122.789	139.3	95.4286	95	99.5658	109.331	104.286	102.766	136.197	110.843		95.4829	89.6526	73.0345	78.9809	91.7992	86.5804	85.5346	80.5078	99.1736	84.3938	91.3437	91.8314	88.0829	89.1304	87.4543	86.4502		96.908	79.519	59.9181	52.1631	90.8429	75.8949	69.6598	57.7947	103.924	88.8355	91.742	83.9937	84.4631	86.7312
		94.4853	106.897	119.569	153.427	96.9737	121.841	124.83	139.3	100.429	100.676	100.434	97.8227	104.143	106.501	133.455	108.434		99.0654	86.4804	74.6897	79.9009	98.4937	83.9127	86.7925	76.0269	95.4545	92.9172	91.7313	86.4295	101.295	84.7826	90.8648	93.617		104.847	80.901	62.4658	52.0773	101.567	68.8706	69.5286	54.578	95.0472	92.2936	91.3347	88.3532	97.2658	79.6076
		100	100	100	100	100	100	100	100	100	100	100	100	100	100	100	100		100	100	100	100	100	100	100	100	100	100	100	100	100	100	100	100		100	100	100	100	100	100	100	100	100	100	100	100	100	100
		91.4216	92.3538	97.5124	101.008	98.8158	95.8484	87.0748	93.7743	92.5714	91.3514	93.7771	93.9347	91.1429	87.4136	108.592	95.8501		101.636	99.3202	104.621	98.1599	95.8159	102.021	99.6506	101.718	101.377	98.9196	105.943	108.169	98.8342	100.604	99.391	106.271		111.172	107.543	107.29	97.1803	96.9642	106.44	114.442	108.471	109.513	108.285	112.973	115.153	108.439	115.09
		99.3873	91.4543	88.0597	91.129	96.5789	101.805	88.0952	85.9922	100.143	95.1351	94.2113	95.4899	106	97.6487	102.559	87.2825		100.545	101.662	98	114.437	93.5565	99.3533	98.1831	106.199	96.9697	94.958	105.943	104.084	90.0259	98.43	103.654	106.271		101.165	111.161	111.288	125.577	96.8705	97.5917	111.451	123.498	96.8314	99.8138	112.453	109	84.9301	100.8
		92.7696	87.4063	78.4411	107.258	90.5263	96.9314	76.3605	79.7665	94.2857	92.8378	89.2909	95.0233	100.286	104.703	104.388	89.5582		94.704	103.776	96.6897	103.751	106.695	105.174	96.8553	106.199	102.204	93.0372	104.522	102.372	96.3731	106.401	104.385	113.886		102.085	118.729	123.264	96.7301	117.86	108.503	126.84	133.137	108.398	100.215	117.058	107.733	96.0985	101.622
		95.9559	84.5577	80.2653	111.895	98.5526	99.278	78.9116	76.8482	94.8571	83.9189	76.9899	89.1135	102.143	83.5408	102.194	84.4712		98.053	100.453	100.483	101.84	100	101.455	101.537	96.938	106.474	103.721	103.876	114.361	98.057	102.415	104.385	116.797		102.185	118.798	125.188	91.0138	101.469	102.193	128.672	126.142	112.247	123.597	134.922	128.332	95.9999	122.593
		98.8971	82.1589	86.733	91.9355	97.1053	100.181	75.5102	67.5097	99.2857	91.3514	86.2518	87.0918	100.714	93.0844	107.313	83.8019		88.7072	110.045	93.4483	104.105	100.251	102.587	93.501	103.809	91.8733	103.361	106.848	108.564	97.6684	103.382	103.654	121.165		89.6965	133.942	107.742	113.237	103.24	102.402	123.826	153.769	92.5342	113.147	123.879	124.655	96.9757	111.062
		91.1765	75.8621	84.5771	87.7016	93.6842	100.542	81.8027	73.5409	93.7143	86.7568	90.3039	78.2271	101	91.9779	98.7203	88.2195		91.9003	106.269	100.276	105.025	95.5649	107.518	98.253	113.368	98.2094	100.48	104.005	104.611	102.85	104.71	108.526	108.399		100.794	140.082	118.561	119.752	102.007	106.939	120.11	154.157	104.797	115.818	115.172	133.728	101.831	113.843
		93.6275	88.4558	77.2803	84.0726	101.316	93.6823	78.7415	72.3735	92.1429	91.4865	87.9884	86.6252	104.143	91.4246	97.8062	89.2905		88.6293	101.813	91.3103	108.209	97.8243	106.306	99.3711	112.547	97.2452	97.2389	103.23	107.773	98.1865	107.246	104.872	111.646		94.6616	115.1	118.155	128.71	96.5538	113.475	126.199	155.508	105.537	106.288	117.322	124.413	94.2806	117.306
		93.3824	75.1124	79.9337	104.637	92.6316	101.986	71.5986	72.5681	93.1429	85.6757	81.3314	77.916	103	86.5837	98.1718	81.7938		94.1589	109.215	98.2759	112.668	94.8954	107.599	92.5227	112.248	91.5978	97.9592	113.437	113.57	86.658	102.536	104.994	116.685		100.832	145.401	122.947	107.675	102.444	105.504	129.224	154.679	98.3412	114.337	139.475	145.76	84.134	118.424
		87.9902	78.4108	76.6169	119.355	99.8684	92.7798	76.3605	68.8716	98.8571	83.9189	93.7771	84.1369	104.286	89.7649	92.6874	78.8487		96.729	100.076	99.931	100.708	91.8828	106.225	100.839	112.995	93.2507	101.2	105.426	106.456	93.0052	103.865	107.795	109.406		109.932	127.63	130.429	84.3767	92.0039	114.491	132.056	164.066	94.3287	120.593	112.422	126.527	89.1831	115.708
		96.9363	74.5127	89.3864	84.6774	97.7632	84.8375	67.8571	65.1751	93.2857	80.5405	83.2127	77.7605	100.286	82.0194	86.106	83.1325		91.5888	107.779	97.6552	112.739	93.9749	105.74	101.677	106.647	95.3168	99.1597	106.848	115.81	95.8549	105.556	94.7625	114.334		94.4835	144.646	109.251	133.139	96.1251	124.638	149.84	163.631	102.177	123.118	128.403	148.932	95.5818	128.696
		101.593	87.4063	76.1194	78.0242	98.9474	89.8917	74.4898	71.0117	85.2857	85.6757	85.2388	72.6283	105.571	89.7649	94.1499	72.2892		92.6791	105.363	102.414	104.954	86.4435	93.9369	101.677	117.924	92.4242	98.5594	108.269	114.097	101.425	104.469	107.552	119.821		91.2258	120.543	134.544	134.515	87.3631	104.5	136.498	166.063	108.37	115.038	127.018	157.098	96.0723	116.38
		89.5833	75.8621	79.9337	90.3226	91.0526	94.9458	75.1701	59.9222	91.2857	80.5405	85.2388	75.2722	89.4286	78.1466	93.7843	75.502		89.4081	105.891	100.414	107.997	96.8201	107.437	104.682	114.115	89.6694	104.682	106.977	123.188	93.9119	104.589	106.456	108.959		99.8044	139.584	125.621	119.568	106.334	113.156	139.26	190.439	98.2294	129.974	125.502	163.657	105.013	133.837
		92.402	80.5097	86.0697	75.4032	94.3421	85.0181	70.068	58.5603	100.571	81.4865	76.2663	67.9627	97.4286	91.2863	94.5155	74.4311		93.3022	110.498	96.2069	106.299	95.5649	106.386	98.4626	119.866	95.3168	102.281	114.341	116.864	95.8549	108.333	106.699	119.261		100.974	137.249	111.778	140.974	101.296	125.134	140.524	204.687	94.7752	125.519	149.924	171.954	98.3848	118.674
		89.8284	83.958	80.4312	74.1935	90.3947	85.1986	66.4966	57.5875	99	82.1622	76.7004	74.9611	99.2857	86.3071	86.4717	73.3601		93.9252	108.686	98.4828	111.96	98.0753	107.922	96.8553	114.339	95.73	94.4778	105.297	111.726	96.8912	110.386	114.251	123.068		104.561	129.453	122.444	150.903	108.497	126.672	145.655	198.548	96.697	114.989	137.284	149.045	97.5883	127.9
		102.083	84.1079	74.461	73.3871	100.526	92.2383	61.7347	63.035	97.7143	84.3243	84.9493	75.2722	103.571	84.6473	96.5265	67.2021		96.6511	107.175	104.483	114.791	95.2301	113.177	95.8071	120.314	96.4187	105.642	116.408	118.841	96.3731	100.483	116.322	124.188		94.6786	127.426	140.319	156.419	94.7315	122.701	155.192	190.868	98.6741	125.281	137.033	157.881	93.0498	118.708
		93.3824	81.1094	71.1443	74.5968	89.8684	93.3213	68.0272	58.9494	96.8571	78.5135	74.8191	77.7605	100.857	87.5519	83.5466	75.7697		94.704	113.746	99.2414	109.837	93.3054	105.821	109.504	114.787	95.73	103.121	107.494	121.344	103.497	107.126	105.968	119.037		101.415	140.238	139.493	147.241	103.825	113.394	160.971	194.721	98.8363	131.342	143.671	156.048	102.618	122.357
		89.5833	67.916	74.1294	77.4194	93.2895	85.3791	59.8639	57.9767	91.4286	86.4865	81.3314	68.5848	105.429	77.1784	88.8483	72.5569		92.2118	105.06	100.828	106.936	94.477	110.024	97.4144	115.534	95.1791	101.801	115.375	125.428	100.13	101.329	105.968	120.829		102.934	154.692	136.016	138.125	101.273	128.866	162.726	199.277	104.102	117.707	141.857	182.881	94.9738	131.291
		92.7696	77.5112	84.5771	74.7984	91.5789	92.5993	67.6871	61.6732	91.5714	85.4054	82.3444	66.2519	87.2857	83.8174	100.731	69.7456		87.2274	102.87	103.379	110.403	97.4059	110.914	100.559	115.086	97.6584	105.522	123.643	130.567	95.5959	104.589	102.68	113.886		94.0259	132.716	122.231	147.601	106.363	119.778	148.565	186.606	106.647	123.554	150.154	197.076	109.521	124.782
		89.8284	77.3613	75.1244	66.9355	91.5789	90.0722	65.4762	59.9222	91.5714	75.1351	78.2923	75.7387	103	74.6888	78.245	68.8086		86.838	106.722	104.828	112.951	92.9707	108.165	96.9951	113.891	97.1074	108.043	129.457	126.877	91.4508	109.903	117.54	124.412		96.671	137.953	139.539	168.746	101.52	120.087	148.138	190.065	106.046	143.799	165.351	167.52	88.7872	147.148
		92.1569	80.6597	69.3201	75.4032	96.3158	88.0866	61.7347	66.537	95.4286	76.6216	80.1737	74.9611	95.7143	89.7649	84.0951	66.5328		96.3396	107.477	103.448	108.634	92.8033	114.713	107.198	112.995	97.1074	107.923	107.106	122.793	98.9637	108.092	110.231	116.797		104.539	133.248	149.233	144.071	96.3532	130.227	173.643	169.823	101.759	140.852	133.592	163.809	103.395	120.417
		94.2402	80.6597	71.9735	72.379	98.6842	89.1697	66.3265	65.9533	93.7143	80.6757	75.398	70.9176	97.1429	78.8382	88.2998	74.0295		92.9907	113.369	104.759	118.542	93.9749	112.53	99.7904	117.849	90.7713	111.044	122.481	118.05	90.544	100.966	108.161	117.469		98.6741	140.552	145.552	163.78	95.2279	126.198	150.453	178.686	96.8597	137.643	162.446	166.461	93.2071	128.068
		97.7941	75.4123	78.7728	62.9032	95.5263	87.5451	62.2449	59.5331	93	80.9459	68.1621	71.3841	92.8571	82.296	89.5795	64.7925		88.785	102.795	102.897	112.031	93.8912	113.015	101.817	116.206	97.7961	104.922	107.364	118.314	96.5026	109.179	117.052	122.956		90.7877	136.31	130.624	178.101	98.2883	129.094	163.575	195.196	105.157	129.62	157.513	165.742	103.926	132.666
		96.201	77.3613	65.0083	68.5484	90.9211	81.2274	63.4354	55.0584	82	83.5135	82.055	66.563	103.429	89.0733	85.7404	70.0134		87.5389	106.647	97.3793	109.696	88.4519	110.833	99.5807	112.92	103.581	102.401	116.021	119.368	83.0311	106.039	111.571	119.261		90.9959	137.855	149.795	160.027	97.2843	136.447	156.98	205.092	126.319	122.616	141.394	179.33	80.2787	119.046
		91.0539	67.4663	70.1493	82.2581	100.132	82.6715	57.1429	48.8327	95.2857	80.8108	72.9378	68.5848	94.2857	84.2324	85.9232	69.4779		88.6293	103.927	100.828	114.933	89.1213	107.195	102.446	120.314	100.413	105.762	117.571	117.391	95.8549	104.831	114.007	119.933		97.3371	154.044	143.733	139.722	89.0042	129.664	179.28	246.379	105.381	130.876	161.194	171.162	101.664	124.454
		88.3578	59.8201	66.0033	66.9355	97.2368	82.3105	58.8435	52.5292	90.5714	75	83.5022	68.8958	95	80.6362	92.5046	65.328		91.9782	106.722	99.0345	115.004	89.8745	118.513	103.564	119.417	91.0468	105.402	108.915	127.931	94.9482	105.435	106.699	124.076		104.097	178.405	150.045	171.813	92.4284	143.982	175.999	227.335	100.525	140.536	130.433	185.688	99.9455	130.754
		90.8088	69.2654	63.0182	62.9032	84.4737	88.2671	61.5646	56.2257	95.1429	70.2703	85.9624	69.6734	98.5714	83.4025	87.2029	67.4699		92.2118	105.514	92.4828	117.551	93.2218	110.994	101.398	117.028	95.73	103.842	110.465	125.56	95.7254	106.884	115.834	118.589		101.545	152.332	146.756	186.876	110.356	125.748	164.701	208.139	100.617	147.774	128.504	180.212	97.1127	128.155
		92.2794	78.4108	71.6418	66.7339	99.3421	88.0866	54.4218	60.5058	97.7143	80.4054	76.1216	63.7636	101.571	87.4136	78.6106	64.257		86.7601	109.063	104.897	115.287	91.2971	106.386	102.166	121.733	94.7658	107.683	116.537	126.746	95.8549	107.488	112.789	118.589		94.0189	139.092	146.418	172.756	91.9017	120.775	187.731	201.192	96.9826	133.925	153.094	198.774	94.3719	122.965
		89.4608	73.0135	66.1692	62.2984	98.4211	82.852	65.9864	61.284	99.4286	71.6216	79.5948	65.4743	91.5714	76.9018	90.4936	63.5877		91.2773	110.045	96.4828	121.939	94.8954	103.8	109.644	117.102	99.1736	106.843	115.504	127.273	88.601	105.435	113.276	115.006		102.03	150.719	145.812	195.734	96.4178	125.283	166.161	191.081	99.7435	149.177	145.115	194.386	96.7562	137.103
		99.3873	66.4168	68.6567	72.5806	93.1579	89.7112	57.6531	55.2529	84.8571	75.2703	72.3589	63.4526	97.5714	77.0401	81.5356	64.5248		91.3551	114.199	101.241	112.385	104.268	114.39	101.468	114.264	104.545	112.725	118.217	128.986	98.8342	112.681	109.988	124.076		91.9184	171.944	147.46	154.842	111.926	127.509	175.997	206.802	123.202	149.76	163.376	203.279	101.294	146.263
		94.8529	74.2129	68.9884	63.9113	92.3684	83.213	60.2041	56.6148	98.8571	73.5135	69.6093	70.14	93.4286	79.5297	89.7623	65.328		94.6262	106.949	101.655	111.96	95.1464	110.59	106.709	118.82	96.1433	112.965	107.881	130.567	93.5233	103.382	115.956	117.805		99.7609	144.111	147.351	175.181	103.008	132.9	177.245	209.875	97.2547	153.666	154.981	186.151	100.101	129.991
		92.1569	70.3148	61.8574	61.0887	96.5789	84.8375	52.8912	49.6109	90.8571	75.4054	74.2402	63.297	95.8571	73.3057	83.5466	66.3989		83.7227	106.193	102.621	108.705	91.9665	112.369	101.677	119.791	84.022	122.809	111.628	111.331	89.7668	106.28	113.155	120.941		90.8481	151.026	165.899	177.946	95.2242	132.452	192.238	241.461	92.4771	162.865	150.36	175.886	93.6465	144.982
		86.6422	70.9145	70.9784	60.8871	89.0789	82.491	56.1224	57.5875	88.8571	76.0811	78.437	67.3406	101.143	75.1037	88.6654	65.1941		93.3022	108.61	103.31	112.739	94.0586	107.033	102.446	124.122	96.281	106.843	117.959	129.776	84.5855	113.285	119.61	122.62		107.687	153.157	145.552	185.161	105.59	129.751	182.54	215.537	108.355	140.433	150.386	192.716	83.6297	150.838
		90.6863	74.6627	77.6119	63.1048	92.7632	75.0903	64.2857	58.5603	93.2857	74.5946	80.6078	60.0311	100.714	71.0927	81.7185	66.3989		92.9128	104.683	105.448	109.766	98.5774	109.135	111.251	124.122	98.2094	110.084	114.599	122.53	94.9482	105.072	106.456	120.717		102.455	140.208	135.866	173.943	106.268	145.338	173.057	211.957	105.278	147.576	142.169	204.11	94.2748	147.796
		94.1176	65.0675	71.9735	61.4919	93.4211	83.574	57.9932	54.4747	93.4286	84.4595	74.3849	64.0747	93.1429	75.1037	80.2559	61.5797		103.66	111.405	103.034	115.145	95.1464	112.692	110.692	124.272	108.54	107.803	114.47	122.793	99.8705	110.145	114.495	122.06		110.139	171.214	143.156	187.252	101.847	134.841	190.87	228.128	116.174	127.639	153.889	191.641	107.223	146.657
		84.6814	72.7136	65.5058	60.4839	86.4474	82.13	55.2721	55.642	99.4286	73.3784	69.754	64.6967	95.7143	80.083	84.6435	62.6506		95.0935	103.927	99.4483	112.81	94.2259	109.054	102.446	126.139	91.5978	106.242	110.853	127.141	87.6943	112.923	106.699	125.084		112.296	142.927	151.816	186.512	108.998	132.782	185.348	226.697	92.1242	144.787	158.92	196.518	91.6209	141.007
		88.2353	69.4153	70.8126	63.3065	82.3684	72.5632	56.6327	58.3658	86.8571	72.4324	69.6093	63.7636	77.7143	81.4661	76.5996	62.7845		91.9003	113.218	98.2069	109.271	91.2971	117.381	103.215	118.82	100.826	102.041	121.189	126.482	93.9119	109.42	106.09	125.532		104.154	163.102	138.686	172.607	110.84	161.764	182.253	203.578	116.083	140.877	174.098	198.361	120.843	134.314
		91.0539	63.7181	72.6368	63.3065	91.0526	74.1877	50	51.751	97	71.6216	75.398	61.7418	93	75.9336	78.4278	69.0763		92.9907	106.495	104.69	112.527	90.6276	108.407	111.74	120.762	90.0826	105.642	120.284	121.476	87.5648	110.99	120.097	129.227		102.127	167.135	144.128	177.749	99.5332	146.126	223.48	233.352	92.8687	147.501	159.532	196.748	94.1557	146.168
		92.5245	68.9655	66.6667	59.2742	89.3421	72.9242	56.8027	50.3891	88.2857	68.7838	70.1881	68.7403	94.2857	81.0512	69.287	63.7216		88.4735	102.568	104.828	115.357	88.7866	113.985	105.241	122.778	102.755	104.682	122.222	132.148	92.0984	111.353	114.251	117.357		95.6217	148.724	157.241	194.617	99.3782	156.307	185.275	243.66	116.389	152.19	174.135	192.242	97.6802	137.386
		87.6225	72.7136	73.1343	68.75	83.9474	83.7545	54.2517	47.4708	86.4286	67.8378	78.8712	69.5179	90.1429	77.1784	74.4059	62.7845		91.8224	101.813	103.172	114.084	89.1213	113.662	105.59	111.501	110.606	109.244	105.297	130.303	91.1917	108.213	121.803	125.868		104.793	140.019	141.072	165.94	106.163	135.709	194.631	234.884	127.974	161.037	133.505	187.438	101.164	140.211
		90.8088	64.4678	72.3051	65.9274	93.9474	87.7256	53.5714	51.751	105.429	78.1081	72.7931	60.0311	103.571	79.9447	80.8044	59.8394		89.4081	106.647	103.034	109.696	91.9665	111.641	107.617	120.911	102.755	109.724	110.207	119.763	88.4715	107.85	114.373	128.779		98.4575	165.426	142.5	166.389	97.8915	127.262	200.885	233.64	97.4639	140.477	151.397	199.501	85.4208	134.906
		82.8431	70.6147	64.6766	64.3145	85	79.6029	55.4422	46.1089	96.8571	69.7297	71.78	60.9642	93.4286	77.0401	70.7495	65.7296		90.3427	110.347	100.207	114.154	90.8787	106.306	104.123	126.512	85.3994	106.002	120.026	117.918	89.3782	110.628	116.809	120.381		109.053	156.267	154.935	177.494	106.916	133.545	187.805	274.377	88.1705	152.019	167.213	193.422	95.6648	143.598
		92.5245	67.1664	67.6617	61.6935	92.8947	74.5487	47.9592	50.9728	94.1429	69.3243	80.0289	65.3188	102.143	78.8382	74.4059	65.8635		90.5763	107.779	107.931	109.059	94.3096	110.752	112.718	119.193	94.9036	105.762	126.615	129.908	93.5233	106.039	124.117	118.365		97.8944	160.466	159.516	176.775	101.523	148.563	235.03	233.837	100.808	152.562	158.211	198.883	91.5613	134.502
		86.0294	72.2639	74.7927	54.2339	89.0789	75.9928	48.4694	53.1128	93.1429	74.8649	70.4776	59.7201	94.5714	74.5505	76.9653	58.2329		89.486	107.251	101.241	116.207	91.2971	114.632	110.692	119.119	90.3581	115.966	113.178	127.404	88.2124	111.473	115.104	126.764		104.018	148.415	135.363	214.27	102.49	150.846	228.375	224.275	97.0103	154.901	160.588	213.336	93.276	149.527
		87.5	76.4618	67.1642	89.5161	91.9737	75.9928	55.6122	49.4163	93.1429	71.4865	73.2272	63.4526	87.2857	77.5934	75.6856	58.5007		92.4455	111.858	105.448	114.72	89.1213	111.641	104.822	124.571	89.6694	107.443	117.7	117.26	94.4301	112.077	115.956	117.469		105.652	146.293	157.001	128.156	96.8987	146.91	188.487	252.084	96.2709	150.298	160.733	184.799	108.185	144.442
		89.5833	68.2159	65.6716	59.879	87.1053	80.1444	53.4014	56.6148	99.8571	73.2432	69.3198	56.1431	88.1429	67.6349	66.5448	64.5248		93.1464	111.027	96.6207	116.631	91.2134	116.411	105.381	117.401	102.342	121.849	127.132	123.452	85.2332	105.314	115.347	124.636		103.977	162.759	147.127	194.778	104.716	145.251	197.337	207.368	102.488	166.362	183.399	219.888	96.6989	155.71
[truncated: 548 more rows]
[truncated: 2 more columns]
