# Supplementary figures and images for: Structural and functional properties of a magnesium transporter of the SLC11/NRAMP family
Source: eLife journal article supplement (doi:10.7554/elife.74589), 2022-01-10

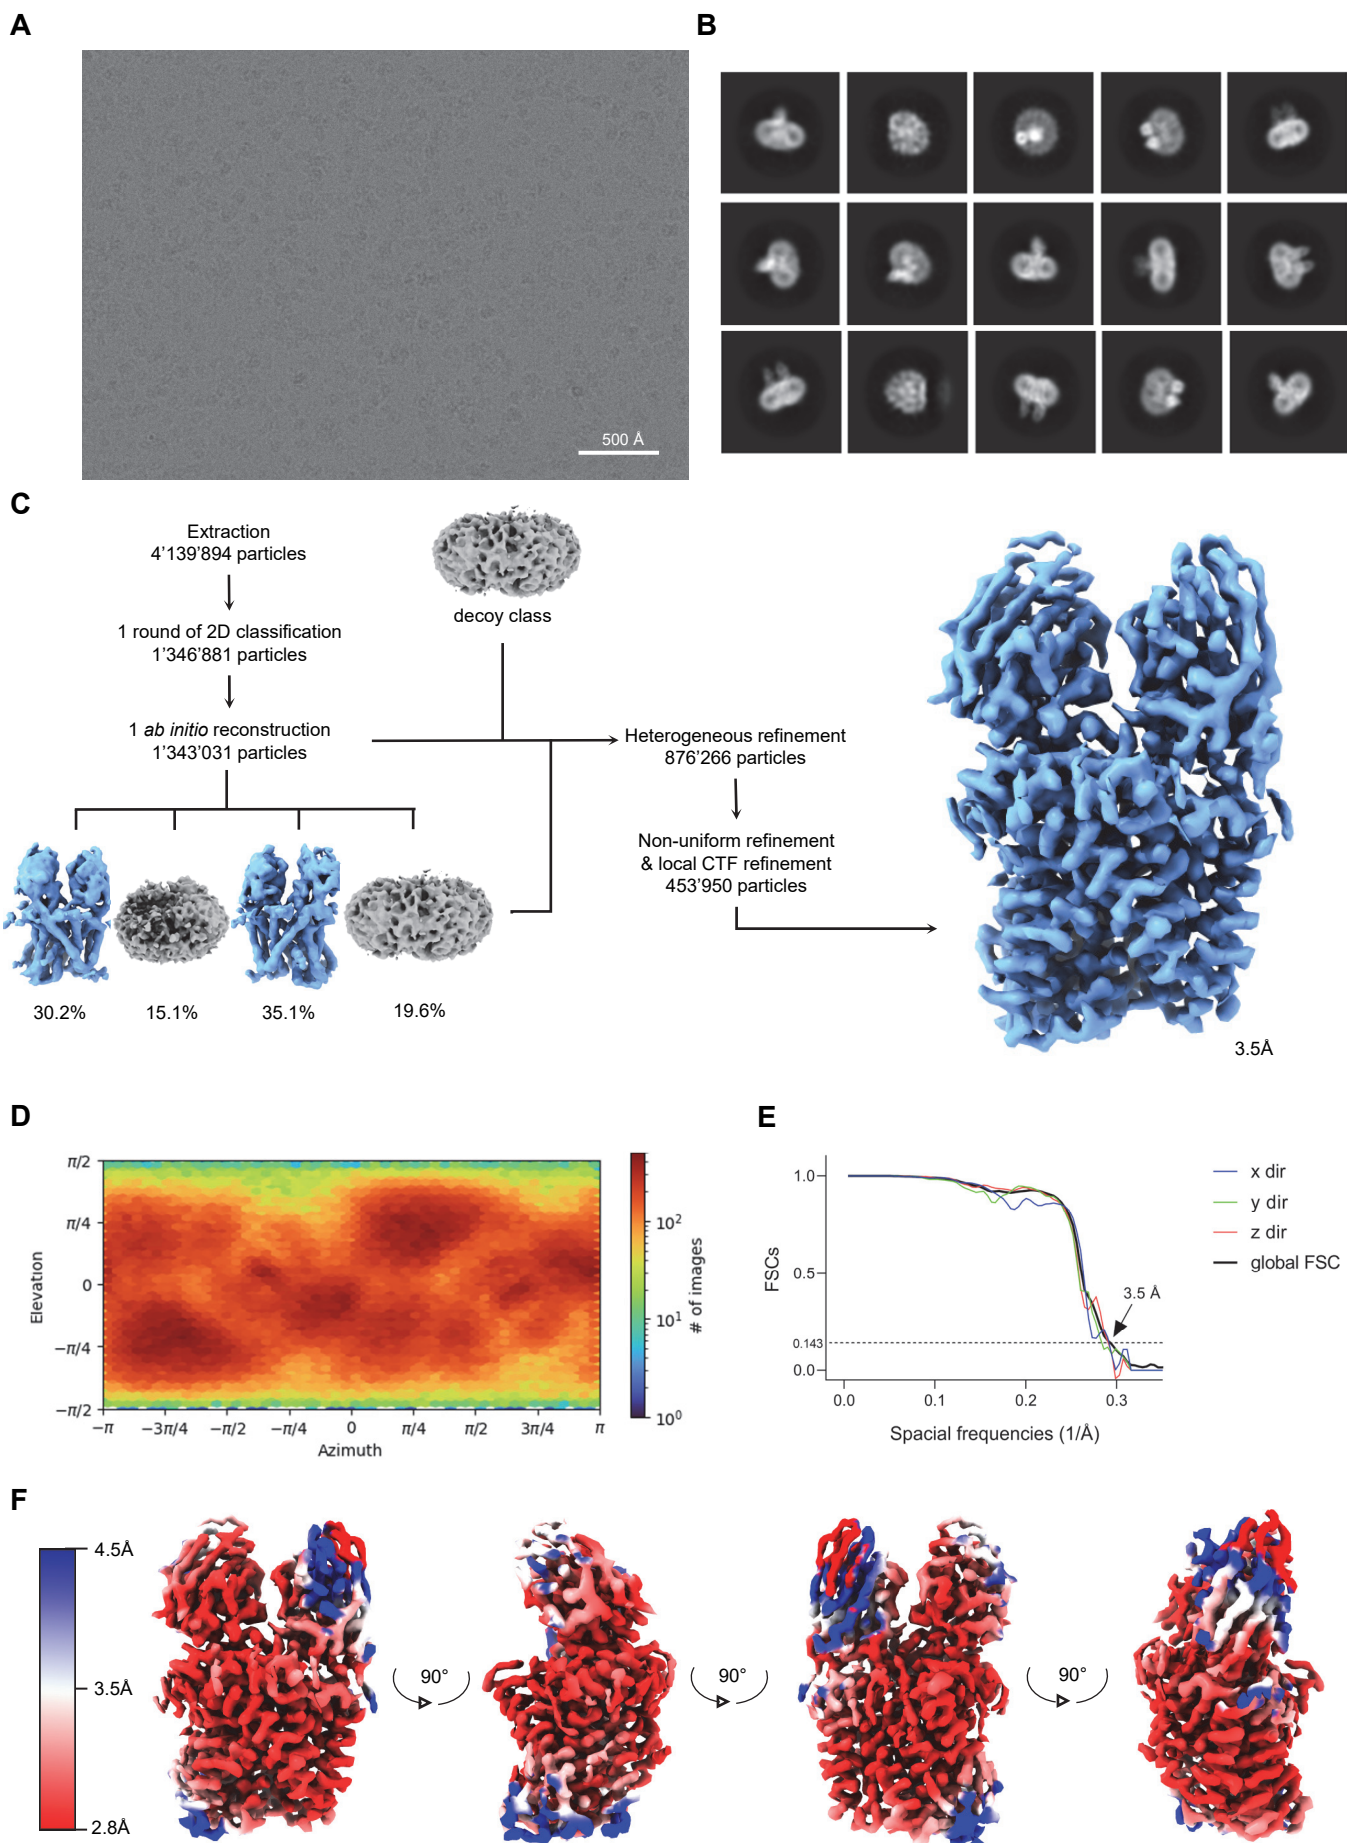

Supplement: supp [file elife_poa_e74589_Figure_5_figure_supplement_1.pdf › elife_poa_e74589_Figure_5_figure_supplement_1.pdf]

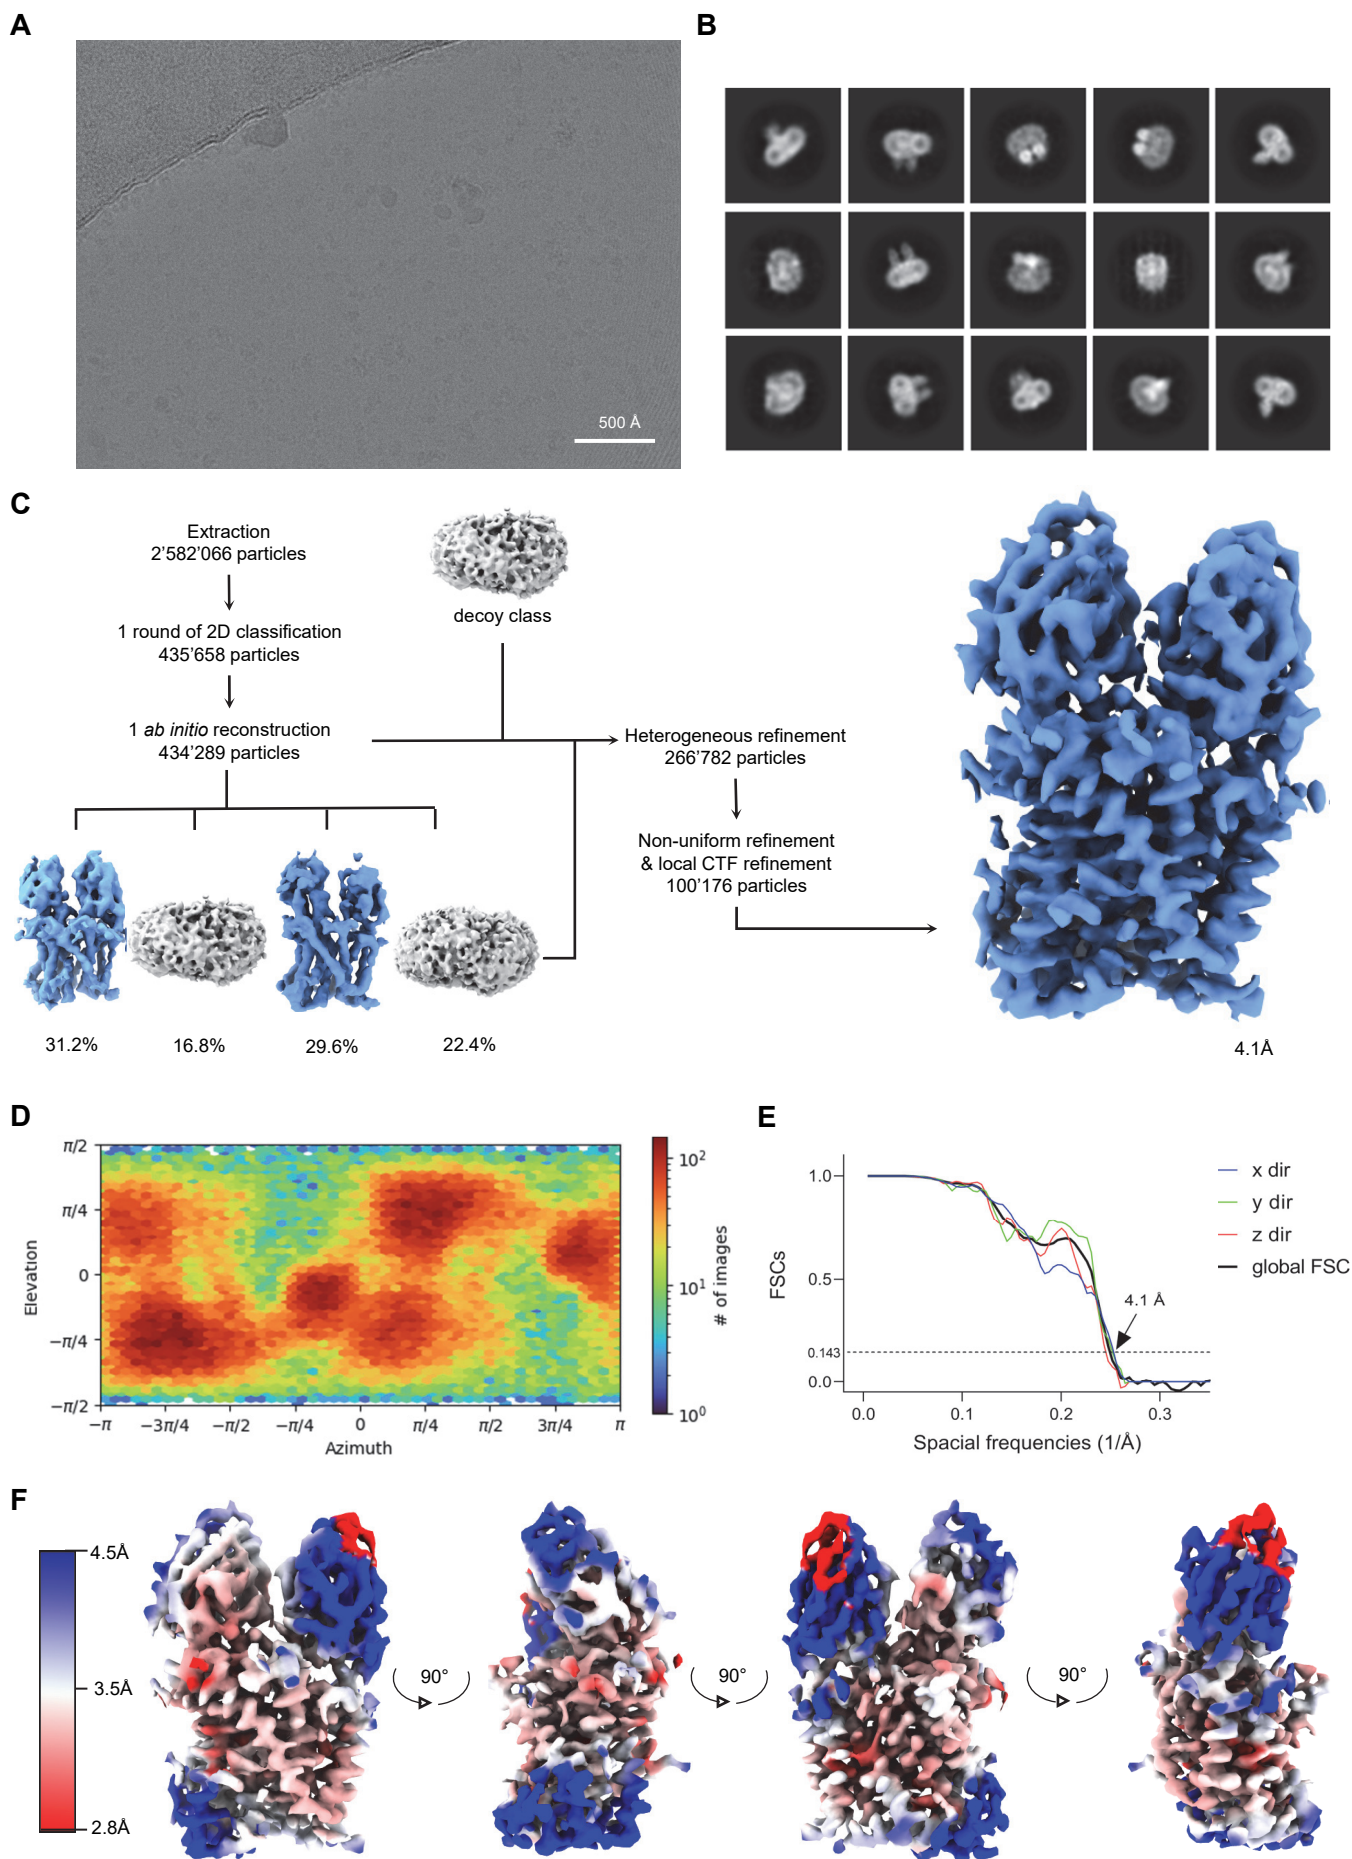

Supplement: supp [file elife_poa_e74589_Figure_5_figure_supplement_2.pdf › elife_poa_e74589_Figure_5_figure_supplement_2.pdf]

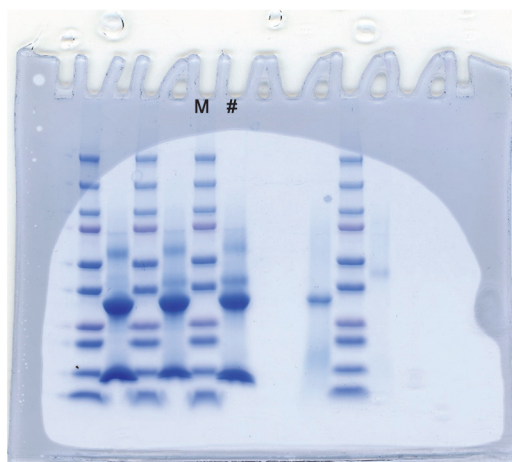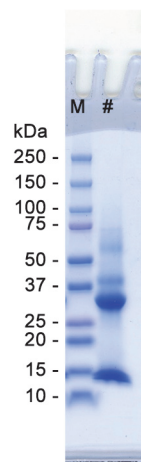

Supplement: supp [file Figure4_supplement1D_gel.pdf › source data/Figure4_supplement1D_gel.pdf]
